# Supplementary material for: The Beneficial Effect of Mitochondrial Transfer Therapy in 5XFAD Mice via Liver–Serum–Brain Response
Source: Cells. 2023 Mar 24;12(7):1006. doi: 10.3390/cells12071006 (PMC10093713; doi:10.3390/cells12071006)
Supplement: Supplementary file 1 [file cells-12-01006-s001.zip]

Archive with 5 entries (5 files):
- Supplemental Hippocampus Aggregates Proteomics excel.xlsx
- Supplemental Hippocampus Phospho Proteomics excel .xlsx
- Supplemental Hippocampus Proteomics excel.xlsx
- Supplemental Liver Proteomics excel.xlsx
- Supplemental Tables, Figure, Methods 14.2.23A.pdf
