# Supplementary material for: The Beneficial Effect of Mitochondrial Transfer Therapy in 5XFAD Mice via Liver–Serum–Brain Response
Source: Cells. 2023 Mar 24;12(7):1006. doi: 10.3390/cells12071006 (PMC10093713; doi:10.3390/cells12071006)
Supplement: Supplementary file 1 [file cells-12-01006-s001.zip › Supplemental Hippocampus Aggregates Proteomics excel.xlsx]

## Sheet: Sheet1
			Tg vs Tg-Mito				Tg vs WT				Tg-Mito vs WT				Log2 LFQ intensity																														Intensity
Majority protein IDs	Protein names	Gene names	Student's T-test p-value Tg_Tg-Mito	Student's T-test q-value Tg_Tg-Mito	Student's T-test Difference Tg_Tg-Mito	Fold Change	Student's T-test p-value Tg_WT	Student's T-test q-value Tg_WT	Student's T-test Difference Tg_WT	Fold Change	Student's T-test p-value Tg-Mito_WT	Student's T-test q-value Tg-Mito_WT	Student's T-test Difference Tg-Mito_WT	Fold Change	LFQ intensity SDS 1 Tg 1340.3 F	LFQ intensity SDS 2 Tg 1336.3 M	LFQ intensity SDS 3 Tg 1336.4 M	LFQ intensity SDS 4 Tg 1338.2 M	LFQ intensity SDS 5 Tg-Mito 1340.1 F	LFQ intensity SDS 6 Tg-Mito 1340.2 F	LFQ intensity SDS 7 Tg-Mito 1336.1 M	LFQ intensity SDS 8 Tg-Mito 1336.2 M	LFQ intensity SDS 9 Tg-Mito 1338.1 M	LFQ intensity SDS 10 WT 1341.1 F	LFQ intensity SDS 11 WT 1341.2 F	LFQ intensity SDS 12 WT 1337.1 M	LFQ intensity SDS 13 WT 1337.2 M	LFQ intensity SDS 14 WT 1337.3 M	Only identified by site	Potential contaminant	GOBP slim name	GOCC slim name	KEGG name	Pfam	Peptides	Razor + unique peptides	Unique peptides	Sequence coverage [%]	Unique + razor sequence coverage [%]	Unique sequence coverage [%]	Mol. weight [kDa]	Q-value	Score	MS/MS Count	Intensity SDS 1 Tg 1340.3 F	Intensity SDS 2 Tg 1336.3 M	Intensity SDS 3 Tg 1336.4 M	Intensity SDS 4 Tg 1338.2 M	Intensity SDS 5 Tg-Mito 1340.1 F
Q61703	Inter-alpha-trypsin inhibitor heavy chain H2	Itih2	5.7656e-13	0.012	7.51404	182.789	0.453011	1	1.3844	2.61063	0.00399957	0.0753846	-6.12964	0.0142822	26.5277	26.4554	26.3749	26.6982	19	19	19	19	19	26.3142	26.9382	26.774	19	26.6217			amine metabolic process;carbohydrate metabolic process;macromolecule metabolic process;metabolic process;nitrogen compound metabolic process;polysaccharide metabolic process;primary metabolic process	extracellular organelle;organelle;vesicle		ITI_HC_C;VIT;VWA	3	3	3	5.7	5.7	5.7	105.93	0.00097784	2.7718	2	48353000	44214000	36779000	462440000	0
Q80X32	UPF0461 protein C5orf24 homolog	MGI:1925771	3.54437e-12	0.03	5.23576	37.6809	0.0582566	0.330977	3.19979	9.18822	0.141242	0.43725	-2.03597	0.243843	24.1817	24.2134	24.4155	24.1324	19	19	19	19	19	19	24.1975	23.9824	19	19							2	2	2	18.6	18.6	18.6	20.139	0.0088705	1.8998	3	23616000	24190000	24215000	8972300	0
P16254	Signal recognition particle 14 kDa protein	Srp14	1.33536e-08	0.0546667	-6.19342	0.0136646	0.0682457	0.329917	-3.75174	0.074236	0.153254	0.444162	2.44168	5.43273	19	19	19	19	25.5004	24.9654	24.8127	24.9256	25.7629	19	19	25.2138	24.8943	25.6506			establishment of localization;protein targeting;protein transport;response to chemical stimulus;response to drug;response to stimulus;transport	cell part;cytoplasm;extracellular organelle;intracellular membrane-bounded organelle;intracellular non-membrane-bounded organelle;intracellular organelle;macromolecular complex;nucleolus;nucleus;organelle;ribonucleoprotein complex;signal recognition particle;vesicle	Protein export	SRP14	3	3	3	33.6	33.6	33.6	12.51	0	10.485	3	0	0	0	0	12607000
Q02780	Nuclear factor 1 A-type	Nfia	3.60011e-07	0.102	-4.17309	0.055434	0.196969	0.719264	-2.02193	0.246228	0.127905	0.419092	2.15115	4.44183	19	19	19	19	23.1822	22.6797	22.9029	23.8725	23.2282	19	19	24.6127	19	23.4969			biological regulation;biosynthetic process;cellular component organization;cellular metabolic process;cellular nitrogen compound metabolic process;cellular process;developmental maturation;developmental process;DNA metabolic process;DNA replication;macromolecule metabolic process;metabolic process;nitrogen compound metabolic process;nucleobase-containing compound metabolic process;primary metabol…	cell part;intracellular membrane-bounded organelle;intracellular organelle;nucleoplasm;nucleus;organelle		CTF_NFI;MH1;NfI_DNAbd_pre-N	3	2	2	8.8	6.4	6.4	58.552	0.0046483	2.3049	3	0	0	0	0	2078700
Q8C3F2	Constitutive coactivator of PPAR-gamma-like protein 2	Fam120c	0.000301176	0.275105	-0.516111	0.699254	0.0305381	0.971171	-0.269079	0.829849	0.0374801	0.672934	0.247032	1.18676	26.28	26.4583	26.3016	26.2486	26.8105	26.9259	26.9487	26.8824	26.6237	26.7192	26.6017	26.394	26.8089	26.4322							11	10	10	11.9	10.6	10.6	119.72	0	20.336	30	74160000	130930000	88320000	86736000	29400000
Q9DC51	Guanine nucleotide-binding protein G(i) subunit alpha	Gnai3	0.000435243	0.484943	-0.264537	0.832466	0.538331	1	-0.0702307	0.952486	0.0839491	0.755623	0.194306	1.14417	26.9092	27.0224	26.948	27.0131	27.1305	27.3168	27.2301	27.2768	27.2343	27.1719	27.0227	26.9149	27.3192	26.7883			biological regulation;cell cycle;cell division;cellular component organization;cellular membrane organization;cellular process;membrane fusion;membrane organization;metabolic process;organelle fusion;organelle organization;response to stimulus;signal transduction;vesicle organization	cell part;centrosome;cytoplasm;cytoplasmic membrane-bounded vesicle;extracellular organelle;Golgi apparatus;intracellular membrane-bounded organelle;intracellular non-membrane-bounded organelle;intracellular organelle;macromolecular complex;membrane;microtubule organizing center;midbody;organelle;plasma membrane;protein complex;vesicle	Axon guidance;Chagas disease (American trypanosomiasis);Chemokine signaling pathway;Gap junction;Gastric acid secretion;Leukocyte transendothelial migration;Long-term depression;Melanogenesis;Progesterone-mediated oocyte maturation;Tight junction;Toxoplasmosis	G-alpha	13	6	6	37	20.1	20.1	40.538	0	18.251	59	123980000	148910000	141170000	153520000	37555000
Q9QYB8	Beta-adducin	Add2	0.00102516	0.427778	-0.409014	0.753138	0.142508	1	-0.265104	0.832139	0.366764	0.871937	0.14391	1.1049	28.9829	29.1003	29.1317	28.9782	29.4762	29.404	29.5065	29.6304	29.2693	29.6092	29.2785	29.2101	28.8672	29.6019			anatomical structure development;biological regulation;cellular component assembly;cellular component organization;cellular process;cytoskeleton organization;developmental process;macromolecular complex assembly;organelle organization;protein complex assembly;regulation of organelle organization	cell part;cytoplasmic membrane-bounded vesicle;F-actin capping protein complex;intracellular membrane-bounded organelle;intracellular organelle;macromolecular complex;membrane;organelle;plasma membrane;protein complex;vesicle		Aldolase_II	23	20	20	37.9	35.6	35.6	80.641	0	100.44	157	556440000	550950000	592170000	546660000	219420000
Q8BZX4	Splicing regulatory glutamine/lysine-rich protein 1	Srek1	0.00143437	0.212353	1.00219	2.00303	0.0149645	0.423889	0.752957	1.68524	0.297016	0.788465	-0.249228	0.841347	24.6382	24.4177	24.208	23.9884	23.0888	23.1343	23.095	23.4496	23.7868	22.9082	23.7615	23.9039	23.7478	23.4793			cellular metabolic process;cellular nitrogen compound metabolic process;cellular process;macromolecule metabolic process;metabolic process;mRNA metabolic process;mRNA processing;nitrogen compound metabolic process;nucleobase-containing compound metabolic process;primary metabolic process;RNA metabolic process;RNA processing;RNA splicing	cell part;macromolecular complex;nucleoplasm;ribonucleoprotein complex;spliceosomal complex			2	2	2	4.9	4.9	4.9	56.763	0	5.4193	4	20748000	21451000	14724000	19301000	3433900
Q2TPA8	Hydroxysteroid dehydrogenase-like protein 2	Hsdl2	0.00166841	0.1056	-4.17784	0.0552516	0.511775	1	-1.15938	0.447705	0.0484261	0.312825	3.01846	8.10302	19	19	19	22.7616	24.3112	24.4334	23.9365	24.3259	23.5842	24.025	19	19	24.4739	19				cell part;intracellular membrane-bounded organelle;intracellular organelle;membrane;microbody;mitochondrion;organelle;peroxisome		adh_short;SCP2	2	2	2	5.1	5.1	5.1	54.208	0.0037618	2.3781	3	0	0	0	4295200	5732300
Q60809	CCR4-NOT transcription complex subunit 7	Cnot7	0.00182143	0.245704	-0.675704	0.626027	0.457153	1	0.987699	1.98302	0.172291	0.467186	1.6634	3.16763	24.393	24.538	24.4452	24.1382	25.346	24.9236	25.2356	24.7873	24.979	19	24.3807	24.8337	24.6537	24.0865			biological regulation;biosynthetic process;catabolic process;cellular component assembly;cellular component organization;cellular macromolecular complex assembly;cellular metabolic process;cellular nitrogen compound metabolic process;cellular process;gene silencing;macromolecular complex assembly;macromolecule metabolic process;metabolic process;mRNA metabolic process;mRNA processing;nitrogen com…	cell part;cytoplasm;intracellular membrane-bounded organelle;intracellular non-membrane-bounded organelle;intracellular organelle;macromolecular complex;membrane;nucleus;organelle;protein complex;ribonucleoprotein complex;transcription factor complex	RNA degradation	CAF1	2	2	2	13.7	13.7	13.7	32.718	0.0010593	3.7243	5	29018000	32551000	29508000	19663000	11518000
Q8BPU7	Engulfment and cell motility protein 1	Elmo1	0.00198646	0.233377	-0.665853	0.630316	0.0999861	0.735789	-0.610351	0.655037	0.844245	0.96879	0.0555016	1.03922	23.9515	24.5072	24.1295	23.942	24.6886	24.9013	24.8393	24.9633	24.5996	24.2486	24.8009	24.5585	25.7353	24.3712			biological regulation;cell death;cellular component movement;cellular component organization;cellular membrane organization;cellular process;cytoskeleton organization;death;endocytosis;establishment of localization;membrane invagination;membrane organization;organelle organization;response to stimulus;signal transduction;transport;vesicle-mediated transport	cell part;cytoplasm;cytoskeleton;intracellular non-membrane-bounded organelle;intracellular organelle;macromolecular complex;membrane;organelle;plasma membrane;protein complex	Bacterial invasion of epithelial cells;Chemokine signaling pathway;Shigellosis	DUF3361;ELMO_CED12	9	4	4	14.4	9.2	9.2	83.935	0	7.5179	10	10093000	17509000	11184000	9962800	9076100
Q8C754	Vacuolar protein sorting-associated protein 52 homolog	Vps52	0.00219299	0.344571	-0.510211	0.70212	0.882996	1	-0.0333462	0.977151	0.0297439	0.478588	0.476865	1.39172	26.6604	27.0011	26.953	26.5699	27.4365	27.1821	27.3131	27.3839	27.216	27.0851	26.7831	26.6768	27.3081	26.2943			anatomical structure development;cell differentiation;cellular process;developmental process;establishment of localization;protein transport;transport	cell part;Golgi apparatus;intracellular membrane-bounded organelle;intracellular organelle;membrane;organelle		Vps52	13	13	13	20.3	20.3	20.3	82.043	0	29.309	51	107960000	142220000	92731000	98522000	46176000
P62627	Dynein light chain roadblock-type 1	Dynlrb1	0.00226165	0.239661	-0.680206	0.624076	0.382269	1	1.29365	2.45147	0.145828	0.446136	1.97385	3.92816	25.1144	24.9587	24.9996	25.424	25.962	26.0547	25.726	25.7943	25.4849	25.6111	19	24.4661	25.0039	25.0715			behavior;establishment of localization;multicellular organismal process;response to abiotic stimulus;response to stimulus;transport	cell part;centrosome;cytoplasm;intracellular non-membrane-bounded organelle;intracellular organelle;macromolecular complex;membrane;microtubule organizing center;organelle;protein complex		Robl_LC7	3	3	3	38.5	38.5	38.5	10.99	0	6.9041	15	45988000	24378000	24639000	56105000	21567000
Q9EQU5	Protein SET	Set	0.00265853	0.208727	-1.22172	0.428772	0.172753	0.738518	-1.0846	0.471524	0.823168	0.947276	0.137119	1.09971	24.7589	25.0773	25.1137	26.0969	26.6118	26.6971	26.2745	26.4624	26.3712	26.813	24.8502	25.1933	26.8185	28.0564			biological regulation;cellular component assembly;cellular component organization;cellular macromolecular complex assembly;cellular process;chromatin organization;chromosome organization;macromolecular complex assembly;organelle organization	cell part;cytoplasm;cytosol;endoplasmic reticulum;intracellular membrane-bounded organelle;intracellular organelle;macromolecular complex;nucleoplasm;nucleus;organelle;protein complex		NAP	4	4	4	15.6	15.6	15.6	33.377	0	10.71	10	10041000	11156000	10911000	59441000	47146000
O54784	Death-associated protein kinase 3	Dapk3	0.00270947	0.254841	-0.656562	0.634388	0.511387	1	0.829012	1.77647	0.196648	0.499942	1.48557	2.80028	23.8647	23.8292	24.4026	23.964	24.8039	24.8035	24.7708	24.4323	24.5479	24.6342	24.1903	24.0659	24.0401	19			biological regulation;biosynthetic process;cell death;cell differentiation;cellular component organization;cellular metabolic process;cellular nitrogen compound metabolic process;cellular process;chromatin modification;chromatin organization;chromosome organization;death;developmental process;macromolecule metabolic process;macromolecule modification;metabolic process;nitrogen compound metabolic …	cell part;cytoplasm;intracellular membrane-bounded organelle;intracellular organelle;microtubule organizing center;nucleus;organelle;vesicle	Bladder cancer;Pathways in cancer	Pkinase	3	3	3	7.4	7.4	7.4	51.421	0.00071556	3.8905	14	27121000	10606000	29955000	4981600	4921300
Q6PDG5	SWI/SNF complex subunit SMARCC2	Smarcc2	0.002848	0.275949	-0.627232	0.647417	0.305383	1	-0.109697	0.926783	0.00645405	0.409361	0.517535	1.43151	25.9919	25.8502	25.7711	25.9349	26.5362	26.6589	26.8158	26.4448	26.1156	26.2879	25.9797	26.0049	25.8567	25.8544			anatomical structure development;anatomical structure morphogenesis;biological regulation;biosynthetic process;cellular component disassembly;cellular component organization;cellular metabolic process;cellular nitrogen compound metabolic process;cellular process;chromatin modification;chromatin organization;chromosome organization;developmental process;DNA metabolic process;DNA packaging;macromol…	cell part;chromatin remodeling complex;chromosome;intracellular;intracellular membrane-bounded organelle;intracellular non-membrane-bounded organelle;intracellular organelle;macromolecular complex;nucleoplasm;nucleus;organelle;protein complex;transcriptional repressor complex		Myb_DNA-binding;SWIRM	7	7	7	7.1	7.1	7.1	132.6	0	10.874	32	85781000	80752000	61035000	80577000	16394000
Q7TPV4	Myb-binding protein 1A	Mybbp1a	0.00288648	0.351122	0.51499	1.42898	0.995123	0.998119	0.000781918	1.00054	0.00735666	0.417789	-0.514208	0.700177	26.7275	26.8829	26.7622	26.7771	25.9647	26.3888	26.1259	26.3873	26.4954	26.4439	26.6986	26.8915	26.8186	27.0806			biological regulation;biosynthetic process;cell communication;cell differentiation;cellular metabolic process;cellular nitrogen compound metabolic process;cellular process;developmental process;establishment of localization;generation of precursor metabolites and energy;macromolecule metabolic process;metabolic process;nitrogen compound metabolic process;nuclear transport;nucleobase-containing co…	cell part;cytoplasm;intracellular membrane-bounded organelle;intracellular non-membrane-bounded organelle;intracellular organelle;macromolecular complex;membrane;nucleocytoplasmic shuttling complex;nucleolus;nucleus;organelle;protein complex		DNA_pol_phi	11	11	11	9.7	9.7	9.7	152.04	0	36.054	52	123090000	146040000	104510000	112840000	11856000
Q62376	U1 small nuclear ribonucleoprotein 70 kDa	Snrnp70	0.00289458	0.306698	0.600427	1.51616	0.00161696	0.308114	0.740096	1.67029	0.319519	0.87044	0.139669	1.10165	28.2301	27.8214	27.7381	27.9621	27.5068	27.457	27.0251	27.3404	27.3583	27.1318	27.5804	27.1995	26.9939	27.0837			biological regulation;cellular metabolic process;cellular nitrogen compound metabolic process;cellular process;macromolecule metabolic process;metabolic process;mRNA metabolic process;mRNA processing;nitrogen compound metabolic process;nucleobase-containing compound metabolic process;primary metabolic process;RNA metabolic process;RNA processing;RNA splicing	cell part;intracellular membrane-bounded organelle;intracellular organelle;macromolecular complex;nucleoplasm;nucleus;organelle;ribonucleoprotein complex;small nuclear ribonucleoprotein complex;spliceosomal complex	Spliceosome	RRM_1;U1snRNP70_N	10	10	10	25.2	25.2	25.2	51.991	0	24.365	46	331170000	326400000	193690000	295180000	34346000
Q8K221	Arfaptin-2	Arfip2	0.00314427	0.193806	1.42168	2.67897	0.0432268	0.621667	0.707266	1.63271	0.0574379	0.461906	-0.71441	0.609454	23.6166	23.945	24.4352	24.3131	22.4211	22.9619	21.888	22.6671	23.3411	23.4529	22.7254	23.3203	23.3185	24.0341			biological regulation;cellular component organization;cellular process;cytoskeleton organization;organelle organization;regulation of organelle organization	cell cortex;cell part;cell projection;cytoplasm;membrane		Arfaptin	2	2	2	7.9	7.9	7.9	37.772	0.0010631	3.7673	6	16273000	14504000	18947000	18443000	1449700
Q8R071	Inositol-trisphosphate 3-kinase A	Itpka	0.0036085	0.661946	-0.18089	0.882158	0.981244	0.999265	-0.0046937	0.996752	0.33153	0.852216	0.176197	1.1299	31.0477	30.9788	31.1322	31.0682	31.3367	31.1972	31.2298	31.25	31.1743	31.3422	31.1362	31.1491	30.4067	31.2728			alcohol metabolic process;biological regulation;carbohydrate metabolic process;cell activation;cell differentiation;cellular component organization;cellular metabolic process;cellular process;cytoskeleton organization;developmental process;immune system process;metabolic process;organelle organization;primary metabolic process;response to stimulus;signal transduction;small molecule metabolic proc…	cell part;cell projection;neuron projection	Calcium signaling pathway;Inositol phosphate metabolism;Phosphatidylinositol signaling system	IPK	27	27	27	71.5	71.5	71.5	50.934	0	323.31	459	2392800000	2118500000	2318900000	2473800000	660330000
Q9ESN9	C-Jun-amino-terminal kinase-interacting protein 3	Mapk8ip3	0.00364135	0.421371	-0.441062	0.736592	0.688402	1	-0.0836699	0.943654	0.0529562	0.567119	0.357393	1.28111	25.9911	26.424	26.4604	26.4049	26.6882	26.8621	26.7648	26.7843	26.7065	26.495	25.9591	26.3483	26.9118	26.3047			anatomical structure development;anatomical structure morphogenesis;biological regulation;cellular metabolic process;cellular process;developmental process;embryo development;establishment of localization;localization;locomotion;macromolecule metabolic process;macromolecule modification;metabolic process;multicellular organismal process;phosphorus metabolic process;post-embryonic development;prim…	cell part;cell projection;cytoplasm;cytoplasmic membrane-bounded vesicle;endoplasmic reticulum;intracellular membrane-bounded organelle;intracellular organelle;membrane;neuron projection;organelle;plasma membrane;site of polarized growth;vesicle	MAPK signaling pathway	Jnk-SapK_ap_N	9	9	8	10.7	10.7	10	147.56	0	22.645	45	66360000	80700000	80616000	83347000	34151000
Q80TK0	AP2-interacting clathrin-endocytosis protein	Kiaa1107	0.00390193	0.215373	0.814347	1.7585	0.271445	1	0.243511	1.18387	0.0392382	0.465145	-0.570835	0.673227	25.0001	25.368	25.1035	25.1007	23.9629	24.1769	24.3372	24.2544	24.9122	24.4432	25.3318	25.2482	24.7797	24.695						DUF4596	4	4	4	5.2	5.2	5.2	134.06	0.00072359	4.0686	7	28842000	31128000	30800000	35415000	1560900
Q52KI8	Serine/arginine repetitive matrix protein 1	Srrm1	0.00403127	0.595886	0.214462	1.16027	0.0208266	0.889152	0.293877	1.22593	0.424064	0.922006	0.0794151	1.05659	28.2744	28.2374	28.3277	28.3476	28.0596	28.1277	28.0421	28.2108	27.9715	27.9742	28.1694	28.2061	27.7406	27.9243			cellular metabolic process;cellular nitrogen compound metabolic process;cellular process;macromolecule metabolic process;metabolic process;mRNA metabolic process;mRNA processing;nitrogen compound metabolic process;nucleobase-containing compound metabolic process;primary metabolic process;RNA metabolic process;RNA processing;RNA splicing	cell part;macromolecular complex;ribonucleoprotein complex;spliceosomal complex	mRNA surveillance pathway;RNA transport	PWI	11	11	11	14.8	14.8	14.8	106.86	0	69.581	91	393810000	332420000	289840000	402980000	68990000
P63089	Pleiotrophin	Ptn	0.00420821	0.303632	0.631007	1.54865	0.0057553	0.455526	0.594054	1.50948	0.804467	0.969963	-0.0369526	0.974712	29.6496	29.2722	29.7927	29.6448	28.863	29.1929	28.6122	29.0284	29.0976	28.9166	29.2447	29.224	28.729	28.8644			anatomical structure development;behavior;biological regulation;developmental process;multicellular organismal process;neurological system process;response to stimulus	cell part;endoplasmic reticulum;extracellular matrix;intracellular membrane-bounded organelle;intracellular organelle;organelle;proteinaceous extracellular matrix		PTN_MK_C;PTN_MK_N	7	7	7	45.2	45.2	45.2	18.869	0	30.568	95	803030000	675140000	921890000	1014800000	107290000
E9Q411	Neuroblastoma-amplified sequence	Nbas	0.00421196	0.426175	-0.403767	0.755882	0.321378	1	-0.131845	0.912663	0.064084	0.670944	0.271922	1.20741	24.5824	24.6471	24.7835	24.5536	25.1447	25.1167	25.0466	25.1658	24.7533	24.5987	24.5281	24.8215	24.8116	25.1075			biological regulation;catabolic process;cellular metabolic process;cellular nitrogen compound metabolic process;cellular process;establishment of localization;Golgi vesicle transport;macromolecule metabolic process;metabolic process;mRNA metabolic process;nitrogen compound metabolic process;nucleobase-containing compound metabolic process;primary metabolic process;RNA catabolic process;RNA metabo…	cell part;cytoplasm;Golgi apparatus;intracellular membrane-bounded organelle;intracellular non-membrane-bounded organelle;intracellular organelle;membrane;nucleolus;organelle		Nbas_N;Sec39	3	3	3	1.9	1.9	1.9	265.77	0.001037	3.4278	2	14601000	30808000	18137000	13971000	6092900
A2AG50	MAP7 domain-containing protein 2	Map7d2	0.00423619	0.478476	0.308728	1.23862	0.0475459	0.930475	0.308482	1.2384	0.998451	0.999485	-0.000246429	0.999829	27.587	27.4073	27.4748	27.5591	27.0617	27.2606	27.3142	27.0578	27.2973	26.9943	27.2377	27.3211	26.9215	27.5181			cellular component organization;cellular process;cytoskeleton organization;organelle organization	cell part;cytoplasm;cytoskeleton;intracellular non-membrane-bounded organelle;intracellular organelle;macromolecular complex;organelle;protein complex		MAP7	9	9	9	13.4	13.4	13.4	86.049	0	21.207	57	192850000	194640000	205600000	250400000	61318000
Q80U19	Disheveled-associated activator of morphogenesis 2	Daam2	0.0043569	0.3736	-0.526601	0.694189	0.131047	0.975045	-0.375431	0.770875	0.453309	0.881844	0.15117	1.11047	26.6023	26.6881	26.9928	26.5059	27.3253	27.0564	27.1447	27.4748	27.118	27.3378	26.6557	26.7148	27.567	27.0882			cellular component organization;cellular process;cytoskeleton organization;developmental process;organelle organization	extracellular organelle;organelle;vesicle	Wnt signaling pathway	Drf_FH3;Drf_GBD;FH2	16	16	14	18.6	18.6	16.7	128.37	0	30.868	59	108420000	117180000	119810000	94020000	37024000
Q3UL36	Arginine and glutamate-rich protein 1	Arglu1	0.00456707	0.197209	1.00181	2.00251	0.185485	0.982325	0.434389	1.35134	0.109333	0.526567	-0.567419	0.674823	28.9313	28.4612	28.4694	28.5181	27.1959	27.8925	27.0351	27.9484	27.8941	28.0051	28.7989	28.1214	27.3568	28.5207				cell part;intracellular membrane-bounded organelle;intracellular organelle;mitochondrion;nucleoplasm;organelle			5	5	5	14	14	14	32.887	0	6.3576	28	503770000	467150000	397720000	474960000	22282000
P42932	T-complex protein 1 subunit theta	Cct8	0.00489783	0.549317	-0.246781	0.842775	0.759602	1	0.0255183	1.01785	0.00919132	0.574295	0.272299	1.20773	28.6544	28.7828	28.8031	28.6918	29.0322	29.1079	28.9454	28.983	28.8306	28.7264	28.4986	28.6658	28.9014	28.7452			cell recognition;cellular component assembly;cellular component organization;cellular metabolic process;cellular process;macromolecule metabolic process;metabolic process;primary metabolic process;protein folding;protein metabolic process	cell body;cell part;centrosome;cytoplasm;cytoskeleton;cytosol;extracellular organelle;intracellular non-membrane-bounded organelle;intracellular organelle;macromolecular complex;microtubule organizing center;organelle;protein complex;vesicle		Cpn60_TCP1	24	24	24	42.9	42.9	42.9	59.555	0	54.059	151	405700000	477030000	386100000	455060000	149940000
P18052	Receptor-type tyrosine-protein phosphatase alpha	Ptpra	0.00499802	0.102857	4.32366	20.0241	0.359481	1	0.221919	1.16628	0.0025866	0.0810909	-4.10175	0.0582441	24.5884	23.8746	24.4153	24.1707	19	19	19	19	23.6931	23.8226	23.8667	23.805	24.0546	24.6529			biological regulation;cellular metabolic process;cellular process;macromolecule metabolic process;macromolecule modification;metabolic process;phosphorus metabolic process;primary metabolic process;protein metabolic process;protein modification process;protein phosphorylation;response to chemical stimulus;response to endogenous stimulus;response to stimulus;signal transduction	cell part;extracellular organelle;macromolecular complex;organelle;protein complex;receptor complex;vesicle		Y_phosphatase	3	3	3	4.7	4.7	4.7	93.696	0.0010033	3.0745	8	26965000	22589000	11010000	27216000	2976200
Q9Z1S3	RAS guanyl-releasing protein 1	Rasgrp1	0.00502033	0.419925	-0.417115	0.748921	0.89841	1	-0.0240483	0.983469	0.0366963	0.525091	0.393066	1.31318	28.1301	27.9137	28.2063	27.8312	28.531	28.3419	28.6288	28.3619	28.3236	28.3141	28.3086	27.9557	27.5302	28.1133			biological regulation;cell activation;cell differentiation;cellular component movement;cellular localization;cellular process;cytokine production;cytoskeleton-dependent intracellular transport;developmental process;establishment of localization;exocytosis;immune system process;localization;multicellular organismal process;organelle localization;regulation of protein modification process;response …	cell part;cytosol;Golgi apparatus;intracellular membrane-bounded organelle;intracellular organelle;lysosome;membrane;organelle;plasma membrane;vacuole	MAPK signaling pathway;T cell receptor signaling pathway	C1_1;EF-hand_7;RasGEF;RasGEF_N	15	15	15	27.7	27.7	27.7	90.303	0	34.418	79	391910000	328610000	315620000	237920000	77814000
P11627	Neural cell adhesion molecule L1	L1cam	0.00507222	0.0945455	3.29566	9.81955	0.151446	0.661344	1.72388	3.30323	0.218337	0.507361	-1.57178	0.336393	22.7747	22.7228	23.1339	23.402	19	19	19	19	22.5634	19	22.9673	22.9446	22.5105	19			biological adhesion;biological regulation;cell adhesion;cellular component organization;cellular process;locomotion;response to chemical stimulus;response to external stimulus;response to stimulus;signal transduction	cell part;cell surface;membrane;plasma membrane		Bravo_FIGEY;fn3;I-set	2	2	2	1.6	1.6	1.6	140.97	0.0058229	2.2133	6	5617600	5675300	6773200	13206000	1865300
P84228	Histone H3.2	H3c3	0.00508658	0.103333	5.12755	34.9581	0.0413879	0.305375	3.7415	13.3753	0.121326	0.453644	-1.38605	0.382611	21.3649	25.8077	23.2069	27.7542	19	19	19	20.4202	19.6091	19	19	21.8719	22.5469	21.5408			biological regulation;cellular process;gene silencing;regulation of gene expression, epigenetic	cell part;extracellular organelle;macromolecular complex;nucleoplasm;nucleosome;organelle;vesicle	Systemic lupus erythematosus	Histone	10	2	1	58.8	30.1	23.5	15.388	0	214.18	6	10254000	50187000	63726000	182390000	1203600
Q8K3I4	Rab effector MyRIP	Myrip	0.00524704	0.207314	1.33871	2.52926	0.473326	1	0.182056	1.1345	0.0107486	0.31687	-1.15666	0.44855	23.8934	24.2964	24.1453	24.2646	22.6351	22.2284	22.601	22.6773	23.9142	23.7179	24.095	24.2599	23.3269	24.4397			biological regulation;cellular component movement;cellular localization;cellular process;establishment of localization;localization;organelle localization;protein transport;regulation of transport;transport	cell part;cell projection;cilium;cytoplasmic membrane-bounded vesicle;cytoskeleton;intracellular membrane-bounded organelle;intracellular non-membrane-bounded organelle;intracellular organelle;macromolecular complex;organelle;protein complex;synapse;vesicle		Rab_eff_C	2	2	2	2.3	2.3	2.3	94.923	0.00099174	2.9184	6	16563000	21980000	11975000	13780000	1340400
Q80WQ2	Protein VAC14 homolog	Vac14	0.00525495	0.100889	3.78716	13.8054	0.374873	1	0.98748	1.98272	0.0530448	0.336754	-2.79969	0.143619	23.5865	23.4879	23.3944	24.0022	19	19	19	19	23.1529	23.423	23.8446	23.2463	23.6373	19			biological regulation;response to abiotic stimulus;response to osmotic stress;response to stimulus;response to stress	cell part;endoplasmic reticulum;intracellular membrane-bounded organelle;intracellular organelle;macromolecular complex;membrane;organelle;protein complex		Vac14_Fig4_bd	2	2	2	2.9	2.9	2.9	88.047	0.0046598	2.3204	3	10084000	9198800	7763200	11795000	0
Q6PEE2	CBP80/20-dependent translation initiation factor	Ctif	0.00529042	0.393078	-0.511362	0.70156	0.382796	1	-0.307162	0.80823	0.485267	0.870377	0.2042	1.15205	22.2633	22.8144	22.3837	22.6792	23.0851	22.8924	23.0972	22.9552	23.2028	22.7921	22.5018	22.9771	23.7852	22.1555			biological regulation;catabolic process;cellular metabolic process;cellular nitrogen compound metabolic process;cellular process;macromolecule metabolic process;metabolic process;mRNA metabolic process;nitrogen compound metabolic process;nucleobase-containing compound metabolic process;primary metabolic process;regulation of translation;RNA catabolic process;RNA metabolic process	cell part;cytoplasm		MIF4G	3	3	3	4.7	4.7	4.7	67.83	0.0010541	3.6453	5	1886600	6212200	6364700	2895100	3189600
Q9CQS8;E9PW43	Protein transport protein Sec61 subunit beta	Sec61b	0.00531705	0.239228	0.788628	1.72743	0.053312	0.835875	0.374868	1.29672	0.0765399	0.560141	-0.41376	0.750664	26.9175	26.4906	26.6828	26.6414	25.5799	25.7541	25.6999	25.946	26.4924	26.4232	26.4904	26.1734	25.8848	26.5693			catabolic process;cellular metabolic process;cellular process;establishment of localization;macromolecule metabolic process;metabolic process;primary metabolic process;protein metabolic process;protein transport;proteolysis;proteolysis involved in cellular protein catabolic process;transport	cell part;endoplasmic reticulum;intracellular membrane-bounded organelle;intracellular organelle;macromolecular complex;membrane;organelle;protein complex;Sec61 translocon complex	Phagosome;Protein export;Protein processing in endoplasmic reticulum;Vibrio cholerae infection	Sec61_beta	4	4	4	41.7	41.7	41.7	9.9583	0	9.4806	16	121780000	95558000	121110000	110460000	10686000
Q80UK0	SEC14 domain and spectrin repeat-containing protein 1	Sestd1	0.00537458	0.425	0.461764	1.37722	0.20878	1	0.252701	1.19144	0.23746	0.801258	-0.209063	0.865099	25.7465	26.0988	25.8913	25.701	25.3393	25.2798	25.5407	25.2196	25.6087	25.4845	26.0633	25.6621	25.1671	25.6565				cell part;macromolecular complex;protein complex		CRAL_TRIO_2	5	5	5	7.3	7.3	7.3	79.375	0	12.775	18	65563000	76031000	58862000	59211000	5789100
Q9Z0R9	Acyl-CoA 6-desaturase	Fads2	0.00561702	0.443359	-0.393064	0.761511	0.240495	1	-0.326966	0.797211	0.780588	0.95538	0.066098	1.04688	22.917	23.2482	23.1338	23.0911	23.7427	23.4898	23.502	23.3537	23.3647	23.4646	23.2943	22.7295	24.086	23.5479			biosynthetic process;cellular ketone metabolic process;cellular lipid metabolic process;cellular metabolic process;cellular process;lipid metabolic process;metabolic process;organic acid metabolic process;primary metabolic process;small molecule metabolic process	cell part;membrane	alpha-Linolenic acid metabolism;Biosynthesis of unsaturated fatty acids;PPAR signaling pathway	Cyt-b5;FA_desaturase	2	2	2	5.4	5.4	5.4	52.387	0	4.9479	5	7523700	10132000	8533900	8483200	4082800
Q9CY64	Biliverdin reductase A	Blvra	0.00569146	0.341849	-0.594531	0.66226	0.19872	1	-0.265666	0.831815	0.131663	0.671006	0.328865	1.25602	27.3627	27.5412	27.2622	27.1987	28.2665	28.0348	27.948	27.9048	27.5245	27.8139	27.2969	27.5728	28.0806	27.2702			catabolic process;cellular metabolic process;cellular nitrogen compound metabolic process;cellular process;cofactor metabolic process;heterocycle metabolic process;metabolic process;nitrogen compound metabolic process;pigment metabolic process	cell part;cytoplasm;extracellular organelle;organelle;vesicle	Porphyrin and chlorophyll metabolism	Biliv-reduc_cat;GFO_IDH_MocA	9	9	9	38.6	38.6	38.6	33.524	0	66.453	63	97269000	123720000	132530000	153640000	98355000
Q91Z53	Glyoxylate reductase/hydroxypyruvate reductase	Grhpr	0.0058877	0.545235	-0.250724	0.840474	0.547332	1	-0.0856657	0.94235	0.245085	0.847198	0.165059	1.12121	27.7356	27.6767	27.6994	27.6973	28.0187	28.1301	27.9367	27.8602	27.8193	27.9461	27.6143	27.6215	28.1825	27.5752			cellular component assembly;cellular component organization;cellular ketone metabolic process;cellular metabolic process;cellular process;establishment of localization;excretion;macromolecular complex assembly;metabolic process;multicellular organismal process;organic acid metabolic process;protein complex assembly;secretion;small molecule metabolic process;transport	cell part;cytoplasm;cytosol;extracellular organelle;organelle;vesicle	Glyoxylate and dicarboxylate metabolism;Pyruvate metabolism	2-Hacid_dh;2-Hacid_dh_C	8	8	8	28.4	28.4	28.4	35.328	0	87.698	70	237870000	244290000	213450000	243450000	49440000
P61164	Alpha-centractin	Actr1a	0.00597774	0.301278	-0.640619	0.641438	0.496971	1	-0.13391	0.911358	0.0227515	0.464274	0.506709	1.42081	26.4398	26.6818	26.35	26.8544	27.3166	27.1561	27.4249	27.4086	26.8043	26.5298	26.3335	26.8455	27.1492	26.7188				cell part;centrosome;cytoplasm;extracellular organelle;intracellular non-membrane-bounded organelle;intracellular organelle;macromolecular complex;microtubule organizing center;organelle;protein complex;vesicle		Actin	11	4	4	41	17.3	17.3	42.613	0	41.383	47	88978000	106420000	48946000	117890000	47149000
Q62245	Son of sevenless homolog 1	Sos1	0.00603609	0.09	5.41263	42.5955	0.808495	1	0.127654	1.09252	0.00274087	0.0768889	-5.28498	0.0256486	25.3363	26.5119	24.7079	25.8669	19	19	19	19	24.9655	26.3185	25.2843	24.7689	24.8079	26.2108			biological regulation;cellular process;homeostatic process;immune system process;response to stimulus;signal transduction	cell body;cell part;cytosol;membrane;neuronal cell body;plasma membrane	Acute myeloid leukemia;B cell receptor signaling pathway;Chemokine signaling pathway;Chronic myeloid leukemia;Dorso-ventral axis formation;Endometrial cancer;ErbB signaling pathway;Fc epsilon RI signaling pathway;Focal adhesion;Gap junction;Glioma;GnRH signaling pathway;Hepatitis C;Insulin signaling pathway;Jak-STAT signaling pathway;MAPK signaling pathway;MAPK signaling pathway - fly;Natural kil…	Histone;PH;RasGEF;RasGEF_N;RhoGEF	4	4	4	4	4	4	150.88	0	6.1742	5	45899000	78403000	26832000	50516000	1458400
Q8BHH2	Ras-related protein Rab-9B	Rab9b	0.00608161	0.08	3.61768	12.2753	0.00895457	0.232267	3.56331	11.8213	0.965014	0.988346	-0.0543686	0.963016	23.4717	23.2736	23.4904	23.5226	19	19	19	19	23.1096	19	19	19	23.3814	19			biological regulation;cellular process;endosome transport;establishment of localization;metabolic process;protein transport;response to stimulus;signal transduction;transport;vesicle-mediated transport	cell part;cytoplasmic membrane-bounded vesicle;endosome;intracellular membrane-bounded organelle;intracellular organelle;lysosome;membrane;organelle;plasma membrane;vacuole;vesicle	Measles	Ras	2	2	2	19.4	19.4	19.4	22.704	0.0010235	3.2949	5	4307400	15187000	19344000	17785000	0
Q9CZ42	ATP-dependent (S)-NAD(P)H-hydrate dehydratase	Naxd	0.00610213	0.463171	-0.337093	0.791635	0.39811	1	-0.114016	0.924012	0.134535	0.747572	0.223077	1.16722	23.2677	23.3462	23.3438	23.3362	23.9277	23.6572	23.46	23.6264	23.6316	23.6049	23.1737	23.2274	23.4223	23.7593			cellular metabolic process;cellular nitrogen compound metabolic process;cellular process;cofactor metabolic process;heterocycle metabolic process;metabolic process;nitrogen compound metabolic process;nucleobase-containing compound metabolic process;nucleobase-containing small molecule metabolic process;nucleotide metabolic process;primary metabolic process;small molecule metabolic process	cell part;intracellular membrane-bounded organelle;intracellular organelle;mitochondrion;organelle		Carb_kinase	2	2	2	10.2	10.2	10.2	36.717	0.001032	3.379	5	5191100	5850800	13581000	14426000	2099100
Q9Z2X8	Kelch-like ECH-associated protein 1	Keap1	0.00638133	0.0996	4.30083	19.7097	0.224763	1	0.236749	1.17833	0.00358015	0.1032	-4.06409	0.0597845	24.2095	24.2024	24.4475	24.2919	19	19	19	19	23.9349	24.06	23.9748	23.6278	24.5679	24.0248			biological regulation;biosynthetic process;cellular component organization;cellular metabolic process;cellular nitrogen compound metabolic process;cellular process;developmental process;embryo development;macromolecule metabolic process;macromolecule modification;metabolic process;mitochondrion organization;nitrogen compound metabolic process;nucleobase-containing compound metabolic process;organ…	cell part;cytoplasm;endoplasmic reticulum;intracellular membrane-bounded organelle;intracellular organelle;macromolecular complex;microtubule organizing center;midbody;mitochondrion;nucleoplasm;organelle;protein complex;ubiquitin ligase complex	Ubiquitin mediated proteolysis	BACK;BTB;Kelch_1	4	4	4	7.1	7.1	7.1	69.552	0.0003701	4.3949	5	17704000	20135000	17038000	30485000	2742500
Q5SYD0	Unconventional myosin-Id	Myo1d	0.00638577	0.442472	-0.392058	0.762042	0.122718	0.930691	-0.402922	0.756325	0.959419	0.994334	-0.0108643	0.992498	29.7889	30.0996	29.9636	30.089	30.2519	30.3378	30.3561	30.6498	30.2912	30.4057	30.0219	29.968	31.047	30.4984			biological adhesion;biological regulation;cell adhesion;cell motility;cellular component movement;cellular component organization;cellular localization;cellular membrane organization;cellular process;endocytosis;establishment of localization;exocytosis;immune system process;localization;locomotion;membrane invagination;membrane organization;metabolic process;response to stimulus;secretion;transpo…	brush border;cell body;cell part;cell projection;endoplasmic reticulum;endosome;extracellular organelle;filopodium;intracellular membrane-bounded organelle;intracellular organelle;macromolecular complex;membrane;microvillus;neuron projection;neuronal cell body;organelle;plasma membrane;protein complex;vesicle		IQ;Myosin_head;Myosin_TH1	43	43	43	46.3	46.3	46.3	116.08	0	218.14	310	891500000	1215300000	963730000	1189400000	251260000
O54941	SWI/SNF-related matrix-associated actin-dependent regulator of chromatin subfamily E member 1	Smarce1	0.0067029	0.680251	-0.174177	0.886273	0.118312	1	-0.163488	0.892864	0.891638	0.988154	0.0106899	1.00744	24.082	24.2565	24.1534	24.0558	24.3218	24.3303	24.3273	24.346	24.2303	24.3746	24.4791	24.3324	24.0396	24.2765			anatomical structure development;biological regulation;cellular component disassembly;cellular component organization;cellular process;chromatin modification;chromatin organization;chromosome organization;developmental process;metabolic process;organelle organization	cell part;chromatin remodeling complex;intracellular membrane-bounded organelle;intracellular organelle;macromolecular complex;nucleoplasm;nucleus;organelle;protein complex;transcriptional repressor complex		HMG_box	4	3	3	11.4	9.7	9.7	46.638	0	9.6726	15	21487000	20500000	18360000	18205000	4487400
Q9QZ88	Vacuolar protein sorting-associated protein 29	Vps29	0.00671944	0.246984	-0.78732	0.579419	0.169315	1	-0.208709	0.865311	0.0166213	0.41395	0.578611	1.49341	25.943	26.0824	25.8851	26.3166	27.198	27.151	26.8572	26.7423	26.2719	26.5088	26.2982	25.9571	26.3867	26.1766			cellular process;endosome transport;establishment of localization;Golgi vesicle transport;protein transport;transport;vacuolar transport;vesicle-mediated transport	cell part;cytoplasm;endosome;extracellular organelle;intracellular membrane-bounded organelle;intracellular organelle;macromolecular complex;membrane;organelle;protein complex;retromer complex;vesicle		Metallophos_2	4	4	4	24.2	24.2	24.2	20.495	0	10.886	42	70989000	104150000	74281000	108510000	23336000
Q9CZN7	Serine hydroxymethyltransferase, mitochondrial	Shmt2	0.00684776	0.091	4.11905	17.3763	0.502346	1	0.861845	1.81736	0.0534491	0.322909	-3.2572	0.104589	24.2437	24.1125	24.0229	23.9305	19	19	19	19	23.7918	25.0068	24.0244	19	24.2637	23.783			amine metabolic process;biological regulation;biosynthetic process;cellular amino acid metabolic process;cellular aromatic compound metabolic process;cellular component assembly;cellular component organization;cellular ketone metabolic process;cellular metabolic process;cellular nitrogen compound metabolic process;cellular process;cofactor metabolic process;heterocycle metabolic process;macromole…	cell part;cytoskeleton;extracellular organelle;intracellular membrane-bounded organelle;intracellular non-membrane-bounded organelle;intracellular organelle;membrane;mitochondrion;organelle;vesicle	Cyanoamino acid metabolism;Glycine, serine and threonine metabolism;Methane metabolism;One carbon pool by folate	SHMT	2	2	2	4.4	4.4	4.4	55.758	0.0077496	1.9809	1	22588000	20547000	16881000	17108000	1669600
P0C192	Leucine-rich repeat-containing protein 4B	Lrrc4b	0.00694282	0.0837333	3.91768	15.1126	0.32809	0.984441	1.114	2.16446	0.0641872	0.364462	-2.80368	0.143222	23.8111	23.9582	23.8829	23.6754	19	19	19	19	23.571	23.8434	23.5823	23.8013	23.3624	19			biological regulation	cell part;cell projection;membrane;neuron projection		I-set;LRR_1;LRR_5;LRR_8;LRRNT	2	2	2	3.8	3.8	3.8	76.155	0	4.8986	5	16710000	18172000	15967000	15205000	1695200
P68368	Tubulin alpha-4A chain	Tuba4a	0.00694818	0.446963	-0.395963	0.759982	0.0697877	0.898058	-0.353719	0.782564	0.80026	0.968272	0.042244	1.02971	33.5932	33.7425	33.867	33.7301	34.3236	34.2051	34.1253	34.1612	33.8307	34.3868	33.8567	33.6701	34.3346	34.1866			cellular component assembly;cellular component organization;cellular macromolecular complex assembly;cellular process;macromolecular complex assembly;protein complex assembly;protein polymerization	cell part;cytoplasm;extracellular organelle;macromolecular complex;organelle;protein complex;vesicle	Gap junction;Pathogenic Escherichia coli infection;Phagosome	Tubulin;Tubulin_C	38	8	8	75	23	23	49.924	0	196.34	302	14019000000	17625000000	16294000000	15483000000	4711600000
Q9Z2C4	Myotubularin-related protein 1	Mtmr1	0.00732523	0.419138	-0.471253	0.721338	0.950227	1	0.0126546	1.00881	0.0348213	0.48072	0.483908	1.39853	27.5226	27.5675	27.8355	27.611	28.2208	28.2593	28.3076	27.8492	27.8901	28.1085	27.4776	27.4982	27.1652	27.858			cellular lipid metabolic process;cellular metabolic process;cellular process;lipid metabolic process;metabolic process;phosphorus metabolic process;primary metabolic process	cell part;cytoplasm;membrane;plasma membrane	Fructose and mannose metabolism	GRAM;Myotub-related	11	11	11	23	23	23	75.313	0	31.822	64	183470000	218290000	227290000	213040000	104750000
Q9CZ04	COP9 signalosome complex subunit 7a	Cops7a	0.0074243	0.0936471	3.79189	13.8507	0.142377	0.641821	2.03656	4.10266	0.245711	0.530404	-1.75533	0.296206	23.3765	23.5215	23.993	23.8423	19	19	19	19	23.4571	19	23.2954	23.4034	23.5349	19			cellular metabolic process;cellular process;macromolecule metabolic process;macromolecule modification;metabolic process;primary metabolic process;protein metabolic process;protein modification by small protein conjugation or removal;protein modification process	cell part;cytoplasm;macromolecular complex;nucleoplasm;protein complex		PCI	2	2	2	8.7	8.7	8.7	30.224	0.00037397	4.5685	6	6584300	14068000	15762000	13697000	2317000
Q8VHJ5	Serine/threonine-protein kinase MARK1	Mark1	0.00750247	0.584685	-0.233631	0.850491	0.0238658	1	-0.213246	0.862594	0.776967	0.975556	0.020385	1.01423	28.061	28.0252	28.1677	27.9471	28.3344	28.2713	28.415	28.2322	28.1666	28.2663	28.3254	28.432	28.1238	28.17			biological regulation;cell motility;cellular component movement;cellular component organization;cellular metabolic process;cellular process;cytoskeleton organization;locomotion;macromolecule metabolic process;macromolecule modification;metabolic process;organelle organization;phosphorus metabolic process;primary metabolic process;protein metabolic process;protein modification process;protein phos…	cell part;cytoplasm;cytoskeleton;intracellular non-membrane-bounded organelle;intracellular organelle;membrane;organelle;plasma membrane		KA1;Pkinase	27	17	17	41.6	28.4	28.4	88.334	0	47.92	95	292220000	312240000	289970000	283370000	75873000
Q8K019	Bcl-2-associated transcription factor 1	Bclaf1	0.00753433	0.373873	0.567189	1.48163	0.367109	1	0.220837	1.16541	0.16921	0.680319	-0.346352	0.786571	29.881	29.5249	29.6897	29.6665	29.0047	28.7275	29.1722	29.2631	29.4492	28.9208	29.8375	29.6985	29.084	29.8076			biological regulation;biosynthetic process;cell death;cellular metabolic process;cellular nitrogen compound metabolic process;cellular process;death;macromolecule metabolic process;metabolic process;nitrogen compound metabolic process;nucleobase-containing compound metabolic process;primary metabolic process;response to stimulus;response to stress;RNA metabolic process	cell part;cytoplasm;intracellular membrane-bounded organelle;intracellular non-membrane-bounded organelle;intracellular organelle;nucleolus;nucleoplasm;nucleus;organelle		THRAP3_BCLAF1	26	25	25	30.4	30.4	30.4	106	0	75.993	206	1069300000	865800000	915760000	817990000	101730000
Q8VCD6	Receptor expression-enhancing protein 2	Reep2	0.00764022	0.0858462	4.67943	25.6241	0.21354	0.737464	1.84321	3.58808	0.111817	0.414286	-2.83622	0.140028	24.2466	25.5419	25.1013	24.1654	19	19	19	19	24.4218	23.2197	19	24.0531	26.042	22.2881			biological regulation;cellular component organization;cellular membrane organization;cellular process;endoplasmic reticulum organization;establishment of localization;membrane organization;multicellular organismal process;neurological system process;organelle organization;protein transport;regulation of transport;transport	cell part;endoplasmic reticulum;extracellular organelle;intracellular membrane-bounded organelle;intracellular organelle;macromolecular complex;membrane;organelle;protein complex;vesicle		TB2_DP1_HVA22	3	3	3	17.3	17.3	17.3	28.436	0	9.1198	5	21529000	22866000	34225000	30406000	0
Q99KR6;Q80SY4	E3 ubiquitin-protein ligase RNF34	Rnf34	0.00822631	0.1295	3.15757	8.92328	0.425597	1	0.775171	1.71139	0.0642172	0.366333	-2.3824	0.19179	22.7727	22.9559	23.0403	22.9121	19	19	19	19	22.8132	19	22.3411	23.4274	23.1569	22.7998			anatomical structure development;anatomical structure formation involved in morphogenesis;anatomical structure morphogenesis;biological regulation;catabolic process;cellular metabolic process;cellular process;developmental process;embryo development;macromolecule metabolic process;macromolecule modification;metabolic process;primary metabolic process;protein metabolic process;protein modification…	cell part;centrosome;cytoplasm;cytosol;endomembrane system;intracellular membrane-bounded organelle;intracellular non-membrane-bounded organelle;intracellular organelle;membrane;microtubule organizing center;nucleus;organelle;plasma membrane;vesicle		Ank;Ank_2;MIB_HERC2;ZZ	2	2	2	6.6	6.6	6.6	42.03	0.00072543	4.0811	5	6903800	8178200	8183100	7904600	0
Q62442	Vesicle-associated membrane protein 1	Vamp1	0.00828275	0.428098	-0.496474	0.708837	0.0668553	0.937678	-0.320593	0.800741	0.186887	0.816505	0.175881	1.12965	25.3085	25.0225	25.4498	25.5691	25.9117	26.0792	25.6162	25.8253	25.7374	25.99	25.4345	25.6422	25.5437	25.68			biological regulation;cellular component assembly;cellular component organization;cellular macromolecular complex assembly;cellular membrane organization;cellular process;establishment of localization;exocytosis;macromolecular complex assembly;membrane fusion;membrane organization;neurotransmitter transport;organelle fusion;organelle organization;protein complex assembly;secretion;transport;vesic…	cell part;cell projection;cell surface;cytoplasmic membrane-bounded vesicle;intracellular membrane-bounded organelle;intracellular organelle;macromolecular complex;membrane;mitochondrion;neuron projection;organelle;protein complex;vesicle	SNARE interactions in vesicular transport	Synaptobrevin	4	2	2	41.5	33.9	33.9	12.89	0	24.509	26	50238000	10779000	50379000	16718000	21717000
O35136	Neural cell adhesion molecule 2	Ncam2	0.00852225	0.414667	-0.466039	0.72395	0.318454	1	-0.150018	0.90124	0.0715974	0.619063	0.316021	1.24489	26.346	26.4647	26.5181	26.2318	26.9351	26.8559	26.9132	27.0969	26.4799	26.1393	26.5451	26.6432	26.5445	26.8287			biological adhesion;cell adhesion;cell recognition;cellular process;multicellular organismal process;neurological system process	cell part;cell projection;membrane;neuron projection;plasma membrane	Cell adhesion molecules (CAMs);Prion diseases	fn3;I-set	8	8	8	13.9	13.9	13.9	93.203	0	18.064	37	101850000	118410000	105290000	93960000	25842000
Q68FL4	Putative adenosylhomocysteinase 3	Ahcyl2	0.00916924	0.465011	-0.37937	0.768773	0.615819	1	0.236493	1.17813	0.16062	0.559439	0.615863	1.53247	27.5679	27.9358	27.7468	27.8797	28.2848	28.3141	28.1429	28.1447	27.923	28.3607	27.6678	27.1832	28.2845	26.2341			amine metabolic process;cellular amino acid metabolic process;cellular ketone metabolic process;cellular metabolic process;cellular nitrogen compound metabolic process;cellular process;cofactor metabolic process;heterocycle metabolic process;metabolic process;nitrogen compound metabolic process;nucleobase-containing compound metabolic process;nucleobase-containing small molecule metabolic process…	cell part;cytosol	Cysteine and methionine metabolism	AdoHcyase;AdoHcyase_NAD	25	11	11	38.3	20.4	20.4	66.899	0	156.37	57	189790000	333650000	235700000	257910000	87333000
Q99J99	3-mercaptopyruvate sulfurtransferase	Mpst	0.00920262	0.09825	4.97211	31.3874	0.346129	0.979819	1.38754	2.61631	0.0714556	0.368831	-3.58458	0.0833556	25.0684	25.3268	25.3035	25.1106	19	19	19	19	25.151	25.1241	24.8644	24.6601	25.4253	19			biosynthetic process;cellular metabolic process;cellular process;metabolic process;sulfur compound metabolic process	cell part;cell projection;cytoplasm;extracellular organelle;intracellular membrane-bounded organelle;intracellular organelle;membrane;mitochondrion;neuron projection;organelle;synapse;vesicle		Rhodanese	5	5	5	20.5	20.5	20.5	33.097	0	8.6283	8	32686000	26659000	44782000	35371000	17937000
O55176	E3 ubiquitin-protein ligase Praja-1	Pja1	0.00950065	0.10419	4.14746	17.7218	0.0575107	0.927591	0.321625	1.24974	0.00627371	0.166261	-3.82583	0.0705196	24.1482	24.1851	24.2226	24.1695	19	19	19	19	24.1694	23.5467	23.9168	23.661	24.2679	23.9062			catabolic process;cellular metabolic process;cellular process;macromolecule metabolic process;macromolecule modification;metabolic process;primary metabolic process;protein catabolic process;protein metabolic process;protein modification by small protein conjugation or removal;protein modification process	cell part;cytoplasm		zf-RING_2	2	2	2	5.4	5.4	5.4	63.905	0.0010256	3.3167	15	15461000	16032000	15303000	15627000	0
D3Z497;Q9WTZ1	RING-type domain-containing protein	Gm7075	0.00963681	0.107368	-4.51129	0.0438498	0.193491	0.733208	-2.16931	0.222317	0.216164	0.495938	2.34198	5.06997	19	19	19	19	24.7001	24.6218	24.5676	24.667	19	24.632	19	19	19	24.2145			biological regulation;catabolic process;cell motility;cellular component movement;cellular component organization;cellular metabolic process;cellular process;locomotion;macromolecule metabolic process;macromolecule modification;metabolic process;mitochondrion organization;organelle organization;primary metabolic process;protein metabolic process;protein modification by small protein conjugation o…	cell part;cytoplasm;intracellular membrane-bounded organelle;intracellular organelle;macromolecular complex;nucleoplasm;nucleus;organelle;protein complex;ubiquitin ligase complex	Ubiquitin mediated proteolysis	zf-rbx1	2	2	2	18.8	18.8	18.8	12.652	0.0063272	2.0822	1	12646000	11787000	11004000	9163400	5273900
Q8VCY8	Phospholipid phosphatase-related protein type 2	Plppr2	0.00969728	0.0886667	-5.32828	0.0248901	0.193336	0.707493	-2.58454	0.166715	0.221811	0.494679	2.74374	6.69804	19	19	19	19	25.6714	25.9208	25.5624	25.4867	19	25.6665	19	25.2562	19	19				cell part		PAP2	2	2	2	12.8	12.8	12.8	36.935	0.00098071	2.7998	4	0	0	0	0	15662000
Q08509	Epidermal growth factor receptor kinase substrate 8	Eps8	0.00974939	0.108	4.32075	19.9836	0.255224	0.797759	1.971	3.9204	0.221408	0.498991	-2.34974	0.196181	24.4512	24.3514	24.3454	24.4661	19	19	19	19	24.4138	24.5118	24.7771	24.8736	19	19			behavior;biological regulation;cell motility;cellular component assembly;cellular component movement;cellular component organization;cellular process;cytoskeleton organization;locomotion;multicellular organismal process;organelle organization;regulation of organelle organization;response to chemical stimulus;response to stimulus;signal transduction	brush border;cell cortex;cell part;cell projection;extracellular organelle;macromolecular complex;microvillus;organelle;protein complex;receptor complex;site of polarized growth;synapse;vesicle		PTB;SH3_1	3	3	3	5.5	5.5	5.5	91.736	0.00037836	4.7132	7	28073000	23823000	16290000	29776000	0
Q5DTX6	Junctional protein associated with coronary artery disease	Jcad	0.00983427	0.195347	1.09166	2.1312	0.663094	1	0.187523	1.13881	0.0785665	0.445045	-0.904142	0.534351	26.8904	26.7455	26.5754	26.6055	25.9195	24.8461	25.7373	25.1937	26.366	26.1738	26.8509	27.202	25.2686	27.0881			biological adhesion;cell adhesion;cellular process			JCAD	15	15	15	14.8	14.8	14.8	144.8	0	23.087	33	105140000	39734000	67937000	106510000	17121000
O35643	AP-1 complex subunit beta-1	Ap1b1	0.00993852	0.345686	0.620851	1.53778	0.0613417	0.805355	0.429575	1.34684	0.358083	0.850322	-0.191276	0.875831	27.7816	27.2485	27.4147	27.4645	27.0833	27.095	26.6672	26.4382	26.9986	27.1079	27.2637	27.0486	26.4959	27.3226			cellular process;establishment of localization;protein transport;transport;vesicle-mediated transport	AP-type membrane coat adaptor complex;cell part;macromolecular complex;membrane;protein complex	Lysosome	Adaptin_N;Alpha_adaptinC2;B2-adapt-app_C	30	6	6	29	8.9	8.9	103.93	0	65.658	29	300030000	168780000	152750000	122320000	28816000
A2AT37	Regulator of nonsense transcripts 2	Upf2	0.0101677	0.103636	-4.449	0.0457843	NaN	1	0	1	0.00421199	0.103294	4.449	21.8416	19	19	19	19	24.2706	25.2104	24.3181	24.4459	19	19	19	19	19	19			anatomical structure development;anatomical structure morphogenesis;catabolic process;cellular metabolic process;cellular nitrogen compound metabolic process;cellular process;developmental process;macromolecule metabolic process;metabolic process;mRNA metabolic process;nitrogen compound metabolic process;nucleobase-containing compound metabolic process;primary metabolic process;response to chemic…	cell part;cytoplasm;intracellular membrane-bounded organelle;intracellular organelle;macromolecular complex;nucleus;organelle;protein complex	mRNA surveillance pathway;RNA transport	MIF4G;Upf2	4	4	4	4.5	4.5	4.5	147.55	0.0022286	2.5409	2	5422100	6282100	4313000	5940100	5325400
Q9QYI4	DnaJ homolog subfamily B member 12	Dnajb12	0.0102358	0.109217	4.31175	19.8594	0.190737	0.724466	2.17344	4.51099	0.24777	0.51687	-2.13831	0.227146	24.4336	24.37	24.4924	24.3174	19	19	19	19	24.4581	19	24.6464	24.0017	24.5015	19				cell part;membrane	Protein processing in endoplasmic reticulum	DnaJ;DUF1977	3	3	3	7.7	7.7	7.7	41.987	0	6.1004	7	28102000	18744000	17702000	17077000	831520
Q64514	Tripeptidyl-peptidase 2	Tpp2	0.0103842	0.455897	-0.368936	0.774353	0.0989977	1	-0.296458	0.814249	0.650065	0.934131	0.0724777	1.05152	27.3218	27.5662	27.5674	27.5061	28.0067	28.026	27.6157	27.9337	27.7146	28.0838	27.6172	27.4383	28.091	27.7039			macromolecule metabolic process;metabolic process;primary metabolic process;protein metabolic process;proteolysis	cell part;cytoplasm;intracellular membrane-bounded organelle;intracellular organelle;nucleoplasm;nucleus;organelle		Peptidase_S8;TPPII	16	16	16	17.2	17.2	17.2	139.88	0	76.363	86	202360000	244980000	185100000	293770000	46274000
Q99JP7	Glutathione hydrolase 7	Ggt7	0.0105491	0.12432	-4.11215	0.0578253	0.0108284	0.223059	-4.15878	0.0559862	0.873282	0.971537	-0.0466301	0.968195	19	19	24.3602	19	24.637	24.4889	24.1168	24.8768	24.1415	24.9554	23.9306	24.1828	25.1902	24.2351			amine metabolic process;biosynthetic process;cellular amino acid metabolic process;cellular ketone metabolic process;cellular metabolic process;cellular nitrogen compound metabolic process;cellular process;metabolic process;nitrogen compound metabolic process;organic acid metabolic process;peptide metabolic process;primary metabolic process;small molecule metabolic process;sulfur compound metabol…	cell part	Arachidonic acid metabolism;Cyanoamino acid metabolism;Glutathione metabolism;Taurine and hypotaurine metabolism	G_glu_transpept	4	4	4	8.3	8.3	8.3	70.251	0	5.0129	6	0	0	20026000	0	2983900
P63017	Heat shock cognate 71 kDa protein	Hspa8	0.0106651	0.713119	0.128901	1.09346	0.000211154	0.987398	0.20272	1.15087	0.0369317	0.909549	0.0738197	1.0525	34.0343	33.9272	33.9353	33.9203	33.8584	33.9086	33.7899	33.769	33.801	33.769	33.7207	33.7947	33.7571	33.7163			biological regulation;biosynthetic process;cellular component disassembly;cellular component organization;cellular metabolic process;cellular nitrogen compound metabolic process;cellular process;macromolecule metabolic process;metabolic process;mRNA metabolic process;mRNA processing;nitrogen compound metabolic process;nucleobase-containing compound metabolic process;primary metabolic process;prot…	cell part;cytoplasmic membrane-bounded vesicle;cytosol;extracellular organelle;extracellular space;intracellular;intracellular membrane-bounded organelle;intracellular non-membrane-bounded organelle;intracellular organelle;macromolecular complex;membrane;nucleolus;nucleus;organelle;plasma membrane;protein complex;ribonucleoprotein complex;spliceosomal complex;ubiquitin ligase complex;vesicle	Antigen processing and presentation;Endocytosis;MAPK signaling pathway;Measles;Protein processing in endoplasmic reticulum;Spliceosome;Toxoplasmosis	HSP70	48	48	33	68.6	68.6	47.5	70.87	0	323.31	1470	17878000000	16700000000	15694000000	16667000000	3836000000
Q8K4J6	Myocardin-related transcription factor A	Mrtfa	0.0106757	0.142222	3.66025	12.6429	0.0661823	0.720094	0.57536	1.49005	0.00994148	0.163429	-3.08489	0.117857	23.2509	23.5088	24.3477	23.1819	19	19	19	19	23.5603	23.0404	22.7375	23.0208	22.8285	23.3576			anatomical structure development;anatomical structure morphogenesis;biological regulation;biosynthetic process;cell activation;cell differentiation;cell growth;cellular component organization;cellular metabolic process;cellular nitrogen compound metabolic process;cellular process;developmental process;growth;macromolecule metabolic process;metabolic process;nitrogen compound metabolic process;nuc…	cell part;cytoplasm;intracellular membrane-bounded organelle;intracellular organelle;macromolecular complex;nucleoplasm;nucleus;organelle;protein complex;transcription factor complex		RPEL;SAP	3	2	2	4.4	3.5	3.5	102.54	0.0010302	3.3747	5	8003300	9672800	31468000	7598000	0
Q8VBT0	Thioredoxin-related transmembrane protein 1	Tmx1	0.0108411	0.128769	-3.98008	0.063369	0.407084	1	-0.987878	0.504219	0.0682177	0.367139	2.9922	7.95687	19	19	19	19	23.9969	24.7413	23.3288	23.8334	19	19	19	19	23.9394	19			biological regulation;cellular homeostasis;cellular metabolic process;cellular process;homeostatic process;macromolecule metabolic process;metabolic process;primary metabolic process;protein folding;protein metabolic process;response to stimulus;response to stress	cell part;endoplasmic reticulum;intracellular membrane-bounded organelle;intracellular non-membrane-bounded organelle;intracellular organelle;membrane;nucleolus;organelle		Thioredoxin	2	2	2	9	9	9	31.395	0.0010589	3.7221	4	0	0	0	0	4196000
Q61205	Platelet-activating factor acetylhydrolase IB subunit gamma	Pafah1b3	0.0111151	0.3457	-0.636885	0.6431	0.173313	0.998954	-0.388688	0.763824	0.364323	0.818836	0.248198	1.18772	24.1087	23.9805	24.4129	24.3144	25.1232	25.1081	24.6436	24.9587	24.3716	24.8108	24.6854	24.1397	25.2281	24.1001			anatomical structure development;catabolic process;developmental process;lipid metabolic process;metabolic process;multicellular organismal process;primary metabolic process	cell part;cytoplasm;cytosol;extracellular organelle;membrane;organelle;vesicle	Ether lipid metabolism		6	6	6	30.6	30.6	30.6	25.853	0	6.2548	10	27771000	35494000	26919000	18720000	3710100
Q99MN1	Lysine--tRNA ligase	Kars1	0.0111262	0.478257	-0.334213	0.793217	0.275826	1	-0.146833	0.903231	0.148357	0.785798	0.18738	1.13869	26.1582	26.101	26.3753	26.0692	26.582	26.5504	26.4136	26.6962	26.3084	26.562	26.1249	26.1399	26.5404	26.2465			amine metabolic process;cellular amino acid metabolic process;cellular ketone metabolic process;cellular metabolic process;cellular nitrogen compound metabolic process;cellular process;macromolecule metabolic process;metabolic process;nitrogen compound metabolic process;nucleobase-containing compound metabolic process;organic acid metabolic process;primary metabolic process;RNA metabolic process;…	cell part;cytoplasm;cytoskeleton;intracellular membrane-bounded organelle;intracellular non-membrane-bounded organelle;intracellular organelle;mitochondrion;organelle	Aminoacyl-tRNA biosynthesis	tRNA_anti-codon;tRNA-synt_2	8	8	8	13.9	13.9	13.9	67.839	0	18.073	45	89443000	96587000	97235000	85553000	18155000
P09602	Non-histone chromosomal protein HMG-17	Hmgn2	0.0111429	0.431107	0.441601	1.35811	0.402724	1	0.20807	1.15514	0.30053	0.803232	-0.233532	0.85055	28.8377	28.4651	28.66	28.8841	28.117	28.5111	28.1248	28.1472	28.4506	28.1479	29.1233	28.7765	28.1614	28.309				cell part;cytoplasm;intracellular membrane-bounded organelle;intracellular organelle;nucleus;organelle		HMG14_17	5	5	5	51.1	51.1	51.1	9.4226	0	23.447	82	493730000	346350000	375450000	496970000	80385000
Q8CA72	Gigaxonin	Gan	0.0112294	0.13931	3.71515	13.1332	0.680189	1	0.753844	1.68628	0.0404297	0.31125	-2.9613	0.128398	24.0406	23.9749	23.8451	19	19	19	19	19	19	19	24.1297	24.0832	19	23.5937			cellular component organization;cellular metabolic process;cellular process;cytoskeleton organization;macromolecule metabolic process;macromolecule modification;metabolic process;organelle organization;primary metabolic process;protein metabolic process;protein modification by small protein conjugation or removal;protein modification process	cell part;cytoplasm;cytoskeleton;intracellular non-membrane-bounded organelle;intracellular organelle;macromolecular complex;organelle;protein complex;ubiquitin ligase complex		BACK;BTB;Kelch_1	3	3	3	5.9	5.9	5.9	67.67	0	6.2414	7	26742000	12968000	8114300	0	1009100
Q8BFZ9	Erlin-2	Erlin2	0.011319	0.761853	0.0969679	1.06952	0.0166993	0.791916	0.343422	1.26876	0.0360541	0.673296	0.246454	1.18629	29.2977	29.2474	29.2127	29.279	29.1526	29.1772	29.1913	29.0873	29.2027	28.625	28.8738	29.0702	29.1745	28.8354			catabolic process;cellular metabolic process;cellular process;macromolecule metabolic process;metabolic process;primary metabolic process;protein metabolic process;proteolysis;proteolysis involved in cellular protein catabolic process	cell part;cytoplasm;endoplasmic reticulum;extracellular organelle;intracellular membrane-bounded organelle;intracellular organelle;macromolecular complex;membrane;organelle;plasma membrane;protein complex;vesicle		Band_7	15	15	11	42.4	42.4	33.2	37.872	0	40.434	143	639130000	640140000	648930000	629560000	142560000
Q8BX10	Serine/threonine-protein phosphatase PGAM5, mitochondrial	Pgam5	0.0119334	0.674372	0.184766	1.13663	0.990595	0.99845	-0.00221376	0.998467	0.268184	0.836125	-0.186979	0.878443	28.9416	28.7319	28.7763	28.9169	28.5881	28.6478	28.6443	28.6486	28.7558	28.3338	29.0466	29.2499	28.7314	28.8577			biological regulation;cell death;cellular localization;cellular metabolic process;cellular process;death;localization;metabolic process;phosphorus metabolic process;response to stimulus;signal transduction	cell part;intracellular membrane-bounded organelle;intracellular organelle;membrane;mitochondrion;organelle		His_Phos_1	13	13	13	44.8	44.8	44.8	31.994	0	26.968	115	561920000	538920000	495800000	479360000	96450000
Q9WU40	Inner nuclear membrane protein Man1	Lemd3	0.0119984	0.436524	0.438988	1.35565	0.748892	1	-0.0562401	0.961767	0.00383993	0.415304	-0.495228	0.709449	26.3955	25.8211	26.0324	26.2948	25.5444	25.6838	25.6152	25.8477	25.7937	26.175	25.871	26.2891	26.0901	26.5357			anatomical structure formation involved in morphogenesis;biological regulation;cell differentiation;cell motility;cellular component movement;cellular component organization;cellular process;developmental process;locomotion;nucleus organization;organelle organization;regulation of cell cycle	cell part;membrane;nuclear envelope		LEM;MSC	8	8	8	13.4	13.4	13.4	100.31	0	17.373	29	126610000	74142000	54672000	113360000	11496000
P83887;Q8VCK3	Tubulin gamma-1 chain	Tubg1	0.0120364	0.462662	-0.383693	0.766473	0.772346	1	-0.0588367	0.960038	0.108117	0.655042	0.324856	1.25254	25.8667	26.1384	25.9896	26.2272	26.5048	26.5797	26.612	26.2629	26.2364	26.0208	25.9627	26.0485	26.736	25.8036			biological regulation;cellular component organization;cellular process;cytoskeleton organization;organelle organization;regulation of cell cycle;regulation of mitotic cell cycle;regulation of organelle organization	apical part of cell;cell leading edge;cell part;cell projection;centrosome;chromosome;cilium;cytoplasm;endosome;gamma-tubulin complex;intracellular membrane-bounded organelle;intracellular non-membrane-bounded organelle;intracellular organelle;macromolecular complex;microtubule organizing center;nuclear chromosome;organelle;protein complex		Tubulin;Tubulin_C	9	9	9	28.2	28.2	28.2	51.1	0	25.509	16	66089000	96212000	82557000	60243000	32589000
Q91WL8	WW domain-containing oxidoreductase	Wwox	0.01227	0.391623	-0.588737	0.664925	0.750848	1	-0.0881103	0.940754	0.0565488	0.501593	0.500626	1.41483	23.9182	23.888	23.2502	23.7582	24.4931	24.0568	24.2373	24.5486	24.126	23.8036	24.0434	23.6113	24.3498	23.1506			anatomical structure morphogenesis;biological regulation;cell differentiation;cellular process;developmental process;response to chemical stimulus;response to endogenous stimulus;response to stimulus;signal transduction	cell part;cell projection;cytoplasm;cytosol;Golgi apparatus;intracellular membrane-bounded organelle;intracellular organelle;membrane;microvillus;mitochondrion;nucleus;organelle;plasma membrane		adh_short;WW	2	2	2	5.6	5.6	5.6	46.512	0.00099867	3.0203	5	17506000	13020000	9064300	18469000	5774300
Q91V12	Cytosolic acyl coenzyme A thioester hydrolase	Acot7	0.0123639	0.462186	-0.386287	0.765096	0.943975	1	-0.0126904	0.991242	0.0726905	0.567362	0.373597	1.29558	28.9046	28.943	29.0105	28.8549	29.4532	29.3233	29.4994	29.3557	28.9409	29.3174	28.7211	28.5984	29.2934	28.7744			biosynthetic process;catabolic process;cellular ketone metabolic process;cellular lipid metabolic process;cellular metabolic process;cellular nitrogen compound metabolic process;cellular process;cofactor metabolic process;heterocycle metabolic process;lipid metabolic process;metabolic process;nitrogen compound metabolic process;nucleobase-containing compound metabolic process;nucleobase-containin…	cell body;cell part;cell projection;cytoplasm;cytosol;extracellular organelle;neuron projection;nucleoplasm;organelle;vesicle	Biosynthesis of unsaturated fatty acids	4HBT	10	10	10	27.8	27.8	27.8	42.536	0	38.366	130	465920000	556820000	456680000	480640000	195190000
Q9JK42	[Pyruvate dehydrogenase (acetyl-transferring)] kinase isozyme 2, mitochondrial	Pdk2	0.0125185	0.505039	0.299257	1.23051	0.430025	1	0.0988862	1.07095	0.158518	0.772942	-0.200371	0.870327	25.0796	25.0387	25.0031	25.0943	24.6613	24.8995	24.4931	24.8545	24.8649	24.9867	24.8475	24.6228	25.1063	25.212			alcohol metabolic process;biological regulation;carbohydrate metabolic process;cell communication;cellular metabolic process;cellular process;homeostatic process;macromolecule metabolic process;macromolecule modification;metabolic process;phosphorus metabolic process;primary metabolic process;protein metabolic process;protein modification process;protein phosphorylation;response to chemical stimu…	cell part;cytoplasm;intracellular membrane-bounded organelle;intracellular organelle;macromolecular complex;mitochondrion;nucleoplasm;organelle;protein complex;pyruvate dehydrogenase complex		BCDHK_Adom3;HATPase_c	5	4	4	14.3	12	12	46.04	0	26.98	16	33025000	38864000	22525000	41185000	8795300
O35226	26S proteasome non-ATPase regulatory subunit 4	Psmd4	0.0127121	0.462857	-0.3816	0.767586	0.111853	1	-0.189569	0.876868	0.188923	0.801082	0.192031	1.14237	25.3604	25.3429	25.4445	25.3262	26.0793	25.7964	25.547	25.7868	25.541	25.8043	25.2684	25.5535	25.4953	25.6689			catabolic process;cellular metabolic process;cellular process;macromolecule metabolic process;metabolic process;primary metabolic process;protein metabolic process;proteolysis;proteolysis involved in cellular protein catabolic process	cell part;cytoplasm;macromolecular complex;nucleoplasm;proteasome complex;protein complex	Proteasome	UIM	2	2	2	8.5	8.5	8.5	40.703	0	10.389	18	38242000	46778000	46300000	45343000	16852000
F8VQK3	Guanylate cyclase domain-containing protein	Gucy1a2	0.0127519	0.529815	-0.278318	0.824552	0.27239	1	-0.192269	0.875228	0.54914	0.927011	0.0860489	1.06146	26.8386	26.6777	26.7453	26.4833	27.0893	26.9944	26.9361	26.8118	26.9913	26.863	26.6975	26.6418	27.373	26.8173			biological regulation;cellular process;response to stimulus;signal transduction		Gap junction;Long-term depression;Purine metabolism;Salivary secretion;Vascular smooth muscle contraction	Guanylate_cyc;HNOB;HNOBA	13	13	13	21	21	21	81.83	0	18.903	42	111620000	138860000	111190000	116880000	25698000
Q8R516	E3 ubiquitin-protein ligase MIB2	Mib2	0.0127904	0.143143	4.45344	21.9088	0.507019	1	0.939094	1.91732	0.0671323	0.375111	-3.51434	0.0875141	24.67	25.1101	24.13	24.5967	19	19	19	19	24.8663	25.0255	25.0288	24.6566	19	24.7271			biological regulation;cellular metabolic process;cellular process;macromolecule metabolic process;macromolecule modification;metabolic process;primary metabolic process;protein metabolic process;protein modification by small protein conjugation or removal;protein modification process;response to stimulus;signal transduction	cell part;endosome;intracellular membrane-bounded organelle;intracellular organelle;macromolecular complex;organelle;protein complex;ubiquitin ligase complex		Ank_2;MIB_HERC2;ZZ	3	3	3	4.9	4.9	4.9	105.96	0.00037736	4.6863	8	7956800	10911000	5166500	7983200	0
Q8CCJ4	APC membrane recruitment protein 2	Amer2	0.0130453	0.428421	0.552268	1.46639	0.0507983	0.860727	0.359444	1.28293	0.317377	0.842996	-0.192823	0.874892	27.058	26.9324	26.7469	27.0864	25.9107	26.4315	26.5541	26.4077	26.7142	26.5905	26.7636	26.3509	26.3231	26.9543			anatomical structure development;biological regulation;cellular process;developmental process;response to stimulus;signal transduction	cell part;membrane;plasma membrane		WTX	7	7	7	16.5	16.5	16.5	69.932	0	16.67	31	128430000	128060000	121580000	125630000	24870000
Q921J2	GTP-binding protein Rheb	Rheb	0.0132526	0.381659	-0.607017	0.656553	0.741292	1	-0.0622501	0.957769	0.0389253	0.474672	0.544767	1.45878	27.0469	27.0421	27.2523	27.0497	28.0592	28.0262	27.731	27.4554	27.2521	27.4599	27.1603	26.6923	27.5232	26.9642			biological regulation;cellular process;response to stimulus;signal transduction	cell body;cell part;cell projection;cytosol;extracellular organelle;macromolecular complex;membrane;neuron projection;neuronal cell body;organelle;ribonucleoprotein complex;spliceosomal complex;vesicle	Insulin signaling pathway;mTOR signaling pathway	Ras	7	7	7	42.4	42.4	42.4	20.451	0	17.086	49	216800000	176120000	184390000	213060000	18621000
A2AJI0	MAP7 domain-containing protein 1	Map7d1	0.0134046	0.455582	0.377173	1.29879	0.729099	1	0.0564985	1.03994	0.0826798	0.632259	-0.320674	0.800696	29.5673	29.3522	29.4505	29.3479	28.9576	28.8753	28.8905	29.3487	29.1893	28.8653	29.3948	29.444	29.5991	29.5616			cellular component organization;cellular process;cytoskeleton organization;organelle organization	cell part;cytoplasm;cytoskeleton;intracellular non-membrane-bounded organelle;intracellular organelle;macromolecular complex;organelle;protein complex		MAP7	24	24	23	31.7	31.7	31.4	93.275	0	60.051	142	756270000	724300000	704170000	723660000	128020000
Q9JK81	UPF0160 protein MYG1, mitochondrial	Myg1	0.0135525	0.171333	3.9229	15.1674	0.414913	1	0.986477	1.98134	0.0783285	0.364565	-2.93642	0.130632	23.8903	24.111	24.0656	23.8435	19	19	19	24.2735	19	24.2272	23.7851	19	24.1939	23.7494			behavior;response to stimulus	cell part;extracellular organelle;intracellular membrane-bounded organelle;intracellular organelle;mitochondrion;nucleoplasm;nucleus;organelle;vesicle		UPF0160	2	2	2	6.3	6.3	6.3	42.722	0	9.294	1	17044000	17851000	17004000	17272000	2622300
Q9R020	Zinc finger Ran-binding domain-containing protein 2	Zranb2	0.0135655	0.420457	0.476725	1.39158	0.331774	1	0.243063	1.1835	0.287413	0.79948	-0.233662	0.850473	27.9053	27.3447	27.6711	27.5342	27.055	27.2749	26.9335	27.0057	27.4164	27.1451	27.9686	27.6244	27.1275	26.988			cellular metabolic process;cellular nitrogen compound metabolic process;cellular process;macromolecule metabolic process;metabolic process;mRNA metabolic process;mRNA processing;nitrogen compound metabolic process;nucleobase-containing compound metabolic process;primary metabolic process;RNA metabolic process;RNA processing;RNA splicing	cell part;nucleoplasm		zf-RanBP	6	6	6	15.2	15.2	15.2	37.35	0	14.593	47	255620000	179840000	179100000	200000000	36484000
Q91WK2	Eukaryotic translation initiation factor 3 subunit H	Eif3h	0.0136737	0.258925	0.913073	1.88305	0.399246	1	0.268176	1.20428	0.103156	0.499441	-0.644898	0.639538	26.1975	25.9891	25.9752	26.286	24.7915	25.3956	24.8024	24.9569	26.048	24.9259	25.7504	25.8941	26.2929	26.3555			cellular component assembly;cellular component organization;cellular macromolecular complex assembly;cellular process;macromolecular complex assembly;ribonucleoprotein complex assembly;translational initiation	cell part;extracellular organelle;macromolecular complex;membrane;organelle;protein complex;ribonucleoprotein complex;vesicle	Measles;RNA transport	JAB	3	3	3	13.6	13.6	13.6	39.832	0	6.0957	14	45989000	38892000	40202000	79956000	18548000
Q60857	Sodium-dependent serotonin transporter	Slc6a4	0.013962	0.205375	-2.84309	0.139362	0.109557	0.53186	-2.60577	0.16428	0.819431	0.936953	0.237313	1.17879	19	22.9231	19	19	22.6263	22.8142	22.5467	22.8516	23.2805	22.8356	23.0086	22.9129	25.1757	19			amine transport;anatomical structure development;anatomical structure morphogenesis;behavior;behavioral interaction between organisms;biological regulation;cell communication;cellular component assembly;cellular component organization;cellular process;circulatory system process;developmental process;establishment of localization;macromolecular complex assembly;multicellular organismal process;mul…	cell part;cell projection;cytosol;endomembrane system;membrane;neuron projection;plasma membrane		5HT_transporter;SNF	2	2	2	4	4	4	70.047	0.0010526	3.6343	2	0	7584400	0	0	1319600
Q2PFD7	PH and SEC7 domain-containing protein 3	Psd3	0.0142453	0.565518	0.260805	1.19815	0.518268	1	0.16016	1.11741	0.655574	0.92538	-0.100645	0.932616	32.7808	32.7407	32.7727	32.872	32.4717	32.325	32.6449	32.5035	32.7087	32.2695	32.9537	32.8155	32.0235	33.0948			biological regulation;cell differentiation;cellular process;developmental process;response to stimulus;signal transduction	cell part;membrane	Endocytosis	Sec7	39	39	39	28.1	28.1	28.1	114.72	0	296.14	729	7381700000	6834600000	6523000000	7545500000	1903700000
P63082	V-type proton ATPase 16 kDa proteolipid subunit	Atp6v0c	0.0142997	0.203892	1.941	3.83973	0.0424125	0.370414	1.45076	2.73351	0.506202	0.818832	-0.490249	0.711902	31.7268	32.5827	31.7511	31.8332	30.3426	28.1971	30.7556	29.8087	31.0583	29.8032	31.3401	31.7392	30.6739	29.0572			biological regulation;cellular homeostasis;cellular ion homeostasis;cellular process;establishment of localization;homeostatic process;hydrogen transport;ion transport;transmembrane transport;transport	cell part;extracellular organelle;macromolecular complex;membrane;organelle;protein complex;proton-transporting two-sector ATPase complex;vesicle	Collecting duct acid secretion;Epithelial cell signaling in Helicobacter pylori infection;ko05152;Lysosome;Oxidative phosphorylation;Phagosome;Rheumatoid arthritis;Vibrio cholerae infection	ATP-synt_C	3	3	3	34.2	34.2	34.2	15.808	0	323.31	204	3365700000	4627700000	3610500000	2361600000	591760000
Q0KL02	Triple functional domain protein	Trio	0.01432	0.484563	-0.332699	0.79405	0.383542	1	-0.126541	0.916025	0.136142	0.762866	0.206158	1.15361	28.7838	29.0645	29.1286	28.9172	29.3225	29.1946	29.5389	29.3287	29.1466	29.4351	29.2028	29.0742	28.9596	28.8288				cell part;cytoplasm		CRAL_TRIO_2;I-set;Pkinase;RhoGEF;SH3_1;Spectrin	57	44	44	20.4	16.8	16.8	347.86	0	161.86	234	458030000	572510000	580480000	689840000	130410000
Q569Z6	Thyroid hormone receptor-associated protein 3	Thrap3	0.0143222	0.518345	0.288559	1.22142	0.585301	1	0.0769807	1.05481	0.159326	0.767794	-0.211578	0.863592	30.3944	30.2559	30.2854	30.2209	29.8689	29.7814	30.109	30.1341	30.1095	30.0945	30.3836	30.4802	29.8297	30.2728			biological regulation;biosynthetic process;catabolic process;cellular metabolic process;cellular nitrogen compound metabolic process;cellular process;macromolecule metabolic process;metabolic process;mRNA metabolic process;mRNA processing;nitrogen compound metabolic process;nucleobase-containing compound metabolic process;primary metabolic process;response to stimulus;rhythmic process;RNA catabol…	cell part;extracellular organelle;intracellular membrane-bounded organelle;intracellular organelle;macromolecular complex;nucleoplasm;nucleus;organelle;protein complex;vesicle		THRAP3_BCLAF1	34	34	33	32.7	32.7	32.7	108.18	0	94.474	255	1524000000	1375600000	1220900000	1322100000	192460000
Q9D8B4	NADH dehydrogenase [ubiquinone] 1 alpha subcomplex subunit 11	Ndufa11	0.0143331	0.258588	-0.923917	0.527076	0.0398265	0.653546	-0.617775	0.651675	0.320279	0.767526	0.306142	1.2364	27.0161	26.7396	26.9565	27.451	28.1372	28.6505	27.3054	27.7124	28.018	27.5481	27.1413	27.8798	27.5033	28.2203			metabolic process	cell part;intracellular membrane-bounded organelle;intracellular organelle;macromolecular complex;mitochondrion;NADH dehydrogenase complex;organelle;protein complex		Tim17	4	4	4	37.6	37.6	37.6	14.982	0	62.503	27	159640000	129400000	133790000	103550000	98557000
Q62413;Q8CBF3;P54754	Ephrin type-A receptor 6	Epha6	0.0146754	0.616588	-0.219874	0.85864	0.243754	1	0.308388	1.23832	0.0337567	0.473644	0.528262	1.44219	24.7543	24.3918	24.5411	24.5676	24.7216	24.7719	24.8162	24.8158	24.7924	24.6024	24.6919	24.0311	23.57	24.3812			anatomical structure development;anatomical structure formation involved in morphogenesis;anatomical structure morphogenesis;behavior;biological adhesion;biological regulation;cell adhesion;cell development;cell differentiation;cell maturation;cell morphogenesis;cell motility;cell proliferation;cell recognition;cellular component morphogenesis;cellular component movement;cellular component organi…	cell body;cell part;cell projection;cell surface;cytoplasm;extracellular organelle;membrane;neuron projection;neuronal cell body;nucleoplasm;organelle;plasma membrane;synapse;vesicle	Axon guidance	EphA2_TM;Ephrin_lbd;fn3;GCC2_GCC3;Pkinase_Tyr;SAM_1;SAM_2	5	3	2	5.4	3.4	2.6	116.18	0.00071505	3.8811	7	30380000	15693000	29552000	18563000	8596200
P80315	T-complex protein 1 subunit delta	Cct4	0.0148605	0.536132	-0.273226	0.827467	0.598972	1	0.066986	1.04753	0.023131	0.551104	0.340212	1.26594	28.4704	28.4013	28.5216	28.6137	28.8088	28.9298	28.8972	28.6059	28.6333	28.4009	28.0929	28.4866	28.7252	28.4683			cell recognition;cellular metabolic process;cellular process;macromolecule metabolic process;metabolic process;primary metabolic process;protein folding;protein metabolic process	cell body;cell part;centrosome;cytoplasm;cytoplasmic membrane-bounded vesicle;extracellular organelle;intracellular membrane-bounded organelle;intracellular non-membrane-bounded organelle;intracellular organelle;macromolecular complex;microtubule organizing center;nucleoplasm;organelle;protein complex;vesicle		Cpn60_TCP1	22	22	22	50.8	50.8	50.8	58.066	0	73.969	154	412500000	383960000	392240000	497800000	108440000
Q8BRF7	Sec1 family domain-containing protein 1	Scfd1	0.0149651	0.481632	-0.333751	0.793471	0.497431	1	1.04202	2.05911	0.315578	0.603305	1.37577	2.59507	25.1361	24.9661	25.3167	25.0718	25.4623	25.5699	25.462	25.5978	25.1902	25.5698	24.8848	25.0497	25.899	19			anatomical structure morphogenesis;biological regulation;cell morphogenesis;cellular component morphogenesis;cellular component organization;cellular membrane organization;cellular process;developmental process;endocytosis;establishment of localization;Golgi vesicle transport;membrane docking;membrane invagination;membrane organization;protein transport;regulation of transport;response to chemica…	cell part;cytoplasmic membrane-bounded vesicle;intracellular membrane-bounded organelle;intracellular organelle;macromolecular complex;membrane;organelle;plasma membrane;protein complex;vesicle		Sec1	8	8	8	17.1	17.1	17.1	72.322	0	20.132	10	32176000	39507000	32269000	27540000	14006000
Q9QYF9	Protein NDRG3	Ndrg3	0.0151075	0.444876	-0.438937	0.737678	0.213661	1	-0.254668	0.83818	0.31948	0.846449	0.184269	1.13624	27.9852	27.9579	27.8766	27.5598	28.2744	28.4797	28.1327	28.5073	28.0249	28.1094	27.8113	27.8536	28.6294	28.0939			biological regulation;cellular process;response to stimulus;signal transduction	cell part;cytoplasm;extracellular organelle;organelle;vesicle		Ndr	9	9	9	34.4	34.4	34.4	41.555	0	27.647	82	314620000	273690000	219520000	199290000	88045000
P61027	Ras-related protein Rab-10	Rab10	0.0151496	0.421283	0.482522	1.39718	0.308763	1	0.24273	1.18323	0.271108	0.781854	-0.239792	0.846867	29.3184	29.0794	29.6126	29.4065	28.7596	28.8775	28.5496	29.0978	29.0738	29.2994	28.928	28.9698	28.672	29.6881			anatomical structure morphogenesis;biological regulation;cell differentiation;cellular component morphogenesis;cellular component organization;cellular localization;cellular membrane organization;cellular process;developmental process;endoplasmic reticulum organization;endosome transport;establishment of localization;establishment or maintenance of cell polarity;Golgi vesicle transport;immune sys…	cell part;cell projection;cilium;cytoplasmic membrane-bounded vesicle;endosome;extracellular organelle;Golgi apparatus;intracellular membrane-bounded organelle;intracellular organelle;membrane;organelle;plasma membrane;vesicle		Ras	8	7	6	44.5	39	35.5	22.541	0	72.934	64	658830000	615880000	610080000	641040000	162720000
O08553	Dihydropyrimidinase-related protein 2	Dpysl2	0.0152155	0.589927	-0.242575	0.845235	0.518797	1	-0.0496716	0.966156	0.0491185	0.742625	0.192904	1.14306	32.9565	32.8925	33.0291	32.857	33.2473	33.3638	33.1693	33.0704	33.031	33.2042	32.8825	32.9074	32.9486	32.9747			anatomical structure development;biological regulation;cellular component organization;cellular membrane organization;cellular process;cytoskeleton organization;developmental process;endocytosis;establishment of localization;locomotion;membrane invagination;membrane organization;organelle organization;regulation of transport;response to chemical stimulus;response to drug;response to endogenous st…	cell body;cell part;cell projection;cytosol;extracellular organelle;intracellular membrane-bounded organelle;intracellular organelle;macromolecular complex;membrane;mitochondrion;neuron projection;neuronal cell body;organelle;protein complex;site of polarized growth;vesicle	Axon guidance	Amidohydro_1	32	32	27	71.3	71.3	60.1	62.277	0	323.31	1001	8748700000	8240700000	8458300000	8128600000	2595200000
Q99N93	39S ribosomal protein L16, mitochondrial	Mrpl16	0.0156601	0.479857	0.340222	1.26595	0.395975	1	0.0639627	1.04533	0.0304024	0.615964	-0.276259	0.825729	24.7706	24.8998	24.8834	24.7496	24.3945	24.3925	24.267	24.5997	24.7745	24.5765	24.7997	24.7308	24.9122	24.7904			biosynthetic process;cellular component organization;cellular metabolic process;cellular process;macromolecule metabolic process;metabolic process;mitochondrial translation;mitochondrion organization;organelle organization;primary metabolic process;protein metabolic process;translation	cell part;intracellular membrane-bounded organelle;intracellular organelle;macromolecular complex;mitochondrion;organelle;ribonucleoprotein complex		Ribosomal_L16	3	3	3	14.3	14.3	14.3	28.803	0	7.5112	2	18249000	17099000	19660000	16803000	20522000
Q810U3	Neurofascin	Nfasc	0.0158806	0.444786	-0.449857	0.732115	0.0512043	0.744155	-0.466119	0.723909	0.925686	0.986993	-0.0162621	0.988791	29.6008	29.1677	29.3676	29.7141	29.9906	30.1042	29.6125	29.9669	29.8877	30.0686	29.5953	29.6822	29.8782	30.419			anatomical structure development;anatomical structure formation involved in morphogenesis;biological adhesion;cell adhesion;cell junction organization;cellular component assembly;cellular component organization;cellular localization;cellular membrane organization;cellular process;developmental process;localization;locomotion;membrane organization;multicellular organismal process;neurological syst…	cell part;cell projection;extracellular organelle;membrane;neuron projection;organelle;plasma membrane;vesicle	Cell adhesion molecules (CAMs)	Bravo_FIGEY;fn3;I-set	29	29	29	28.5	28.5	28.5	137.97	0	101.09	234	870570000	518060000	718640000	879910000	256660000
Q6PDQ2;A2A8L1	Chromodomain-helicase-DNA-binding protein 4	Chd4	0.0161745	0.467408	-0.370358	0.773591	0.649524	1	0.076265	1.05429	0.0288892	0.49481	0.446623	1.36285	26.0644	25.9693	26.0047	25.8435	26.5983	26.2678	26.5278	26.237	26.0731	25.9526	26.1818	26.1467	25.7475	25.4424			biological regulation;biosynthetic process;cell differentiation;cellular component assembly;cellular component organization;cellular metabolic process;cellular nitrogen compound metabolic process;cellular process;chromatin modification;chromatin organization;chromosome organization;cytoskeleton organization;developmental process;histone modification;macromolecule metabolic process;macromolecule m…	cell part;centrosome;chromatin remodeling complex;cytoplasm;cytoskeleton;intracellular membrane-bounded organelle;intracellular non-membrane-bounded organelle;intracellular organelle;macromolecular complex;membrane;microtubule organizing center;nucleolus;nucleoplasm;nucleus;organelle;protein complex;transcriptional repressor complex		CHDCT2;CHDNT;Chromo;DUF1086;DUF1087;Helicase_C;PHD;SNF2_N	8	8	8	4.9	4.9	4.9	217.75	0	15.227	27	64073000	76445000	69606000	79588000	14978000
P62317	Small nuclear ribonucleoprotein Sm D2	Snrpd2	0.0162304	0.463545	0.401015	1.32044	0.0177023	0.694171	0.452777	1.36867	0.654553	0.947612	0.0517616	1.03653	27.7713	27.5794	27.4583	28.003	27.1163	27.2444	27.4991	27.3758	27.2744	27.0459	27.3687	27.3771	27.0145	27.4449			cellular component assembly;cellular component organization;cellular macromolecular complex assembly;cellular process;macromolecular complex assembly;ribonucleoprotein complex assembly	cell part;cytosol;extracellular organelle;macromolecular complex;organelle;protein complex;ribonucleoprotein complex;small nuclear ribonucleoprotein complex;spliceosomal complex;vesicle	Spliceosome	LSM	7	7	7	60.2	60.2	60.2	13.527	0	38.468	44	238030000	273240000	188580000	240570000	54425000
Q8BMS4	Ubiquinone biosynthesis O-methyltransferase, mitochondrial	Coq3	0.0166167	0.423237	-0.546733	0.684569	0.488858	1	-0.184484	0.879964	0.203581	0.691666	0.362248	1.28543	25.194	25.2738	25.4648	25.1937	26.1046	26.164	25.7769	25.7442	25.3519	25.7453	25.3142	24.73	26.0106	25.5301			alcohol metabolic process;biosynthetic process;carbohydrate metabolic process;cellular ketone metabolic process;cellular metabolic process;cellular process;cofactor metabolic process;metabolic process;primary metabolic process;small molecule metabolic process	cell part;intracellular membrane-bounded organelle;intracellular organelle;membrane;mitochondrion;organelle	Ubiquinone and other terpenoid-quinone biosynthesis		3	3	3	13	13	13	40.956	0	5.0114	6	38705000	41675000	47183000	38333000	18853000
F2Z3U3	Ras association (RalGDS/AF-6) and pleckstrin homology domains 1	Raph1	0.0166421	0.512811	0.297606	1.2291	0.0288096	0.762248	0.386455	1.30718	0.52659	0.92363	0.0888493	1.06352	26.0336	25.9794	25.7604	25.8632	25.8454	25.5818	25.4662	25.4882	25.676	25.8421	25.4221	25.204	25.4217	25.7234			biological regulation;cell activation;cell growth;cellular process;developmental process;growth;immune system process;response to stimulus;signal transduction	cell leading edge;cell part;cell projection;cytoskeleton;cytosol;intracellular non-membrane-bounded organelle;intracellular organelle;macromolecular complex;membrane;organelle;plasma membrane;protein complex;receptor complex		PH;RA	8	8	8	8.5	8.5	8.5	136.74	0	17.188	18	93067000	85967000	56871000	70318000	8532100
Q8C4G9	Adhesion G protein-coupled receptor A1	Adgra1	0.0173588	0.536608	0.277869	1.2124	0.0977605	0.965083	-0.344849	0.78739	0.00359991	0.363745	-0.622718	0.649446	27.0605	26.7439	26.9688	26.7294	26.4639	26.7066	26.548	26.7001	26.5704	26.8624	27.3396	27.6252	26.9079	27.3674				cell part;membrane;plasma membrane		7tm_2	5	5	5	12.3	12.3	12.3	63.496	0	12.332	30	154900000	141820000	137640000	90698000	24909000
Q61164	Transcriptional repressor CTCF	Ctcf	0.0178377	0.434658	0.574465	1.48913	0.491532	1	0.220921	1.16548	0.195114	0.69215	-0.353544	0.782659	24.4343	25.1009	24.3043	24.6469	23.7728	24.0067	24.2204	24.2888	23.9471	23.9761	23.7346	24.8219	24.8931	24.5777			biological regulation;cellular component assembly;cellular component organization;cellular metabolic process;cellular nitrogen compound metabolic process;cellular process;chromatin modification;chromatin organization;chromosome organization;chromosome segregation;DNA metabolic process;DNA modification;histone modification;macromolecule metabolic process;macromolecule modification;metabolic proces…	cell part;chromosome;cytoplasm;intracellular membrane-bounded organelle;intracellular non-membrane-bounded organelle;intracellular organelle;nucleolus;nucleoplasm;nucleus;organelle		zf-C2H2	4	4	4	6.7	6.7	6.7	83.745	0	14.582	12	23575000	27433000	23474000	33508000	3021600
P09528	Ferritin heavy chain	Fth1	0.0179791	0.330122	-0.736763	0.600084	0.791455	1	-0.0493954	0.966341	0.0229687	0.421212	0.687368	1.61034	26.2783	26.0967	26.507	26.4303	26.9327	27.5068	27.4373	27.0486	26.3988	26.6154	26.2781	26.3079	25.9363	26.7496			biological regulation;cellular process;establishment of localization;immune system process;ion transport;response to stimulus;transport	cell part;extracellular organelle;extracellular region;intracellular membrane-bounded organelle;intracellular organelle;mitochondrion;nucleus;organelle;vesicle	Mineral absorption;Porphyrin and chlorophyll metabolism	Ferritin	7	7	7	61	61	61	21.066	0	10.64	33	98768000	75514000	84300000	104750000	35008000
Q8R1S0	Ubiquinone biosynthesis monooxygenase COQ6, mitochondrial	Coq6	0.0180721	0.473669	-0.419548	0.747659	0.467961	1	-0.172462	0.887327	0.281858	0.782076	0.247086	1.18681	26.8178	26.893	27.0762	26.6861	27.3903	27.6184	27.121	27.2727	27.0366	27.3486	26.9083	26.5371	27.5832	26.8264			biosynthetic process;cellular ketone metabolic process;cellular metabolic process;cellular process;cofactor metabolic process;metabolic process;small molecule metabolic process	cell part;cell projection;Golgi apparatus;intracellular membrane-bounded organelle;intracellular organelle;membrane;mitochondrion;organelle	Ubiquinone and other terpenoid-quinone biosynthesis	FAD_binding_3	11	11	11	24.2	24.2	24.2	51.392	0	21.787	45	102520000	127000000	105360000	74965000	38390000
P60041	Somatostatin	Sst	0.0182365	0.2936	0.843341	1.7942	0.528645	1	0.17399	1.12817	0.0713107	0.472509	-0.669351	0.628789	26.5912	26.6786	26.9852	26.8081	25.6857	26.3658	25.2545	25.775	26.5311	26.1745	27.2403	26.7884	26.0181	26.7376			biological regulation;response to abiotic stimulus;response to chemical stimulus;response to drug;response to endogenous stimulus;response to heat;response to osmotic stress;response to stimulus;response to stress	cell body;cell part;extracellular space;neuronal cell body	Gastric acid secretion;Neuroactive ligand-receptor interaction	Somatostatin	3	3	3	20.7	20.7	20.7	12.745	0	8.4495	23	114410000	121540000	137680000	135740000	11106000
Q99PL6	UBX domain-containing protein 6	Ubxn6	0.0185894	0.378047	0.67602	1.59773	0.232908	1	0.308029	1.23802	0.104063	0.607478	-0.367991	0.774861	26.7667	26.5929	26.1843	25.9568	25.6493	25.7573	25.3461	25.5868	26.1563	25.7303	26.5483	26.0348	25.7863	26.2361				cell part;cytoplasm;extracellular organelle;intracellular membrane-bounded organelle;intracellular non-membrane-bounded organelle;intracellular organelle;microtubule organizing center;nucleolus;nucleus;organelle;vesicle	Protein processing in endoplasmic reticulum	PUB;UBX	7	7	7	21	21	21	49.795	0	6.1454	10	125880000	131520000	82111000	67106000	12329000
Q91Z67	SLIT-ROBO Rho GTPase-activating protein 2	Srgap2	0.0190885	0.463469	-0.41405	0.750513	0.463696	1	-0.0899887	0.93953	0.0481989	0.577941	0.324062	1.25185	26.9539	27.0029	27.2584	27.0081	27.5333	27.7412	27.3479	27.6071	27.1199	27.3914	26.9709	26.9373	27.2831	27.1463			anatomical structure development;anatomical structure morphogenesis;biological adhesion;biological regulation;cell adhesion;cell morphogenesis;cellular component assembly;cellular component morphogenesis;cellular component organization;cellular process;developmental process;response to stimulus;signal transduction	cell part;cell projection;cytoplasmic membrane-bounded vesicle;cytosol;intracellular membrane-bounded organelle;intracellular organelle;membrane;nucleus;organelle;plasma membrane;vesicle	Axon guidance	FCH;RhoGAP;SH3_1	17	17	15	20.3	20.3	18	120.8	0	29.558	54	184470000	149990000	208380000	169130000	30334000
Q8R1I1	Cytochrome b-c1 complex subunit 9	Uqcr10	0.0197424	0.389468	-0.653418	0.635772	0.0613476	0.743118	-0.522961	0.695942	0.650656	0.919738	0.130457	1.09464	28.005	27.7955	27.8123	27.8545	28.9976	28.8642	27.9772	28.2643	28.498	28.4035	27.97	28.4871	27.9974	29.0909			cellular metabolic process;cellular process;generation of precursor metabolites and energy;metabolic process	cell part;extracellular organelle;intracellular membrane-bounded organelle;intracellular organelle;macromolecular complex;membrane;mitochondrion;organelle;protein complex;respiratory chain complex III;vesicle	Alzheimer's disease;Cardiac muscle contraction;Huntington's disease;Oxidative phosphorylation;Parkinson's disease	UCR_UQCRX_QCR9	3	3	3	50	50	50	7.4454	0	15.839	88	261600000	234600000	221690000	250390000	145930000
P48722	Heat shock 70 kDa protein 4L	Hspa4l	0.0200403	0.62023	-0.225879	0.855074	0.455651	1	-0.0892076	0.940039	0.221238	0.860348	0.136671	1.09937	27.1756	26.9812	27.2246	27.2018	27.3743	27.5298	27.3104	27.4151	27.2289	27.1402	27.0345	27.1785	27.2577	27.5641			cellular metabolic process;cellular process;macromolecule metabolic process;metabolic process;primary metabolic process;protein folding;protein metabolic process;response to chemical stimulus;response to stimulus;response to stress	cell part;cytoplasm;cytosol;intracellular membrane-bounded organelle;intracellular organelle;nucleus;organelle	Protein processing in endoplasmic reticulum	HSP70	13	13	13	18	18	18	94.381	0	27.392	46	176160000	172720000	149720000	199340000	44498000
Q2M3X8	Phosphatase and actin regulator 1	Phactr1	0.0200809	0.537923	0.282375	1.2162	0.809584	1	0.0160195	1.01117	0.0174075	0.60698	-0.266356	0.831417	30.1066	30.1309	30.0029	29.9523	29.7895	29.5371	29.7672	29.7206	30.0145	30.0112	30.0599	30.1938	29.9668	29.929			cell motility;cellular component assembly;cellular component movement;cellular component organization;cellular process;cytoskeleton organization;locomotion;organelle organization	cell cortex;cell part;cytoplasm;cytoskeleton;cytosol;intracellular membrane-bounded organelle;intracellular non-membrane-bounded organelle;intracellular organelle;mitochondrion;nucleoplasm;nucleus;organelle;synapse		Ank;Ank_2;RPEL	20	20	19	40.7	40.7	38.3	66.285	0	87.874	178	1203200000	1278300000	988020000	1143300000	203690000
A2A5R2	Brefeldin A-inhibited guanine nucleotide-exchange protein 2	Arfgef2	0.0202077	0.419568	-0.566938	0.675048	0.343813	1	-0.285055	0.82071	0.297469	0.764549	0.281883	1.21578	24.7429	24.8613	25.3134	24.6636	25.7789	25.3917	25.4758	25.6214	25.0435	25.3606	24.6776	24.9774	25.9476	24.9386			biological regulation;cellular component organization;cellular membrane organization;cellular metabolic process;cellular process;endosome organization;establishment of localization;exocytosis;Golgi vesicle transport;macromolecule metabolic process;membrane organization;metabolic process;organelle organization;protein transport;response to stimulus;secretion;signal transduction;transport;vesicle-m…	cell part;cell projection;cytoplasmic membrane-bounded vesicle;cytosol;endosome;intracellular membrane-bounded organelle;intracellular organelle;macromolecular complex;membrane;microtubule organizing center;neuron projection;organelle;protein complex;synapse;vesicle		DUF1981;Sec7	10	10	7	7.9	7.9	5.9	202.24	0	15.132	29	22985000	41377000	42049000	28311000	13589000
Q60790	Ras GTPase-activating protein 3	Rasa3	0.0203582	0.482051	-0.350965	0.78406	0.420704	1	-0.147511	0.902807	0.295484	0.829436	0.203454	1.15145	27.687	27.7534	27.8129	27.7247	28.2283	27.9652	28.1894	28.3287	27.7658	27.8213	27.5784	27.6225	28.3985	28.0394			biological regulation;cellular process;establishment of localization;ion transport;response to abiotic stimulus;response to heat;response to stimulus;response to stress;signal transduction;transmembrane transport;transport	cell part;cytoplasm	MAPK signaling pathway - fly	BTK;C2;PH;RasGAP	23	23	21	31.9	31.9	30.1	95.986	0	51.969	81	225780000	298240000	238900000	221750000	79922000
Q8BG40	Katanin p80 WD40 repeat-containing subunit B1	Katnb1	0.0208659	0.301636	0.907613	1.87594	0.137769	1	0.2934	1.22553	0.0622418	0.46886	-0.614213	0.653286	24.4747	24.7454	25.0114	24.5914	23.4564	23.2634	23.4618	24.5495	24.2595	24.1076	24.1957	24.6747	24.3501	24.7335			biological regulation;cell division;cellular component movement;cellular process;establishment of localization;metabolic process;regulation of organelle organization	cell body;cell part;cell projection;centrosome;cytoplasm;cytoskeleton;intracellular membrane-bounded organelle;intracellular non-membrane-bounded organelle;intracellular organelle;macromolecular complex;membrane;microtubule organizing center;midbody;neuron projection;neuronal cell body;nucleus;organelle;plasma membrane;protein complex;site of polarized growth		Katanin_con80;WD40	4	4	4	6.7	6.7	6.7	72.638	0	5.6625	12	27874000	25214000	25370000	36715000	6621400
O88735	Ensconsin	Map7	0.020891	0.604193	0.235942	1.17768	0.100444	1	0.249702	1.18896	0.919066	0.988495	0.0137604	1.00958	27.9044	27.8963	27.8362	27.993	27.822	27.4597	27.5884	27.7214	27.7662	27.3392	27.7191	27.6984	27.5129	28.0192			anatomical structure development;anatomical structure morphogenesis;biological regulation;cell development;cell differentiation;cell morphogenesis;cell proliferation;cellular component morphogenesis;cellular component organization;cellular lipid metabolic process;cellular localization;cellular membrane organization;cellular metabolic process;cellular process;cytoskeleton organization;developmenta…	cell part;cytoplasm;cytoskeleton;intracellular non-membrane-bounded organelle;intracellular organelle;macromolecular complex;membrane;organelle;plasma membrane;protein complex		MAP7	15	14	14	20.7	19.2	19.2	82.021	0	31.078	70	283480000	305400000	193850000	285880000	49925000
P27601	Guanine nucleotide-binding protein subunit alpha-13	Gna13	0.0210266	0.480451	-0.353871	0.782482	0.732474	1	-0.0420949	0.971244	0.0574966	0.608152	0.311776	1.24124	28.2099	28.2227	28.2599	28.065	28.6481	28.8211	28.4063	28.5977	28.2432	28.3355	28.0512	28.2944	28.5106	27.9658			anatomical structure formation involved in morphogenesis;anatomical structure morphogenesis;biological regulation;cell activation;cell differentiation;cellular homeostasis;cellular ion homeostasis;cellular process;developmental process;embryo development;homeostatic process;metabolic process;multicellular organismal process;response to stimulus;signal transduction	cell part;cytoplasmic membrane-bounded vesicle;extracellular organelle;intracellular membrane-bounded organelle;intracellular organelle;macromolecular complex;membrane;nucleus;organelle;plasma membrane;protein complex;vesicle	Long-term depression;Regulation of actin cytoskeleton;Vascular smooth muscle contraction	G-alpha	17	16	16	49.1	46.9	46.9	44.054	0	37.414	102	294110000	310850000	355060000	227390000	114020000
Q9QXY6	EH domain-containing protein 3	Ehd3	0.021217	0.505142	-0.315357	0.803652	0.382046	1	-0.166611	0.890933	0.378236	0.872212	0.148745	1.1086	30.2128	30.4373	30.3211	30.0475	30.639	30.7695	30.5435	30.5492	30.3489	30.7558	30.3885	30.2237	30.7274	30.0111			cellular component assembly;cellular component organization;cellular process;endosome transport;establishment of localization;macromolecular complex assembly;protein complex assembly;protein targeting;protein transport;transport;vesicle-mediated transport	cell part;cytoplasm;cytoplasmic membrane-bounded vesicle;intracellular membrane-bounded organelle;intracellular organelle;membrane;organelle;plasma membrane;vesicle	Endocytosis		36	36	24	77.6	77.6	53.8	60.82	0	323.31	399	1407100000	1708300000	1235300000	1397800000	402300000
Q71LX4	Talin-2	Tln2	0.0212643	0.585288	-0.252625	0.839368	0.0290368	1	-0.148135	0.902416	0.191174	0.882114	0.10449	1.07511	29.3287	29.5199	29.3193	29.4136	29.6493	29.8339	29.6823	29.6543	29.4203	29.6505	29.469	29.5179	29.5101	29.57			biological adhesion;biological regulation;cell adhesion;cellular component organization;cellular process;cytoskeleton organization;organelle organization	cell part;cell projection;cytoplasm;cytoskeleton;intracellular non-membrane-bounded organelle;intracellular organelle;membrane;organelle;plasma membrane;synapse	Focal adhesion	FERM_M;FERM_N;I_LWEQ;IRS;Talin_middle;VBS	51	51	44	30.9	30.9	27.7	253.62	0	141.53	212	1040100000	1240000000	628090000	702140000	174060000
Q64331	Unconventional myosin-VI	Myo6	0.0212756	0.582673	-0.261201	0.834393	0.428019	1	-0.0612776	0.958415	0.0543737	0.73431	0.199924	1.14864	29.9669	30.023	29.8725	30.079	30.2855	30.0781	30.2709	30.4757	30.1226	29.9942	29.9482	29.9354	30.1845	30.1709			anatomical structure development;anatomical structure morphogenesis;behavior;biological regulation;cell communication;cell differentiation;cell-cell signaling;cellular component assembly;cellular component organization;cellular membrane organization;cellular process;developmental process;endocytosis;establishment of localization;membrane invagination;membrane organization;multicellular organismal…	brush border;cell body;cell part;cell projection;cytoplasm;cytoplasmic membrane-bounded vesicle;DNA-directed RNA polymerase II, holoenzyme;extracellular organelle;Golgi apparatus;intracellular membrane-bounded organelle;intracellular organelle;macromolecular complex;membrane;neuron projection;neuronal cell body;nucleoplasm;nucleus;organelle;plasma membrane;protein complex;synapse;vesicle		Myosin_head	39	39	39	36.4	36.4	36.4	146.41	0	323.31	306	1146600000	1265600000	1023600000	1272800000	304570000
Q8BR92	Paralemmin-2	Palm2	0.0215979	0.501637	-0.322329	0.799778	0.474567	1	-0.111787	0.925441	0.214368	0.786394	0.210542	1.15712	27.5045	27.6433	27.6552	27.5133	27.6635	27.9151	28.2196	27.9003	27.8084	27.6305	27.8976	27.6905	27.2548	27.9809			biological regulation	cell part;membrane;plasma membrane		Paralemmin	13	11	11	37.2	35.1	35.1	42.095	0	36.785	86	231180000	229880000	204680000	216960000	38097000
Q9D7S7	60S ribosomal protein L22-like 1	Rpl22l1	0.0216577	0.493186	-0.340585	0.789721	0.0613651	0.837589	-0.39115	0.762522	0.756106	0.961809	-0.050565	0.965558	25.2144	24.9969	24.7807	25.0605	25.1805	25.2934	25.506	25.5545	25.2341	25.3874	25.3081	25.3879	25.8963	25.0416			biosynthetic process;cellular metabolic process;cellular process;macromolecule metabolic process;metabolic process;primary metabolic process;protein metabolic process;translation	cell part;intracellular non-membrane-bounded organelle;intracellular organelle;macromolecular complex;organelle;ribonucleoprotein complex;ribosome	Ribosome	Ribosomal_L22e	2	2	2	19.7	19.7	19.7	14.467	0	5.3082	7	48328000	43873000	28999000	19525000	12496000
Q61937	Nucleophosmin	Npm1	0.0216597	0.492305	0.328898	1.25605	0.701668	1	0.0628059	1.0445	0.0871578	0.691113	-0.266092	0.831569	31.1138	30.8797	30.6656	30.8249	30.47	30.3635	30.7642	30.5101	30.6026	30.43	30.7397	31.0486	31.0771	30.7454			aging;biological regulation;cell growth;cellular component assembly;cellular component organization;cellular homeostasis;cellular localization;cellular macromolecular complex assembly;cellular metabolic process;cellular nitrogen compound metabolic process;cellular process;chromatin organization;chromosome organization;developmental process;DNA metabolic process;DNA repair;establishment of localiz…	cell part;centrosome;cytoplasm;cytosol;intracellular membrane-bounded organelle;intracellular non-membrane-bounded organelle;intracellular organelle;macromolecular complex;membrane;microtubule organizing center;nucleolus;nucleoplasm;nucleus;organelle;ribonucleoprotein complex;small ribosomal subunit			14	14	14	57.2	57.2	57.2	32.56	0	323.31	189	2847200000	2280600000	2069700000	1993200000	282390000
P35293	Ras-related protein Rab-18	Rab18	0.0223021	0.391971	-0.670083	0.628471	0.991155	0.998406	-0.0019125	0.998675	0.0234459	0.413566	0.66817	1.58906	26.9371	26.654	26.8925	26.919	27.7897	28.1514	27.3417	27.2063	27.1146	27.3383	26.8275	26.7378	26.8654	26.4939			anatomical structure development;biological regulation;cellular component organization;cellular process;developmental process;endoplasmic reticulum organization;establishment of localization;metabolic process;organelle organization;protein transport;response to stimulus;signal transduction;transport	cell part;extracellular organelle;Golgi apparatus;intracellular;intracellular membrane-bounded organelle;intracellular organelle;organelle;vesicle		Ras	9	9	9	46.6	46.6	46.6	23.035	0	41.294	46	152950000	105960000	131110000	155300000	55489000
O88712	C-terminal-binding protein 1	Ctbp1	0.022393	0.68166	-0.169237	0.889313	0.155471	1	-0.139093	0.90809	0.728719	0.96998	0.0301445	1.02111	30.1649	30.1029	30.2346	30.0747	30.4557	30.2912	30.3126	30.3225	30.1855	30.4771	30.2103	30.2148	30.4227	30.0919			biological regulation;cell differentiation;cellular component organization;cellular process;developmental process;Golgi organization;organelle organization;regulation of cell cycle;regulation of organelle organization;regulation of protein modification process	cell part;cytosol;intracellular membrane-bounded organelle;intracellular organelle;macromolecular complex;nucleoplasm;nucleus;organelle;protein complex;transcription factor complex;transcriptional repressor complex	Chronic myeloid leukemia;Notch signaling pathway;Pathways in cancer;Wnt signaling pathway	2-Hacid_dh;2-Hacid_dh_C	12	12	8	32.2	32.2	24.5	47.744	0	101.15	225	1167100000	1120000000	1145300000	1134400000	379360000
Q7TQD2	Tubulin polymerization-promoting protein	Tppp	0.0224833	0.422675	0.591859	1.50719	0.346551	1	0.21636	1.1618	0.128771	0.627299	-0.375499	0.770839	31.2638	30.6736	30.8748	31.0309	30.0326	30.5455	29.9754	30.6119	30.6792	30.8308	30.8284	30.4989	30.3073	31.2569			biological regulation;cellular component assembly;cellular component organization;cellular macromolecular complex assembly;cellular process;cytoskeleton organization;macromolecular complex assembly;organelle organization;protein complex assembly;protein polymerization	cell part;cytoplasm;intracellular membrane-bounded organelle;intracellular organelle;macromolecular complex;nucleus;organelle;protein complex		p25-alpha	14	14	14	64.7	64.7	64.7	23.574	0	323.31	188	2569300000	1783300000	2291400000	2182300000	279980000
Q80UP3	Diacylglycerol kinase zeta	Dgkz	0.0225308	0.541004	-0.289103	0.818411	0.434286	1	-0.122748	0.918436	0.244332	0.84383	0.166355	1.12222	28.149	27.9971	28.2418	27.895	28.1738	28.5525	28.3522	28.4297	28.291	28.5006	28.253	28.0931	27.8097	28.3112			biological regulation;cellular lipid metabolic process;cellular metabolic process;cellular process;lipid metabolic process;metabolic process;phosphorus metabolic process;primary metabolic process;regulation of cell cycle;regulation of mitotic cell cycle;regulation of protein modification process;response to DNA damage stimulus;response to stimulus;response to stress;signal transduction	cell part;cell projection;cytoplasm;intracellular membrane-bounded organelle;intracellular organelle;membrane;nucleoplasm;nucleus;organelle;plasma membrane	Glycerolipid metabolism;Glycerophospholipid metabolism;Phosphatidylinositol signaling system	Ank_2;C1_1;DAGK_acc;DAGK_cat	22	19	19	32.2	28.3	28.3	104.03	0	43.983	109	301360000	319590000	326810000	205920000	93433000
P58854	Gamma-tubulin complex component 3	Tubgcp3	0.0225535	0.445738	-0.468139	0.722896	0.587504	1	0.107814	1.07759	0.0164027	0.413441	0.575953	1.49066	23.7703	24.2458	24.0625	24.0934	24.6194	24.8095	24.6662	24.211	24.2496	23.9975	23.7946	23.8872	24.4496	23.5471			cellular component organization;cellular process;cytoskeleton organization;organelle organization	cell part;centrosome;cytoplasm;intracellular non-membrane-bounded organelle;intracellular organelle;macromolecular complex;membrane;microtubule organizing center;organelle;protein complex		Spc97_Spc98	4	4	4	6.5	6.5	6.5	103.47	0	6.5635	13	10829000	19343000	22148000	13490000	5480900
A0A0U1RNF2	Leucine carboxyl methyltransferase 1	Lcmt1	0.0231223	0.612737	-0.231773	0.851588	0.310245	1	-0.131026	0.913182	0.431253	0.914486	0.100747	1.07233	27.3136	27.4467	27.3981	27.3079	27.7503	27.6647	27.4685	27.6915	27.4168	27.5568	27.4725	27.2409	27.8485	27.3694							8	8	8	21.4	21.4	21.4	38.161	0	14.867	56	181020000	222630000	115140000	173590000	47220000
P80560	Receptor-type tyrosine-protein phosphatase N2	Ptprn2	0.0235246	0.395722	0.669424	1.59044	0.239621	1	0.448784	1.36489	0.450895	0.854757	-0.22064	0.858185	25.8843	25.2203	26.1308	26.1908	25.0837	25.3866	24.7975	25.3462	25.3217	25.9146	25.1915	25.2117	26.0526	24.6685			biological regulation	cell part;cytoplasmic membrane-bounded vesicle;intracellular membrane-bounded organelle;intracellular organelle;macromolecular complex;membrane;organelle;protein complex;receptor complex;vesicle	Type I diabetes mellitus	Receptor_IA-2;Y_phosphatase	7	7	7	9	9	9	111.5	0	13.934	16	58216000	38139000	46541000	58149000	21833000
Q9D1T0	Leucine-rich repeat and immunoglobulin-like domain-containing nogo receptor-interacting protein 1	Lingo1	0.0238439	0.368097	-0.738076	0.599538	0.60843	1	0.123755	1.08957	0.0196798	0.366857	0.861831	1.81734	24.6616	24.5587	24.6808	24.8634	25.6033	25.925	24.9085	25.8124	24.8969	24.6403	24.5006	24.2626	24.1541	25.2794			anatomical structure development;biological regulation;cell development;cellular component organization;cellular process;developmental process;response to stimulus;signal transduction	cell part;membrane;plasma membrane		I-set;LRR_1;LRR_8	3	3	3	6.4	6.4	6.4	69.1	0.000369	4.3387	12	39302000	20960000	50009000	53765000	13553000
P47740	Aldehyde dehydrogenase family 3 member A2	Aldh3a2	0.024114	0.382448	0.7059	1.63116	0.249892	1	0.415477	1.33374	0.359566	0.79454	-0.290423	0.817662	27.9096	27.1119	27.9126	27.5561	27.3164	26.7617	26.382	27.0623	27.0609	27.2859	26.9637	26.434	27.3829	27.9688			alcohol metabolic process;anatomical structure development;cellular aldehyde metabolic process;cellular lipid metabolic process;cellular metabolic process;cellular process;developmental process;lipid metabolic process;metabolic process;primary metabolic process;small molecule metabolic process	cell part;endoplasmic reticulum;extracellular organelle;intracellular membrane-bounded organelle;intracellular organelle;membrane;microbody;mitochondrion;organelle;peroxisome;vesicle	Arginine and proline metabolism;Ascorbate and aldarate metabolism;beta-Alanine metabolism;Chloroalkane and chloroalkene degradation;Fatty acid metabolism;Glycerolipid metabolism;Glycolysis / Gluconeogenesis;Histidine metabolism;Limonene and pinene degradation;Lysine degradation;Pentose and glucuronate interconversions;Propanoate metabolism;Pyruvate metabolism;Tryptophan metabolism;Valine, leucine…	Aldedh	8	8	7	19.6	19.6	17.1	53.97	0	14.409	21	210860000	163740000	219180000	195700000	37131000
Q8BQP9	Regulator of G-protein signaling 7-binding protein	Rgs7bp	0.0245975	0.41246	-0.55705	0.67969	0.223807	1	-0.296689	0.814119	0.262279	0.767118	0.260361	1.19778	26.7313	26.8329	26.9269	26.3195	27.2223	27.6521	27.4746	26.8899	27.0596	27.3201	26.6948	26.7748	27.4818	26.7252			biological regulation;cellular process;response to stimulus;signal transduction	cell part;cytoplasm;intracellular membrane-bounded organelle;intracellular organelle;membrane;nucleus;organelle;plasma membrane			6	6	6	33.9	33.9	33.9	29.023	0	26.876	30	117150000	132610000	96791000	77835000	34745000
Q8VIM9	Immunity-related GTPase family Q protein	Irgq	0.0248281	0.329966	0.813586	1.75757	0.748078	1	0.0630602	1.04468	0.0166352	0.386057	-0.750526	0.594387	25.2133	24.6867	25.0603	25.4296	23.9162	24.1234	23.7686	24.8634	24.7477	24.9296	24.9568	24.9872	25.4769	24.8215							3	3	3	6	6	6	59.323	0	5.1413	8	36944000	27605000	14909000	30025000	5720900
Q9DB20	ATP synthase subunit O, mitochondrial	Atp5po	0.0249482	0.491023	0.34184	1.26737	0.620817	1	0.0760006	1.05409	0.0692063	0.675802	-0.265839	0.831715	32.8337	32.8281	33.1512	33.199	32.6023	32.6483	32.4407	32.7353	32.8792	32.7358	32.8322	32.8067	32.9385	33.3217			biosynthetic process;cellular metabolic process;cellular nitrogen compound metabolic process;cellular process;establishment of localization;heterocycle metabolic process;hydrogen transport;ion transport;metabolic process;nitrogen compound metabolic process;nucleobase-containing compound metabolic process;nucleobase-containing small molecule metabolic process;nucleotide metabolic process;primary m…	cell part;extracellular organelle;intracellular membrane-bounded organelle;intracellular organelle;macromolecular complex;membrane;mitochondrion;nucleus;organelle;plasma membrane;protein complex;proton-transporting two-sector ATPase complex;vesicle	Alzheimer's disease;Huntington's disease;Oxidative phosphorylation;Parkinson's disease	OSCP	16	16	16	68.1	68.1	68.1	23.363	0	323.31	392	7638200000	7799000000	8039000000	9513100000	2226600000
Q61687	Transcriptional regulator ATRX	Atrx	0.0250266	0.419032	0.570232	1.48476	0.623617	1	0.148276	1.10824	0.200519	0.666764	-0.421956	0.746412	27.3908	27.1003	27.1574	27.1903	26.2637	26.3988	26.5429	26.7546	27.2373	26.8964	27.747	27.3039	26.2307	27.129			anatomical structure development;anatomical structure morphogenesis;biological regulation;biosynthetic process;cell development;cellular component assembly;cellular component organization;cellular macromolecular complex assembly;cellular metabolic process;cellular nitrogen compound metabolic process;cellular process;chromatin modification;chromatin organization;chromosome organization;development…	cell part;chromatin remodeling complex;chromosome;intracellular membrane-bounded organelle;intracellular non-membrane-bounded organelle;intracellular organelle;macromolecular complex;nuclear chromosome;nucleoplasm;nucleus;organelle;protein complex		Helicase_C;SNF2_N	16	16	16	8.1	8.1	8.1	278.58	0	40.042	61	177210000	157620000	145010000	149420000	25644000
Q80V42	Carboxypeptidase M	Cpm	0.0250988	0.316367	-0.899608	0.536032	0.015072	0.65873	-0.475287	0.719324	0.198771	0.663236	0.424321	1.34194	25.8057	26.0387	25.9737	25.8445	26.7566	26.6701	27.771	26.8306	26.0481	26.4745	26.2574	25.9746	26.6433	26.6048				cell part;cell surface;extracellular organelle;membrane;organelle;plasma membrane;vesicle		Peptidase_M14	6	6	6	19.6	19.6	19.6	50.555	0	7.4423	33	73004000	90335000	70440000	65011000	34505000
Q9D517	1-acyl-sn-glycerol-3-phosphate acyltransferase gamma	Agpat3	0.0252463	0.466629	-0.437312	0.738509	0.762711	1	0.0683555	1.04852	0.04373	0.489711	0.505668	1.41978	25.5444	25.5579	25.2672	25.1905	25.8112	26.129	25.6303	26.0375	25.5287	25.0078	25.1618	25.1983	26.0158	25.2245			biosynthetic process;cellular lipid metabolic process;cellular metabolic process;cellular process;glycerol ether metabolic process;lipid metabolic process;metabolic process;primary metabolic process;small molecule metabolic process	cell part;endoplasmic reticulum;intracellular membrane-bounded organelle;intracellular organelle;membrane;nuclear envelope;organelle;plasma membrane	Glycerolipid metabolism;Glycerophospholipid metabolism	Acyltransferase	7	7	7	18.9	18.9	18.9	43.295	0	6.8877	13	33459000	47845000	25396000	44176000	23609000
Q5U3K5	Rab-like protein 6	Rabl6	0.0254196	0.2763	1.05463	2.07719	0.979752	0.999492	-0.00883951	0.993892	0.0340301	0.36704	-1.06347	0.478479	23.8227	23.8226	23.5011	24.1694	22.1152	22.9947	22.1645	22.7824	23.8147	23.3047	24.7501	24.0943	23.793	23.2467			biological regulation;cellular process;response to stimulus;signal transduction	cell part;centrosome;cytoplasm;intracellular membrane-bounded organelle;intracellular non-membrane-bounded organelle;intracellular organelle;microtubule organizing center;nucleolus;nucleus;organelle		Miro	2	2	2	3.7	3.7	3.7	79.83	0.0010323	3.3819	10	11647000	11771000	11245000	14749000	1077300
P60853	Leucine zipper putative tumor suppressor 1	Lzts1	0.0257288	0.460568	0.424632	1.34223	0.444105	1	-0.141872	0.906342	0.0108405	0.418629	-0.566504	0.675251	25.6328	25.1648	25.4916	25.3521	25.1278	24.6936	24.7566	25.1381	25.2125	25.2815	25.644	25.9973	25.5625	25.2758			biological regulation;cell cycle;cellular process	cell body;cell part;cell projection;cytoplasm;membrane;neuron projection			9	9	8	26.2	26.2	24.9	67.289	0	10.322	18	44616000	39330000	38393000	40957000	6158800
Q00612	Glucose-6-phosphate 1-dehydrogenase X	G6pdx	0.0257655	0.440935	-0.479473	0.71724	0.33532	1	-0.232233	0.851316	0.329024	0.804325	0.24724	1.18693	28.4005	28.5478	28.7055	28.4746	29.2138	29.088	28.8526	29.3513	28.552	28.8546	28.4105	28.4432	29.4602	28.6531			alcohol metabolic process;amine metabolic process;anatomical structure development;biological regulation;biosynthetic process;carbohydrate metabolic process;catabolic process;cell development;cell maturation;cellular amino acid metabolic process;cellular ketone metabolic process;cellular metabolic process;cellular nitrogen compound metabolic process;cellular process;circulatory system process;cof…	cell part;centrosome;cytoplasm;cytosol;extracellular organelle;intracellular membrane-bounded organelle;intracellular non-membrane-bounded organelle;intracellular organelle;membrane;microtubule organizing center;organelle;vesicle	Glutathione metabolism;Pentose phosphate pathway	G6PD_C;G6PD_N	22	22	22	47.8	47.8	47.8	59.262	0	76.924	153	379520000	379470000	478330000	414710000	113040000
P21460	Cystatin-C	Cst3	0.0259112	0.342168	-0.84389	0.557139	0.704401	1	0.137899	1.1003	0.0157447	0.369946	0.981789	1.97491	25.3381	24.2509	24.7126	24.9104	25.7206	25.8311	25.4248	26.2191	25.0389	25.4251	24.2869	24.3295	24.1688	25.1154			anatomical structure development;behavior;biological regulation;cell activation;cell death;cell development;cellular component organization;cellular process;death;developmental process;extracellular matrix organization;extracellular structure organization;regulation of DNA metabolic process;response to chemical stimulus;response to drug;response to endogenous stimulus;response to external stimulu…	cell body;cell part;cell projection;endoplasmic reticulum;endosome;extracellular organelle;extracellular region;extracellular space;intracellular membrane-bounded organelle;intracellular non-membrane-bounded organelle;intracellular organelle;lysosome;membrane;neuron projection;neuronal cell body;organelle;vacuole;vesicle	Salivary secretion	Cystatin	2	2	2	20	20	20	15.531	0.00037922	4.7359	6	46738000	22435000	28371000	39150000	15690000
E0CYQ0	Potassium channel tetramerisation domain-containing 17	Kctd17	0.025968	0.294542	0.950055	1.93195	0.640515	1	0.105655	1.07598	0.0361042	0.415475	-0.8444	0.556942	26.1764	26.2296	25.7797	26.1182	24.6052	24.9299	24.4972	25.6593	25.938	25.2793	26.1976	26.1702	26.0687	26.1358			cellular component assembly;cellular component organization;macromolecular complex assembly;protein complex assembly			BTB_2	2	2	2	8.8	8.8	8.8	33.342	0.0046729	2.3325	10	149900000	93496000	89198000	173220000	4967100
Q9WVK4	EH domain-containing protein 1	Ehd1	0.0260355	0.489687	-0.348287	0.785516	0.568327	1	0.107562	1.07741	0.0264947	0.482127	0.455849	1.37159	28.9663	29.3674	29.1797	29.0695	29.6992	29.6774	29.4698	29.3731	29.2506	29.5772	28.8855	28.8081	29.0923	28.8277			biological regulation;cellular component assembly;cellular component organization;cellular membrane organization;cellular process;endocytosis;endosome transport;establishment of localization;homeostatic process;macromolecular complex assembly;membrane invagination;membrane organization;multicellular organismal process;protein complex assembly;protein transport;transport;vesicle-mediated transport	cell part;cytoplasmic membrane-bounded vesicle;endosome;extracellular organelle;intracellular membrane-bounded organelle;intracellular organelle;lipid particle;membrane;organelle;plasma membrane;vesicle	Endocytosis		29	18	17	66.3	45.7	44	60.602	0	79.037	119	569350000	627380000	643510000	627440000	213880000
P63280	SUMO-conjugating enzyme UBC9	Ube2i	0.026129	0.678742	-0.173713	0.886558	0.539052	1	0.0792466	1.05647	0.0533185	0.676716	0.252959	1.19165	24.5597	24.6333	24.4456	24.6213	24.8458	24.6332	24.7103	24.8344	24.6699	24.8096	24.3828	24.1858	24.4829	24.5677			biological regulation;catabolic process;cell division;cellular component organization;cellular metabolic process;cellular process;chromosome segregation;developmental process;macromolecule metabolic process;macromolecule modification;metabolic process;mitosis;multicellular organismal development;multicellular organismal process;nuclear division;organelle fission;organelle organization;primary met…	cell part;cell projection;cytoplasm;intracellular membrane-bounded organelle;intracellular organelle;neuron projection;nucleoplasm;nucleus;organelle;synapse	RNA transport;Ubiquitin mediated proteolysis	UQ_con	2	2	2	14.6	14.6	14.6	18.007	0.0010695	3.8517	2	23478000	25985000	19493000	25458000	9289000
Q80XR2	Calcium-transporting ATPase type 2C member 1	Atp2c1	0.026196	0.46862	-0.446202	0.733972	0.845864	1	-0.0457634	0.968777	0.125402	0.606429	0.400439	1.31991	26.0527	25.9618	25.9356	25.7484	26.4223	26.5925	26.1894	26.6819	25.9681	26.3827	25.4299	25.584	26.2899	26.1654			anatomical structure development;biological adhesion;biological regulation;cell adhesion;cellular component organization;cellular homeostasis;cellular ion homeostasis;cellular process;cytoskeleton organization;developmental process;establishment of localization;homeostatic process;ion transport;organelle organization;response to stimulus;signal transduction;transmembrane transport;transport	cell part;Golgi apparatus;intracellular membrane-bounded organelle;intracellular organelle;membrane;organelle		Cation_ATPase_C;Cation_ATPase_N;E1-E2_ATPase;Hydrolase	8	8	8	9.8	9.8	9.8	100.3	0	15.379	26	91706000	83192000	77909000	54843000	11552000
Q9QYB5	Gamma-adducin	Add3	0.0262002	0.48036	-0.371222	0.773128	0.707782	1	-0.0674924	0.954295	0.133933	0.689389	0.303729	1.23433	27.9352	28.0724	27.8887	28.1216	28.1682	28.5269	28.7247	28.1811	28.2777	28.1447	27.7425	28.1084	27.8022	28.5621				brush border;cell cortex;cell part;cell projection;chromosome;cytoplasm;cytoskeleton;intracellular non-membrane-bounded organelle;intracellular organelle;membrane;nuclear chromosome;nucleoplasm;organelle;plasma membrane		Aldolase_II	18	16	16	26.5	25.2	25.2	78.776	0	47.468	105	326670000	319130000	260570000	298360000	76960000
Q8BJD1	Inter-alpha-trypsin inhibitor heavy chain H5	Itih5	0.0264662	0.444407	-0.493275	0.710411	0.0952648	0.894032	-0.414018	0.75053	0.673285	0.932299	0.0792568	1.05647	24.4367	24.2979	24.9434	24.7929	25.3195	24.9887	25.1245	25.3322	24.7902	25.233	25.4963	24.9325	24.6505	24.8465			amine metabolic process;carbohydrate metabolic process;macromolecule metabolic process;metabolic process;nitrogen compound metabolic process;polysaccharide metabolic process;primary metabolic process	extracellular region		ITI_HC_C;VIT;VWA	6	6	6	6.6	6.6	6.6	106.75	0	6.8638	6	28211000	22942000	33730000	40518000	6649100
Q8BXZ1	Protein disulfide-isomerase TMX3	Tmx3	0.0265465	0.456645	-0.423296	0.745719	0.253795	1	-0.277947	0.824764	0.539258	0.900257	0.145349	1.106	24.6274	24.7548	24.4347	24.57	25.2568	25.0099	24.616	25.2926	24.9249	25.1354	24.7845	24.6641	25.444	24.3455			biological regulation;cellular homeostasis;cellular metabolic process;cellular process;homeostatic process;macromolecule metabolic process;metabolic process;primary metabolic process;protein folding;protein metabolic process;response to stimulus;response to stress	cell part;cell surface;endoplasmic reticulum;intracellular membrane-bounded organelle;intracellular organelle;membrane;organelle		Thioredoxin	4	4	4	11.2	11.2	11.2	51.847	0	5.7838	8	24399000	18504000	22563000	23704000	7230500
Q3UUF8	Ankyrin repeat domain-containing protein 34B	Ankrd34b	0.026683	0.200737	3.3565	10.2425	0.307282	1	0.398399	1.31804	0.0229141	0.205818	-2.9581	0.128683	24.9384	23.8342	23.5754	23.7844	22.8696	19	19	19	23.5134	22.9031	23.5497	24.2069	23.7	23.8138				cell part;cytoplasm;intracellular membrane-bounded organelle;intracellular organelle;nucleus;organelle		Ank_2	4	4	4	8.5	8.5	8.5	55.416	0	6.3221	4	21556000	15468000	5682900	15418000	2226000
Q8K274	Ketosamine-3-kinase	Fn3krp	0.0279627	0.208111	4.17754	18.0952	0.254041	0.802568	1.6519	3.14248	0.191607	0.471254	-2.52563	0.173663	25.0809	25.1805	25.613	25.3991	23.6417	19	19	19	25.0625	19	24.9692	24.7722	24.5963	24.9948			cellular metabolic process;cellular process;metabolic process;phosphorus metabolic process			Fructosamin_kin	4	4	4	18.1	18.1	18.1	34.468	0	7.5839	13	37413000	32655000	48350000	34995000	3280100
P62307	Small nuclear ribonucleoprotein F	Snrpf	0.028122	0.46	0.430575	1.34777	0.00331515	0.609154	0.446788	1.363	0.906849	0.98566	0.0162128	1.0113	26.5578	26.1319	26.3374	26.3306	25.6552	25.7075	26.2783	26.098	25.8052	25.9797	26.0644	25.8676	25.8369	25.7146			cellular component assembly;cellular component organization;cellular macromolecular complex assembly;cellular metabolic process;cellular nitrogen compound metabolic process;cellular process;macromolecular complex assembly;macromolecule metabolic process;metabolic process;mRNA metabolic process;mRNA processing;nitrogen compound metabolic process;nucleobase-containing compound metabolic process;pri…	cell part;cytosol;macromolecular complex;protein complex;ribonucleoprotein complex;small nuclear ribonucleoprotein complex;small nucleolar ribonucleoprotein complex;spliceosomal complex	Spliceosome	LSM	3	3	3	33.7	33.7	33.7	9.7251	0	20.851	27	95514000	76393000	82882000	86719000	17912000
P63141	Potassium voltage-gated channel subfamily A member 2	Kcna2	0.0281627	0.429818	-0.655759	0.634741	0.375898	1	-0.349553	0.784827	0.385102	0.801622	0.306206	1.23645	24.1547	23.279	23.6056	23.6935	24.6808	24.7403	24.1986	23.9747	24.1002	23.1769	23.4942	24.3024	24.6531	24.537			behavior;biological regulation;cellular component assembly;cellular component organization;cellular homeostasis;cellular ion homeostasis;cellular process;developmental process;establishment of localization;homeostatic process;ion transport;macromolecular complex assembly;multicellular organismal process;neurological system process;protein complex assembly;regulation of transport;response to stimu…	cell part;cell projection;macromolecular complex;membrane;neuron projection;protein complex		BTB_2;Ion_trans	6	2	2	15.6	5.8	5.8	56.7	0.00037707	4.6793	17	18042000	11022000	5891600	16515000	6736500
Q8BKZ9	Pyruvate dehydrogenase protein X component, mitochondrial	Pdhx	0.0283186	0.434456	-0.515279	0.699658	0.425627	1	-0.227906	0.853873	0.206945	0.729234	0.287373	1.22042	27.9222	27.5906	28.0279	28.4739	28.7372	28.6288	28.4214	28.5612	28.2462	28.2128	28.0639	27.9035	28.0082	28.9695				cell part;intracellular membrane-bounded organelle;intracellular organelle;mitochondrion;organelle	Citrate cycle (TCA cycle);Glycolysis / Gluconeogenesis;Pyruvate metabolism	2-oxoacid_dh;Biotin_lipoyl;E3_binding	11	11	11	27.3	27.3	27.3	53.998	0	58.46	70	274110000	255050000	324830000	350750000	86726000
O54991	Contactin-associated protein 1	Cntnap1	0.0283614	0.566202	-0.281278	0.822862	0.656255	1	-0.0576826	0.960806	0.0712867	0.71804	0.223596	1.16764	30.603	30.8811	30.9006	30.5954	30.9757	31.0883	31.208	31.0271	30.8324	30.7899	30.7422	30.6314	31.1387	30.7114			anatomical structure formation involved in morphogenesis;anatomical structure morphogenesis;biological adhesion;cell adhesion;cell junction organization;cellular component assembly;cellular component morphogenesis;cellular component organization;cellular localization;cellular process;cytoskeleton organization;developmental process;localization;multicellular organismal process;neurological system …	cell part;membrane;plasma membrane	Cell adhesion molecules (CAMs)	F5_F8_type_C;Laminin_G_2	41	41	41	34.2	34.2	34.2	156.31	0	190.95	451	1529200000	1923300000	3880100000	1668700000	453370000
Q8VBV7	COP9 signalosome complex subunit 8	Cops8	0.0284064	0.196952	-2.63605	0.160868	0.897039	1	0.197251	1.14651	0.0239377	0.216353	2.8333	7.12704	22.4241	19	19	22.9071	23.792	23.8296	23.6836	22.8956	23.1435	23.0601	19	19	19	23.1177			biological regulation;cellular metabolic process;cellular process;macromolecule metabolic process;macromolecule modification;metabolic process;primary metabolic process;protein metabolic process;protein modification by small protein conjugation or removal;protein modification process;regulation of protein modification process	cell part;cytoplasm;extracellular organelle;intracellular membrane-bounded organelle;intracellular organelle;macromolecular complex;nucleoplasm;nucleus;organelle;protein complex;vesicle			2	2	2	16.7	16.7	16.7	23.255	0.0071792	2.0029	3	11234000	8066300	9260500	13703000	3077200
Q9JL04	Formin-2	Fmn2	0.028536	0.407837	0.693879	1.61763	0.761821	1	0.0806643	1.0575	0.0573859	0.475557	-0.613215	0.653738	27.9607	27.5571	27.8123	28.2343	26.623	26.9744	27.3276	27.2737	27.7874	27.1181	28.3239	27.7871	27.8258	27.9972			biological regulation;cellular component assembly;cellular component movement;cellular component organization;cellular process;cytokinesis;cytoskeleton organization;developmental process;establishment of localization;multicellular organismal development;multicellular organismal process;organelle organization;protein transport;regulation of organelle organization;response to chemical stimulus;resp…	cell cortex;cell part;cell projection;cytosol;endoplasmic reticulum;intracellular membrane-bounded organelle;intracellular non-membrane-bounded organelle;intracellular organelle;macromolecular complex;membrane;microvillus;nucleolus;organelle;plasma membrane;protein complex	Dorso-ventral axis formation	Drf_FH1;FH2	15	15	15	14.9	14.9	14.9	167.38	0	31.551	59	178430000	205000000	217810000	309680000	26924000
Q3UGY8	Brefeldin A-inhibited guanine nucleotide-exchange protein 3	Arfgef3	0.0286642	0.457175	-0.422152	0.746311	0.518929	1	0.142653	1.10393	0.0306841	0.467758	0.564804	1.47919	26.7589	26.7167	26.8747	26.5285	27.4006	27.2494	26.9639	27.3457	26.7497	26.6714	26.2022	26.3953	27.2175	26.3988			biological regulation;cellular process;establishment of localization;transport;vesicle-mediated transport	cell part		DUF1981	20	20	20	12.2	12.2	12.2	240.09	0	34.538	43	115010000	94205000	125510000	96226000	34584000
Q3UH66	Serine/threonine-protein kinase WNK2	Wnk2	0.0288249	0.420936	0.594457	1.5099	0.276906	1	-0.285933	0.820211	0.00568381	0.322533	-0.880389	0.543221	25.2302	25.6166	25.1784	24.8872	24.1719	24.502	24.7155	24.6733	25.1054	24.9655	25.2306	25.8305	25.8963	25.6474			biological regulation;cellular metabolic process;cellular process;macromolecule metabolic process;macromolecule modification;metabolic process;phosphorus metabolic process;primary metabolic process;protein metabolic process;protein modification process;protein phosphorylation;regulation of transport	cell part;cytoplasm;membrane;plasma membrane		OSR1_C;Pkinase	4	4	4	2.9	2.9	2.9	227.52	0	9.3184	18	21705000	53484000	37351000	32262000	10501000
Q8BTH8;Q8C4X2;Q8BVP5	Casein kinase I isoform gamma-1	Csnk1g1	0.0290278	0.425522	-0.599396	0.66003	0.17209	1	-0.158009	0.896261	0.046353	0.503251	0.441387	1.35791	23.9053	23.953	24.0667	23.6253	24.8515	24.9908	24.1765	24.2363	24.1797	23.9437	24.1663	23.9511	23.97	24.1968			biological regulation;cellular component organization;cellular membrane organization;cellular metabolic process;cellular process;endocytosis;establishment of localization;macromolecule metabolic process;macromolecule modification;membrane invagination;membrane organization;metabolic process;peptidyl-amino acid modification;phosphorus metabolic process;primary metabolic process;protein metabolic p…	cell part;cytoplasm;intracellular membrane-bounded organelle;intracellular organelle;membrane;nucleus;organelle	Hedgehog signaling pathway	CK1gamma_C;Pkinase	4	4	4	9.6	9.6	9.6	52.743	0	6.9849	13	15491000	16508000	7769500	13390000	10748000
Q9CRC8	Leucine-rich repeat-containing protein 40	Lrrc40	0.0296494	0.200103	3.55354	11.7414	0.131609	0.612648	2.13346	4.38769	0.189636	0.500382	-1.42008	0.373692	22.0471	23.0028	27.1178	22.8638	19	19	19	21.8808	22.1408	22.5386	22.1736	22.3006	19	22.1092				cell part;membrane		LRR_1;LRR_4;LRR_7;LRR_8	4	4	4	7.5	7.5	7.5	68.075	0.00098393	2.8274	1	14848000	21608000	38707000	17934000	3292600
Q8BP47	Asparagine--tRNA ligase, cytoplasmic	NARS1	0.0296848	0.633167	-0.22257	0.857038	0.390631	1	-0.172146	0.887521	0.77626	0.966021	0.0504234	1.03557	29.5956	29.6202	29.7028	29.4505	29.9297	29.9183	29.7844	29.8401	29.6017	29.9188	29.5555	29.5796	30.3241	29.4441			amine metabolic process;cellular amino acid metabolic process;cellular ketone metabolic process;cellular metabolic process;cellular nitrogen compound metabolic process;cellular process;macromolecule metabolic process;metabolic process;nitrogen compound metabolic process;nucleobase-containing compound metabolic process;organic acid metabolic process;primary metabolic process;RNA metabolic process;…	cell part;cytoplasm;extracellular organelle;intracellular membrane-bounded organelle;intracellular organelle;mitochondrion;organelle;vesicle	Aminoacyl-tRNA biosynthesis	tRNA_anti-codon;tRNA-synt_2	22	22	22	42.9	42.9	42.9	64.279	0	121.15	259	901710000	852410000	908450000	725710000	245010000
Q9R1R2	Tripartite motif-containing protein 3	Trim3	0.0298507	0.554519	-0.287205	0.819488	0.785229	1	-0.0377613	0.974165	0.11466	0.717675	0.249444	1.18875	28.251	28.434	28.4636	28.3899	28.5786	28.8383	28.7476	28.8138	28.3806	28.7782	28.229	28.2762	28.5938	28.2347			cellular metabolic process;cellular process;establishment of localization;macromolecule metabolic process;macromolecule modification;metabolic process;primary metabolic process;protein metabolic process;protein modification by small protein conjugation or removal;protein modification process;protein transport;transport	cell part;cytoplasm;endosome;intracellular membrane-bounded organelle;intracellular organelle;organelle		Filamin;NHL;zf-B_box;zf-RING_5	21	21	19	36.8	36.8	34	80.774	0	114.69	120	368940000	398510000	467970000	337090000	83455000
Q9WUM4	Coronin-1C	Coro1c	0.0299651	0.437252	0.518436	1.4324	0.437541	1	0.119564	1.08641	0.0660742	0.558406	-0.398872	0.758451	32.0779	31.9025	31.7411	32.136	31.0842	31.1348	31.4649	31.6522	31.8936	31.5913	32.0722	31.9098	31.5896	32.0611			biological regulation;cellular component assembly;cellular component organization;cellular membrane organization;cellular process;cytoskeleton organization;endocytosis;establishment of localization;membrane invagination;membrane organization;organelle organization;transport;vesicle-mediated transport	cell part;cell projection;cytoplasm;cytoskeleton;intracellular non-membrane-bounded organelle;intracellular organelle;macromolecular complex;organelle;protein complex		DUF1899;DUF1900;WD40	30	30	30	51.9	51.9	51.9	53.12	0	323.31	489	4345900000	4106400000	3533200000	4861000000	671140000
P28652	Calcium/calmodulin-dependent protein kinase type II subunit beta	Camk2b	0.0301485	0.480764	0.380598	1.30188	0.285607	1	0.202513	1.1507	0.312292	0.85122	-0.178085	0.883875	35.5784	35.6935	35.8645	35.39	35.1033	35.0868	35.2429	35.2021	35.6198	35.5524	35.5681	35.6629	34.911	35.4509			biological regulation;cellular metabolic process;cellular process;establishment of localization;ion transport;macromolecule metabolic process;macromolecule modification;metabolic process;multicellular organismal process;neurological system process;peptidyl-amino acid modification;phosphorus metabolic process;primary metabolic process;protein metabolic process;protein modification process;protein …	cell part;cytosol;membrane;microtubule organizing center	Calcium signaling pathway;ErbB signaling pathway;Gastric acid secretion;Glioma;GnRH signaling pathway;ko05152;Long-term potentiation;Melanogenesis;Neurotrophin signaling pathway;Olfactory transduction;Oocyte meiosis;Phototransduction - fly;Wnt signaling pathway	CaMKII_AD;Pkinase	40	30	21	69.9	53.3	39.7	60.46	0	323.31	2030	52596000000	49508000000	50937000000	54086000000	13568000000
Q80TY0	Formin-binding protein 1	Fnbp1	0.0303038	0.524987	-0.312106	0.805465	0.0620251	0.896793	-0.342633	0.788601	0.845302	0.973868	-0.0305271	0.979063	25.2725	25.3969	25.399	25.6116	25.5314	25.7401	25.6024	25.7552	26.0313	25.8355	25.6797	25.6807	26.1884	25.4288			cellular component organization;cellular membrane organization;cellular process;endocytosis;establishment of localization;membrane invagination;membrane organization;transport;vesicle-mediated transport	cell cortex;cell part;cytoplasmic membrane-bounded vesicle;cytoskeleton;intracellular membrane-bounded organelle;intracellular non-membrane-bounded organelle;intracellular organelle;lysosome;membrane;organelle;plasma membrane;vacuole;vesicle		FCH;SH3_1	5	5	5	10.1	10.1	10.1	71.343	0	5.8636	14	46760000	46738000	49075000	47024000	13261000
P15105	Glutamine synthetase	Glul	0.0303207	0.525544	-0.312261	0.805379	0.627635	1	-0.0670087	0.954615	0.0654005	0.696821	0.245252	1.1853	29.9639	29.8317	30.073	30.2786	30.1561	30.3929	30.5733	30.2503	30.3727	30.1813	29.9188	30.0865	29.9254	30.4072			amine metabolic process;biological regulation;biosynthetic process;cell communication;cell proliferation;cellular amino acid metabolic process;cellular component assembly;cellular component organization;cellular ketone metabolic process;cellular metabolic process;cellular nitrogen compound metabolic process;cellular process;macromolecular complex assembly;metabolic process;nitrogen compound metab…	cell body;cell part;cytoplasm;endoplasmic reticulum;extracellular organelle;intracellular membrane-bounded organelle;intracellular organelle;macromolecular complex;mitochondrion;nucleus;organelle;protein complex;vesicle	Alanine, aspartate and glutamate metabolism;Arginine and proline metabolism;Nitrogen metabolism;Two-component system	Gln-synt_C;Gln-synt_N	21	21	21	50.4	50.4	50.4	42.119	0	186.44	223	936660000	858330000	882390000	1319900000	303050000
O70166	Stathmin-3	Stmn3	0.0303531	0.422713	0.630987	1.54862	0.976496	0.999193	0.00715256	1.00497	0.0496189	0.460083	-0.623834	0.648944	24.8007	24.6107	25.0352	25.017	24.1272	24.5001	23.6414	24.7655	24.1405	24.2064	24.8042	24.8118	25.1412	25.3303			biological regulation;cellular component disassembly;cellular component organization;cellular process;cytoskeleton organization;organelle organization;protein depolymerization;regulation of organelle organization	cell part;cell projection;cytoplasm;Golgi apparatus;intracellular membrane-bounded organelle;intracellular organelle;neuron projection;organelle;site of polarized growth		Stathmin	3	3	3	14.4	14.4	14.4	20.954	0.00036603	4.2129	12	30970000	31448000	34479000	35898000	5366500
Q9WV18	Gamma-aminobutyric acid type B receptor subunit 1	Gabbr1	0.0304434	0.583711	0.266567	1.20294	0.975363	0.998908	-0.00675678	0.995328	0.146098	0.715275	-0.273324	0.827411	27.7442	27.8782	27.8643	27.4237	27.5243	27.3654	27.4762	27.4272	27.512	27.5649	27.7592	28.0093	28.1414	27.1969			biological regulation;cellular process;response to stimulus;signal transduction	cell part;cell projection;cytoplasm;membrane;neuron projection	Neuroactive ligand-receptor interaction	7tm_3;ANF_receptor;Sushi	13	13	13	17.4	17.4	17.4	108.21	0	25.556	62	230050000	275680000	257340000	240530000	41972000
Q91YT0	NADH dehydrogenase [ubiquinone] flavoprotein 1, mitochondrial	Ndufv1	0.030641	0.753487	-0.104332	0.930236	0.07647	1	-0.173491	0.886694	0.364704	0.926703	-0.0691593	0.953193	31.741	31.8796	31.8137	31.734	31.8978	31.9248	31.843	31.9592	31.8573	31.9592	31.9187	31.9503	32.2116	31.7881				cell part;intracellular membrane-bounded organelle;intracellular organelle;macromolecular complex;membrane;mitochondrion;NADH dehydrogenase complex;organelle;protein complex	Alzheimer's disease;Huntington's disease;Oxidative phosphorylation;Parkinson's disease	Complex1_51K;NADH_4Fe-4S;SLBB	30	30	30	70.5	70.5	70.5	50.834	0	323.31	523	3884500000	4381300000	3914800000	3623900000	755040000
P05213	Tubulin alpha-1B chain	Tuba1b	0.0306458	0.47937	-0.377552	0.769742	0.165264	1	-0.258794	0.835786	0.522338	0.914913	0.118758	1.0858	36.9954	37.2549	37.2283	37.0266	37.78	37.6721	37.3403	37.5627	37.1641	37.6787	37.0773	37.097	37.7239	37.3486			cellular component assembly;cellular component organization;cellular macromolecular complex assembly;cellular metabolic process;cellular process;cytoskeleton organization;macromolecular complex assembly;macromolecule metabolic process;metabolic process;organelle organization;primary metabolic process;protein complex assembly;protein folding;protein metabolic process;protein polymerization;respons…	cell part;cytosol;extracellular organelle;macromolecular complex;organelle;protein complex;vesicle	Gap junction;Pathogenic Escherichia coli infection;Phagosome	Tubulin;Tubulin_C	40	40	0	78	78	0	50.151	0	323.31	3673	128000000000	178000000000	141000000000	140000000000	77185000000
P63300	Selenoprotein W	Selenow	0.0307039	0.373723	0.785067	1.72317	0.427691	1	1.25871	2.39283	0.72882	0.914831	0.473648	1.38862	25.3671	25.2541	25.0496	26.1149	24.2307	24.9914	24.2114	24.8357	25.0378	25.0051	25.989	25.5039	19	25.4408			biological regulation;cellular homeostasis;cellular process;homeostatic process;metabolic process	cell part;cytoplasm;membrane;plasma membrane		Rdx	2	2	2	21.6	21.6	21.6	9.6871	0.0037629	2.3798	4	35347000	51560000	38212000	66554000	6616800
P17095	High mobility group protein HMG-I/HMG-Y	Hmga1	0.0313557	0.490809	0.350267	1.2748	0.659416	1	0.0773244	1.05506	0.171817	0.722901	-0.272943	0.82763	29.4283	29.3494	29.3143	29.5034	28.8843	29.3933	28.798	28.9562	29.2111	28.9708	29.6321	29.5056	28.9718	29.5273			aging;biological regulation;biosynthetic process;cellular component assembly;cellular component organization;cellular metabolic process;cellular nitrogen compound metabolic process;cellular process;chromatin modification;chromatin organization;chromosome organization;developmental process;macromolecule metabolic process;metabolic process;nitrogen compound metabolic process;nucleobase-containing c…	cell part;intracellular membrane-bounded organelle;intracellular organelle;nucleus;organelle		AT_hook	9	9	9	64.5	64.5	64.5	11.614	0	28.155	110	736580000	666170000	590200000	736620000	130200000
Q5SUR0	Phosphoribosylformylglycinamidine synthase	Pfas	0.0314073	0.425748	-0.543614	0.68605	0.941666	1	0.0171838	1.01198	0.0656797	0.495258	0.560798	1.47509	25.701	25.8653	25.882	25.7259	26.0734	26.4819	26.8147	26.4969	25.819	26.2183	25.7496	25.2754	26.2204	25.4182			amine metabolic process;biosynthetic process;cellular amino acid metabolic process;cellular ketone metabolic process;cellular metabolic process;cellular nitrogen compound metabolic process;cellular process;heterocycle metabolic process;metabolic process;nitrogen compound metabolic process;nucleobase-containing compound metabolic process;nucleobase-containing small molecule metabolic process;nucle…	cell part;cytoplasm;extracellular organelle;organelle;vesicle	Purine metabolism	AIRS;AIRS_C	4	4	4	6.1	6.1	6.1	144.63	0	14.884	21	100010000	47521000	40309000	39492000	9745200
Q6ZQ82	Rho GTPase-activating protein 26	Arhgap26	0.0315796	0.444519	0.510771	1.42481	0.762524	1	-0.0629036	0.957335	0.0438112	0.473136	-0.573674	0.671903	28.2858	28.1716	28.2166	28.3511	27.3357	27.7614	27.4279	27.9906	28.212	27.6925	28.1882	28.5512	28.6201	28.5441			biological regulation;cellular component organization;cellular membrane organization;cellular process;cytoskeleton organization;membrane organization;organelle organization;plasma membrane organization;response to stimulus;signal transduction	cell part;cytoplasm;cytoskeleton;intracellular non-membrane-bounded organelle;intracellular organelle;organelle		IMD;RhoGAP;SH3_9	12	12	12	15.6	15.6	15.6	92.07	0	42.287	42	375460000	291200000	228270000	319240000	41049000
Q80WC7	Arf-GAP domain and FG repeat-containing protein 2	Agfg2	0.0317824	0.329893	0.910346	1.8795	0.153051	0.930526	0.458092	1.37372	0.223285	0.672036	-0.452254	0.7309	26.4771	26.1478	26.013	26.7888	25.2425	25.2277	24.8129	25.5324	26.4164	25.4675	26.4424	25.802	25.434	26.3472				cell part;membrane		ArfGap	5	5	5	14.2	14.2	14.2	48.967	0	18.687	22	83418000	81406000	56832000	81856000	18555000
Q80XN0	D-beta-hydroxybutyrate dehydrogenase, mitochondrial	Bdh1	0.0318163	0.48267	-0.375503	0.770836	0.645078	1	-0.0858809	0.942209	0.168264	0.715309	0.289622	1.22232	30.2695	30.3002	30.4806	30.2367	31.03	30.7745	30.5891	30.7668	30.3259	30.7133	30.2389	30.1215	30.8322	30.1322			anatomical structure development;developmental process;response to chemical stimulus;response to drug;response to endogenous stimulus;response to external stimulus;response to extracellular stimulus;response to starvation;response to stimulus;response to stress	cell part;cytoplasm;intracellular membrane-bounded organelle;intracellular organelle;membrane;mitochondrion;nucleoplasm;organelle	Butanoate metabolism;Synthesis and degradation of ketone bodies	adh_short	18	18	18	58.3	58.3	58.3	38.299	0	323.31	315	1443800000	1444800000	1171900000	1223200000	619070000
Q5SXY1	Cytospin-B	Specc1	0.032083	0.460869	0.425272	1.34283	0.190559	1	0.146193	1.10665	0.129431	0.706405	-0.279079	0.824117	29.0414	29.013	29.0419	29.1014	28.2376	28.4524	28.8726	28.5529	29.0053	28.6148	29.124	29.0347	28.8332	28.9094			biological adhesion;cell adhesion;cellular process	cell part;intracellular membrane-bounded organelle;intracellular organelle;nucleus;organelle		CH	30	30	29	29.8	29.8	28.6	118.1	0	68.213	146	481280000	596100000	600920000	587490000	73355000
Q91WA3	Histone deacetylase 11	Hdac11	0.0325718	0.423665	-0.660324	0.632736	0.165645	0.984349	-0.412125	0.751515	0.433296	0.847837	0.248198	1.18772	24.9574	25.0327	24.6958	24.6032	25.7328	25.8028	25.1852	25.867	24.8251	25.6606	24.9764	24.4871	25.5585	25.4893			anatomical structure development;biological regulation;biosynthetic process;cell development;cellular component organization;cellular metabolic process;cellular nitrogen compound metabolic process;cellular process;chromatin modification;chromatin organization;chromosome organization;developmental process;histone modification;macromolecule metabolic process;macromolecule modification;metabolic pro…	cell part;chromatin remodeling complex;cytoplasm;extracellular organelle;intracellular membrane-bounded organelle;intracellular organelle;macromolecular complex;membrane;nucleus;organelle;plasma membrane;protein complex;vesicle		Hist_deacetyl	7	7	7	25.1	25.1	25.1	39.157	0	13.452	29	18274000	29981000	39734000	34039000	13261000
Q8K4Q0	Regulatory-associated protein of mTOR	Rptor	0.0326226	0.589545	-0.261344	0.834311	0.197541	1	-0.180712	0.882267	0.545271	0.926916	0.0806313	1.05748	27.5417	27.6937	27.7284	27.5002	27.9128	28.0984	27.6962	27.9562	27.7231	27.8782	27.6221	27.5232	28.1101	27.85			biological regulation;cell communication;cell growth;cellular component organization;cellular process;growth;regulation of protein modification process;regulation of transport;response to chemical stimulus;response to endogenous stimulus;response to external stimulus;response to extracellular stimulus;response to stimulus;signal transduction	cell part;cytoplasm;intracellular membrane-bounded organelle;intracellular organelle;lysosome;macromolecular complex;membrane;nucleoplasm;organelle;protein complex;vacuole		Raptor_N;WD40	17	17	17	17.3	17.3	17.3	149.47	0	60.112	73	190980000	235610000	242220000	195900000	63925000
O35343	Importin subunit alpha-3	Kpna4	0.0327228	0.390817	0.753437	1.6858	0.933563	1	-0.0282239	0.980627	0.0517447	0.412674	-0.781661	0.581697	26.3791	26.3007	25.785	26.475	25.9192	25.3478	24.859	25.2407	26.041	25.3914	26.4505	26.3333	26.1312	27.0096			establishment of localization;nuclear transport;nucleocytoplasmic transport;protein targeting;protein transport;response to chemical stimulus;response to oxidative stress;response to stimulus;response to stress;transport	cell part;cytoplasm;extracellular organelle;intracellular membrane-bounded organelle;intracellular organelle;nucleus;organelle;vesicle		Arm;IBB	5	5	2	11.5	11.5	4.6	57.922	0	10.105	25	100190000	80119000	41237000	134240000	8638400
Q9Z2Z6	Mitochondrial carnitine/acylcarnitine carrier protein	Slc25a20	0.0328083	0.502385	-0.333339	0.793698	0.264262	1	-0.270537	0.829011	0.757088	0.952669	0.0628014	1.04449	25.8965	26.13	25.6882	26.0938	26.3482	26.4609	26.064	26.4136	26.1405	26.501	25.636	25.9646	26.5082	26.5034			establishment of localization;transport	cell part;cytoplasm;intracellular membrane-bounded organelle;intracellular organelle;membrane;mitochondrion;organelle		Mito_carr	6	6	6	27.2	27.2	27.2	33.026	0	12.937	38	64601000	75605000	61635000	85310000	24631000
E9Q2E4	HECT domain-containing protein	Hectd4	0.032869	0.459908	-0.481405	0.71628	0.347838	1	-0.207708	0.865912	0.263832	0.761836	0.273697	1.2089	26.1601	26.3892	26.473	26.1918	26.9965	27.1595	26.5833	26.861	26.3243	26.988	26.1102	26.1733	26.8112	26.4735						HECT	13	13	13	4.4	4.4	4.4	484.12	0	15.86	43	69269000	92865000	101600000	74986000	27982000
Q6P3A8	2-oxoisovalerate dehydrogenase subunit beta, mitochondrial	Bckdhb	0.0329366	0.545545	-0.29577	0.814637	0.131998	0.964058	-0.383093	0.766792	0.688662	0.931248	-0.087323	0.941268	25.6808	25.8836	25.6591	25.589	26.1069	26.2042	25.7116	25.9186	26.0531	25.9131	25.5232	26.3713	26.6338	25.9896			amine metabolic process;catabolic process;cellular amino acid metabolic process;cellular ketone metabolic process;cellular metabolic process;cellular nitrogen compound metabolic process;cellular process;metabolic process;nitrogen compound metabolic process;organic acid metabolic process;primary metabolic process;response to chemical stimulus;response to endogenous stimulus;response to external st…	cell part;intracellular membrane-bounded organelle;intracellular organelle;macromolecular complex;membrane;mitochondrion;organelle;protein complex;tricarboxylic acid cycle enzyme complex	Valine, leucine and isoleucine degradation	Transket_pyr;Transketolase_C	5	5	5	20.5	20.5	20.5	42.88	0	8.6991	24	30234000	75619000	49764000	60424000	13431000
Q9WTS2	Alpha-(1,6)-fucosyltransferase	Fut8	0.0329515	0.19487	-2.50744	0.175868	0.0386022	0.310968	-3.43579	0.0924109	0.33249	0.663868	-0.928357	0.525456	22.7348	22.491	19	19	23.8896	23.4794	23.5171	22.8448	22.8386	23.077	22.7785	23.1172	24.7885	27.4501	+		alcohol metabolic process;biological regulation;carbohydrate metabolic process;cell motility;cellular component movement;cellular metabolic process;cellular nitrogen compound metabolic process;cellular process;locomotion;macromolecule metabolic process;macromolecule modification;metabolic process;multicellular organismal process;nitrogen compound metabolic process;nucleobase-containing compound m…	cell part;cytoplasm;extracellular organelle;membrane;organelle;vesicle	Glycosaminoglycan biosynthesis - keratan sulfate;N-Glycan biosynthesis;Various types of N-glycan biosynthesis	SH3_9	2	2	2	4.7	4.7	4.7	66.556	1	-2	2	12429000	12062000	6287300	0	7533600
Q6PAK3	Protein arginine N-methyltransferase 8	Prmt8	0.0329746	0.440384	-0.505371	0.704479	0.127496	1	-0.220708	0.858144	0.112982	0.692433	0.284663	1.21813	25.7049	25.5942	25.7735	25.2625	26.1913	26.1889	26.2739	26.2718	25.5198	25.8475	25.8478	25.7971	25.5497	25.9802			biological regulation;cellular component organization;cellular metabolic process;cellular process;chromatin modification;chromatin organization;chromosome organization;histone modification;macromolecule metabolic process;macromolecule modification;metabolic process;one-carbon metabolic process;organelle organization;peptidyl-amino acid modification;primary metabolic process;protein alkylation;pro…	cell part;cytosol;membrane;plasma membrane			8	6	6	25.6	20.6	20.6	45.276	0	15.806	29	30007000	42250000	98876000	53208000	15657000
O54829	Regulator of G-protein signaling 7	Rgs7	0.0331282	0.680619	-0.188409	0.877573	0.122854	1	-0.252826	0.839251	0.633797	0.937178	-0.0644173	0.956332	29.3335	29.3435	29.4843	29.2341	29.5992	29.6665	29.3774	29.5055	29.5377	29.7601	29.4539	29.5903	29.9516	29.2526			biological regulation;cellular process;response to stimulus;signal transduction	cell part;cytoplasm;intracellular membrane-bounded organelle;intracellular organelle;macromolecular complex;membrane;nucleus;organelle;plasma membrane;protein complex		DEP;G-gamma;RGS	18	18	14	43.5	43.5	35.2	54.791	0	126	150	712280000	741940000	822360000	665130000	184810000
Q9CRA7	ATP synthase subunit s, mitochondrial	Dmac2l	0.0331691	0.621008	-0.237784	0.848047	0.55291	1	0.704706	1.62981	0.372462	0.692784	0.94249	1.92184	23.5847	23.7144	23.8301	23.5273	23.8892	23.9748	23.9733	23.9964	23.6758	24.0903	19	23.6096	24.254	23.8432			biosynthetic process;cellular metabolic process;cellular nitrogen compound metabolic process;cellular process;establishment of localization;heterocycle metabolic process;hydrogen transport;ion transport;metabolic process;nitrogen compound metabolic process;nucleobase-containing compound metabolic process;nucleobase-containing small molecule metabolic process;nucleotide metabolic process;primary m…	cell part;intracellular membrane-bounded organelle;intracellular organelle;macromolecular complex;membrane;mitochondrion;organelle;protein complex			2	2	2	12	12	12	23.275	0.0088626	1.8904	2	6853500	8291300	9052800	6302500	2773800
Q8VDJ3	Vigilin	Hdlbp	0.0333101	0.491277	-0.354952	0.781895	0.455732	1	-0.110021	0.926574	0.103587	0.71728	0.244931	1.18504	26.5103	26.6768	26.3118	26.25	26.885	26.9053	26.721	26.9813	26.4683	26.8455	26.384	26.3229	26.6883	26.4955			alcohol metabolic process;establishment of localization;lipid metabolic process;lipid transport;metabolic process;primary metabolic process;small molecule metabolic process;transport	cell part;cytoplasm;intracellular membrane-bounded organelle;intracellular organelle;macromolecular complex;nucleus;organelle		KH_1	13	13	13	12.8	12.8	12.8	141.74	0	26.142	50	71686000	110300000	87118000	69608000	28058000
P70168	Importin subunit beta-1	Kpnb1	0.0333682	0.588069	0.261562	1.19878	0.904114	1	0.0269307	1.01884	0.293784	0.800867	-0.234631	0.849902	28.8586	28.8764	28.8725	28.8229	28.7363	28.6721	28.2723	28.564	28.7355	28.8044	28.5447	28.6023	29.5704	28.6316			establishment of localization;nuclear transport;nucleocytoplasmic transport;protein targeting;protein transport;transport	cell part;cytoplasm;extracellular organelle;macromolecular complex;membrane;nuclear envelope;nucleoplasm;organelle;protein complex;vesicle	RNA transport	IBN_N	17	17	17	22.3	22.3	22.3	97.183	0	87.979	106	539210000	498330000	572240000	547470000	63455000
Q9D7B6	Isobutyryl-CoA dehydrogenase, mitochondrial	Acad8	0.0334908	0.466874	-0.411573	0.751803	0.972805	1	-0.0134841	0.990697	0.261721	0.705266	0.398089	1.31776	27.5203	28.1158	27.8805	28.1111	28.5283	28.2707	28.1173	28.5045	28.1717	28.7303	27.4908	27.4002	28.6649	27.3158			amine metabolic process;catabolic process;cellular amino acid metabolic process;cellular ketone metabolic process;cellular metabolic process;cellular nitrogen compound metabolic process;cellular process;metabolic process;nitrogen compound metabolic process;organic acid metabolic process;primary metabolic process;small molecule metabolic process	cell part;intracellular membrane-bounded organelle;intracellular organelle;mitochondrion;organelle	Valine, leucine and isoleucine degradation	Acyl-CoA_dh_1;Acyl-CoA_dh_M;Acyl-CoA_dh_N	11	11	11	38.7	38.7	38.7	45.019	0	36.026	82	158590000	338050000	246940000	286710000	95630000
Q3UDP0	WD repeat-containing protein 41	Wdr41	0.0336075	0.463509	-0.422614	0.746072	0.613284	1	0.67238	1.5937	0.360563	0.674914	1.09499	2.13612	24.1615	24.0752	23.9499	24.1178	24.205	24.9274	24.3304	24.7103	24.3206	24.5671	19	24.0308	24.1767	25.2441				cell part;membrane		WD40	3	3	3	8.3	8.3	8.3	51.51	0	5.391	12	21213000	20018000	21891000	20282000	5183500
Q14BB9	MAP6 domain-containing protein 1	Map6d1	0.0336258	0.585991	-0.272351	0.827969	0.583544	1	-0.0639236	0.956659	0.0971671	0.748248	0.208427	1.15543	29.3611	29.5671	29.5623	29.3018	29.7383	29.5543	29.9925	29.6708	29.6463	29.8153	29.5546	29.4145	29.3546	29.4211			anatomical structure morphogenesis;biological regulation;cellular component morphogenesis;cellular component organization;cellular localization;cellular metabolic process;cellular process;cytoskeleton organization;developmental process;localization;macromolecule metabolic process;macromolecule modification;metabolic process;organelle localization;organelle organization;peptidyl-amino acid modific…	cell part;cytoplasmic membrane-bounded vesicle;intracellular membrane-bounded organelle;intracellular organelle;macromolecular complex;organelle;protein complex;vesicle		STOP	9	9	9	74.9	74.9	74.9	20.432	0	105.82	190	685070000	904500000	707790000	642720000	211890000
P53986	Monocarboxylate transporter 1	Slc16a1	0.0339303	0.279282	1.23852	2.35956	0.454447	1	0.357788	1.28146	0.160339	0.504478	-0.88073	0.543093	26.6736	26.7344	26.6598	26.3818	24.9605	25.2021	24.1484	26.1462	26.4121	25.6114	25.7682	26.0293	27.7932	26.0709			biological regulation;cellular component organization;cellular process;establishment of localization;homeostatic process;ion transport;lipid metabolic process;metabolic process;microtubule organizing center organization;organelle organization;organic acid transport;primary metabolic process;regulation of transport;response to chemical stimulus;response to external stimulus;response to extracellul…	cell part;centrosome;extracellular organelle;intracellular membrane-bounded organelle;intracellular non-membrane-bounded organelle;intracellular organelle;membrane;microtubule organizing center;mitochondrion;organelle;plasma membrane;vesicle		MFS_1	5	5	5	13.8	13.8	13.8	53.267	0	19.564	21	71097000	106800000	108730000	105320000	10094000
Q9Z1R2	Large proline-rich protein BAG6	Bag6	0.0340628	0.417191	0.65097	1.57022	0.301027	0.894171	1.52637	2.88061	0.485673	0.768459	0.875404	1.83452	24.9811	25.7481	25.579	24.7593	25.0414	24.5136	24.5207	24.3281	24.6757	25.0686	19	24.5045	24.8728	25.2565			anatomical structure development;biological regulation;catabolic process;cell death;cell differentiation;cellular component assembly;cellular component organization;cellular localization;cellular metabolic process;cellular process;chromatin modification;chromatin organization;chromosome organization;death;developmental process;embryo development;establishment of localization;immune system process…	cell part;cytoplasm;cytosol;intracellular membrane-bounded organelle;intracellular organelle;macromolecular complex;nucleoplasm;nucleus;organelle;protein complex		DUF3538;ubiquitin	5	5	5	5.7	5.7	5.7	121.04	0	5.3173	10	40445000	42811000	28744000	35774000	10299000
Q99N94	39S ribosomal protein L9, mitochondrial	Mrpl9	0.034086	0.491413	-0.356667	0.780967	0.552694	1	0.620218	1.53711	0.295751	0.613461	0.976885	1.96821	22.6584	23.1874	23.1034	23.2433	23.5496	23.392	23.3561	23.2091	23.5173	19	22.731	23.5533	23.6143	23.2411			biosynthetic process;cellular metabolic process;cellular process;macromolecule metabolic process;metabolic process;primary metabolic process;protein metabolic process;translation	cell part;intracellular membrane-bounded organelle;intracellular non-membrane-bounded organelle;intracellular organelle;macromolecular complex;mitochondrion;organelle;ribonucleoprotein complex;ribosome		Ribosomal_L9_N	2	2	2	7.9	7.9	7.9	30.244	0.0046685	2.33	4	5786500	17327000	5583400	6731600	2380500
Q8C522	Endonuclease domain-containing 1 protein	Endod1	0.0345955	0.467015	-0.473744	0.720093	0.218881	1	-0.231129	0.851968	0.08347	0.706203	0.242616	1.18314	27.6367	26.8667	27.1883	27.0207	27.8603	27.8463	27.4814	27.6779	27.3933	27.1627	27.391	27.4432	27.656	27.3932				cell part;extracellular organelle;membrane;organelle;vesicle	Apoptosis		9	9	9	22.6	22.6	22.6	55.262	0	38.163	75	227130000	135640000	147490000	126390000	58263000
Q920Q4	Vacuolar protein sorting-associated protein 16 homolog	Vps16	0.0347541	0.565901	-0.289075	0.818427	0.453771	1	0.107907	1.07766	0.0225566	0.494927	0.396981	1.31675	27.6235	27.7784	27.888	27.6782	28.039	28.2444	27.856	28.1983	27.8179	27.826	27.4602	27.58	27.9494	27.3551			biological regulation;cellular component organization;cellular process;endosome transport;establishment of localization;interspecies interaction between organisms;locomotion;multi-organism process;organelle organization;protein transport;regulation of organelle organization;regulation of transport;transport;vacuole organization;vesicle-mediated transport	cell part;endosome;intracellular membrane-bounded organelle;intracellular organelle;lysosome;macromolecular complex;membrane;organelle;protein complex;vacuole		Vps16_C;Vps16_N	15	15	15	23.1	23.1	23.1	94.927	0	35.485	102	274930000	297970000	248480000	184900000	65600000
Q8C190	VPS9 domain-containing protein 1	Vps9d1	0.0348835	0.481662	0.386882	1.30756	0.419918	1	0.144854	1.10562	0.137843	0.731713	-0.242029	0.845555	24.2391	24.561	24.8319	24.4991	23.8373	24.0463	24.2739	24.3263	24.2457	24.1082	24.8124	24.3698	24.3358	24.3134						VPS9	3	3	3	6.5	6.5	6.5	71.283	0.001007	3.1112	6	22802000	27254000	30145000	25017000	1067100
Q9Z1Q2	Phosphatidylserine lipase ABHD16A	Abhd16a	0.0349604	0.591611	-0.260021	0.835076	0.374173	1	-0.149667	0.901459	0.496819	0.915457	0.110354	1.07949	26.9768	26.964	27.0043	26.7836	27.3474	27.3307	27.1401	27.228	26.9148	27.1186	26.8715	26.93	27.5873	26.9018				cell part		Abhydrolase_5	12	12	12	20.6	20.6	20.6	63.085	0	18.263	45	123060000	150030000	141530000	111610000	51764000
Q6VNS1	NT-3 growth factor receptor	Ntrk3	0.034977	0.583272	0.269094	1.20505	0.339228	1	0.192789	1.14297	0.649907	0.930058	-0.076305	0.948484	25.6867	26.0674	25.8407	26.0373	25.7215	25.5581	25.6151	25.4831	25.8168	26.2543	25.6761	25.6964	25.3233	25.626			anatomical structure development;biological regulation;cell communication;cell differentiation;cell motility;cellular component movement;cellular metabolic process;cellular process;developmental process;interspecies interaction between organisms;locomotion;macromolecule metabolic process;macromolecule modification;metabolic process;multi-organism process;phosphorus metabolic process;primary metab…	cell part;cytoplasm;macromolecular complex;protein complex;receptor complex	Neurotrophin signaling pathway	I-set;LRR_8;LRRNT;Pkinase_Tyr	9	4	4	11.2	5	5	92.759	0	8.4941	6	54176000	75744000	69284000	53063000	14890000
P62301	40S ribosomal protein S13	Rps13	0.0351456	0.473972	-0.406751	0.75432	0.145251	1	-0.263982	0.832786	0.421642	0.881696	0.14277	1.10402	29.669	29.8649	29.5486	29.4204	30.1168	29.7603	30.2673	30.2683	29.7497	30.0883	29.7234	29.6023	30.2562	29.7783			biological regulation;biosynthetic process;cellular metabolic process;cellular process;macromolecule metabolic process;metabolic process;primary metabolic process;protein metabolic process;translation	cell part;extracellular organelle;intracellular membrane-bounded organelle;intracellular non-membrane-bounded organelle;intracellular organelle;macromolecular complex;membrane;nucleolus;nucleus;organelle;ribonucleoprotein complex;small ribosomal subunit;vesicle	Ribosome	Ribosomal_S13_N;Ribosomal_S15	12	12	12	51	51	51	17.222	0	59.668	196	922820000	1039900000	838030000	895210000	283920000
Q8VD04	GRIP1-associated protein 1	Gripap1	0.0354929	0.335709	0.959171	1.94419	0.124789	0.982096	0.358502	1.28209	0.0923589	0.499359	-0.600669	0.659448	25.9494	26.4106	25.5296	26.0914	24.5804	24.9464	24.672	24.7992	26.1824	25.5575	25.2683	25.6401	25.7687	25.9491				cell part;endosome;intracellular membrane-bounded organelle;intracellular organelle;organelle			8	8	8	12.9	12.9	12.9	92.714	0	13.688	32	77972000	107290000	61044000	49338000	8736900
Q8C739	Protein FAM110B	Fam110b	0.0365288	0.44473	0.527428	1.44136	0.354779	1	0.140562	1.10233	0.0763991	0.566919	-0.386865	0.76479	24.5226	24.689	25.002	24.7832	23.7619	24.1999	24.3432	24.0564	24.7477	24.2772	24.6933	24.6591	24.5423	24.8714				cell part;cytoplasm;intracellular membrane-bounded organelle;intracellular organelle;microtubule organizing center;mitochondrion;organelle		FAM110_C;FAM110_N	2	2	2	8.5	8.5	8.5	40.36	0	11.962	11	27153000	35916000	32280000	36818000	1835200
Q8CIP4	MAP/microtubule affinity-regulating kinase 4	Mark4	0.0365657	0.479783	0.400325	1.31981	0.863403	1	0.0234616	1.0164	0.0641617	0.568796	-0.376863	0.77011	28.7017	28.6091	28.5382	28.605	28.2594	27.7692	28.141	28.2955	28.6008	28.3382	28.8545	28.7574	28.303	28.6971			anatomical structure development;cellular component organization;cellular process;cytoskeleton organization;developmental process;organelle organization	cell part;cell projection;centrosome;cytoskeleton;intracellular non-membrane-bounded organelle;intracellular organelle;microtubule organizing center;neuron projection;organelle		KA1;Pkinase;UBA	18	16	16	31.5	27.8	27.8	82.643	0	38.93	85	490340000	444910000	493690000	407220000	49729000
Q78PY7	Staphylococcal nuclease domain-containing protein 1	Snd1	0.036992	0.731709	-0.116606	0.922355	0.800221	1	-0.0189898	0.986924	0.165173	0.886848	0.0976166	1.07	29.6099	29.7661	29.7567	29.734	29.7956	29.8012	29.798	29.9452	29.8265	29.8617	29.6576	29.6031	29.8835	29.6723			biological regulation;biosynthetic process;cell differentiation;cellular metabolic process;cellular nitrogen compound metabolic process;cellular process;developmental process;gene silencing;macromolecule metabolic process;metabolic process;nitrogen compound metabolic process;nucleobase-containing compound metabolic process;primary metabolic process;regulation of gene expression, epigenetic;RNA me…	cell part;cytoplasm;cytoplasmic membrane-bounded vesicle;extracellular organelle;intracellular membrane-bounded organelle;intracellular organelle;macromolecular complex;membrane;mitochondrion;nucleus;organelle;ribonucleoprotein complex;RNAi effector complex;vesicle		SNase;TUDOR	33	33	33	48	48	48	102.09	0	228.25	232	815180000	936720000	1159900000	966770000	196180000
Q9D8X2	Coiled-coil domain-containing protein 124	Ccdc124	0.0377111	0.434803	0.712481	1.63862	0.193567	0.709844	2.61289	6.11729	0.269541	0.549479	1.90041	3.73319	25.4192	25.7606	24.872	25.8847	24.2532	24.833	24.5188	25.0859	25.1674	19	25.3983	24.8564	26.1015	19			cell cycle;cell division;cellular process	cell part;cytoplasm;membrane;microtubule organizing center;midbody;plasma membrane		DUF1014	4	4	4	16.1	16.1	16.1	25.345	0.00098619	2.882	7	46033000	45711000	37594000	41466000	4710500
Q91YI0	Argininosuccinate lyase	Asl	0.0377522	0.465847	-0.481644	0.716161	0.79546	1	-0.0904807	0.93921	0.280895	0.71785	0.391163	1.31145	24.5474	24.5535	24.6375	24.5001	25.3754	24.9909	24.9709	25.3822	24.4871	25.7053	24.2734	24.4504	24.8208	24.0007			amine metabolic process;behavior;biosynthetic process;cellular amide metabolic process;cellular amino acid metabolic process;cellular ketone metabolic process;cellular metabolic process;cellular nitrogen compound metabolic process;cellular process;developmental process;macromolecule metabolic process;macromolecule modification;metabolic process;nitrogen compound metabolic process;nitrogen cycle m…	extracellular organelle;organelle;vesicle	Alanine, aspartate and glutamate metabolism;Arginine and proline metabolism	ASL_C2;Lyase_1	4	4	4	8.8	8.8	8.8	51.739	0	9.9841	7	26850000	27833000	21421000	12412000	14740000
O70435	Proteasome subunit alpha type-3	Psma3	0.0379144	0.378303	0.843822	1.7948	0.0628205	0.336	3.31081	9.92324	0.101999	0.408139	2.46699	5.52889	24.8702	24.2085	24.0293	24.6746	23.0759	23.3313	23.264	23.9146	24.4233	19	24.7086	23.9655	19	19			catabolic process;cellular metabolic process;cellular process;macromolecule metabolic process;metabolic process;primary metabolic process;protein metabolic process;proteolysis;proteolysis involved in cellular protein catabolic process	cell part;cytoplasm;cytosol;extracellular organelle;intracellular membrane-bounded organelle;intracellular organelle;macromolecular complex;nucleus;organelle;proteasome complex;protein complex;vesicle	Proteasome	Proteasome;Proteasome_A_N	2	2	2	6.7	6.7	6.7	28.405	0.0099357	1.7903	4	27363000	17482000	14360000	31329000	1905000
Q61335	B-cell receptor-associated protein 31	Bcap31	0.0379432	0.429565	0.707903	1.63343	0.112965	0.883321	0.43583	1.35269	0.410336	0.833125	-0.272072	0.828129	25.8502	25.572	25.8977	25.6888	24.5664	25.0758	24.6973	24.959	25.9228	24.6207	25.5017	25.6418	25.7186	25.099			biological regulation;cellular homeostasis;cellular ion homeostasis;cellular localization;cellular process;establishment of localization;Golgi vesicle transport;homeostatic process;localization;multicellular organismal process;protein transport;response to stimulus;signal transduction;transport;vesicle-mediated transport	cell part;cytoplasmic membrane-bounded vesicle;endoplasmic reticulum;intracellular membrane-bounded organelle;intracellular organelle;lipid particle;membrane;organelle;vesicle	Protein processing in endoplasmic reticulum		2	2	2	8.6	8.6	8.6	27.956	0.00037879	4.7268	13	76717000	16633000	21703000	50193000	6143200
Q8BM13	Noelin-2	Olfm2	0.0380514	0.195917	-2.78558	0.14503	0.155501	0.64831	-2.34272	0.197139	0.65875	0.88219	0.442865	1.3593	23.7326	19	19	19	22.929	22.2808	23.2571	23.9287	22.4481	19	23.0605	24.296	22.7444	23.5284			behavior;cellular process;establishment of localization;multicellular organismal process;neurological system process;protein transport;response to stimulus;secretion;transport	cell part;extracellular region;macromolecular complex;membrane;protein complex;receptor complex		Noelin-1;OLF	2	2	2	5.8	5.8	5.8	50.72	0.0010619	3.7605	5	17445000	0	0	0	1671500
Q9DC70	NADH dehydrogenase [ubiquinone] iron-sulfur protein 7, mitochondrial	Ndufs7	0.0383314	0.607295	0.248541	1.188	0.812463	1	0.0292036	1.02045	0.0881699	0.728854	-0.219337	0.85896	29.9987	30.1094	30.1466	30.3269	29.9489	29.8002	29.7289	29.8815	30.1248	29.7964	30.2694	30.1059	30.3079	30.1014			cellular component assembly;cellular component organization;cellular macromolecular complex assembly;cellular process;macromolecular complex assembly;protein complex assembly;protein complex biogenesis	cell body;cell part;cell projection;intracellular membrane-bounded organelle;intracellular organelle;macromolecular complex;membrane;mitochondrion;NADH dehydrogenase complex;neuron projection;neuronal cell body;organelle;protein complex	Alzheimer's disease;Huntington's disease;Oxidative phosphorylation;Parkinson's disease	Oxidored_q6	8	8	8	37.5	37.5	37.5	24.683	0	63.373	193	1134000000	927440000	1233400000	1651900000	228560000
P62305	Small nuclear ribonucleoprotein E	Snrpe	0.0385827	0.199902	4.54501	23.3445	0.176831	0.93107	0.493016	1.40738	0.0319325	0.212667	-4.05199	0.0602876	27.0648	25.6299	26.9256	26.2731	19	20.2544	19	25.4311	25.9561	26.233	26.1872	26.156	25.7875	25.5379			cellular component assembly;cellular component organization;cellular macromolecular complex assembly;cellular process;macromolecular complex assembly;molting cycle;multicellular organismal process;ribonucleoprotein complex assembly	cell part;cytosol;extracellular organelle;intracellular membrane-bounded organelle;intracellular organelle;macromolecular complex;nucleus;organelle;protein complex;ribonucleoprotein complex;small nuclear ribonucleoprotein complex;spliceosomal complex;vesicle	Spliceosome	LSM	2	2	2	25	25	25	10.803	0	5.6688	10	139750000	12778000	131670000	95159000	0
Q80VP9	Aspartate beta-hydroxylase domain-containing protein 2	Asphd2	0.0385829	0.504301	-0.339863	0.790116	0.771984	1	0.0786736	1.05605	0.0760845	0.559713	0.418537	1.33657	24.9415	25.2322	25.6247	25.1392	25.6715	25.6383	25.4447	25.5509	25.5658	25.5441	24.9627	24.4774	25.5536	25.2409			cellular metabolic process;cellular process;macromolecule metabolic process;macromolecule modification;metabolic process;peptidyl-amino acid modification;primary metabolic process;protein metabolic process;protein modification process	cell part;membrane		Asp_Arg_Hydrox	4	4	4	13.1	13.1	13.1	38.731	0	10.296	18	39702000	54734000	83936000	50195000	10988000
Q6NVE9	Protein phosphatase PTC7 homolog	Pptc7	0.0387523	0.505122	-0.345323	0.787132	0.0993138	1	-0.143902	0.905068	0.154931	0.770551	0.201422	1.14983	23.9572	24.0794	24.1704	24.0288	24.6891	24.6713	24.2899	24.15	24.221	24.353	24.1769	24.0167	24.2857	24.1819				cell part;intracellular membrane-bounded organelle;intracellular organelle;mitochondrion;organelle		SpoIIE	2	2	2	9.7	9.7	9.7	33.048	0	10.39	4	19257000	20416000	20529000	19150000	5059800
Q9DB05	Alpha-soluble NSF attachment protein	Napa	0.0388751	0.45844	-0.451635	0.731214	0.789485	1	-0.0477514	0.967443	0.0261781	0.495433	0.403884	1.32306	28.9134	28.2564	28.8229	28.5976	29.3296	29.3058	28.7982	29.1741	28.8884	28.9681	28.6434	28.5369	28.4406	28.8876			anatomical structure development;biological regulation;cell communication;cell differentiation;cell-cell signaling;cellular component disassembly;cellular component organization;cellular process;developmental process;establishment of localization;localization;membrane fusion;membrane organization;protein transport;regulation of transport;signaling;transport	cell part;extracellular organelle;macromolecular complex;membrane;organelle;protein complex;vesicle			18	15	15	73.6	59	59	33.189	0	109.89	167	531750000	312030000	446890000	444210000	149520000
P15919	V(D)J recombination-activating protein 1	Rag1	0.0393755	0.403248	0.778944	1.71587	0.450978	1	0.247269	1.18696	0.107062	0.542183	-0.531675	0.691751	30.6368	31.2127	31.7553	31.2434	29.894	30.6349	30.5593	30.0483	31.029	30.2389	31.0107	30.9015	31.5045	31.1684			anatomical structure development;biological regulation;cell activation;cell differentiation;cellular component organization;cellular metabolic process;cellular nitrogen compound metabolic process;cellular process;chromatin modification;chromatin organization;chromosome organization;death;developmental process;DNA metabolic process;DNA recombination;histone modification;homeostatic process;immune …	cell part;intracellular membrane-bounded organelle;intracellular organelle;nucleus;organelle	Primary immunodeficiency	RAG1;zf-C3HC4;zf-RAG1	2	2	2	2.4	2.4	2.4	119.18	0.0071813	2.0046	51	1617700000	2298700000	3090500000	2305000000	388080000
Q9CQZ5	NADH dehydrogenase [ubiquinone] 1 alpha subcomplex subunit 6	Ndufa6	0.039966	0.673787	-0.203954	0.868168	0.352782	1	-0.107757	0.92803	0.371717	0.909531	0.0961967	1.06895	30.5857	30.785	30.8241	30.6407	31.0287	30.9934	30.7542	30.9873	30.8005	30.7493	30.8479	30.8404	31.0848	30.5607			metabolic process;response to chemical stimulus;response to oxidative stress;response to stimulus;response to stress	cell part;intracellular membrane-bounded organelle;intracellular organelle;macromolecular complex;membrane;mitochondrion;NADH dehydrogenase complex;organelle;protein complex	Alzheimer's disease;Huntington's disease;Oxidative phosphorylation;Parkinson's disease	Complex1_LYR	10	10	10	70.2	70.2	70.2	15.283	0	137.06	273	2009300000	2228800000	1860100000	1970700000	756880000
Q8VHI6	Wiskott-Aldrich syndrome protein family member 3	Wasf3	0.0399924	0.424634	0.666598	1.58733	0.0748246	1	0.233076	1.17534	0.100952	0.565102	-0.433522	0.740452	26.1479	25.7352	26.0572	25.9438	24.9726	25.1069	24.8153	25.6027	26.0247	25.7601	25.9142	25.7312	25.4869	25.7973			anatomical structure development;biological regulation;cell development;cellular component assembly;cellular component organization;cellular process;cytoskeleton organization;developmental process;organelle organization	cell part;cell projection;cytoplasm;cytoskeleton;extracellular organelle;intracellular non-membrane-bounded organelle;intracellular organelle;organelle;vesicle	Adherens junction;Fc gamma R-mediated phagocytosis	WH2	5	4	4	12.8	10.8	10.8	55.203	0	7.453	27	64314000	58856000	57868000	77245000	14193000
Q61234	Alpha-1-syntrophin	Snta1	0.0400757	0.378992	0.867857	1.82495	0.871652	1	0.0423518	1.02979	0.0558167	0.416419	-0.825505	0.564284	25.5454	25.8336	25.8096	25.8316	24.5634	24.4717	24.5198	24.821	26.0601	25.3295	25.5014	25.3379	26.455	25.9398			biological regulation;cellular component organization;cellular homeostasis;cellular ion homeostasis;cellular process;homeostatic process	cell part;cytoplasm;cytoskeleton;intracellular;intracellular non-membrane-bounded organelle;intracellular organelle;macromolecular complex;membrane;organelle;plasma membrane;protein complex		PDZ	7	7	7	18.3	18.3	18.3	53.664	0	52.351	16	45632000	46542000	42611000	42896000	12831000
Q922F4	Tubulin beta-6 chain	Tubb6	0.040164	0.2024	5.70745	52.2532	0.311817	0.885276	2.14541	4.42417	0.211113	0.469754	-3.56204	0.0846678	27.9638	27.0313	27.9744	28.7938	26.7582	27.4086	19	19	19	27.1828	28.2594	26.9496	19	27.5852			cellular component assembly;cellular component organization;cellular macromolecular complex assembly;cellular process;macromolecular complex assembly;protein complex assembly;protein polymerization	cell part;cytoplasm;extracellular organelle;intracellular membrane-bounded organelle;intracellular organelle;macromolecular complex;nucleus;organelle;protein complex;vesicle	Gap junction;Pathogenic Escherichia coli infection;Phagosome	Tubulin;Tubulin_C	18	2	2	43.8	6	6	50.09	0	102.66	10	7421200	3929800	7027000	13137000	119350000
Q9JLM8	Serine/threonine-protein kinase DCLK1	Dclk1	0.040274	0.673485	0.203081	1.15115	0.478599	1	0.0990119	1.07104	0.375668	0.901964	-0.10407	0.930405	31.7889	32.0607	31.8493	31.724	31.5451	31.5602	31.7029	31.6834	31.7718	31.8274	31.9314	31.9156	31.3731	31.7361			anatomical structure development;anatomical structure morphogenesis;biological regulation;cell growth;cell motility;cellular component morphogenesis;cellular component movement;cellular component organization;cellular process;developmental process;growth;locomotion;multi-organism process;response to biotic stimulus;response to stimulus;signal transduction			DCX;Pkinase	40	40	37	55.4	55.4	53	84.152	0	323.31	521	3932400000	5106900000	3892800000	3914300000	696580000
P80316	T-complex protein 1 subunit epsilon	Cct5	0.040294	0.673176	-0.203465	0.868462	0.0572088	1	0.206884	1.15419	0.000522617	0.415973	0.410349	1.32901	28.8854	29.0705	29.1184	29.2284	29.236	29.4111	29.3608	29.2039	29.1838	28.9423	28.6814	28.8693	29.0268	28.8241			cell recognition;cellular metabolic process;cellular process;macromolecule metabolic process;metabolic process;multi-organism process;primary metabolic process;protein folding;protein metabolic process;response to biotic stimulus;response to stimulus	cell body;cell part;centrosome;cytoplasm;extracellular organelle;intracellular non-membrane-bounded organelle;intracellular organelle;macromolecular complex;microtubule organizing center;nucleolus;organelle;protein complex;vesicle		Cpn60_TCP1	24	24	24	57.5	57.5	57.5	59.623	0	194.95	161	621120000	568300000	649050000	740090000	123810000
Q9CQA1	Trafficking protein particle complex subunit 5	Trappc5	0.0407741	0.201636	3.73616	13.3259	0.175168	0.703697	1.77731	3.42787	0.272215	0.548425	-1.95885	0.257233	24.9725	24.2898	25.2791	24.7481	19	19	19	23.3557	25.0754	24.1463	23.5975	19	24.6493	23.8322			cellular process;establishment of localization;transport;vesicle-mediated transport	cell part;endoplasmic reticulum;Golgi apparatus;intracellular membrane-bounded organelle;intracellular organelle;macromolecular complex;organelle;protein complex		TRAPP	2	2	2	21.3	21.3	21.3	20.795	0	5.7462	6	32619000	25062000	38856000	39699000	0
Q9Z218	Dipeptidyl aminopeptidase-like protein 6	Dpp6	0.0408493	0.467353	-0.435132	0.739626	0.329485	1	-0.200646	0.870161	0.286858	0.798517	0.234486	1.17649	28.2548	27.8265	28.0645	28.137	28.7781	28.884	28.1927	28.323	28.3515	28.3809	28.3198	28.2778	27.7178	28.6606			biological regulation;cellular component organization;cellular homeostasis;cellular ion homeostasis;cellular localization;cellular membrane organization;cellular process;homeostatic process;localization;membrane organization;plasma membrane organization;regulation of transport	cell part;extracellular organelle;macromolecular complex;membrane;organelle;plasma membrane;protein complex;vesicle		DPPIV_N;Peptidase_S9	16	16	15	26.6	26.6	25.5	91.259	0	40.404	114	328700000	286430000	267770000	213510000	104490000
Q9Z1Z2	Serine-threonine kinase receptor-associated protein	Strap	0.0409925	0.424155	0.620544	1.53745	0.00468633	0.313744	0.817739	1.76264	0.486242	0.872138	0.197195	1.14647	26.418	26.25	26.5777	26.5189	26.2176	25.859	25.1135	25.6397	26.2733	25.4799	25.9453	26.0149	25.5868	25.0903			biological regulation;cellular component assembly;cellular component organization;cellular macromolecular complex assembly;cellular process;homeostatic process;macromolecular complex assembly;multicellular organismal process;regulation of protein modification process;ribonucleoprotein complex assembly	cell part;cytoplasm;cytosol;intracellular membrane-bounded organelle;intracellular organelle;macromolecular complex;membrane;nucleoplasm;nucleus;organelle;plasma membrane;protein complex	RNA transport	WD40	10	10	10	42.3	42.3	42.3	38.442	0	21.203	35	76510000	71970000	87318000	89870000	18368000
Q5KU39	Vacuolar protein sorting-associated protein 41 homolog	Vps41	0.0411468	0.430323	-0.744602	0.596833	0.0843219	1	0.268614	1.20465	0.00521595	0.265659	1.01322	2.0184	25.33	25.6075	25.8138	25.6413	26.6903	26.0423	26.7781	26.712	25.491	25.5314	25.0261	25.2665	25.471	25.3526			biological regulation;cellular component organization;cellular membrane organization;cellular process;establishment of localization;Golgi vesicle transport;membrane fusion;membrane organization;organelle organization;protein targeting;protein transport;regulation of organelle organization;regulation of transport;transport;vacuolar transport;vacuole organization;vesicle-mediated transport	cell part;cytoplasmic membrane-bounded vesicle;cytoskeleton;cytosol;endosome;intracellular membrane-bounded organelle;intracellular non-membrane-bounded organelle;intracellular organelle;macromolecular complex;membrane;organelle;protein complex;vesicle		Clathrin	8	8	8	9.6	9.6	9.6	98.601	0	9.3488	17	56927000	88443000	85340000	66690000	19828000
Q3UIU2	NADH dehydrogenase [ubiquinone] 1 beta subcomplex subunit 6	Ndufb6	0.0411751	0.415695	-0.650469	0.637073	0.735703	1	-0.103057	0.931058	0.0306399	0.464574	0.547412	1.46146	28.8411	28.1498	27.9037	28.9183	29.2186	29.5214	28.8438	28.9317	29.003	28.1625	28.3199	29.0605	28.3902	28.8483			metabolic process	cell part;intracellular membrane-bounded organelle;intracellular organelle;macromolecular complex;membrane;mitochondrion;NADH dehydrogenase complex;nucleoplasm;organelle;protein complex	Alzheimer's disease;Huntington's disease;Oxidative phosphorylation;Parkinson's disease	NDUF_B6	7	7	7	53.1	53.1	53.1	15.515	0	42.714	41	502110000	247640000	153610000	395750000	259580000
Q14BI1	Slc24a2 protein	Slc24a2	0.0411986	0.418749	-0.691009	0.61942	0.533857	1	-0.25451	0.838272	0.307794	0.717466	0.436499	1.35332	25.7728	25.7473	26.1544	25.602	26.8756	27.0586	26.5664	26.2666	25.7835	26.1836	26.0928	26.0008	27.0867	25.0044			behavior;biological regulation;cellular homeostasis;cellular ion homeostasis;cellular process;establishment of localization;homeostatic process;ion transport;multicellular organismal process;neurological system process;response to stimulus;transmembrane transport;transport	cell part;membrane		Na_Ca_ex	7	7	7	14.5	14.5	14.5	78.976	0	12.058	20	12328000	39546000	49718000	75352000	43715000
Q9R269	Periplakin	Ppl	0.041238	0.42772	0.601867	1.51768	0.60264	1	-0.255687	0.837588	0.0952506	0.467806	-0.857555	0.551887	27.8749	27.8397	28.2551	27.9442	27.0805	26.8013	27.4478	27.9394	27.614	28.0625	29.77	27.9884	27.3275	28.0225			developmental process	cell part;cytoskeleton;extracellular organelle;intracellular membrane-bounded organelle;intracellular non-membrane-bounded organelle;intracellular organelle;mitochondrion;nucleus;organelle;vesicle		Plectin	2	2	2	0.9	0.9	0.9	204	0.0012949	2.7222	10	301010000	319380000	113280000	316260000	82464000
P56135	ATP synthase subunit f, mitochondrial	Atp5mf	0.0416257	0.52794	-0.323196	0.799297	0.0877687	1	-0.23231	0.85127	0.550618	0.924938	0.0908852	1.06502	30.8821	30.9725	31.0906	30.9171	31.4906	31.3844	31.2199	31.4542	30.8948	31.4273	31.0135	30.9273	31.3506	31.2706			biosynthetic process;cellular metabolic process;cellular nitrogen compound metabolic process;cellular process;establishment of localization;heterocycle metabolic process;hydrogen transport;ion transport;metabolic process;nitrogen compound metabolic process;nucleobase-containing compound metabolic process;nucleobase-containing small molecule metabolic process;nucleotide metabolic process;primary m…	cell part;extracellular organelle;intracellular membrane-bounded organelle;intracellular organelle;macromolecular complex;membrane;mitochondrion;nucleus;organelle;protein complex;proton-transporting two-sector ATPase complex;vesicle	Oxidative phosphorylation	WRW	5	5	5	37.5	37.5	37.5	10.344	0	46.156	103	2048600000	2008000000	2568600000	1872000000	898700000
Q8R0S2	IQ motif and SEC7 domain-containing protein 1	Iqsec1	0.0416362	0.491215	0.369764	1.29214	0.714097	1	0.0767096	1.05461	0.188987	0.717083	-0.293054	0.816172	32.6688	32.4963	32.6862	32.3659	31.8573	31.9823	32.2414	32.347	32.4947	32.1796	32.8929	32.7932	32.0323	32.49			biological regulation;cellular component organization;cellular process;cytoskeleton organization;organelle organization	cell part;cytoplasm;intracellular membrane-bounded organelle;intracellular organelle;membrane;nucleus;organelle	Endocytosis	Sec7	55	48	47	50.6	44.8	44.1	108.01	0	323.31	773	6961500000	6415900000	7172300000	5817700000	1055400000
Q9QUR7	Peptidyl-prolyl cis-trans isomerase NIMA-interacting 1	Pin1	0.0417078	0.462945	-0.447604	0.733259	0.567423	1	0.140921	1.10261	0.0172431	0.419974	0.588525	1.50371	24.3958	24.3627	24.3685	25.0013	24.9925	25.1139	25.0932	25.1178	24.5809	24.9785	24.2463	24.4271	24.3545	23.9492			biological regulation;cell cycle;cellular metabolic process;cellular process;macromolecule metabolic process;macromolecule modification;metabolic process;peptidyl-amino acid modification;primary metabolic process;protein metabolic process;protein modification process;regulation of protein modification process	cell part;cytoplasm;intracellular membrane-bounded organelle;intracellular organelle;midbody;nucleus;organelle	RIG-I-like receptor signaling pathway	Rotamase;WW	2	2	2	16.4	16.4	16.4	18.37	0.00037864	4.726	6	28296000	19033000	17787000	36206000	6654000
Q8CIE6	Coatomer subunit alpha	Copa	0.0419437	0.491547	-0.372448	0.772471	0.688088	1	0.0838293	1.05983	0.0375945	0.49836	0.456277	1.372	26.9438	27.4377	27.2632	27.0315	27.6144	27.5096	27.6179	27.7827	27.1829	27.5943	26.9247	26.6551	27.1293	27.1227			biological regulation;cellular process;establishment of localization;multicellular organismal process;protein transport;regulation of body fluid levels;secretion;transport;vesicle-mediated transport	cell part;cytoplasm;extracellular organelle;extracellular space;macromolecular complex;membrane;organelle;protein complex;vesicle	Neuroactive ligand-receptor interaction	Coatomer_WDAD;COPI_C;WD40	19	19	19	19.1	19.1	19.1	138.43	0	24.86	43	121570000	145830000	122600000	124000000	40569000
P0C0A3	Charged multivesicular body protein 6	Chmp6	0.0419899	0.58855	-0.268492	0.830187	0.653719	1	-0.103615	0.930698	0.427598	0.872931	0.164876	1.12107	25.2781	25.058	25.2303	25.4605	25.6318	25.5733	25.2458	25.5926	25.5828	25.407	25.3912	25.2263	24.8158	25.9615			cellular component organization;cellular process;establishment of localization;nucleus organization;organelle organization;protein transport;transport;vacuolar transport	cell part;extracellular organelle;macromolecular complex;membrane;organelle;protein complex;vesicle	Endocytosis	Snf7	4	4	4	20.5	20.5	20.5	23.415	0	7.4548	26	41605000	37221000	37220000	33135000	11230000
Q64516	Glycerol kinase	Gk	0.0423292	0.502976	-0.357103	0.780731	0.165299	1	-0.297606	0.813602	0.692417	0.947391	0.0594978	1.0421	28.5285	28.3371	28.6617	29.0057	28.8891	29.0816	28.7902	29.1406	29.0503	28.7764	28.8053	29.0691	28.6363	29.3672			alcohol metabolic process;biological regulation;biosynthetic process;carbohydrate metabolic process;catabolic process;cellular lipid metabolic process;cellular metabolic process;cellular process;glycerol ether metabolic process;homeostatic process;lipid metabolic process;metabolic process;phosphorus metabolic process;primary metabolic process;small molecule metabolic process	cell part;cytosol;extracellular organelle;intracellular membrane-bounded organelle;intracellular organelle;membrane;mitochondrion;nucleus;organelle;vesicle	Glycerolipid metabolism;Plant-pathogen interaction;PPAR signaling pathway	FGGY_C;FGGY_N	20	20	20	38.1	38.1	38.1	61.227	0	91.757	180	359390000	345950000	466260000	717160000	121090000
P16675	Lysosomal protective protein	Ctsa	0.0423294	0.463792	-0.484995	0.714499	0.887403	1	0.0492196	1.03471	0.148538	0.568523	0.534215	1.44815	24.9318	25.1703	25.2193	25.2107	26.0464	25.6853	25.2235	25.877	25.2579	25.8783	24.88	24.3343	25.6351	24.6913				cell part;extracellular organelle;intracellular membrane-bounded organelle;intracellular organelle;lysosome;membrane;mitochondrion;nucleoplasm;organelle;vacuole;vesicle	Lysosome;Renin-angiotensin system	Peptidase_S10	4	4	4	11	11	11	53.844	0	17.528	19	32607000	51508000	40190000	45519000	15590000
Q6R0H7	Guanine nucleotide-binding protein G(s) subunit alpha isoforms XLas	Gnas	0.0423789	0.588097	-0.270189	0.829211	0.190508	1	-0.226381	0.854777	0.788984	0.966977	0.0438084	1.03083	28.4334	28.5113	28.6033	28.6676	28.6566	29.0251	28.7224	29.0481	28.668	28.6951	28.5286	28.5903	29.2699	28.8173			anatomical structure development;anatomical structure formation involved in morphogenesis;anatomical structure morphogenesis;biological adhesion;biological regulation;cell adhesion;cellular metabolic process;cellular nitrogen compound metabolic process;cellular process;developmental process;DNA metabolic process;DNA modification;energy reserve metabolic process;generation of precursor metabolites…	cell part;cell projection;cytoplasm;cytosol;extracellular organelle;intracellular membrane-bounded organelle;intracellular organelle;macromolecular complex;membrane;neuron projection;nucleus;organelle;protein complex;vesicle	Amoebiasis;Bile secretion;Calcium signaling pathway;Chagas disease (American trypanosomiasis);Dilated cardiomyopathy;Endocrine and other factor-regulated calcium reabsorption;Gap junction;Gastric acid secretion;GnRH signaling pathway;Long-term depression;Melanogenesis;Pancreatic secretion;Salivary secretion;Taste transduction;Vascular smooth muscle contraction;Vasopressin-regulated water reabsorp…	G-alpha	16	14	9	14.9	13.5	9.3	121.5	0	69.066	180	357130000	383740000	382530000	437120000	110030000
Q8BGR6	ADP-ribosylation factor-like protein 15	Arl15	0.0424882	0.462917	-0.444716	0.734729	0.0311271	0.741626	-0.407334	0.754016	0.824304	0.969687	0.0373821	1.02625	23.8398	24.0376	24.3574	24.2698	24.9946	24.7184	24.4864	24.4022	24.2528	24.7785	24.4045	24.4988	24.2564	24.7292			biological regulation;cellular process;response to stimulus;signal transduction	cell part;extracellular organelle;intracellular;organelle;vesicle		Arf	2	2	2	14.7	14.7	14.7	22.905	0.0010691	3.8454	2	12902000	15844000	21850000	7372400	11709000
P68372	Tubulin beta-4B chain	Tubb4b	0.0426203	0.585425	-0.280596	0.823251	0.133109	1	-0.266613	0.831269	0.928303	0.989226	0.0139824	1.00974	37.6853	37.7739	37.8974	37.5484	38.2283	37.9363	37.8516	38.1781	37.8399	38.268	37.7302	37.7982	38.3278	37.8399			cellular component assembly;cellular component organization;cellular macromolecular complex assembly;cellular process;macromolecular complex assembly;protein complex assembly;protein polymerization	cell part;cytoplasm;extracellular organelle;intracellular membrane-bounded organelle;intracellular organelle;macromolecular complex;nucleus;organelle;protein complex;vesicle	Gap junction;Pathogenic Escherichia coli infection;Phagosome	Tubulin;Tubulin_C	39	39	2	86.1	86.1	3.6	49.83	0	323.31	5398	241000000000	248000000000	217000000000	239000000000	102000000000
O35927	Catenin delta-2	Ctnnd2	0.0427482	0.590974	0.271846	1.20735	0.899735	1	0.0158359	1.01104	0.0958367	0.708078	-0.25601	0.837401	30.7043	30.7432	30.5717	30.5685	30.3339	30.0688	30.3542	30.552	30.5665	30.4899	30.6664	30.8664	30.3222	30.8106			anatomical structure morphogenesis;behavior;biological adhesion;biological regulation;biosynthetic process;cell adhesion;cellular metabolic process;cellular nitrogen compound metabolic process;cellular process;developmental process;macromolecule metabolic process;metabolic process;multicellular organismal development;multicellular organismal process;neurological system process;nitrogen compound m…	cell part;intracellular membrane-bounded organelle;intracellular organelle;nucleus;organelle		Arm	46	41	41	47.8	44.2	44.2	135	0	323.31	378	1978400000	2205900000	1547900000	1684700000	313170000
Q07231;O88253;E9Q1L8;A0A087WQI7;E9PUT0;Q9CZ29;Q7TMC9;Q7M6W8;F6VWU8;F8VPP0;Q6PEP4;Q9Z117;Q6DFU8;E9PVW1;Q80ZX2;B1B1D3;E9Q0Q3;Q571J5;Q8C827	Zinc finger and SCAN domain-containing protein 21	Zscan21	0.0427802	0.430641	0.76305	1.69707	0.825328	1	-0.0560807	0.961874	0.0380999	0.414925	-0.81913	0.566784	26.1424	25.6704	25.9745	25.9866	24.7574	24.5508	25.0331	25.6234	25.9375	25.3217	26.4789	26.0916	26.289	25.8166			biological regulation;biosynthetic process;cellular metabolic process;cellular nitrogen compound metabolic process;cellular process;developmental process;macromolecule metabolic process;metabolic process;multicellular organismal development;multicellular organismal process;nitrogen compound metabolic process;nucleobase-containing compound metabolic process;primary metabolic process;RNA metabolic …	cell part;cytoplasm;intracellular;intracellular membrane-bounded organelle;intracellular organelle;membrane;nucleus;organelle		KRAB;SCAN;zf-C2H2	2	2	1	4	4	2.3	63.012	0.00099635	2.9667	12	78514000	58139000	58888000	68616000	6651000
Q8CGM1	Adhesion G protein-coupled receptor B2	Adgrb2	0.043007	0.693024	-0.165774	0.89145	0.505836	1	0.196998	1.14631	0.184318	0.679559	0.362772	1.28589	29.0329	29.102	29.0296	28.8824	29.1963	29.114	29.3524	29.0888	29.136	29.0098	29.3347	29.1669	27.9646	28.5978			anatomical structure development;biological regulation;developmental process	cell part;membrane;plasma membrane		7tm_2;DUF3497;GPS;TSP_1	25	25	24	20.6	20.6	20.1	169.86	0	99.459	212	514950000	519860000	536490000	603240000	153200000
Q64105	Sepiapterin reductase	Spr	0.043101	0.502696	-0.361564	0.778321	0.225932	1	-0.228845	0.853318	0.510093	0.900435	0.132719	1.09636	29.5685	29.6918	29.8005	29.6564	30.2865	30.3574	29.8849	29.9781	29.6973	30.1877	29.6695	29.6417	30.3395	29.7024			alcohol metabolic process;amine metabolic process;anatomical structure morphogenesis;biological regulation;biosynthetic process;cell morphogenesis;cellular amino acid metabolic process;cellular aromatic compound metabolic process;cellular component morphogenesis;cellular component organization;cellular ketone metabolic process;cellular metabolic process;cellular nitrogen compound metabolic proces…	cell part;cytoplasm;extracellular organelle;intracellular membrane-bounded organelle;intracellular organelle;mitochondrion;nucleoplasm;organelle;vesicle		adh_short	14	14	14	63.2	63.2	63.2	27.883	0	101.98	256	827910000	944210000	964610000	942740000	275530000
Q5IRJ6	Zinc transporter 9	Slc30a9	0.0433762	0.598499	-0.263346	0.833154	0.155149	0.93512	-0.443111	0.735547	0.493303	0.87488	-0.179765	0.882847	25.5137	25.6586	25.8433	25.7808	26.0378	25.7107	25.8695	26.0798	26.1145	25.9767	26.0216	25.7001	27.0708	25.9418			biological regulation;biosynthetic process;cellular metabolic process;cellular nitrogen compound metabolic process;cellular process;establishment of localization;ion transport;macromolecule metabolic process;metabolic process;nitrogen compound metabolic process;nucleobase-containing compound metabolic process;primary metabolic process;RNA metabolic process;transport	cell part;cytoplasm;cytoskeleton;intracellular membrane-bounded organelle;intracellular non-membrane-bounded organelle;intracellular organelle;nucleus;organelle		Cation_efflux	5	5	5	10.1	10.1	10.1	62.875	0	12.974	14	40397000	37835000	48504000	84899000	9363200
O35874	Neutral amino acid transporter A	Slc1a4	0.0436657	0.49227	0.370075	1.29242	0.625057	1	0.102647	1.07374	0.225923	0.751049	-0.267428	0.830799	26.8691	26.5018	26.7701	26.772	26.6331	26.4407	26.2553	25.9546	26.5074	26.6814	26.1537	26.8886	27.0531	26.3514			amine transport;amino acid transport;cellular process;establishment of localization;ion transport;multicellular organismal process;neurological system process;organic acid transport;transmembrane transport;transport	cell body;cell part;cell projection;cell surface;centrosome;cytoplasmic membrane-bounded vesicle;extracellular organelle;intracellular membrane-bounded organelle;intracellular non-membrane-bounded organelle;intracellular organelle;macromolecular complex;membrane;microtubule organizing center;neuron projection;neuronal cell body;organelle;protein complex;vesicle		SDF	5	5	5	14.8	14.8	14.8	56.061	0	15.69	30	119930000	109990000	126650000	161110000	15180000
A2AR02	Peptidyl-prolyl cis-trans isomerase G	Ppig	0.0437437	0.463149	0.483013	1.39766	0.221401	1	0.396714	1.31651	0.777183	0.948164	-0.0862999	0.941935	25.9762	26.3241	26.1019	26.3898	25.3017	25.4351	25.7524	26.1552	25.9304	25.101	25.7489	26.3132	25.4402	26.403			cellular metabolic process;cellular process;macromolecule metabolic process;macromolecule modification;metabolic process;peptidyl-amino acid modification;primary metabolic process;protein folding;protein metabolic process;protein modification process	cell part;cytoplasm;nucleoplasm		Pro_isomerase	6	6	6	9	9	9	88.324	0	9.741	16	62521000	36786000	62224000	93361000	16280000
P62482	Voltage-gated potassium channel subunit beta-2	Kcnab2	0.0438235	0.670015	-0.209551	0.864807	0.239751	1	0.103636	1.07448	0.0140356	0.554784	0.313187	1.24245	31.3983	31.3669	31.4366	31.3215	31.5348	31.5969	31.8672	31.4928	31.4601	31.5078	31.2967	31.2539	31.0793	31.2481			biological regulation;cell differentiation;cellular component assembly;cellular component organization;cellular metabolic process;cellular nitrogen compound metabolic process;cellular process;cofactor metabolic process;developmental process;heterocycle metabolic process;macromolecular complex assembly;metabolic process;multicellular organismal process;neurological system process;nitrogen compound…	cell part;cell projection;cytoskeleton;cytosol;intracellular non-membrane-bounded organelle;intracellular organelle;macromolecular complex;membrane;neuron projection;organelle;protein complex		Aldo_ket_red	23	23	20	70.8	70.8	61.6	41.021	0	323.31	377	3273000000	4066800000	3543700000	3377300000	669990000
Q8VDD9	PH-interacting protein	Phip	0.0439464	0.494219	-0.369089	0.774271	0.141495	1	-0.211897	0.863401	0.390219	0.871121	0.157192	1.11511	24.685	24.6578	24.5996	24.6358	25.029	25.1124	24.9187	25.4098	24.5983	24.5574	24.6308	24.9535	25.1384	25.002			biological regulation;cellular component organization;cellular process;cytoskeleton organization;establishment of localization;nuclear transport;nucleocytoplasmic transport;organelle organization;protein targeting;protein transport;regulation of cell cycle;regulation of mitotic cell cycle;regulation of organelle organization;regulation of protein modification process;response to chemical stimulus…	cell part;extracellular organelle;intracellular membrane-bounded organelle;intracellular organelle;nucleus;organelle;vesicle		Bromodomain;WD40	4	4	4	2.7	2.7	2.7	206.72	0	5.2443	17	46212000	24714000	36153000	46053000	3553600
P97772	Metabotropic glutamate receptor 1	Grm1	0.0442208	0.480489	-0.412438	0.751353	0.744454	1	-0.0939382	0.936962	0.269942	0.743403	0.318499	1.24703	25.526	25.9432	25.7392	25.8413	26.5419	26.4362	26.0367	25.8857	25.9737	25.9506	25.5229	25.7301	26.7082	25.37			behavior;biological regulation;cellular homeostasis;cellular ion homeostasis;cellular metabolic process;cellular process;homeostatic process;macromolecule metabolic process;macromolecule modification;metabolic process;multicellular organismal process;neurological system process;phosphorus metabolic process;primary metabolic process;protein metabolic process;protein modification process;protein ph…	cell body;cell part;cell projection;intracellular membrane-bounded organelle;intracellular organelle;membrane;neuron projection;neuronal cell body;nucleus;organelle	Calcium signaling pathway;Gap junction;Huntington's disease;Long-term depression;Long-term potentiation;Neuroactive ligand-receptor interaction	7tm_3;ANF_receptor;GluR_Homer-bdg;NCD3G	11	10	10	8.8	8.2	8.2	133.21	0	11.609	29	55404000	71289000	38794000	70189000	15735000
O35250	Exocyst complex component 7	Exoc7	0.0443294	0.537884	-0.316	0.803294	0.429465	1	-0.153154	0.899283	0.394415	0.870198	0.162846	1.11949	28.1136	28.1947	28.3241	27.9819	28.7144	28.5436	28.323	28.6025	28.1645	28.5599	28.1731	28.0197	28.7639	28.0172			cellular process;establishment of localization;exocytosis;protein transport;secretion;transport;vesicle-mediated transport	cell part;cytosol;macromolecular complex;membrane;microtubule organizing center;plasma membrane;protein complex	Insulin signaling pathway	Exo70	26	26	26	39.9	39.9	39.9	79.959	0	59.244	127	314350000	382810000	296590000	292810000	114060000
E9Q0B6	Dynein, axonemal, heavy chain 6	Dnah6	0.0443424	0.194553	3.92677	15.2081	0.727421	1	0.665547	1.58617	0.16639	0.443144	-3.26122	0.104298	26.2167	25.4252	25.804	25.9177	22.6677	19	19	26.6112	22.2918	25.9791	28.3801	26.8123	25.7053	19			cell motility;cellular component movement;cellular process;locomotion			AAA_5;AAA_8;DHC_N2;Dynein_heavy;MT	2	2	2	0.7	0.7	0.7	474.81	0.0052502	2.27	4	63855000	107720000	111180000	86203000	782700
P00493	Hypoxanthine-guanine phosphoribosyltransferase	Hprt1	0.0444366	0.21152	2.8628	7.27424	0.199252	0.728869	1.80747	3.50029	0.499979	0.764465	-1.05532	0.48119	23.8792	23.0635	22.9522	24.097	19	19	22.7119	23.464	19	19	23.8189	23.2974	19	23.3362			alcohol metabolic process;amine metabolic process;anatomical structure development;anatomical structure morphogenesis;behavior;biological regulation;biosynthetic process;catabolic process;cell activation;cell death;cell development;cell differentiation;cell proliferation;cellular aromatic compound metabolic process;cellular component assembly;cellular component morphogenesis;cellular component or…	cell part;cytoplasm;cytosol;extracellular organelle;organelle;vesicle	Drug metabolism - other enzymes;Purine metabolism	Pribosyltran	3	3	3	16.1	16.1	16.1	24.57	0.00099305	2.9289	5	7694400	5292600	4441500	17957000	0
Q7TNS2	MICOS complex subunit Mic10	Micos10	0.0444438	0.416804	-0.67467	0.626476	0.406833	1	-0.233733	0.850432	0.163256	0.615078	0.440937	1.35749	25.6053	25.7259	25.7123	26.3183	26.6595	26.9301	25.7869	26.8582	26.3409	26.2508	25.8113	26.2493	25.4626	26.5969				cell part;intracellular membrane-bounded organelle;intracellular organelle;membrane;mitochondrion;organelle		DUF543	2	2	2	19.7	19.7	19.7	8.5669	0.0019243	2.5942	6	78368000	47069000	59270000	111780000	8274100
Q6P5F9	Exportin-1	Xpo1	0.0444614	0.46581	-0.5042	0.705051	0.610848	1	-0.177156	0.884445	0.332524	0.764621	0.327044	1.25444	26.2224	26.5777	26.7833	26.3446	27.1403	27.3839	26.8768	27.068	26.4619	26.7919	26.1769	26.4306	27.6782	26.2182			biological regulation;cellular localization;cellular process;establishment of localization;localization;nuclear transport;nucleobase-containing compound transport;nucleocytoplasmic transport;protein targeting;protein transport;regulation of cell cycle;regulation of organelle organization;regulation of transport;response to chemical stimulus;response to drug;response to stimulus;ribosomal subunit …	cell part;cytoplasm;intracellular membrane-bounded organelle;intracellular non-membrane-bounded organelle;intracellular organelle;kinetochore;macromolecular complex;membrane;nucleolus;nucleoplasm;nucleus;organelle;protein complex;ribonucleoprotein complex	Ribosome biogenesis in eukaryotes;RNA transport	CRM1_C;IBN_N;Xpo1	12	12	12	15.4	15.4	15.4	123.09	0	25.199	35	81105000	111490000	125370000	94088000	39925000
Q7TNL5	Serine/threonine-protein phosphatase 2A 56 kDa regulatory subunit	Ppp2r5d	0.0450459	0.465621	-0.444261	0.734961	0.704116	1	-0.0772421	0.947868	0.149141	0.658032	0.367019	1.28969	27.0429	27.2175	27.1482	27.0156	27.5848	27.9393	27.6303	27.6191	26.978	27.3525	27.0904	27.033	27.7222	26.7184			biological regulation;cellular process;regulation of protein modification process;response to chemical stimulus;response to stimulus;signal transduction	cell part;macromolecular complex;protein complex;protein serine/threonine phosphatase complex		B56	11	10	7	22.5	20.5	13.6	69.122	0	30.901	44	178980000	236050000	170090000	122950000	43252000
O35143	ATPase inhibitor, mitochondrial	ATP5IF1	0.0455339	0.412551	0.681018	1.60327	0.602565	1	0.168185	1.12364	0.145515	0.565449	-0.512833	0.700845	30.0833	29.699	29.6961	30.3934	29.17	29.3895	28.5609	29.4875	29.8268	29.1684	29.9491	29.9246	29.4128	30.5439			biological regulation;biosynthetic process;cell differentiation;cellular component assembly;cellular component organization;cellular homeostasis;cellular ion homeostasis;cellular metabolic process;cellular nitrogen compound metabolic process;cellular process;cofactor metabolic process;developmental process;heterocycle metabolic process;homeostatic process;macromolecular complex assembly;metabolic…	cell part;cell surface;intracellular membrane-bounded organelle;intracellular organelle;macromolecular complex;mitochondrion;organelle;protein complex;proton-transporting two-sector ATPase complex		IATP	10	10	10	42.5	42.5	42.5	12.159	0	32.426	103	1318000000	1037100000	1040700000	1583300000	78201000
P63260	Actin, cytoplasmic 2	Actg1	0.0455545	0.733033	-0.115459	0.923088	0.193992	1	-0.118934	0.920868	0.965762	0.998576	-0.00347443	0.997595	37.1641	37.1262	37.2283	37.2461	37.2549	37.2982	37.3152	37.4365	37.2283	37.4973	37.1735	37.1641	37.4519	37.2637			biological adhesion;biological regulation;cell adhesion;cellular component organization;cellular process;cytoskeleton organization;homeostatic process;organelle organization	cell part;cytoskeleton;cytosol;extracellular organelle;extracellular space;intracellular membrane-bounded organelle;intracellular non-membrane-bounded organelle;intracellular organelle;macromolecular complex;membrane;nucleus;organelle;plasma membrane;protein complex;vesicle	Adherens junction;Arrhythmogenic right ventricular cardiomyopathy (ARVC);Bacterial invasion of epithelial cells;Dilated cardiomyopathy;Focal adhesion;Hypertrophic cardiomyopathy (HCM);Leukocyte transendothelial migration;Pathogenic Escherichia coli infection;Phagosome;Phototransduction - fly;Regulation of actin cytoskeleton;Shigellosis;Tight junction;Vibrio cholerae infection;Viral myocarditis	Actin	34	33	1	77.6	77.6	4.5	41.792	0	323.31	3201	149000000000	151000000000	144000000000	176000000000	52812000000
Q7M750	Opalin	Opalin	0.0455567	0.459487	-0.483186	0.715396	0.86153	1	0.0526889	1.0372	0.0617604	0.496485	0.535875	1.44982	26.2623	25.734	26.3275	26.5494	27	26.8933	26.4005	26.7155	26.498	26.1989	25.7071	25.6442	26.7608	26.517				cell part;Golgi apparatus;intracellular membrane-bounded organelle;intracellular organelle;membrane;organelle;plasma membrane			3	3	3	32.9	32.9	32.9	15.833	0	5.318	15	107350000	80090000	110220000	88783000	22838000
Q8VE37	Regulator of chromosome condensation	Rcc1	0.0457748	0.511759	-0.34606	0.786729	0.0843543	1	-0.268198	0.830356	0.657208	0.930547	0.0778625	1.05545	26.3701	26.508	26.4545	26.3965	26.8042	26.8559	26.6942	27.1504	26.3869	26.6451	26.2944	26.7321	26.9618	26.8688			biological regulation;cell division;cellular component assembly;cellular component organization;cellular process;chromosome segregation;cytoskeleton organization;mitosis;nuclear division;organelle assembly;organelle fission;organelle organization;regulation of cell cycle;regulation of mitotic cell cycle;regulation of organelle organization	cell part;chromosome;cytoplasm;intracellular membrane-bounded organelle;intracellular non-membrane-bounded organelle;intracellular organelle;membrane;nuclear chromosome;nucleoplasm;nucleus;organelle		RCC1	7	7	7	20.9	20.9	20.9	44.93	0	13.755	34	77275000	78416000	87498000	103620000	37802000
Q61137	Astrotactin-1	Astn1	0.0458511	0.528375	0.329194	1.25631	0.266124	1	0.191207	1.14172	0.445731	0.88667	-0.137988	0.908786	26.1254	25.9655	26.1503	25.9088	25.568	25.6637	25.3955	25.9304	25.9839	25.5586	25.9073	25.7596	25.6834	26.3225			behavior;biological adhesion;cell adhesion;cell motility;cellular component movement;cellular process;locomotion;response to stimulus	cell part;endosome;intracellular membrane-bounded organelle;intracellular organelle;organelle			10	10	10	10.6	10.6	10.6	144.88	0	13.88	24	81391000	76206000	64305000	64033000	18544000
P26039	Talin-1	Tln1	0.0458887	0.486224	-0.394269	0.760875	0.00832824	0.900058	-0.264134	0.832698	0.413156	0.887388	0.130135	1.0944	26.2685	26.2377	26.1308	26.3233	26.4292	26.9834	26.7794	26.7774	26.2022	26.4933	26.6674	26.5871	26.4105	26.3628			biological adhesion;biological regulation;cell adhesion;cell junction organization;cellular component assembly;cellular component organization;cellular process;cytoskeleton organization;organelle organization	cell part;cell projection;cell surface;cytoplasm;extracellular organelle;membrane;microtubule organizing center;organelle;plasma membrane;vesicle	Focal adhesion	FERM_M;FERM_N;I_LWEQ;IRS;Talin_middle;VBS	20	13	13	11	8	8	269.82	0	26.758	30	95979000	94368000	66244000	118830000	22998000
Q9WVE8	Protein kinase C and casein kinase substrate in neurons protein 2	Pacsin2	0.0460449	0.679757	-0.202817	0.868853	0.486246	1	-0.101785	0.931879	0.479282	0.915432	0.101031	1.07254	27.7442	27.7851	27.6708	27.6086	27.869	28.0711	27.8101	28.0491	27.7257	28.1019	27.5239	27.8285	28.0186	27.5469			anatomical structure morphogenesis;biological regulation;cellular component assembly;cellular component morphogenesis;cellular component organization;cellular membrane organization;cellular process;cytoskeleton organization;developmental process;endocytosis;establishment of localization;membrane invagination;membrane organization;organelle organization;regulation of transport;response to stimulus…	cell part;cytoplasm;cytoskeleton;cytosol;endosome;extracellular organelle;intracellular membrane-bounded organelle;intracellular non-membrane-bounded organelle;intracellular organelle;membrane;nucleoplasm;organelle;vesicle		FCH;SH3_9	13	10	10	27.2	24.1	24.1	55.832	0	25.089	83	239890000	243100000	222890000	218030000	55074000
Q6ZQ18	Protein EFR3 homolog B	Efr3b	0.0462092	0.584604	-0.289893	0.817963	0.184276	1	-0.324625	0.798506	0.857494	0.97236	-0.0347317	0.976213	27.6017	27.6598	27.9276	27.4063	28.013	28.0878	27.9835	27.9022	27.7071	28.1495	27.6076	27.6709	28.5655	27.8738							13	13	12	21.9	21.9	20.3	92.405	0	31.556	72	190030000	279840000	287290000	170540000	68015000
B2RWC4	Gm88 protein	Lrrc73	0.0464703	0.48161	0.406112	1.32511	0.194159	1	0.320672	1.24891	0.722431	0.936732	-0.0854404	0.942497	26.493	26.4671	26.4928	26.1823	26.2713	26.0601	26.289	25.8112	25.5818	25.9317	26.4815	26.3899	25.437	26.2006							5	5	5	13.9	13.9	13.9	33.455	0	12.159	26	101100000	98674000	92707000	90267000	19599000
P97315	Cysteine and glycine-rich protein 1	Csrp1	0.0466391	0.466348	-0.522906	0.695969	0.554197	1	-0.112906	0.924724	0.0149478	0.486007	0.41	1.32869	27.044	26.3245	26.9371	27.2079	27.0679	27.5571	27.5422	27.6735	27.1656	27.1957	26.8983	26.9265	26.8903	27.0455			biological adhesion;cell adhesion;cellular component organization;cellular process;cytoskeleton organization;organelle organization	cell part;cytoskeleton;extracellular organelle;intracellular membrane-bounded organelle;intracellular non-membrane-bounded organelle;intracellular organelle;nucleus;organelle;vesicle		LIM	8	8	8	64.2	64.2	64.2	20.583	0	22.249	46	190050000	79340000	151120000	173150000	34640000
P59708	Splicing factor 3B subunit 6	Sf3b6	0.0473915	0.467226	-0.508916	0.70275	0.735956	1	-0.0530412	0.963902	0.0422961	0.502197	0.455875	1.37161	25.8104	25.5419	26.0495	26.0352	26.8794	26.2457	26.4767	26.3613	25.8778	26.1181	25.6133	25.7606	26.0482	26.0212			anatomical structure formation involved in morphogenesis;cellular metabolic process;cellular nitrogen compound metabolic process;cellular process;developmental process;macromolecule metabolic process;metabolic process;mRNA metabolic process;mRNA processing;nitrogen compound metabolic process;nucleobase-containing compound metabolic process;primary metabolic process;RNA metabolic process;RNA proce…	cell part;intracellular membrane-bounded organelle;intracellular organelle;macromolecular complex;nucleoplasm;nucleus;organelle;ribonucleoprotein complex;spliceosomal complex	Spliceosome	RRM_1	4	4	4	36.8	36.8	36.8	14.585	0	8.0797	7	73140000	54068000	76669000	83474000	32512000
Q8CJ67	Double-stranded RNA-binding protein Staufen homolog 2	Stau2	0.0474912	0.471177	0.43903	1.35569	0.958586	1	0.010375	1.00722	0.0559723	0.529563	-0.428655	0.742954	24.4328	24.2327	24.8143	24.3996	23.6228	24.0319	24.3253	23.8871	24.2871	24.1326	24.2166	24.4221	24.6123	24.9138			establishment of localization;transport	cell part;endoplasmic reticulum;intracellular membrane-bounded organelle;intracellular non-membrane-bounded organelle;intracellular organelle;macromolecular complex;membrane;nucleolus;organelle;protein complex		dsrm	3	3	3	6.8	6.8	6.8	62.535	0	7.8782	4	30988000	20453000	22798000	24193000	1548900
O55128	Histone deacetylase complex subunit SAP18	Sap18	0.0476363	0.439807	0.563381	1.47773	0.234324	1	0.175528	1.12938	0.126751	0.615066	-0.387853	0.764266	27.4532	27.3166	27.487	27.6401	26.664	26.3879	26.8606	27.0631	27.5785	26.9193	27.3328	27.4441	27.2505	27.5466			biological regulation;biosynthetic process;cellular metabolic process;cellular nitrogen compound metabolic process;cellular process;gene silencing;macromolecule metabolic process;metabolic process;mRNA metabolic process;mRNA processing;nitrogen compound metabolic process;nucleobase-containing compound metabolic process;primary metabolic process;regulation of gene expression, epigenetic;RNA metabo…	cell part;cytoplasm;nucleoplasm	mRNA surveillance pathway;RNA transport	SAP18	5	5	5	24.8	24.8	24.8	17.595	0	17.371	33	179990000	165000000	139060000	240840000	18641000
Q8BH44	Coronin-2B	Coro2b	0.0477498	0.679558	0.188029	1.13921	0.988155	0.997859	0.00127544	1.00088	0.0699112	0.759925	-0.186753	0.878581	31.9036	31.9851	31.889	31.7788	31.7255	31.5036	31.7802	31.6387	31.8575	31.8719	32.1252	31.9049	31.7695	31.7677			cellular component organization;cellular process;cytoskeleton organization;organelle organization	cell part;cytoplasm;cytoskeleton;intracellular non-membrane-bounded organelle;intracellular organelle;membrane;organelle		DUF1899;DUF1900;WD40	26	26	26	57.9	57.9	57.9	54.936	0	230.08	493	4444300000	4665000000	3702000000	3789000000	751960000
Q8K3Z9	Nuclear envelope pore membrane protein POM 121	Pom121	0.0478586	0.198222	5.22344	37.3604	0.259033	1	0.322969	1.2509	0.0342861	0.215771	-4.90047	0.033482	27.731	26.8638	27.6911	27.0992	19	19	19	26.4017	27.2124	26.7421	27.2958	27.3076	26.5371	27.2339			establishment of localization;nucleobase-containing compound transport;protein transport;transport	cell part;macromolecular complex;membrane;nuclear pore;protein complex	RNA transport		4	4	4	5.9	5.9	5.9	121.02	0	4.9992	4	438690000	136100000	174210000	162440000	1726200
P40142	Transketolase	Tkt	0.0479101	0.494271	-0.392653	0.761727	0.351855	1	0.189822	1.14062	0.00134453	0.365365	0.582475	1.49742	27.8407	27.4124	28.0441	28.192	28.2534	28.4384	28.2571	28.3148	28.061	27.6054	27.5169	27.5582	27.6387	28.0932			alcohol metabolic process;biological regulation;biosynthetic process;carbohydrate metabolic process;cellular aldehyde metabolic process;cellular metabolic process;cellular process;metabolic process;primary metabolic process;small molecule metabolic process	cell part;extracellular organelle;intracellular membrane-bounded organelle;intracellular organelle;nucleoplasm;nucleus;organelle;vesicle	Biosynthesis of ansamycins;Carbon fixation in photosynthetic organisms;Pentose phosphate pathway	Transket_pyr;Transketolase_C;Transketolase_N	15	15	15	33.7	33.7	33.7	67.63	0	40.771	72	299090000	152370000	263570000	336590000	77891000
P52480	Pyruvate kinase PKM	Pkm	0.0482155	0.665087	-0.21643	0.860693	0.763291	1	-0.0524632	0.964289	0.311461	0.853144	0.163966	1.12036	31.8321	32.0674	32.1131	32.0959	32.0957	32.1311	32.2885	32.441	32.2613	32.0354	31.6813	32.0108	32.546	32.1244			alcohol metabolic process;anatomical structure development;carbohydrate metabolic process;catabolic process;cell death;cellular metabolic process;cellular process;death;developmental process;generation of precursor metabolites and energy;metabolic process;multi-organism process;primary metabolic process;response to biotic stimulus;response to stimulus;small molecule metabolic process	cell part;cell projection;cilium;cytoplasm;cytosol;extracellular matrix;extracellular organelle;intracellular membrane-bounded organelle;intracellular organelle;membrane;mitochondrion;nucleus;organelle;plasma membrane;vesicle	Carbon fixation in photosynthetic organisms;Glycolysis / Gluconeogenesis;Purine metabolism;Pyruvate metabolism;Type II diabetes mellitus	PK;PK_C	38	38	38	83.2	83.2	83.2	57.844	0	323.31	621	4176800000	4258300000	4202400000	5151600000	1335400000
P0DN34	NADH dehydrogenase [ubiquinone] 1 beta subcomplex subunit 1	Ndufb1	0.0483111	0.457975	-0.475525	0.719205	0.723486	1	-0.0639778	0.956623	0.0402244	0.516368	0.411547	1.33011	28.0655	27.6495	27.99	28.3658	28.7339	28.8601	28.3284	28.4121	28.1316	28.1123	28.1972	28.3668	27.968	27.764							3	3	3	49.1	49.1	49.1	6.954	0	19.833	102	288100000	219180000	193950000	338840000	141870000
P05067p40	HUMAN Amyloid-beta 1-40 protein	APP1-40	0.048603	0.318851	1.25723	2.39037	1.12077e-06	0.0853333	12.8308	7285.62	4.63488e-07	0.056	11.5736	3047.9	32.3694	31.6777	33.1388	32.8807	30.209	31.015	30.7429	32.0899	32.2402	19	19	22.429	19	19							4	2	1	100	70	30	4.3298	0	76.593	78	6109100000	4025400000	8313900000	8330400000	292690000
O55013	Trafficking protein particle complex subunit 3	Trappc3	0.0489233	0.463233	-0.502691	0.705789	0.69371	1	0.043342	1.0305	0.0259032	0.461252	0.546033	1.46007	24.2653	24.3454	24.1467	24.1189	24.8514	25.1299	24.9057	24.6636	24.0582	24.3683	24.3222	24.0228	23.9399	24.2254			cellular process;establishment of localization;Golgi vesicle transport;transport;vesicle-mediated transport	cell part;cytosol;endoplasmic reticulum;intracellular membrane-bounded organelle;intracellular organelle;macromolecular complex;membrane;organelle;protein complex		TRAPP	2	2	2	8.9	8.9	8.9	20.302	0.00098264	2.817	24	21929000	23404000	19219000	19910000	5329000
Q5DU25	IQ motif and SEC7 domain-containing protein 2	Iqsec2	0.0491481	0.657691	0.221995	1.16635	0.593229	1	0.177366	1.13082	0.878961	0.971622	-0.0446293	0.969539	32.819	32.7529	32.8751	32.5961	32.3921	32.3634	32.6292	32.6057	32.7036	32.6082	33.044	32.9823	31.5263	32.7563			biological regulation;cellular component organization;cellular process;cytoskeleton organization;organelle organization	cell part;cytoplasm;intracellular membrane-bounded organelle;intracellular organelle;nucleus;organelle	Endocytosis	Sec7	77	77	70	57.6	57.6	53.9	161.78	0	323.31	983	7967000000	7594500000	7185700000	6537200000	1338500000
Q9EPK7	Exportin-7	Xpo7	0.0493441	0.542686	-0.327209	0.797077	0.408479	1	-0.250589	0.840553	0.78709	0.95022	0.0766201	1.05454	26.48	26.6312	26.6759	26.5052	27.093	26.9376	26.7483	27.1804	26.5421	26.9514	26.4042	26.4479	27.7407	26.5742			establishment of localization;nuclear transport;nucleobase-containing compound transport;nucleocytoplasmic transport;protein targeting;protein transport;transport	cell part;cytoplasm;intracellular membrane-bounded organelle;intracellular organelle;macromolecular complex;nuclear pore;nucleus;organelle;protein complex		IBN_N	11	11	11	13.7	13.7	13.7	123.81	0	36.944	54	92853000	130680000	107060000	101010000	34800000
Q9WV55	Vesicle-associated membrane protein-associated protein A	Vapa	0.0493849	0.504333	0.360427	1.28381	0.118879	1	0.233891	1.176	0.40744	0.886601	-0.126536	0.916028	30.8584	30.4012	30.6489	30.6396	30.065	30.3194	29.971	30.4859	30.5418	30.1348	30.599	30.5904	30.2657	30.4257			biological regulation;cell death;cellular component organization;cellular localization;cellular membrane organization;cellular process;death;establishment of localization;Golgi vesicle transport;localization;membrane organization;organelle organization;response to stimulus;signal transduction;transport;vesicle organization;vesicle-mediated transport	cell part;cytoskeleton;endoplasmic reticulum;intracellular membrane-bounded organelle;intracellular non-membrane-bounded organelle;intracellular organelle;membrane;organelle;plasma membrane;vesicle	Tight junction	Motile_Sperm	16	16	15	57	57	57	27.855	0	81.671	240	2022800000	1402000000	1593400000	1768400000	262950000
Q6KAR6	Exocyst complex component 3	Exoc3	0.0494061	0.502242	-0.368771	0.774442	0.277082	1	-0.204907	0.867594	0.37685	0.868376	0.163864	1.12028	26.7131	26.6972	26.92	26.4395	27.2843	27.375	26.7909	26.9647	26.8912	27.1482	26.8525	26.6398	27.2558	26.5905			cellular localization;cellular process;establishment of localization;exocytosis;localization;protein transport;secretion;transport;vesicle-mediated transport	cell part;macromolecular complex;membrane;protein complex	Tight junction	Sec6	10	10	10	13.6	13.6	13.6	86.454	0	15.372	41	121810000	119330000	102410000	109960000	35588000
Q6NSW3	A-kinase anchor protein SPHKAP	Sphkap	0.0494691	0.47934	0.417357	1.33548	0.484788	1	0.167045	1.12276	0.33464	0.804878	-0.250311	0.840715	27.5779	27.5702	27.3249	27.4188	26.8993	26.5865	27.2335	27.106	27.4526	27.2011	27.0629	27.4168	26.8577	27.9911			biological regulation	cell part;extracellular organelle;intracellular membrane-bounded organelle;intracellular organelle;mitochondrion;organelle;vesicle		AKAP_110	16	16	16	11.8	11.8	11.8	185.09	0	36.25	47	223270000	257230000	166640000	176740000	26015000
B8QI36	Liprin-alpha 4	Ppfia4	0.0498571	0.639717	0.231492	1.17405	0.259682	1	0.191724	1.14213	0.783425	0.968765	-0.0397678	0.972811	28.4541	28.6088	28.5751	28.2738	28.1287	28.0954	28.2493	28.316	28.4427	28.4206	28.5734	28.4051	27.8569	28.175				synapse		SAM_1;SAM_2	34	22	22	36.3	25.8	25.8	133.71	0	87.277	98	358190000	542680000	360860000	396780000	61710000
O88745	Scrapie-responsive protein 1	Scrg1	0.0498926	0.421667	0.779157	1.71613	0.682268	1	0.123602	1.08945	0.055739	0.464898	-0.655555	0.634831	25.2936	24.927	24.7024	25.7558	23.8854	24.351	23.9464	24.6529	25.1171	24.6694	25.2789	24.5502	25.2635	25.4686				extracellular region		SCRG1	3	3	3	33.7	33.7	33.7	11.173	0	5.0623	15	29806000	23366000	35282000	40892000	6721700
Q8C570	mRNA export factor	Rae1	0.0507018	0.584077	-0.284933	0.82078	0.470456	1	0.430068	1.3473	0.194327	0.565308	0.715	1.64148	26.2939	26.3788	26.4649	26.2016	26.3638	26.772	26.5432	26.908	26.5116	26.7948	26.3101	26.1279	26.3172	23.9737			cellular process;response to chemical stimulus;response to stimulus	cell part;cytoplasm;intracellular membrane-bounded organelle;intracellular non-membrane-bounded organelle;intracellular organelle;nucleolus;nucleus;organelle	RNA transport	WD40	8	8	8	27.4	27.4	27.4	40.965	0	15.446	50	99758000	83675000	117380000	112620000	22124000
Q6NV83	U2 snRNP-associated SURP motif-containing protein	U2surp	0.0507646	0.540927	-0.325872	0.797816	0.469644	1	0.0983496	1.07055	0.0319589	0.496197	0.424221	1.34185	25.8355	25.8352	25.8052	25.7125	25.8138	26.4811	26.2291	26.1881	25.9027	25.9845	25.7863	25.3489	25.5539	25.82			cellular metabolic process;cellular nitrogen compound metabolic process;cellular process;macromolecule metabolic process;metabolic process;nitrogen compound metabolic process;nucleobase-containing compound metabolic process;primary metabolic process;RNA metabolic process;RNA processing	cell part;intracellular membrane-bounded organelle;intracellular organelle;nucleoplasm;nucleus;organelle	Spliceosome	cwf21;RRM_1;Surp	6	6	6	7.5	7.5	7.5	118.26	0	6.838	24	74490000	68790000	67504000	79679000	10389000
O88447	Kinesin light chain 1	Klc1	0.0508005	0.496686	0.379396	1.3008	0.163378	1	0.298093	1.22952	0.605998	0.927068	-0.081303	0.945204	27.3289	27.319	26.9936	27.7103	26.7112	27.0739	26.8051	27.1634	27.039	27.0663	27.3277	27.2163	26.598	26.9908			cellular component disassembly;cellular component movement;cellular component organization;cellular process;cytoskeleton-dependent intracellular transport;establishment of localization;transport	cell part;cell projection;cytoplasm;cytoplasmic membrane-bounded vesicle;cytosol;intracellular membrane-bounded organelle;intracellular organelle;macromolecular complex;membrane;neuron projection;organelle;protein complex;site of polarized growth;vesicle		Rab5-bind;TPR_1;TPR_2	16	10	10	28.8	17.9	17.9	61.449	0	18.397	44	202640000	140980000	124380000	217270000	33743000
P58281	Dynamin-like 120 kDa protein, mitochondrial	Opa1	0.0508493	0.631673	-0.239458	0.847064	0.235153	1	-0.206059	0.866902	0.843404	0.971656	0.0333988	1.02342	31.2879	31.29	31.4001	31.341	31.7558	31.7701	31.432	31.561	31.3272	31.6587	31.3202	31.2785	32.0223	31.3993			aging;anatomical structure formation involved in morphogenesis;biological regulation;cell activation;cell death;cellular component organization;cellular membrane organization;cellular process;death;developmental process;immune system process;membrane fusion;membrane organization;metabolic process;mitochondrion organization;multicellular organismal process;multi-organism process;neurological syste…	cell part;cell projection;cytoplasm;intracellular membrane-bounded organelle;intracellular organelle;membrane;mitochondrion;neuron projection;nucleoplasm;organelle	Toll-like receptor signaling pathway	LRR_1;LRR_5;LRR_7;LRR_8;TIR	56	56	56	57	57	57	111.34	0	323.31	565	2874200000	2414900000	2842200000	3003500000	782750000
Q8K406	Leucine-rich repeat LGI family member 3	Lgi3	0.0510044	0.459935	-0.497131	0.708514	0.0713864	0.717042	-0.604588	0.657659	0.725109	0.931597	-0.107457	0.928223	26.1364	26.002	25.9647	26.3843	26.9677	26.3273	26.5147	27.0719	26.2133	26.6101	26.3568	26.5571	27.6704	26.4378			biological regulation;cellular process;establishment of localization;exocytosis;regulation of transport;secretion;transport;vesicle-mediated transport	cell part;cell projection;cytoplasmic membrane-bounded vesicle;extracellular region;intracellular membrane-bounded organelle;intracellular organelle;neuron projection;organelle;vesicle		EPTP;LRR_8	9	9	9	21.7	21.7	21.7	61.817	0	22.672	37	64829000	87121000	40373000	51065000	39366000
B1AY10	Transcriptional repressor NF-X1	Nfx1	0.0512651	0.45858	0.497773	1.41203	0.922787	1	-0.017525	0.987926	0.0316925	0.473914	-0.515298	0.699648	24.5587	24.8447	25.0847	24.5602	24.1803	24.41	23.6804	24.5433	24.5075	24.3455	24.7928	24.911	24.7969	25.0517			biological regulation	cell part;cytoplasm;intracellular membrane-bounded organelle;intracellular organelle;membrane;nucleoplasm;nucleus;organelle;plasma membrane		R3H;zf-NF-X1	4	4	4	4.7	4.7	4.7	123.81	0.0025413	2.528	4	34861000	31387000	51046000	20847000	1141500
Q9Z1Q9	Valine--tRNA ligase	Vars1	0.0513996	0.584483	-0.288734	0.81862	0.579483	1	-0.0872172	0.941337	0.252423	0.813173	0.201517	1.14991	27.9229	27.8812	28.091	27.9199	28.3457	28.4141	28.1682	28.4103	27.8741	28.3283	27.9255	27.6994	28.3465	27.9052			amine metabolic process;cellular amino acid metabolic process;cellular ketone metabolic process;cellular metabolic process;cellular nitrogen compound metabolic process;cellular process;macromolecule metabolic process;metabolic process;nitrogen compound metabolic process;nucleobase-containing compound metabolic process;organic acid metabolic process;primary metabolic process;RNA metabolic process;…	cell part;intracellular membrane-bounded organelle;intracellular organelle;mitochondrion;organelle	Aminoacyl-tRNA biosynthesis;Valine, leucine and isoleucine biosynthesis	Anticodon_1;GST_C;GST_N;tRNA-synt_1	22	22	22	24.6	24.6	24.6	140.21	0	76.914	105	296550000	259500000	302100000	255340000	78265000
Q8K207	Uncharacterized protein C1orf21 homolog	MGI:1916649	0.0516979	0.223396	3.14565	8.84981	0.147361	0.836104	-0.596343	0.661429	0.0154455	0.165333	-3.74199	0.0747393	24.0604	24.2276	23.7276	24.2576	19	19	23.5213	19	24.0919	23.5238	24.6694	25.2682	24.7071	25.1546						DUF4612	2	2	2	17.4	17.4	17.4	13.882	0	9.214	5	26215000	19105000	9899500	19702000	0
F6W8I0	YjeF N-terminal domain-containing protein 3	Yjefn3	0.0518074	0.480854	-0.412862	0.751132	0.502812	1	0.826108	1.7729	0.264797	0.569966	1.23897	2.3603	23.7269	23.8904	23.6912	24.2634	24.1678	24.0095	24.4741	24.6711	24.2066	24.0305	23.6325	24.5171	19	24.1542					Alzheimer's disease;Huntington's disease;Oxidative phosphorylation;Parkinson's disease	YjeF_N	5	5	5	22.7	22.7	22.7	27.016	0.0010373	3.4306	7	13675000	21950000	15085000	13976000	4441400
Q9CY58	Plasminogen activator inhibitor 1 RNA-binding protein	Serbp1	0.0521925	0.419406	0.697143	1.62129	0.774761	1	-0.0665988	0.954887	0.0451544	0.420268	-0.763741	0.588967	28.8476	28.8006	28.6413	28.5909	27.2808	27.851	27.855	28.2934	28.8346	28.2755	28.8179	28.6405	29.4565	28.743			biological regulation	cell part;cytoplasm;extracellular organelle;intracellular membrane-bounded organelle;intracellular organelle;membrane;nucleus;organelle;plasma membrane;vesicle		HABP4_PAI-RBP1	13	13	13	34.2	34.2	34.2	44.714	0	150.99	92	485200000	508620000	403790000	353260000	38071000
Q9DCC8	Mitochondrial import receptor subunit TOM20 homolog	Tomm20	0.0524327	0.501511	-0.363502	0.777275	0.159951	1	-0.140374	0.907284	0.190477	0.768268	0.223129	1.16726	26.4541	26.5159	26.5551	26.5653	27.1925	27.1411	26.8901	26.764	26.443	26.5826	26.883	26.4488	26.6199	26.7807			cellular process;establishment of localization;protein targeting;protein transport;transmembrane transport;transport	cell part;intracellular membrane-bounded organelle;intracellular organelle;macromolecular complex;mitochondrial envelope;mitochondrion;organelle;protein complex		MAS20	3	3	3	22.1	22.1	22.1	16.284	0	6.523	36	78686000	89758000	77538000	83523000	41224000
Q99LE6	ATP-binding cassette sub-family F member 2	Abcf2	0.0525202	0.634496	-0.238993	0.847337	0.983225	0.999333	-0.00416107	0.99712	0.175377	0.755636	0.234832	1.17677	27.6133	27.9466	27.5817	27.5003	28.0569	27.9113	27.7871	27.9356	27.8064	27.9588	27.4994	27.5489	28.0605	27.2555				cell part;intracellular membrane-bounded organelle;intracellular organelle;membrane;mitochondrion;organelle		ABC_tran	14	14	14	22.1	22.1	22.1	71.781	0	34.985	74	206780000	275210000	192220000	205160000	69330000
Q3UZ39	Leucine-rich repeat flightless-interacting protein 1	Lrrfip1	0.0527306	0.466985	-0.466684	0.723626	0.777915	1	-0.0661161	0.955206	0.133893	0.612793	0.400568	1.32003	24.5982	24.154	24.3913	24.5893	24.7	24.853	25.5098	24.8002	24.6364	24.7271	24.4551	23.9919	24.2764	25.0461			biological regulation;biosynthetic process;cellular metabolic process;cellular nitrogen compound metabolic process;cellular process;macromolecule metabolic process;metabolic process;nitrogen compound metabolic process;nucleobase-containing compound metabolic process;primary metabolic process;RNA metabolic process	cell part;cytoplasm;intracellular membrane-bounded organelle;intracellular organelle;membrane;nucleus;organelle;plasma membrane		DUF2051	4	3	3	7.5	5.9	5.9	79.248	0	5.9415	2	20787000	28954000	16808000	20008000	4238600
Q8BHJ7	Gamma-aminobutyric acid receptor subunit alpha-5	Gabra5	0.0532447	0.214	3.73569	13.3216	0.26259	0.838328	1.57107	2.97126	0.267507	0.542264	-2.16462	0.223041	25.0173	24.8539	25.2422	25.0878	19	24.7266	19	19	24.8465	19	24.4801	24.4275	25.3043	24.1843			anatomical structure development;behavior;biological regulation;cell communication;cell development;cell-cell signaling;cellular process;developmental process;multicellular organismal process;neurological system process;response to stimulus;response to stress;signal transduction;signaling	cell body;cell part;cell projection;macromolecular complex;membrane;neuron projection;protein complex;receptor complex	Neuroactive ligand-receptor interaction	Neur_chan_LBD;Neur_chan_memb	6	4	4	17.3	13.4	13.4	52.274	0	8.169	16	38479000	39783000	49474000	25581000	0
Q6NVF9	Cleavage and polyadenylation specificity factor subunit 6	Cpsf6	0.0537556	0.42036	0.739769	1.66991	0.0122407	0.605825	0.533007	1.44694	0.517222	0.872762	-0.206762	0.86648	25.6397	25.962	25.833	25.7174	25.2039	24.7275	24.1568	25.4207	25.7324	24.964	24.968	25.6258	25.4234	25.2939			cellular component assembly;cellular component organization;cellular metabolic process;cellular nitrogen compound metabolic process;cellular process;macromolecular complex assembly;macromolecule metabolic process;metabolic process;mRNA metabolic process;mRNA processing;nitrogen compound metabolic process;nucleobase-containing compound metabolic process;primary metabolic process;protein complex as…	cell part;intracellular membrane-bounded organelle;intracellular organelle;macromolecular complex;membrane;mRNA cleavage factor complex;nucleus;organelle;protein complex;ribonucleoprotein complex	mRNA surveillance pathway		4	4	4	11.4	11.4	11.4	59.152	0	20.35	17	61900000	62427000	67221000	63408000	10649000
Q9WUR2;Q78JN3	Enoyl-CoA delta isomerase 2, mitochondrial	Eci2	0.0537726	0.489308	-0.403351	0.7561	0.0863656	1	-0.274993	0.826454	0.508038	0.901766	0.128358	1.09305	25.046	24.9331	24.8493	24.7745	25.8738	25.1789	25.2126	25.2285	25.0265	25.3308	24.9724	24.8654	25.4757	25.2342			catabolic process;cellular ketone metabolic process;cellular lipid metabolic process;cellular metabolic process;cellular process;lipid metabolic process;metabolic process;organic acid metabolic process;primary metabolic process;small molecule metabolic process	cell part;intracellular membrane-bounded organelle;intracellular organelle;membrane;microbody;mitochondrion;nucleoplasm;organelle;peroxisome	Fatty acid metabolism;Peroxisome	ACBP;ECH	5	5	5	17.1	17.1	17.1	43.267	0	8.0468	18	25783000	38937000	22690000	48256000	11738000
Q9EPU0	Regulator of nonsense transcripts 1	Upf1	0.0541659	0.592569	-0.277516	0.82501	0.130902	1	-0.214849	0.861637	0.556565	0.932793	0.0626675	1.0444	28.1984	28.5316	28.4115	28.0671	28.7198	28.5093	28.6484	28.6762	28.3446	28.5912	28.3362	28.4218	28.7715	28.4642			biological regulation;biosynthetic process;catabolic process;cellular metabolic process;cellular nitrogen compound metabolic process;cellular process;DNA metabolic process;DNA repair;DNA replication;macromolecule metabolic process;metabolic process;mRNA metabolic process;nitrogen compound metabolic process;nucleobase-containing compound metabolic process;primary metabolic process;regulation of ge…	cell part;intracellular membrane-bounded organelle;intracellular non-membrane-bounded organelle;intracellular organelle;macromolecular complex;nucleoplasm;nucleus;organelle;protein complex;ribonucleoprotein complex	mRNA surveillance pathway;RNA transport	UPF1_Zn_bind	26	26	26	30.6	30.6	30.6	123.97	0	68.898	129	268670000	438630000	319000000	286030000	102280000
P10922	Histone H1.0	H1-0	0.0543061	0.585691	0.291794	1.22416	0.246188	1	-0.192625	0.875012	0.0165282	0.464089	-0.484419	0.714785	33.4203	33.1779	33.1681	33.349	33.1184	32.9402	32.6221	33.1951	33.0594	33.4645	33.2742	33.5629	33.1677	33.8879			cellular component assembly;cellular component organization;cellular macromolecular complex assembly;cellular process;chromatin organization;chromosome organization;macromolecular complex assembly;organelle organization	cell part;cytoskeleton;Golgi apparatus;intracellular membrane-bounded organelle;intracellular non-membrane-bounded organelle;intracellular organelle;macromolecular complex;nucleoplasm;nucleosome;nucleus;organelle		Linker_histone	12	12	12	38.1	38.1	38.1	20.861	0	37.657	338	12474000000	10670000000	9670100000	13034000000	2136400000
P26040;P26041;P26043	Ezrin	Ezr	0.0543185	0.54111	-0.332285	0.794277	0.396908	1	0.233288	1.17551	0.0331921	0.466152	0.565573	1.47998	24.6888	24.1552	24.615	24.6837	24.6697	24.9371	24.6924	24.9724	25.0683	24.8312	24.2052	24.2235	24.6189	23.633			anatomical structure development;biological adhesion;biological regulation;carbohydrate transport;cell adhesion;cell development;cell motility;cellular component assembly;cellular component movement;cellular component organization;cellular membrane organization;cellular metabolic process;cellular process;cytoskeleton organization;developmental process;endocytosis;establishment of localization;est…	apical part of cell;brush border;cell body;cell cortex;cell part;cell projection;cytoplasm;cytoskeleton;cytosol;extracellular organelle;extracellular space;filopodium;intracellular;intracellular membrane-bounded organelle;intracellular non-membrane-bounded organelle;intracellular organelle;macromolecular complex;membrane;microvillus;nucleolus;nucleus;organelle;plasma membrane;protein complex;vesi…	Gastric acid secretion;Leukocyte transendothelial migration;Measles;Pathogenic Escherichia coli infection;Regulation of actin cytoskeleton	ERM;FERM_C;FERM_M;FERM_N	5	5	5	8.4	8.4	8.4	69.406	0	7.5911	21	23211000	27754000	22480000	27277000	10861000
P62897	Cytochrome c, somatic	Cycs	0.0548531	0.515006	-0.357695	0.78041	0.317249	1	-0.212758	0.862886	0.336754	0.871539	0.144937	1.10568	29.2577	28.5684	28.934	29.1844	29.5375	29.4318	29.1613	29.3253	29.2631	29.3431	29.1426	29.1352	28.8069	29.5667			biological regulation;cell death;cellular metabolic process;cellular process;death;generation of precursor metabolites and energy;metabolic process;response to chemical stimulus;response to oxidative stress;response to stimulus;response to stress	cell part;cytosol;intracellular membrane-bounded organelle;intracellular organelle;mitochondrion;organelle	Alzheimer's disease;Amyotrophic lateral sclerosis (ALS);Apoptosis;Colorectal cancer;Huntington's disease;ko05152;p53 signaling pathway;Parkinson's disease;Pathways in cancer;Small cell lung cancer;Toxoplasmosis;Viral myocarditis	Cytochrom_C	10	10	10	60	60	60	11.605	0	127.75	146	792920000	424630000	516270000	612760000	175850000
Q8BJH1	Zinc finger C2HC domain-containing protein 1A	Zc2hc1a	0.0549466	0.538392	0.329936	1.25696	0.83167	1	-0.0354377	0.975736	0.0661843	0.570648	-0.365373	0.776268	29.2422	28.9861	29.3311	29.2253	28.8138	28.5223	28.7821	29.0322	29.1808	28.7965	29.42	29.5237	29.0976	29.3203							18	18	18	50.6	50.6	50.6	35.152	0	38.25	195	701220000	568580000	691800000	651140000	119300000
A2RTL5	Arginine/serine-rich coiled-coil protein 2	Rsrc2	0.0551374	0.243782	2.95065	7.73098	0.0674538	0.347623	2.87898	7.35632	0.96581	0.988631	-0.0716663	0.951538	24.1976	23.9379	23.4654	23.5361	19	23.7691	19	19	23.3988	19	23.8424	23.6839	19	19						SMAP	2	2	2	7.4	7.4	7.4	43.876	0.0012962	2.7282	1	21801000	14667000	14454000	14315000	0
Q9D2R0	Acetoacetyl-CoA synthetase	Aacs	0.0553687	0.446213	-0.612142	0.654224	0.0185387	0.807835	-0.341936	0.788982	0.31113	0.780349	0.270207	1.20598	22.827	23.0474	22.9008	22.8878	23.4756	23.9437	23.1265	24.1562	22.9375	23.453	23.091	23.0961	23.5088	23.1395			anatomical structure development;biological regulation;cell differentiation;cellular homeostasis;cellular ketone metabolic process;cellular lipid metabolic process;cellular metabolic process;cellular process;developmental process;homeostatic process;lipid metabolic process;metabolic process;organic acid metabolic process;primary metabolic process;regulation of transport;response to chemical stimu…	cell part;cytosol	Butanoate metabolism	AMP-binding	2	2	2	2.5	2.5	2.5	75.199	0.0066066	2.035	2	11688000	14196000	11044000	12312000	1573000
Q8CHU3	Epsin-2	Epn2	0.0553967	0.699401	-0.160943	0.89444	0.312615	0.951922	1.11974	2.17309	0.196269	0.499468	1.28069	2.42955	22.3878	22.2931	22.2372	22.4334	22.6244	22.5639	22.318	22.4931	22.4947	22.5976	22.6111	19	19	22.8819			anatomical structure development;biological regulation;cellular component organization;cellular membrane organization;cellular process;developmental process;embryo development;endocytosis;establishment of localization;membrane invagination;membrane organization;response to stimulus;signal transduction;transport;vesicle-mediated transport	cell part;Golgi apparatus;intracellular membrane-bounded organelle;intracellular organelle;macromolecular complex;nucleoplasm;organelle;protein complex	Endocytosis	ENTH	2	2	2	3.7	3.7	3.7	63.471	0.0010225	3.2929	2	5492600	4385000	3774300	5248200	1822200
Q9JHU4	Cytoplasmic dynein 1 heavy chain 1	Dync1h1	0.0554486	0.677407	-0.19307	0.874743	0.333611	1	-0.179199	0.883193	0.930261	0.988559	0.0138702	1.00966	32.9755	33.2276	33.1756	32.9831	33.3336	33.3646	33.2351	33.3913	33.093	33.3741	33.0618	33.0521	33.7903	33.07			cellular component assembly;cellular component movement;cellular component organization;cellular macromolecular complex assembly;cellular process;cytoskeleton organization;establishment of localization;macromolecular complex assembly;organelle organization;ribonucleoprotein complex assembly;transport	cell part;cell projection;centrosome;cytoplasm;extracellular organelle;filopodium;intracellular non-membrane-bounded organelle;intracellular organelle;macromolecular complex;membrane;microtubule organizing center;organelle;protein complex;vesicle	Phagosome;Vasopressin-regulated water reabsorption	AAA_5;AAA_8;DHC_N1;DHC_N2;Dynein_heavy;MT	223	223	223	51.6	51.6	51.6	532.04	0	323.31	2345	8892900000	10957000000	9434200000	9044600000	2455400000
Q7TMM9	Tubulin beta-2A chain	Tubb2a	0.0555256	0.463587	-0.485102	0.714447	0.143857	1	-0.337573	0.791371	0.565193	0.903944	0.147529	1.10767	33.098	32.9395	33.028	33.2995	34.1289	33.5712	33.3846	33.7303	33.0667	33.7601	33.1065	33.0211	33.3784	33.878			cellular component assembly;cellular component organization;cellular macromolecular complex assembly;cellular process;macromolecular complex assembly;protein complex assembly;protein polymerization	cell part;cytoplasm;extracellular organelle;intracellular membrane-bounded organelle;intracellular organelle;macromolecular complex;nucleus;organelle;protein complex;vesicle	Gap junction;Pathogenic Escherichia coli infection;Phagosome	Tubulin;Tubulin_C	36	3	3	81.8	12.4	12.4	49.906	0	77.139	284	9677300000	9467100000	9131600000	10547000000	4182700000
Q9Z0E0	Neurochondrin	Ncdn	0.0556679	0.647191	-0.232294	0.85128	0.775166	1	-0.0575809	0.960874	0.291377	0.846076	0.174714	1.12874	32.0319	32.3136	32.4435	32.0188	32.5607	32.4105	32.4535	32.4067	32.34	32.5155	32.0938	31.9043	32.7064	32.0778			biological regulation;cellular component organization;cellular process;homeostatic process	cell body;cell part;cell projection;cytosol;membrane;neuron projection;neuronal cell body			32	32	32	51.7	51.7	51.7	78.894	0	323.31	643	4843300000	5693000000	5871700000	3957900000	1362300000
Q99MR0	Actin-like protein 6B	Actl6b	0.0559642	0.679196	-0.185344	0.879439	0.841831	1	0.0109329	1.00761	0.0471554	0.734224	0.196277	1.14574	27.6596	27.693	27.6676	27.7245	28.1117	27.84	27.8474	27.6715	27.887	27.8304	27.5772	27.5929	27.689	27.6867			anatomical structure development;biological regulation;biosynthetic process;cellular component organization;cellular metabolic process;cellular nitrogen compound metabolic process;cellular process;chromatin modification;chromatin organization;chromosome organization;developmental process;DNA metabolic process;DNA recombination;DNA repair;histone modification;macromolecule metabolic process;macrom…	cell part;chromatin remodeling complex;DNA helicase complex;intracellular membrane-bounded organelle;intracellular non-membrane-bounded organelle;intracellular organelle;macromolecular complex;membrane;nucleolus;nucleus;organelle;plasma membrane;protein complex		Actin	9	9	9	25.6	25.6	25.6	46.891	0	20.337	40	217370000	250560000	259320000	237700000	62619000
A2AQ25	Sickle tail protein	Skt	0.0560723	0.679845	0.209079	1.15595	0.338499	1	-0.183372	0.880642	0.051579	0.548143	-0.392451	0.761834	30.4783	30.365	30.3041	30.3242	30.087	29.9018	30.2856	30.2142	30.3055	30.0335	30.5127	30.9954	30.5603	30.6545			anatomical structure development;developmental process	cell part;cytoplasm			48	48	48	29.6	29.6	29.6	213.03	0	189.86	358	1610300000	1452200000	1329400000	1335900000	231940000
Q8BIG7	Catechol O-methyltransferase domain-containing protein 1	Comtd1	0.0562676	0.481606	0.423038	1.34075	0.653185	1	0.087867	1.0628	0.129895	0.666348	-0.335172	0.79269	26.622	26.6547	27.0623	26.9617	26.2578	26.4821	25.9498	26.5535	26.7675	26.7437	26.5878	26.5958	27.278	26.4813				cell part;intracellular membrane-bounded organelle;intracellular organelle;mitochondrion;organelle		Methyltransf_3	3	3	3	14.1	14.1	14.1	28.96	0	17.242	37	181910000	114100000	141650000	103830000	17134000
Q3TPX4	Exocyst complex component 5	Exoc5	0.0568719	0.584473	-0.294776	0.815199	0.769734	1	-0.0743511	0.949769	0.372183	0.84466	0.220425	1.16508	27.6917	27.8138	28.0052	27.8018	28.4757	28.0578	28	28.2024	27.8787	28.29	27.7392	27.3762	28.4884	27.6186			cellular process;establishment of localization;exocytosis;membrane docking;protein transport;secretion;transport;vesicle-mediated transport	cell part;cytosol		Sec10	23	23	23	33.9	33.9	33.9	81.737	0	47.96	89	266390000	311760000	316370000	267110000	57256000
P51881	ADP/ATP translocase 2	Slc25a5	0.056872	0.539213	-0.335082	0.792739	0.236892	1	-0.279418	0.823923	0.801706	0.964679	0.0556641	1.03934	32.084	32.2368	32.4203	32.3884	32.8235	32.904	32.2931	32.6362	32.4304	32.5431	32.1031	32.4009	33.2079	32.5539			biological regulation;cellular process;chromosome segregation;establishment of localization;transmembrane transport;transport	cell part;extracellular organelle;intracellular membrane-bounded organelle;intracellular non-membrane-bounded organelle;intracellular organelle;macromolecular complex;membrane;mitochondrion;nucleus;organelle;protein complex;vesicle	Calcium signaling pathway;Huntington's disease;Parkinson's disease	Mito_carr	33	15	15	70.1	30.9	30.9	32.931	0	73.452	445	3899600000	5687200000	7011300000	6330900000	2177100000
P61514	60S ribosomal protein L37a	Rpl37a	0.0572368	0.497082	0.389657	1.31008	0.389082	1	-0.19112	0.875926	0.0395815	0.465379	-0.580777	0.668604	28.7541	28.7818	28.8213	28.8589	28.1538	28.1573	28.2262	28.6399	28.8946	28.6327	29.0361	28.6918	29.6593	28.9558			biosynthetic process;cellular metabolic process;cellular process;macromolecule metabolic process;metabolic process;primary metabolic process;protein metabolic process;translation	cell part;extracellular organelle;intracellular membrane-bounded organelle;intracellular organelle;macromolecular complex;nucleus;organelle;ribonucleoprotein complex;vesicle	Ribosome	Ribosomal_L37ae	5	5	5	58.7	58.7	58.7	10.275	0	16.509	51	500360000	505750000	415940000	451600000	76282000
Q9Z1P6	NADH dehydrogenase [ubiquinone] 1 alpha subcomplex subunit 7	Ndufa7	0.0573208	0.463422	0.494322	1.40866	0.473743	1	0.0988436	1.07091	0.0723171	0.567165	-0.395479	0.760237	30.1009	29.9638	30.2505	30.4598	29.4573	29.6534	29.2346	29.9333	30.2185	29.863	30.0601	30.0105	30.2157	30.3251			cellular metabolic process;cellular process;generation of precursor metabolites and energy;metabolic process	cell part;intracellular membrane-bounded organelle;intracellular organelle;macromolecular complex;mitochondrion;NADH dehydrogenase complex;organelle;protein complex	Alzheimer's disease;Huntington's disease;Oxidative phosphorylation;Parkinson's disease	CI-B14_5a	13	13	13	78.8	78.8	78.8	12.575	0	43.958	183	1255500000	1074000000	1400600000	1615500000	200800000
P47809	Dual specificity mitogen-activated protein kinase kinase 4	Map2k4	0.0575365	0.606539	-0.267203	0.830929	0.303066	1	-0.188596	0.877459	0.649932	0.931169	0.0786072	1.056	28.6927	28.6771	28.7562	28.45	28.95	28.9585	28.9758	29.103	28.5688	29.2602	28.8575	28.3992	28.9296	28.7166			biological regulation;cell death;cell growth;cellular metabolic process;cellular process;death;developmental process;growth;macromolecule metabolic process;macromolecule modification;metabolic process;phosphorus metabolic process;primary metabolic process;protein metabolic process;protein modification process;protein phosphorylation;regulation of DNA metabolic process;regulation of protein modifi…	cell part;cell projection;cytosol;intracellular membrane-bounded organelle;intracellular organelle;neuron projection;nucleus;organelle	Chagas disease (American trypanosomiasis);Epithelial cell signaling in Helicobacter pylori infection;ErbB signaling pathway;Fc epsilon RI signaling pathway;GnRH signaling pathway;MAPK signaling pathway;Toll-like receptor signaling pathway	Pkinase	12	12	12	40.6	40.6	40.6	44.113	0	45.436	100	401890000	437610000	513280000	335720000	169450000
Q63810	Calcineurin subunit B type 1	Ppp3r1	0.0577688	0.500828	-0.37181	0.772813	0.867338	1	0.0416979	1.02932	0.0949399	0.56506	0.413507	1.33192	30.0057	29.4889	29.9735	29.9644	30.4571	30.3419	30.4102	30.0172	29.9234	30.0841	30.0951	29.7649	29.098	30.0401			anatomical structure development;anatomical structure morphogenesis;biological regulation;carbohydrate metabolic process;cell development;cell differentiation;cell morphogenesis;cellular component morphogenesis;cellular component organization;cellular localization;cellular metabolic process;cellular process;developmental process;energy reserve metabolic process;establishment of localization;gener…	cell part;cytosol;macromolecular complex;membrane;plasma membrane;protein complex;protein serine/threonine phosphatase complex	Alzheimer's disease;Amyotrophic lateral sclerosis (ALS);Apoptosis;Axon guidance;B cell receptor signaling pathway;Calcium signaling pathway;ko05152;Long-term potentiation;MAPK signaling pathway;Natural killer cell mediated cytotoxicity;Oocyte meiosis;T cell receptor signaling pathway;VEGF signaling pathway;Wnt signaling pathway	EF-hand_1;EF-hand_7	9	9	9	47.1	47.1	47.1	19.3	0	160.54	149	1225400000	806150000	1024100000	1154900000	350580000
P46471	26S proteasome regulatory subunit 7	Psmc2	0.0579969	0.584656	-0.291379	0.817121	0.525284	1	-0.0891399	0.940083	0.241533	0.80586	0.202239	1.15048	27.5915	27.6508	27.7419	27.6557	27.8294	28.213	27.8744	28.1982	27.6415	28.1319	27.5467	27.5264	27.8868	27.6536			biological regulation;catabolic process;cell differentiation;cellular metabolic process;cellular process;developmental process;macromolecule metabolic process;metabolic process;primary metabolic process;protein metabolic process;proteolysis;proteolysis involved in cellular protein catabolic process	cell part;cytoplasm;intracellular membrane-bounded organelle;intracellular non-membrane-bounded organelle;intracellular organelle;macromolecular complex;membrane;nucleus;organelle;proteasome complex;protein complex;ribonucleoprotein complex		AAA	14	14	14	39.7	39.7	39.7	48.647	0	34.647	84	227590000	239810000	228210000	247460000	59545000
Q62277	Synaptophysin	Syp	0.0584421	0.526619	-0.345811	0.786866	0.12147	1	-0.130687	0.913397	0.174098	0.765166	0.215124	1.1608	31.0317	31.2082	31.1678	31.1282	31.6026	31.921	31.3359	31.3897	31.1498	31.3394	31.1412	31.1548	31.4512	31.2368			biological regulation;cell communication;cell-cell signaling;cellular component organization;cellular membrane organization;cellular process;endocytosis;establishment of localization;membrane invagination;membrane organization;response to chemical stimulus;response to stimulus;signaling;transport;vesicle-mediated transport	cell part;cell projection;cytoplasmic membrane-bounded vesicle;intracellular membrane-bounded organelle;intracellular organelle;macromolecular complex;membrane;neuron projection;organelle;protein complex;synapse;vesicle		MARVEL	5	5	5	16.2	16.2	16.2	34.024	0	14.071	141	2294100000	2638500000	2262700000	2567500000	1019900000
P62245	40S ribosomal protein S15a	Rps15a	0.0585666	0.431504	-0.656225	0.634537	0.389955	1	-0.374706	0.771263	0.302622	0.768065	0.281519	1.21547	27.1069	28.6648	27.7243	27.5178	28.3394	28.4567	28.4427	28.3772	28.4323	28.3873	27.371	28.2123	28.8656	27.8045			biological regulation;biosynthetic process;cellular metabolic process;cellular process;macromolecule metabolic process;metabolic process;multi-organism process;primary metabolic process;protein metabolic process;regulation of cell cycle;response to biotic stimulus;response to stimulus;translation	cell part;extracellular organelle;macromolecular complex;membrane;organelle;ribonucleoprotein complex;small ribosomal subunit;vesicle	Ribosome	Ribosomal_S8	6	6	6	45.4	45.4	45.4	14.839	0	23.023	52	122840000	257890000	185240000	246190000	105060000
Q9QX11	Cytohesin-1	Cyth1	0.0586579	0.428147	0.680106	1.60226	0.514103	1	0.176687	1.13029	0.174079	0.595898	-0.503419	0.705433	25.7336	26.0054	25.6091	25.7963	24.6407	24.5338	25.2584	25.1169	25.98	24.999	25.8846	25.5293	25.3668	26.2672			biological regulation;cellular process;establishment or maintenance of cell polarity	cell part;cytosol;membrane;plasma membrane		PH;Sec7	8	5	5	20.9	14.3	14.3	46.273	0	7.5381	10	53827000	85090000	64003000	37303000	8389500
P58871	182 kDa tankyrase-1-binding protein	Tnks1bp1	0.0586993	0.444873	0.599817	1.51552	0.422139	1	0.224484	1.16836	0.160708	0.663523	-0.375333	0.770928	26.3024	26.6024	26.0929	27.0336	25.3313	25.8133	26.137	25.8967	26.3618	26.2468	26.258	26.5556	25.6879	26.6683				cell part;chromosome;cytoplasm;cytoskeleton;intracellular non-membrane-bounded organelle;intracellular organelle;macromolecular complex;membrane;nucleoplasm;organelle;plasma membrane;protein complex;transcription factor complex			13	13	13	10.8	10.8	10.8	181.82	0	18.77	29	73693000	120530000	85551000	92256000	10949000
Q8BGY7	Protein FAM210A	Fam210a	0.0588522	0.432974	-0.879554	0.543535	0.241834	1	-0.34427	0.787706	0.081341	0.508394	0.535284	1.44923	24.6419	24.0316	23.3381	24.4886	25.1081	25.9727	24.7137	24.6601	24.5684	24.5391	24.3374	24.2915	24.6842	24.4944				cell part;intracellular membrane-bounded organelle;intracellular organelle;mitochondrion;organelle		DUF1279	3	3	3	11	11	11	31.599	0.0037712	2.3997	10	29627000	14346000	8250300	33041000	7156900
Q9CYN9	Renin receptor	Atp6ap2	0.058966	0.535558	0.342541	1.26799	0.145664	1	0.266371	1.20278	0.559572	0.926671	-0.07617	0.948573	25.6721	25.3317	25.0918	25.0844	24.6665	25.1099	24.946	24.934	25.1059	24.8267	25.1347	25.3412	24.9891	24.8514			anatomical structure morphogenesis;biological regulation;developmental process;hormone metabolic process;macromolecule metabolic process;metabolic process;pigmentation;primary metabolic process;protein maturation;protein metabolic process;proteolysis	cell body;cell part;cell projection;extracellular organelle;neuron projection;organelle;vesicle		Renin_r	2	2	2	6.3	6.3	6.3	39.091	0.0010331	3.3858	3	15424000	144270000	11716000	12286000	1834300
Q5HZI9	Solute carrier family 25 member 51	Slc25a51	0.0589695	0.637618	-0.238712	0.847502	0.863047	1	0.0198729	1.01387	0.0826568	0.693222	0.258585	1.1963	26.5925	26.4607	26.6079	26.5399	26.9508	27.0239	26.6828	26.5284	26.759	26.444	26.4187	26.3261	26.8657	26.5975			establishment of localization;transport	cell part;intracellular membrane-bounded organelle;intracellular organelle;membrane;mitochondrion;organelle		Mito_carr	9	9	9	42.3	42.3	42.3	33.689	0	35.486	15	92098000	100200000	114670000	149800000	20044000
Q61171	Peroxiredoxin-2	Prdx2	0.0590624	0.425582	-0.680099	0.624123	0.845558	1	-0.0509416	0.965306	0.0476398	0.463686	0.629157	1.54666	28.2706	27.4554	27.9432	28.3253	29.0429	29.2932	28.2989	28.6102	28.1484	28.2692	27.943	27.748	27.731	28.5566			anatomical structure development;biological regulation;catabolic process;cell activation;cell proliferation;cellular metabolic process;cellular process;developmental process;homeostatic process;immune system process;macromolecule metabolic process;macromolecule modification;metabolic process;multicellular organismal process;phosphorus metabolic process;primary metabolic process;protein metabolic …	cell part;extracellular organelle;intracellular membrane-bounded organelle;intracellular organelle;mitochondrion;organelle;vesicle		1-cysPrx_C;AhpC-TSA	8	8	8	37.4	37.4	37.4	21.778	0	21.193	80	332660000	199020000	253530000	348210000	134070000
Q7TPH6	E3 ubiquitin-protein ligase MYCBP2	Mycbp2	0.0591266	0.701898	-0.158623	0.89588	0.150717	1	-0.127276	0.915558	0.713632	0.970376	0.0313469	1.02197	27.752	27.8617	27.6678	27.7757	27.8779	28.011	27.767	27.8852	28.0735	27.9411	27.8245	27.8775	28.0946	27.7202			anatomical structure morphogenesis;biological regulation;biosynthetic process;cell morphogenesis;cellular component morphogenesis;cellular component organization;cellular metabolic process;cellular nitrogen compound metabolic process;cellular process;developmental process;locomotion;macromolecule metabolic process;metabolic process;nitrogen compound metabolic process;nucleobase-containing compoun…	cell part;cell projection;cytoskeleton;intracellular membrane-bounded organelle;intracellular non-membrane-bounded organelle;intracellular organelle;membrane;neuron projection;nucleus;organelle		Filamin;PHR;RCC1;SH3_3;zf-RING_2	32	32	32	8.5	8.5	8.5	521.23	0	38.62	77	163020000	176700000	204240000	387520000	53909000
Q9WTU0	Lysine-specific demethylase PHF2	Phf2	0.0594052	0.488179	-0.412042	0.751559	0.170163	1	-0.261163	0.834415	0.509198	0.889697	0.150879	1.11025	23.9987	23.886	24.0286	23.9827	24.3626	24.189	24.2224	25.009	24.1471	24.3193	23.9596	24.6065	23.8246	24.4656			anatomical structure development;biological regulation;biosynthetic process;cellular component organization;cellular metabolic process;cellular nitrogen compound metabolic process;cellular process;chromatin modification;chromatin organization;chromosome organization;developmental process;histone modification;macromolecule metabolic process;macromolecule modification;metabolic process;nitrogen com…	cell part;cytoplasm;intracellular membrane-bounded organelle;intracellular non-membrane-bounded organelle;intracellular organelle;kinetochore;macromolecular complex;nucleolus;nucleus;organelle;protein complex		JmjC;PHD	5	5	5	4.5	4.5	4.5	120.81	0.00037327	4.5317	10	22345000	26320000	21873000	37408000	2316200
Q8K004	Spermatogenesis-associated protein 2	Spata2	0.05942	0.46	-0.576446	0.670614	0.439423	1	0.928687	1.90354	0.175453	0.481118	1.50513	2.83851	23.4805	23.9751	24.1468	23.7877	24.2062	23.8463	24.9444	24.3499	24.7729	23.9563	24.1608	24.1885	23.2884	19				cell part;cytoplasm;intracellular membrane-bounded organelle;intracellular non-membrane-bounded organelle;intracellular organelle;nucleolus;nucleus;organelle			4	4	4	9.3	9.3	9.3	57.811	0.001018	3.2644	4	6128100	27819000	28496000	29193000	8198300
Q64133	Amine oxidase [flavin-containing] A	Maoa	0.0594239	0.490239	-0.399835	0.757945	0.219683	1	-0.243321	0.844799	0.433931	0.873938	0.156514	1.11459	27.3503	26.9887	27.1764	27.4843	27.7135	28.095	27.5312	27.2798	27.6292	27.5133	27.1589	27.2575	27.6113	27.9252			alcohol metabolic process;amine metabolic process;biological regulation;catabolic process;cellular aromatic compound metabolic process;cellular metabolic process;cellular nitrogen compound metabolic process;cellular process;metabolic process;neurotransmitter metabolic process;nitrogen compound metabolic process;small molecule metabolic process	cell part;intracellular membrane-bounded organelle;intracellular organelle;membrane;mitochondrion;organelle	Arginine and proline metabolism;Drug metabolism - cytochrome P450;Glycine, serine and threonine metabolism;Histidine metabolism;Isoquinoline alkaloid biosynthesis;Phenylalanine metabolism;Tryptophan metabolism;Tyrosine metabolism	Amino_oxidase	11	11	11	26.6	26.6	26.6	59.601	0	61.799	42	213020000	148080000	142780000	230270000	46830000
Q08460	Calcium-activated potassium channel subunit alpha-1	Kcnma1	0.0595983	0.539306	0.336377	1.26258	0.140495	1	0.294158	1.22617	0.827182	0.969348	-0.0422192	0.97116	29.8264	29.8523	30.0753	29.7164	29.351	29.3889	29.9316	29.3119	29.6728	29.4752	29.9781	29.8061	29.1513	29.4565			behavior;biological regulation;cell communication;cell differentiation;cell maturation;cell-cell signaling;cellular component assembly;cellular component organization;cellular homeostasis;cellular ion homeostasis;cellular process;circulatory system process;developmental maturation;developmental process;establishment of localization;excretion;homeostatic process;ion transport;macromolecular comple…	cell part;cytoplasm;endoplasmic reticulum;extracellular organelle;intracellular membrane-bounded organelle;intracellular organelle;macromolecular complex;membrane;organelle;plasma membrane;protein complex;vesicle	Pancreatic secretion;Salivary secretion;Vascular smooth muscle contraction	BK_channel_a;Ion_trans;TrkA_N	25	25	25	25.1	25.1	25.1	134.39	0	254.21	201	1359300000	920990000	998980000	807410000	134960000
O89112	Glutathione S-transferase LANCL1	Lancl1	0.0597884	0.543005	-0.341095	0.789442	0.908077	1	-0.0323335	0.977837	0.244187	0.733968	0.308762	1.23864	27.6109	27.9001	27.8901	27.4539	28.099	28.3606	27.9865	28.1089	27.7192	28.0558	27.5654	27.4166	28.452	27.2406				cell part;cytoplasm;extracellular organelle;intracellular membrane-bounded organelle;intracellular organelle;membrane;nucleus;organelle;vesicle		LANC_like	9	9	9	29.3	29.3	29.3	45.341	0	20.739	53	211210000	248350000	220920000	224850000	67877000
E9Q401	Ryanodine receptor 2	Ryr2	0.0599063	0.502747	-0.385463	0.765533	0.838198	1	-0.0436018	0.97023	0.122721	0.654796	0.341861	1.26739	28.6905	28.7676	29.1652	28.6529	29.2574	29.4656	29.4357	29.0325	28.8313	29.1935	28.918	28.3036	29.11	28.7882			anatomical structure development;anatomical structure morphogenesis;biological regulation;cell death;cell development;cellular homeostasis;cellular ion homeostasis;cellular process;death;detection of stimulus;developmental process;establishment of localization;homeostatic process;ion transport;multicellular organismal process;muscle contraction;regulation of transport;response to abiotic stimulus…	cell cortex;cell part;cytoplasm;endoplasmic reticulum;extracellular organelle;intracellular membrane-bounded organelle;intracellular organelle;macromolecular complex;membrane;organelle;plasma membrane;protein complex;vesicle	Arrhythmogenic right ventricular cardiomyopathy (ARVC);Calcium signaling pathway;Cardiac muscle contraction;Dilated cardiomyopathy;Hypertrophic cardiomyopathy (HCM);Long-term depression;Pancreatic secretion	Ins145_P3_rec;Ion_trans;MIR;RIH_assoc;RR_TM4-6;RYDR_ITPR;RyR;SPRY	58	58	54	14.8	14.8	14.1	564.81	0	115.28	225	457850000	463680000	612620000	417930000	157080000
Q8BX94	Oxysterol-binding protein-related protein 2	Osbpl2	0.0601725	0.398301	-0.992125	0.502737	0.0822764	0.886293	-0.387807	0.764291	0.173564	0.566212	0.604318	1.52026	23.9653	23.6262	23.9374	23.4695	25.3097	25.653	24.9653	23.5539	24.2268	24.1173	23.7033	24.1049	24.5877	24.1738			establishment of localization;lipid transport;transport			Oxysterol_BP	3	2	2	8.5	6.8	6.8	55.384	0.0003686	4.329	13	12503000	9990200	18028000	17297000	8424400
P49615	Cyclin-dependent-like kinase 5	Cdk5	0.0602511	0.518028	-0.360679	0.778798	0.380034	1	-0.105161	0.929701	0.138301	0.719721	0.255517	1.19376	29.3461	29.4061	29.4873	29.1573	29.9954	29.731	29.7526	29.8514	29.2189	29.6779	29.3174	29.3606	29.6302	29.2857			anatomical structure development;anatomical structure formation involved in morphogenesis;anatomical structure morphogenesis;behavior;biological adhesion;biological regulation;catabolic process;cell adhesion;cell communication;cell cycle;cell death;cell development;cell differentiation;cell division;cell motility;cell-cell signaling;cellular component assembly;cellular component morphogenesis;cel…	cell body;cell part;cell projection;cyclin-dependent protein kinase holoenzyme complex;cytoplasm;cytoskeleton;cytosol;filopodium;intracellular membrane-bounded organelle;intracellular non-membrane-bounded organelle;intracellular organelle;macromolecular complex;membrane;neuron projection;neuronal cell body;nucleus;organelle;protein complex;site of polarized growth;synapse	Alzheimer's disease;Axon guidance	Pkinase	14	14	13	55.5	55.5	52.7	33.288	0	74.28	202	601750000	569390000	727590000	519660000	246320000
Q8BG73	SH3 domain-binding glutamic acid-rich-like protein 2	Sh3bgrl2	0.0606442	0.422201	-0.721975	0.606267	0.0921387	0.831489	-0.463824	0.725062	0.408992	0.840158	0.258151	1.19595	26.5319	26.5048	26.0052	26.8621	27.4516	26.4497	27.9528	27.1743	26.9614	26.9991	26.8865	27.1505	26.3672	27.2957				cell part;extracellular organelle;nucleoplasm;organelle;vesicle		SH3BGR	5	5	5	62.6	62.6	62.6	12.255	0	22.287	34	114880000	107360000	96397000	118050000	43748000
Q810B6	Rabankyrin-5	Ankfy1	0.0607021	0.432493	-0.663218	0.631468	0.430549	1	-0.180416	0.882448	0.0823823	0.534499	0.482802	1.39745	23.8107	23.2452	23.9882	23.2261	24.6689	23.9145	23.9286	24.8289	23.8128	24.0586	23.5221	23.5436	23.6196	23.9958			biological regulation;cellular component organization;cellular localization;cellular membrane organization;cellular process;endocytosis;endosome transport;establishment of localization;Golgi vesicle transport;localization;membrane fusion;membrane invagination;membrane organization;organelle fusion;organelle localization;organelle organization;regulation of transport;transport;vacuolar transport;v…	cell part;cytoplasmic membrane-bounded vesicle;endosome;extracellular organelle;intracellular membrane-bounded organelle;intracellular organelle;macromolecular complex;membrane;organelle;protein complex;retromer complex;vesicle		Ank;Ank_2;BTB;FYVE	7	7	7	7.3	7.3	7.3	128.65	0	5.8317	9	10898000	17846000	4368500	10258000	4641100
Q6ZQ29	Serine/threonine-protein kinase TAO2	Taok2	0.0608607	0.497248	-0.395217	0.760375	0.993521	0.997775	-0.00131588	0.999088	0.0671259	0.562915	0.393901	1.31394	27.3662	27.2883	27.4802	27.074	27.8908	27.9805	27.8034	27.6314	27.1808	27.3831	27.4587	27.5524	26.858	27.2651			anatomical structure development;biological regulation;cell junction organization;cellular component assembly;cellular component organization;cellular metabolic process;cellular process;cytoskeleton organization;developmental process;macromolecule metabolic process;macromolecule modification;metabolic process;organelle organization;phosphorus metabolic process;primary metabolic process;protein me…	cell part;cell projection;cytoplasm;cytoplasmic membrane-bounded vesicle;cytoskeleton;intracellular membrane-bounded organelle;intracellular non-membrane-bounded organelle;intracellular organelle;macromolecular complex;membrane;neuron projection;nucleolus;nucleus;organelle;protein complex;receptor complex;vesicle	MAPK signaling pathway	Pkinase	17	14	14	13.7	11.2	11.2	139.3	0	29.353	59	184970000	170890000	205610000	143280000	45535000
P05067p42	HUMAN Amyloid-beta 1-42 protein	APP1-42	0.0609858	0.260343	2.47122	5.54514	0.0609858	0.345615	2.47122	5.54514	NaN	1	0	1	20.496	19	21.4468	24.9421	19	19	19	19	19	19	19	19	19	19							4	1	1	100	33.3	33.3	4.514	0.00097815	2.773	1	1451800	0	5099100	29572000	0
Q62108	Disks large homolog 4	Dlg4	0.0611521	0.538643	0.338145	1.26413	0.532586	1	0.193968	1.14391	0.62382	0.9156	-0.144177	0.904895	34.1895	34.0344	34.2324	33.9283	33.7417	33.2888	33.9129	33.9198	33.9268	33.9028	34.3439	34.3342	32.9476	33.9824			anatomical structure morphogenesis;behavior;behavioral interaction between organisms;biological regulation;cellular component assembly;cellular component morphogenesis;cellular component organization;cellular homeostasis;cellular ion homeostasis;cellular localization;cellular membrane organization;cellular metabolic process;cellular nitrogen compound metabolic process;cellular process;development…	cell part;cell projection;cytoplasm;cytoplasmic membrane-bounded vesicle;cytoskeleton;endoplasmic reticulum;intracellular membrane-bounded organelle;intracellular non-membrane-bounded organelle;intracellular organelle;macromolecular complex;membrane;neuron projection;organelle;plasma membrane;protein complex;receptor complex;synapse;vesicle	Huntington's disease	Guanylate_kin;MAGUK_N_PEST;PDZ;PDZ_assoc;SH3_2	53	50	47	64.6	61.2	59.9	80.471	0	323.31	1530	19394000000	17622000000	17995000000	17938000000	3726000000
P63080	Gamma-aminobutyric acid receptor subunit beta-3	Gabrb3	0.0612146	0.501865	-0.376763	0.770164	0.337972	1	0.135299	1.09832	0.0190592	0.461709	0.512061	1.42609	28.4094	28.5177	28.4818	28.2241	28.9409	28.9835	28.9854	28.7684	28.2468	28.6566	28.2539	28.2202	28.0196	28.2144			anatomical structure development;biological regulation;cell development;cellular homeostasis;cellular ion homeostasis;cellular process;developmental process;homeostatic process;multicellular organismal process;neurological system process;response to chemical stimulus;response to endogenous stimulus;response to stimulus;signal transduction	cell part;macromolecular complex;membrane;plasma membrane;protein complex;synapse	Neuroactive ligand-receptor interaction	Neur_chan_LBD;Neur_chan_memb	11	11	7	30.4	30.4	19.9	54.165	0	37.434	78	437820000	446900000	433160000	362610000	108870000
Q9CQF3	Cleavage and polyadenylation specificity factor subunit 5	Nudt21	0.0612298	0.462427	-0.533371	0.690938	0.382246	1	1.17348	2.25555	0.168314	0.472879	1.70685	3.26447	24.5611	24.3081	24.3977	24.6509	25.3585	25.1301	25.1006	25.251	24.2239	24.9914	19	24.4862	23.4079	24.6443			cellular component assembly;cellular component organization;cellular metabolic process;cellular nitrogen compound metabolic process;cellular process;macromolecular complex assembly;macromolecule metabolic process;metabolic process;mRNA metabolic process;mRNA processing;nitrogen compound metabolic process;nucleobase-containing compound metabolic process;primary metabolic process;protein complex as…	cell part;centrosome;intracellular membrane-bounded organelle;intracellular non-membrane-bounded organelle;intracellular organelle;macromolecular complex;microtubule organizing center;mRNA cleavage factor complex;nucleus;organelle;protein complex	mRNA surveillance pathway	NUDIX_2	3	3	3	10.6	10.6	10.6	26.24	0.00036996	4.3849	24	27249000	16964000	17728000	28168000	12898000
O88910	MAGUK p55 subfamily member 3	Mpp3	0.061361	0.495689	0.397791	1.31749	0.22265	1	-0.415854	0.749576	0.0275791	0.401239	-0.813645	0.568943	24.6966	24.3394	24.5798	24.3883	23.6475	24.0908	24.0083	24.2468	24.5229	24.3955	25.6634	24.2914	24.8739	25.3603						Guanylate_kin;L27;PDZ	3	3	3	8.5	8.5	8.5	64.4	0.00037078	4.4213	13	24979000	23425000	32663000	7414100	7719700
P32037	Solute carrier family 2, facilitated glucose transporter member 3	Slc2a3	0.0614489	0.478557	-0.459319	0.72733	0.010387	0.62444	-0.49548	0.709326	0.839505	0.971633	-0.036161	0.975247	28.685	28.3292	28.7267	28.9378	29.2722	29.5542	28.6303	29.1926	28.9956	29.1697	29.0255	28.9579	29.2883	29.3842			carbohydrate transport;cellular process;establishment of localization;hydrogen transport;ion transport;transmembrane transport;transport;vitamin transport	cell part;cytoplasm;extracellular organelle;membrane;organelle;plasma membrane;vesicle		Sugar_tr	10	10	10	17	17	17	53.478	0	103.16	66	569600000	338070000	575550000	655720000	173460000
P26049	Gamma-aminobutyric acid receptor subunit alpha-3	Gabra3	0.0614861	0.239929	3.73197	13.2872	0.449452	1	1.14101	2.20535	0.217309	0.496203	-2.59096	0.165976	24.8955	25.0973	25.551	25.0187	19	24.8919	19	19	25.1512	19	25.2399	25.0636	25.4461	25.2483			biological regulation;cellular process;response to stimulus;signal transduction	cell part;macromolecular complex;membrane;protein complex	Neuroactive ligand-receptor interaction	Neur_chan_LBD;Neur_chan_memb	4	3	3	10	8.3	8.3	55.397	0.0063196	2.0573	5	38327000	35461000	58205000	41051000	2687900
Q8VHR5	Transcriptional repressor p66-beta	Gatad2b	0.0620665	0.69358	0.173856	1.12807	0.27562	1	-0.181225	0.881954	0.0263796	0.543029	-0.355081	0.781826	33.7695	33.8823	34.1081	33.9029	33.6105	33.8717	33.7597	33.7076	33.7597	34.0516	34.0242	34.4815	33.724	34.2034			biosynthetic process;cellular component organization;cellular metabolic process;cellular nitrogen compound metabolic process;cellular process;chromatin modification;chromatin organization;chromosome organization;macromolecule metabolic process;metabolic process;nitrogen compound metabolic process;nucleobase-containing compound metabolic process;organelle organization;primary metabolic process;RNA…	cell part;macromolecular complex;nucleoplasm;protein complex		GATA	7	7	6	18	18	15.8	65.41	0	11.844	32	21269000000	19131000000	21169000000	23349000000	2790200000
Q61548	Clathrin coat assembly protein AP180	Snap91	0.0624209	0.680717	-0.206384	0.866707	0.249762	1	0.16972	1.12484	0.031031	0.528725	0.376104	1.29783	28.3041	28.2361	28.2836	28.265	28.7832	28.4563	28.4634	28.3032	28.387	28.3388	28.1368	28.2436	27.6514	28.1419			biological regulation;cell communication;cell-cell signaling;cellular component assembly;cellular component organization;cellular macromolecular complex assembly;cellular process;establishment of localization;macromolecular complex assembly;neurotransmitter transport;organelle organization;protein complex assembly;protein transport;regulation of transport;secretion;signaling;transport;vesicle org…	AP-type membrane coat adaptor complex;cell part;macromolecular complex;protein complex		ANTH	15	15	13	19	19	16.8	91.85	0	265.58	124	382540000	379000000	309580000	353590000	113740000
Q9CPS6	Histidine triad nucleotide-binding protein 3	Hint3	0.0624418	0.596821	0.275436	1.21036	0.589925	1	0.134789	1.09793	0.556884	0.906657	-0.140647	0.907112	25.6393	25.5904	25.831	25.6067	25.4686	25.7246	25.3014	25.1146	25.3479	25.7233	25.1265	25.5288	26.1996	25.082				cell part;cytoplasm;extracellular organelle;intracellular membrane-bounded organelle;intracellular non-membrane-bounded organelle;intracellular organelle;mitochondrion;nucleolus;organelle;vesicle			3	3	3	29.1	29.1	29.1	18.787	0	9.2172	20	49615000	52437000	58288000	54360000	10903000
Q61545	RNA-binding protein EWS	Ewsr1	0.0628723	0.235667	3.61061	12.2152	0.183412	0.731579	1.76637	3.40197	0.330339	0.596635	-1.84424	0.278502	25.3737	24.7304	24.895	24.8304	19	19	19	24.8421	24.8917	19	24.3147	24.2823	24.3489	24.0091			biological regulation;biosynthetic process;cellular metabolic process;cellular nitrogen compound metabolic process;cellular process;macromolecule metabolic process;metabolic process;nitrogen compound metabolic process;nucleobase-containing compound metabolic process;primary metabolic process;RNA metabolic process	cell part;cytoplasm;intracellular membrane-bounded organelle;intracellular non-membrane-bounded organelle;intracellular organelle;membrane;nucleolus;nucleoplasm;nucleus;organelle;plasma membrane		zf-RanBP	2	2	2	4.4	4.4	4.4	68.461	0.00037779	4.6981	8	57630000	30339000	18081000	37482000	0
Q9EQH3	Vacuolar protein sorting-associated protein 35	Vps35	0.0632033	0.585146	-0.305706	0.809046	0.870076	1	-0.0295475	0.979728	0.192919	0.72877	0.276158	1.21097	29.989	30.0532	30.0628	29.9553	30.5311	30.5475	30.1199	30.4547	29.9507	30.2356	29.9386	29.7889	30.54	29.7201			cellular metabolic process;cellular process;endosome transport;establishment of localization;macromolecule metabolic process;metabolic process;primary metabolic process;protein maturation;protein metabolic process;protein transport;transport;vesicle-mediated transport	cell part;cytosol;endosome;extracellular organelle;intracellular membrane-bounded organelle;intracellular organelle;macromolecular complex;membrane;organelle;protein complex;retromer complex;vesicle		Vps35	27	27	27	38.3	38.3	38.3	91.712	0	299.9	240	1038100000	1102900000	1031100000	1032200000	426200000
Q9R0N5	Synaptotagmin-5	Syt5	0.0633648	0.482931	0.442257	1.35873	0.073588	0.838989	0.412887	1.33135	0.889108	0.976286	-0.0293705	0.979848	25.7635	25.9023	26.1821	25.5736	25.2581	25.1102	25.8543	25.6655	25.1775	25.1298	25.8088	25.5095	25.6644	25.0998			biological regulation;cellular component organization;cellular membrane organization;cellular process;endocytosis;establishment of localization;exocytosis;membrane fusion;membrane invagination;membrane organization;neurotransmitter transport;organelle fusion;organelle organization;regulation of transport;secretion;transport;vesicle organization;vesicle-mediated transport	cell body;cell part;cell projection;cytoplasmic membrane-bounded vesicle;intracellular membrane-bounded organelle;intracellular organelle;membrane;neuron projection;neuronal cell body;organelle;plasma membrane;vesicle		C2	8	4	4	19.4	11.9	11.9	43.129	0	8.2231	11	71668000	68943000	72382000	57437000	8950400
P11798	Calcium/calmodulin-dependent protein kinase type II subunit alpha	Camk2a	0.0637713	0.684388	0.183749	1.13583	0.379685	1	0.175094	1.12904	0.961042	0.996753	-0.00865478	0.994019	37.3731	37.4442	37.5267	37.2897	37.2724	37.0369	37.2637	37.1453	37.4051	37.4051	37.4596	37.4442	36.6116	37.2461			biological regulation;cellular metabolic process;cellular process;establishment of localization;ion transport;macromolecule metabolic process;macromolecule modification;metabolic process;peptidyl-amino acid modification;phosphorus metabolic process;primary metabolic process;protein metabolic process;protein modification process;protein phosphorylation;regulation of transport;transport	cell part;intracellular membrane-bounded organelle;intracellular organelle;membrane;mitochondrion;nucleus;organelle	Calcium signaling pathway;ErbB signaling pathway;Gastric acid secretion;Glioma;GnRH signaling pathway;ko05152;Long-term potentiation;Melanogenesis;Neurotrophin signaling pathway;Olfactory transduction;Oocyte meiosis;Phototransduction - fly;Wnt signaling pathway	CaMKII_AD;Pkinase	45	45	32	70.1	70.1	54.2	54.114	0	323.31	2888	172000000000	192000000000	204000000000	161000000000	49678000000
P53810	Phosphatidylinositol transfer protein alpha isoform	Pitpna	0.0638936	0.462446	-0.506356	0.703998	0.13771	0.964434	-0.391938	0.762105	0.248471	0.877633	0.114418	1.08254	25.1259	24.2222	24.5607	25.3064	25.4778	25.4208	25.1934	25.2773	25.1814	25.1863	25.2915	25.3633	25.1867	24.9509			establishment of localization;transport	cell part;cytosol;extracellular organelle;organelle;vesicle		IP_trans	4	2	2	15.1	8.9	8.9	31.893	0	5.9876	4	35368000	23409000	19607000	38739000	13178000
Q9D0B0	Serine/arginine-rich splicing factor 9	Srsf9	0.064177	0.253879	3.02251	8.12578	0.414676	1	0.993063	1.99041	0.234304	0.506283	-2.02944	0.244949	24.0664	24.1399	23.8214	23.9714	19	19	19	24.1771	23.7091	24.3049	24.0239	19	23.5804	24.1243			biological regulation;cellular metabolic process;cellular nitrogen compound metabolic process;cellular process;macromolecule metabolic process;metabolic process;mRNA metabolic process;mRNA processing;nitrogen compound metabolic process;nucleobase-containing compound metabolic process;primary metabolic process;RNA metabolic process;RNA processing;RNA splicing	cell part;intracellular non-membrane-bounded organelle;intracellular organelle;nucleolus;nucleoplasm;organelle	Spliceosome	RRM_1	5	4	4	22.5	19.4	19.4	25.661	0.0010604	3.7317	9	8689900	29579000	25272000	16511000	0
Q8BYN5	FSD1-like protein	Fsd1l	0.0641794	0.245032	3.36532	10.3054	0.0890895	1	0.228542	1.17165	0.0492822	0.317419	-3.13678	0.113693	24.5016	24.5742	24.7066	24.5065	19	19	19	24.4846	24.5498	24.0947	24.2103	24.2857	24.5893	24.5383				cell part;intracellular		fn3;SPRY	2	2	2	5.1	5.1	5.1	56.885	0.0063253	2.078	1	25516000	26049000	25712000	23272000	3136500
P21126	Ubiquitin-like protein 4A	Ubl4a	0.064901	0.240621	4.02648	16.2964	0.569462	1	-0.13406	0.911264	0.0338498	0.219784	-4.16054	0.0559182	25.5665	25.4291	25.5847	26.0837	19	25.9111	19	19	25.2864	25.4741	25.3485	26.0493	26.1785	25.9499			cellular localization;cellular process;establishment of localization;localization;transport	cell part;cytosol;macromolecular complex;protein complex		ubiquitin	4	4	4	24.2	24.2	24.2	17.8	0.0037665	2.3878	5	57883000	69179000	47184000	97471000	2139000
P57776	Elongation factor 1-delta	Eef1d	0.0651046	0.48108	-0.449465	0.732314	0.502179	1	-0.11111	0.925875	0.161909	0.679223	0.338355	1.26431	27.1788	27.1533	27.4009	27.1986	28.0323	27.9411	27.6081	27.7904	27.04	27.7636	27.1343	27.0091	27.4569	27.3562			biological regulation;biosynthetic process;cellular metabolic process;cellular nitrogen compound metabolic process;cellular process;macromolecule metabolic process;metabolic process;nitrogen compound metabolic process;nucleobase-containing compound metabolic process;primary metabolic process;response to abiotic stimulus;response to stimulus;RNA metabolic process;signal transduction	cell part;cytoplasm;intracellular membrane-bounded organelle;intracellular non-membrane-bounded organelle;intracellular organelle;macromolecular complex;nucleolus;nucleus;organelle;protein complex		EF-1_beta_acid;EF1_GNE	7	7	7	33.1	33.1	33.1	31.293	0	19.067	49	217300000	156680000	166330000	196010000	73942000
Q9R0U0	Serine/arginine-rich splicing factor 10	Srsf10	0.065664	0.607655	0.270852	1.20652	0.188697	0.979642	0.433214	1.35024	0.562271	0.896121	0.162362	1.11912	27.0154	26.9808	26.6495	26.7965	26.5808	26.9139	26.5522	26.5139	26.3878	26.7704	25.8742	26.77	25.7528	26.9693			biological regulation;cellular component assembly;cellular component organization;cellular macromolecular complex assembly;cellular metabolic process;cellular nitrogen compound metabolic process;cellular process;establishment of localization;macromolecular complex assembly;macromolecule metabolic process;metabolic process;mRNA metabolic process;mRNA processing;nitrogen compound metabolic process;…	cell part;nucleoplasm	Spliceosome	RRM_1	5	5	5	22.1	22.1	22.1	31.3	0	26.707	18	161410000	171730000	126990000	124440000	8228100
O88485	Cytoplasmic dynein 1 intermediate chain 1	Dync1i1	0.0656759	0.701135	-0.1613	0.894219	0.234597	1	-0.243665	0.844597	0.654046	0.930877	-0.082365	0.944508	27.7788	27.7535	27.7233	27.7176	27.9649	27.8641	27.7246	28.1117	27.8577	28.1463	27.5592	27.6416	28.4115	28.1763			cellular component movement;cellular localization;cellular process;cytoskeleton-dependent intracellular transport;establishment of localization;localization;metabolic process;organelle localization;transport	cell part;endosome;intracellular membrane-bounded organelle;intracellular non-membrane-bounded organelle;intracellular organelle;kinetochore;macromolecular complex;organelle;protein complex;vesicle	Phagosome;Vasopressin-regulated water reabsorption	Dynein_IC2;WD40	14	14	12	35	35	31.8	70.724	0	77.281	77	265740000	305000000	333300000	271910000	40714000
Q8R366	Immunoglobulin superfamily member 8	Igsf8	0.0657177	0.632919	-0.252294	0.83956	0.138202	1	-0.312433	0.805283	0.755228	0.954506	-0.0601387	0.959172	29.0884	28.8519	28.9779	28.9789	29.3408	29.3913	28.9051	29.382	29.1136	29.4465	28.8908	28.9821	29.7728	29.3414			biological regulation	cell part;cell projection;extracellular organelle;membrane;neuron projection;organelle;plasma membrane;synapse;vesicle		V-set	12	12	12	33.7	33.7	33.7	65.01	0	81.742	154	659440000	531970000	456270000	521030000	143830000
P63276	40S ribosomal protein S17	Rps17	0.0657633	0.478703	0.471226	1.38629	0.825888	1	0.0413946	1.02911	0.11427	0.575549	-0.429831	0.742349	29.3479	29.4774	29.4007	29.2344	28.6555	28.3473	28.8929	29.1604	29.4133	29.0593	29.298	29.2757	29.911	29.0746			biological regulation;biosynthetic process;cellular component assembly;cellular component organization;cellular macromolecular complex assembly;cellular metabolic process;cellular nitrogen compound metabolic process;cellular process;homeostatic process;macromolecular complex assembly;macromolecule metabolic process;metabolic process;nitrogen compound metabolic process;nucleobase-containing compou…	cell part;extracellular organelle;macromolecular complex;membrane;organelle;ribonucleoprotein complex;small ribosomal subunit;vesicle	Ribosome	Ribosomal_S17e	9	9	9	65.9	65.9	65.9	15.524	0	323.31	88	699280000	746270000	692780000	632420000	96290000
Q03717	Potassium voltage-gated channel subfamily B member 1	Kcnb1	0.0658079	0.278293	2.517	5.7239	0.432352	1	0.806686	1.74919	0.231846	0.513346	-1.71031	0.305594	23.3235	23.0428	23.4472	22.8755	19	19	19	23.2304	23.046	23.1735	23.183	23.5699	22.9015	19			cellular component assembly;cellular component organization;cellular process;establishment of localization;ion transport;macromolecular complex assembly;protein complex assembly;transmembrane transport;transport	cell part;cell projection;macromolecular complex;membrane;neuron projection;protein complex	Taste transduction	BTB_2;Ion_trans;Kv2channel	2	2	2	2.9	2.9	2.9	95.59	0.0049551	2.2998	6	15221000	14671000	14628000	7222500	0
Q9CQR4	Acyl-coenzyme A thioesterase 13	Acot13	0.0661838	0.59714	-0.282333	0.82226	0.0863744	1	-0.264294	0.832606	0.913129	0.985781	0.0180397	1.01258	28.3833	28.477	28.4303	28.336	28.6802	28.9936	28.528	28.8699	28.3732	28.9492	28.5961	28.6137	28.8852	28.3104			cellular component assembly;cellular component organization;macromolecular complex assembly;metabolic process;protein complex assembly	cell part;cytosol;extracellular organelle;intracellular membrane-bounded organelle;intracellular non-membrane-bounded organelle;intracellular organelle;mitochondrion;nucleus;organelle;vesicle		4HBT	4	4	4	31.4	31.4	31.4	15.183	0	14.698	47	376020000	452610000	384670000	421130000	98462000
Q56A07	Sodium channel subunit beta-2	Scn2b	0.0662747	0.492862	-0.429649	0.742442	0.75653	1	-0.0694159	0.953024	0.033606	0.549432	0.360233	1.28363	26.24	25.3742	26.0883	25.6729	26.3492	26.3932	26.4657	26.148	26.0115	26.052	26.1204	26.0292	25.4924	25.8722			anatomical structure development;biological regulation;cellular process;developmental process;establishment of localization;ion transport;multicellular organismal process;muscle contraction;regulation of transport;response to chemical stimulus;response to stimulus;transmembrane transport;transport	cell part;macromolecular complex;protein complex		V-set	4	4	4	33.5	33.5	33.5	24.227	0	9.7858	20	81831000	47257000	72526000	57460000	22548000
Q8CAL5	Glypican-5	Gpc5	0.0667706	0.681265	-0.212174	0.863235	0.230969	1	0.290078	1.22271	0.0417148	0.485364	0.502252	1.41642	26.4218	26.5653	26.5053	26.3589	26.6702	26.7279	26.9401	26.5495	26.4872	25.769	26.5613	26.6598	25.7453	26.1282				cell part;extracellular matrix;extracellular space;proteinaceous extracellular matrix		Glypican	8	8	8	18.5	18.5	18.5	63.791	0	52.823	39	93423000	84672000	96663000	77644000	27546000
Q80TQ2	Ubiquitin carboxyl-terminal hydrolase CYLD	Cyld	0.0672436	0.680527	-0.211102	0.863877	0.367813	1	-0.099324	0.93347	0.200838	0.874162	0.111778	1.08056	28.2676	28.5183	28.4423	28.1278	28.5961	28.4149	28.6754	28.4352	28.629	28.6662	28.4558	28.3342	28.3643	28.3711			biological regulation;catabolic process;cell death;cellular metabolic process;cellular process;death;macromolecule metabolic process;macromolecule modification;metabolic process;primary metabolic process;protein metabolic process;protein modification by small protein conjugation or removal;protein modification process;proteolysis;proteolysis involved in cellular protein catabolic process;regulati…	cell part;centrosome;cytosol;intracellular non-membrane-bounded organelle;intracellular organelle;macromolecular complex;microtubule organizing center;midbody;nucleoplasm;organelle;protein complex	Osteoclast differentiation;RIG-I-like receptor signaling pathway	CAP_GLY;UCH	21	21	21	25.9	25.9	25.9	106.58	0	54.589	136	351090000	427320000	369470000	330480000	112160000
Q9EQP2	EH domain-containing protein 4	Ehd4	0.0674653	0.555012	-0.332907	0.793935	0.996832	0.998157	0.00143843	1.001	0.331214	0.761307	0.334345	1.26081	25.0517	25.276	25.4359	25.108	25.7661	25.7703	25.1739	25.6636	25.3801	25.4956	24.2146	25.119	26.0646	25.1885			biological regulation;cellular component assembly;cellular component organization;cellular membrane organization;cellular process;endocytosis;endosome transport;establishment of localization;macromolecular complex assembly;membrane invagination;membrane organization;protein complex assembly;regulation of protein modification process;regulation of transport;response to chemical stimulus;response t…	cell part;endoplasmic reticulum;extracellular organelle;intracellular membrane-bounded organelle;intracellular organelle;membrane;organelle;plasma membrane;vesicle	Endocytosis		11	7	7	20.7	13.5	13.5	61.48	0	8.9144	12	41560000	57920000	42193000	35237000	14620000
Q9D2R6	Cytochrome c oxidase assembly factor 3 homolog, mitochondrial	Coa3	0.067747	0.244062	-3.69701	0.0771063	0.0686075	0.338367	-3.55642	0.0849983	0.948266	0.980747	0.140584	1.10235	19	19	19	19	19	25.1543	25.3513	24.9795	19	25.3681	19	24.9405	24.4735	19			biological regulation;cellular component assembly;cellular component organization;cellular macromolecular complex assembly;cellular process;macromolecular complex assembly;protein complex assembly;protein complex biogenesis;regulation of organelle organization;regulation of translation	cell part;intracellular membrane-bounded organelle;intracellular organelle;mitochondrion;organelle		Coiled-coil_56	2	2	2	17.6	17.6	17.6	11.987	0.0010616	3.7547	3	0	13033000	13431000	11888000	5954400
Q4VA53	Sister chromatid cohesion protein PDS5 homolog B	Pds5b	0.0679384	0.591238	-0.296013	0.8145	0.515708	1	-0.139406	0.907893	0.399117	0.871702	0.156607	1.11466	25.691	26.0192	25.4657	25.6434	25.8635	25.9196	26.1273	26.256	25.838	26.2652	25.3016	25.8558	25.8384	25.9602			biological regulation;cell division;cellular component organization;cellular process;chromosome organization;organelle organization	cell part;intracellular membrane-bounded organelle;intracellular organelle;nucleoplasm;nucleus;organelle			8	8	8	9.1	9.1	9.1	164.42	0	8.5932	25	39917000	73185000	52646000	38640000	19739000
Q8BRT1	CLIP-associating protein 2	Clasp2	0.0680857	0.718055	-0.150487	0.900946	0.00696516	1	-0.185549	0.879315	0.495965	0.961662	-0.035062	0.97599	31.1626	31.365	31.2926	31.1494	31.4783	31.2811	31.4608	31.4671	31.2773	31.4059	31.4841	31.3902	31.4295	31.4301			biological regulation;cell cycle;cell division;cell motility;cellular component movement;cellular component organization;cellular process;cytoskeleton organization;establishment or maintenance of cell polarity;locomotion;meiotic cell cycle;microtubule organizing center organization;mitosis;nuclear division;organelle fission;organelle organization;regulation of organelle organization	cell cortex;cell part;Golgi apparatus;intracellular membrane-bounded organelle;intracellular non-membrane-bounded organelle;intracellular organelle;kinetochore;macromolecular complex;membrane;microtubule organizing center;organelle;plasma membrane;protein complex		CLASP_N	61	61	55	53.2	53.2	48.7	140.74	0	323.31	640	2512300000	2900500000	2656100000	2433600000	821730000
Q8BTV2	Cleavage and polyadenylation specificity factor subunit 7	Cpsf7	0.0681006	0.258904	-2.97271	0.127387	0.407084	1	-0.930719	0.524597	0.219198	0.503216	2.04199	4.11814	19	19	19	19	23.7642	24.2582	23.8412	19	19	23.6536	19	19	19	19			cellular component assembly;cellular component organization;cellular metabolic process;cellular nitrogen compound metabolic process;cellular process;macromolecular complex assembly;macromolecule metabolic process;metabolic process;mRNA metabolic process;mRNA processing;nitrogen compound metabolic process;nucleobase-containing compound metabolic process;primary metabolic process;protein complex as…	cell part;intracellular membrane-bounded organelle;intracellular organelle;macromolecular complex;membrane;mRNA cleavage factor complex;nucleus;organelle;protein complex	mRNA surveillance pathway	RRM_1	3	3	3	6.2	6.2	6.2	52.01	0.00099602	2.9629	2	0	8912500	0	11576000	5339700
Q99N28	Cell adhesion molecule 3	Cadm3	0.0682239	0.490354	-0.431613	0.741432	0.456203	1	-0.237912	0.847972	0.438253	0.867564	0.193701	1.14369	26.4455	25.7253	26.0636	26.5902	26.6334	26.8979	26.329	26.7081	26.6203	26.56	25.9704	26.3653	26.1055	27.2191			biological adhesion;cell adhesion;cellular process;localization	cell part;membrane;plasma membrane	Cell adhesion molecules (CAMs)	C2-set_2;V-set	5	5	5	19.2	19.2	19.2	42.964	0	10.334	29	99161000	98430000	69727000	114030000	14000000
Q8JZQ2	AFG3-like protein 2	Afg3l2	0.0684804	0.569039	-0.324661	0.798486	0.640565	1	-0.0971807	0.934858	0.160789	0.755284	0.22748	1.17079	28.6772	28.2863	28.7362	29.0131	29.1012	29.1842	28.849	28.8659	29.0139	28.6756	28.3762	28.6902	29.0462	29.0888			anatomical structure development;anatomical structure morphogenesis;biological regulation;cell development;cellular component morphogenesis;cellular component organization;cellular membrane organization;cellular metabolic process;cellular process;death;developmental process;macromolecule metabolic process;membrane fusion;membrane organization;metabolic process;mitochondrion organization;organelle…	cell part;intracellular membrane-bounded organelle;intracellular organelle;membrane;mitochondrion;organelle		AAA;FtsH_ext;Peptidase_M41	30	29	29	34.2	33.2	33.2	89.518	0	111.95	138	571330000	439350000	373190000	688510000	79977000
P62874	Guanine nucleotide-binding protein G(I)/G(S)/G(T) subunit beta-1	Gnb1	0.0687035	0.681211	-0.188575	0.877472	0.457168	1	-0.0978058	0.934453	0.453739	0.913419	0.0907692	1.06494	33.7015	33.4228	33.6523	33.6544	33.862	34.0036	33.6936	33.7229	33.6994	33.5902	33.7013	33.6286	33.5258	34.0819			anatomical structure development;biological regulation;cell death;cell proliferation;cellular homeostasis;cellular ion homeostasis;cellular process;death;detection of stimulus;developmental process;homeostatic process;metabolic process;multicellular organismal process;neurological system process;response to abiotic stimulus;response to chemical stimulus;response to external stimulus;response to s…	cell body;cell part;cell projection;cilium;extracellular organelle;macromolecular complex;membrane;neuron projection;organelle;photoreceptor inner segment;plasma membrane;protein complex;vesicle	Chemokine signaling pathway;Phototransduction;Taste transduction	WD40	21	21	12	71.5	71.5	41.2	37.377	0	323.31	593	14472000000	12898000000	13871000000	15455000000	3374800000
Q07409	Contactin-3	Cntn3	0.0692192	0.273405	-2.86654	0.137115	NaN	1	0	1	0.0411301	0.310077	2.86654	7.29313	19	19	19	19	19	24.2997	23.4596	19	23.5733	19	19	19	19	19			anatomical structure development;biological adhesion;cell adhesion;cellular process;developmental process	cell part;membrane;plasma membrane		fn3;I-set	3	2	2	4	3	3	113.23	0.0046656	2.329	1	0	0	0	0	0
Q9CWZ3;A0A0N4SUH6	RNA-binding protein 8A	Rbm8a	0.0692953	0.585858	0.309996	1.2397	0.230992	1	0.179355	1.13238	0.377099	0.883193	-0.130641	0.913426	27.4547	27.1819	27.0834	27.4679	26.637	26.8782	27.1924	27.1575	27.0698	27.0842	27.2005	27.4227	26.8567	27.024			biological regulation;catabolic process;cellular metabolic process;cellular nitrogen compound metabolic process;cellular process;establishment of localization;macromolecule metabolic process;metabolic process;mRNA metabolic process;mRNA processing;nitrogen compound metabolic process;nucleobase-containing compound metabolic process;nucleobase-containing compound transport;primary metabolic process…	cell part;cytoplasm;macromolecular complex;ribonucleoprotein complex;spliceosomal complex	mRNA surveillance pathway;RNA transport;Spliceosome	RRM_1	5	5	5	42.5	42.5	42.5	19.889	0	42.356	59	201690000	179440000	132260000	223550000	17360000
Q3UHC1	Rap guanine nucleotide exchange factor (GEF) 1	Rapgef1	0.0693028	0.287902	-2.43906	0.184403	NaN	1	0	1	0.0411896	0.335158	2.43906	5.42289	19	19	19	19	23.5148	22.92	22.7605	19	19	19	19	19	19	19			anatomical structure development;biological adhesion;biological regulation;cell adhesion;cell development;cellular process;developmental process;response to chemical stimulus;response to stimulus;signal transduction	cell part;endosome;intracellular membrane-bounded organelle;intracellular organelle;organelle	Focal adhesion;Insulin signaling pathway;Neurotrophin signaling pathway;Renal cell carcinoma	RasGEF;RasGEF_N	2	2	2	1.6	1.6	1.6	136.48	0.0094201	1.8617	2	0	0	0	0	3054800
Q8BM65	Neuronal tyrosine-phosphorylated phosphoinositide-3-kinase adapter 2	Nyap2	0.0693264	0.50417	0.397251	1.317	0.418678	1	1.12688	2.18386	0.544986	0.821486	0.72963	1.65821	24.7601	24.5944	24.3616	25.1379	24.0609	24.0925	24.3988	24.4328	24.5964	24.7252	24.5241	24.6503	19	25.0336			anatomical structure morphogenesis;biological regulation;cellular component morphogenesis;cellular component organization;cellular process;developmental process;response to stimulus;signal transduction				4	4	4	9.7	9.7	9.7	73.896	0.0016103	2.6701	5	39259000	26998000	22406000	23455000	5610700
P97492	Regulator of G-protein signaling 14	Rgs14	0.0693847	0.732227	-0.124735	0.917173	0.494642	1	0.155984	1.11418	0.189328	0.723692	0.280719	1.2148	28.3025	28.3642	28.4298	28.364	28.5275	28.5609	28.5138	28.3036	28.5435	28.7703	28.3389	28.0421	27.6122	28.282			behavior;biological regulation;cell division;cellular component organization;cellular process;chromosome segregation;cytoskeleton organization;establishment of localization;mitosis;multicellular organismal process;neurological system process;nuclear division;nuclear transport;nucleocytoplasmic transport;organelle fission;organelle organization;regulation of protein modification process;response t…	cell part;cell projection;centrosome;cytoplasm;intracellular membrane-bounded organelle;intracellular non-membrane-bounded organelle;intracellular organelle;macromolecular complex;membrane;microtubule organizing center;neuron projection;nucleus;organelle;plasma membrane;protein complex		GoLoco;RBD;RGS	19	19	19	52.1	52.1	52.1	59.846	0	68.107	122	339180000	359970000	345460000	303210000	93251000
Q9JLJ2	4-trimethylaminobutyraldehyde dehydrogenase	Aldh9a1	0.0694184	0.521534	-0.372411	0.77249	0.439256	1	-0.170512	0.888528	0.391298	0.851476	0.201899	1.15021	28.8631	28.9973	28.7998	28.6166	29.5221	29.4182	29.0329	29.2474	28.7375	29.3042	28.62	28.6496	29.4773	28.8976			amine metabolic process;anatomical structure development;biological regulation;biosynthetic process;cellular aldehyde metabolic process;cellular amino acid metabolic process;cellular ketone metabolic process;cellular metabolic process;cellular nitrogen compound metabolic process;cellular process;developmental process;metabolic process;neurotransmitter metabolic process;nitrogen compound metabolic…	cell part;cytosol;extracellular organelle;intracellular membrane-bounded organelle;intracellular organelle;mitochondrion;organelle;vesicle	Arginine and proline metabolism;Ascorbate and aldarate metabolism;beta-Alanine metabolism;Fatty acid metabolism;Glycerolipid metabolism;Glycolysis / Gluconeogenesis;Histidine metabolism;Lysine degradation;Propanoate metabolism;Pyruvate metabolism;Tryptophan metabolism;Valine, leucine and isoleucine degradation	Aldedh	18	18	18	46	46	46	53.514	0	84.845	143	558620000	615210000	501440000	466310000	155490000
Q6NVF0	Inositol polyphosphate 5-phosphatase OCRL	Ocrl	0.0695303	0.666959	0.227133	1.17051	0.168389	1	0.176854	1.13042	0.679797	0.952116	-0.0502785	0.96575	25.5308	25.2396	25.3982	25.2727	25.2716	25.1493	24.8874	25.0404	25.3172	25.1601	25.5063	25.1095	25.165	24.9765			anatomical structure formation involved in morphogenesis;biological regulation;cellular component assembly;cellular component organization;cellular lipid metabolic process;cellular metabolic process;cellular process;developmental process;embryo development;lipid metabolic process;metabolic process;phosphorus metabolic process;primary metabolic process;response to stimulus;signal transduction	cell part;cell projection;cilium;cytoplasm;cytoplasmic membrane-bounded vesicle;endosome;extracellular organelle;Golgi apparatus;intracellular membrane-bounded organelle;intracellular organelle;membrane;nucleus;organelle;plasma membrane;vesicle	Inositol phosphate metabolism;Phosphatidylinositol signaling system	Exo_endo_phos;RhoGAP	5	5	5	8.8	8.8	8.8	104.28	0	6.7671	9	55207000	41044000	52439000	28000000	7716900
Q9D051	Pyruvate dehydrogenase E1 component subunit beta, mitochondrial	Pdhb	0.0698652	0.694905	-0.176967	0.884561	0.539386	1	-0.0865881	0.941747	0.519673	0.922325	0.0903786	1.06465	33.2077	33.3258	33.3572	33.2635	33.7025	33.4421	33.373	33.5066	33.3032	33.5416	33.3124	33.1697	33.7325	33.1193			alcohol metabolic process;biosynthetic process;carbohydrate metabolic process;catabolic process;cellular ketone metabolic process;cellular metabolic process;cellular process;cofactor metabolic process;metabolic process;organic acid metabolic process;primary metabolic process;small molecule metabolic process	cell part;extracellular organelle;intracellular membrane-bounded organelle;intracellular organelle;macromolecular complex;mitochondrion;nucleoplasm;nucleus;organelle;protein complex;pyruvate dehydrogenase complex;vesicle	Butanoate metabolism;Citrate cycle (TCA cycle);Glycolysis / Gluconeogenesis;Pyruvate metabolism;Valine, leucine and isoleucine biosynthesis	Transket_pyr;Transketolase_C	20	20	20	69.1	69.1	69.1	38.937	0	323.31	584	9338500000	10361000000	9802500000	8900100000	4506600000
Q5RJI5	Serine/threonine-protein kinase BRSK1	Brsk1	0.0700049	0.701301	-0.163338	0.892957	0.00740494	1	-0.175938	0.885192	0.865261	0.985636	-0.0126003	0.991304	29.6711	29.7515	29.7356	29.6196	30.0823	29.7625	29.8074	29.904	29.7327	29.932	29.9212	29.9144	29.831	29.7532			anatomical structure morphogenesis;biological regulation;cell cycle;cell differentiation;cellular component morphogenesis;cellular component organization;cellular metabolic process;cellular process;developmental process;establishment of localization;establishment or maintenance of cell polarity;macromolecule metabolic process;macromolecule modification;metabolic process;microtubule organizing cen…	cell part;centrosome;cytoplasm;cytoplasmic membrane-bounded vesicle;intracellular membrane-bounded organelle;intracellular non-membrane-bounded organelle;intracellular organelle;microtubule organizing center;nucleoplasm;nucleus;organelle;vesicle		Pkinase	26	26	23	41.4	41.4	38.2	85.154	0	300.96	329	985980000	1053400000	875790000	872120000	206870000
P32883	GTPase KRas	Kras	0.0702007	0.678852	-0.191126	0.875922	0.137444	1	-0.159976	0.89504	0.764544	0.970096	0.0311501	1.02183	29.0365	29.2831	29.1551	29.2056	29.3191	29.5034	29.5138	29.3226	29.1471	29.2544	29.4378	29.4072	29.0752	29.4757			anatomical structure morphogenesis;behavior;biological regulation;cell communication;cell differentiation;cell-cell signaling;cellular component organization;cellular process;cytoskeleton organization;developmental process;homeostatic process;metabolic process;multicellular organismal process;neurological system process;organelle organization;regulation of protein modification process;response to…	cell part;cytoplasm;membrane;plasma membrane	Acute myeloid leukemia;Aldosterone-regulated sodium reabsorption;Axon guidance;B cell receptor signaling pathway;Bladder cancer;Chemokine signaling pathway;Chronic myeloid leukemia;Colorectal cancer;Dorso-ventral axis formation;Endometrial cancer;ErbB signaling pathway;Fc epsilon RI signaling pathway;Gap junction;Glioma;GnRH signaling pathway;Hepatitis C;Insulin signaling pathway;Long-term depres…	Ras	8	8	4	53.4	53.4	19.6	21.656	0	102.75	101	530350000	636700000	602390000	531650000	181290000
Q921G7	Electron transfer flavoprotein-ubiquinone oxidoreductase, mitochondrial	Etfdh	0.0704065	0.258704	3.26715	9.6274	0.22564	1	0.0753384	1.05361	0.0456948	0.326963	-3.19181	0.109438	24.4786	24.4892	24.3092	24.6115	19	19	19	24.4977	24.5273	24.3826	24.438	24.4154	24.3888	24.3592			catabolic process;cellular ketone metabolic process;cellular lipid metabolic process;cellular metabolic process;cellular process;generation of precursor metabolites and energy;lipid metabolic process;metabolic process;organic acid metabolic process;primary metabolic process;response to chemical stimulus;response to oxidative stress;response to stimulus;response to stress;small molecule metabolic …	cell part;electron transfer flavoprotein complex;intracellular membrane-bounded organelle;intracellular organelle;macromolecular complex;membrane;mitochondrion;organelle;protein complex		ETF_QO	4	4	4	8.3	8.3	8.3	68.09	0.00071454	3.8715	5	14248000	14771000	13389000	25983000	0
Q9D0I9	Arginine--tRNA ligase, cytoplasmic	Rars1	0.0708193	0.508653	-0.386094	0.765199	0.774174	1	-0.0520053	0.964595	0.143953	0.674097	0.334089	1.26058	27.3811	27.6581	27.5616	27.3425	28.2343	28.0677	27.9752	27.6926	27.3899	27.7015	27.4164	27.2888	28.0162	27.2664			amine metabolic process;cellular amino acid metabolic process;cellular ketone metabolic process;cellular metabolic process;cellular nitrogen compound metabolic process;cellular process;macromolecule metabolic process;metabolic process;nitrogen compound metabolic process;nucleobase-containing compound metabolic process;organic acid metabolic process;primary metabolic process;RNA metabolic process;…	cell part;cytoplasm;extracellular organelle;intracellular membrane-bounded organelle;intracellular organelle;macromolecular complex;membrane;mitochondrion;nucleoplasm;organelle;protein complex;vesicle	Aminoacyl-tRNA biosynthesis	Arg_tRNA_synt_N;DALR_1;tRNA-synt_1d	16	16	16	31.7	31.7	31.7	75.673	0	39.003	91	160940000	216830000	190360000	128770000	78807000
Q3TC33	Coiled-coil domain-containing protein 127	Ccdc127	0.0708223	0.490317	0.42514	1.3427	0.534266	1	0.166363	1.12223	0.32777	0.799497	-0.258778	0.835796	27.3853	27.0293	27.5586	27.588	26.7124	26.5303	27.1345	27.166	27.2826	26.8677	27.1943	27.611	26.7073	27.7393							10	10	10	38.1	38.1	38.1	30.509	0	20.381	22	201310000	176270000	207240000	213770000	23610000
Q9QWI6	SRC kinase signaling inhibitor 1	Srcin1	0.0709267	0.680295	0.201235	1.14968	0.519863	1	-0.0926683	0.937787	0.0680627	0.649574	-0.293903	0.815692	33.4465	33.5096	33.378	33.3177	33.0334	33.0388	33.3288	33.2403	33.4171	33.2962	33.5814	33.8069	33.1811	33.6625			anatomical structure morphogenesis;biological adhesion;biological regulation;cell adhesion;cell morphogenesis;cellular component morphogenesis;cellular component organization;cellular process;developmental process;establishment of localization;exocytosis;regulation of protein modification process;secretion;transport;vesicle-mediated transport	cell part;cell projection;cytoplasm;cytoskeleton;intracellular non-membrane-bounded organelle;intracellular organelle;membrane;neuron projection;organelle;synapse			94	94	94	69.1	69.1	69.1	134.86	0	323.31	1819	12822000000	12625000000	10868000000	11538000000	2097300000
P62869	Elongin-B	Elob	0.0713153	0.258722	3.33948	10.1224	0.0743008	0.356929	3.32255	10.0043	0.993339	1	-0.016927	0.988336	24.8464	24.6264	24.6191	24.3065	24.6589	19	24.6416	19	19	19	19	24.5332	19	24.852			biological regulation;biosynthetic process;cellular metabolic process;cellular nitrogen compound metabolic process;cellular process;macromolecule metabolic process;macromolecule modification;metabolic process;nitrogen compound metabolic process;nucleobase-containing compound metabolic process;primary metabolic process;protein metabolic process;protein modification by small protein conjugation or …	cell part;extracellular organelle;macromolecular complex;organelle;protein complex;transcription elongation factor complex;ubiquitin ligase complex;vesicle	Pathways in cancer;Renal cell carcinoma;Ubiquitin mediated proteolysis	ubiquitin	4	4	4	42.4	42.4	42.4	13.17	0.0010077	3.1171	5	40942000	41180000	21082000	9913200	8321200
Q02053	Ubiquitin-like modifier-activating enzyme 1	Uba1	0.071423	0.596991	-0.283428	0.821636	0.371329	1	-0.196461	0.872689	0.692679	0.930223	0.0869678	1.06214	32.0839	32.1336	32.2633	32.1413	32.6968	32.6381	32.0973	32.5046	32.258	32.56	32.0897	31.941	32.9392	32.2301			catabolic process;cellular metabolic process;cellular process;macromolecule metabolic process;metabolic process;primary metabolic process;protein metabolic process;proteolysis;proteolysis involved in cellular protein catabolic process;response to DNA damage stimulus;response to stimulus;response to stress	cell part;cytoplasm;cytosol;extracellular organelle;intracellular membrane-bounded organelle;intracellular organelle;membrane;mitochondrion;nucleus;organelle;vesicle	Parkinson's disease;Ubiquitin mediated proteolysis	ThiF;UBA_e1_C;UBA_e1_thiolCys;UBACT	47	47	47	55.1	55.1	55.1	117.81	0	323.31	795	4972200000	5154300000	5267300000	4599700000	1802000000
P97742	Carnitine O-palmitoyltransferase 1, liver isoform	Cpt1a	0.0715486	0.465472	0.512166	1.42619	0.558468	1	0.215523	1.16112	0.420829	0.820937	-0.296643	0.814145	24.5569	24.9128	25.1277	24.6938	24.363	23.9108	23.9299	24.405	24.9444	24.7052	24.7038	24.5034	25.4819	23.642			alcohol metabolic process;amine metabolic process;behavior;biological regulation;carbohydrate metabolic process;catabolic process;cell differentiation;cellular amino acid metabolic process;cellular component assembly;cellular component organization;cellular ketone metabolic process;cellular lipid metabolic process;cellular metabolic process;cellular nitrogen compound metabolic process;cellular pr…	cell part;intracellular membrane-bounded organelle;intracellular organelle;membrane;mitochondrion;organelle	Adipocytokine signaling pathway;Fatty acid metabolism;PPAR signaling pathway	Carn_acyltransf	4	4	4	6.7	6.7	6.7	88.25	0	10.101	19	18737000	24235000	26161000	25917000	11191000
Q5U4C1	G-protein coupled receptor-associated sorting protein 1	Gprasp1	0.0718887	0.41828	0.857905	1.8124	0.718476	1	-0.0817721	0.944896	0.0383737	0.40225	-0.939677	0.52135	29.2588	28.9644	28.9686	28.6214	26.7416	28.2662	28.4158	28.4536	28.5999	28.429	29.4005	29.1001	29.0402	29.2057			cellular process;endosome transport;establishment of localization;transport;vacuolar transport;vesicle-mediated transport	cell part;cytoplasm		Arm_2	8	8	8	9.1	9.1	9.1	151.74	0	15.996	35	590960000	609010000	547800000	110280000	80466000
Q8BH55	Threonine synthase-like 1	Thnsl1	0.0719227	0.240677	4.41761	21.3714	0.494938	1	1.26519	2.40359	0.225598	0.494877	-3.15242	0.112468	26.8086	26.2198	26.3091	26.3267	19	26.606	19	19	26.3862	19	26.3977	26.6963	27.29	26.3702			amine metabolic process;biosynthetic process;cellular amino acid metabolic process;cellular ketone metabolic process;cellular metabolic process;cellular nitrogen compound metabolic process;cellular process;metabolic process;nitrogen compound metabolic process;organic acid metabolic process;primary metabolic process;small molecule metabolic process	cell part;cytoplasm;intracellular membrane-bounded organelle;intracellular organelle;mitochondrion;nucleoplasm;nucleus;organelle		PALP;SKI;Thr_synth_N	3	3	3	3.5	3.5	3.5	83.099	0.0010084	3.1203	4	142720000	129370000	6010700	108590000	2258700
P63321	Ras-related protein Ral-A	Rala	0.0720557	0.586905	-0.302654	0.81076	0.133115	1	-0.182285	0.881306	0.294447	0.877628	0.120369	1.08701	28.4407	28.0735	28.1668	28.5111	28.7446	28.7952	28.247	28.5877	28.6288	28.4504	28.5828	28.4882	28.3157	28.5645			anatomical structure formation involved in morphogenesis;biological regulation;cell communication;cell death;cellular component organization;cellular localization;cellular process;cytokinesis;cytoskeleton organization;death;developmental process;establishment of localization;exocytosis;localization;metabolic process;organelle organization;regulation of organelle organization;regulation of protein…	cell part;cell surface;cytoplasmic membrane-bounded vesicle;extracellular organelle;intracellular membrane-bounded organelle;intracellular organelle;macromolecular complex;membrane;midbody;organelle;plasma membrane;protein complex;vacuole;vesicle	Pancreatic cancer;Pathways in cancer	Ras	9	9	9	37.9	37.9	37.9	23.553	0	44.824	119	341480000	247960000	243100000	601560000	97075000
Q5SVR0	TBC1 domain family member 9B	Tbc1d9b	0.0725454	0.455359	0.55978	1.47404	0.448599	1	-0.471957	0.720986	0.0793759	0.413783	-1.03174	0.489121	24.8001	24.8049	24.0429	24.0149	24.0149	23.4273	23.7315	24.3624	23.7437	24.5597	24.1497	23.7473	25.547	26.4346				cell part		GRAM;RabGAP-TBC	3	3	3	3.8	3.8	3.8	141.78	0	10.767	4	17070000	18241000	29501000	30165000	6077300
Q61550	Double-strand-break repair protein rad21 homolog	Rad21	0.0727455	0.271688	3.07694	8.43822	0.793273	1	0.0501058	1.03534	0.0475732	0.332828	-3.02683	0.122697	24.1409	24.285	24.0289	24.1976	19	19	24.6579	19	23.7729	24.429	23.9834	24.2545	23.5606	24.3376			biological regulation;cell death;cell division;cellular component organization;cellular localization;cellular metabolic process;cellular nitrogen compound metabolic process;cellular process;chromosome segregation;death;DNA metabolic process;DNA repair;localization;macromolecule metabolic process;metabolic process;mitosis;nitrogen compound metabolic process;nuclear division;nucleobase-containing c…	cell part;chromosome;cohesin complex;intracellular non-membrane-bounded organelle;intracellular organelle;macromolecular complex;membrane;nuclear chromosome;nucleoplasm;organelle;protein complex	Cell cycle;Cell cycle - yeast	Rad21_Rec8;Rad21_Rec8_N	3	3	3	7.4	7.4	7.4	72.082	0	5.1089	9	17050000	28482000	16267000	16381000	0
Q80WG5	Volume-regulated anion channel subunit LRRC8A	Lrrc8a	0.0727771	0.471955	-0.606837	0.656635	0.884103	1	-0.0347719	0.976186	0.0177084	0.416214	0.572065	1.48665	24.5339	23.3901	24.1765	24.0103	25.2588	24.548	24.7225	24.3037	24.3397	24.0523	24.0305	23.8103	24.3315	24.0878			biological regulation;cell activation;cell differentiation;cellular homeostasis;cellular process;developmental process;establishment of localization;homeostatic process;immune system process;ion transport;response to abiotic stimulus;response to osmotic stress;response to stimulus;response to stress;transport	cell part;macromolecular complex;membrane;plasma membrane;protein complex		DUF3733;LRR_4;LRR_8	2	2	2	3.3	3.3	3.3	94.118	0.0055436	2.2454	5	36262000	10087000	16179000	20627000	9920300
Q8C079	Striatin-interacting protein 1	Strip1	0.0728368	0.535902	-0.351724	0.783647	0.41963	1	0.151023	1.11036	0.0135919	0.445531	0.502748	1.41691	24.5669	24.832	25.1972	24.8071	24.9918	25.2713	25.5544	24.966	25.2291	25.0524	24.5438	24.416	24.5904	24.8963			biological regulation;cell motility;cellular component movement;cellular component organization;cellular process;cytoskeleton organization;locomotion;organelle organization	cell part;cytoplasm;extracellular organelle;intracellular membrane-bounded organelle;intracellular organelle;nucleus;organelle;vesicle		DUF3402;N1221	3	3	3	4.1	4.1	4.1	95.584	0.00036617	4.2153	3	22881000	34298000	32688000	25744000	12595000
Q9D1G1	Ras-related protein Rab-1B	Rab1b	0.0728938	0.444049	-0.674719	0.626454	0.274356	1	-0.19918	0.871045	0.128473	0.565106	0.475539	1.39044	27.9109	27.2511	27.5862	27.7031	28.9361	28.2487	28.7929	27.9094	27.5507	27.6697	27.5735	28.0851	27.7036	28.0282			autophagy;biological regulation;catabolic process;cellular component assembly;cellular component organization;cellular metabolic process;cellular process;establishment of localization;Golgi vesicle transport;metabolic process;protein transport;regulation of organelle organization;response to stimulus;signal transduction;transport;vesicle-mediated transport	cell part;extracellular organelle;Golgi apparatus;intracellular membrane-bounded organelle;intracellular organelle;membrane;mitochondrion;organelle;vesicle		Ras	11	4	4	59.2	28.9	28.9	22.187	0	76.356	33	282690000	52921000	230620000	313840000	148410000
Q99PV0	Pre-mRNA-processing-splicing factor 8	Prpf8	0.0728963	0.680368	-0.212083	0.86329	0.512004	1	-0.037601	0.974274	0.11081	0.789804	0.174482	1.12856	28.432	28.498	28.3804	28.4363	28.7108	28.4006	28.861	28.7762	28.4951	28.4837	28.4563	28.5975	28.3248	28.509			cellular component assembly;cellular component organization;cellular macromolecular complex assembly;cellular metabolic process;cellular nitrogen compound metabolic process;cellular process;macromolecular complex assembly;macromolecule metabolic process;metabolic process;mRNA metabolic process;mRNA processing;nitrogen compound metabolic process;nucleobase-containing compound metabolic process;pri…	cell part;intracellular membrane-bounded organelle;intracellular organelle;macromolecular complex;membrane;nucleus;organelle;ribonucleoprotein complex;small nuclear ribonucleoprotein complex;spliceosomal complex	Spliceosome	JAB;PRO8NT;PROCN;PROCT;PRP8_domainIV;RRM_4;U5_2-snRNA_bdg;U6-snRNA_bdg	38	38	38	19.3	19.3	19.3	273.61	0	59.556	152	352690000	370550000	261760000	444890000	103010000
Q8BIK4	Dedicator of cytokinesis protein 9	Dock9	0.0729118	0.585228	0.308295	1.23824	0.00333197	0.374645	0.626413	1.54372	0.107798	0.66484	0.318118	1.2467	26.2367	26.1992	26.3808	26.2711	26.2873	26.0295	25.8151	25.5658	26.1205	26.0323	25.5643	25.31	25.7913	25.5299			biological regulation;cellular process;response to stimulus;signal transduction	cell part;endomembrane system;membrane		Ded_cyto;DOCK-C2;DUF3398;PH	8	8	7	5.4	5.4	5	235.31	0	13.528	21	101160000	83485000	65982000	92220000	20101000
Q9CPQ8	ATP synthase subunit g, mitochondrial	Atp5mg	0.0731656	0.625888	-0.263131	0.833277	0.488555	1	-0.123293	0.91809	0.441954	0.885744	0.139838	1.10178	30.5191	30.7466	30.7738	30.7588	31.219	31.1873	30.7469	30.8533	30.8071	31.0882	30.5667	30.6059	31.2383	30.6153			biosynthetic process;cellular metabolic process;cellular nitrogen compound metabolic process;cellular process;establishment of localization;heterocycle metabolic process;hydrogen transport;ion transport;metabolic process;nitrogen compound metabolic process;nucleobase-containing compound metabolic process;nucleobase-containing small molecule metabolic process;nucleotide metabolic process;primary m…	cell part;macromolecular complex;protein complex;proton-transporting two-sector ATPase complex	Oxidative phosphorylation	ATP-synt_G	9	9	9	61.2	61.2	61.2	11.424	0	73.236	278	1703500000	1969500000	1980400000	2079600000	695570000
Q6P1B1	Xaa-Pro aminopeptidase 1	Xpnpep1	0.0732814	0.699838	-0.166717	0.890868	0.232184	1	-0.192575	0.875043	0.847415	0.975515	-0.0258583	0.982236	29.0245	29.2295	29.1976	28.9726	29.1792	29.2698	29.1533	29.4199	29.3417	29.5201	29.1501	29.0974	29.6537	29.0719			biological regulation;biosynthetic process;catabolic process;cellular metabolic process;cellular nitrogen compound metabolic process;cellular process;macromolecule metabolic process;metabolic process;nitrogen compound metabolic process;nucleobase-containing compound metabolic process;peptide metabolic process;primary metabolic process;protein metabolic process;proteolysis;regulation of transport;…	cell part;cytoplasm;cytosol;extracellular organelle;macromolecular complex;organelle;protein complex;transcription elongation factor complex;vesicle		Creatinase_N;Peptidase_M24	23	23	23	49.3	49.3	49.3	69.59	0	86.284	163	646740000	713500000	707800000	415140000	163070000
Q91WC3	Long-chain-fatty-acid--CoA ligase 6	Acsl6	0.0734538	0.679347	-0.194767	0.873714	0.413158	1	-0.249615	0.841121	0.839207	0.96724	-0.0548473	0.962696	29.8163	29.8875	29.915	29.7217	30.1539	30.0584	29.8832	30.2184	29.8356	30.0746	29.8019	29.8747	31.046	29.6265			anatomical structure development;biological regulation;biosynthetic process;cell development;cell proliferation;cellular ketone metabolic process;cellular lipid metabolic process;cellular metabolic process;cellular process;developmental process;establishment of localization;glycerol ether metabolic process;lipid metabolic process;lipid transport;metabolic process;organic acid metabolic process;or…	cell part;intracellular membrane-bounded organelle;intracellular organelle;membrane;microbody;mitochondrion;nucleus;organelle	Adipocytokine signaling pathway;Fatty acid metabolism;Peroxisome;PPAR signaling pathway	AMP-binding	36	36	36	52.9	52.9	52.9	78.016	0	252.62	308	867080000	1038000000	899510000	842410000	325250000
P46735	Unconventional myosin-Ib	Myo1b	0.073739	0.477722	-0.488641	0.712696	0.158927	0.963817	-0.4225	0.746131	0.7643	0.951398	0.0661407	1.04691	24.7418	24.9304	24.0505	24.9313	25.0309	25.2427	25.462	25.294	24.731	24.8433	24.7134	24.9574	25.6833	25.2325			cellular component assembly;cellular component movement;cellular component organization;cellular localization;cellular process;cytoskeleton organization;establishment of localization;Golgi vesicle transport;localization;metabolic process;multicellular organismal process;neurological system process;organelle localization;organelle organization;transport;vesicle-mediated transport	brush border;cell part;cell projection;cytoplasm;cytoskeleton;endosome;extracellular organelle;filopodium;intracellular membrane-bounded organelle;intracellular non-membrane-bounded organelle;intracellular organelle;macromolecular complex;membrane;microvillus;organelle;plasma membrane;protein complex;vesicle		IQ;Myosin_head;Myosin_TH1	9	9	9	10.4	10.4	10.4	128.56	0	9.2337	14	36735000	22333000	17252000	31031000	7168900
Q03137	Ephrin type-A receptor 4	Epha4	0.0738451	0.637937	-0.248377	0.841843	0.745187	1	0.0807127	1.05754	0.158464	0.683855	0.32909	1.25622	29.0556	28.7561	29.1517	28.8278	29.2097	29.3168	29.2143	29.3282	28.912	29.4641	28.8909	28.5625	28.3332	29.0847			anatomical structure morphogenesis;behavior;biological adhesion;biological regulation;cell adhesion;cell motility;cell recognition;cellular component morphogenesis;cellular component movement;cellular component organization;cellular metabolic process;cellular process;developmental process;locomotion;macromolecule metabolic process;macromolecule modification;metabolic process;multicellular organis…	cell part;cell projection;cell surface;cytoplasm;endoplasmic reticulum;filopodium;Golgi apparatus;intracellular membrane-bounded organelle;intracellular organelle;membrane;neuron projection;organelle;plasma membrane;site of polarized growth;synapse	Axon guidance	EphA2_TM;Ephrin_lbd;fn3;Pkinase_Tyr;SAM_2	21	21	17	27.3	27.3	23.1	109.81	0	52.653	117	798710000	646540000	611200000	678060000	118940000
Q8R1Q8	Cytoplasmic dynein 1 light intermediate chain 1	Dync1li1	0.0738766	0.670431	-0.225524	0.855284	0.707405	1	-0.0625289	0.957584	0.297535	0.851616	0.162995	1.11961	28.9901	29.1613	29.1868	28.8501	29.289	29.4867	29.2612	29.2946	29.0315	29.3712	28.9062	28.9586	29.4612	28.8508			biological regulation;cell division;cellular component movement;cellular component organization;cellular process;establishment of localization;metabolic process;mitosis;nuclear division;organelle fission;organelle organization;regulation of cell cycle;regulation of mitotic cell cycle;transport	cell part;centrosome;cytoplasm;intracellular non-membrane-bounded organelle;intracellular organelle;kinetochore;macromolecular complex;membrane;microtubule organizing center;organelle;plasma membrane;protein complex	Phagosome;Vasopressin-regulated water reabsorption	DLIC	23	23	22	58.9	58.9	56.4	56.614	0	108.87	192	580110000	553380000	816530000	504610000	123980000
O35382	Exocyst complex component 4	Exoc4	0.0738998	0.634547	-0.251818	0.839837	0.616711	1	-0.0874415	0.94119	0.32969	0.855553	0.164377	1.12068	28.099	28.2207	28.3169	27.9437	28.5731	28.4458	28.3841	28.5024	28.079	28.4367	27.9759	27.9184	28.6189	28.2127			cellular process;establishment of localization;membrane docking;protein transport;transport	cell part;cytoplasm;macromolecular complex;membrane;plasma membrane;protein complex	Tight junction	Sec8_exocyst	22	22	22	27.7	27.7	27.7	110.54	0	47.879	140	306850000	377690000	323980000	294920000	79189000
P61264	Syntaxin-1B	Stx1b	0.0741578	0.486259	-0.452011	0.731023	0.102809	0.898952	-0.396981	0.759446	0.76561	0.958561	0.0550293	1.03888	30.7458	29.9662	30.4685	30.7182	31.0123	31.1893	30.4332	31.019	30.9797	30.7875	30.8471	31.0038	30.4858	31.2341			biological regulation;cell differentiation;cellular component assembly;cellular component organization;cellular homeostasis;cellular ion homeostasis;cellular membrane organization;cellular process;developmental process;establishment of localization;exocytosis;homeostatic process;macromolecular complex assembly;membrane docking;membrane fusion;membrane organization;organelle fusion;organelle organ…	cell part;cell projection;cell surface;cytoplasmic membrane-bounded vesicle;endomembrane system;extracellular organelle;extracellular space;intracellular membrane-bounded organelle;intracellular organelle;macromolecular complex;membrane;organelle;plasma membrane;protein complex;vesicle	SNARE interactions in vesicular transport	SNARE;Syntaxin	17	17	15	47.9	47.9	42.7	33.244	0	239.94	309	1911400000	846650000	1417700000	1990600000	520870000
P04919	Band 3 anion transport protein	Slc4a1	0.0744629	0.299859	-2.58825	0.166287	0.0143475	0.321455	-2.87822	0.13601	0.834441	0.94176	-0.289965	0.817922	19	19	19	19	19	22.8709	19	22.7843	24.286	19	21.6638	22.3576	23.5956	22.7741			biological regulation;cellular homeostasis;cellular ion homeostasis;cellular process;establishment of localization;homeostatic process;ion transport;transport	cell part;cytoskeleton;extracellular organelle;intracellular non-membrane-bounded organelle;intracellular organelle;membrane;organelle;vesicle	Collecting duct acid secretion	Band_3_cyto;HCO3_cotransp	2	2	2	2.5	2.5	2.5	103.13	0.00072516	4.0796	4	0	0	0	0	0
Q8VE97	Serine/arginine-rich splicing factor 4	Srsf4	0.0745708	0.619628	0.26965	1.20552	0.432257	1	0.179096	1.13217	0.688486	0.931426	-0.0905537	0.939162	29.6691	29.5712	29.587	29.7162	29.5724	29.6737	29.0979	29.2924	29.1947	29.1538	29.5708	29.6589	28.9216	29.9788			biological regulation;cell differentiation;cellular metabolic process;cellular nitrogen compound metabolic process;cellular process;developmental process;macromolecule metabolic process;metabolic process;mRNA metabolic process;mRNA processing;nitrogen compound metabolic process;nucleobase-containing compound metabolic process;primary metabolic process;RNA metabolic process;RNA processing;RNA spli…	cell part;nucleoplasm		RRM_1	12	12	9	22.7	22.7	17	55.979	0	55.138	116	1117800000	826870000	791010000	1033500000	144050000
Q71M36	Chondroitin sulfate proteoglycan 5	Cspg5	0.0748096	0.465167	-0.601974	0.658852	0.603775	1	-0.148409	0.902245	0.12756	0.575856	0.453565	1.36942	24.8133	24.5591	25.4491	25.2917	25.8856	26.1093	24.9437	25.5405	25.6723	25.5927	24.8063	24.9021	25.6348	24.9478			anatomical structure morphogenesis;biological regulation;cellular component morphogenesis;cellular component organization;cellular process;developmental process;response to stimulus;response to stress	cell part;Golgi apparatus;intracellular membrane-bounded organelle;intracellular organelle;membrane;organelle;plasma membrane		Chon_Sulph_att;Neural_ProG_Cyt	3	3	3	6.9	6.9	6.9	60.405	0	16.416	13	43237000	33579000	43416000	48563000	10653000
Q68FL6	Methionine--tRNA ligase, cytoplasmic	Mars1	0.0749616	0.584917	-0.314256	0.804266	0.108718	1	-0.235576	0.849346	0.660181	0.930912	0.07868	1.05605	27.316	27.3952	27.3476	27.2857	27.9662	27.7695	27.7267	27.6122	27.1772	27.888	27.3336	27.3005	27.677	27.6594			amine metabolic process;biosynthetic process;cellular amino acid metabolic process;cellular ketone metabolic process;cellular metabolic process;cellular nitrogen compound metabolic process;cellular process;macromolecule metabolic process;metabolic process;nitrogen compound metabolic process;nucleobase-containing compound metabolic process;organic acid metabolic process;primary metabolic process;R…	cell part;cytoplasm;cytosol;extracellular organelle;intracellular membrane-bounded organelle;intracellular non-membrane-bounded organelle;intracellular organelle;membrane;mitochondrion;nucleolus;organelle;vesicle	Aminoacyl-tRNA biosynthesis;Selenocompound metabolism	tRNA-synt_1g;WHEP-TRS	15	15	15	20.7	20.7	20.7	101.43	0	29.455	62	174160000	143640000	208790000	161380000	57512000
Q9QUM9	Proteasome subunit alpha type-6	Psma6	0.0750052	0.678997	-0.218155	0.859664	0.124493	1	0.190049	1.1408	0.00927937	0.469392	0.408204	1.32703	24.8103	25.0516	24.9996	24.9151	25.1231	24.9747	25.4712	25.1032	25.1396	24.6861	25.0024	24.5811	24.9162	24.5848			anatomical structure development;biological regulation;catabolic process;cellular metabolic process;cellular process;developmental process;macromolecule metabolic process;metabolic process;primary metabolic process;protein metabolic process;proteolysis;proteolysis involved in cellular protein catabolic process	cell part;cytoplasm;cytosol;extracellular organelle;intracellular membrane-bounded organelle;intracellular non-membrane-bounded organelle;intracellular organelle;macromolecular complex;nucleoplasm;nucleus;organelle;polysome;proteasome complex;protein complex;ribonucleoprotein complex;vesicle	Proteasome	Proteasome;Proteasome_A_N	4	4	4	20.7	20.7	20.7	27.372	0	7.7062	14	40350000	30978000	12474000	28680000	11078000
P35282	Ras-related protein Rab-21	Rab21	0.075119	0.472227	-0.509342	0.702543	0.564166	1	0.150014	1.10958	0.0437937	0.447571	0.659356	1.57938	26.4154	26.0377	26.5904	26.1829	27.2908	27.1249	26.7929	26.6946	26.1765	26.5464	26.109	25.4271	26.2648	26.4357			biological regulation;cellular process;establishment of localization;metabolic process;protein transport;regulation of transport;response to stimulus;signal transduction;transport	cell part;cell projection;endosome;extracellular organelle;intracellular membrane-bounded organelle;intracellular organelle;membrane;neuron projection;organelle;vesicle		Ras	6	6	6	33.3	33.3	33.3	24.106	0	24.54	26	89920000	99661000	66033000	78664000	43796000
Q3TRR0	Microtubule-associated protein 9	Map9	0.0751361	0.598844	0.291495	1.22391	0.00581579	0.57712	0.495631	1.40994	0.134743	0.764965	0.204136	1.152	26.2211	25.9956	26.4795	26.1249	26.1125	25.5985	25.911	26.0982	25.8486	25.5675	25.7687	25.8112	25.4886	25.9123			biological regulation;cellular component assembly;cellular component organization;cellular process;cytokinesis;cytoskeleton organization;organelle assembly;organelle organization;regulation of cell cycle;regulation of mitotic cell cycle;regulation of organelle organization	cell part;cytoplasm;cytoskeleton;intracellular non-membrane-bounded organelle;intracellular organelle;macromolecular complex;organelle;protein complex			7	7	7	13.5	13.5	13.5	73.51	0	11.266	16	39073000	39681000	130150000	86743000	19335000
P32067	Lupus La protein homolog	Ssb	0.0752442	0.464437	0.60106	1.51683	0.580963	1	0.121001	1.08749	0.161493	0.593043	-0.480059	0.716948	28.4684	28.5139	28.3837	28.3536	27.1944	27.4575	28.2793	27.673	28.5399	27.7588	28.2019	28.3562	28.3295	28.898			cellular metabolic process;cellular nitrogen compound metabolic process;cellular process;macromolecule metabolic process;metabolic process;nitrogen compound metabolic process;nucleobase-containing compound metabolic process;primary metabolic process;RNA metabolic process;RNA processing	cell part;intracellular membrane-bounded organelle;intracellular organelle;macromolecular complex;nucleus;organelle;ribonucleoprotein complex	Systemic lupus erythematosus	La;RRM_1;RRM_3	14	14	14	32.8	32.8	32.8	47.756	0	121.42	68	353620000	411120000	324130000	354710000	62715000
Q8BPN8	DmX-like protein 2	Dmxl2	0.0756914	0.692286	-0.180538	0.882374	0.735615	1	-0.0544045	0.962992	0.372519	0.882645	0.126133	1.09136	31.2989	31.5488	31.5394	31.2749	31.7263	31.6666	31.6244	31.507	31.456	31.8226	31.3822	31.1904	31.6962	31.2581				cell part;cytoplasmic membrane-bounded vesicle;extracellular space;intracellular membrane-bounded organelle;intracellular organelle;membrane;organelle;vesicle		Rav1p_C;WD40	92	92	92	39.4	39.4	39.4	338.2	0	323.31	665	2551800000	3225200000	3055000000	2715000000	840570000
Q8BRJ3	RELT-like protein 2	Rell2	0.0757446	0.432711	0.748199	1.67969	0.0481484	0.770424	0.424379	1.34199	0.37193	0.781984	-0.32382	0.798952	25.7389	25.6729	25.461	25.8381	24.1476	24.8193	24.4193	25.4527	25.8086	24.7964	25.0441	25.5187	25.5268	25.3805			biological regulation	cell part;extracellular matrix;membrane;plasma membrane;proteinaceous extracellular matrix		RELT	2	2	2	7.6	7.6	7.6	32.326	0.0040663	2.3573	11	55354000	57437000	52454000	58655000	2539500
P04627	Serine/threonine-protein kinase A-Raf	Araf	0.0758722	0.682025	-0.20465	0.867749	0.859308	1	-0.0261643	0.982028	0.186291	0.810843	0.178486	1.1317	27.667	27.9148	28.0483	27.7928	28.1401	28.2523	27.95	28.0094	27.9499	28.0576	27.7586	27.9484	28.12	27.5248			biological regulation;regulation of protein modification process	cell part;intracellular membrane-bounded organelle;intracellular organelle;mitochondrion;organelle	Acute myeloid leukemia;Bladder cancer;Chronic myeloid leukemia;Colorectal cancer;Endometrial cancer;ErbB signaling pathway;Glioma;Hepatitis C;Insulin signaling pathway;Long-term depression;Long-term potentiation;Melanoma;Natural killer cell mediated cytotoxicity;Non-small cell lung cancer;Pancreatic cancer;Pathways in cancer;Progesterone-mediated oocyte maturation;Prostate cancer;Regulation of ac…	C1_1;Pkinase_Tyr;RBD	10	10	7	15.9	15.9	10.8	67.581	0	20.037	72	249390000	268440000	265220000	238110000	78955000
Q61151	Serine/threonine-protein phosphatase 2A 56 kDa regulatory subunit epsilon isoform	Ppp2r5e	0.0760074	0.692091	-0.176757	0.884689	0.347925	1	-0.134622	0.910908	0.759086	0.965466	0.0421349	1.02964	28.3009	28.4825	28.4464	28.4398	28.7578	28.7261	28.4611	28.6077	28.418	28.7836	28.3199	28.346	28.8652	28.4453			biological regulation;cellular process;response to stimulus;signal transduction	cell part;cytoplasm;macromolecular complex;protein complex;protein serine/threonine phosphatase complex	Meiosis - yeast;mRNA surveillance pathway;Oocyte meiosis;Wnt signaling pathway	B56	12	12	10	28.1	28.1	24	54.713	0	163.26	92	414170000	462230000	321850000	372360000	112120000
P60335	Poly(rC)-binding protein 1	Pcbp1	0.0760643	0.73011	-0.126947	0.915767	0.734657	1	0.03388	1.02376	0.0818067	0.801243	0.160827	1.11793	30.2753	30.277	30.0765	30.1012	30.3142	30.3873	30.3415	30.3187	30.1855	30.3995	29.9833	30.0351	30.2105	30.1147			biological regulation;cellular metabolic process;cellular nitrogen compound metabolic process;cellular process;macromolecule metabolic process;metabolic process;mRNA metabolic process;mRNA processing;nitrogen compound metabolic process;nucleobase-containing compound metabolic process;primary metabolic process;regulation of translation;RNA metabolic process;RNA processing	cell part;cytoplasm;extracellular organelle;intracellular membrane-bounded organelle;intracellular organelle;macromolecular complex;membrane;nucleoplasm;organelle;ribonucleoprotein complex;vesicle	Spliceosome	KH_1	14	14	10	68.3	68.3	55.1	37.497	0	181.01	245	1393900000	1454300000	1179500000	1206100000	287140000
Q9JI91	Alpha-actinin-2	Actn2	0.0762994	0.491313	0.43799	1.35472	0.00623167	0.525787	0.532216	1.44615	0.632617	0.926292	0.0942257	1.06749	30.3567	30.4603	30.0594	30.5435	29.8305	30.0571	30.3696	29.3501	29.9776	29.6933	30.0705	29.8578	29.5577	29.9345			biological regulation;cell junction organization;cellular component assembly;cellular component organization;cellular homeostasis;cellular ion homeostasis;cellular process;homeostatic process;macromolecular complex assembly;multicellular organismal process;muscle contraction;protein complex assembly;regulation of transport	cell part;cell projection;cytoskeleton;extracellular organelle;filopodium;intracellular non-membrane-bounded organelle;intracellular organelle;organelle;vesicle	Adherens junction;Amoebiasis;Arrhythmogenic right ventricular cardiomyopathy (ARVC);Focal adhesion;Leukocyte transendothelial migration;Regulation of actin cytoskeleton;Systemic lupus erythematosus;Tight junction	CH;EFhand_Ca_insen;Spectrin	45	33	33	56.4	42.6	42.6	103.83	0	182.7	280	1631900000	1561700000	923570000	1633600000	227620000
Q8CGC7	Bifunctional glutamate/proline--tRNA ligase	Eprs1	0.0766576	0.679731	-0.206485	0.866646	0.903387	1	-0.0159089	0.989033	0.187568	0.800824	0.190576	1.14122	28.7139	28.7682	28.7527	28.563	28.8916	28.9211	29.1362	28.9447	28.6363	28.861	28.5962	28.4937	29.0565	28.5696			amine metabolic process;biological regulation;cellular amino acid metabolic process;cellular ketone metabolic process;cellular metabolic process;cellular nitrogen compound metabolic process;cellular process;macromolecule metabolic process;metabolic process;nitrogen compound metabolic process;nucleobase-containing compound metabolic process;organic acid metabolic process;primary metabolic process;…	cell part;cytoplasm;macromolecular complex;membrane;protein complex;ribonucleoprotein complex	Aminoacyl-tRNA biosynthesis;Porphyrin and chlorophyll metabolism	GST_C_3;HGTP_anticodon;ProRS-C_1;tRNA-synt_1c;tRNA-synt_1c_C;tRNA-synt_2b;WHEP-TRS	32	32	32	28.1	28.1	28.1	170.08	0	77.281	150	483960000	533980000	495530000	457720000	104190000
Q922Q8	Leucine-rich repeat-containing protein 59	Lrrc59	0.0768952	0.469807	-0.622038	0.649752	0.911776	1	-0.0179059	0.987665	0.0660549	0.479384	0.604132	1.52006	26.7033	26.4937	26.8844	26.7877	28.0191	27.609	27.3737	27.2333	26.4615	27.0996	26.4802	26.5451	26.6055	26.9455				cell part;endoplasmic reticulum;intracellular membrane-bounded organelle;intracellular non-membrane-bounded organelle;intracellular organelle;membrane;nuclear envelope;organelle		LRR_1;LRR_8	7	7	7	32.6	32.6	32.6	34.877	0	16.396	43	141010000	116900000	111350000	145990000	68995000
Q9QXJ1	Amyloid-beta A4 precursor protein-binding family B member 1	Apbb1	0.0771431	0.656465	-0.238955	0.847359	0.0568752	0.901407	-0.329656	0.795726	0.461675	0.911942	-0.0907017	0.939066	24.3817	24.5092	24.8699	24.5559	24.8669	25.0112	24.789	24.625	24.7985	25.0194	24.6707	24.8543	25.2329	24.7668			behavior;biological regulation;biosynthetic process;cell death;cell motility;cellular component movement;cellular component organization;cellular metabolic process;cellular nitrogen compound metabolic process;cellular process;chromatin modification;chromatin organization;chromosome organization;death;DNA metabolic process;DNA repair;extracellular matrix organization;extracellular structure organi…	cell part;cell projection;cytoplasm;intracellular membrane-bounded organelle;intracellular organelle;membrane;nucleus;organelle;plasma membrane;site of polarized growth;synapse	Alzheimer's disease	PID;WW	5	5	5	9.6	9.6	9.6	77.383	0	6.1236	7	18438000	23741000	24322000	19246000	7991100
P61222	ATP-binding cassette sub-family E member 1	Abce1	0.0771892	0.424667	0.918775	1.89051	0.971212	1	0.00893221	1.00621	0.066412	0.416347	-0.909843	0.532243	24.6038	25.0254	24.8681	24.5746	23.3041	24.0232	22.9026	23.8632	25.1529	24.3697	24.7031	24.4718	24.778	25.4726				cell part;cytoplasm;intracellular membrane-bounded organelle;intracellular organelle;membrane;mitochondrion;organelle		ABC_tran;Fer4;RLI	2	2	2	4	4	4	67.314	0	5.08	12	25037000	29359000	24485000	32880000	5385400
P63328	Serine/threonine-protein phosphatase 2B catalytic subunit alpha isoform	Ppp3ca	0.0773585	0.618419	0.270208	1.20598	0.196969	1	0.230303	1.17308	0.81342	0.96974	-0.0399048	0.972719	32.3735	32.1345	32.4429	32.4614	32.2352	31.919	32.0551	31.8325	32.3725	32.3185	32.2268	32.0594	31.6463	32.3629			anatomical structure development;biological regulation;cell development;cellular homeostasis;cellular ion homeostasis;cellular metabolic process;cellular process;developmental process;establishment of localization;homeostatic process;ion transport;macromolecule metabolic process;macromolecule modification;metabolic process;multicellular organismal process;muscle adaptation;nuclear transport;nucle…	cell part;cytoplasm;cytosol;extracellular organelle;intracellular membrane-bounded organelle;intracellular organelle;macromolecular complex;membrane;mitochondrion;nucleoplasm;nucleus;organelle;plasma membrane;protein complex;protein serine/threonine phosphatase complex;vesicle	Alzheimer's disease;Amyotrophic lateral sclerosis (ALS);Apoptosis;Axon guidance;B cell receptor signaling pathway;Calcium signaling pathway;ko05152;Long-term potentiation;MAPK signaling pathway;Natural killer cell mediated cytotoxicity;Oocyte meiosis;Osteoclast differentiation;T cell receptor signaling pathway;VEGF signaling pathway;Wnt signaling pathway	Metallophos	26	26	16	47.8	47.8	29.4	58.643	0	323.31	559	5649900000	4792200000	6070900000	5738900000	1301300000
Q5EBJ4	Ermin	Ermn	0.0774479	0.539461	-0.359746	0.779302	0.638395	1	-0.0969333	0.935018	0.270787	0.764797	0.262813	1.19982	25.0588	24.9808	25.0057	24.7794	25.018	25.0629	25.1696	25.5991	25.73	24.5791	24.8613	24.96	25.4716	25.3937			anatomical structure morphogenesis;biological regulation;cellular component organization;cellular process;cytoskeleton organization;developmental process;multicellular organismal process;organelle organization	cell body;cell cortex;cell part;cell projection;cytoplasm;cytoskeleton;extracellular organelle;filopodium;intracellular non-membrane-bounded organelle;intracellular organelle;neuronal cell body;organelle;vesicle			5	5	5	22.8	22.8	22.8	32.148	0	5.7734	3	41816000	35591000	19604000	54399000	10532000
Q60634	Flotillin-2	Flot2	0.0775845	0.490505	-0.44925	0.732424	0.315544	1	-0.221091	0.857916	0.223871	0.772416	0.228159	1.17134	29.1366	28.4126	28.4523	28.3796	29.2744	29.1358	29.2705	28.9707	28.5713	28.6815	28.6694	28.7344	29.2673	28.7293			biological adhesion;biological regulation;cell adhesion;cellular process;establishment of localization;regulation of protein stability	cell part;cytoplasmic membrane-bounded vesicle;endosome;extracellular organelle;intracellular membrane-bounded organelle;intracellular organelle;macromolecular complex;membrane;organelle;protein complex;vesicle	Insulin signaling pathway	Band_7	21	21	21	55.4	55.4	55.4	47.037	0	93.402	141	579160000	365250000	358490000	378590000	115550000
Q61656	Probable ATP-dependent RNA helicase DDX5	Ddx5	0.0778018	0.697388	-0.170681	0.888423	0.681985	1	-0.0316555	0.978297	0.142994	0.851196	0.139026	1.10116	31.9574	32.1295	31.9585	31.9525	32.1468	32.0561	32.3876	32.2294	32.0309	32.1386	32.0497	32.1229	31.8253	32.0192			biological regulation;biosynthetic process;cellular metabolic process;cellular nitrogen compound metabolic process;cellular process;developmental process;embryo development;macromolecule metabolic process;metabolic process;mRNA metabolic process;mRNA processing;nitrogen compound metabolic process;nucleobase-containing compound metabolic process;primary metabolic process;response to stimulus;rhyth…	cell part;cytoplasm;extracellular organelle;intracellular membrane-bounded organelle;intracellular non-membrane-bounded organelle;intracellular organelle;macromolecular complex;membrane;nucleolus;nucleoplasm;nucleus;organelle;ribonucleoprotein complex;spliceosomal complex;vesicle		DEAD;Helicase_C;P68HR	44	44	34	64	64	51.6	69.289	0	293.35	778	4560700000	5043100000	3917900000	4278300000	1082900000
Q6A068;A0A1W2P7S8;A0A1W2P855;A0A1W2P7Z8;A0A1W2P7H4;A0A1W2P6Q8	Cell division cycle 5-like protein	Cdc5l	0.0778022	0.633341	-0.258672	0.835857	0.331631	1	0.0602099	1.04262	0.0226714	0.562638	0.318882	1.24736	27.4011	27.2625	27.2611	27.2137	27.6298	27.4945	27.7181	27.7211	27.1529	27.1785	27.123	27.185	27.2973	27.3382			biological regulation;biosynthetic process;cellular metabolic process;cellular nitrogen compound metabolic process;cellular process;DNA metabolic process;DNA repair;macromolecule metabolic process;metabolic process;mRNA metabolic process;mRNA processing;nitrogen compound metabolic process;nucleobase-containing compound metabolic process;primary metabolic process;response to DNA damage stimulus;re…	cell part;cytoplasm;intracellular membrane-bounded organelle;intracellular non-membrane-bounded organelle;intracellular organelle;macromolecular complex;membrane;nucleolus;nucleoplasm;nucleus;organelle;protein complex;ribonucleoprotein complex;spliceosomal complex	Spliceosome	Myb_Cef	15	15	15	26.8	26.8	26.8	92.188	0	25.865	63	196080000	213790000	175340000	159910000	38897000
Q8K3E5	Jouberin	Ahi1	0.0784353	0.590234	0.304868	1.23531	0.871037	1	0.0577418	1.04084	0.424349	0.84455	-0.247126	0.842573	26.5636	27.1784	26.6694	26.9009	26.6499	26.4914	26.2631	26.5073	26.7042	26.9131	26.2019	26.6547	27.7834	26.2985			anatomical structure development;anatomical structure formation involved in morphogenesis;anatomical structure morphogenesis;biological regulation;cell development;cellular component assembly;cellular component morphogenesis;cellular component organization;cellular localization;cellular process;developmental process;establishment of localization;localization;regulation of transport;response to st…	cell part;cell projection;centrosome;cilium;intracellular non-membrane-bounded organelle;intracellular organelle;microtubule organizing center;organelle		SH3_1;WD40	11	11	11	13.1	13.1	13.1	119.65	0	21.588	32	133500000	196090000	112070000	105640000	14133000
P16460	Argininosuccinate synthase	Ass1	0.0786223	0.567718	-0.337114	0.791623	0.07488	1	-0.221733	0.857535	0.512466	0.913709	0.11538	1.08326	29.5101	29.4366	29.3977	29.3565	29.9359	29.8015	29.5388	30.1696	29.3659	29.7485	29.3536	29.6876	29.8848	29.5603			amine metabolic process;biological regulation;biosynthetic process;cellular amide metabolic process;cellular amino acid metabolic process;cellular ketone metabolic process;cellular metabolic process;cellular nitrogen compound metabolic process;cellular process;metabolic process;nitrogen compound metabolic process;nitrogen cycle metabolic process;organic acid metabolic process;primary metabolic pr…	cell part;extracellular organelle;intracellular membrane-bounded organelle;intracellular organelle;mitochondrion;organelle;vesicle	Alanine, aspartate and glutamate metabolism;Arginine and proline metabolism	Arginosuc_synth	19	19	19	42.7	42.7	42.7	46.584	0	61.38	177	944660000	843080000	803170000	765980000	206460000
P70398	Probable ubiquitin carboxyl-terminal hydrolase FAF-X	Usp9x	0.0786558	0.71519	-0.151629	0.900233	0.592141	1	-0.121677	0.919119	0.883794	0.974901	0.0299519	1.02098	29.38	29.4999	29.4651	29.3574	29.5394	29.5583	29.6421	29.7529	29.3933	29.766	29.3193	29.2623	30.1908	29.1978			anatomical structure development;biological regulation;catabolic process;cell division;cell growth;cell motility;cellular component movement;cellular component organization;cellular metabolic process;cellular process;chromosome segregation;developmental process;embryo development;growth;locomotion;macromolecule metabolic process;macromolecule modification;metabolic process;mitosis;nuclear divisio…	apical part of cell;cell part;cytoplasm;membrane;site of polarized growth		UCH	48	48	41	22.6	22.6	19.5	290.71	0	138.56	295	723820000	791730000	733650000	589480000	181080000
Q8VBZ3	Cleft lip and palate transmembrane protein 1 homolog	Clptm1	0.0787382	0.58741	-0.32059	0.800742	0.537243	1	-0.119426	0.920554	0.302853	0.834779	0.201165	1.14963	25.0176	24.7829	24.5669	24.9406	25.1563	25.4533	24.944	25.335	24.8494	24.8785	24.699	24.9391	25.4889	24.7267			biological regulation;cell differentiation;cellular process;developmental process;multicellular organismal development;multicellular organismal process	cell part;membrane		CLPTM1	3	3	3	10.1	10.1	10.1	75.29	0	10.285	17	46922000	16128000	10809000	42084000	5855900
Q8CIB5	Fermitin family homolog 2	Fermt2	0.0787845	0.462122	0.60076	1.51651	0.529196	1	1.16802	2.24704	0.726745	0.909272	0.567264	1.48171	26.6116	25.8834	26.5212	26.2389	24.8672	25.9252	25.6589	26.0061	26.1077	25.9663	26.5501	19	27.0332	27.1791			anatomical structure morphogenesis;biological adhesion;biological regulation;cell adhesion;cell junction organization;cell morphogenesis;cellular component assembly;cellular component morphogenesis;cellular component organization;cellular localization;cellular membrane organization;cellular process;developmental process;localization;macromolecular complex assembly;membrane organization;protein co…	cell cortex;cell part;cell surface;cytoplasm;cytoskeleton;intracellular membrane-bounded organelle;intracellular non-membrane-bounded organelle;intracellular organelle;nucleoplasm;nucleus;organelle		FERM_M;FERM_N;PH	5	5	5	10	10	10	77.8	0	5.2045	9	164410000	56905000	85366000	79137000	7395100
Q64727	Vinculin	Vcl	0.0788187	0.299857	2.96651	7.81645	0.757633	1	-0.062335	0.957713	0.0451044	0.324727	-3.02885	0.122525	23.7729	24.3369	23.9223	24.1162	19	24.0218	19	19	24.331	23.8866	24.0683	23.707	24.4681	24.3671			anatomical structure morphogenesis;biological adhesion;biological regulation;cell adhesion;cell growth;cell junction organization;cellular component assembly;cellular component organization;cellular localization;cellular process;developmental process;growth;localization	cell part;cytoplasm;cytoskeleton;extracellular organelle;intracellular non-membrane-bounded organelle;intracellular organelle;macromolecular complex;membrane;organelle;plasma membrane;protein complex;vesicle	Adherens junction;Amoebiasis;Bacterial invasion of epithelial cells;Focal adhesion;Leukocyte transendothelial migration;Regulation of actin cytoskeleton;Shigellosis	Vinculin	5	5	5	5.1	5.1	5.1	116.72	0.0012928	2.7112	6	18613000	18174000	9358000	16085000	0
Q62433	Protein NDRG1	Ndrg1	0.0788246	0.53701	-0.357716	0.780399	0.384747	1	-0.315734	0.803442	0.902676	0.975135	0.0419827	1.02953	27.3493	27.2133	27.4576	27.2997	27.8312	27.938	27.1699	27.9505	27.5489	28.1565	27.1734	27.0118	28.5393	27.3476			biological regulation;cell activation;cellular component organization;cellular membrane organization;cellular process;immune system process;membrane organization;plasma membrane organization;response to chemical stimulus;response to DNA damage stimulus;response to stimulus;response to stress;signal transduction	cell part;centrosome;cytoplasm;cytoskeleton;cytosol;extracellular organelle;intracellular membrane-bounded organelle;intracellular non-membrane-bounded organelle;intracellular organelle;macromolecular complex;membrane;microtubule organizing center;nucleus;organelle;plasma membrane;protein complex;vesicle		Ndr	8	8	8	33.8	33.8	33.8	43.008	0	70.576	88	184120000	160330000	194410000	174760000	50503000
Q922Q1	Mitochondrial amidoxime reducing component 2	Mtarc2	0.0789345	0.585528	-0.318747	0.801766	0.348584	1	-0.192234	0.87525	0.399682	0.886734	0.126513	1.09165	27.6777	27.2019	27.517	27.9164	27.9071	28.1373	27.6857	27.9029	27.852	27.5595	27.7912	27.91	27.4536	28.1382			metabolic process;nitrogen compound metabolic process	cell part;extracellular organelle;intracellular membrane-bounded organelle;intracellular organelle;membrane;microbody;mitochondrion;organelle;peroxisome;vesicle		MOSC;MOSC_N	9	9	9	23.4	23.4	23.4	38.194	0	14.659	53	233160000	157920000	181300000	299950000	53116000
P63040	Complexin-1	Cplx1	0.0791602	0.542465	-0.366029	0.775915	0.927528	1	-0.0153267	0.989433	0.0625542	0.575506	0.350702	1.27518	26.6259	26.2829	26.8523	26.7708	27.0677	27.4547	26.8171	26.8105	26.8449	26.7544	26.4186	26.432	26.6557	26.9808			biological regulation;cellular process;establishment of localization;exocytosis;hormone transport;peptide transport;secretion;transport;vesicle-mediated transport	cell body;cell part;cell projection;cytosol;macromolecular complex;neuron projection;neuronal cell body;protein complex;synapse		Synaphin	5	5	3	48.5	48.5	39.6	15.122	0	35.73	39	55474000	45556000	62098000	67973000	65838000
Q8R464	Cell adhesion molecule 4	Cadm4	0.0791703	0.524898	-0.381557	0.767609	0.0640215	0.75022	-0.482132	0.715919	0.648964	0.926307	-0.100575	0.932661	25.1673	24.5712	24.898	25.0083	25.1906	25.5111	24.8307	25.5524	25.379	25.3148	24.8676	25.3805	25.4954	25.9083			biological adhesion;cell adhesion;cellular process	cell part;extracellular organelle;organelle;vesicle		C2-set_2;V-set	5	5	5	21.6	21.6	21.6	42.723	0	12.944	20	39926000	15842000	26131000	34848000	12659000
O89053	Coronin-1A	Coro1a	0.0793067	0.692664	0.178584	1.13177	0.0654158	1	0.217961	1.16309	0.744266	0.967541	0.0393776	1.02767	31.3715	31.4	31.3892	31.3737	31.1143	31.4031	30.9631	31.3055	31.2391	31.4118	31.2888	31.1595	30.9038	31.0643			biological adhesion;biological regulation;cell adhesion;cell motility;cellular component assembly;cellular component movement;cellular component organization;cellular membrane organization;cellular process;cytoskeleton organization;endocytosis;establishment of localization;homeostatic process;immune system process;ion transport;locomotion;membrane fusion;membrane invagination;membrane organizatio…	cell leading edge;cell part;cell projection;cytoplasm;cytoplasmic membrane-bounded vesicle;cytoskeleton;endosome;extracellular organelle;intracellular membrane-bounded organelle;intracellular non-membrane-bounded organelle;intracellular organelle;macromolecular complex;membrane;neuron projection;organelle;plasma membrane;protein complex;vesicle	ko05152;Phagosome	DUF1899;DUF1900;WD40	19	19	19	46.9	46.9	46.9	50.989	0	249.67	314	2974200000	3128000000	2541800000	2823600000	609290000
Q9CZ30	Obg-like ATPase 1	Ola1	0.0796468	0.655924	0.240784	1.18163	0.160744	0.985511	0.395273	1.31519	0.497349	0.886856	0.154489	1.11303	29.7823	30.0664	29.9445	29.5877	29.755	29.709	29.4239	29.6585	29.4756	29.7696	29.6165	29.3904	29.7998	28.6734				cell part;centrosome;cytoplasm;extracellular organelle;intracellular non-membrane-bounded organelle;intracellular organelle;membrane;microtubule organizing center;nucleolus;organelle;vesicle		MMR_HSR1;YchF-GTPase_C	16	16	16	41.7	41.7	41.7	44.729	0	68.471	169	939090000	1357100000	1109700000	794060000	217480000
Q505D1	Serine/threonine-protein phosphatase 6 regulatory ankyrin repeat subunit A	Ankrd28	0.0796544	0.293494	3.17018	9.00158	0.408214	1	1.08166	2.11647	0.263381	0.544431	-2.08852	0.235122	24.1108	24.7385	24.2145	24.4707	19	19	19	24.1746	24.8925	24.6524	24.4535	24.2559	19	24.1479				cell part;nucleoplasm		Ank;Ank_2	4	4	4	5.1	5.1	5.1	112.9	0	7.9863	5	15581000	26606000	20350000	23343000	3463300
P62843	40S ribosomal protein S15	Rps15	0.0797507	0.445116	0.73548	1.66495	0.942593	1	0.0117309	1.00816	0.0619746	0.466673	-0.72375	0.605522	30.177	30.0471	30.1348	29.8092	28.3146	28.9927	29.3344	29.8334	30.0576	29.8289	30.2692	29.8036	30.386	29.8639			biosynthetic process;cell differentiation;cellular component assembly;cellular component organization;cellular localization;cellular macromolecular complex assembly;cellular metabolic process;cellular nitrogen compound metabolic process;cellular process;developmental process;establishment of localization;localization;macromolecular complex assembly;macromolecule metabolic process;metabolic proces…	cell part;cytoplasm;macromolecular complex;membrane;ribonucleoprotein complex;small ribosomal subunit	Ribosome	Ribosomal_S19	4	4	4	22.8	22.8	22.8	17.04	0	11.038	42	1205700000	1222600000	1131000000	1029100000	62225000
A2RT62	F-box/LRR-repeat protein 16	Fbxl16	0.0797651	0.681822	-0.205706	0.867115	0.886574	1	0.0259889	1.01818	0.204266	0.76665	0.231694	1.17421	28.1215	28.1931	28.1021	27.9292	28.273	28.5408	28.3678	28.1892	28.09	28.3839	28.0639	27.8298	28.3867	27.6382				cell part;cytoplasm		LRR_7	14	14	14	34.2	34.2	34.2	51.878	0	98.85	95	291560000	322980000	265420000	239410000	81677000
Q61330	Contactin-2	Cntn2	0.0798341	0.631755	-0.259407	0.835431	0.0252182	0.738694	-0.41187	0.751649	0.37138	0.870659	-0.152462	0.899714	27.0617	27.1611	27.284	27.0875	27.1065	27.4499	27.5899	27.6603	27.2332	27.1284	27.5264	27.857	27.7099	27.5805			behavior;biological adhesion;biological regulation;cell adhesion;cell motility;cell recognition;cellular component movement;cellular component organization;cellular localization;cellular membrane organization;cellular metabolic process;cellular process;cytoskeleton organization;endocytosis;establishment of localization;localization;locomotion;macromolecule metabolic process;membrane invagination;…	cell body;cell part;cell projection;cell surface;membrane;neuron projection;neuronal cell body;plasma membrane	Cell adhesion molecules (CAMs)	fn3;I-set	13	13	13	18.3	18.3	18.3	113.22	0	28.57	76	147140000	173040000	138650000	124230000	30838000
O89032	SH3 and PX domain-containing protein 2A	Sh3pxd2a	0.0798443	0.31588	2.27073	4.82566	0.195865	0.744696	1.53208	2.89203	0.598605	0.851458	-0.738643	0.599303	22.4894	23.2291	22.6062	22.9323	19	19	22.1762	19	23.5414	22.4893	23.0554	22.8662	19	19			anatomical structure formation involved in morphogenesis;cellular metabolic process;cellular process;developmental process;metabolic process;syncytium formation	cell part;cell projection;cytoplasm;intracellular non-membrane-bounded organelle;intracellular organelle;macromolecular complex;organelle;protein complex		PX;SH3_1	2	2	2	1.8	1.8	1.8	124.2	0.0052469	2.2633	3	5026500	7692800	5263500	6170600	0
Q9WUK2	Eukaryotic translation initiation factor 4H	Eif4h	0.080271	0.421479	0.8436	1.79452	0.656093	1	0.20466	1.15241	0.214149	0.584539	-0.63894	0.642184	26.6674	26.3554	26.2623	27.2451	26.0659	25.4438	24.8206	25.8661	26.7484	25.5266	27.6725	26.2003	26.3256	26.4145			developmental process;growth;reproduction	cell part;membrane		RRM_1	5	5	5	27.8	27.8	27.8	27.341	0	11.677	15	108410000	74325000	66382000	139660000	18921000
Q91VN4	MICOS complex subunit Mic25	Chchd6	0.0818604	0.542751	0.369104	1.29155	0.81587	1	0.0649892	1.04608	0.257289	0.743407	-0.304115	0.809939	30.5097	30.2947	30.4236	30.8908	29.825	30.2015	30.0309	30.1542	30.5914	29.8846	30.5889	30.7164	30.0718	31.062			cellular component organization;cellular membrane organization;cellular process;membrane organization;mitochondrion organization;organelle organization;response to DNA damage stimulus;response to stimulus;response to stress	cell part;intracellular membrane-bounded organelle;intracellular organelle;membrane;mitochondrion;organelle		DUF737	17	17	17	57.5	57.5	57.5	29.852	0	108.13	219	1406600000	1633800000	1401900000	2129000000	269390000
Q8R191	Synaptogyrin-3	Syngr3	0.0821725	0.680038	-0.209436	0.864876	0.0324184	1	-0.243462	0.844716	0.720525	0.96793	-0.034026	0.976691	29.5998	29.7531	29.5731	29.3973	29.7487	30.0087	29.6401	29.8989	29.6547	29.805	29.7395	29.8737	30.0173	29.6858			anatomical structure development;biological regulation;developmental process;regulation of transport	cell part;cytoplasmic membrane-bounded vesicle;intracellular membrane-bounded organelle;intracellular organelle;membrane;organelle;synapse;vesicle		MARVEL	6	6	6	27.5	27.5	27.5	24.561	0	17.618	92	905290000	994740000	832370000	845350000	232250000
Q6ZPJ3	(E3-independent) E2 ubiquitin-conjugating enzyme UBE2O	Ube2o	0.0822381	0.706485	-0.16233	0.893581	0.688217	1	-0.0583013	0.960394	0.465948	0.915015	0.104028	1.07477	27.4209	27.3863	27.2658	27.2946	27.5147	27.6386	27.2727	27.6106	27.4845	27.6125	27.2278	27.2133	27.7612	27.1862			biological regulation;cellular metabolic process;cellular process;endosome transport;establishment of localization;macromolecule metabolic process;macromolecule modification;metabolic process;primary metabolic process;protein metabolic process;protein modification by small protein conjugation or removal;protein modification process;transport;vesicle-mediated transport	cell part;cytoplasm;intracellular membrane-bounded organelle;intracellular organelle;nucleoplasm;nucleus;organelle	Ubiquitin mediated proteolysis	UQ_con	15	15	15	17.2	17.2	17.2	140.83	0	32.832	74	240710000	204230000	186130000	176190000	50272000
Q9QUJ7	Long-chain-fatty-acid--CoA ligase 4	Acsl4	0.0824409	0.680293	-0.212367	0.86312	0.305554	1	-0.265344	0.832	0.808979	0.964935	-0.0529766	0.963945	25.0727	24.9566	25.3438	25.0407	25.0802	25.4482	25.4292	25.2908	25.3307	25.5504	25.1558	25.1912	26.0566	24.89			anatomical structure development;biological regulation;biosynthetic process;cell differentiation;cellular ketone metabolic process;cellular lipid metabolic process;cellular metabolic process;cellular process;developmental process;establishment of localization;glycerol ether metabolic process;lipid metabolic process;lipid transport;metabolic process;multicellular organismal process;organic acid me…	cell body;cell part;cytoplasm;extracellular organelle;intracellular membrane-bounded organelle;intracellular organelle;lipid particle;membrane;microbody;mitochondrion;neuronal cell body;organelle;vesicle	Adipocytokine signaling pathway;Fatty acid metabolism;Peroxisome;PPAR signaling pathway	AMP-binding	5	4	4	8.3	6.8	6.8	79.076	0	7.0934	14	27997000	41716000	54981000	37088000	12260000
Q3KNM2	E3 ubiquitin-protein ligase MARCHF5	Marchf5	0.0824588	0.339259	-2.02809	0.24518	0.399818	1	-1.20837	0.432758	0.335019	0.676262	0.819723	1.76507	23.0607	19	19	22.8173	23.0817	23.1155	23.0104	22.945	22.8353	23.0818	19	22.9247	22.7382	23.1446			biological regulation;cellular localization;cellular metabolic process;cellular process;localization;macromolecule metabolic process;macromolecule modification;metabolic process;primary metabolic process;protein metabolic process;protein modification by small protein conjugation or removal;protein modification process;regulation of organelle organization	cell part;endoplasmic reticulum;intracellular membrane-bounded organelle;intracellular organelle;membrane;organelle		RINGv	2	2	2	9	9	9	31.231	0.0088522	1.8793	1	7618600	0	0	6340200	2081500
Q6Y685;Q9JJG0	Transforming acidic coiled-coil-containing protein 1	Tacc1	0.0824712	0.32651	-2.26099	0.208628	0.83995	1	0.355041	1.27902	0.0493941	0.335582	2.61603	6.13062	23.3246	19	19	23.4434	23.4077	23.3635	23.4669	23.7789	23.2481	19	23.8152	23.3696	19	19			anatomical structure development;biological regulation;cell cycle;cell differentiation;cell division;cell proliferation;cellular component organization;cellular localization;cellular process;cytoskeleton organization;developmental process;localization;organelle localization;organelle organization	cell part;cytoplasm;cytoskeleton;intracellular membrane-bounded organelle;intracellular non-membrane-bounded organelle;intracellular organelle;microtubule organizing center;nucleolus;nucleoplasm;nucleus;organelle		TACC	2	2	2	2.3	2.3	2.3	83.951	0.0060643	2.1248	5	10505000	0	0	11360000	2907100
Q91XV3	Brain acid soluble protein 1	Basp1	0.0825004	0.472944	0.646658	1.56554	0.84846	1	0.0723869	1.05145	0.215647	0.60896	-0.574271	0.671625	35.6636	35.673	35.6316	35.5791	34.0901	34.7179	35.5064	34.9905	35.6459	34.5368	36.3388	36.0262	35.1625	35.7578			anatomical structure development;biological regulation;cell differentiation;cellular process;developmental process	cell part;cytoplasm;extracellular organelle;intracellular membrane-bounded organelle;intracellular organelle;macromolecular complex;membrane;nucleus;organelle;plasma membrane;protein complex;site of polarized growth;vesicle		BASP1	34	34	34	95.6	95.6	95.6	22.086	0	323.31	2261	58651000000	49716000000	58859000000	54192000000	6200800000
Q8BLY2	Threonine--tRNA ligase 2, cytoplasmic	Tars3	0.0826645	0.48232	-0.480637	0.716661	0.79545	1	-0.0618225	0.958053	0.022316	0.495462	0.418814	1.33683	25.4633	26.2035	25.389	25.1399	26.2524	26.203	26.1732	25.7951	25.7241	25.9318	25.4468	25.4072	25.5379	25.7301			amine metabolic process;cellular amino acid metabolic process;cellular ketone metabolic process;cellular metabolic process;cellular nitrogen compound metabolic process;cellular process;macromolecule metabolic process;metabolic process;nitrogen compound metabolic process;nucleobase-containing compound metabolic process;organic acid metabolic process;primary metabolic process;RNA metabolic process;…	cell part;cytoplasm	Aminoacyl-tRNA biosynthesis	HGTP_anticodon;TGS;tRNA_SAD;tRNA-synt_2b	8	7	7	11.1	10.1	10.1	91.317	0	19.332	19	61858000	84512000	51796000	69893000	13542000
Q3U0V1	Far upstream element-binding protein 2	Khsrp	0.0827186	0.538042	-0.365669	0.776109	0.562143	1	-0.108036	0.92785	0.137591	0.718544	0.257632	1.19552	24.546	23.9276	24.3363	24.5471	24.2978	24.9736	24.813	24.7557	24.6844	24.4651	24.2389	24.7649	24.1808	24.5867			biological regulation;biosynthetic process;catabolic process;cellular metabolic process;cellular nitrogen compound metabolic process;cellular process;establishment of localization;macromolecule metabolic process;metabolic process;mRNA metabolic process;mRNA processing;nitrogen compound metabolic process;nucleobase-containing compound metabolic process;nucleobase-containing compound transport;prim…	cell part;cytosol;intracellular non-membrane-bounded organelle;intracellular organelle;macromolecular complex;membrane;nucleoplasm;organelle;ribonucleoprotein complex		DUF1897;KH_1	3	3	3	5.9	5.9	5.9	76.775	0	6.5516	14	30331000	27157000	16917000	20091000	4816200
Q8R0Y6	Cytosolic 10-formyltetrahydrofolate dehydrogenase	Aldh1l1	0.0827546	0.540424	-0.369631	0.77398	0.0972297	1	-0.207618	0.865966	0.39522	0.869887	0.162013	1.11885	29.3482	29.2438	29.3427	29.1522	29.9166	29.9897	29.3605	29.7517	29.1884	29.7128	29.2772	29.4123	29.6655	29.3289			biosynthetic process;catabolic process;cellular aromatic compound metabolic process;cellular metabolic process;cellular nitrogen compound metabolic process;cellular process;cofactor metabolic process;heterocycle metabolic process;metabolic process;nitrogen compound metabolic process;one-carbon metabolic process;small molecule metabolic process	cell part;extracellular organelle;intracellular membrane-bounded organelle;intracellular organelle;mitochondrion;organelle;vesicle	One carbon pool by folate	Aldedh;Formyl_trans_C;Formyl_trans_N;PP-binding	32	32	32	47.8	47.8	47.8	98.708	0	190.87	230	595740000	673850000	687530000	524670000	279090000
O54946	DnaJ homolog subfamily B member 6	Dnajb6	0.0828501	0.613709	0.279648	1.2139	0.215018	1	0.282367	1.21619	0.988235	0.999319	0.00271873	1.00189	27.5069	26.9823	27.0811	27.0896	26.9107	26.9755	26.6992	26.7102	27.131	26.3229	27.2425	27.088	26.7814	26.9783			anatomical structure development;biological adhesion;biological regulation;cell adhesion;cell differentiation;cellular component organization;cellular localization;cellular metabolic process;cellular process;cytoskeleton organization;developmental process;extracellular matrix organization;extracellular structure organization;localization;macromolecule metabolic process;metabolic process;organelle…	cell part;cytoplasm;cytosol;intracellular membrane-bounded organelle;intracellular organelle;membrane;nucleoplasm;nucleus;organelle		DnaJ	7	7	6	18.6	18.6	15.9	39.807	0	16.211	49	213850000	145740000	159310000	136410000	40850000
Q9D6Y9	1,4-alpha-glucan-branching enzyme	Gbe1	0.0831244	0.542033	-0.371955	0.772735	0.12441	0.961932	-0.376583	0.77026	0.981211	0.99853	-0.00462837	0.996797	25.7251	26.0134	26.3218	26.3563	26.4303	26.7666	26.5202	26.5908	26.0724	26.8142	26.2071	26.3159	26.8813	26.185			biosynthetic process;carbohydrate metabolic process;cellular metabolic process;cellular process;energy reserve metabolic process;generation of precursor metabolites and energy;macromolecule metabolic process;metabolic process;polysaccharide metabolic process;primary metabolic process	extracellular organelle;organelle;vesicle	Starch and sucrose metabolism	Alpha-amylase;Alpha-amylase_C;CBM_48	8	8	8	16.5	16.5	16.5	80.363	0	20.876	34	64477000	69350000	52019000	84417000	16012000
Q9CYI4	Putative RNA-binding protein Luc7-like 1	Luc7l	0.083181	0.29956	-3.05658	0.120192	0.292352	0.927732	1.08395	2.11983	0.00400248	0.102	4.14053	17.637	19	19	23.3358	19	24.1462	24.4448	24.0501	24.0616	19	19	19	19	19	19			biological regulation;cellular component assembly;cellular component organization;cellular macromolecular complex assembly;cellular process;macromolecular complex assembly;ribonucleoprotein complex assembly	cell part;intracellular membrane-bounded organelle;intracellular organelle;macromolecular complex;nucleus;organelle;ribonucleoprotein complex;small nuclear ribonucleoprotein complex		LUC7	7	3	3	22.1	9.4	9.4	43.934	0.00097656	2.7592	2	3690000	0	12132000	4722600	4755500
Q9JKW0	ADP-ribosylation factor-like protein 6-interacting protein 1	Arl6ip1	0.0834301	0.273728	4.17483	18.0613	0.726857	1	0.0645398	1.04575	0.0550221	0.327661	-4.11029	0.0579002	26.1762	26.1547	26.2353	26.0516	19	19	26.4886	19	26.4094	25.9235	26.297	25.576	26.4401	26.2127			establishment of localization;protein targeting;protein transport;transport	cell part;cytoplasm;cytosol;macromolecular complex;membrane;protein complex;Sec61 translocon complex		Reticulon	2	2	2	8.9	8.9	8.9	23.437	0.00072595	4.0959	11	81462000	74004000	81293000	82104000	0
Q8CE90	Dual specificity mitogen-activated protein kinase kinase 7	Map2k7	0.0835099	0.583422	0.318516	1.24705	0.962965	1	-0.0129581	0.991058	0.197755	0.705532	-0.331474	0.794724	26.1401	26.3194	26.6773	26.117	26.1834	25.9198	25.6558	26.0572	26.1586	26.5631	26.1573	26.2766	26.9655	25.6696			biological regulation;cell death;cellular metabolic process;cellular process;death;macromolecule metabolic process;macromolecule modification;metabolic process;phosphorus metabolic process;primary metabolic process;protein metabolic process;protein modification process;protein phosphorylation;regulation of protein modification process;response to abiotic stimulus;response to chemical stimulus;res…	cell part;cytoplasm;cytosol;intracellular membrane-bounded organelle;intracellular organelle;nucleus;organelle	ErbB signaling pathway;Fc epsilon RI signaling pathway;GnRH signaling pathway;MAPK signaling pathway;Neurotrophin signaling pathway;Osteoclast differentiation;Protein processing in endoplasmic reticulum;T cell receptor signaling pathway;Toll-like receptor signaling pathway	Pkinase	8	8	8	15.7	15.7	15.7	59.312	0	12.56	33	63784000	99639000	68372000	87171000	21103000
Q6ZPE2	Myotubularin-related protein 5	Sbf1	0.0836919	0.718588	-0.156049	0.897479	0.955251	1	0.00627623	1.00436	0.136992	0.816519	0.162326	1.11909	30.3301	30.5114	30.4924	30.2778	30.5341	30.4957	30.7325	30.6004	30.4322	30.7244	30.3318	30.2475	30.3452	30.3343			biological regulation;multicellular organismal process	cell part;intracellular membrane-bounded organelle;intracellular organelle;nucleus;organelle		dDENN;DENN;GRAM;Myotub-related;PH;SBF2;uDENN	61	61	58	40.6	40.6	39.2	208.69	0	306.46	342	1348400000	1758600000	1583300000	1340400000	442130000
P70206	Plexin-A1	Plxna1	0.0837258	0.488471	0.459616	1.37518	0.0868652	0.835727	0.440621	1.35719	0.924688	0.985865	-0.0189949	0.98692	24.9927	25.4735	25.6298	24.867	25.2017	24.8733	24.4113	24.5225	24.897	25.0086	24.4796	24.5893	24.724	25.1993			anatomical structure development;anatomical structure morphogenesis;biological regulation;cell development;cellular process;developmental process;locomotion;regulation of organelle organization;response to chemical stimulus;response to external stimulus;response to stimulus;signal transduction	cell part;cytoplasm;extracellular organelle;intracellular;intracellular membrane-bounded organelle;intracellular organelle;membrane;nucleus;organelle;plasma membrane;vesicle	Axon guidance	Plexin_cytopl;PSI;Sema;TIG	9	7	7	5.1	4.1	4.1	211.1	0	5.9959	12	28285000	52722000	37832000	40267000	11024000
Q8CJ40	Rootletin	Crocc	0.0837991	0.686962	0.18872	1.13975	0.263419	1	0.148448	1.10838	0.684894	0.965519	-0.0402714	0.972472	30.0056	29.9889	29.6791	30.0738	29.647	29.7528	29.7793	29.6572	29.9043	29.7605	29.7323	29.958	29.5188	29.9724			biological regulation;cell cycle;cellular component organization;cellular localization;cellular process;establishment of localization;homeostatic process;localization;microtubule organizing center organization;organelle organization	cell part;centrosome;cytoplasm;cytoskeleton;extracellular organelle;intracellular non-membrane-bounded organelle;intracellular organelle;membrane;microtubule organizing center;organelle;photoreceptor inner segment;plasma membrane;vesicle			64	64	64	39.1	39.1	39.1	226.94	0	226.68	290	1124500000	1240100000	847270000	1295400000	186040000
P59759	Myocardin-related transcription factor B	Mrtfb	0.0838445	0.415741	0.92529	1.89907	0.375452	1	0.266827	1.20316	0.1785	0.562782	-0.658463	0.633553	27.7945	28.4644	27.8919	28.1251	27.1384	27.5573	26.8453	25.916	28.2614	28.1648	27.1983	28.2492	27.3435	28.0549			anatomical structure development;anatomical structure morphogenesis;biological regulation;biosynthetic process;cell differentiation;cellular metabolic process;cellular nitrogen compound metabolic process;cellular process;developmental process;embryo development;macromolecule metabolic process;metabolic process;nitrogen compound metabolic process;nucleobase-containing compound metabolic process;pr…	cell part;cytoplasm;intracellular membrane-bounded organelle;intracellular organelle;nucleus;organelle		RPEL;SAP	11	11	10	14.4	14.4	13.6	117.55	0	42.902	33	391290000	346930000	253890000	441470000	14152000
Q8VDU5	SNF-related serine/threonine-protein kinase	Snrk	0.0840175	0.297739	3.11065	8.63773	0.404291	1	1.08608	2.12296	0.271286	0.550647	-2.02457	0.245778	23.8358	24.446	25.0121	23.9467	19	19	24.5155	19	24.482	24.3479	24.5391	24.1367	24.0967	19			biological regulation;cellular metabolic process;cellular process;macromolecule metabolic process;macromolecule modification;metabolic process;phosphorus metabolic process;primary metabolic process;protein metabolic process;protein modification process;protein phosphorylation;response to stimulus;signal transduction	cell part;cytoplasm;intracellular membrane-bounded organelle;intracellular organelle;nucleus;organelle		Pkinase	5	5	5	11.2	11.2	11.2	81.912	0	5.6221	3	3066100	44232000	55408000	20278000	2976700
Q9CQR2	40S ribosomal protein S21	Rps21	0.0840344	0.521008	-0.397486	0.75918	0.711331	1	-0.0823073	0.944546	0.222131	0.720228	0.315179	1.24417	28.2484	28.3984	28.0203	28.0648	28.5653	28.1963	29.1142	28.7054	28.321	28.2893	28.3271	28.0631	28.8553	27.7914			biosynthetic process;cellular metabolic process;cellular nitrogen compound metabolic process;cellular process;macromolecule metabolic process;metabolic process;nitrogen compound metabolic process;nucleobase-containing compound metabolic process;primary metabolic process;ribosomal small subunit biogenesis;RNA metabolic process;RNA processing;rRNA processing;translational elongation	cell part;cytoplasm;macromolecular complex;ribonucleoprotein complex;small ribosomal subunit	Ribosome	Ribosomal_S21e	5	5	5	59	59	59	9.1413	0	62.981	85	311340000	356880000	290580000	287220000	120290000
Q8QZY1	Eukaryotic translation initiation factor 3 subunit L	Eif3l	0.0841769	0.50264	-0.432062	0.741202	0.124197	1	-0.297418	0.813707	0.516041	0.900814	0.134644	1.09782	24.6987	24.9566	25.2083	25.2416	25.5322	25.8243	25.4407	25.633	24.8618	25.5528	25.4919	25.044	25.4812	25.0488			biological regulation;cellular component assembly;cellular component organization;cellular macromolecular complex assembly;cellular process;macromolecular complex assembly;regulation of translation;ribonucleoprotein complex assembly;translational initiation	cell part;intracellular non-membrane-bounded organelle;intracellular organelle;macromolecular complex;membrane;nucleolus;nucleoplasm;organelle;protein complex;ribonucleoprotein complex		Paf67	7	7	7	12.4	12.4	12.4	66.612	0.00072333	4.0576	5	39383000	48026000	46850000	34131000	10883000
P63046	Sulfotransferase 4A1	Sult4a1	0.084223	0.49049	-0.45601	0.729	0.510458	1	-0.14268	0.905835	0.198751	0.715766	0.31333	1.24257	25.8967	25.8753	25.5471	25.3223	26.3755	26.4101	26.259	26.0469	25.4903	25.7941	25.4891	25.7977	26.3393	25.5949			cellular metabolic process;cellular process;lipid metabolic process;metabolic process;primary metabolic process;sulfur compound metabolic process	cell part;cytoplasm		Sulfotransfer_1	8	8	8	34.9	34.9	34.9	33.053	0	13.757	34	84414000	79628000	67627000	55110000	18664000
Q9DBS2	Tumor protein p63-regulated gene 1-like protein	Tprg1l	0.0843837	0.584909	-0.330567	0.795224	0.631687	1	-0.108019	0.927861	0.345451	0.832749	0.222548	1.16679	28.3624	28.4085	28.5375	28.1473	29.0582	28.959	28.5051	28.5358	28.4144	28.7059	28.4668	28.0926	29.013	28.0815				cell part;cytoplasmic membrane-bounded vesicle;extracellular organelle;intracellular membrane-bounded organelle;intracellular organelle;organelle;vesicle		hSac2	11	11	11	60.2	60.2	60.2	29.814	0	88.53	56	452190000	431110000	526660000	279660000	81701000
Q80XK6	Autophagy-related protein 2 homolog B	Atg2b	0.0846335	0.467078	-0.546139	0.684851	0.55422	1	0.350543	1.27504	0.138431	0.494172	0.896681	1.86178	26.8149	27.0428	26.7723	26.6395	27.3597	28.2541	27.0409	27.0105	27.1524	27.3933	24.5603	26.6125	26.8206	26.9476			autophagy;catabolic process;cell communication;cellular component assembly;cellular component organization;cellular metabolic process;cellular process;metabolic process;organelle assembly;organelle organization;response to external stimulus;response to extracellular stimulus;response to starvation;response to stimulus;response to stress;vacuole organization	cell part;lipid particle;membrane		ATG_C;Chorein_N	7	7	7	4.8	4.8	4.8	231.4	0	8.4884	13	125760000	155520000	122030000	110030000	5902100
Q5PR73	GTP-binding protein Di-Ras2	Diras2	0.0847739	0.670342	-0.230865	0.852124	0.0623785	1	-0.241647	0.845779	0.935912	0.991788	-0.0107819	0.992554	28.4554	28.3837	28.2414	28.2974	28.6771	28.6551	28.325	28.8306	28.3891	28.4674	28.4612	28.4788	28.9285	28.5948			biological regulation;cellular process;response to stimulus;signal transduction	cell part;membrane;plasma membrane		Ras	9	9	7	51.8	51.8	43.2	22.498	0	47.276	87	350540000	235310000	247140000	270240000	139830000
P50516	V-type proton ATPase catalytic subunit A	Atp6v1a	0.0847868	0.600078	0.300418	1.2315	0.554164	1	0.133732	1.09713	0.413928	0.871187	-0.166686	0.890887	33.7386	33.7949	33.73	33.2953	33.3123	33.5422	33.1919	33.076	33.574	33.4248	33.9088	33.8834	33.2052	33.1077			cellular metabolic process;cellular nitrogen compound metabolic process;cellular process;establishment of localization;heterocycle metabolic process;hydrogen transport;ion transport;metabolic process;nitrogen compound metabolic process;nucleobase-containing compound metabolic process;nucleobase-containing small molecule metabolic process;nucleotide metabolic process;primary metabolic process;smal…	cell part;cell projection;cytosol;extracellular organelle;intracellular membrane-bounded organelle;intracellular organelle;macromolecular complex;membrane;microvillus;mitochondrion;organelle;plasma membrane;protein complex;vesicle	Collecting duct acid secretion;Epithelial cell signaling in Helicobacter pylori infection;Oxidative phosphorylation;Phagosome;Rheumatoid arthritis;Vibrio cholerae infection	ATP-synt_ab;ATP-synt_ab_C;ATP-synt_ab_N	43	43	43	76.8	76.8	76.8	68.325	0	323.31	1169	15670000000	16951000000	14878000000	11243000000	2890900000
Q920P3	BMP/retinoic acid-inducible neural-specific protein 1	Brinp1	0.0848694	0.568641	-0.341503	0.789219	0.828233	1	-0.0369511	0.974713	0.0524768	0.611872	0.304552	1.23504	24.8423	24.3313	24.8342	25.0043	25.4567	25.0096	25.1051	24.8629	25.0384	24.5398	24.9965	24.7579	24.9921	24.6635			biological regulation;cell communication;cell death;cellular process;death;regulation of cell cycle;regulation of mitotic cell cycle;response to chemical stimulus;response to external stimulus;response to extracellular stimulus;response to stimulus	cell part;cytoplasm		MACPF	4	4	4	6.1	6.1	6.1	88.64	0	5.2019	9	31475000	21974000	36096000	41130000	3942700
P47915;W4VSN7	60S ribosomal protein L29	Rpl29	0.0849875	0.477251	0.513566	1.42757	0.75552	1	-0.0832521	0.943927	0.0814439	0.49994	-0.596818	0.661211	28.9292	29.3094	28.8955	28.8752	27.8446	28.1735	28.6004	28.8522	28.9731	28.5733	29.0319	28.9141	29.8631	29.0455			biosynthetic process;cellular metabolic process;cellular process;macromolecule metabolic process;metabolic process;primary metabolic process;protein metabolic process;translation	cell part;intracellular non-membrane-bounded organelle;intracellular organelle;macromolecular complex;organelle;ribonucleoprotein complex;ribosome	Ribosome	Ribosomal_L29e	6	6	6	31.2	31.2	31.2	17.587	0	25.031	37	542680000	696880000	506170000	535760000	59155000
P59279	Ras-related protein Rab-2B	Rab2b	0.085537	0.29566	3.15714	8.92061	0.922514	1	-0.0162969	0.988767	0.0524891	0.324615	-3.17344	0.110841	25.1655	25.0938	25.3972	25.5054	22.2634	19	19	25.4706	24.9326	24.9695	25.1503	25.6725	25.4554	25.2862			biological regulation;cellular process;establishment of localization;metabolic process;protein transport;regulation of transport;response to stimulus;signal transduction;transport;vesicle-mediated transport	cell part;extracellular organelle;membrane;organelle;plasma membrane;vesicle		Ras	8	2	2	38.9	10.6	10.6	24.198	0	7.3182	12	55033000	75565000	48739000	31362000	873680
Q923S9	Ras-related protein Rab-30	Rab30	0.085734	0.301556	3.348	10.1824	0.186659	1	-0.169538	0.889127	0.0442165	0.313532	-3.51754	0.0873204	24.4922	24.6843	24.7777	25.0525	25.269	19	19	19	24.7494	25.0263	24.9626	24.7427	24.9538	24.9207			biological regulation;cellular component organization;cellular process;establishment of localization;Golgi organization;metabolic process;organelle organization;protein transport;response to stimulus;signal transduction;transport	cell part;cytoplasm;membrane		Ras	4	4	4	20.7	20.7	20.7	23.058	0.00037693	4.6779	17	27773000	33689000	34833000	43024000	3883200
Q8JZP2	Synapsin-3	Syn3	0.0857944	0.523549	-0.394773	0.760609	0.899369	1	0.0253839	1.01775	0.117646	0.578713	0.420157	1.33807	26.1368	26.2595	26.1397	26.0583	27.0514	26.5832	26.4754	26.6248	25.9819	26.5058	25.8523	26.3995	25.6202	26.238			biological regulation;cellular process;establishment of localization;neurotransmitter transport;secretion;transport	cell part;membrane;synapse		Synapsin;Synapsin_C;Synapsin_N	13	10	10	32.8	29.9	29.9	63.314	0	14.028	32	101500000	96197000	76497000	63311000	30732000
Q8VDP4	Cell cycle and apoptosis regulator protein 2	Ccar2	0.0858518	0.590274	-0.3094	0.806977	0.540772	1	-0.0928472	0.93767	0.149585	0.758511	0.216553	1.16195	26.4103	26.9679	26.6345	26.5761	26.7964	27.1221	27.2629	26.8825	26.7191	27.0635	26.5365	26.6672	26.7789	26.654			biological regulation;cell cycle;cellular component organization;cellular metabolic process;cellular nitrogen compound metabolic process;cellular process;macromolecule metabolic process;metabolic process;mitochondrion organization;mRNA metabolic process;mRNA processing;nitrogen compound metabolic process;nucleobase-containing compound metabolic process;organelle fission;organelle organization;pri…	cell part;cytoplasm;intracellular membrane-bounded organelle;intracellular organelle;macromolecular complex;nucleus;organelle;ribonucleoprotein complex;spliceosomal complex		DBC1;S1-like	11	11	11	17.7	17.7	17.7	103	0	42.11	37	87406000	149250000	118570000	73365000	31148000
Q3UHK1	Proton myo-inositol cotransporter	Slc2a13	0.0858672	0.462275	0.679464	1.60154	0.205121	1	0.300206	1.23132	0.263694	0.718522	-0.379258	0.768833	26.2579	26.0485	25.6421	25.6834	24.5321	25.3935	24.742	25.3711	26.104	25.3876	25.9655	25.742	25.8063	25.1374			carbohydrate transport;cellular process;establishment of localization;hydrogen transport;ion transport;transmembrane transport;transport	cell part		Sugar_tr	6	6	6	12.4	12.4	12.4	69.062	0	8.5964	26	88797000	68171000	56759000	34963000	5377200
P23198	Chromobox protein homolog 3	Cbx3	0.0861332	0.490998	0.461203	1.37669	0.0205204	0.529275	0.678102	1.60003	0.419616	0.851269	0.216899	1.16223	30.0518	29.5863	29.541	29.6215	29.1765	29.8913	28.7892	29.2712	29.0666	29.0125	29.2959	29.3825	28.3652	29.0542			biological regulation;biosynthetic process;cellular component organization;cellular metabolic process;cellular nitrogen compound metabolic process;cellular process;chromatin modification;chromatin organization;chromosome organization;macromolecule metabolic process;metabolic process;nitrogen compound metabolic process;nucleobase-containing compound metabolic process;organelle organization;primary…	cell part;intracellular membrane-bounded organelle;intracellular non-membrane-bounded organelle;intracellular organelle;nuclear envelope;nucleoplasm;nucleus;organelle		Chromo;Chromo_shadow	9	9	7	44.8	44.8	29.5	20.855	0	71.694	106	1017200000	500820000	650270000	760050000	365360000
Q5SNZ0	Girdin	Ccdc88a	0.0863197	0.460235	0.588049	1.50321	0.444643	1	0.176941	1.13048	0.188566	0.664117	-0.411108	0.752046	25.9653	26.2614	25.5927	26.0187	25.0992	25.3508	25.8556	24.6451	25.9067	25.4236	26.1259	25.8234	25.4064	26.1337			biological regulation;biosynthetic process;cell motility;cellular component assembly;cellular component movement;cellular component organization;cellular metabolic process;cellular nitrogen compound metabolic process;cellular process;DNA metabolic process;DNA replication;locomotion;macromolecule metabolic process;membrane organization;metabolic process;nitrogen compound metabolic process;nucleoba…	cell part;cell projection;cytoplasmic membrane-bounded vesicle;cytosol;endoplasmic reticulum;Golgi apparatus;intracellular membrane-bounded organelle;intracellular organelle;membrane;organelle;plasma membrane;vesicle		HOOK	11	11	11	7.2	7.2	7.2	215.92	0	20.297	34	69433000	90627000	53608000	56082000	7576200
P14206	40S ribosomal protein SA	Rpsa	0.0863888	0.599978	-0.301653	0.811322	0.359999	1	-0.180749	0.882245	0.540985	0.915558	0.120904	1.08742	30.1461	30.4763	30.2106	30.1022	30.587	30.3189	30.9364	30.547	30.288	30.5372	30.3882	30.1741	30.9118	30.0615			biological adhesion;biosynthetic process;cell adhesion;cellular component assembly;cellular component organization;cellular macromolecular complex assembly;cellular metabolic process;cellular nitrogen compound metabolic process;cellular process;establishment of localization;macromolecular complex assembly;macromolecule metabolic process;metabolic process;nitrogen compound metabolic process;nuclea…	cell part;cytoplasm;extracellular organelle;intracellular membrane-bounded organelle;intracellular organelle;macromolecular complex;membrane;nucleus;organelle;plasma membrane;preribosome;ribonucleoprotein complex;small ribosomal subunit;vesicle	Ribosome	Ribosomal_S2	13	13	13	50.5	50.5	50.5	32.838	0	323.31	160	1180800000	1721900000	1175800000	1021600000	321180000
Q9QUR6	Prolyl endopeptidase	Prep	0.0864145	0.630435	-0.269325	0.829708	0.395369	1	-0.201591	0.869591	0.749413	0.947349	0.0677341	1.04807	26.4988	26.7988	26.9064	26.5772	27.2399	27.0739	26.8286	26.9799	26.7009	27.1964	26.4955	26.4452	27.3399	27.0076			macromolecule metabolic process;metabolic process;primary metabolic process;protein metabolic process	cell part;cytoplasm;intracellular membrane-bounded organelle;intracellular organelle;membrane;nucleus;organelle		Peptidase_S9;Peptidase_S9_N	16	16	16	31.1	31.1	31.1	80.751	0	34.094	52	118000000	135930000	120730000	69631000	23902000
Q80X73	Protein pelota homolog	Pelo	0.086578	0.336762	2.30504	4.94183	0.32814	0.980082	1.10989	2.15829	0.407614	0.707022	-1.19515	0.43674	23.1728	24.0241	23.5195	23.7086	19	19	21.8687	22.4864	24.151	22.2585	23.6414	23.692	23.8899	19			catabolic process;cell cycle;cell division;cell proliferation;cellular component organization;cellular metabolic process;cellular nitrogen compound metabolic process;cellular process;chromosome organization;macromolecule metabolic process;metabolic process;mRNA metabolic process;nitrogen compound metabolic process;nucleobase-containing compound metabolic process;organelle organization;primary met…	cell part;cytoplasm;intracellular membrane-bounded organelle;intracellular organelle;nucleus;organelle	mRNA surveillance pathway	eRF1_1;eRF1_2;eRF1_3	3	3	3	9.9	9.9	9.9	43.349	0.0010653	3.8044	7	11098000	20894000	6357100	13007000	0
Q8K209	Adhesion G-protein coupled receptor G1	Adgrg1	0.0866058	0.337462	2.32935	5.0258	0.459532	1	0.746516	1.67774	0.266629	0.558913	-1.58284	0.333825	22.9257	23.1704	23.1951	22.7387	23.2429	19	19	23.1476	19	19	22.8407	22.8984	23.8073	22.7583			anatomical structure development;anatomical structure formation involved in morphogenesis;biological adhesion;biological regulation;cell adhesion;cell motility;cellular component movement;cellular process;cytokine production;developmental process;locomotion;multicellular organismal process;response to stimulus;signal transduction	cell part;extracellular organelle;membrane;organelle;plasma membrane;vesicle		7tm_2;GPS	2	2	2	4.1	4.1	4.1	77.254	0.00072438	4.0746	3	12126000	9136700	8792900	4947900	2652400
Q8R313	Exocyst complex component 6	Exoc6	0.0869408	0.300854	3.58055	11.9634	0.510688	1	-0.184073	0.880214	0.0468068	0.303922	-3.76463	0.0735757	25.1439	25.1944	25.3023	25.0326	19	19	19	25.7115	25.2273	24.9669	25.7269	24.8197	26.0363	25.2122			cell differentiation;cellular process;developmental process;establishment of localization;membrane docking;protein transport;transport	cell part;macromolecular complex;membrane;plasma membrane;protein complex		Sec15	6	6	6	8.6	8.6	8.6	93.076	0	10.388	21	29472000	44695000	41963000	30151000	0
Q64010	Adapter molecule crk	Crk	0.0870027	0.29643	3.36475	10.3013	0.956347	1	-0.102893	0.931164	0.049835	0.329857	-3.46764	0.0903931	24.5585	24.9819	24.8418	19	19	19	19	19	23.904	24.2107	19	25.4529	24.5141	24.0645			biological regulation;cellular process;regulation of organelle organization;response to stimulus;signal transduction	cell part;cytoplasm;cytoskeleton;extracellular organelle;intracellular non-membrane-bounded organelle;intracellular organelle;membrane;organelle;plasma membrane;vesicle	Bacterial invasion of epithelial cells;Chemokine signaling pathway;Chronic myeloid leukemia;ErbB signaling pathway;Fc gamma R-mediated phagocytosis;Focal adhesion;Insulin signaling pathway;MAPK signaling pathway;Neurotrophin signaling pathway;Pathways in cancer;Regulation of actin cytoskeleton;Renal cell carcinoma;Shigellosis	SH2;SH3_1;SH3_2	2	2	2	10.5	10.5	10.5	33.814	0.00072966	4.1625	2	32794000	39443000	21049000	15272000	4116700
Q9Z2A0	3-phosphoinositide-dependent protein kinase 1	Pdpk1	0.0874056	0.583013	-0.332602	0.794103	0.71506	1	-0.0651148	0.955869	0.201146	0.742278	0.267487	1.20371	26.6387	26.6143	26.6316	26.3074	27.0415	27.1023	26.8102	27.0637	26.3853	26.9129	26.7075	26.3912	26.8555	26.1984			anatomical structure development;biological regulation;biosynthetic process;cell development;cell junction organization;cell motility;cellular component assembly;cellular component movement;cellular component organization;cellular metabolic process;cellular nitrogen compound metabolic process;cellular process;developmental process;locomotion;macromolecule metabolic process;macromolecule modificat…	cell part;cell projection;cytoplasm;cytoplasmic membrane-bounded vesicle;cytosol;intracellular membrane-bounded organelle;intracellular organelle;membrane;nucleus;organelle;plasma membrane;vesicle	Aldosterone-regulated sodium reabsorption;Endometrial cancer;Focal adhesion;Insulin signaling pathway;mTOR signaling pathway;Non-small cell lung cancer;PPAR signaling pathway;Prostate cancer	Pkinase	9	9	9	21.6	21.6	21.6	63.758	0	20.4	62	132080000	127590000	116800000	101180000	25378000
B9EKR1	Receptor-type tyrosine-protein phosphatase zeta	Ptprz1	0.0875317	0.492375	-0.472131	0.720899	0.0361558	0.724109	-0.504154	0.705074	0.874797	0.976658	-0.0320236	0.978047	28.1307	28.2687	28.1646	28.8591	28.3179	28.95	29.3282	28.7612	28.7821	28.6745	28.6095	28.7706	29.1183	29.1268			anatomical structure morphogenesis;behavior;biological regulation;cell differentiation;cellular component morphogenesis;cellular component organization;cellular metabolic process;cellular process;developmental process;macromolecule metabolic process;macromolecule modification;metabolic process;multicellular organismal process;neurological system process;phosphorus metabolic process;primary metabo…	cell part;extracellular matrix;membrane;plasma membrane;proteinaceous extracellular matrix	Epithelial cell signaling in Helicobacter pylori infection	Carb_anhydrase;fn3;Y_phosphatase	12	12	12	5.4	5.4	5.4	254.4	0	34.295	98	261690000	350930000	208260000	410890000	74024000
Q5U458	DnaJ homolog subfamily C member 11	Dnajc11	0.08772	0.606148	-0.291335	0.817146	0.766019	1	-0.0738682	0.950087	0.290541	0.812615	0.217467	1.16269	29.3361	28.9961	29.2212	29.6771	29.7212	29.7146	29.6465	29.5621	29.3504	29.1508	29.4085	29.5162	28.8819	29.9499				cell part;extracellular organelle;intracellular membrane-bounded organelle;intracellular organelle;membrane;mitochondrion;organelle;vesicle		DnaJ;DUF3395	24	24	24	41.1	41.1	41.1	63.232	0	81.57	134	513390000	325610000	367000000	616310000	119400000
P09405	Nucleolin	Ncl	0.0879534	0.596309	-0.306445	0.808632	0.25219	1	-0.116229	0.922596	0.236768	0.817744	0.190216	1.14093	30.0141	30.1034	30.0237	29.8558	30.3347	30.5084	30.5359	30.3373	29.812	30.1998	29.9621	29.9383	30.3106	30.1665			anatomical structure formation involved in morphogenesis;biological regulation;developmental process	cell cortex;cell part;extracellular organelle;intracellular membrane-bounded organelle;intracellular non-membrane-bounded organelle;intracellular organelle;macromolecular complex;membrane;nucleolus;nucleoplasm;nucleus;organelle;ribonucleoprotein complex;vesicle	Pathogenic Escherichia coli infection	RRM_1	27	27	27	37.1	37.1	37.1	76.722	0	222.86	304	1197900000	1236100000	1063600000	1030600000	324540000
P51150	Ras-related protein Rab-7a	Rab7a	0.0882297	0.457234	-0.600343	0.659597	0.570678	1	-0.151934	0.900043	0.105187	0.568037	0.448409	1.36453	27.7207	26.8539	27.6834	27.851	28.7659	28.1817	28.2725	27.5891	27.8288	27.5746	27.5529	27.8358	27.3036	28.129			biological regulation;catabolic process;cellular component organization;cellular homeostasis;cellular ion homeostasis;cellular metabolic process;cellular process;endosome transport;establishment of localization;homeostatic process;macromolecule metabolic process;membrane docking;metabolic process;organelle fusion;organelle organization;primary metabolic process;protein catabolic process;protein m…	cell part;cytoplasm;cytoplasmic membrane-bounded vesicle;endosome;extracellular organelle;Golgi apparatus;intracellular membrane-bounded organelle;intracellular organelle;lysosome;macromolecular complex;membrane;organelle;protein complex;retromer complex;vacuole;vesicle	Amoebiasis;Endocytosis;ko05152;Phagosome	Ras	8	8	8	51.7	51.7	51.7	23.489	0	76.429	73	275500000	146730000	248170000	296800000	80305000
Q9WTK7	Serine/threonine-protein kinase STK11	Stk11	0.0883072	0.329864	-2.53072	0.173052	0.10298	0.522476	-2.34937	0.196231	0.518359	0.881686	0.181348	1.13394	19	23.9813	23.8588	19	24.1037	24.4396	24.4452	23.8605	23.1047	23.9992	23.7245	23.6708	24.105	23.5475			anatomical structure development;anatomical structure morphogenesis;autophagy;biological regulation;catabolic process;cell death;cell development;cellular component assembly;cellular component morphogenesis;cellular component organization;cellular localization;cellular metabolic process;cellular process;death;developmental process;establishment or maintenance of cell polarity;homeostatic process;…	cell part;cytoplasm;cytosol;extracellular organelle;intracellular membrane-bounded organelle;intracellular organelle;membrane;mitochondrion;nucleus;organelle;vesicle	Adipocytokine signaling pathway;mTOR signaling pathway	Pkinase	2	2	2	7.1	7.1	7.1	49.266	0.00037523	4.611	5	0	14611000	12273000	0	4217100
[truncated: 2,647 more rows]
[truncated: 54 more columns]
