# Supplementary material for: The Beneficial Effect of Mitochondrial Transfer Therapy in 5XFAD Mice via Liver–Serum–Brain Response
Source: Cells. 2023 Mar 24;12(7):1006. doi: 10.3390/cells12071006 (PMC10093713; doi:10.3390/cells12071006)
Supplement: Supplementary file 1 [file cells-12-01006-s001.zip › Supplemental Hippocampus Phospho Proteomics excel .xlsx]

## Sheet: fractions Phospho (STY)Sites
Proteins	Positions within proteins	Leading proteins	Protein	Protein names	Gene names	Fasta headers	Localization prob	Score diff	PEP	Score	Delta score	Score for localization	Localization prob 1 Tg 1340.3 F	Score diff 1 Tg 1340.3 F	PEP 1 Tg 1340.3 F	Score 1 Tg 1340.3 F	Localization prob 10 WT 1341.1 F	Score diff 10 WT 1341.1 F	PEP 10 WT 1341.1 F	Score 10 WT 1341.1 F	Localization prob 11 WT 1341.2 F	Score diff 11 WT 1341.2 F	PEP 11 WT 1341.2 F	Score 11 WT 1341.2 F	Localization prob 12 WT 1337.1 M	Score diff 12 WT 1337.1 M	PEP 12 WT 1337.1 M	Score 12 WT 1337.1 M	Localization prob 13 WT 1337.2 M	Score diff 13 WT 1337.2 M	PEP 13 WT 1337.2 M	Score 13 WT 1337.2 M	Localization prob 14 WT 1337.3 M	Score diff 14 WT 1337.3 M	PEP 14 WT 1337.3 M	Score 14 WT 1337.3 M	Localization prob 2 Tg 1336.3 M	Score diff 2 Tg 1336.3 M	PEP 2 Tg 1336.3 M	Score 2 Tg 1336.3 M	Localization prob 3 Tg 1336.4 M	Score diff 3 Tg 1336.4 M	PEP 3 Tg 1336.4 M	Score 3 Tg 1336.4 M	Localization prob 4 Tg 1338.2 M	Score diff 4 Tg 1338.2 M	PEP 4 Tg 1338.2 M	Score 4 Tg 1338.2 M	Localization prob 5 Tg-Mito 1340.1 F
E9Q3M9	959	E9Q3M9	E9Q3M9		2010300C02Rik	>tr|E9Q3M9|E9Q3M9_MOUSE DUF4592 domain-containing protein OS=Mus musculus (Mouse) OX=10090 GN=2010300C02Rik PE=1 SV=1	0.534021	0.814355	0.0101687	32.702	23.34	26.78	0.497155	0	0.0119016	31.614	0	0		NaN	0	0		NaN	0.470642	0	0.0307382	26.292																	0.534021	0.814355	0.0101687	32.702
Q5U464	310	Q5U464	Q5U464	Arf-GAP with SH3 domain, ANK repeat and PH domain-containing protein 3	Asap3	>sp|Q5U464|ASAP3_MOUSE Arf-GAP with SH3 domain, ANK repeat and PH domain-containing protein 3 OS=Mus musculus (Mouse) OX=10090 GN=Asap3 PE=2 SV=1	0.826528	6.7803	0.01367	32.254	12.13	32.254	0	0		NaN									0	0		NaN	0.826528	6.7803	0.01367	32.254	0	0		NaN					0	0		NaN	0.76191	5.05162	0.061439	23.676
Q91XV3	36	Q91XV3	Q91XV3	Brain acid soluble protein 1	Basp1	>sp|Q91XV3|BASP1_MOUSE Brain acid soluble protein 1 OS=Mus musculus (Mouse) OX=10090 GN=Basp1 PE=1 SV=3	0.980516	17.1937	1.94993e-70	112.74	108.44	112.74	0.82848	8.23747	7.56154e-70	108.8	0	0		NaN	0.980516	17.1937	1.94993e-70	112.74	0.706735	3.97995	1.08018e-05	47.286	0.48793	0	0.00064193	38.588	0	0		NaN	0.79091	6.00783	3.85358e-16	67.496	0.890923	10.2876	4.38635e-06	50.767	0	0		NaN	0
Q8K019	177	Q8K019	Q8K019	Bcl-2-associated transcription factor 1	Bclaf1	>sp|Q8K019|BCLF1_MOUSE Bcl-2-associated transcription factor 1 OS=Mus musculus (Mouse) OX=10090 GN=Bclaf1 PE=1 SV=2	0.999714	35.4399	5.78257e-29	122.83	112.18	107.41	0.998636	28.6457	5.78257e-29	122.83	0	0		NaN	0.999153	30.7184	2.51506e-18	102.59	0.999714	35.4399	5.55791e-22	107.41	0.906045	9.84231	0.0034346	50.226	0.996183	24.1659	9.76703e-12	87.654	0.985627	18.3617	1.85301e-25	121.4	0.998831	29.3168	5.78257e-29	122.83	0.97542	15.9862	0.000155211	65.022
O88737	2860	O88737	O88737	Protein bassoon	Bsn	>sp|O88737|BSN_MOUSE Protein bassoon OS=Mus musculus (Mouse) OX=10090 GN=Bsn PE=1 SV=4	0.945217	12.8964	0.000343255	53.033	42.087	53.033	0.945217	12.8964	0.000343255	53.033	0	0		NaN	0.906534	10.5175	0.00274402	44.312	0.70451	4.23898	0.0238796	31.759	0	0		NaN	0	0		NaN	0.838964	9.81151	0.00710065	38.205	0	0		NaN	0	0		NaN
O88737	2858	O88737	O88737	Protein bassoon	Bsn	>sp|O88737|BSN_MOUSE Protein bassoon OS=Mus musculus (Mouse) OX=10090 GN=Bsn PE=1 SV=4	0.531074	0.546018	0.0187716	47.499	41.958	47.499	0	0		NaN	0	0		NaN	0.531074	0.546018	0.0187716	47.499	0	0		NaN	0	0		NaN	0	0		NaN	0	0		NaN	0	0		NaN	0	0		NaN
P11798	286	P11798	P11798	Calcium/calmodulin-dependent protein kinase type II subunit alpha	Camk2a	>sp|P11798|KCC2A_MOUSE Calcium/calmodulin-dependent protein kinase type II subunit alpha OS=Mus musculus (Mouse) OX=10090 GN=Camk2a PE=1 SV=2	0.99418	22.3254	1.49543e-12	86.575	73.208	86.575	0.4971	0	0.0321077	28.627	0.903539	9.71867	0.00119734	58.123	0.499241	0	0.0128896	34.395	0.846102	7.41145	0.0049713	50.358	0.916456	10.4024	4.25744e-07	65.855	0.872815	8.92066	0.00622904	39.427	0.93611	11.6593	5.82677e-05	62.617	0.99418	22.3254	1.49543e-12	86.575	0.497588	0	0.0302607	30.072	0
P28652	287	P28652	P28652	Calcium/calmodulin-dependent protein kinase type II subunit beta	Camk2b	>sp|P28652|KCC2B_MOUSE Calcium/calmodulin-dependent protein kinase type II subunit beta OS=Mus musculus (Mouse) OX=10090 GN=Camk2b PE=1 SV=2	1	73.6661	0.000517439	121.68	76.521	73.666					0	0		NaN	1	73.6661	0.00693498	73.666	0	0		NaN	0	0		NaN	0	0		NaN	1	121.68	0.000517439	121.68	1	67.0614	0.00389656	67.061	0	0		NaN
Q9DA73	298	Q9DA73	Q9DA73	Coiled-coil domain-containing protein 89	Ccdc89	>sp|Q9DA73|CCD89_MOUSE Coiled-coil domain-containing protein 89 OS=Mus musculus (Mouse) OX=10090 GN=Ccdc89 PE=1 SV=2	1	32.2948	0.00578033	32.295	10.745	32.295	0	0		NaN																					1	32.2948	0.00578033	32.295	0	0		NaN
Q02248	552	Q02248	Q02248	Catenin beta-1	Ctnnb1	>sp|Q02248|CTNB1_MOUSE Catenin beta-1 OS=Mus musculus (Mouse) OX=10090 GN=Ctnnb1 PE=1 SV=1	0.692644	5.3768	0.000573661	46.368	39.999	39.171	0	0		NaN					0.53249	3.23818	0.00519556	31.787	0.655284	3.72928	0.000573661	46.368									0.692644	5.3768	0.00138759	39.171	0	0		NaN	0	0		NaN
Q059Y8	260	Q059Y8	Q059Y8	DC-STAMP domain-containing protein 1	Dcst1	>sp|Q059Y8|DCST1_MOUSE E3 ubiquitin-protein ligase DCST1 OS=Mus musculus (Mouse) OX=10090 GN=Dcst1 PE=2 SV=1	0.707612	0.486371	0.00443059	21.314	6.2924	21.314									0	0		NaN													0	0		NaN	0.707612	0.486371	0.00443059	21.314	0	0		NaN	0
Q059Y8	265	Q059Y8	Q059Y8	DC-STAMP domain-containing protein 1	Dcst1	>sp|Q059Y8|DCST1_MOUSE E3 ubiquitin-protein ligase DCST1 OS=Mus musculus (Mouse) OX=10090 GN=Dcst1 PE=2 SV=1	0.878701	4.73494	0.00443059	21.314	6.2924	21.314									0	0		NaN													0	0		NaN	0.878701	4.73494	0.00443059	21.314	0	0		NaN	0
Q059Y8	261	Q059Y8	Q059Y8	DC-STAMP domain-containing protein 1	Dcst1	>sp|Q059Y8|DCST1_MOUSE E3 ubiquitin-protein ligase DCST1 OS=Mus musculus (Mouse) OX=10090 GN=Dcst1 PE=2 SV=1	0.707612	0.486371	0.00443059	21.314	6.2924	21.314									0	0		NaN													0	0		NaN	0.707612	0.486371	0.00443059	21.314	0	0		NaN	0
Q91XM9	65	Q91XM9	Q91XM9	Disks large homolog 2	Dlg2	>sp|Q91XM9|DLG2_MOUSE Disks large homolog 2 OS=Mus musculus (Mouse) OX=10090 GN=Dlg2 PE=1 SV=2	0.994418	22.563	1.39889e-07	59.046	53.789	59.046	0.983538	17.8168	3.75973e-07	54.3	0.985815	18.9005	0.00111353	42.791	0.97974	16.8542	1.96815e-07	57.902	0.98926	19.777	3.50115e-06	52.97	0	0		NaN	0	0		NaN	0.795477	6.23906	0.0171121	31.566	0	0		NaN	0.967883	14.8481	2.09997e-05	51.966	0.839587
Q62108	415	Q62108	Q62108	Disks large homolog 4	Dlg4	>sp|Q62108|DLG4_MOUSE Disks large homolog 4 OS=Mus musculus (Mouse) OX=10090 GN=Dlg4 PE=1 SV=1	0.957432	13.8878	3.61057e-35	136.49	123.6	134.29	0.955643	13.6518	5.97541e-25	120.4					0.813898	6.59904	4.1148e-18	102.98	0.79032	5.99756	1.21517e-21	106.39	0.60229	4.31992	0.0283071	39.364	0.754648	6.53669	4.83904e-14	101.17	0.957432	13.8878	5.72768e-35	134.29	0.831806	7.02753	3.61057e-35	136.49	0.626902	5.69101	0.0534801	52.185
A0A571BGC3	3073	A0A571BGC3	A0A571BGC3		Dnah14	>tr|A0A571BGC3|A0A571BGC3_MOUSE Dynein, axonemal, heavy chain 14 OS=Mus musculus (Mouse) OX=10090 GN=Dnah14 PE=4 SV=2	0.99814	33.7241	0.000560928	34.148	27.05	34.148					0	0		NaN	0.992567	27.0989	0.00182618	27.523	0	0		NaN	0.99278	27.3149	0.00182618	27.523	0	0		NaN					0.976939	21.8158	0.0079223	22.24	0.972926	22.0318	0.0079223	22.24	0.964763
A0A571BGC3	3059	A0A571BGC3	A0A571BGC3		Dnah14	>tr|A0A571BGC3|A0A571BGC3_MOUSE Dynein, axonemal, heavy chain 14 OS=Mus musculus (Mouse) OX=10090 GN=Dnah14 PE=4 SV=2	0.60491	4.87258	0.000560928	34.148	27.05	34.148					0	0		NaN	0.604312	4.93837	0.00182618	27.523	0	0		NaN	0.60281	4.93837	0.00182618	27.523	0	0		NaN					0.580378	4.52	0.0079223	22.24	0.579168	4.52	0.0079223	22.24	0.551049
Q8C3J5	1247	Q8C3J5	Q8C3J5	Dedicator of cytokinesis protein 2	Dock2	>sp|Q8C3J5|DOCK2_MOUSE Dedicator of cytokinesis protein 2 OS=Mus musculus (Mouse) OX=10090 GN=Dock2 PE=1 SV=3	0.962161	19.9955	0.00450916	20.296	12.269	20.296	0	0		NaN									0	0		NaN					0	0		NaN	0.962161	19.9955	0.00450916	20.296	0	0		NaN	0	0		NaN	0
Q03137	456	Q03137	Q03137	Ephrin type-A receptor 4	Epha4	>sp|Q03137|EPHA4_MOUSE Ephrin type-A receptor 4 OS=Mus musculus (Mouse) OX=10090 GN=Epha4 PE=1 SV=2	1	28.6243	0.016969	28.624	14.815	28.624	0	0		NaN					0	0		NaN	1	28.6243	0.016969	28.624	0	0		NaN	0	0		NaN	0	0		NaN	0	0		NaN	0	0		NaN
Q8BFZ9	264	Q8BFZ9	Q8BFZ9	Erlin-2	Erlin2	>sp|Q8BFZ9|ERLN2_MOUSE Erlin-2 OS=Mus musculus (Mouse) OX=10090 GN=Erlin2 PE=1 SV=1	0.527687	0.481468	0.0164982	29.58	17.937	29.58	0	0		NaN					0	0		NaN	0.527687	0.481468	0.0164982	29.58	0	0		NaN					0.523521	0.408908	0.0685321	23.635	0	0		NaN	0	0		NaN
Q9WTS2	350	Q9WTS2	Q9WTS2	Alpha-(1,6)-fucosyltransferase	Fut8	>sp|Q9WTS2|FUT8_MOUSE Alpha-(1,6)-fucosyltransferase OS=Mus musculus (Mouse) OX=10090 GN=Fut8 PE=1 SV=2	1	28.8121	0.00572074	28.812	16.344	28.812	0	0		NaN	0	0		NaN	0	0		NaN	0	0		NaN	1	22.538	0.0277239	22.538	1	28.8121	0.00572074	28.812	0	0		NaN									0
A0A1B0GSI5	8	A0A1B0GSI5	A0A1B0GSI5		Gm33543	>tr|A0A1B0GSI5|A0A1B0GSI5_MOUSE Predicted gene, 33543 OS=Mus musculus (Mouse) OX=10090 GN=Gm33543 PE=4 SV=1	0.519185	0.668675	0.0210621	26.786	10.013	26.786					0	0		NaN					0	0		NaN	0	0		NaN	0.519185	0.668675	0.0210621	26.786	0	0		NaN									0
Q01097	886	Q01097	Q01097	Glutamate receptor ionotropic, NMDA 2B	Grin2b	>sp|Q01097|NMDE2_MOUSE Glutamate receptor ionotropic, NMDA 2B OS=Mus musculus (Mouse) OX=10090 GN=Grin2b PE=1 SV=3	0.913949	11.508	6.28912e-08	61.276	46.083	61.276	0.913949	11.508	6.28912e-08	61.276	0.375011	0.894644	0.015384	33.248	0.437845	0	8.64905e-05	50.358	0.467542	0	0.000189043	47.016	0.419393	0	0.00634349	36.923					0.574461	1.68209	7.07859e-05	50.87	0.456043	0	0.00487734	38.736	0.434431	0	0.000428449	44.238	0
Q2NL51;Q9WV60	279;216	Q2NL51;Q9WV60	Q9WV60	Glycogen synthase kinase-3 alpha;Glycogen synthase kinase-3 beta	Gsk3a;Gsk3b	>sp|Q2NL51|GSK3A_MOUSE Glycogen synthase kinase-3 alpha OS=Mus musculus (Mouse) OX=10090 GN=Gsk3a PE=1 SV=2;>sp|Q9WV60|GSK3B_MOUSE Glycogen synthase kinase-3 beta OS=Mus musculus (Mouse) OX=10090 GN=Gsk3b PE=1 SV=2	0.771077	5.59358	0.00935596	46.069	46.069	46.069	0.771077	5.59358	0.00935596	46.069	0.690862	4.64873	0.0545845	33.273	0.710087	4.98052	0.0196041	39.73	0.731106	5.36114	0.0476641	34.264	0.740478	5.51523	0.0183994	40.475	0.724715	5.46594	0.0196041	39.73	0.722038	5.41671	0.0207759	39.006	0.707456	5.0053	0.0207759	39.006	0.740478	5.51523	0.0183994	40.475
P43276	18	P43276	P43276	Histone H1.5	Hist1h1b	>sp|P43276|H15_MOUSE Histone H1.5 OS=Mus musculus (Mouse) OX=10090 GN=H1-5 PE=1 SV=2	0.891833	10.0548	0.0127955	21.055	15.241	21.055	0	0		NaN					0	0		NaN	0.891833	10.0548	0.0127955	21.055					0	0		NaN	0	0		NaN	0	0		NaN	0	0		NaN
P43277	2	P43277	P43277	Histone H1.3	Hist1h1d	>sp|P43277|H13_MOUSE Histone H1.3 OS=Mus musculus (Mouse) OX=10090 GN=H1-3 PE=1 SV=2	0.823205	6.68039	1.46207e-05	64.705	60.988	64.705	0.823205	6.68039	1.46207e-05	64.705	0.80153	6.06226	0.00264185	46.494	0.769043	5.22419	0.00574378	40.384	0.795911	5.91046	0.00316413	44.788	0.750121	4.77401	0.0129724	24.029	0.80153	6.06226	0.00264185	46.494	0.789113	5.7309	0.00603584	39.905	0.8108	6.31992	0.000706953	52.814	0.782434	5.55858	0.000528973	47.088
P49312	6	P49312	P49312	Heterogeneous nuclear ribonucleoprotein A1;Heterogeneous nuclear ribonucleoprotein A1, N-terminally processed	Hnrnpa1	>sp|P49312|ROA1_MOUSE Heterogeneous nuclear ribonucleoprotein A1 OS=Mus musculus (Mouse) OX=10090 GN=Hnrnpa1 PE=1 SV=2	0.937298	11.746	0.0211553	42.426	31.428	38.337	0	0		NaN	0	0		NaN	0.937298	11.746	0.0410653	38.337	0.927595	11.0759	0.0211553	42.426	0	0		NaN	0	0		NaN	0	0		NaN	0	0		NaN	0	0		NaN	0
Q60668	83	Q60668	Q60668	Heterogeneous nuclear ribonucleoprotein D0	Hnrnpd	>sp|Q60668|HNRPD_MOUSE Heterogeneous nuclear ribonucleoprotein D0 OS=Mus musculus (Mouse) OX=10090 GN=Hnrnpd PE=1 SV=2	0.63391	4.06856	8.27523e-08	62.442	53.16	62.442	0	0		NaN	0	0		NaN	0.391762	0	0.0662125	25.619	0	0		NaN	0	0		NaN	0	0		NaN	0	0		NaN	0	0		NaN	0	0		NaN	0
Q8VEK3	4	Q8VEK3	Q8VEK3	Heterogeneous nuclear ribonucleoprotein U	Hnrnpu	>sp|Q8VEK3|HNRPU_MOUSE Heterogeneous nuclear ribonucleoprotein U OS=Mus musculus (Mouse) OX=10090 GN=Hnrnpu PE=1 SV=1	0.814062	6.55992	0.000688521	61.344	39.972	61.344	0.410438	1.43748	0.0141138	32.859	0	0		NaN	0.672729	5.07136	0.0192312	30.139	0.814062	6.55992	0.000688521	61.344	0.556132	1.12762	0.00274611	47.971	0.606558	4.89021	0.0164887	31.597	0.333333	0	0.0459822	23.354	0.475579	2.11159	0.00691273	38.783	0.382743	0.934716	0.040849	24.254	0
Q6P9P6	642	Q6P9P6	Q6P9P6	Kinesin-like protein KIF11	Kif11	>sp|Q6P9P6|KIF11_MOUSE Kinesin-like protein KIF11 OS=Mus musculus (Mouse) OX=10090 GN=Kif11 PE=1 SV=1	1	24.9643	0.00860533	24.964	9.5778	24.964	0	0		NaN	1	24.9643	0.00860533	24.964									0	0		NaN													0	0		NaN
Q6P9P6	637	Q6P9P6	Q6P9P6	Kinesin-like protein KIF11	Kif11	>sp|Q6P9P6|KIF11_MOUSE Kinesin-like protein KIF11 OS=Mus musculus (Mouse) OX=10090 GN=Kif11 PE=1 SV=1	1	24.9643	0.00860533	24.964	9.5778	24.964	0	0		NaN	1	24.9643	0.00860533	24.964									0	0		NaN													0	0		NaN
Q6P9P6	645	Q6P9P6	Q6P9P6	Kinesin-like protein KIF11	Kif11	>sp|Q6P9P6|KIF11_MOUSE Kinesin-like protein KIF11 OS=Mus musculus (Mouse) OX=10090 GN=Kif11 PE=1 SV=1	1	24.9643	0.00860533	24.964	9.5778	24.964	0	0		NaN	1	24.9643	0.00860533	24.964									0	0		NaN													0	0		NaN
P14873	1260	P14873	P14873	Microtubule-associated protein 1B;MAP1B heavy chain;MAP1 light chain LC1	Map1b	>sp|P14873|MAP1B_MOUSE Microtubule-associated protein 1B OS=Mus musculus (Mouse) OX=10090 GN=Map1b PE=1 SV=2	0.998501	28.4661	0.000337623	70.783	55.992	70.783	0.936558	11.7773	0.0247435	50.077	0	0		NaN	0	0		NaN					0.998501	28.4661	0.000337623	70.783	0	0		NaN	0.759916	5.02581	0.0483765	59.225	0	0		NaN					0
P14873	1395	P14873	P14873	Microtubule-associated protein 1B;MAP1B heavy chain;MAP1 light chain LC1	Map1b	>sp|P14873|MAP1B_MOUSE Microtubule-associated protein 1B OS=Mus musculus (Mouse) OX=10090 GN=Map1b PE=1 SV=2	0.948949	12.6998	1.23659e-54	99.219	95.857	99.219	0.76845	5.21204	1.64717e-43	90.397	0.76081	5.03619	2.33243e-24	77.51	0.851273	7.59991	1.18431e-16	66.972	0.764164	5.10872	4.25778e-33	83.236	0.840203	7.22599	9.70881e-24	71.927	0.937641	11.7719	1.60277e-54	97.387	0.948949	12.6998	1.23659e-54	99.219					0	0		NaN	0
P20357	1013	P20357	P20357	Microtubule-associated protein 2	Map2	>sp|P20357|MTAP2_MOUSE Microtubule-associated protein 2 OS=Mus musculus (Mouse) OX=10090 GN=Map2 PE=1 SV=2	0.695664	4.60634	0.00586506	44.584	33.325	43.955	0	0		NaN	0	0		NaN	0	0		NaN	0.645463	3.08477	0.00586506	44.584	0	0		NaN	0.554259	4.13189	0.0285573	34.174	0	0		NaN	0	0		NaN	0.643903	3.71798	0.0565488	30.489	0.695664
P20357	1783	P20357	P20357	Microtubule-associated protein 2	Map2	>sp|P20357|MTAP2_MOUSE Microtubule-associated protein 2 OS=Mus musculus (Mouse) OX=10090 GN=Map2 PE=1 SV=2	0.798711	6.81926	6.92752e-12	104.88	88.941	104.88	0	0		NaN	0	0		NaN	0.683538	3.94695	0.000147396	71.592	0.798711	6.81926	6.92752e-12	104.88	0	0		NaN	0	0		NaN	0.437376	0	0.0229636	42.068	0	0		NaN	0.681875	6.32137	8.73536e-05	74.732	0
Q6PER3	162	Q6PER3	Q6PER3	Microtubule-associated protein RP/EB family member 3	Mapre3	>sp|Q6PER3|MARE3_MOUSE Microtubule-associated protein RP/EB family member 3 OS=Mus musculus (Mouse) OX=10090 GN=Mapre3 PE=1 SV=1	0.615254	5.1288	0.00755229	38.377	27.145	38.377	0	0		NaN	0.615254	5.1288	0.00755229	38.377	0	0		NaN	0	0		NaN	0	0		NaN	0	0		NaN	0	0		NaN	0	0		NaN	0	0		NaN	0
P04370	229	P04370	P04370	Myelin basic protein	Mbp	>sp|P04370|MBP_MOUSE Myelin basic protein OS=Mus musculus (Mouse) OX=10090 GN=Mbp PE=1 SV=2	0.963441	14.4015	3.31629e-11	99.413	74.988	55.094	0.485505	0	0.0283962	36.292	0.891538	10.8402	0.0337763	50.188	0.890252	9.73362	0.0626027	31.41	0	0		NaN	0.907354	10.2711	3.31629e-11	99.413	0.845821	7.65003	0.00880678	65.175	0.913371	10.6524	0.0160766	44.44	0.960811	14.1559	0.0510304	53.504	0.963441	14.4015	0.0425895	55.094	0
Q9R0X0	134	Q9R0X0	Q9R0X0	Mediator of RNA polymerase II transcription subunit 20	Med20	>sp|Q9R0X0|MED20_MOUSE Mediator of RNA polymerase II transcription subunit 20 OS=Mus musculus (Mouse) OX=10090 GN=Med20 PE=1 SV=1	0.871568	11.3266	0.0220236	26.118	6.9859	26.118	0	0		NaN	0	0		NaN									0	0		NaN					0.871568	11.3266	0.0220236	26.118	0	0		NaN	0	0		NaN	0
Q99104	600	Q99104	Q99104	Unconventional myosin-Va	Myo5a	>sp|Q99104|MYO5A_MOUSE Unconventional myosin-Va OS=Mus musculus (Mouse) OX=10090 GN=Myo5a PE=1 SV=2	0.834202	8.98156	1.20475e-05	47.175	42.536	41.247	0.811776	8.29164	0.00139727	35.572	0.703613	6.36527	0.0112507	27.576	0.764808	7.36616	0.00625227	31.632	0.834202	8.98156	0.000453407	41.247	0.819462	8.40747	1.20475e-05	47.175	0.755091	7.19947	0.00760777	30.532	0.711147	6.89248	0.0664375	20.497	0.802861	8.14978	0.000226239	42.909	0.735239	6.94293	0.00712832	30.922	0
P19246	673	P19246	P19246	Neurofilament heavy polypeptide	Nefh	>sp|P19246|NFH_MOUSE Neurofilament heavy polypeptide OS=Mus musculus (Mouse) OX=10090 GN=Nefh PE=1 SV=3	0.999985	48.1111	0.00218203	70.167	31.506	70.167	0	0		NaN	0	0		NaN	0.999846	38.1119	0.0148404	55.815	0	0		NaN	0	0		NaN	0	0		NaN	0	0		NaN	0	0		NaN	0	0		NaN	0
P19246	679	P19246	P19246	Neurofilament heavy polypeptide	Nefh	>sp|P19246|NFH_MOUSE Neurofilament heavy polypeptide OS=Mus musculus (Mouse) OX=10090 GN=Nefh PE=1 SV=3	1	94.6374	2.02604e-46	158.29	111.25	123.42	1	87.0328	2.39556e-10	115.38	0	0		NaN	1	92.3882	2.75271e-10	114.27	1	113.323	2.02604e-46	158.29	1	94.6374	6.05687e-14	123.42	1	66.4941	2.90723e-05	92.439	1	98.4874	3.55459e-14	126.77	0.999998	57.0218	0.00153725	72.662	1	81.1261	1.17298e-08	109.48	0
P19246	727	P19246	P19246	Neurofilament heavy polypeptide	Nefh	>sp|P19246|NFH_MOUSE Neurofilament heavy polypeptide OS=Mus musculus (Mouse) OX=10090 GN=Nefh PE=1 SV=3	1	108.503	7.12905e-59	166.48	96.204	166.48	1	83.7356	4.05878e-10	114.06	0	0		NaN	1	109.544	1.04609e-19	136.63	1	84.158	3.25608e-11	121.82	1	108.503	7.12905e-59	166.48					1	110.338	1.04609e-19	136.63	0.999992	51.143	0.00945846	59.709	0	0		NaN	0
P19246	739	P19246	P19246	Neurofilament heavy polypeptide	Nefh	>sp|P19246|NFH_MOUSE Neurofilament heavy polypeptide OS=Mus musculus (Mouse) OX=10090 GN=Nefh PE=1 SV=3	1	88.1752	4.48219e-14	109.79	77.091	106.35	0.999822	37.4946	0.011442	46.797					0.999988	49.3975	0.00295495	56.527	0	0		NaN	1	88.1752	5.01601e-14	106.35	0	0		NaN	1	77.5096	1.05524e-08	92.8	0.999981	47.1854	0.00369316	54.402	1	90.1005	4.43512e-11	105.39
P19246	763	P19246	P19246	Neurofilament heavy polypeptide	Nefh	>sp|P19246|NFH_MOUSE Neurofilament heavy polypeptide OS=Mus musculus (Mouse) OX=10090 GN=Nefh PE=1 SV=3	1	66.3286	5.58329e-05	88.427	61.641	84.508	0.999925	41.2723	0.0082971	60.549	0	0		NaN	0.999999	60.7456	5.58329e-05	88.427	1	66.3286	9.74448e-05	84.508	0.999999	60.0052	6.81939e-05	87.138	0.999595	33.9202	0.0424743	50.806	0	0		NaN					0.999981	47.2341	0.00261533	69.331
P19246	589	P19246	P19246	Neurofilament heavy polypeptide	Nefh	>sp|P19246|NFH_MOUSE Neurofilament heavy polypeptide OS=Mus musculus (Mouse) OX=10090 GN=Nefh PE=1 SV=3	0.999994	52.3442	5.47671e-11	121.13	91.188	102.65	0.996803	24.9426	0.00167966	71.98	0	0		NaN	0.999994	52.3442	2.32205e-07	102.65	0.999985	48.1033	1.92698e-08	106.42	0.999981	47.2529	1.83324e-10	117.13	0.997238	25.5879	0.00129906	73.802	0.999986	48.5324	8.19218e-06	95.57	0	0		NaN	0.999823	37.532	4.20217e-05	90.498
P19246	607	P19246	P19246	Neurofilament heavy polypeptide	Nefh	>sp|P19246|NFH_MOUSE Neurofilament heavy polypeptide OS=Mus musculus (Mouse) OX=10090 GN=Nefh PE=1 SV=3	1	114.378	2.06009e-82	171.15	127.02	156	0	0		NaN	0	0		NaN	1	107.69	2.06009e-82	171.15	1	103.248	3.9828e-36	155.26	1	114.378	2.74623e-36	156	0.999998	57.2267	0.000347264	81.656	1	89.0498	1.54099e-42	142.54					1	81.883	1.54099e-42	142.54	0
P19246	703	P19246	P19246	Neurofilament heavy polypeptide	Nefh	>sp|P19246|NFH_MOUSE Neurofilament heavy polypeptide OS=Mus musculus (Mouse) OX=10090 GN=Nefh PE=1 SV=3	1	73.1761	3.63031e-05	91.355	51.726	91.355	0	0		NaN					1	73.1761	3.63031e-05	91.355	0.999983	47.7581	0.00949873	59.68	0.99999	50.2134	0.0106952	58.814	0	0		NaN	0	0		NaN	0	0		NaN	0.999991	50.6082	0.00599431	62.813
P08553	610	P08553	P08553	Neurofilament medium polypeptide	Nefm	>sp|P08553|NFM_MOUSE Neurofilament medium polypeptide OS=Mus musculus (Mouse) OX=10090 GN=Nefm PE=1 SV=4	1	34.4439	8.37035e-07	79.837	68.199	34.444	1	37.7696	0.0251222	37.77	0	0		NaN	0	0		NaN	1	45.2858	0.0077922	45.286	1	79.8366	8.37035e-07	79.837	1	34.4439	0.0491138	34.444	1	61.4953	0.000345992	61.495	1	40.1868	0.0190716	40.187	1	50.3765	0.00393909	50.376
Q9QYX7	1457	Q9QYX7	Q9QYX7	Protein piccolo	Pclo	>sp|Q9QYX7|PCLO_MOUSE Protein piccolo OS=Mus musculus (Mouse) OX=10090 GN=Pclo PE=1 SV=4	0.718056	6.55655	0.00292711	29.492	17.574	29.492	0.482978	2.43236	0.0200063	21.055	0	0		NaN	0.362832	2.4128	0.0192081	21.349	0.718056	6.55655	0.00292711	29.492	0	0		NaN	0	0		NaN	0	0		NaN					0	0		NaN
P35486	293	P35486	P35486	Pyruvate dehydrogenase E1 component subunit alpha, somatic form, mitochondrial	Pdha1	>sp|P35486|ODPA_MOUSE Pyruvate dehydrogenase E1 component subunit alpha, somatic form, mitochondrial OS=Mus musculus (Mouse) OX=10090 GN=Pdha1 PE=1 SV=1	0.96294	14.1856	0.000303095	65.652	59.175	65.652	0.906861	11.0823	0.00758469	49.343					0.957229	13.5655	0.00209095	58.164	0	0		NaN	0.96294	14.1856	0.000303095	65.652	0	0		NaN	0	0		NaN	0	0		NaN	0	0		NaN	0
Q8CI51	268	Q8CI51	Q8CI51	PDZ and LIM domain protein 5	Pdlim5	>sp|Q8CI51|PDLI5_MOUSE PDZ and LIM domain protein 5 OS=Mus musculus (Mouse) OX=10090 GN=Pdlim5 PE=1 SV=4	1	57.5318	0.00999363	57.532	7.444	57.532					0	0		NaN	1	57.5318	0.00999363	57.532	0	0		NaN	0	0		NaN	0	0		NaN
Q62048	116	Q62048	Q62048	Astrocytic phosphoprotein PEA-15	Pea15	>sp|Q62048|PEA15_MOUSE Astrocytic phosphoprotein PEA-15 OS=Mus musculus (Mouse) OX=10090 GN=Pea15 PE=1 SV=1	1	73.2794	0.000106408	73.279	46.016	73.279	1	73.2794	0.000106408	73.279									0	0		NaN					0	0		NaN	0	0		NaN	0	0		NaN	0	0		NaN	0
Q6PD26	9	Q6PD26	Q6PD26	GPI transamidase component PIG-S	Pigs	>sp|Q6PD26|PIGS_MOUSE GPI transamidase component PIG-S OS=Mus musculus (Mouse) OX=10090 GN=Pigs PE=1 SV=3	1	62.0879	0.0171316	62.088	20.004	62.088	1	62.0879	0.0171316	62.088	0	0		NaN	0	0		NaN	0	0		NaN									0	0		NaN
Q80TC5	6	Q80TC5	Q80TC5	Pogo transposable element with KRAB domain	Pogk	>sp|Q80TC5|POGK_MOUSE Pogo transposable element with KRAB domain OS=Mus musculus (Mouse) OX=10090 GN=Pogk PE=2 SV=2	0.979444	16.7805	0.0052806	44.511	14.027	32.295	0.979444	16.7805	0.015278	32.295	0.950198	12.8057	0.0487125	20.124	0.969269	14.9886	0.0052806	33.192	0.966392	14.5871	0.0153816	27.005	0.883582	8.80225	0.030168	27.005	0.974967	15.9047	0.00591188	32.567	0.979444	16.7805	0.0103898	34.05	0.974967	15.9047	0.01452	32.567	0.958901	13.6794	0.030168	27.005	0.951557
P05132;P68181	198;198	P05132;P68181	P05132	cAMP-dependent protein kinase catalytic subunit alpha;cAMP-dependent protein kinase catalytic subunit beta	Prkaca;Prkacb	>sp|P05132|KAPCA_MOUSE cAMP-dependent protein kinase catalytic subunit alpha OS=Mus musculus (Mouse) OX=10090 GN=Prkaca PE=1 SV=3;>sp|P68181|KAPCB_MOUSE cAMP-dependent protein kinase catalytic subunit beta OS=Mus musculus (Mouse) OX=10090 GN=Prkacb PE=1 SV	0.976837	16.2507	1.52048e-41	115.36	110.35	115.36					0	0		NaN	0	0		NaN	0	0		NaN	0.976837	16.2507	1.52048e-41	115.36	0	0		NaN	0.890398	9.09794	6.35172e-09	77.543	0	0		NaN	0	0		NaN
P63318	330	P63318	P63318	Protein kinase C gamma type	Prkcg	>sp|P63318|KPCG_MOUSE Protein kinase C gamma type OS=Mus musculus (Mouse) OX=10090 GN=Prkcg PE=1 SV=1	0.734397	7.58846	1.08161e-05	49.851	44.037	29.645	0.477008	2.48489	0.00104055	34.957	0.492504	3.45504	0.018342	21.667	0.532079	2.58402	0.000348093	40.706	0.597856	3.9122	0.00276604	29.959	0.620888	3.63109	1.08161e-05	49.851	0.430201	3.87695	0.0192081	21.349	0.734397	7.58846	0.00287451	29.645	0.601547	4.33306	0.000434953	39.693	0.546127	3.84838	2.83058e-05	44.474
P63318	655	P63318	P63318	Protein kinase C gamma type	Prkcg	>sp|P63318|KPCG_MOUSE Protein kinase C gamma type OS=Mus musculus (Mouse) OX=10090 GN=Prkcg PE=1 SV=1	1	83.5305	4.81602e-05	83.53	65.327	83.53	0	0		NaN	0	0		NaN					0.676773	3.68402	0.00261412	21.893	0	0		NaN	0.629733	3.83987	0.00337858	20.327					0.681144	3.35866	4.81602e-05	32.09	0	0		NaN
Q2PFD7	1009	Q2PFD7	Q2PFD7	PH and SEC7 domain-containing protein 3	Psd3	>sp|Q2PFD7|PSD3_MOUSE PH and SEC7 domain-containing protein 3 OS=Mus musculus (Mouse) OX=10090 GN=Psd3 PE=1 SV=2	0.989928	20.1803	0.00026413	64.522	57.285	64.522	0	0		NaN	0	0		NaN	0	0		NaN	0.966571	16.3011	0.00890496	46.953	0	0		NaN	0	0		NaN	0	0		NaN	0	0		NaN	0.970282	17.6864	0.0478685	50.858	0
Q99JF8	176	Q99JF8	Q99JF8	PC4 and SFRS1-interacting protein	Psip1	>sp|Q99JF8|PSIP1_MOUSE PC4 and SFRS1-interacting protein OS=Mus musculus (Mouse) OX=10090 GN=Psip1 PE=1 SV=1	0.999076	30.4957	2.23596e-15	70.109	67.465	70.109	0.862217	8.23747	0.000507786	40.849	0.854309	7.72865	8.17585e-06	49.095	0.99707	25.5641	2.03295e-14	66.413	0.999076	30.4957	2.23596e-15	70.109	0.660592	3.65735	0.0100291	28.567	0	0		NaN	0	0		NaN	0.902276	10.0753	0.000905153	37.942	0.824104	7.13636	0.0100291	28.567	0.675066
P46061	138	P46061	P46061	Ran GTPase-activating protein 1	Rangap1	>sp|P46061|RAGP1_MOUSE Ran GTPase-activating protein 1 OS=Mus musculus (Mouse) OX=10090 GN=Rangap1 PE=1 SV=2	0.978163	16.5121	0.0104796	39.338	11.172	39.338	0.978163	16.5121	0.0104796	39.338	0	0		NaN	0	0		NaN									0	0		NaN
Q3UWK8	41	Q3UWK8	Q3UWK8		Serpinb6d	>tr|Q3UWK8|Q3UWK8_MOUSE SERPIN domain-containing protein OS=Mus musculus (Mouse) OX=10090 GN=Serpinb6d PE=2 SV=1	0.548127	0	0.0016514	20.42	7.7418	20.42					0	0		NaN	0	0		NaN
Q3UWK8	36	Q3UWK8	Q3UWK8		Serpinb6d	>tr|Q3UWK8|Q3UWK8_MOUSE SERPIN domain-containing protein OS=Mus musculus (Mouse) OX=10090 GN=Serpinb6d PE=2 SV=1	0.548127	0	0.0016514	20.42	7.7418	20.42					0	0		NaN	0	0		NaN
Q3UWK8	30	Q3UWK8	Q3UWK8		Serpinb6d	>tr|Q3UWK8|Q3UWK8_MOUSE SERPIN domain-containing protein OS=Mus musculus (Mouse) OX=10090 GN=Serpinb6d PE=2 SV=1	0.771055	3.85457	0.0016514	20.42	7.7418	20.42					0	0		NaN	0	0		NaN
Q3UWK8	37	Q3UWK8	Q3UWK8		Serpinb6d	>tr|Q3UWK8|Q3UWK8_MOUSE SERPIN domain-containing protein OS=Mus musculus (Mouse) OX=10090 GN=Serpinb6d PE=2 SV=1	0.548127	0	0.0016514	20.42	7.7418	20.42					0	0		NaN	0	0		NaN
Q3UWK8	33	Q3UWK8	Q3UWK8		Serpinb6d	>tr|Q3UWK8|Q3UWK8_MOUSE SERPIN domain-containing protein OS=Mus musculus (Mouse) OX=10090 GN=Serpinb6d PE=2 SV=1	0.548242	0	0.0016514	20.42	7.7418	20.42					0	0		NaN	0	0		NaN
D3YZU1	413	D3YZU1	D3YZU1	SH3 and multiple ankyrin repeat domains protein 1	Shank1	>sp|D3YZU1|SHAN1_MOUSE SH3 and multiple ankyrin repeat domains protein 1 OS=Mus musculus (Mouse) OX=10090 GN=Shank1 PE=1 SV=1	0.999624	34.2472	0.00189018	49.768	36.668	49.768	0	0		NaN	0	0		NaN	0.999095	30.432	0.00217258	48.968	0	0		NaN	0	0		NaN	0	0		NaN	0.999624	34.2472	0.00189018	49.768	0	0		NaN	0	0		NaN	0
Q8C3Q5	532	Q8C3Q5	Q8C3Q5	Protein shisa-7	Shisa7	>sp|Q8C3Q5|SHSA7_MOUSE Protein shisa-7 OS=Mus musculus (Mouse) OX=10090 GN=Shisa7 PE=1 SV=3	1	33.4004	0.000856437	33.4	23.402	33.4	0	0		NaN	0	0		NaN	1	33.4004	0.000856437	33.4	0	0		NaN					0	0		NaN	0	0		NaN	0	0		NaN	0	0		NaN
Q7TMX5	358	Q7TMX5	Q7TMX5	Protein SHQ1 homolog	Shq1	>sp|Q7TMX5|SHQ1_MOUSE Protein SHQ1 homolog OS=Mus musculus (Mouse) OX=10090 GN=Shq1 PE=1 SV=2	1	50.0878	0.00521294	50.088	33.558	50.088	1	40.9413	0.0153319	40.941	1	40.9413	0.0153319	40.941	1	35.6568	0.0257972	35.657	0	0		NaN	0	0		NaN	1	28.1457	0.00650878	28.146	1	33.8417	0.0326939	33.842	1	35.6568	0.0257972	35.657	1	42.3169	0.0127785	42.317	0
Q7TMX5	349	Q7TMX5	Q7TMX5	Protein SHQ1 homolog	Shq1	>sp|Q7TMX5|SHQ1_MOUSE Protein SHQ1 homolog OS=Mus musculus (Mouse) OX=10090 GN=Shq1 PE=1 SV=2	1	50.0878	0.00521294	50.088	33.558	50.088	1	40.9413	0.0153319	40.941	1	40.9413	0.0153319	40.941	1	35.6568	0.0257972	35.657	0	0		NaN	0	0		NaN	1	28.1457	0.00650878	28.146	1	33.8417	0.0326939	33.842	1	35.6568	0.0257972	35.657	1	42.3169	0.0127785	42.317	0
Q9QXN0	1786	Q9QXN0	Q9QXN0	Protein Shroom3	Shroom3	>sp|Q9QXN0|SHRM3_MOUSE Protein Shroom3 OS=Mus musculus (Mouse) OX=10090 GN=Shroom3 PE=1 SV=2	0.999868	38.7833	0.00307374	50.178	23.407	50.178	0.999868	38.7833	0.00307374	50.178	0	0		NaN	0	0		NaN	0.998606	28.5438	0.047188	35.304	0	0		NaN					0	0		NaN	0	0		NaN
Q9QXN0	1781	Q9QXN0	Q9QXN0	Protein Shroom3	Shroom3	>sp|Q9QXN0|SHRM3_MOUSE Protein Shroom3 OS=Mus musculus (Mouse) OX=10090 GN=Shroom3 PE=1 SV=2	0.99989	39.5867	0.00307374	50.178	23.407	50.178	0.99989	39.5867	0.00307374	50.178	0	0		NaN	0	0		NaN	0.998606	28.5438	0.047188	35.304	0	0		NaN					0	0		NaN	0	0		NaN
Q6P5D8	584	Q6P5D8	Q6P5D8	Structural maintenance of chromosomes flexible hinge domain-containing protein 1	Smchd1	>sp|Q6P5D8|SMHD1_MOUSE Structural maintenance of chromosomes flexible hinge domain-containing protein 1 OS=Mus musculus (Mouse) OX=10090 GN=Smchd1 PE=1 SV=2	1	21.5695	0.018072	30.392	8.0636	21.569	0	0		NaN													0	0		NaN	1	21.5695	0.0733125	21.569	0	0		NaN	1	30.3922	0.018072	30.392	0	0		NaN	0
Q6P5D8	590	Q6P5D8	Q6P5D8	Structural maintenance of chromosomes flexible hinge domain-containing protein 1	Smchd1	>sp|Q6P5D8|SMHD1_MOUSE Structural maintenance of chromosomes flexible hinge domain-containing protein 1 OS=Mus musculus (Mouse) OX=10090 GN=Smchd1 PE=1 SV=2	1	21.5695	0.018072	30.392	8.0636	21.569	0	0		NaN													0	0		NaN	1	21.5695	0.0733125	21.569	0	0		NaN	1	30.3922	0.018072	30.392	0	0		NaN	0
Q62261	2102	Q62261	Q62261	Spectrin beta chain, non-erythrocytic 1	Sptbn1	>sp|Q62261|SPTB2_MOUSE Spectrin beta chain, non-erythrocytic 1 OS=Mus musculus (Mouse) OX=10090 GN=Sptbn1 PE=1 SV=2	1	67.4153	0.00182949	110.25	56.579	105.03	0.99999	49.8197	0.0437885	72.705	0.999987	48.7547	0.0456079	71.933	1	67.4153	0.0311618	105.03	0.999999	58.4223	0.0149761	110.25	0.999999	61.5252	0.0297423	105.95	1	66.1537	0.0233651	98.592	0.999999	62.3568	0.0320765	85.536	0.999405	32.2528	0.0108328	44.829	1	65.9334	0.0128776	99.161	0.999992
Q9QWI6	1054	Q9QWI6	Q9QWI6	SRC kinase signaling inhibitor 1	Srcin1	>sp|Q9QWI6|SRCN1_MOUSE SRC kinase signaling inhibitor 1 OS=Mus musculus (Mouse) OX=10090 GN=Srcin1 PE=1 SV=2	0.999973	45.7591	0.0220904	95.981	73.096	95.981	0	0		NaN	0	0		NaN	0	0		NaN	0	0		NaN	0	0		NaN	0.999973	45.6707	0.0285114	79.639	0.999973	45.7591	0.0220904	95.981	0	0		NaN	0	0		NaN	0
Q9QWI6	293	Q9QWI6	Q9QWI6	SRC kinase signaling inhibitor 1	Srcin1	>sp|Q9QWI6|SRCN1_MOUSE SRC kinase signaling inhibitor 1 OS=Mus musculus (Mouse) OX=10090 GN=Srcin1 PE=1 SV=2	0.806214	8.61762	0.00053529	43.696	40.263	37.4	0	0		NaN					0	0		NaN	0.710076	4.91524	0.00950694	33.248					0	0		NaN	0.594256	4.50155	0.0264108	26.742	0.806214	8.61762	0.0036819	37.4	0.682853	4.50155	0.0264108	26.742	0
Q9QWI6	411	Q9QWI6	Q9QWI6	SRC kinase signaling inhibitor 1	Srcin1	>sp|Q9QWI6|SRCN1_MOUSE SRC kinase signaling inhibitor 1 OS=Mus musculus (Mouse) OX=10090 GN=Srcin1 PE=1 SV=2	0.557248	3.62814	0.00186629	31.314	27.675	26.6	0.557248	3.62814	0.00322595	26.6	0	0		NaN	0.542659	3.54509	0.00186629	29.675	0.431947	0.445313	0.008159	31.314	0	0		NaN	0.250219	0	0.0120995	21.242	0	0		NaN	0	0		NaN	0	0		NaN	0
Q9QWI6	933	Q9QWI6	Q9QWI6	SRC kinase signaling inhibitor 1	Srcin1	>sp|Q9QWI6|SRCN1_MOUSE SRC kinase signaling inhibitor 1 OS=Mus musculus (Mouse) OX=10090 GN=Srcin1 PE=1 SV=2	0.999939	42.6126	1.39481e-44	88.394	71.682	78.913	0	0		NaN	0	0		NaN	0.99416	23.3367	0.000414201	42.341	0.999622	34.3063	1.39481e-44	88.394	0	0		NaN	0.999939	42.6126	4.26492e-25	78.913									0.986834	19.4331	5.95244e-06	45.308	0
P52633	285	P52633	P52633	Signal transducer and transcription activator 6	Stat6	>sp|P52633|STAT6_MOUSE Signal transducer and transcription activator 6 OS=Mus musculus (Mouse) OX=10090 GN=Stat6 PE=1 SV=2	1	24.4806	0.00784697	24.481	14.568	24.481	0	0		NaN	0	0		NaN	0	0		NaN	0	0		NaN	0	0		NaN	0	0		NaN	0	0		NaN	1	24.4806	0.00784697	24.481	0	0		NaN	0
P52633	287	P52633	P52633	Signal transducer and transcription activator 6	Stat6	>sp|P52633|STAT6_MOUSE Signal transducer and transcription activator 6 OS=Mus musculus (Mouse) OX=10090 GN=Stat6 PE=1 SV=2	1	24.4806	0.00784697	24.481	14.568	24.481	0	0		NaN	0	0		NaN	0	0		NaN	0	0		NaN	0	0		NaN	0	0		NaN	0	0		NaN	1	24.4806	0.00784697	24.481	0	0		NaN	0
O08599	594	O08599	O08599	Syntaxin-binding protein 1	Stxbp1	>sp|O08599|STXB1_MOUSE Syntaxin-binding protein 1 OS=Mus musculus (Mouse) OX=10090 GN=Stxbp1 PE=1 SV=2	0.846677	7.42117	0.00134714	90.689	77.597	69.456	0.499998	0	0.0102701	62.035	0	0		NaN	0.846677	7.42117	0.00515297	69.456	0.5	0	0.0026714	77.192	0.5	0	0.00134714	90.689	0.499996	0	0.011159	61.409	0.5	0	0.00186269	88.224	0.499955	0	0.0120748	51.643	0.49999	0	0.011159	61.409
O08599	593	O08599	O08599	Syntaxin-binding protein 1	Stxbp1	>sp|O08599|STXB1_MOUSE Syntaxin-binding protein 1 OS=Mus musculus (Mouse) OX=10090 GN=Stxbp1 PE=1 SV=2	0.5	0	0.00134714	90.689	77.597	88.224	0.499998	0	0.0102701	62.035	0	0		NaN					0.5	0	0.0026714	77.192	0.5	0	0.00134714	90.689	0.499996	0	0.011159	61.409	0.5	0	0.00186269	88.224	0.499955	0	0.0120748	51.643	0.49999	0	0.011159	61.409
Q8CCT4;Q8R0A5;Q9DB24	120;120;120	Q8CCT4;Q8R0A5	Q8CCT4	Transcription elongation factor A protein-like 5;Transcription elongation factor A protein-like 3	Tceal5;Tceal3;Tceal6	>sp|Q8CCT4|TCAL5_MOUSE Transcription elongation factor A protein-like 5 OS=Mus musculus (Mouse) OX=10090 GN=Tceal5 PE=1 SV=1;>sp|Q8R0A5|TCAL3_MOUSE Transcription elongation factor A protein-like 3 OS=Mus musculus (Mouse) OX=10090 GN=Tceal3 PE=1 SV=2;>tr|Q9	0.9188	13.2606	0.000377881	57.288	49.756	51.03	0.9188	13.2606	0.00144476	51.03	0	0		NaN	0	0		NaN									0	0		NaN	0	0		NaN	0.785243	6.25817	0.000377881	57.288	0	0		NaN
Q569Z6	248	Q569Z6	Q569Z6	Thyroid hormone receptor-associated protein 3	Thrap3	>sp|Q569Z6|TR150_MOUSE Thyroid hormone receptor-associated protein 3 OS=Mus musculus (Mouse) OX=10090 GN=Thrap3 PE=1 SV=1	0.999998	56.3569	3.70848e-12	85.456	76.659	85.456	0.999938	42.226	1.9119e-05	64.422	0.998068	27.2372	0.00344759	46.099	0.999105	30.6856	0.00146791	45.707	0.999763	36.4026	0.000572121	55.337	0	0		NaN	0.998605	28.7171	0.00306955	47.089	0.998621	28.8976	0.00505138	43.164	0.99998	46.9992	1.63125e-06	70.072	0.999922	41.1235	7.75488e-08	72.801	0
Q3TWF6	590	Q3TWF6	Q3TWF6	WD repeat-containing protein 70	Wdr70	>sp|Q3TWF6|WDR70_MOUSE WD repeat-containing protein 70 OS=Mus musculus (Mouse) OX=10090 GN=Wdr70 PE=1 SV=1	0.822005	4.86603	0.00469343	26.112	10.567	26.112	0	0		NaN	0	0		NaN	0	0		NaN					0	0		NaN	0	0		NaN	0	0		NaN	0	0		NaN	0.822005	4.86603	0.00469343	26.112
Q3TWF6	589	Q3TWF6	Q3TWF6	WD repeat-containing protein 70	Wdr70	>sp|Q3TWF6|WDR70_MOUSE WD repeat-containing protein 70 OS=Mus musculus (Mouse) OX=10090 GN=Wdr70 PE=1 SV=1	0.840896	5.37867	0.00469343	26.112	10.567	26.112	0	0		NaN	0	0		NaN	0	0		NaN					0	0		NaN	0	0		NaN	0	0		NaN	0	0		NaN	0.840896	5.37867	0.00469343	26.112
Q3TWF6	588	Q3TWF6	Q3TWF6	WD repeat-containing protein 70	Wdr70	>sp|Q3TWF6|WDR70_MOUSE WD repeat-containing protein 70 OS=Mus musculus (Mouse) OX=10090 GN=Wdr70 PE=1 SV=1	0.840896	5.37867	0.00469343	26.112	10.567	26.112	0	0		NaN	0	0		NaN	0	0		NaN					0	0		NaN	0	0		NaN	0	0		NaN	0	0		NaN	0.840896	5.37867	0.00469343	26.112
Q3UVF6;E9Q2S6	550;604	Q3UVF6	Q3UVF6		1700049G17Rik;Zfp780b	>tr|Q3UVF6|Q3UVF6_MOUSE Zinc finger protein 974 OS=Mus musculus (Mouse) OX=10090 GN=Zfp974 PE=2 SV=1;>tr|E9Q2S6|E9Q2S6_MOUSE Zinc finger protein 780B OS=Mus musculus (Mouse) OX=10090 GN=Zfp780b PE=1 SV=1	0.999924	45.821	0.012155	51.03	37.626	51.03	0	0		NaN	0	0		NaN					0	0		NaN	0	0		NaN	0	0		NaN	0	0		NaN	0	0		NaN	0	0		NaN	0.998783
Q08EE8	337	Q08EE8	Q08EE8		1700061G19Rik	>tr|Q08EE8|Q08EE8_MOUSE AMP-binding domain-containing protein OS=Mus musculus (Mouse) OX=10090 GN=Acsbg3 PE=1 SV=1	0.5	0	0.00194201	38.783	11.996	38.783
Q08EE8	334	Q08EE8	Q08EE8		1700061G19Rik	>tr|Q08EE8|Q08EE8_MOUSE AMP-binding domain-containing protein OS=Mus musculus (Mouse) OX=10090 GN=Acsbg3 PE=1 SV=1	0.5	0	0.00194201	38.783	11.996	38.783
E9Q3M9	961	E9Q3M9	E9Q3M9		2010300C02Rik	>tr|E9Q3M9|E9Q3M9_MOUSE DUF4592 domain-containing protein OS=Mus musculus (Mouse) OX=10090 GN=2010300C02Rik PE=1 SV=1	0.497155	0	0.0101687	32.702	23.34	31.614	0.497155	0	0.0119016	31.614	0	0		NaN	0	0		NaN	0.470642	0	0.0307382	26.292																	0.492973	0	0.0101687	32.702
E9Q3M9	184	E9Q3M9	E9Q3M9		2010300C02Rik	>tr|E9Q3M9|E9Q3M9_MOUSE DUF4592 domain-containing protein OS=Mus musculus (Mouse) OX=10090 GN=2010300C02Rik PE=1 SV=1	0.261629	0	0.000579735	41.908	38.197	41.908	0.261629	0	0.000579735	41.908	0	0		NaN					0.258575	0	0.00751351	31.771					0	0		NaN	0	0		NaN	0	0		NaN					0
E9Q3M9	185	E9Q3M9	E9Q3M9		2010300C02Rik	>tr|E9Q3M9|E9Q3M9_MOUSE DUF4592 domain-containing protein OS=Mus musculus (Mouse) OX=10090 GN=2010300C02Rik PE=1 SV=1	0.261629	0	0.000579735	41.908	38.197	41.908	0.261629	0	0.000579735	41.908	0	0		NaN					0.258575	0	0.00751351	31.771					0	0		NaN	0	0		NaN	0	0		NaN					0
E9Q3M9	189	E9Q3M9	E9Q3M9		2010300C02Rik	>tr|E9Q3M9|E9Q3M9_MOUSE DUF4592 domain-containing protein OS=Mus musculus (Mouse) OX=10090 GN=2010300C02Rik PE=1 SV=1	0.468806	4.28802	0.0032586	34.78	30.908	31.054					0	0		NaN	0.436205	3.72665	0.0032586	34.78									0	0		NaN	0	0		NaN	0	0		NaN	0.468806	4.28802	0.00852711	31.054	0
E9Q3M9	183	E9Q3M9	E9Q3M9		2010300C02Rik	>tr|E9Q3M9|E9Q3M9_MOUSE DUF4592 domain-containing protein OS=Mus musculus (Mouse) OX=10090 GN=2010300C02Rik PE=1 SV=1	0.261629	0	0.000579735	41.908	38.197	41.908	0.261629	0	0.000579735	41.908	0	0		NaN					0.258575	0	0.00751351	31.771					0	0		NaN	0	0		NaN	0	0		NaN					0
E9Q3M9	507	E9Q3M9	E9Q3M9		2010300C02Rik	>tr|E9Q3M9|E9Q3M9_MOUSE DUF4592 domain-containing protein OS=Mus musculus (Mouse) OX=10090 GN=2010300C02Rik PE=1 SV=1	1	29.4924	0.00621047	34.041	27.605	29.492	0	0		NaN	0	0		NaN	1	30.5967	0.0122843	30.597	1	29.4924	0.0142316	29.492	0	0		NaN	0	0		NaN	1	34.0411	0.00621047	34.041	1	23.6578	0.0614349	23.658	1	28.3327	0.0162766	28.333	0
Q9CR05	11	Q9CR05	Q9CR05		4931417E11Rik	>tr|Q9CR05|Q9CR05_MOUSE RIKEN cDNA 4931417E11 gene OS=Mus musculus (Mouse) OX=10090 GN=4931417E11Rik PE=2 SV=1	0.525698	0.446812	0.0150736	20.124	10.212	20.124																					0	0		NaN									0.525698	0.446812	0.0150736	20.124
E9PX95;Q8R420	672;683	E9PX95;Q8R420	E9PX95	ATP-binding cassette sub-family A member 3	Abca17;Abca3	>sp|E9PX95|ABCAH_MOUSE ATP-binding cassette sub-family A member 17 OS=Mus musculus (Mouse) OX=10090 GN=Abca17 PE=1 SV=1;>sp|Q8R420|ABCA3_MOUSE ATP-binding cassette sub-family A member 3 OS=Mus musculus (Mouse) OX=10090 GN=Abca3 PE=1 SV=3	0.999954	43.4075	0.00512296	44.543	12.946	44.543	0	0		NaN					0.999706	35.3114	0.0228826	36.447	0	0		NaN									0	0		NaN					0	0		NaN
Q9QYC0	11	Q9QYC0	Q9QYC0	Alpha-adducin	Add1	>sp|Q9QYC0|ADDA_MOUSE Alpha-adducin OS=Mus musculus (Mouse) OX=10090 GN=Add1 PE=1 SV=2	0.499873	0	0.00116009	58.246	55.166	50.831	0.499873	0	0.00809804	50.831	0.499713	0	0.012596	48.899	0.499417	0	0.00116009	58.246	0.496225	0	0.0679302	37.157	0	0		NaN	0	0		NaN	0	0		NaN	0	0		NaN					0.49979
Q9QYC0	12	Q9QYC0	Q9QYC0	Alpha-adducin	Add1	>sp|Q9QYC0|ADDA_MOUSE Alpha-adducin OS=Mus musculus (Mouse) OX=10090 GN=Add1 PE=1 SV=2	0.822635	6.69434	0.000159325	58.246	55.166	57.525	0.499873	0	0.00809804	50.831	0.499713	0	0.012596	48.899	0.499417	0	0.00116009	58.246	0.496225	0	0.0679302	37.157	0	0		NaN	0	0		NaN	0	0		NaN	0.822635	6.69434	0.000159325	57.525	0.811552	6.38396	0.0011111	50.178	0.49979
A2ALV5	747	A2ALV5	A2ALV5		AI481877	>sp|A2ALV5|SHOC1_MOUSE Protein shortage in chiasmata 1 ortholog OS=Mus musculus (Mouse) OX=10090 GN=Shoc1 PE=2 SV=1	0.999656	34.6303	0.00467307	46.001	28.79	46.001																	0.999656	34.6303	0.00467307	46.001
A2ALV5	749	A2ALV5	A2ALV5		AI481877	>sp|A2ALV5|SHOC1_MOUSE Protein shortage in chiasmata 1 ortholog OS=Mus musculus (Mouse) OX=10090 GN=Shoc1 PE=2 SV=1	0.999562	33.5813	0.00467307	46.001	28.79	46.001																	0.999562	33.5813	0.00467307	46.001
Q9WUA6	193	Q9WUA6	Q9WUA6	RAC-gamma serine/threonine-protein kinase	Akt3	>sp|Q9WUA6|AKT3_MOUSE RAC-gamma serine/threonine-protein kinase OS=Mus musculus (Mouse) OX=10090 GN=Akt3 PE=1 SV=1	0.987324	20.4477	0.0218714	33.872	17.699	33.872																																					0.939083
Q7TQF7	262	Q7TQF7	Q7TQF7	Amphiphysin	Amph	>sp|Q7TQF7|AMPH_MOUSE Amphiphysin OS=Mus musculus (Mouse) OX=10090 GN=Amph PE=1 SV=1	0.495078	0	0.0008572	32.003	29.504	32.003					0.495078	0	0.0008572	32.003									0	0		NaN
Q7TQF7	260	Q7TQF7	Q7TQF7	Amphiphysin	Amph	>sp|Q7TQF7|AMPH_MOUSE Amphiphysin OS=Mus musculus (Mouse) OX=10090 GN=Amph PE=1 SV=1	0.495078	0	0.0008572	32.003	29.504	32.003					0.495078	0	0.0008572	32.003									0	0		NaN
Q6ZPS6	6	Q6ZPS6	Q6ZPS6	Ankyrin repeat and IBR domain-containing protein 1	Ankib1	>sp|Q6ZPS6|AKIB1_MOUSE Ankyrin repeat and IBR domain-containing protein 1 OS=Mus musculus (Mouse) OX=10090 GN=Ankib1 PE=1 SV=2	0.333333	0	0.00265135	47.187	27.546	45.368	0.333333	0	0.00310122	45.368	0.333333	0	0.00960315	36.424					0.333333	0	0.00960315	36.424	0.333333	0	0.00310122	45.368					0.333333	0	0.00310122	45.368
Q6ZPS6	4	Q6ZPS6	Q6ZPS6	Ankyrin repeat and IBR domain-containing protein 1	Ankib1	>sp|Q6ZPS6|AKIB1_MOUSE Ankyrin repeat and IBR domain-containing protein 1 OS=Mus musculus (Mouse) OX=10090 GN=Ankib1 PE=1 SV=2	0.333333	0	0.00265135	47.187	27.546	45.368	0.333333	0	0.00310122	45.368	0.333333	0	0.00960315	36.424					0.333333	0	0.00960315	36.424	0.333333	0	0.00310122	45.368					0.333333	0	0.00310122	45.368
Q6ZPS6	5	Q6ZPS6	Q6ZPS6	Ankyrin repeat and IBR domain-containing protein 1	Ankib1	>sp|Q6ZPS6|AKIB1_MOUSE Ankyrin repeat and IBR domain-containing protein 1 OS=Mus musculus (Mouse) OX=10090 GN=Ankib1 PE=1 SV=2	0.333333	0	0.00265135	47.187	27.546	45.368	0.333333	0	0.00310122	45.368	0.333333	0	0.00960315	36.424					0.333333	0	0.00960315	36.424	0.333333	0	0.00310122	45.368					0.333333	0	0.00310122	45.368
J3QNN4	10	J3QNN4	J3QNN4		Ankrd66	>tr|J3QNN4|J3QNN4_MOUSE ANK_REP_REGION domain-containing protein OS=Mus musculus (Mouse) OX=10090 GN=Ankrd66 PE=4 SV=1	0.948513	12.6534	0.0181217	28.283	7.2839	28.283	0	0		NaN	0	0		NaN	0	0		NaN	0	0		NaN	0	0		NaN	0	0		NaN	0	0		NaN	0	0		NaN	0	0		NaN	0
Q4LDD4	1205	Q4LDD4	Q4LDD4	Arf-GAP with Rho-GAP domain, ANK repeat and PH domain-containing protein 1	Arap1	>sp|Q4LDD4|ARAP1_MOUSE Arf-GAP with Rho-GAP domain, ANK repeat and PH domain-containing protein 1 OS=Mus musculus (Mouse) OX=10090 GN=Arap1 PE=1 SV=2	0.990574	23.2257	0.0163402	23.635	9.7811	23.635					0	0		NaN
P59999	54	P59999	P59999	Actin-related protein 2/3 complex subunit 4	Arpc4	>sp|P59999|ARPC4_MOUSE Actin-related protein 2/3 complex subunit 4 OS=Mus musculus (Mouse) OX=10090 GN=Arpc4 PE=1 SV=3	0.500308	0	0.00136355	37.248	21.704	37.248																					0.500308	0	0.00136355	37.248
P59999	42	P59999	P59999	Actin-related protein 2/3 complex subunit 4	Arpc4	>sp|P59999|ARPC4_MOUSE Actin-related protein 2/3 complex subunit 4 OS=Mus musculus (Mouse) OX=10090 GN=Arpc4 PE=1 SV=3	0.999688	32.0392	0.00136355	37.248	21.704	37.248																					0.999688	32.0392	0.00136355	37.248
P59999	43	P59999	P59999	Actin-related protein 2/3 complex subunit 4	Arpc4	>sp|P59999|ARPC4_MOUSE Actin-related protein 2/3 complex subunit 4 OS=Mus musculus (Mouse) OX=10090 GN=Arpc4 PE=1 SV=3	0.999697	32.1792	0.00136355	37.248	21.704	37.248																					0.999697	32.1792	0.00136355	37.248
P59999	52	P59999	P59999	Actin-related protein 2/3 complex subunit 4	Arpc4	>sp|P59999|ARPC4_MOUSE Actin-related protein 2/3 complex subunit 4 OS=Mus musculus (Mouse) OX=10090 GN=Arpc4 PE=1 SV=3	0.500308	0	0.00136355	37.248	21.704	37.248																					0.500308	0	0.00136355	37.248
P34927	106	P34927	P34927	Asialoglycoprotein receptor 1	Asgr1	>sp|P34927|ASGR1_MOUSE Asialoglycoprotein receptor 1 OS=Mus musculus (Mouse) OX=10090 GN=Asgr1 PE=1 SV=4	1	35.5414	0.0118838	35.541	6.8333	35.541	1	32.7305	0.0206089	32.731					1	32.218	0.0221997	32.218					0	0		NaN	0	0		NaN	0	0		NaN									0
Q6NXK8	387	Q6NXK8	Q6NXK8	Acid-sensing ion channel 1	Asic1	>sp|Q6NXK8|ASIC1_MOUSE Acid-sensing ion channel 1 OS=Mus musculus (Mouse) OX=10090 GN=Asic1 PE=1 SV=1	1	46.4258	0.0142946	46.426	8.4576	46.426					1	46.4258	0.0142946	46.426
Q80ZF8	1411	Q80ZF8	Q80ZF8	Brain-specific angiogenesis inhibitor 3	Bai3	>sp|Q80ZF8|AGRB3_MOUSE Adhesion G protein-coupled receptor B3 OS=Mus musculus (Mouse) OX=10090 GN=Adgrb3 PE=1 SV=2	0.498293	0	1.58848e-08	90.385	79.771	71.376	0.48015	0	3.65721e-07	81.157	0	0		NaN	0	0		NaN	0	0		NaN	0	0		NaN	0	0		NaN	0.496137	0	0.0053714	67.645	0.48265	0	1.58848e-08	90.385	0.498293	0	0.000151535	71.376
Q80ZF8	1410	Q80ZF8	Q80ZF8	Brain-specific angiogenesis inhibitor 3	Bai3	>sp|Q80ZF8|AGRB3_MOUSE Adhesion G protein-coupled receptor B3 OS=Mus musculus (Mouse) OX=10090 GN=Adgrb3 PE=1 SV=2	0.498293	0	1.58848e-08	90.385	79.771	71.376	0.48015	0	3.65721e-07	81.157	0	0		NaN	0	0		NaN	0	0		NaN	0	0		NaN	0	0		NaN	0.496137	0	0.0053714	67.645	0.48265	0	1.58848e-08	90.385	0.498293	0	0.000151535	71.376
Q91XV3	31	Q91XV3	Q91XV3	Brain acid soluble protein 1	Basp1	>sp|Q91XV3|BASP1_MOUSE Brain acid soluble protein 1 OS=Mus musculus (Mouse) OX=10090 GN=Basp1 PE=1 SV=3	0.883138	8.84607	9.07299e-44	93.568	90.597	65.298					0	0		NaN					0.784745	5.62005	9.07299e-44	93.568	0.48793	0	0.00064193	38.588	0	0		NaN					0.883138	8.84607	6.61356e-16	65.298	0.500663	0.441598	4.13174e-06	45.042	0
Q08ED0	2	Q08ED0	Q08ED0	Bcl-2-like protein 15	Bcl2l15	>sp|Q08ED0|B2L15_MOUSE Bcl-2-like protein 15 OS=Mus musculus (Mouse) OX=10090 GN=Bcl2l15 PE=2 SV=2	1	43.0002	0.0167696	43	10.68	43																																					1
Q8K019	494	Q8K019	Q8K019	Bcl-2-associated transcription factor 1	Bclaf1	>sp|Q8K019|BCLF1_MOUSE Bcl-2-associated transcription factor 1 OS=Mus musculus (Mouse) OX=10090 GN=Bclaf1 PE=1 SV=2	0.999204	30.9869	0.0227347	38.723	18.294	38.723													0	0		NaN									0	0		NaN
Q8K019	267	Q8K019	Q8K019	Bcl-2-associated transcription factor 1	Bclaf1	>sp|Q8K019|BCLF1_MOUSE Bcl-2-associated transcription factor 1 OS=Mus musculus (Mouse) OX=10090 GN=Bclaf1 PE=1 SV=2	0.999564	33.6896	9.81687e-06	68.639	61.128	67.396	0.989001	24.8366	0.00489594	45.237	0	0		NaN	0.999564	33.6896	1.60417e-05	67.396	0.975146	17.5558	0.00603945	31.917	0	0		NaN					0.997266	27.1204	0.000301085	48.968									0
O88737	1476	O88737	O88737	Protein bassoon	Bsn	>sp|O88737|BSN_MOUSE Protein bassoon OS=Mus musculus (Mouse) OX=10090 GN=Bsn PE=1 SV=4	0.174164	0.828215	0.00766573	27.09	23.47	22.951	0	0		NaN	0	0		NaN	0	0		NaN	0.155474	0.324587	0.00766573	27.09	0	0		NaN	0	0		NaN	0.174164	0.828215	0.0509622	22.951	0	0		NaN	0	0		NaN
Q8C4L8	175	Q8C4L8	Q8C4L8		C130073F10Rik	>tr|Q8C4L8|Q8C4L8_MOUSE RIKEN cDNA C130073F10 gene OS=Mus musculus (Mouse) OX=10090 GN=C130073F10Rik PE=2 SV=1	0.496944	0	0.00799314	22.991	11.073	22.991									0.495098	0	0.00799314	22.991	0	0		NaN					0	0		NaN									0.496944	0	0.00799314	22.991
Q8C4L8	173	Q8C4L8	Q8C4L8		C130073F10Rik	>tr|Q8C4L8|Q8C4L8_MOUSE RIKEN cDNA C130073F10 gene OS=Mus musculus (Mouse) OX=10090 GN=C130073F10Rik PE=2 SV=1	0.496944	0	0.00799314	22.991	11.073	22.991									0.495098	0	0.00799314	22.991	0	0		NaN					0	0		NaN									0.496944	0	0.00799314	22.991
Q61290	1909	Q61290	Q61290	Voltage-dependent R-type calcium channel subunit alpha-1E	Cacna1e	>sp|Q61290|CAC1E_MOUSE Voltage-dependent R-type calcium channel subunit alpha-1E OS=Mus musculus (Mouse) OX=10090 GN=Cacna1e PE=1 SV=1	0.5	0	0.00325214	35.037	18.264	28.283	0	0		NaN	0.5	0	0.0510817	22.365	0	0		NaN	0	0		NaN	0	0		NaN	0	0		NaN					0.5	0	0.0108369	28.283					0
Q61290	1908	Q61290	Q61290	Voltage-dependent R-type calcium channel subunit alpha-1E	Cacna1e	>sp|Q61290|CAC1E_MOUSE Voltage-dependent R-type calcium channel subunit alpha-1E OS=Mus musculus (Mouse) OX=10090 GN=Cacna1e PE=1 SV=1	0.5	0	0.00325214	35.037	18.264	28.283	0	0		NaN	0.5	0	0.0510817	22.365	0	0		NaN	0	0		NaN	0	0		NaN	0	0		NaN					0.5	0	0.0108369	28.283					0
E9QA15	200	E9QA15	E9QA15		Cald1	>tr|E9QA15|E9QA15_MOUSE Caldesmon 1 OS=Mus musculus (Mouse) OX=10090 GN=Cald1 PE=1 SV=1	1	22.4346	0.0157635	22.435	11.82	22.435	0	0		NaN									0	0		NaN	0	0		NaN					1	22.4346	0.0157635	22.435
P0DP28;P0DP27;P0DP26	6;6;6	P0DP28	P0DP28		Calm3	>sp|P0DP28|CALM3_MOUSE Calmodulin-3 OS=Mus musculus (Mouse) OX=10090 GN=Calm3 PE=1 SV=1;>sp|P0DP27|CALM2_MOUSE Calmodulin-2 OS=Mus musculus (Mouse) OX=10090 GN=Calm2 PE=1 SV=1;>sp|P0DP26|CALM1_MOUSE Calmodulin-1 OS=Mus musculus (Mouse) OX=10090 GN=Calm1 PE	0.689996	3.64726	0.0170379	22.647	21.5	22.647					0	0		NaN	0	0		NaN	0	0		NaN													0	0		NaN
P11798	330	P11798	P11798	Calcium/calmodulin-dependent protein kinase type II subunit alpha	Camk2a	>sp|P11798|KCC2A_MOUSE Calcium/calmodulin-dependent protein kinase type II subunit alpha OS=Mus musculus (Mouse) OX=10090 GN=Camk2a PE=1 SV=2	0.47469	0	1.73456e-28	87.091	81.964	87.091	0.387822	0	3.31774e-09	57.238	0.185162	0	0.0502917	22.886	0.369566	0	3.31774e-09	57.238	0.224822	0	0.00112853	36.935	0	0		NaN	0	0		NaN	0.47469	0	1.73456e-28	87.091	0.311364	0	0.000495791	53.359	0.221032	0	0.0144355	26.849	0
P11798	331	P11798	P11798	Calcium/calmodulin-dependent protein kinase type II subunit alpha	Camk2a	>sp|P11798|KCC2A_MOUSE Calcium/calmodulin-dependent protein kinase type II subunit alpha OS=Mus musculus (Mouse) OX=10090 GN=Camk2a PE=1 SV=2	0.706486	8.08601	1.73456e-28	87.091	81.964	68.411	0.387822	0	3.31774e-09	57.238	0.284422	2.1146	0.0010843	47.499	0.369566	0	3.31774e-09	57.238	0.252355	1.65774	5.91618e-09	69.986	0.427285	5.43417	0.0289263	28.868	0	0		NaN	0.47469	0	1.73456e-28	87.091	0.311364	0	1.79551e-05	58.712	0.706486	8.08601	2.19622e-08	68.411	0
P11798	333	P11798	P11798	Calcium/calmodulin-dependent protein kinase type II subunit alpha	Camk2a	>sp|P11798|KCC2A_MOUSE Calcium/calmodulin-dependent protein kinase type II subunit alpha OS=Mus musculus (Mouse) OX=10090 GN=Camk2a PE=1 SV=2	0.423548	0	7.09514e-28	84.327	84.327	84.327	0	0		NaN	0.185162	0	0.0502917	22.886	0.228987	0	0.00679809	37.157	0.224822	0	0.00112853	36.935	0	0		NaN	0.198455	0	0.00642302	37.687	0.23674	0	0.000322573	42.384	0.423548	0	7.09514e-28	84.327	0.221032	0	0.0144355	27.271	0
P11798	279	P11798	P11798	Calcium/calmodulin-dependent protein kinase type II subunit alpha	Camk2a	>sp|P11798|KCC2A_MOUSE Calcium/calmodulin-dependent protein kinase type II subunit alpha OS=Mus musculus (Mouse) OX=10090 GN=Camk2a PE=1 SV=2	0.500582	0.0102965	0.000187626	56.719	46.344	56.719	0.4971	0	0.0321077	28.627	0.453907	0	0.0361356	23.635	0.500582	0.0102965	0.000187626	56.719	0	0		NaN	0	0		NaN	0.499436	0	0.00622904	39.427	0.4971	0	0.0321077	28.627	0	0		NaN	0.497588	0	0.0302607	30.072	0
P11798	337	P11798	P11798	Calcium/calmodulin-dependent protein kinase type II subunit alpha	Camk2a	>sp|P11798|KCC2A_MOUSE Calcium/calmodulin-dependent protein kinase type II subunit alpha OS=Mus musculus (Mouse) OX=10090 GN=Camk2a PE=1 SV=2	0.975547	17.9101	1.16334e-29	98.292	89.248	98.292	0.575837	4.74274	2.05665e-16	87.352	0	0		NaN	0.975547	17.9101	1.16334e-29	98.292	0	0		NaN	0	0		NaN	0.198455	0	0.00642302	37.687	0.895928	12.5765	2.05665e-16	87.352	0.399191	3.18359	0.000379819	54.15	0.19154	0	0.0338424	27.271	0
P11798	336	P11798	P11798	Calcium/calmodulin-dependent protein kinase type II subunit alpha	Camk2a	>sp|P11798|KCC2A_MOUSE Calcium/calmodulin-dependent protein kinase type II subunit alpha OS=Mus musculus (Mouse) OX=10090 GN=Camk2a PE=1 SV=2	0.57951	1.76211	1.76298e-29	101.17	96.411	101.17	0	0		NaN	0.185162	0	0.0502917	22.886	0.57951	1.76211	1.76298e-29	101.17	0.185162	0	0.0502917	22.886	0	0		NaN	0.198455	0	0.00642302	37.687	0.209751	0	0.0206983	26.157	0	0		NaN	0.19154	0	0.0338424	27.271	0
P11798	334	P11798	P11798	Calcium/calmodulin-dependent protein kinase type II subunit alpha	Camk2a	>sp|P11798|KCC2A_MOUSE Calcium/calmodulin-dependent protein kinase type II subunit alpha OS=Mus musculus (Mouse) OX=10090 GN=Camk2a PE=1 SV=2	0.423548	0	7.09514e-28	84.327	84.327	84.327	0	0		NaN	0.185162	0	0.0502917	22.886	0.228987	0	0.00679809	37.157	0.224822	0	0.00112853	36.935	0	0		NaN	0.198455	0	0.00642302	37.687	0.23674	0	0.000322573	42.384	0.423548	0	7.09514e-28	84.327	0.221032	0	0.0144355	27.271	0
P28652	395	P28652	P28652	Calcium/calmodulin-dependent protein kinase type II subunit beta	Camk2b	>sp|P28652|KCC2B_MOUSE Calcium/calmodulin-dependent protein kinase type II subunit beta OS=Mus musculus (Mouse) OX=10090 GN=Camk2b PE=1 SV=2	0.229015	0	0.00679809	37.157	27.621	37.157	0	0		NaN	0	0		NaN	0.187269	0	0.0577054	25.995	0.225207	0	0.0577054	25.995	0	0		NaN	0	0		NaN	0.229015	0	0.00679809	37.157	0	0		NaN	0	0		NaN
P28652	397	P28652	P28652	Calcium/calmodulin-dependent protein kinase type II subunit beta	Camk2b	>sp|P28652|KCC2B_MOUSE Calcium/calmodulin-dependent protein kinase type II subunit beta OS=Mus musculus (Mouse) OX=10090 GN=Camk2b PE=1 SV=2	0.229015	0	0.00679809	37.157	27.621	37.157	0	0		NaN	0	0		NaN	0.187269	0	0.0577054	25.995	0.225207	0	0.0577054	25.995	0	0		NaN	0	0		NaN	0.229015	0	0.00679809	37.157	0	0		NaN	0	0		NaN
P28652	362	P28652	P28652	Calcium/calmodulin-dependent protein kinase type II subunit beta	Camk2b	>sp|P28652|KCC2B_MOUSE Calcium/calmodulin-dependent protein kinase type II subunit beta OS=Mus musculus (Mouse) OX=10090 GN=Camk2b PE=1 SV=2	0.459727	4.87215	0.00121765	34.512	31.951	34.512	0	0		NaN					0.394727	3.95002	0.0325504	21.347					0.234044	0.370733	0.00614451	20.85					0.21272	0	0.0325504	21.347									0
P28652	367	P28652	P28652	Calcium/calmodulin-dependent protein kinase type II subunit beta	Camk2b	>sp|P28652|KCC2B_MOUSE Calcium/calmodulin-dependent protein kinase type II subunit beta OS=Mus musculus (Mouse) OX=10090 GN=Camk2b PE=1 SV=2	0.606773	1.88472	6.35846e-06	67.118	33.032	67.118	0	0		NaN	0.291557	0	0.00484669	21.857	0.261569	0	0.000697038	32.496	0.606773	1.88472	6.35846e-06	67.118					0.304456	0	0.00516262	33.153	0.291557	0	0.00484669	21.857	0.301354	0	0.00484669	33.153	0.499585	0	0.00285047	41.218	0
P28652	371	P28652	P28652	Calcium/calmodulin-dependent protein kinase type II subunit beta	Camk2b	>sp|P28652|KCC2B_MOUSE Calcium/calmodulin-dependent protein kinase type II subunit beta OS=Mus musculus (Mouse) OX=10090 GN=Camk2b PE=1 SV=2	0.304456	0	6.35846e-06	50.099	47.47	33.153	0	0		NaN	0.291557	0	0.00484669	21.857	0.261569	0	0.000697038	32.496	0.30442	0	6.35846e-06	50.099					0.304456	0	0.00516262	33.153	0.291557	0	0.00484669	21.857	0.301354	0	0.00484669	33.153	0.273384	0	0.00285047	33.825	0
P28652	366	P28652	P28652	Calcium/calmodulin-dependent protein kinase type II subunit beta	Camk2b	>sp|P28652|KCC2B_MOUSE Calcium/calmodulin-dependent protein kinase type II subunit beta OS=Mus musculus (Mouse) OX=10090 GN=Camk2b PE=1 SV=2	0.499585	0	6.35846e-06	50.099	47.47	41.218	0	0		NaN	0.291557	0	0.00484669	21.857	0.261569	0	0.000697038	32.496	0.30442	0	6.35846e-06	50.099					0.304456	0	0.00516262	33.153	0.291557	0	0.00484669	21.857	0.301354	0	0.00484669	33.153	0.499585	0	0.00285047	41.218	0
P28652	400	P28652	P28652	Calcium/calmodulin-dependent protein kinase type II subunit beta	Camk2b	>sp|P28652|KCC2B_MOUSE Calcium/calmodulin-dependent protein kinase type II subunit beta OS=Mus musculus (Mouse) OX=10090 GN=Camk2b PE=1 SV=2	0.229015	0	0.00679809	37.157	27.621	37.157	0	0		NaN	0	0		NaN	0.187269	0	0.0577054	25.995	0.225207	0	0.0577054	25.995	0	0		NaN	0	0		NaN	0.229015	0	0.00679809	37.157	0	0		NaN	0	0		NaN
P28652	398	P28652	P28652	Calcium/calmodulin-dependent protein kinase type II subunit beta	Camk2b	>sp|P28652|KCC2B_MOUSE Calcium/calmodulin-dependent protein kinase type II subunit beta OS=Mus musculus (Mouse) OX=10090 GN=Camk2b PE=1 SV=2	0.229015	0	0.00679809	37.157	27.621	37.157	0	0		NaN	0	0		NaN	0.187269	0	0.0577054	25.995	0.225207	0	0.0577054	25.995	0	0		NaN	0	0		NaN	0.229015	0	0.00679809	37.157	0	0		NaN	0	0		NaN
Q8CDV0	624	Q8CDV0	Q8CDV0	Coiled-coil domain-containing protein 178	Ccdc178	>sp|Q8CDV0|CC178_MOUSE Coiled-coil domain-containing protein 178 OS=Mus musculus (Mouse) OX=10090 GN=Ccdc178 PE=2 SV=2	1	43.0002	0.00696599	43	26.329	43									1	43.0002	0.00696599	43
Q640L5	1105	Q640L5	Q640L5	Coiled-coil domain-containing protein 18	Ccdc18	>sp|Q640L5|CCD18_MOUSE Coiled-coil domain-containing protein 18 OS=Mus musculus (Mouse) OX=10090 GN=Ccdc18 PE=1 SV=1	1	52.4819	0.0128741	52.482	28.393	52.482	0	0		NaN																													1	52.4819	0.0128741	52.482
Q80VN0	244	Q80VN0	Q80VN0	Coiled-coil domain-containing protein 37	Ccdc37	>sp|Q80VN0|CP100_MOUSE Cilia- and flagella-associated protein 100 OS=Mus musculus (Mouse) OX=10090 GN=Cfap100 PE=2 SV=2	0.499952	0	0.000100578	104.42	38.351	104.42																									0.499442	0	0.000406206	87.149									0.499952
Q80VN0	243	Q80VN0	Q80VN0	Coiled-coil domain-containing protein 37	Ccdc37	>sp|Q80VN0|CP100_MOUSE Cilia- and flagella-associated protein 100 OS=Mus musculus (Mouse) OX=10090 GN=Cfap100 PE=2 SV=2	0.499952	0	0.000100578	104.42	38.351	104.42																									0.499442	0	0.000406206	87.149									0.499952
Q8CDE2	270	Q8CDE2	Q8CDE2	Calicin	Ccin	>sp|Q8CDE2|CALI_MOUSE Calicin OS=Mus musculus (Mouse) OX=10090 GN=Ccin PE=1 SV=1	0.496122	0.388845	0.00986637	29.447	22.349	29.447													0.496122	0.388845	0.00986637	29.447
Q8CDE2	280	Q8CDE2	Q8CDE2	Calicin	Ccin	>sp|Q8CDE2|CALI_MOUSE Calicin OS=Mus musculus (Mouse) OX=10090 GN=Ccin PE=1 SV=1	0.996036	23.4866	0.00986637	29.447	22.349	29.447													0.996036	23.4866	0.00986637	29.447
Q9JKC6	7	Q9JKC6	Q9JKC6	Cell cycle exit and neuronal differentiation protein 1	Cend1	>sp|Q9JKC6|CEND_MOUSE Cell cycle exit and neuronal differentiation protein 1 OS=Mus musculus (Mouse) OX=10090 GN=Cend1 PE=1 SV=1	0.354126	0.578098	0.000641104	46.494	41.877	46.494	0	0		NaN	0	0		NaN	0	0		NaN									0.326528	0.492442	0.0065994	35.625	0	0		NaN	0	0		NaN	0	0		NaN	0
Q9JKC6	9	Q9JKC6	Q9JKC6	Cell cycle exit and neuronal differentiation protein 1	Cend1	>sp|Q9JKC6|CEND_MOUSE Cell cycle exit and neuronal differentiation protein 1 OS=Mus musculus (Mouse) OX=10090 GN=Cend1 PE=1 SV=1	0.46609	0.77833	7.78785e-12	70.837	64.563	59.342	0.379942	0	1.75241e-05	54.964	0	0		NaN	0.43621	0	8.06394e-06	58.693	0.384086	0	0.00303504	40.952	0.399915	0	5.30285e-05	52.814	0.354039	0	2.11032e-05	53.554	0.422689	0	0.00402423	39.387	0.449881	0	7.78785e-12	70.837	0.46609	0.77833	6.41592e-06	59.342	0.339647
Q9JKC6	10	Q9JKC6	Q9JKC6	Cell cycle exit and neuronal differentiation protein 1	Cend1	>sp|Q9JKC6|CEND_MOUSE Cell cycle exit and neuronal differentiation protein 1 OS=Mus musculus (Mouse) OX=10090 GN=Cend1 PE=1 SV=1	0.449881	0	7.78785e-12	70.837	64.563	70.837	0.379942	0	1.75241e-05	54.964	0	0		NaN	0.43621	0	8.06394e-06	58.693	0.384086	0	0.00303504	40.952	0.399915	0	5.30285e-05	52.814	0.354039	0	2.11032e-05	53.554	0.422689	0	0.00402423	39.387	0.449881	0	7.78785e-12	70.837	0.344342	0	0.00153442	43.326	0.339647
Q62036	677	Q62036	Q62036	Centrosomal protein of 131 kDa	Cep131	>sp|Q62036|CP131_MOUSE Centrosomal protein of 131 kDa OS=Mus musculus (Mouse) OX=10090 GN=Cep131 PE=1 SV=2	1	39.2528	0.0190315	39.253	25.317	39.253																					1	39.2528	0.0190315	39.253
Q60771	196	Q60771	Q60771	Claudin-11	Cldn11	>sp|Q60771|CLD11_MOUSE Claudin-11 OS=Mus musculus (Mouse) OX=10090 GN=Cldn11 PE=1 SV=1	0.41933	2.36951	1.05068e-10	97.291	84.401	97.291	0.284979	0	3.77783e-05	77.324					0.3043	0	2.35094e-07	83.751																	0	0		NaN					0.311691
Q60771	197	Q60771	Q60771	Claudin-11	Cldn11	>sp|Q60771|CLD11_MOUSE Claudin-11 OS=Mus musculus (Mouse) OX=10090 GN=Cldn11 PE=1 SV=1	0.499136	1.1467	4.31067e-14	111.78	102.49	36.451	0.284979	0	3.77783e-05	77.324	0.405398	0	3.33332e-13	105.39	0.3043	0	2.35094e-07	83.751	0.471958	1.20419	0.0520619	34.87					0.331055	0	1.55832e-13	105.53	0.411336	0	4.99075e-08	87.429	0	0		NaN	0.400454	0	4.54603e-09	94.922	0.311691
Q60771	198	Q60771	Q60771	Claudin-11	Cldn11	>sp|Q60771|CLD11_MOUSE Claudin-11 OS=Mus musculus (Mouse) OX=10090 GN=Cldn11 PE=1 SV=1	0.962872	15.4007	1.04221e-94	185.02	172.13	162.26	0.722534	6.08556	2.62124e-34	148.41	0.723407	6.92547	3.33332e-13	105.39	0.735017	7.02604	5.3113e-14	111.22	0.786405	6.571	2.1762e-26	139.08	0.78285	8.06143	2.90881e-20	129.05	0.73385	6.28813	7.2359e-17	122.14	0.763715	7.20696	4.33879e-20	127.83	0.854637	9.60074	4.21273e-67	173.51	0.733535	6.4253	5.92592e-16	117.2	0.714344
Q9DBP5	158	Q9DBP5	Q9DBP5	UMP-CMP kinase	Cmpk1	>sp|Q9DBP5|KCY_MOUSE UMP-CMP kinase OS=Mus musculus (Mouse) OX=10090 GN=Cmpk1 PE=1 SV=1	0.421928	0	0.0221427	21.848	9.8029	21.848																					0.421928	0	0.0221427	21.848
Q9DBP5	154	Q9DBP5	Q9DBP5	UMP-CMP kinase	Cmpk1	>sp|Q9DBP5|KCY_MOUSE UMP-CMP kinase OS=Mus musculus (Mouse) OX=10090 GN=Cmpk1 PE=1 SV=1	0.720114	4.16981	0.0221427	21.848	9.8029	21.848																					0.720114	4.16981	0.0221427	21.848
Q9DBP5	159	Q9DBP5	Q9DBP5	UMP-CMP kinase	Cmpk1	>sp|Q9DBP5|KCY_MOUSE UMP-CMP kinase OS=Mus musculus (Mouse) OX=10090 GN=Cmpk1 PE=1 SV=1	0.421928	0	0.0221427	21.848	9.8029	21.848																					0.421928	0	0.0221427	21.848
P97427	524	P97427	P97427	Dihydropyrimidinase-related protein 1	Crmp1	>sp|P97427|DPYL1_MOUSE Dihydropyrimidinase-related protein 1 OS=Mus musculus (Mouse) OX=10090 GN=Crmp1 PE=1 SV=1	0.324406	0	0.00102733	35.625	33.192	35.625	0.30316	0	0.00398758	30.042	0.29991	0	0.00474628	28.611	0.324406	0	0.00102733	35.625	0.324406	0	0.00102733	35.625																	0.317839	0	0.0023441	33.142	0.299534
P97427	521	P97427	P97427	Dihydropyrimidinase-related protein 1	Crmp1	>sp|P97427|DPYL1_MOUSE Dihydropyrimidinase-related protein 1 OS=Mus musculus (Mouse) OX=10090 GN=Crmp1 PE=1 SV=1	0.493026	0	0.000219342	64.313	51.391	55.889	0.339697	0	0.00398758	40.405	0.4433	0	0.00474628	40.616	0.489052	0	0.00102733	48.527	0.47974	0	0.00102733	45.654	0.493026	0	0.00143813	55.889	0.468623	0	0.00733934	47.606	0.481417	0	0.0118722	44.132	0.492476	0	0.0054619	49.487	0.449839	0	0.0023441	37.995	0.474602
P97427	522	P97427	P97427	Dihydropyrimidinase-related protein 1	Crmp1	>sp|P97427|DPYL1_MOUSE Dihydropyrimidinase-related protein 1 OS=Mus musculus (Mouse) OX=10090 GN=Crmp1 PE=1 SV=1	0.737694	5.19732	2.07811e-12	97.129	80.906	97.129	0.339697	0	0.00398758	40.405	0.4433	0	0.00474628	40.616	0.489052	0	0.00102733	48.527	0.737694	5.19732	2.07811e-12	97.129	0.493026	0	0.00143813	55.889	0.468623	0	0.00733934	47.606	0.481417	0	0.0118722	44.132	0.492476	0	0.0054619	49.487	0.449839	0	0.0023441	37.995	0.474602
P14847	13	P14847	P14847	C-reactive protein	Crp	>sp|P14847|CRP_MOUSE C-reactive protein OS=Mus musculus (Mouse) OX=10090 GN=Crp PE=1 SV=2	0.5	0	0.00761917	23.362	9.3762	23.362					0	0		NaN	0	0		NaN					0	0		NaN	0	0		NaN	0	0		NaN	0	0		NaN	0	0		NaN
P14847	15	P14847	P14847	C-reactive protein	Crp	>sp|P14847|CRP_MOUSE C-reactive protein OS=Mus musculus (Mouse) OX=10090 GN=Crp PE=1 SV=2	0.5	0	0.00761917	23.362	9.3762	23.362					0	0		NaN	0	0		NaN					0	0		NaN	0	0		NaN	0	0		NaN	0	0		NaN	0	0		NaN
D3Z6P9	587	D3Z6P9	D3Z6P9		Ddx43	>tr|D3Z6P9|D3Z6P9_MOUSE DEAD (Asp-Glu-Ala-Asp) box polypeptide 43 OS=Mus musculus (Mouse) OX=10090 GN=Ddx43 PE=1 SV=1	0.446494	0	0.0042901	40.475	24.338	40.475	0	0		NaN	0	0		NaN																					0	0		NaN	0.435978	0	0.041627	25.982	0
D3Z6P9	585	D3Z6P9	D3Z6P9		Ddx43	>tr|D3Z6P9|D3Z6P9_MOUSE DEAD (Asp-Glu-Ala-Asp) box polypeptide 43 OS=Mus musculus (Mouse) OX=10090 GN=Ddx43 PE=1 SV=1	0.446494	0	0.0042901	40.475	24.338	40.475	0	0		NaN	0	0		NaN																					0	0		NaN	0.435978	0	0.041627	25.982	0
Q8K301	129	Q8K301	Q8K301	Probable ATP-dependent RNA helicase DDX52	Ddx52	>sp|Q8K301|DDX52_MOUSE Probable ATP-dependent RNA helicase DDX52 OS=Mus musculus (Mouse) OX=10090 GN=Ddx52 PE=2 SV=2	1	31.5969	0.00339602	38.783	13.309	31.597	0	0		NaN	0	0		NaN					0	0		NaN	0	0		NaN									0	0		NaN	1	38.7825	0.00339602	38.783	1
Q8K301	130	Q8K301	Q8K301	Probable ATP-dependent RNA helicase DDX52	Ddx52	>sp|Q8K301|DDX52_MOUSE Probable ATP-dependent RNA helicase DDX52 OS=Mus musculus (Mouse) OX=10090 GN=Ddx52 PE=2 SV=2	1	31.5969	0.00339602	38.783	13.309	31.597	0	0		NaN	0	0		NaN					0	0		NaN	0	0		NaN									0	0		NaN	1	38.7825	0.00339602	38.783	1
Q91WG7	52	Q91WG7	Q91WG7	Diacylglycerol kinase gamma	Dgkg	>sp|Q91WG7|DGKG_MOUSE Diacylglycerol kinase gamma OS=Mus musculus (Mouse) OX=10090 GN=Dgkg PE=1 SV=1	1	38.9625	0.0158886	38.962	20.977	38.962	0	0		NaN	0	0		NaN	0	0		NaN	0	0		NaN	0	0		NaN					1	35.2953	0.0220984	35.295	1	38.9625	0.0158886	38.962	0	0		NaN	0
Q91WG7	51	Q91WG7	Q91WG7	Diacylglycerol kinase gamma	Dgkg	>sp|Q91WG7|DGKG_MOUSE Diacylglycerol kinase gamma OS=Mus musculus (Mouse) OX=10090 GN=Dgkg PE=1 SV=1	1	38.9625	0.0158886	38.962	20.977	38.962	0	0		NaN	0	0		NaN	0	0		NaN	0	0		NaN	0	0		NaN					1	35.2953	0.0220984	35.295	1	38.9625	0.0158886	38.962	0	0		NaN	0
Q3UH60	1442	Q3UH60	Q3UH60	Disco-interacting protein 2 homolog B	Dip2b	>sp|Q3UH60|DIP2B_MOUSE Disco-interacting protein 2 homolog B OS=Mus musculus (Mouse) OX=10090 GN=Dip2b PE=1 SV=1	0.497159	0	0.0117725	50.149	7.7237	50.149					0	0		NaN	0	0		NaN	0	0		NaN	0.497159	0	0.0117725	50.149					0	0		NaN									0
Q3UH60	1445	Q3UH60	Q3UH60	Disco-interacting protein 2 homolog B	Dip2b	>sp|Q3UH60|DIP2B_MOUSE Disco-interacting protein 2 homolog B OS=Mus musculus (Mouse) OX=10090 GN=Dip2b PE=1 SV=1	0.497159	0	0.0117725	50.149	7.7237	50.149					0	0		NaN	0	0		NaN	0	0		NaN	0.497159	0	0.0117725	50.149					0	0		NaN									0
Q91XM9	365	Q91XM9	Q91XM9	Disks large homolog 2	Dlg2	>sp|Q91XM9|DLG2_MOUSE Disks large homolog 2 OS=Mus musculus (Mouse) OX=10090 GN=Dlg2 PE=1 SV=2	1	64.1792	1.41663e-09	136.27	118.76	136.27									1	64.1792	1.41663e-09	136.27					0	0		NaN
Q9D415	437	Q9D415	Q9D415	Disks large-associated protein 1	Dlgap1	>sp|Q9D415|DLGP1_MOUSE Disks large-associated protein 1 OS=Mus musculus (Mouse) OX=10090 GN=Dlgap1 PE=1 SV=3	0.499991	0	0.0139107	57.288	46.935	57.288	0	0		NaN					0.499767	0	0.0139107	43.592	0	0		NaN									0.499991	0	0.0145808	57.288	0.499438	0	0.0197086	40.242	0	0		NaN	0
Q9D415	436	Q9D415	Q9D415	Disks large-associated protein 1	Dlgap1	>sp|Q9D415|DLGP1_MOUSE Disks large-associated protein 1 OS=Mus musculus (Mouse) OX=10090 GN=Dlgap1 PE=1 SV=3	0.499991	0	0.0139107	57.288	46.935	57.288	0	0		NaN					0.499767	0	0.0139107	43.592	0	0		NaN									0.499991	0	0.0145808	57.288	0.499438	0	0.0197086	40.242	0	0		NaN	0
E9Q0B6	2661	E9Q0B6	E9Q0B6		Dnah6	>tr|E9Q0B6|E9Q0B6_MOUSE Dynein, axonemal, heavy chain 6 OS=Mus musculus (Mouse) OX=10090 GN=Dnah6 PE=1 SV=1	0.227846	0	0.00761694	21.569	6.519	21.569	0	0		NaN									0.227846	0	0.00761694	21.569	0	0		NaN									0	0		NaN
E9Q0B6	2657	E9Q0B6	E9Q0B6		Dnah6	>tr|E9Q0B6|E9Q0B6_MOUSE Dynein, axonemal, heavy chain 6 OS=Mus musculus (Mouse) OX=10090 GN=Dnah6 PE=1 SV=1	0.152279	0	0.00165237	27.129	18.282	27.129	0	0		NaN													0	0		NaN					0.152279	0	0.00165237	27.129	0	0		NaN
E9Q0B6	2658	E9Q0B6	E9Q0B6		Dnah6	>tr|E9Q0B6|E9Q0B6_MOUSE Dynein, axonemal, heavy chain 6 OS=Mus musculus (Mouse) OX=10090 GN=Dnah6 PE=1 SV=1	0.152279	0	0.00165237	27.129	18.282	27.129	0	0		NaN													0	0		NaN					0.152279	0	0.00165237	27.129	0	0		NaN
E9Q0B6	2660	E9Q0B6	E9Q0B6		Dnah6	>tr|E9Q0B6|E9Q0B6_MOUSE Dynein, axonemal, heavy chain 6 OS=Mus musculus (Mouse) OX=10090 GN=Dnah6 PE=1 SV=1	0.227846	0	0.00761694	21.569	6.519	21.569	0	0		NaN									0.227846	0	0.00761694	21.569	0	0		NaN									0	0		NaN
B1AR51	550	B1AR51	B1AR51		Dnah9	>tr|B1AR51|B1AR51_MOUSE Dynein, axonemal, heavy chain 9 OS=Mus musculus (Mouse) OX=10090 GN=Dnah9 PE=1 SV=1	0.985984	18.4103	0.0066936	22.936	13.737	22.936																	0.985984	18.4103	0.0066936	22.936
B1AR51	548	B1AR51	B1AR51		Dnah9	>tr|B1AR51|B1AR51_MOUSE Dynein, axonemal, heavy chain 9 OS=Mus musculus (Mouse) OX=10090 GN=Dnah9 PE=1 SV=1	0.985984	18.4103	0.0066936	22.936	13.737	22.936																	0.985984	18.4103	0.0066936	22.936
P60904	10	P60904	P60904	DnaJ homolog subfamily C member 5	Dnajc5	>sp|P60904|DNJC5_MOUSE DnaJ homolog subfamily C member 5 OS=Mus musculus (Mouse) OX=10090 GN=Dnajc5 PE=1 SV=1	0.998399	28.1684	6.55803e-221	231.4	190.07	231.4	0.96833	14.8835	6.17897e-101	177.29	0.947985	13.2664	1.36581e-43	132.65	0.998399	28.1684	6.55803e-221	231.4	0.647779	5.43158	4.68099e-24	76.002	0.883331	11.9924	2.07363e-11	63.869	0.935561	12.7964	5.19471e-13	81.884	0.984287	18.9333	1.51837e-43	131.8	0.646682	5.32818	2.84868e-55	104.09	0.993959	22.7326	7.61743e-118	192.25	0.504609
P09838	207	P09838	P09838	DNA nucleotidylexotransferase	Dntt	>sp|P09838|TDT_MOUSE DNA nucleotidylexotransferase OS=Mus musculus (Mouse) OX=10090 GN=Dntt PE=1 SV=4	0.497709	0	0.00383331	27.263	10.734	27.263													0.497709	0	0.00383331	27.263
P09838	206	P09838	P09838	DNA nucleotidylexotransferase	Dntt	>sp|P09838|TDT_MOUSE DNA nucleotidylexotransferase OS=Mus musculus (Mouse) OX=10090 GN=Dntt PE=1 SV=4	0.497709	0	0.00383331	27.263	10.734	27.263													0.497709	0	0.00383331	27.263
Q3UHQ6	1814	Q3UHQ6	Q3UHQ6	Protein dopey-2	Dopey2	>sp|Q3UHQ6|DOP2_MOUSE Protein dopey-2 OS=Mus musculus (Mouse) OX=10090 GN=Dop1b PE=1 SV=3	0.754489	4.90166	0.0172904	27.914	9.579	27.914									0.754489	4.90166	0.0172904	27.914
O08553	517	O08553	O08553	Dihydropyrimidinase-related protein 2	Dpysl2	>sp|O08553|DPYL2_MOUSE Dihydropyrimidinase-related protein 2 OS=Mus musculus (Mouse) OX=10090 GN=Dpysl2 PE=1 SV=2	0.382776	1.45858	0.00134647	46.121	28.909	46.121	0	0		NaN	0.315201	0	0.00134647	40.968	0.293	0	0.00191728	39.387	0	0		NaN	0	0		NaN	0.247876	0	0.00597627	34.174	0	0		NaN	0.247672	0	0.0140367	29.603	0.382776	1.45858	0.00596397	46.121	0.230357
O08553	518	O08553	O08553	Dihydropyrimidinase-related protein 2	Dpysl2	>sp|O08553|DPYL2_MOUSE Dihydropyrimidinase-related protein 2 OS=Mus musculus (Mouse) OX=10090 GN=Dpysl2 PE=1 SV=2	0.36456	1.299	0.00134647	47.548	34.447	47.548	0	0		NaN	0.315201	0	0.00134647	40.968	0.293	0	0.00191728	39.387	0	0		NaN	0	0		NaN	0.247876	0	0.00597627	34.174	0	0		NaN	0.247672	0	0.0140367	29.603	0	0		NaN	0.36456
O08553	522	O08553	O08553	Dihydropyrimidinase-related protein 2	Dpysl2	>sp|O08553|DPYL2_MOUSE Dihydropyrimidinase-related protein 2 OS=Mus musculus (Mouse) OX=10090 GN=Dpysl2 PE=1 SV=2	0.787987	5.82788	3.77978e-11	98.573	75.996	81.51	0.702568	4.72803	3.77978e-11	98.573	0.633207	5.92381	0.0132693	62.466	0.5	0	0.0173201	58.274	0	0		NaN	0.5	0	0.0395534	53.237	0.5	0	0.00597627	61.344	0.5	0	0.016252	44.847	0.5	0	0.00407611	70.942	0.5	0	0.0364088	52.247	0.750821
O08553	521	O08553	O08553	Dihydropyrimidinase-related protein 2	Dpysl2	>sp|O08553|DPYL2_MOUSE Dihydropyrimidinase-related protein 2 OS=Mus musculus (Mouse) OX=10090 GN=Dpysl2 PE=1 SV=2	0.5	0	3.77978e-11	98.573	75.996	61.344	0.5	0	3.77978e-11	98.573	0.5	0	0.00134647	62.466	0.5	0	0.00191728	58.274	0.357984	1.4798	0.00824331	41.911	0.5	0	0.0395534	53.237	0.5	0	0.00597627	61.344	0.5	0	0.016252	44.847	0.5	0	0.00407611	70.942	0.5	0	0.0364088	52.247	0.5
O08553	509	O08553	O08553	Dihydropyrimidinase-related protein 2	Dpysl2	>sp|O08553|DPYL2_MOUSE Dihydropyrimidinase-related protein 2 OS=Mus musculus (Mouse) OX=10090 GN=Dpysl2 PE=1 SV=2	0.988482	19.3361	5.90785e-13	96.391	86.32	92.474	0.947747	12.5858	0.000138465	83.423	0.950345	12.8192	6.02176e-08	90.718	0.912334	10.1733	0.0124599	56.017	0.921502	10.6981	0.010874	45.347	0.982755	17.5577	7.24019e-07	81.807	0.946156	12.4483	0.00108113	77.871	0.988482	19.3361	7.81133e-12	92.474	0.761337	5.04626	5.90785e-13	96.391	0.933999	11.508	0.0212358	61.276	0.950647
Q6ZQ18	403	Q6ZQ18	Q6ZQ18	Protein EFR3 homolog B	Efr3b	>sp|Q6ZQ18|EFR3B_MOUSE Protein EFR3 homolog B OS=Mus musculus (Mouse) OX=10090 GN=Efr3b PE=1 SV=2	0.995259	23.2203	0.0115592	32.415	13.79	32.415																													0.995259	23.2203	0.0115592	32.415
Q9QXY6	474	Q9QXY6	Q9QXY6	EH domain-containing protein 3	Ehd3	>sp|Q9QXY6|EHD3_MOUSE EH domain-containing protein 3 OS=Mus musculus (Mouse) OX=10090 GN=Ehd3 PE=1 SV=2	0.873243	8.38164	0.00662554	55.261	8.3816	55.261	0	0		NaN					0	0		NaN	0	0		NaN	0.873243	8.38164	0.00662554	55.261	0	0		NaN	0	0		NaN	0	0		NaN	0	0		NaN	0
Q5DW34	641	Q5DW34	Q5DW34	Histone-lysine N-methyltransferase EHMT1	Ehmt1	>sp|Q5DW34|EHMT1_MOUSE Histone-lysine N-methyltransferase EHMT1 OS=Mus musculus (Mouse) OX=10090 GN=Ehmt1 PE=1 SV=2	0.457063	0	0.0189336	21.997	8.1319	21.997													0	0		NaN	0	0		NaN	0	0		NaN	0	0		NaN	0.457063	0	0.0189336	21.997	0	0		NaN
Q5DW34	647	Q5DW34	Q5DW34	Histone-lysine N-methyltransferase EHMT1	Ehmt1	>sp|Q5DW34|EHMT1_MOUSE Histone-lysine N-methyltransferase EHMT1 OS=Mus musculus (Mouse) OX=10090 GN=Ehmt1 PE=1 SV=2	0.457063	0	0.0189336	21.997	8.1319	21.997													0	0		NaN	0	0		NaN	0	0		NaN	0	0		NaN	0.457063	0	0.0189336	21.997	0	0		NaN
Q5DW34	648	Q5DW34	Q5DW34	Histone-lysine N-methyltransferase EHMT1	Ehmt1	>sp|Q5DW34|EHMT1_MOUSE Histone-lysine N-methyltransferase EHMT1 OS=Mus musculus (Mouse) OX=10090 GN=Ehmt1 PE=1 SV=2	0.403719	2.30791	0.0189336	21.997	8.1319	21.997													0	0		NaN	0	0		NaN	0	0		NaN	0	0		NaN	0.403719	2.30791	0.0189336	21.997	0	0		NaN
B2RWS6	1331	B2RWS6	B2RWS6	Histone acetyltransferase p300	Ep300	>sp|B2RWS6|EP300_MOUSE Histone acetyltransferase p300 OS=Mus musculus (Mouse) OX=10090 GN=Ep300 PE=1 SV=2	0.421189	0	0.0031767	34.65	8.6637	34.65																	0.421189	0	0.0031767	34.65					0	0		NaN									0
B2RWS6	1328	B2RWS6	B2RWS6	Histone acetyltransferase p300	Ep300	>sp|B2RWS6|EP300_MOUSE Histone acetyltransferase p300 OS=Mus musculus (Mouse) OX=10090 GN=Ep300 PE=1 SV=2	0.421189	0	0.0031767	34.65	8.6637	34.65																	0.421189	0	0.0031767	34.65					0	0		NaN									0
D3Z6S9	236	D3Z6S9	D3Z6S9	Glutamate-rich protein 6	Erich6	>sp|D3Z6S9|ERIP6_MOUSE Glutamate-rich protein 6 OS=Mus musculus (Mouse) OX=10090 GN=Erich6 PE=3 SV=1	0.703605	8.56923	0.020559	20.949	14.175	20.949	0.703605	8.56923	0.020559	20.949	0	0		NaN													0	0		NaN	0	0		NaN	0	0		NaN					0
D3Z6S9	238	D3Z6S9	D3Z6S9	Glutamate-rich protein 6	Erich6	>sp|D3Z6S9|ERIP6_MOUSE Glutamate-rich protein 6 OS=Mus musculus (Mouse) OX=10090 GN=Erich6 PE=3 SV=1	0.703605	8.56923	0.020559	20.949	14.175	20.949	0.703605	8.56923	0.020559	20.949	0	0		NaN													0	0		NaN	0	0		NaN	0	0		NaN					0
Q3UVK0	773	Q3UVK0	Q3UVK0	Endoplasmic reticulum metallopeptidase 1	Ermp1	>sp|Q3UVK0|ERMP1_MOUSE Endoplasmic reticulum metallopeptidase 1 OS=Mus musculus (Mouse) OX=10090 GN=Ermp1 PE=1 SV=2	0.99903	30.1285	0.016797	46.069	9.7766	46.069	0	0		NaN					0.994225	22.3596	0.016797	38.3	0.996047	24.0137	0.0231253	46.069	0.99903	30.1285	0.0231253	46.069	0	0		NaN	0	0		NaN	0	0		NaN	0	0		NaN	0
A2AIP0	59	A2AIP0	A2AIP0	Protein FAM166B	Fam166b	>sp|A2AIP0|F166B_MOUSE Protein FAM166B OS=Mus musculus (Mouse) OX=10090 GN=Fam166b PE=2 SV=1	0.996832	24.978	0.0225752	38.567	9.6095	38.567									0	0		NaN	0	0		NaN									0.996832	24.978	0.0225752	38.567
E9PXM9	227	E9PXM9	E9PXM9		Fbxw24	>tr|E9PXM9|E9PXM9_MOUSE F-box domain-containing protein OS=Mus musculus (Mouse) OX=10090 GN=Fbxw24 PE=4 SV=1	0.987192	18.813	0.00219974	20.767	15.116	20.767																					0.987192	18.813	0.00219974	20.767									0	0		NaN
E9PXM9	228	E9PXM9	E9PXM9		Fbxw24	>tr|E9PXM9|E9PXM9_MOUSE F-box domain-containing protein OS=Mus musculus (Mouse) OX=10090 GN=Fbxw24 PE=4 SV=1	0.987319	18.8562	0.00219974	20.767	15.116	20.767																					0.987319	18.8562	0.00219974	20.767									0	0		NaN
Q71KU9	6	Q71KU9	Q71KU9	Fibrinogen-like protein 1	Fgl1	>sp|Q71KU9|FGL1_MOUSE Fibrinogen-like protein 1 OS=Mus musculus (Mouse) OX=10090 GN=Fgl1 PE=1 SV=2	0.527595	0.479862	0.00216918	26.771	6.3328	26.771													0	0		NaN													0.527595	0.479862	0.00216918	26.771
A2ARZ3	4783	A2ARZ3	A2ARZ3	Fibrous sheath-interacting protein 2	Fsip2	>sp|A2ARZ3|FSIP2_MOUSE Fibrous sheath-interacting protein 2 OS=Mus musculus (Mouse) OX=10090 GN=Fsip2 PE=1 SV=3	0.475853	0	0.0050581	29.099	20.628	29.099					0	0		NaN					0	0		NaN
A2ARZ3	4785	A2ARZ3	A2ARZ3	Fibrous sheath-interacting protein 2	Fsip2	>sp|A2ARZ3|FSIP2_MOUSE Fibrous sheath-interacting protein 2 OS=Mus musculus (Mouse) OX=10090 GN=Fsip2 PE=1 SV=3	0.475853	0	0.0050581	29.099	20.628	29.099					0	0		NaN					0	0		NaN
A2ARZ3	4930	A2ARZ3	A2ARZ3	Fibrous sheath-interacting protein 2	Fsip2	>sp|A2ARZ3|FSIP2_MOUSE Fibrous sheath-interacting protein 2 OS=Mus musculus (Mouse) OX=10090 GN=Fsip2 PE=1 SV=3	0.478846	0	0.0131933	26.711	11.832	26.711																	0.478846	0	0.0131933	26.711
A2ARZ3	4932	A2ARZ3	A2ARZ3	Fibrous sheath-interacting protein 2	Fsip2	>sp|A2ARZ3|FSIP2_MOUSE Fibrous sheath-interacting protein 2 OS=Mus musculus (Mouse) OX=10090 GN=Fsip2 PE=1 SV=3	0.478846	0	0.0131933	26.711	11.832	26.711																	0.478846	0	0.0131933	26.711
P48320	278	P48320	P48320	Glutamate decarboxylase 2	Gad2	>sp|P48320|DCE2_MOUSE Glutamate decarboxylase 2 OS=Mus musculus (Mouse) OX=10090 GN=Gad2 PE=1 SV=1	0.486576	0	0.0167906	24.901	9.3555	24.901	0	0		NaN	0	0		NaN	0	0		NaN					0	0		NaN	0	0		NaN	0	0		NaN	0	0		NaN	0.486576	0	0.0167906	24.901	0
P48320	284	P48320	P48320	Glutamate decarboxylase 2	Gad2	>sp|P48320|DCE2_MOUSE Glutamate decarboxylase 2 OS=Mus musculus (Mouse) OX=10090 GN=Gad2 PE=1 SV=1	0.965801	16.0547	0.0167906	24.901	9.3555	24.901	0	0		NaN	0	0		NaN	0	0		NaN					0	0		NaN	0	0		NaN	0	0		NaN	0	0		NaN	0.965801	16.0547	0.0167906	24.901	0
P48320	277	P48320	P48320	Glutamate decarboxylase 2	Gad2	>sp|P48320|DCE2_MOUSE Glutamate decarboxylase 2 OS=Mus musculus (Mouse) OX=10090 GN=Gad2 PE=1 SV=1	0.486576	0	0.0167906	24.901	9.3555	24.901	0	0		NaN	0	0		NaN	0	0		NaN					0	0		NaN	0	0		NaN	0	0		NaN	0	0		NaN	0.486576	0	0.0167906	24.901	0
P06837	144	P06837	P06837	Neuromodulin	Gap43	>sp|P06837|NEUM_MOUSE Neuromodulin OS=Mus musculus (Mouse) OX=10090 GN=Gap43 PE=1 SV=1	0.280407	0	0.0153985	28.831	26.833	28.831					0	0		NaN	0	0		NaN	0	0		NaN					0	0		NaN	0	0		NaN	0	0		NaN	0	0		NaN	0.280407
P06837	145	P06837	P06837	Neuromodulin	Gap43	>sp|P06837|NEUM_MOUSE Neuromodulin OS=Mus musculus (Mouse) OX=10090 GN=Gap43 PE=1 SV=1	0.280407	0	0.0153985	28.831	26.833	28.831					0	0		NaN	0	0		NaN	0	0		NaN					0	0		NaN	0	0		NaN	0	0		NaN	0	0		NaN	0.280407
P06837	142	P06837	P06837	Neuromodulin	Gap43	>sp|P06837|NEUM_MOUSE Neuromodulin OS=Mus musculus (Mouse) OX=10090 GN=Gap43 PE=1 SV=1	0.558535	5.38923	1.03825e-06	57.738	46.095	37.526	0.558535	5.38923	0.00258934	37.526	0.443262	0.449827	0.000525708	43.241	0	0		NaN	0	0		NaN					0.47153	0	1.03825e-06	57.738	0	0		NaN	0	0		NaN	0	0		NaN	0.280407
P06837	86	P06837	P06837	Neuromodulin	Gap43	>sp|P06837|NEUM_MOUSE Neuromodulin OS=Mus musculus (Mouse) OX=10090 GN=Gap43 PE=1 SV=1	0.885726	10.0289	0.000513121	39.57	38.267	39.57	0.846488	11.8416	0.0167112	26.446	0	0		NaN	0.885726	10.0289	0.000513121	39.57					0	0		NaN	0	0		NaN					0	0		NaN					0
P06837	139	P06837	P06837	Neuromodulin	Gap43	>sp|P06837|NEUM_MOUSE Neuromodulin OS=Mus musculus (Mouse) OX=10090 GN=Gap43 PE=1 SV=1	0.584888	5.31595	1.03825e-06	57.738	46.095	45.941	0.381688	0.539965	0.0160437	39.276	0	0		NaN	0.357162	3.17168	0.00723236	28.79	0	0		NaN	0.584888	5.31595	0.000638569	45.941	0.47153	0	1.03825e-06	57.738	0	0		NaN	0	0		NaN	0	0		NaN	0
Q68FF6	370	Q68FF6	Q68FF6	ARF GTPase-activating protein GIT1	Git1	>sp|Q68FF6|GIT1_MOUSE ARF GTPase-activating protein GIT1 OS=Mus musculus (Mouse) OX=10090 GN=Git1 PE=1 SV=1	0.497142	0	0.000131321	72.433	48.977	72.433	0.497142	0	0.000131321	72.433	0	0		NaN	0	0		NaN	0	0		NaN	0.474301	0	0.0291427	46.318					0.485492	0	0.0605419	58.246	0	0		NaN	0	0		NaN	0
Q68FF6	371	Q68FF6	Q68FF6	ARF GTPase-activating protein GIT1	Git1	>sp|Q68FF6|GIT1_MOUSE ARF GTPase-activating protein GIT1 OS=Mus musculus (Mouse) OX=10090 GN=Git1 PE=1 SV=1	0.497142	0	0.000131321	72.433	48.977	72.433	0.497142	0	0.000131321	72.433	0	0		NaN	0	0		NaN	0	0		NaN	0.474301	0	0.0291427	46.318					0.485492	0	0.0605419	58.246	0	0		NaN	0	0		NaN	0
L7N296;K7N734;E9QAJ8;E9PW72;E9PVJ0;M0QW81;L7N2C5	10;10;10;10;10;10;10	L7N296	L7N296		Gm3739;Gm8108;Gm3468;Gm3002;Gm3005;Gm3488;Gm3264	>tr|L7N296|L7N296_MOUSE Takusan domain-containing protein OS=Mus musculus (Mouse) OX=10090 GN=Gm3739 PE=4 SV=1;>tr|K7N734|K7N734_MOUSE Takusan domain-containing protein OS=Mus musculus (Mouse) OX=10090 GN=Gm8108 PE=4 SV=1;>tr|E9QAJ8|E9QAJ8_MOUSE Takusan do	0.780014	7.38837	0.011818	21.242	11.677	21.242
L7N296;K7N734;E9QAJ8;E9PW72;E9PVJ0;M0QW81;L7N2C5	14;14;14;14;14;14;14	L7N296	L7N296		Gm3739;Gm8108;Gm3468;Gm3002;Gm3005;Gm3488;Gm3264	>tr|L7N296|L7N296_MOUSE Takusan domain-containing protein OS=Mus musculus (Mouse) OX=10090 GN=Gm3739 PE=4 SV=1;>tr|K7N734|K7N734_MOUSE Takusan domain-containing protein OS=Mus musculus (Mouse) OX=10090 GN=Gm8108 PE=4 SV=1;>tr|E9QAJ8|E9QAJ8_MOUSE Takusan do	0.912848	16.8281	0.011818	21.242	11.677	21.242
Q3ULG3	4	Q3ULG3	Q3ULG3		Gm694	>sp|Q3ULG3|SRARP_MOUSE Steroid receptor-associated and regulated protein OS=Mus musculus (Mouse) OX=10090 GN=Srarp PE=2 SV=1	1	32.3548	0.0216711	32.355	8.3995	32.355					0	0		NaN																	1	32.3548	0.0216711	32.355
A2AJA9	109	A2AJA9	A2AJA9	Uncharacterized protein C9orf172 homolog	Gm996	>sp|A2AJA9|AJM1_MOUSE Apical junction component 1 homolog OS=Mus musculus (Mouse) OX=10090 GN=Ajm1 PE=1 SV=1	0.997353	25.762	1.41967e-11	85.737	71.654	85.737	0.997353	25.762	1.41967e-11	85.737	0	0		NaN	0.982614	17.5229	7.52874e-07	71.148	0.993162	21.6395	0.00718762	58.093									0	0		NaN
G5E8Q8	331	G5E8Q8	G5E8Q8		Gpr116	>sp|G5E8Q8|AGRF5_MOUSE Adhesion G protein-coupled receptor F5 OS=Mus musculus (Mouse) OX=10090 GN=Adgrf5 PE=1 SV=1	0.79237	6.01602	0.00725153	27.263	13.844	27.263																	0.79237	6.01602	0.00725153	27.263
G5E8Q8	322	G5E8Q8	G5E8Q8		Gpr116	>sp|G5E8Q8|AGRF5_MOUSE Adhesion G protein-coupled receptor F5 OS=Mus musculus (Mouse) OX=10090 GN=Adgrf5 PE=1 SV=1	0.459161	0	0.00725153	27.263	13.844	27.263																	0.459161	0	0.00725153	27.263
G5E8Q8	321	G5E8Q8	G5E8Q8		Gpr116	>sp|G5E8Q8|AGRF5_MOUSE Adhesion G protein-coupled receptor F5 OS=Mus musculus (Mouse) OX=10090 GN=Adgrf5 PE=1 SV=1	0.459161	0	0.00725153	27.263	13.844	27.263																	0.459161	0	0.00725153	27.263
Q01097	888	Q01097	Q01097	Glutamate receptor ionotropic, NMDA 2B	Grin2b	>sp|Q01097|NMDE2_MOUSE Glutamate receptor ionotropic, NMDA 2B OS=Mus musculus (Mouse) OX=10090 GN=Grin2b PE=1 SV=3	0.467542	0	8.64905e-05	50.358	35.165	47.016									0.437845	0	8.64905e-05	50.358	0.467542	0	0.000189043	47.016	0.419393	0	0.00634349	36.923									0.456043	0	0.00487734	38.736	0.434431	0	0.000428449	44.238	0
Q61039	191	Q61039	Q61039	Heart- and neural crest derivatives-expressed protein 2	Hand2	>sp|Q61039|HAND2_MOUSE Heart- and neural crest derivatives-expressed protein 2 OS=Mus musculus (Mouse) OX=10090 GN=Hand2 PE=1 SV=3	0.377712	0	0.0110736	31.614	9.7959	31.614					0.377712	0	0.0110736	31.614
Q61039	192	Q61039	Q61039	Heart- and neural crest derivatives-expressed protein 2	Hand2	>sp|Q61039|HAND2_MOUSE Heart- and neural crest derivatives-expressed protein 2 OS=Mus musculus (Mouse) OX=10090 GN=Hand2 PE=1 SV=3	0.377712	0	0.0110736	31.614	9.7959	31.614					0.377712	0	0.0110736	31.614
P51859	165	P51859	P51859	Hepatoma-derived growth factor	Hdgf	>sp|P51859|HDGF_MOUSE Hepatoma-derived growth factor OS=Mus musculus (Mouse) OX=10090 GN=Hdgf PE=1 SV=2	1	49.5946	0.000178515	65.231	54.131	49.595	1	38.8891	0.0223199	38.889	1	39.91	0.0197644	39.91	1	57.2884	0.00110029	57.288	1	37.1767	0.0266062	37.177	1	34.9283	0.0419831	34.928	1	49.5946	0.00453092	49.595	1	43.5923	0.0105471	43.592	1	65.231	0.000178515	65.231	1	41.0881	0.0168156	41.088	1
P43274	2	P43274	P43274	Histone H1.4	Hist1h1e	>sp|P43274|H14_MOUSE Histone H1.4 OS=Mus musculus (Mouse) OX=10090 GN=H1-4 PE=1 SV=2	0.838985	7.16888	4.38945e-12	84.249	74.598	84.249	0.819935	6.5835	1.80998e-05	63.302	0.808632	6.25882	2.11337e-06	69.747	0.838985	7.16888	4.38945e-12	84.249	0.800388	6.03114	1.94954e-05	62.739	0.805423	6.16934	0.00127533	50.957	0.783213	5.57846	7.13399e-08	71.842	0.818311	6.53589	1.97999e-05	62.617	0.793201	5.83836	0.000366604	56.708	0.794914	5.88384	0.00233415	47.499	0.765698
Q91W97	860	Q91W97	Q91W97	Putative hexokinase HKDC1	Hkdc1	>sp|Q91W97|HKDC1_MOUSE Hexokinase HKDC1 OS=Mus musculus (Mouse) OX=10090 GN=Hkdc1 PE=2 SV=1	0.517059	0.481468	0.0171857	29.58	17.088	29.58	0	0		NaN	0	0		NaN	0	0		NaN	0	0		NaN					0	0		NaN	0.517059	0.481468	0.0171857	29.58					0	0		NaN	0
Q8VEK3	247	Q8VEK3	Q8VEK3	Heterogeneous nuclear ribonucleoprotein U	Hnrnpu	>sp|Q8VEK3|HNRPU_MOUSE Heterogeneous nuclear ribonucleoprotein U OS=Mus musculus (Mouse) OX=10090 GN=Hnrnpu PE=1 SV=1	0.998861	29.4312	1.12776e-35	87.005	82.149	87.005	0.95748	13.5316	1.94861e-11	53.214	0.69232	3.55151	0.00052287	33.825	0.879407	8.6315	1.74283e-07	49.087	0.896146	9.35979	1.20735e-17	65.244	0.915015	10.3215	1.50895e-12	61.186	0.676192	3.33583	0.00158092	28.416	0.998861	29.4312	1.12776e-35	87.005	0.962859	14.1372	5.2884e-18	68.234	0.718434	4.06877	1.56079e-11	54.934	0
Q00PI9	224	Q00PI9	Q00PI9	Heterogeneous nuclear ribonucleoprotein U-like protein 2	Hnrnpul2	>sp|Q00PI9|HNRL2_MOUSE Heterogeneous nuclear ribonucleoprotein U-like protein 2 OS=Mus musculus (Mouse) OX=10090 GN=Hnrnpul2 PE=1 SV=2	0.496954	0	6.25146e-27	72.214	66.933	65.152	0.496954	0	5.95138e-19	65.152	0	0		NaN					0	0		NaN	0	0		NaN	0	0		NaN	0.473701	0	5.28652e-19	65.757	0.433747	0	6.25146e-27	72.214	0	0		NaN
Q00PI9	226	Q00PI9	Q00PI9	Heterogeneous nuclear ribonucleoprotein U-like protein 2	Hnrnpul2	>sp|Q00PI9|HNRL2_MOUSE Heterogeneous nuclear ribonucleoprotein U-like protein 2 OS=Mus musculus (Mouse) OX=10090 GN=Hnrnpul2 PE=1 SV=2	0.496954	0	6.25146e-27	72.214	66.933	65.152	0.496954	0	5.95138e-19	65.152	0	0		NaN					0	0		NaN	0	0		NaN	0	0		NaN	0.473701	0	5.28652e-19	65.757	0.433747	0	6.25146e-27	72.214	0	0		NaN
Q3TEA8	47	Q3TEA8	Q3TEA8	Heterochromatin protein 1-binding protein 3	Hp1bp3	>sp|Q3TEA8|HP1B3_MOUSE Heterochromatin protein 1-binding protein 3 OS=Mus musculus (Mouse) OX=10090 GN=Hp1bp3 PE=1 SV=1	0.368619	0	0.00137524	55.755	25.683	55.755	0.331663	0	0.0204677	39.629	0	0		NaN	0.368101	0	0.006011	47.639	0	0		NaN	0.364416	0	0.0213163	44.252	0.368619	0	0.00137524	55.755	0	0		NaN	0	0		NaN					0
Q3TEA8	48	Q3TEA8	Q3TEA8	Heterochromatin protein 1-binding protein 3	Hp1bp3	>sp|Q3TEA8|HP1B3_MOUSE Heterochromatin protein 1-binding protein 3 OS=Mus musculus (Mouse) OX=10090 GN=Hp1bp3 PE=1 SV=1	0.368619	0	0.00137524	55.755	25.683	55.755	0.331663	0	0.0204677	39.629	0	0		NaN	0.368101	0	0.006011	47.639	0	0		NaN	0.364416	0	0.0213163	44.252	0.368619	0	0.00137524	55.755	0	0		NaN	0	0		NaN					0
Q3TEA8	51	Q3TEA8	Q3TEA8	Heterochromatin protein 1-binding protein 3	Hp1bp3	>sp|Q3TEA8|HP1B3_MOUSE Heterochromatin protein 1-binding protein 3 OS=Mus musculus (Mouse) OX=10090 GN=Hp1bp3 PE=1 SV=1	0.331663	0	0.0204677	39.629	19.537	39.629	0.331663	0	0.0204677	39.629	0	0		NaN					0	0		NaN									0	0		NaN	0	0		NaN					0
P38647	390	P38647	P38647	Stress-70 protein, mitochondrial	Hspa9	>sp|P38647|GRP75_MOUSE Stress-70 protein, mitochondrial OS=Mus musculus (Mouse) OX=10090 GN=Hspa9 PE=1 SV=3	0.999995	52.6714	0.00243401	55.899	32.431	55.899																	0.999975	45.9881	0.00243401	47.606
Q8CJ70	105	Q8CJ70	Q8CJ70	Interleukin-19	Il19	>sp|Q8CJ70|IL19_MOUSE Interleukin-19 OS=Mus musculus (Mouse) OX=10090 GN=Il19 PE=2 SV=1	1	20.1243	0.0107277	20.124	12	20.124	0	0		NaN	1	20.1243	0.0107277	20.124																					0	0		NaN	1	20.1243	0.0107277	20.124
Q8CJ70	109	Q8CJ70	Q8CJ70	Interleukin-19	Il19	>sp|Q8CJ70|IL19_MOUSE Interleukin-19 OS=Mus musculus (Mouse) OX=10090 GN=Il19 PE=2 SV=1	1	20.1243	0.0107277	20.124	12	20.124	0	0		NaN	1	20.1243	0.0107277	20.124																					0	0		NaN	1	20.1243	0.0107277	20.124
Q8CJ70	104	Q8CJ70	Q8CJ70	Interleukin-19	Il19	>sp|Q8CJ70|IL19_MOUSE Interleukin-19 OS=Mus musculus (Mouse) OX=10090 GN=Il19 PE=2 SV=1	1	20.1243	0.0107277	20.124	12	20.124	0	0		NaN	1	20.1243	0.0107277	20.124																					0	0		NaN	1	20.1243	0.0107277	20.124
F8VQ29	1080	F8VQ29	F8VQ29		Iqgap3	>tr|F8VQ29|F8VQ29_MOUSE IQ motif-containing GTPase-activating protein 3 OS=Mus musculus (Mouse) OX=10090 GN=Iqgap3 PE=1 SV=1	0.997285	27.1327	0.00585055	34.264	18.72	34.264	0	0		NaN	0	0		NaN	0.986179	19.9664	0.017777	27.098	0	0		NaN	0.997285	27.1327	0.00585055	34.264	0.996897	26.6387	0.00697484	33.589	0	0		NaN	0.986179	19.9664	0.017777	27.098	0	0		NaN	0
F8VQ29	1074	F8VQ29	F8VQ29		Iqgap3	>tr|F8VQ29|F8VQ29_MOUSE IQ motif-containing GTPase-activating protein 3 OS=Mus musculus (Mouse) OX=10090 GN=Iqgap3 PE=1 SV=1	0.997101	26.7533	0.00585055	34.264	18.72	34.264	0	0		NaN	0	0		NaN	0.98524	19.5869	0.017777	27.098	0	0		NaN	0.997101	26.7533	0.00585055	34.264	0.996689	26.2702	0.00697484	33.589	0	0		NaN	0.98524	19.5869	0.017777	27.098	0	0		NaN	0
P11881	1879	P11881	P11881	Inositol 1,4,5-trisphosphate receptor type 1	Itpr1	>sp|P11881|ITPR1_MOUSE Inositol 1,4,5-trisphosphate receptor type 1 OS=Mus musculus (Mouse) OX=10090 GN=Itpr1 PE=1 SV=2	0.492779	0	0.0199273	21.309	11.557	21.309	0	0		NaN	0	0		NaN					0	0		NaN									0	0		NaN					0.492779	0	0.0199273	21.309
P11881	1878	P11881	P11881	Inositol 1,4,5-trisphosphate receptor type 1	Itpr1	>sp|P11881|ITPR1_MOUSE Inositol 1,4,5-trisphosphate receptor type 1 OS=Mus musculus (Mouse) OX=10090 GN=Itpr1 PE=1 SV=2	0.492779	0	0.0199273	21.309	11.557	21.309	0	0		NaN	0	0		NaN					0	0		NaN									0	0		NaN					0.492779	0	0.0199273	21.309
D3YXK0	482	D3YXK0	D3YXK0		Jakmip2	>tr|D3YXK0|D3YXK0_MOUSE Janus kinase and microtubule-interacting protein 2 OS=Mus musculus (Mouse) OX=10090 GN=Jakmip2 PE=1 SV=2	0.55807	1.01335	0.0134241	42.718	30.798	42.718					0	0		NaN																	0.55807	1.01335	0.0134241	42.718	0	0		NaN
P05627	37	P05627	P05627	Transcription factor AP-1	Jun	>sp|P05627|JUN_MOUSE Transcription factor AP-1 OS=Mus musculus (Mouse) OX=10090 GN=Jun PE=1 SV=3	0.878289	8.53488	0.00821385	21.901	11.908	21.901					0	0		NaN	0	0		NaN									0	0		NaN
P05627	48	P05627	P05627	Transcription factor AP-1	Jun	>sp|P05627|JUN_MOUSE Transcription factor AP-1 OS=Mus musculus (Mouse) OX=10090 GN=Jun PE=1 SV=3	0.990308	19.5239	0.00821385	21.901	11.908	21.901					0	0		NaN	0	0		NaN									0	0		NaN
P15066	299	P15066	P15066	Transcription factor jun-D	Jund	>sp|P15066|JUND_MOUSE Transcription factor jun-D OS=Mus musculus (Mouse) OX=10090 GN=Jund PE=1 SV=1	0.440912	0.729621	0.0140806	25.987	17.703	25.987
P15066	306	P15066	P15066	Transcription factor jun-D	Jund	>sp|P15066|JUND_MOUSE Transcription factor jun-D OS=Mus musculus (Mouse) OX=10090 GN=Jund PE=1 SV=1	0.389772	0	0.0140806	25.987	17.703	25.987
P15066	309	P15066	P15066	Transcription factor jun-D	Jund	>sp|P15066|JUND_MOUSE Transcription factor jun-D OS=Mus musculus (Mouse) OX=10090 GN=Jund PE=1 SV=1	0.389772	0	0.0140806	25.987	17.703	25.987
P15066	302	P15066	P15066	Transcription factor jun-D	Jund	>sp|P15066|JUND_MOUSE Transcription factor jun-D OS=Mus musculus (Mouse) OX=10090 GN=Jund PE=1 SV=1	0.389772	0	0.0140806	25.987	17.703	25.987
P15066	307	P15066	P15066	Transcription factor jun-D	Jund	>sp|P15066|JUND_MOUSE Transcription factor jun-D OS=Mus musculus (Mouse) OX=10090 GN=Jund PE=1 SV=1	0.389772	0	0.0140806	25.987	17.703	25.987
Q8BJK1	131	Q8BJK1	Q8BJK1	BTB/POZ domain-containing protein KCTD7	Kctd7	>sp|Q8BJK1|KCTD7_MOUSE BTB/POZ domain-containing protein KCTD7 OS=Mus musculus (Mouse) OX=10090 GN=Kctd7 PE=1 SV=1	0.716339	4.03878	0.000450066	26.446	17.982	26.446																																	0.716339	4.03878	0.000450066	26.446
Q7TNC6	1815	Q7TNC6	Q7TNC6	Kinesin-like protein KIF26B	Kif26b	>sp|Q7TNC6|KI26B_MOUSE Kinesin-like protein KIF26B OS=Mus musculus (Mouse) OX=10090 GN=Kif26b PE=1 SV=3	0.954875	13.2553	0.0200494	20.838	11.038	20.838													0.954875	13.2553	0.0200494	20.838
Q8CG71	4	Q8CG71	Q8CG71	Prolyl 3-hydroxylase 2	Leprel1	>sp|Q8CG71|P3H2_MOUSE Prolyl 3-hydroxylase 2 OS=Mus musculus (Mouse) OX=10090 GN=P3h2 PE=1 SV=1	0.334079	0	0.00877149	26.837	13.214	26.837	0	0		NaN	0	0		NaN	0	0		NaN	0.334079	0	0.00877149	26.837					0	0		NaN					0	0		NaN	0	0		NaN
Q8CG71	8	Q8CG71	Q8CG71	Prolyl 3-hydroxylase 2	Leprel1	>sp|Q8CG71|P3H2_MOUSE Prolyl 3-hydroxylase 2 OS=Mus musculus (Mouse) OX=10090 GN=P3h2 PE=1 SV=1	0.334079	0	0.00877149	26.837	13.214	26.837	0	0		NaN	0	0		NaN	0	0		NaN	0.334079	0	0.00877149	26.837					0	0		NaN					0	0		NaN	0	0		NaN
Q8CG71	17	Q8CG71	Q8CG71	Prolyl 3-hydroxylase 2	Leprel1	>sp|Q8CG71|P3H2_MOUSE Prolyl 3-hydroxylase 2 OS=Mus musculus (Mouse) OX=10090 GN=P3h2 PE=1 SV=1	0.997762	26.492	0.00877149	26.837	13.214	26.837	0	0		NaN	0	0		NaN	0	0		NaN	0.997762	26.492	0.00877149	26.837					0	0		NaN					0	0		NaN	0	0		NaN
Q8CG71	5	Q8CG71	Q8CG71	Prolyl 3-hydroxylase 2	Leprel1	>sp|Q8CG71|P3H2_MOUSE Prolyl 3-hydroxylase 2 OS=Mus musculus (Mouse) OX=10090 GN=P3h2 PE=1 SV=1	0.334079	0	0.00877149	26.837	13.214	26.837	0	0		NaN	0	0		NaN	0	0		NaN	0.334079	0	0.00877149	26.837					0	0		NaN					0	0		NaN	0	0		NaN
P54310	476	P54310	P54310	Hormone-sensitive lipase	Lipe	>sp|P54310|LIPS_MOUSE Hormone-sensitive lipase OS=Mus musculus (Mouse) OX=10090 GN=Lipe PE=1 SV=2	1	22.0966	0.0173604	22.097	9.5789	22.097					1	22.0966	0.0173604	22.097					0	0		NaN	0	0		NaN					0	0		NaN	0	0		NaN	0	0		NaN
P54310	479	P54310	P54310	Hormone-sensitive lipase	Lipe	>sp|P54310|LIPS_MOUSE Hormone-sensitive lipase OS=Mus musculus (Mouse) OX=10090 GN=Lipe PE=1 SV=2	1	22.0966	0.0173604	22.097	9.5789	22.097					1	22.0966	0.0173604	22.097					0	0		NaN	0	0		NaN					0	0		NaN	0	0		NaN	0	0		NaN
P54310	467	P54310	P54310	Hormone-sensitive lipase	Lipe	>sp|P54310|LIPS_MOUSE Hormone-sensitive lipase OS=Mus musculus (Mouse) OX=10090 GN=Lipe PE=1 SV=2	1	22.0966	0.0173604	22.097	9.5789	22.097					1	22.0966	0.0173604	22.097					0	0		NaN	0	0		NaN					0	0		NaN	0	0		NaN	0	0		NaN
P21619	429	P21619	P21619	Lamin-B2	Lmnb2	>sp|P21619|LMNB2_MOUSE Lamin-B2 OS=Mus musculus (Mouse) OX=10090 GN=Lmnb2 PE=1 SV=2	0.441357	0.990919	0.0194354	30.083	16.682	30.083	0	0		NaN	0	0		NaN					0	0		NaN					0.441357	0.990919	0.0194354	30.083					0	0		NaN	0	0		NaN
P59383	245	P59383	P59383	Leucine-rich repeat neuronal protein 4	Lrrn4	>sp|P59383|LRRN4_MOUSE Leucine-rich repeat neuronal protein 4 OS=Mus musculus (Mouse) OX=10090 GN=Lrrn4 PE=1 SV=2	1	46.4619	0.00597983	46.462	15.898	46.462					1	28.9578	0.0686678	28.958					1	46.4619	0.00597983	46.462													1	37.3442	0.0197902	37.344
Q6A009	706	Q6A009	Q6A009	E3 ubiquitin-protein ligase listerin	Ltn1	>sp|Q6A009|LTN1_MOUSE E3 ubiquitin-protein ligase listerin OS=Mus musculus (Mouse) OX=10090 GN=Ltn1 PE=1 SV=3	1	30.8894	0.0113008	38.783	14.528	30.889													0	0		NaN	1	30.8894	0.0234875	30.889					1	38.7825	0.0113008	38.783									0
Q9QXZ0	3122	Q9QXZ0	Q9QXZ0	Microtubule-actin cross-linking factor 1	Macf1	>sp|Q9QXZ0|MACF1_MOUSE Microtubule-actin cross-linking factor 1 OS=Mus musculus (Mouse) OX=10090 GN=Macf1 PE=1 SV=2	0.940206	11.0167	0.00746504	25.448	10.657	25.448
Q9QXZ0	3113	Q9QXZ0	Q9QXZ0	Microtubule-actin cross-linking factor 1	Macf1	>sp|Q9QXZ0|MACF1_MOUSE Microtubule-actin cross-linking factor 1 OS=Mus musculus (Mouse) OX=10090 GN=Macf1 PE=1 SV=2	0.940206	11.0167	0.00746504	25.448	10.657	25.448
Q9QXZ0	3121	Q9QXZ0	Q9QXZ0	Microtubule-actin cross-linking factor 1	Macf1	>sp|Q9QXZ0|MACF1_MOUSE Microtubule-actin cross-linking factor 1 OS=Mus musculus (Mouse) OX=10090 GN=Macf1 PE=1 SV=2	0.940206	11.0167	0.00746504	25.448	10.657	25.448
Q9QXZ0	3119	Q9QXZ0	Q9QXZ0	Microtubule-actin cross-linking factor 1	Macf1	>sp|Q9QXZ0|MACF1_MOUSE Microtubule-actin cross-linking factor 1 OS=Mus musculus (Mouse) OX=10090 GN=Macf1 PE=1 SV=2	0.935049	10.6575	0.00746504	25.448	10.657	25.448
Q9QYR6	1634	Q9QYR6	Q9QYR6	Microtubule-associated protein 1A;MAP1A heavy chain;MAP1 light chain LC2	Map1a	>sp|Q9QYR6|MAP1A_MOUSE Microtubule-associated protein 1A OS=Mus musculus (Mouse) OX=10090 GN=Map1a PE=1 SV=2	0.333333	0	8.45842e-27	82.665	71.856	77.51	0.333333	0	8.45842e-27	82.665	0.333333	0	4.29686e-08	54.559	0.333333	0	1.15605e-08	59.893	0.333333	0	4.90602e-08	53.525	0.333325	0	0.00203669	42.885	0.333325	0	0.00203669	42.885	0.333322	0	0.00333032	41.818	0	0		NaN	0.333333	0	5.68525e-20	77.51	0.333333
Q9QYR6	1633	Q9QYR6	Q9QYR6	Microtubule-associated protein 1A;MAP1A heavy chain;MAP1 light chain LC2	Map1a	>sp|Q9QYR6|MAP1A_MOUSE Microtubule-associated protein 1A OS=Mus musculus (Mouse) OX=10090 GN=Map1a PE=1 SV=2	0.43028	1.79119	8.45842e-27	82.665	71.856	66.365	0.333333	0	8.45842e-27	82.665	0.333333	0	4.29686e-08	54.559	0.333333	0	1.15605e-08	59.893	0.333333	0	4.90602e-08	53.525	0.333325	0	0.00203669	42.885	0.333325	0	0.00203669	42.885	0.333322	0	0.00333032	41.818	0.43028	1.79119	1.82438e-13	66.365	0.333333	0	5.68525e-20	77.51	0.333333
Q9QYR6	1636	Q9QYR6	Q9QYR6	Microtubule-associated protein 1A;MAP1A heavy chain;MAP1 light chain LC2	Map1a	>sp|Q9QYR6|MAP1A_MOUSE Microtubule-associated protein 1A OS=Mus musculus (Mouse) OX=10090 GN=Map1a PE=1 SV=2	0.333333	0	8.45842e-27	82.665	71.856	77.51	0.333333	0	8.45842e-27	82.665	0.333333	0	4.29686e-08	54.559	0.333333	0	1.15605e-08	59.893	0.333333	0	4.90602e-08	53.525	0.333325	0	0.00203669	42.885	0.333325	0	0.00203669	42.885	0.333322	0	0.00333032	41.818	0	0		NaN	0.333333	0	5.68525e-20	77.51	0.333333
Q9QYR6	991	Q9QYR6	Q9QYR6	Microtubule-associated protein 1A;MAP1A heavy chain;MAP1 light chain LC2	Map1a	>sp|Q9QYR6|MAP1A_MOUSE Microtubule-associated protein 1A OS=Mus musculus (Mouse) OX=10090 GN=Map1a PE=1 SV=2	0.968909	19.4795	0.00125502	35.215	32.791	26.224	0	0		NaN	0	0		NaN	0.936581	15.9642	0.0336016	25.361	0	0		NaN					0	0		NaN	0.966016	18.5032	0.00125502	35.215	0	0		NaN	0.957352	17.3878	0.0133711	27.119	0
Q9QYR6	1580	Q9QYR6	Q9QYR6	Microtubule-associated protein 1A;MAP1A heavy chain;MAP1 light chain LC2	Map1a	>sp|Q9QYR6|MAP1A_MOUSE Microtubule-associated protein 1A OS=Mus musculus (Mouse) OX=10090 GN=Map1a PE=1 SV=2	0.99991	40.445	9.40711e-06	74.338	64.333	74.338	0.993549	21.8759	0.00291669	51.727	0	0		NaN	0.99707	25.3181	0.0193082	47.639	0.982079	17.3879	0.0395827	41.542	0.963434	14.2075	0.0238932	38.261	0	0		NaN	0.985845	18.429	0.0390699	42.947	0	0		NaN	0.995822	23.7717	0.014554	49.595	0
P14873	2030	P14873	P14873	Microtubule-associated protein 1B;MAP1B heavy chain;MAP1 light chain LC1	Map1b	>sp|P14873|MAP1B_MOUSE Microtubule-associated protein 1B OS=Mus musculus (Mouse) OX=10090 GN=Map1b PE=1 SV=2	0.301768	0	0.00322006	42.633	31.866	33.083	0	0		NaN	0	0		NaN	0.300119	0	0.0156262	34.748	0	0		NaN	0	0		NaN	0	0		NaN	0	0		NaN	0	0		NaN	0.267657	0	0.00322006	42.633	0
P14873	2028	P14873	P14873	Microtubule-associated protein 1B;MAP1B heavy chain;MAP1 light chain LC1	Map1b	>sp|P14873|MAP1B_MOUSE Microtubule-associated protein 1B OS=Mus musculus (Mouse) OX=10090 GN=Map1b PE=1 SV=2	0.301768	0	0.00322006	42.633	31.866	33.083	0	0		NaN	0	0		NaN	0.300119	0	0.0156262	34.748	0	0		NaN	0	0		NaN	0	0		NaN	0	0		NaN	0	0		NaN	0.267657	0	0.00322006	42.633	0
P14873	2027	P14873	P14873	Microtubule-associated protein 1B;MAP1B heavy chain;MAP1 light chain LC1	Map1b	>sp|P14873|MAP1B_MOUSE Microtubule-associated protein 1B OS=Mus musculus (Mouse) OX=10090 GN=Map1b PE=1 SV=2	0.301768	0	0.00322006	42.633	31.866	33.083	0	0		NaN	0	0		NaN	0.300119	0	0.0156262	34.748	0	0		NaN	0	0		NaN	0	0		NaN	0	0		NaN	0	0		NaN	0.267657	0	0.00322006	42.633	0
P14873	1307	P14873	P14873	Microtubule-associated protein 1B;MAP1B heavy chain;MAP1 light chain LC1	Map1b	>sp|P14873|MAP1B_MOUSE Microtubule-associated protein 1B OS=Mus musculus (Mouse) OX=10090 GN=Map1b PE=1 SV=2	0.999969	46.4445	2.31223e-07	57.21	54.327	57.21	0.999334	33.992	0.00220672	40.92	0	0		NaN	0	0		NaN	0	0		NaN	0.998888	32.7039	0.00442808	37.118	0	0		NaN	0	0		NaN	0	0		NaN	0	0		NaN	0
P14873	1815	P14873	P14873	Microtubule-associated protein 1B;MAP1B heavy chain;MAP1 light chain LC1	Map1b	>sp|P14873|MAP1B_MOUSE Microtubule-associated protein 1B OS=Mus musculus (Mouse) OX=10090 GN=Map1b PE=1 SV=2	0.688219	3.95255	2.29677e-43	94.259	89.459	65.064	0.477655	0	2.18056e-23	73.831	0.471974	0	4.1676e-16	66.401	0.432189	0	8.22513e-07	50.271	0.688219	3.95255	5.50646e-16	65.064	0.473592	0	5.50547e-11	60.517	0.486966	0	2.29677e-43	94.259	0.437563	0	0.0340147	25.327	0.431189	0	2.12218e-16	68.445	0.4759	0	7.83649e-16	62.735	0.429784
P14873	1775	P14873	P14873	Microtubule-associated protein 1B;MAP1B heavy chain;MAP1 light chain LC1	Map1b	>sp|P14873|MAP1B_MOUSE Microtubule-associated protein 1B OS=Mus musculus (Mouse) OX=10090 GN=Map1b PE=1 SV=2	1	80.2079	2.23098e-27	147.64	99.071	113.47	1	79.6056	1.93849e-08	106.38	0	0		NaN	1	80.5338	1.49212e-10	118.19	1	108.644	2.23098e-27	147.64	1	80.2079	1.86456e-09	113.47	0.999977	46.4708	0.00554373	63.682	0.999995	53.3851	2.71654e-07	92.38	1	63.4077	8.34635e-07	96.673	1	67.342	2.11818e-09	105	0
P14873	1814	P14873	P14873	Microtubule-associated protein 1B;MAP1B heavy chain;MAP1 light chain LC1	Map1b	>sp|P14873|MAP1B_MOUSE Microtubule-associated protein 1B OS=Mus musculus (Mouse) OX=10090 GN=Map1b PE=1 SV=2	0.534671	4.07693	2.29677e-43	94.259	89.459	30.595	0.477655	0	2.18056e-23	73.831	0.471974	0	4.1676e-16	66.401	0.432189	0	8.22513e-07	50.271	0.534671	4.07693	0.00816814	30.595	0.473592	0	5.50547e-11	60.517	0.486966	0	2.29677e-43	94.259	0.532454	1.98464	5.09555e-33	86.141	0.431189	0	2.12218e-16	68.445	0.4759	0	3.25088e-23	71.159	0.429784
P14873	1391	P14873	P14873	Microtubule-associated protein 1B;MAP1B heavy chain;MAP1 light chain LC1	Map1b	>sp|P14873|MAP1B_MOUSE Microtubule-associated protein 1B OS=Mus musculus (Mouse) OX=10090 GN=Map1b PE=1 SV=2	0.599491	1.75604	8.98655e-24	72.474	67.354	72.474																	0.533763	0.591568	8.98655e-24	72.474									0.599491	1.75604	8.98655e-24	72.474	0	0		NaN	0
P20357	1485	P20357	P20357	Microtubule-associated protein 2	Map2	>sp|P20357|MTAP2_MOUSE Microtubule-associated protein 2 OS=Mus musculus (Mouse) OX=10090 GN=Map2 PE=1 SV=2	0.693074	5.78743	0.0115883	39.629	22.156	39.629
P10637	470	P10637	P10637	Microtubule-associated protein tau	Mapt	>sp|P10637|TAU_MOUSE Microtubule-associated protein tau OS=Mus musculus (Mouse) OX=10090 GN=Mapt PE=1 SV=3	0.474327	0	0.00014848	45.347	43.987	36.207									0.430101	0	0.0194018	28.333	0.466004	0	0.00565895	35.159	0	0		NaN	0	0		NaN	0	0		NaN	0.474327	0	0.004278	36.207	0.470175	0	0.00014848	45.347	0
P10637	494	P10637	P10637	Microtubule-associated protein tau	Mapt	>sp|P10637|TAU_MOUSE Microtubule-associated protein tau OS=Mus musculus (Mouse) OX=10090 GN=Mapt PE=1 SV=3	0.994904	26.6808	5.27747e-14	94.325	86.609	94.325	0.945089	13.7046	0.00133923	69.612	0.994904	26.6808	5.27747e-14	94.325	0	0		NaN	0.956865	17.1346	1.27097e-05	77.899	0.977061	17.5557	8.61812e-09	81.854	0	0		NaN	0.721698	5.2981	0.0305434	60.062	0.969172	16.3462	0.000676344	70.114	0.959613	16.1506	0.00620537	65.924	0.91605
P10637	473	P10637	P10637	Microtubule-associated protein tau	Mapt	>sp|P10637|TAU_MOUSE Microtubule-associated protein tau OS=Mus musculus (Mouse) OX=10090 GN=Mapt PE=1 SV=3	0.875134	9.54168	0.00014848	45.347	43.987	41.166	0.564972	2.24842	0.0361037	24.833					0.430101	0	0.0194018	28.333	0.466004	0	0.00565895	35.159	0	0		NaN	0	0		NaN	0	0		NaN	0.474327	0	0.004278	36.207	0.470175	0	0.00014848	45.347	0
Q8CIP4	438	Q8CIP4	Q8CIP4	MAP/microtubule affinity-regulating kinase 4	Mark4	>sp|Q8CIP4|MARK4_MOUSE MAP/microtubule affinity-regulating kinase 4 OS=Mus musculus (Mouse) OX=10090 GN=Mark4 PE=1 SV=1	0.592466	6.44862	0.00952742	40.493	32.151	36.029									0.587195	6.34496	0.0108341	40.493	0.592466	6.44862	0.00952742	36.029					0	0		NaN
Q8K310	598	Q8K310	Q8K310	Matrin-3	Matr3	>sp|Q8K310|MATR3_MOUSE Matrin-3 OS=Mus musculus (Mouse) OX=10090 GN=Matr3 PE=1 SV=1	0.998356	30.3691	2.85114e-10	91.306	83.262	91.306	0.965439	17.0242	1.55952e-09	86.944	0.941637	14.7826	0.0019285	55.724	0.998356	30.3691	2.85114e-10	91.306	0.993286	24.2659	3.8067e-10	89.484	0.946408	15.0109	2.41646e-06	73.279	0.996012	26.6519	2.14601e-06	73.953	0.989603	22.4778	0.000111265	67.685	0.945591	15.1122	0.00176805	56.339	0.970161	17.8456	0.000269314	63.46	0.913256
Q9D5Y0	432	Q9D5Y0	Q9D5Y0	Uncharacterized protein C7orf31 homolog	MGI:1918071	>sp|Q9D5Y0|CG031_MOUSE Uncharacterized protein C7orf31 homolog OS=Mus musculus (Mouse) OX=10090 GN=MGI:1918071 PE=2 SV=1	0.366339	0.637806	0.0200429	32.933	20.875	32.933									0	0		NaN	0	0		NaN	0.366339	0.637806	0.0200429	32.933	0	0		NaN									0	0		NaN	0
Q2VPU4	9	Q2VPU4	Q2VPU4	MLX-interacting protein	Mlxip	>sp|Q2VPU4|MLXIP_MOUSE MLX-interacting protein OS=Mus musculus (Mouse) OX=10090 GN=Mlxip PE=1 SV=1	1	34.9603	0.0152951	42.031	24.015	34.96									1	34.9603	0.0439216	34.96					0	0		NaN
P34960	55	P34960	P34960	Macrophage metalloelastase	Mmp12	>sp|P34960|MMP12_MOUSE Macrophage metalloelastase OS=Mus musculus (Mouse) OX=10090 GN=Mmp12 PE=1 SV=3	0.959901	13.6056	0.0159607	29.743	13.366	29.743													0.959901	13.6056	0.0159607	29.743																	0	0		NaN
P34960	57	P34960	P34960	Macrophage metalloelastase	Mmp12	>sp|P34960|MMP12_MOUSE Macrophage metalloelastase OS=Mus musculus (Mouse) OX=10090 GN=Mmp12 PE=1 SV=3	0.959901	13.6056	0.0159607	29.743	13.366	29.743													0.959901	13.6056	0.0159607	29.743																	0	0		NaN
Q99MV5	1131	Q99MV5	Q99MV5	Putative helicase Mov10l1	Mov10l1	>sp|Q99MV5|M10L1_MOUSE RNA helicase Mov10l1 OS=Mus musculus (Mouse) OX=10090 GN=Mov10l1 PE=1 SV=1	0.818257	6.53644	0.0110521	39.625	7.917	39.625	0.818257	6.53644	0.0110521	39.625	0	0		NaN					0	0		NaN	0	0		NaN	0	0		NaN	0.803307	6.12323	0.037046	31.597	0	0		NaN	0	0		NaN
Q9D6Y7	26	Q9D6Y7	Q9D6Y7	Mitochondrial peptide methionine sulfoxide reductase	Msra	>sp|Q9D6Y7|MSRA_MOUSE Mitochondrial peptide methionine sulfoxide reductase OS=Mus musculus (Mouse) OX=10090 GN=Msra PE=1 SV=1	0.441404	0	0.0198145	30.945	11.253	30.945	0	0		NaN	0	0		NaN	0	0		NaN	0	0		NaN					0	0		NaN					0.441404	0	0.0198145	30.945
Q9D6Y7	24	Q9D6Y7	Q9D6Y7	Mitochondrial peptide methionine sulfoxide reductase	Msra	>sp|Q9D6Y7|MSRA_MOUSE Mitochondrial peptide methionine sulfoxide reductase OS=Mus musculus (Mouse) OX=10090 GN=Msra PE=1 SV=1	0.441404	0	0.0198145	30.945	11.253	30.945	0	0		NaN	0	0		NaN	0	0		NaN	0	0		NaN					0	0		NaN					0.441404	0	0.0198145	30.945
Q8BKY8	364	Q8BKY8	Q8BKY8	Transcription termination factor 2, mitochondrial	Mterf2	>sp|Q8BKY8|MTEF2_MOUSE Transcription termination factor 2, mitochondrial OS=Mus musculus (Mouse) OX=10090 GN=Mterf2 PE=1 SV=1	1	23.7112	0.0225713	23.711	6.938	23.711					1	23.7112	0.0225713	23.711
Q6DID5	650	Q6DID5	Q6DID5	PWWP domain-containing protein MUM1	Mum1	>sp|Q6DID5|PWP3A_MOUSE PWWP domain-containing DNA repair factor 3A OS=Mus musculus (Mouse) OX=10090 GN=Pwwp3a PE=1 SV=1	0.570102	0.465139	0.0111414	23.456	7.9419	23.456
Q6DID5	660	Q6DID5	Q6DID5	PWWP domain-containing protein MUM1	Mum1	>sp|Q6DID5|PWP3A_MOUSE PWWP domain-containing DNA repair factor 3A OS=Mus musculus (Mouse) OX=10090 GN=Pwwp3a PE=1 SV=1	0.79563	5.44081	0.0111414	23.456	7.9419	23.456
Q02566;Q91Z83	1720;1718	Q02566	Q02566	Myosin-6;Myosin-7	Myh6;Myh7	>sp|Q02566|MYH6_MOUSE Myosin-6 OS=Mus musculus (Mouse) OX=10090 GN=Myh6 PE=1 SV=2;>sp|Q91Z83|MYH7_MOUSE Myosin-7 OS=Mus musculus (Mouse) OX=10090 GN=Myh7 PE=2 SV=1	0.334259	0	0.00268695	22.971	15.685	22.971					0	0		NaN													0	0		NaN									0.334259	0	0.00268695	22.971	0
Q02566;Q91Z83	1724;1722	Q02566	Q02566	Myosin-6;Myosin-7	Myh6;Myh7	>sp|Q02566|MYH6_MOUSE Myosin-6 OS=Mus musculus (Mouse) OX=10090 GN=Myh6 PE=1 SV=2;>sp|Q91Z83|MYH7_MOUSE Myosin-7 OS=Mus musculus (Mouse) OX=10090 GN=Myh7 PE=2 SV=1	0.409829	0	0.000117165	31.978	19.566	31.978					0	0		NaN					0.409829	0	0.000117165	31.978					0	0		NaN									0.334285	0	0.00268695	22.971	0
Q02566;Q91Z83	1723;1721	Q02566	Q02566	Myosin-6;Myosin-7	Myh6;Myh7	>sp|Q02566|MYH6_MOUSE Myosin-6 OS=Mus musculus (Mouse) OX=10090 GN=Myh6 PE=1 SV=2;>sp|Q91Z83|MYH7_MOUSE Myosin-7 OS=Mus musculus (Mouse) OX=10090 GN=Myh7 PE=2 SV=1	0.40983	0	0.000117165	31.978	19.566	31.978					0	0		NaN					0.40983	0	0.000117165	31.978					0	0		NaN									0.334298	0	0.00268695	22.971	0
Q02566;Q91Z83	1711;1709	Q02566	Q02566	Myosin-6;Myosin-7	Myh6;Myh7	>sp|Q02566|MYH6_MOUSE Myosin-6 OS=Mus musculus (Mouse) OX=10090 GN=Myh6 PE=1 SV=2;>sp|Q91Z83|MYH7_MOUSE Myosin-7 OS=Mus musculus (Mouse) OX=10090 GN=Myh7 PE=2 SV=1	0.499975	0	0.000117165	31.978	19.566	31.978					0	0		NaN					0.499975	0	0.000117165	31.978					0	0		NaN									0.498579	0	0.00268695	22.971	0
Q02566;Q91Z83	1712;1710	Q02566	Q02566	Myosin-6;Myosin-7	Myh6;Myh7	>sp|Q02566|MYH6_MOUSE Myosin-6 OS=Mus musculus (Mouse) OX=10090 GN=Myh6 PE=1 SV=2;>sp|Q91Z83|MYH7_MOUSE Myosin-7 OS=Mus musculus (Mouse) OX=10090 GN=Myh7 PE=2 SV=1	0.499975	0	0.000117165	31.978	19.566	31.978					0	0		NaN					0.499975	0	0.000117165	31.978					0	0		NaN									0.498579	0	0.00268695	22.971	0
Q99104	1100	Q99104	Q99104	Unconventional myosin-Va	Myo5a	>sp|Q99104|MYO5A_MOUSE Unconventional myosin-Va OS=Mus musculus (Mouse) OX=10090 GN=Myo5a PE=1 SV=2	0.992841	21.4203	0.00729917	21.42	13.506	21.42					0	0		NaN	0	0		NaN	0	0		NaN	0.992841	21.4203	0.00729917	21.42	0	0		NaN	0	0		NaN	0	0		NaN	0	0		NaN	0
Q794H2	415	Q794H2	Q794H2	Nucleosome assembly protein 1-like 3	Nap1l3	>sp|Q794H2|NP1L3_MOUSE Nucleosome assembly protein 1-like 3 OS=Mus musculus (Mouse) OX=10090 GN=Nap1l3 PE=2 SV=1	1	31.5969	0.016686	31.597	12.465	31.597	0	0		NaN																					0	0		NaN
Q794H2	414	Q794H2	Q794H2	Nucleosome assembly protein 1-like 3	Nap1l3	>sp|Q794H2|NP1L3_MOUSE Nucleosome assembly protein 1-like 3 OS=Mus musculus (Mouse) OX=10090 GN=Nap1l3 PE=2 SV=1	1	31.5969	0.016686	31.597	12.465	31.597	0	0		NaN																					0	0		NaN
P13595	1005	P13595	P13595	Neural cell adhesion molecule 1	Ncam1	>sp|P13595|NCAM1_MOUSE Neural cell adhesion molecule 1 OS=Mus musculus (Mouse) OX=10090 GN=Ncam1 PE=1 SV=3	0.999323	31.6909	2.91052e-05	83.404	75.096	71.601	0.995696	23.6429	3.53216e-05	81.346	0.996859	25.0163	0.0250806	60.489	0	0		NaN	0.99813	27.2743	0.00046393	74.147	0.992877	21.4423	2.91052e-05	83.404	0	0		NaN	0.946301	12.4607	0.0131169	62.055	0.994202	22.3422	0.000666673	71.685	0.986561	18.6574	0.00989359	64.275	0.977216
P13595	774	P13595	P13595	Neural cell adhesion molecule 1	Ncam1	>sp|P13595|NCAM1_MOUSE Neural cell adhesion molecule 1 OS=Mus musculus (Mouse) OX=10090 GN=Ncam1 PE=1 SV=3	0.917964	10.4882	2.25866e-05	63.302	56.469	63.302	0.701472	3.71025	0.00907014	37.884	0.663534	2.94922	0.0286349	32.121	0.733667	4.40075	0.00282585	47.726	0.917964	10.4882	2.25866e-05	63.302					0	0		NaN	0	0		NaN	0.756182	4.91561	0.00373481	45.347	0	0		NaN	0
P13595	770	P13595	P13595	Neural cell adhesion molecule 1	Ncam1	>sp|P13595|NCAM1_MOUSE Neural cell adhesion molecule 1 OS=Mus musculus (Mouse) OX=10090 GN=Ncam1 PE=1 SV=3	0.603294	1.82061	0.00307213	47.082	41.441	34.174																	0.553102	0.925966	0.0184293	34.174	0	0		NaN	0	0		NaN					0	0		NaN	0
P19246	571	P19246	P19246	Neurofilament heavy polypeptide	Nefh	>sp|P19246|NFH_MOUSE Neurofilament heavy polypeptide OS=Mus musculus (Mouse) OX=10090 GN=Nefh PE=1 SV=3	1	108.514	1.82661e-48	166.3	52.774	166.3	0	0		NaN	0	0		NaN	1	63.7284	2.5205e-07	102.39	0.999959	43.901	0.0126308	57.414	0.999996	53.8961	0.000982676	75.316	0.999951	43.0619	0.00088915	75.764	0.999929	41.4767	0.00574693	63.29	0.999727	35.6413	0.0248614	52.527	0.99996	44.0205	0.00829572	60.55
P19246	595	P19246	P19246	Neurofilament heavy polypeptide	Nefh	>sp|P19246|NFH_MOUSE Neurofilament heavy polypeptide OS=Mus musculus (Mouse) OX=10090 GN=Nefh PE=1 SV=3	0.908107	10.8859	0.00223647	43.841	35.044	43.841	0	0		NaN	0	0		NaN	0	0		NaN	0	0		NaN	0.660546	3.94352	0.0347362	27.838	0.695179	4.15574	0.0191672	32.511	0.908107	10.8859	0.00223647	43.841	0	0		NaN	0	0		NaN
P19246	834	P19246	P19246	Neurofilament heavy polypeptide	Nefh	>sp|P19246|NFH_MOUSE Neurofilament heavy polypeptide OS=Mus musculus (Mouse) OX=10090 GN=Nefh PE=1 SV=3	0.994836	22.8479	0.00416585	36.431	31.3	36.431	0	0		NaN	0	0		NaN	0	0		NaN	0	0		NaN	0.994836	22.8479	0.00416585	36.431	0	0		NaN	0	0		NaN					0	0		NaN
P19246	637	P19246	P19246	Neurofilament heavy polypeptide	Nefh	>sp|P19246|NFH_MOUSE Neurofilament heavy polypeptide OS=Mus musculus (Mouse) OX=10090 GN=Nefh PE=1 SV=3	0.958178	13.6008	0.00309132	68.413	43.483	68.413	0	0		NaN									0	0		NaN	0.958178	13.6008	0.00309132	68.413					0	0		NaN
P19246	733	P19246	P19246	Neurofilament heavy polypeptide	Nefh	>sp|P19246|NFH_MOUSE Neurofilament heavy polypeptide OS=Mus musculus (Mouse) OX=10090 GN=Nefh PE=1 SV=3	0.999982	47.3748	0.00744487	61.165	14.638	61.165													0	0		NaN					0.999982	47.3748	0.00744487	61.165	0	0		NaN					0	0		NaN
Q91YP2	665	Q91YP2	Q91YP2	Neurolysin, mitochondrial	Nln	>sp|Q91YP2|NEUL_MOUSE Neurolysin, mitochondrial OS=Mus musculus (Mouse) OX=10090 GN=Nln PE=1 SV=1	1	46.1209	0.000149814	46.121	12.574	46.121																					1	46.1209	0.000149814	46.121
P20181	2	P20181	P20181	Neurotrophin-3	Ntf3	>sp|P20181|NTF3_MOUSE Neurotrophin-3 OS=Mus musculus (Mouse) OX=10090 GN=Ntf3 PE=1 SV=1	0.99539	23.3226	0.0127403	25.982	9.9672	25.982					0	0		NaN					0.99539	23.3226	0.0127403	25.982	0	0		NaN	0	0		NaN	0	0		NaN
P20181	6	P20181	P20181	Neurotrophin-3	Ntf3	>sp|P20181|NTF3_MOUSE Neurotrophin-3 OS=Mus musculus (Mouse) OX=10090 GN=Ntf3 PE=1 SV=1	0.995284	23.2239	0.0127403	25.982	9.9672	25.982					0	0		NaN					0.995284	23.2239	0.0127403	25.982	0	0		NaN	0	0		NaN	0	0		NaN
Q7M750	90	Q7M750	Q7M750	Opalin	Opalin	>sp|Q7M750|OPALI_MOUSE Opalin OS=Mus musculus (Mouse) OX=10090 GN=Opalin PE=1 SV=1	0.850539	9.24593	0.000219386	53.453	46.036	40.384	0.59497	4.28688	0.0145605	28.14	0	0		NaN	0.850539	9.24593	0.00215506	40.384	0	0		NaN	0.762938	7.37443	0.000219386	53.453	0	0		NaN	0	0		NaN	0.709775	4.39996	0.00210229	40.614	0.82922	9.40874	0.00189275	41.53	0
Q9QYX7	1454	Q9QYX7	Q9QYX7	Protein piccolo	Pclo	>sp|Q9QYX7|PCLO_MOUSE Protein piccolo OS=Mus musculus (Mouse) OX=10090 GN=Pclo PE=1 SV=4	0.45387	0	0.00452959	26.742	19.469	26.742					0	0		NaN									0	0		NaN	0	0		NaN	0	0		NaN					0	0		NaN
Q9R0L6	150	Q9R0L6	Q9R0L6	Pericentriolar material 1 protein	Pcm1	>sp|Q9R0L6|PCM1_MOUSE Pericentriolar material 1 protein OS=Mus musculus (Mouse) OX=10090 GN=Pcm1 PE=1 SV=2	1	24.3535	0.0192319	24.918	13.543	24.353	0	0		NaN					1	24.9178	0.0192319	24.918	1	24.3535	0.0210354	24.353					0	0		NaN	0	0		NaN					0	0		NaN	0
P35486	295	P35486	P35486	Pyruvate dehydrogenase E1 component subunit alpha, somatic form, mitochondrial	Pdha1	>sp|P35486|ODPA_MOUSE Pyruvate dehydrogenase E1 component subunit alpha, somatic form, mitochondrial OS=Mus musculus (Mouse) OX=10090 GN=Pdha1 PE=1 SV=1	0.493951	0.0568246	0.00917849	47.548	41.07	47.548					0.493951	0.0568246	0.00917849	47.548	0	0		NaN	0	0		NaN	0	0		NaN	0	0		NaN	0	0		NaN	0	0		NaN	0	0		NaN	0
P12382	12	P12382	P12382	ATP-dependent 6-phosphofructokinase, liver type	Pfkl	>sp|P12382|PFKAL_MOUSE ATP-dependent 6-phosphofructokinase, liver type OS=Mus musculus (Mouse) OX=10090 GN=Pfkl PE=1 SV=4	0.997572	28.0436	0.000390058	37.118	15.876	37.118					0	0		NaN	0	0		NaN	0	0		NaN	0	0		NaN	0.943974	15.276	0.0163406	28.091	0	0		NaN	0	0		NaN	0	0		NaN	0
A6H619	408	A6H619	A6H619	PHD and RING finger domain-containing protein 1	Phrf1	>sp|A6H619|PHRF1_MOUSE PHD and RING finger domain-containing protein 1 OS=Mus musculus (Mouse) OX=10090 GN=Phrf1 PE=1 SV=2	0.48392	0	0.00362896	27.098	16.152	27.098	0	0		NaN	0	0		NaN	0	0		NaN					0	0		NaN					0	0		NaN	0	0		NaN	0	0		NaN	0
A6H619	409	A6H619	A6H619	PHD and RING finger domain-containing protein 1	Phrf1	>sp|A6H619|PHRF1_MOUSE PHD and RING finger domain-containing protein 1 OS=Mus musculus (Mouse) OX=10090 GN=Phrf1 PE=1 SV=2	0.484104	0	0.00362896	27.098	16.152	27.098	0	0		NaN	0	0		NaN	0	0		NaN					0	0		NaN					0	0		NaN	0	0		NaN	0	0		NaN	0
A6H619	414	A6H619	A6H619	PHD and RING finger domain-containing protein 1	Phrf1	>sp|A6H619|PHRF1_MOUSE PHD and RING finger domain-containing protein 1 OS=Mus musculus (Mouse) OX=10090 GN=Phrf1 PE=1 SV=2	0.98949	20.1479	0.00362896	27.098	16.152	27.098	0	0		NaN	0	0		NaN	0	0		NaN					0	0		NaN					0	0		NaN	0	0		NaN	0	0		NaN	0
Q68FH0	335	Q68FH0	Q68FH0	Plakophilin-4	Pkp4	>sp|Q68FH0|PKP4_MOUSE Plakophilin-4 OS=Mus musculus (Mouse) OX=10090 GN=Pkp4 PE=1 SV=1	0.421719	0	0.00115303	40.968	29.385	28.748	0.297602	0	0.0248874	24.793	0.329737	0	0.0193099	25.586	0.375787	0	0.00170435	36.744					0	0		NaN					0.332704	0	0.00115303	40.968	0.421719	0	0.00778648	28.748	0	0		NaN	0
Q68FH0	334	Q68FH0	Q68FH0	Plakophilin-4	Pkp4	>sp|Q68FH0|PKP4_MOUSE Plakophilin-4 OS=Mus musculus (Mouse) OX=10090 GN=Pkp4 PE=1 SV=1	0.421719	0	0.00115303	40.968	29.385	28.748	0.297602	0	0.0248874	24.793	0.329737	0	0.0193099	25.586	0.375787	0	0.00170435	36.744					0	0		NaN					0.332704	0	0.00115303	40.968	0.421719	0	0.00778648	28.748	0	0		NaN	0
Q68FH0	336	Q68FH0	Q68FH0	Plakophilin-4	Pkp4	>sp|Q68FH0|PKP4_MOUSE Plakophilin-4 OS=Mus musculus (Mouse) OX=10090 GN=Pkp4 PE=1 SV=1	0.589472	4.20284	0.00115303	40.968	29.385	38.377	0.297602	0	0.0248874	24.793	0.329737	0	0.0193099	25.586					0.589472	4.20284	0.00149127	38.377	0	0		NaN	0.46101	2.49867	0.0228448	25.083	0.332704	0	0.00115303	40.968					0	0		NaN	0
Q9QXS1	1443	Q9QXS1	Q9QXS1	Plectin	Plec	>sp|Q9QXS1|PLEC_MOUSE Plectin OS=Mus musculus (Mouse) OX=10090 GN=Plec PE=1 SV=3	1	33.8723	0.00352092	68.972	57.259	33.872	1	32.3659	0.0242565	62.287	0	0		NaN	1	44.5108	0.00352092	68.972	1	36.0287	0.0128627	36.029	1	33.8723	0.0195705	33.872	0	0		NaN	1	39.91	0.00606309	57.414	0	0		NaN	1	39.3382	0.0165053	39.338	0
Q3TWH3	196	Q3TWH3	Q3TWH3		Pnrc1	>tr|Q3TWH3|Q3TWH3_MOUSE Proline-rich nuclear receptor coactivator 1 OS=Mus musculus (Mouse) OX=10090 GN=Pnrc1 PE=1 SV=1	0.757124	5.2316	0.0205557	29.303	10.726	29.303	0	0		NaN	0	0		NaN	0	0		NaN	0	0		NaN					0.711666	4.18638	0.0633278	25.194	0	0		NaN	0	0		NaN	0.757124	5.2316	0.0205557	29.303	0
Q9WVF7	1562	Q9WVF7	Q9WVF7	DNA polymerase epsilon catalytic subunit A	Pole	>sp|Q9WVF7|DPOE1_MOUSE DNA polymerase epsilon catalytic subunit A OS=Mus musculus (Mouse) OX=10090 GN=Pole PE=1 SV=3	1	27.2629	0.00536135	40.278	21.034	27.263	0	0		NaN	0	0		NaN	1	27.5795	0.039994	27.58	0	0		NaN	1	27.2629	0.0412254	27.263	0	0		NaN	0	0		NaN	0	0		NaN	0	0		NaN	0
Q9WVF7	1574	Q9WVF7	Q9WVF7	DNA polymerase epsilon catalytic subunit A	Pole	>sp|Q9WVF7|DPOE1_MOUSE DNA polymerase epsilon catalytic subunit A OS=Mus musculus (Mouse) OX=10090 GN=Pole PE=1 SV=3	1	27.2629	0.00536135	40.278	21.034	27.263	0	0		NaN	0	0		NaN	1	27.5795	0.039994	27.58	0	0		NaN	1	27.2629	0.0412254	27.263	0	0		NaN	0	0		NaN	0	0		NaN	0	0		NaN	0
Q8CGS6	1572	Q8CGS6	Q8CGS6		Polq	>sp|Q8CGS6|DPOLQ_MOUSE DNA polymerase theta OS=Mus musculus (Mouse) OX=10090 GN=Polq PE=1 SV=2	1	45.4329	0.00950959	45.433	8.0887	45.433	0	0		NaN					0	0		NaN	0	0		NaN	0	0		NaN	0	0		NaN	0	0		NaN					0	0		NaN
P17742;V9GX31	5;13	P17742	P17742	Peptidyl-prolyl cis-trans isomerase A;Peptidyl-prolyl cis-trans isomerase A, N-terminally processed	Ppia;Gm12728	>sp|P17742|PPIA_MOUSE Peptidyl-prolyl cis-trans isomerase A OS=Mus musculus (Mouse) OX=10090 GN=Ppia PE=1 SV=2;>tr|V9GX31|V9GX31_MOUSE Peptidyl-prolyl cis-trans isomerase OS=Mus musculus (Mouse) OX=10090 GN=Gm12728 PE=1 SV=1	0.989859	19.895	0.000224694	53.255	43.259	53.255	0	0		NaN	0	0		NaN	0	0		NaN	0	0		NaN					0	0		NaN					0.989859	19.895	0.000224694	53.255	0	0		NaN
Q8K2V1	150	Q8K2V1	Q8K2V1	Serine/threonine-protein phosphatase 4 regulatory subunit 1	Ppp4r1	>sp|Q8K2V1|PP4R1_MOUSE Serine/threonine-protein phosphatase 4 regulatory subunit 1 OS=Mus musculus (Mouse) OX=10090 GN=Ppp4r1 PE=1 SV=2	0.5	0	0.00563423	34.395	15.46	26.548	0	0		NaN	0	0		NaN					0	0		NaN	0	0		NaN	0	0		NaN	0.5	0	0.00884469	32.191	0.5	0	0.0474071	24.115	0.5	0	0.00563423	34.395	0
Q8K2V1	151	Q8K2V1	Q8K2V1	Serine/threonine-protein phosphatase 4 regulatory subunit 1	Ppp4r1	>sp|Q8K2V1|PP4R1_MOUSE Serine/threonine-protein phosphatase 4 regulatory subunit 1 OS=Mus musculus (Mouse) OX=10090 GN=Ppp4r1 PE=1 SV=2	0.5	0	0.00563423	34.395	15.46	26.548	0	0		NaN	0	0		NaN					0	0		NaN	0	0		NaN	0	0		NaN	0.5	0	0.00884469	32.191	0.5	0	0.0474071	24.115	0.5	0	0.00563423	34.395	0
P63318	514	P63318	P63318	Protein kinase C gamma type	Prkcg	>sp|P63318|KPCG_MOUSE Protein kinase C gamma type OS=Mus musculus (Mouse) OX=10090 GN=Prkcg PE=1 SV=1	0.32039	0	0.00430217	39.682	37.962	39.682																													0	0		NaN					0
P63318	518	P63318	P63318	Protein kinase C gamma type	Prkcg	>sp|P63318|KPCG_MOUSE Protein kinase C gamma type OS=Mus musculus (Mouse) OX=10090 GN=Prkcg PE=1 SV=1	0.32039	0	0.00430217	39.682	37.962	39.682																													0	0		NaN					0
Q2PFD7	1000	Q2PFD7	Q2PFD7	PH and SEC7 domain-containing protein 3	Psd3	>sp|Q2PFD7|PSD3_MOUSE PH and SEC7 domain-containing protein 3 OS=Mus musculus (Mouse) OX=10090 GN=Psd3 PE=1 SV=2	0.415038	0.553904	0.0122184	38.379	31.605	38.379	0.415038	0.553904	0.0122184	38.379	0	0		NaN	0.349446	0.438067	0.0477171	30.869	0	0		NaN	0	0		NaN	0	0		NaN	0	0		NaN	0	0		NaN	0	0		NaN	0
Q2PFD7	1001	Q2PFD7	Q2PFD7	PH and SEC7 domain-containing protein 3	Psd3	>sp|Q2PFD7|PSD3_MOUSE PH and SEC7 domain-containing protein 3 OS=Mus musculus (Mouse) OX=10090 GN=Psd3 PE=1 SV=2	0.964164	14.4838	6.26779e-24	100.28	89.167	95.5	0.748528	6.1257	0.0152728	53.625	0	0		NaN	0.964164	14.4838	9.76924e-18	95.5	0.862858	8.18366	6.26779e-24	100.28	0	0		NaN	0	0		NaN	0.791628	5.99106	0.0337457	51.876	0	0		NaN	0.92962	11.5972	4.47531e-07	74.444	0
Q9ERU9	177	Q9ERU9	Q9ERU9	E3 SUMO-protein ligase RanBP2	Ranbp2	>sp|Q9ERU9|RBP2_MOUSE E3 SUMO-protein ligase RanBP2 OS=Mus musculus (Mouse) OX=10090 GN=Ranbp2 PE=1 SV=2	0.598333	1.73077	0.0171838	65.157	35.996	65.157	0.576566	1.34064	0.062789	54.066	0	0		NaN	0	0		NaN	0.598333	1.73077	0.0171838	65.157	0	0		NaN	0	0		NaN	0	0		NaN	0	0		NaN	0.581948	1.43654	0.020603	63.216	0
Q99NE5	346	Q99NE5	Q99NE5	Regulating synaptic membrane exocytosis protein 1	Rims1	>sp|Q99NE5|RIMS1_MOUSE Regulating synaptic membrane exocytosis protein 1 OS=Mus musculus (Mouse) OX=10090 GN=Rims1 PE=1 SV=2	0.86993	8.25309	0.00673051	48.729	16.399	48.729	0	0		NaN	0	0		NaN	0	0		NaN	0	0		NaN	0	0		NaN	0	0		NaN	0	0		NaN	0.86993	8.25309	0.00673051	48.729	0	0		NaN
P70425	186	P70425	P70425	GTP-binding protein Rit2	Rit2	>sp|P70425|RIT2_MOUSE GTP-binding protein Rit2 OS=Mus musculus (Mouse) OX=10090 GN=Rit2 PE=1 SV=1	0.952113	12.9847	0.010991	30.205	17.937	30.205	0.952113	12.9847	0.010991	30.205									0.508218	0.142777	0.0391984	20.43
Q9CR57	139	Q9CR57	Q9CR57	60S ribosomal protein L14	Rpl14	>sp|Q9CR57|RL14_MOUSE 60S ribosomal protein L14 OS=Mus musculus (Mouse) OX=10090 GN=Rpl14 PE=1 SV=3	1	72.8462	0.022254	72.846	42.11	72.846	0	0		NaN									0	0		NaN	0	0		NaN					0	0		NaN	0	0		NaN					0
Q99P72	489	Q99P72	Q99P72	Reticulon-4	Rtn4	>sp|Q99P72|RTN4_MOUSE Reticulon-4 OS=Mus musculus (Mouse) OX=10090 GN=Rtn4 PE=1 SV=2	0.781672	5.55456	0.000138942	73.722	41.393	73.722	0.689831	3.52806	0.0349795	39.587	0	0		NaN	0.781672	5.55456	0.000138942	73.722	0.470925	0	0.0533693	28.361													0.43307	0	0.0144048	36.447	0	0		NaN
Q99P72	488	Q99P72	Q99P72	Reticulon-4	Rtn4	>sp|Q99P72|RTN4_MOUSE Reticulon-4 OS=Mus musculus (Mouse) OX=10090 GN=Rtn4 PE=1 SV=2	0.652386	2.73621	0.00011417	81.409	55.05	81.409					0	0		NaN					0.470925	0	0.0533693	28.361	0.633947	2.38895	0.0013557	72.523	0.637487	2.45626	0.000502836	77.24	0.612208	2.07993	0.0314647	51.405	0.43307	0	0.0144048	36.447	0	0		NaN	0.630375
D3YXK2;Q80YR5	366;387	D3YXK2;Q80YR5	D3YXK2	Scaffold attachment factor B1;Scaffold attachment factor B2	Safb;Safb2	>sp|D3YXK2|SAFB1_MOUSE Scaffold attachment factor B1 OS=Mus musculus (Mouse) OX=10090 GN=Safb PE=1 SV=2;>sp|Q80YR5|SAFB2_MOUSE Scaffold attachment factor B2 OS=Mus musculus (Mouse) OX=10090 GN=Safb2 PE=1 SV=2	0.997052	26.6103	5.1714e-12	73.672	62.907	70.452	0.99422	22.4469	5.87811e-09	69.255	0.885439	9.46087	0.0653362	25.186	0.991392	20.6273	1.60797e-08	66.977	0.990515	20.2278	5.1714e-12	73.672	0.983983	18.2039	0.000791497	44.878	0.989175	19.7266	3.57283e-08	62.589	0.992564	22.3316	3.79258e-08	62.099					0.997052	26.6103	5.1771e-10	70.452	0
Q9CQS8;E9PW43	17;34	Q9CQS8	Q9CQS8	Protein transport protein Sec61 subunit beta	Sec61b;Gm10320	>sp|Q9CQS8|SC61B_MOUSE Protein transport protein Sec61 subunit beta OS=Mus musculus (Mouse) OX=10090 GN=Sec61b PE=1 SV=3;>tr|E9PW43|E9PW43_MOUSE Protein transport protein Sec61 subunit beta OS=Mus musculus (Mouse) OX=10090 GN=Gm10320 PE=3 SV=1	0.433529	3.58787	0.0195674	30	23.883	30	0.433529	3.58787	0.0195674	30	0	0		NaN	0	0		NaN	0	0		NaN									0	0		NaN	0	0		NaN	0	0		NaN	0
Q8R121	375	Q8R121	Q8R121	Protein Z-dependent protease inhibitor	Serpina10	>sp|Q8R121|ZPI_MOUSE Protein Z-dependent protease inhibitor OS=Mus musculus (Mouse) OX=10090 GN=Serpina10 PE=1 SV=1	0.71874	3.68803	0.00466539	25.257	6.3211	25.257	0	0		NaN	0	0		NaN	0	0		NaN	0	0		NaN	0	0		NaN	0	0		NaN	0	0		NaN	0	0		NaN	0	0		NaN	0.71874
Q8R121	384	Q8R121	Q8R121	Protein Z-dependent protease inhibitor	Serpina10	>sp|Q8R121|ZPI_MOUSE Protein Z-dependent protease inhibitor OS=Mus musculus (Mouse) OX=10090 GN=Serpina10 PE=1 SV=1	0.873063	7.53699	0.00466539	25.257	6.3211	25.257	0	0		NaN	0	0		NaN	0	0		NaN	0	0		NaN	0	0		NaN	0	0		NaN	0	0		NaN	0	0		NaN	0	0		NaN	0.873063
O35324	74	O35324	O35324	SH2 domain-containing protein 1B	Sh2d1b	>sp|O35324|SH21B_MOUSE SH2 domain-containing protein 1B OS=Mus musculus (Mouse) OX=10090 GN=Sh2d1b PE=1 SV=1	0.993144	21.5288	0.0178731	27.734	8.4479	27.734									0.993144	21.5288	0.0178731	27.734
Q8BI17	425	Q8BI17	Q8BI17	SH2 domain-containing protein 7	Sh2d7	>sp|Q8BI17|SH2D7_MOUSE SH2 domain-containing protein 7 OS=Mus musculus (Mouse) OX=10090 GN=Sh2d7 PE=2 SV=2	0.604433	5.40988	0.0210299	31.771	10.078	31.771	0	0		NaN									0	0		NaN	0	0		NaN									0	0		NaN
Q3UH99	246	Q3UH99	Q3UH99	Protein shisa-6 homolog	Shisa6	>sp|Q3UH99|SHSA6_MOUSE Protein shisa-6 OS=Mus musculus (Mouse) OX=10090 GN=Shisa6 PE=1 SV=1	0.528584	1.04048	0.00294985	50.358	41.561	43.164	0	0		NaN	0	0		NaN	0.491675	0	0.0403432	47.499	0	0		NaN	0	0		NaN					0.492375	0	0.0234065	50.358	0	0		NaN	0.528584	1.04048	0.00294985	43.164
Q8CBA2	362	Q8CBA2	Q8CBA2	Schlafen family member 5	Slfn5	>sp|Q8CBA2|SLFN5_MOUSE Schlafen family member 5 OS=Mus musculus (Mouse) OX=10090 GN=Slfn5 PE=1 SV=2	0.964198	14.6384	0.00596732	26.771	15.657	26.771	0	0		NaN													0.964198	14.6384	0.00596732	26.771													0	0		NaN
Q3UTJ2	829	Q3UTJ2	Q3UTJ2	Sorbin and SH3 domain-containing protein 2	Sorbs2	>sp|Q3UTJ2|SRBS2_MOUSE Sorbin and SH3 domain-containing protein 2 OS=Mus musculus (Mouse) OX=10090 GN=Sorbs2 PE=1 SV=2	0.9976	26.1867	0.00850771	37.77	26.844	37.77									0.9976	26.1867	0.00850771	37.77	0	0		NaN
Q8K004	3	Q8K004	Q8K004		Spata2	>sp|Q8K004|SPAT2_MOUSE Spermatogenesis-associated protein 2 OS=Mus musculus (Mouse) OX=10090 GN=Spata2 PE=1 SV=1	0.543257	0.753337	0.0120114	28.958	17.583	28.958
Q62261	2339	Q62261	Q62261	Spectrin beta chain, non-erythrocytic 1	Sptbn1	>sp|Q62261|SPTB2_MOUSE Spectrin beta chain, non-erythrocytic 1 OS=Mus musculus (Mouse) OX=10090 GN=Sptbn1 PE=1 SV=2	0.31361	0	0.000708223	36.504	29.372	36.13													0.31361	0	0.000740244	36.13					0.295786	0	0.000708223	36.504									0	0		NaN	0
Q62261	2340	Q62261	Q62261	Spectrin beta chain, non-erythrocytic 1	Sptbn1	>sp|Q62261|SPTB2_MOUSE Spectrin beta chain, non-erythrocytic 1 OS=Mus musculus (Mouse) OX=10090 GN=Sptbn1 PE=1 SV=2	0.31361	0	0.000708223	36.504	29.372	36.13													0.31361	0	0.000740244	36.13					0.295786	0	0.000708223	36.504									0	0		NaN	0
Q62261	2337	Q62261	Q62261	Spectrin beta chain, non-erythrocytic 1	Sptbn1	>sp|Q62261|SPTB2_MOUSE Spectrin beta chain, non-erythrocytic 1 OS=Mus musculus (Mouse) OX=10090 GN=Sptbn1 PE=1 SV=2	0.447304	4.49509	4.39091e-06	51.827	41.452	24.407	0.447304	4.49509	0.0108834	24.407									0.31361	0	0.000740244	36.13	0.371824	1.04392	4.39091e-06	51.827	0.295786	0	0.000708223	36.504									0	0		NaN	0
Q62261	2336	Q62261	Q62261	Spectrin beta chain, non-erythrocytic 1	Sptbn1	>sp|Q62261|SPTB2_MOUSE Spectrin beta chain, non-erythrocytic 1 OS=Mus musculus (Mouse) OX=10090 GN=Sptbn1 PE=1 SV=2	0.316601	0.90025	0.000640875	41.446	34.314	40.986									0.316601	0.90025	0.000729508	40.986													0.290023	0.912633	0.000640875	41.446					0	0		NaN	0
E9PX29	2108	E9PX29	E9PX29		Sptbn4	>tr|E9PX29|E9PX29_MOUSE Spectrin beta chain OS=Mus musculus (Mouse) OX=10090 GN=Sptbn4 PE=1 SV=1	0.928699	11.3045	0.0119279	27.967	14.548	27.967	0.891557	9.33776	0.0320628	24.5	0	0		NaN	0.776995	5.57758	0.0604204	20.739	0.928699	11.3045	0.0119279	27.967					0	0		NaN	0	0		NaN	0.841114	7.36145	0.0363493	23.931	0	0		NaN	0
Q9QWI6	407	Q9QWI6	Q9QWI6	SRC kinase signaling inhibitor 1	Srcin1	>sp|Q9QWI6|SRCN1_MOUSE SRC kinase signaling inhibitor 1 OS=Mus musculus (Mouse) OX=10090 GN=Srcin1 PE=1 SV=2	0.250219	0	0.0120995	21.242	14.64	21.242	0	0		NaN	0	0		NaN	0	0		NaN					0	0		NaN	0.250219	0	0.0120995	21.242	0	0		NaN	0	0		NaN	0	0		NaN	0
Q52KI8	448	Q52KI8	Q52KI8	Serine/arginine repetitive matrix protein 1	Srrm1	>sp|Q52KI8|SRRM1_MOUSE Serine/arginine repetitive matrix protein 1 OS=Mus musculus (Mouse) OX=10090 GN=Srrm1 PE=1 SV=2	0.999101	30.4597	4.31979e-05	96.464	86.092	96.464	0.915467	10.3462	0.000643065	81.904	0.794124	5.86284	0.00679014	55.196	0.992469	21.1986	0.000197842	94.09	0.993388	21.7681	0.00260408	64.798	0	0		NaN	0.975951	16.0834	0.000163292	71.279	0.999101	30.4597	4.31979e-05	96.464	0.985693	18.3819	0.000627621	83.877	0.738622	4.51154	0.0234635	52.133	0
P60041	43	P60041	P60041	Somatostatin;Antrin;Somatostatin-28;Somatostatin-14	Sst	>sp|P60041|SMS_MOUSE Somatostatin OS=Mus musculus (Mouse) OX=10090 GN=Sst PE=1 SV=1	0.999486	32.8908	0.00214574	34.96	18.187	34.96									0.999486	32.8908	0.00214574	34.96
O88935	432	O88935	O88935	Synapsin-1	Syn1	>sp|O88935|SYN1_MOUSE Synapsin-1 OS=Mus musculus (Mouse) OX=10090 GN=Syn1 PE=1 SV=2	0.413609	0	0.00583857	32.956	29.062	32.956					0.413609	0	0.00583857	32.956	0	0		NaN									0	0		NaN									0	0		NaN	0
O88935	427	O88935	O88935	Synapsin-1	Syn1	>sp|O88935|SYN1_MOUSE Synapsin-1 OS=Mus musculus (Mouse) OX=10090 GN=Syn1 PE=1 SV=2	0.978315	17.206	5.77412e-20	70.718	66.856	59.263	0.978315	17.206	3.13056e-09	59.263	0.97358	16.1604	2.36982e-09	59.893	0.494894	1.41086	0.0032586	34.78	0.751699	6.47693	0.00430589	34.04	0.928208	11.5957	7.21522e-14	62.582	0.885878	10.124	9.0139e-05	44.164	0.962397	14.4282	5.77412e-20	70.718	0.746519	5.29491	1.76952e-05	48.18	0.963734	14.4623	5.44296e-09	57.347	0.768275
Q64332	433	Q64332	Q64332	Synapsin-2	Syn2	>sp|Q64332|SYN2_MOUSE Synapsin-2 OS=Mus musculus (Mouse) OX=10090 GN=Syn2 PE=1 SV=2	0.455228	0	1.33827e-24	71.678	68.232	35.158	0.392362	0	0.00127411	31.771	0	0		NaN	0.301958	0	5.28299e-05	35.621	0.331839	0	1.33827e-24	71.678	0.290693	0	0.00138915	27.825	0.32376	0	6.34081e-05	36.319	0.288463	0	0.00814721	23.62	0.455228	0	0.000241296	35.158					0
Q64332	432	Q64332	Q64332	Synapsin-2	Syn2	>sp|Q64332|SYN2_MOUSE Synapsin-2 OS=Mus musculus (Mouse) OX=10090 GN=Syn2 PE=1 SV=2	0.455228	0	1.33827e-24	71.678	68.232	35.158	0.392362	0	0.00127411	31.771	0	0		NaN	0.301958	0	5.28299e-05	35.621	0.331839	0	1.33827e-24	71.678	0.290693	0	0.00138915	27.825	0.32376	0	6.34081e-05	36.319	0.288463	0	0.00814721	23.62	0.455228	0	0.000241296	35.158					0
Q64332	426	Q64332	Q64332	Synapsin-2	Syn2	>sp|Q64332|SYN2_MOUSE Synapsin-2 OS=Mus musculus (Mouse) OX=10090 GN=Syn2 PE=1 SV=2	0.992954	23.591	2.06837e-85	118.54	109.96	96.317	0.981023	17.4035	2.06837e-85	118.54	0.625717	5.36087	1.85381e-11	59.359	0.963343	15.3019	4.12888e-57	99.219	0.574737	4.52155	1.33827e-24	71.678	0.952187	14.3226	1.19198e-24	77.241	0.880542	12.0808	6.89766e-25	78.098	0.960772	14.9798	1.55456e-44	92.41	0.992954	23.591	1.36977e-45	96.317	0.952123	13.2518	1.49713e-70	105.7	0.609414
F6SEU4	788	F6SEU4	F6SEU4	Ras/Rap GTPase-activating protein SynGAP	Syngap1	>sp|F6SEU4|SYGP1_MOUSE Ras/Rap GTPase-activating protein SynGAP OS=Mus musculus (Mouse) OX=10090 GN=Syngap1 PE=1 SV=2	0.971771	15.3688	5.61039e-08	65.477	51.687	63.936	0.871516	8.31425	0.00177999	44.441	0.792287	5.8142	4.6955e-05	54.237	0.940016	11.951	0.000642211	50.178	0.971771	15.3688	7.30931e-08	63.936	0.77535	5.37992	0.00302066	42.818	0.91531	10.3374	0.00019525	52.432	0.930095	11.2402	5.61039e-08	65.477	0.947326	12.549	0.000631585	50.232	0.770496	5.25979	0.00411741	41.386
E9QAP7	479	E9QAP7	E9QAP7		Taf4a	>tr|E9QAP7|E9QAP7_MOUSE TAFH domain-containing protein OS=Mus musculus (Mouse) OX=10090 GN=Taf4 PE=1 SV=1	1	25.342	0.0194624	25.342	11.908	25.342	0	0		NaN	0	0		NaN	1	25.342	0.0194624	25.342	0	0		NaN	0	0		NaN	0	0		NaN	0	0		NaN	0	0		NaN	0	0		NaN	0
E9QAP7	477	E9QAP7	E9QAP7		Taf4a	>tr|E9QAP7|E9QAP7_MOUSE TAFH domain-containing protein OS=Mus musculus (Mouse) OX=10090 GN=Taf4 PE=1 SV=1	1	25.342	0.0194624	25.342	11.908	25.342	0	0		NaN	0	0		NaN	1	25.342	0.0194624	25.342	0	0		NaN	0	0		NaN	0	0		NaN	0	0		NaN	0	0		NaN	0	0		NaN	0
E9QAP7	480	E9QAP7	E9QAP7		Taf4a	>tr|E9QAP7|E9QAP7_MOUSE TAFH domain-containing protein OS=Mus musculus (Mouse) OX=10090 GN=Taf4 PE=1 SV=1	1	25.342	0.0194624	25.342	11.908	25.342	0	0		NaN	0	0		NaN	1	25.342	0.0194624	25.342	0	0		NaN	0	0		NaN	0	0		NaN	0	0		NaN	0	0		NaN	0	0		NaN	0
F8VPN2	1736	F8VPN2	F8VPN2		Tex15	>sp|F8VPN2|TEX15_MOUSE Testis-expressed protein 15 OS=Mus musculus (Mouse) OX=10090 GN=Tex15 PE=2 SV=1	0.206029	0	0.0228687	27.714	18.333	27.714
F8VPN2	1743	F8VPN2	F8VPN2		Tex15	>sp|F8VPN2|TEX15_MOUSE Testis-expressed protein 15 OS=Mus musculus (Mouse) OX=10090 GN=Tex15 PE=2 SV=1	0.206029	0	0.0228687	27.714	18.333	27.714
F8VPN2	1733	F8VPN2	F8VPN2		Tex15	>sp|F8VPN2|TEX15_MOUSE Testis-expressed protein 15 OS=Mus musculus (Mouse) OX=10090 GN=Tex15 PE=2 SV=1	0.206029	0	0.0228687	27.714	18.333	27.714
Q9JKX3	274	Q9JKX3	Q9JKX3	Transferrin receptor protein 2	Tfr2	>sp|Q9JKX3|TFR2_MOUSE Transferrin receptor protein 2 OS=Mus musculus (Mouse) OX=10090 GN=Tfr2 PE=1 SV=2	0.499648	0	0.00462206	32.227	28.714	32.227																													0.499648	0	0.00462206	32.227
Q9JKX3	273	Q9JKX3	Q9JKX3	Transferrin receptor protein 2	Tfr2	>sp|Q9JKX3|TFR2_MOUSE Transferrin receptor protein 2 OS=Mus musculus (Mouse) OX=10090 GN=Tfr2 PE=1 SV=2	0.499648	0	0.00462206	32.227	28.714	32.227																													0.499648	0	0.00462206	32.227
Q91WU4	3	Q91WU4	Q91WU4	Transmembrane and coiled-coil domain-containing protein 4	Tmco4	>sp|Q91WU4|TMCO4_MOUSE Transmembrane and coiled-coil domain-containing protein 4 OS=Mus musculus (Mouse) OX=10090 GN=Tmco4 PE=2 SV=2	1	28.2045	0.0143756	28.204	12.575	28.204
Q3TUD9	116	Q3TUD9	Q3TUD9	Transmembrane protein 18	Tmem18	>sp|Q3TUD9|TMM18_MOUSE Transmembrane protein 18 OS=Mus musculus (Mouse) OX=10090 GN=Tmem18 PE=2 SV=1	0.499515	0	0.0126764	28.204	15.197	28.204
Q3TUD9	118	Q3TUD9	Q3TUD9	Transmembrane protein 18	Tmem18	>sp|Q3TUD9|TMM18_MOUSE Transmembrane protein 18 OS=Mus musculus (Mouse) OX=10090 GN=Tmem18 PE=2 SV=1	0.499515	0	0.0126764	28.204	15.197	28.204
Q9CZW5	94	Q9CZW5	Q9CZW5	Mitochondrial import receptor subunit TOM70	Tomm70a	>sp|Q9CZW5|TOM70_MOUSE Mitochondrial import receptor subunit TOM70 OS=Mus musculus (Mouse) OX=10090 GN=Tomm70 PE=1 SV=2	0.960903	14.4482	0.000465049	40.067	36.205	35.215	0	0		NaN	0	0		NaN	0.732312	4.87847	0.0349796	25.645	0	0		NaN	0.776872	5.70351	0.000858891	36.3	0	0		NaN	0.960903	14.4482	0.00186654	35.215	0	0		NaN	0.87212	9.64688	0.0168743	27.119	0
Q7TQD2	31	Q7TQD2	Q7TQD2	Tubulin polymerization-promoting protein	Tppp	>sp|Q7TQD2|TPPP_MOUSE Tubulin polymerization-promoting protein OS=Mus musculus (Mouse) OX=10090 GN=Tppp PE=1 SV=1	0.999971	45.4269	9.52013e-202	189.05	175.6	189.05	0.999832	37.7678	1.55744e-45	96.117	0.999662	34.7228	1.04052e-70	105.54					0.997352	25.7628	1.67312e-33	82.605	0.999971	45.4269	9.52013e-202	189.05	0.997895	26.7603	1.31312e-44	91.819					0.996523	24.5757	3.92981e-71	110.88					0.999569
Q7TQD2	15	Q7TQD2	Q7TQD2	Tubulin polymerization-promoting protein	Tppp	>sp|Q7TQD2|TPPP_MOUSE Tubulin polymerization-promoting protein OS=Mus musculus (Mouse) OX=10090 GN=Tppp PE=1 SV=1	0.999984	48.0383	9.24858e-06	73.448	66.391	73.448	0.999984	48.0383	9.24858e-06	73.448	0.99967	34.8114	0.0053744	59.997	0.999673	34.8501	0.00181833	62.617	0.999892	39.6528	0.0029675	61.319	0.999696	35.172	0.0175126	53.327	0.998516	28.2784	0.0118763	56.424	0.999762	36.2371	0.00878346	58.123	0.999542	33.3869	0.0155101	54.427	0.99981	37.2103	0.001852	62.468	0
Q9JKE1	173	Q9JKE1	Q9JKE1		Trem3	>sp|Q9JKE1|TREM3_MOUSE Triggering receptor expressed on myeloid cells 3 OS=Mus musculus (Mouse) OX=10090 GN=Trem3 PE=1 SV=1	0.652766	0	0.0182383	20.838	11.998	20.838																					0	0		NaN	0.652766	0	0.0182383	20.838	0	0		NaN					0
Q9JKE1	174	Q9JKE1	Q9JKE1		Trem3	>sp|Q9JKE1|TREM3_MOUSE Triggering receptor expressed on myeloid cells 3 OS=Mus musculus (Mouse) OX=10090 GN=Trem3 PE=1 SV=1	0.652766	0	0.0182383	20.838	11.998	20.838																					0	0		NaN	0.652766	0	0.0182383	20.838	0	0		NaN					0
Q9JKE1	171	Q9JKE1	Q9JKE1		Trem3	>sp|Q9JKE1|TREM3_MOUSE Triggering receptor expressed on myeloid cells 3 OS=Mus musculus (Mouse) OX=10090 GN=Trem3 PE=1 SV=1	0.652766	0	0.0182383	20.838	11.998	20.838																					0	0		NaN	0.652766	0	0.0182383	20.838	0	0		NaN					0
Q9EPK8	663	Q9EPK8	Q9EPK8	Transient receptor potential cation channel subfamily V member 4	Trpv4	>sp|Q9EPK8|TRPV4_MOUSE Transient receptor potential cation channel subfamily V member 4 OS=Mus musculus (Mouse) OX=10090 GN=Trpv4 PE=1 SV=1	0.666667	0	0.00540982	32.933	9.2564	32.933									0.666667	0	0.00540982	32.933					0	0		NaN
Q9EPK8	665	Q9EPK8	Q9EPK8	Transient receptor potential cation channel subfamily V member 4	Trpv4	>sp|Q9EPK8|TRPV4_MOUSE Transient receptor potential cation channel subfamily V member 4 OS=Mus musculus (Mouse) OX=10090 GN=Trpv4 PE=1 SV=1	0.666667	0	0.00540982	32.933	9.2564	32.933									0.666667	0	0.00540982	32.933					0	0		NaN
Q9EPK8	667	Q9EPK8	Q9EPK8	Transient receptor potential cation channel subfamily V member 4	Trpv4	>sp|Q9EPK8|TRPV4_MOUSE Transient receptor potential cation channel subfamily V member 4 OS=Mus musculus (Mouse) OX=10090 GN=Trpv4 PE=1 SV=1	0.666667	0	0.00540982	32.933	9.2564	32.933									0.666667	0	0.00540982	32.933					0	0		NaN
Q5NCI0	374	Q5NCI0	Q5NCI0	Up-regulator of cell proliferation	Urgcp	>sp|Q5NCI0|URGCP_MOUSE Up-regulator of cell proliferation OS=Mus musculus (Mouse) OX=10090 GN=Urgcp PE=2 SV=1	0.640894	0	0.00062356	50.353	6.0359	50.353																	0.640894	0	0.00062356	50.353
Q5NCI0	370	Q5NCI0	Q5NCI0	Up-regulator of cell proliferation	Urgcp	>sp|Q5NCI0|URGCP_MOUSE Up-regulator of cell proliferation OS=Mus musculus (Mouse) OX=10090 GN=Urgcp PE=2 SV=1	0.640894	0	0.00062356	50.353	6.0359	50.353																	0.640894	0	0.00062356	50.353
Q5NCI0	375	Q5NCI0	Q5NCI0	Up-regulator of cell proliferation	Urgcp	>sp|Q5NCI0|URGCP_MOUSE Up-regulator of cell proliferation OS=Mus musculus (Mouse) OX=10090 GN=Urgcp PE=2 SV=1	0.718211	1.05298	0.00062356	50.353	6.0359	50.353																	0.718211	1.05298	0.00062356	50.353
Q8VHI5	357	Q8VHI5	Q8VHI5	Vitrin	Vit	>sp|Q8VHI5|VITRN_MOUSE Vitrin OS=Mus musculus (Mouse) OX=10090 GN=Vit PE=1 SV=2	0.729383	4.12797	0.00401851	39.785	27.267	39.785																									0.729383	4.12797	0.00401851	39.785
Q8VHI5	354	Q8VHI5	Q8VHI5	Vitrin	Vit	>sp|Q8VHI5|VITRN_MOUSE Vitrin OS=Mus musculus (Mouse) OX=10090 GN=Vit PE=1 SV=2	0.959666	12.5219	0.00401851	39.785	27.267	39.785																									0.959666	12.5219	0.00401851	39.785
Q9EQ41	182	Q9EQ41	Q9EQ41		Vmn1r29	>tr|Q9EQ41|Q9EQ41_MOUSE Vomeronasal type-1 receptor OS=Mus musculus (Mouse) OX=10090 GN=Vmn1r29 PE=3 SV=1	0.579241	0	0.0096316	22.857	10.339	22.857																									0.579241	0	0.0096316	22.857
Q9EQ41	180	Q9EQ41	Q9EQ41		Vmn1r29	>tr|Q9EQ41|Q9EQ41_MOUSE Vomeronasal type-1 receptor OS=Mus musculus (Mouse) OX=10090 GN=Vmn1r29 PE=3 SV=1	0.579241	0	0.0096316	22.857	10.339	22.857																									0.579241	0	0.0096316	22.857
Q9EQ41	178	Q9EQ41	Q9EQ41		Vmn1r29	>tr|Q9EQ41|Q9EQ41_MOUSE Vomeronasal type-1 receptor OS=Mus musculus (Mouse) OX=10090 GN=Vmn1r29 PE=3 SV=1	0.849529	4.4658	0.0096316	22.857	10.339	22.857																									0.849529	4.4658	0.0096316	22.857
Q9EQ41	170	Q9EQ41	Q9EQ41		Vmn1r29	>tr|Q9EQ41|Q9EQ41_MOUSE Vomeronasal type-1 receptor OS=Mus musculus (Mouse) OX=10090 GN=Vmn1r29 PE=3 SV=1	0.991988	17.2032	0.0096316	22.857	10.339	22.857																									0.991988	17.2032	0.0096316	22.857
Q3UGF1	6	Q3UGF1	Q3UGF1	WD repeat-containing protein 19	Wdr19	>sp|Q3UGF1|WDR19_MOUSE WD repeat-containing protein 19 OS=Mus musculus (Mouse) OX=10090 GN=Wdr19 PE=1 SV=1	1	35.7104	0.0104559	35.71	6.1604	35.71																					0	0		NaN	1	35.7104	0.0104559	35.71
E9PYD7;G5E8C2	98;35	E9PYD7	E9PYD7		Zbtbd6;Kbtbd7	>tr|E9PYD7|E9PYD7_MOUSE BTB domain-containing protein OS=Mus musculus (Mouse) OX=10090 GN=Kbtbd6 PE=4 SV=3;>tr|G5E8C2|G5E8C2_MOUSE Kelch repeat and BTB (POZ) domain-containing 7 OS=Mus musculus (Mouse) OX=10090 GN=Kbtbd7 PE=4 SV=1	0.992513	25.0928	0.00337463	29.618	21.755	29.618	0	0		NaN	0	0		NaN	0	0		NaN	0	0		NaN	0	0		NaN	0	0		NaN	0	0		NaN	0	0		NaN	0.992513	25.0928	0.00337463	29.618	0
Q9D654	94	Q9D654	Q9D654		Zfp84	>tr|Q9D654|Q9D654_MOUSE Zinc finger protein 84 OS=Mus musculus (Mouse) OX=10090 GN=Zfp84 PE=1 SV=1	0.895533	10.8334	0.0182635	23.934	13.793	23.934													0.895533	10.8334	0.0182635	23.934
P70121	782	P70121	P70121	Zinc fingers and homeoboxes protein 1	Zhx1	>sp|P70121|ZHX1_MOUSE Zinc fingers and homeoboxes protein 1 OS=Mus musculus (Mouse) OX=10090 GN=Zhx1 PE=1 SV=2	0.502167	0	0.00356506	28.986	14.195	28.986	0	0		NaN																	0	0		NaN
P70121	780	P70121	P70121	Zinc fingers and homeoboxes protein 1	Zhx1	>sp|P70121|ZHX1_MOUSE Zinc fingers and homeoboxes protein 1 OS=Mus musculus (Mouse) OX=10090 GN=Zhx1 PE=1 SV=2	0.502167	0	0.00356506	28.986	14.195	28.986	0	0		NaN																	0	0		NaN
P70121	789	P70121	P70121	Zinc fingers and homeoboxes protein 1	Zhx1	>sp|P70121|ZHX1_MOUSE Zinc fingers and homeoboxes protein 1 OS=Mus musculus (Mouse) OX=10090 GN=Zhx1 PE=1 SV=2	0.997833	23.6122	0.00356506	28.986	14.195	28.986	0	0		NaN																	0	0		NaN
P70121	788	P70121	P70121	Zinc fingers and homeoboxes protein 1	Zhx1	>sp|P70121|ZHX1_MOUSE Zinc fingers and homeoboxes protein 1 OS=Mus musculus (Mouse) OX=10090 GN=Zhx1 PE=1 SV=2	0.997833	23.6122	0.00356506	28.986	14.195	28.986	0	0		NaN																	0	0		NaN
Q61624	156	Q61624	Q61624	Zinc finger protein 148	Znf148	>sp|Q61624|ZN148_MOUSE Zinc finger protein 148 OS=Mus musculus (Mouse) OX=10090 GN=Znf148 PE=1 SV=2	0.998348	27.8124	0.00514637	39.73	13.024	39.73	0	0		NaN	0	0		NaN	0	0		NaN	0	0		NaN	0	0		NaN					0.998348	27.8124	0.00514637	39.73	0	0		NaN	0	0		NaN
[truncated: 189 more columns]
