# Supplementary material for: The Beneficial Effect of Mitochondrial Transfer Therapy in 5XFAD Mice via Liver–Serum–Brain Response
Source: Cells. 2023 Mar 24;12(7):1006. doi: 10.3390/cells12071006 (PMC10093713; doi:10.3390/cells12071006)
Supplement: Supplementary file 1 [file cells-12-01006-s001.zip › Supplemental Hippocampus Proteomics excel.xlsx]

## Sheet: ProteinGroups
			Tg vs Tg-Mito				Tg vs WT				Tg-Mito vs WT				Tg-Mito F vs WT F				Tg M vs Tg-Mito M				Tg M vs WT M				Tg-Mito M vs WT M				Tg-Mito F vs Tg-Mito M				WT F vs WT M
Majority protein IDs	Protein names	Gene names	Student's T-test p-value Tg_Tg-Mito	Student's T-test q-value Tg_Tg-Mito	Student's T-test Difference Tg_Tg-Mito	Fold Change	Student's T-test p-value Tg_WT	Student's T-test q-value Tg_WT	Student's T-test Difference Tg_WT	Fold Change	Student's T-test p-value Tg-Mito_WT	Student's T-test q-value Tg-Mito_WT	Student's T-test Difference Tg-Mito_WT	Fold Change	Student's T-test p-value Tg-Mito F_WT F	Student's T-test q-value Tg-Mito F_WT F	Student's T-test Difference Tg-Mito F_WT F	Fold Change	Student's T-test p-value Tg M_Tg-Mito M	Student's T-test q-value Tg M_Tg-Mito M	Student's T-test Difference Tg M_Tg-Mito M	Fold Change	Student's T-test p-value Tg M_WT M	Student's T-test q-value Tg M_WT M	Student's T-test Difference Tg M_WT M	Fold Change	Student's T-test p-value Tg-Mito M_WT M	Student's T-test q-value Tg-Mito M_WT M	Student's T-test Difference Tg-Mito M_WT M	Fold Change	Student's T-test p-value Tg-Mito F_Tg-Mito M	Student's T-test q-value Tg-Mito F_Tg-Mito M	Student's T-test Difference Tg-Mito F_Tg-Mito M	Fold Change	Student's T-test p-value WT F_WT M	Student's T-test q-value WT F_WT M	Student's T-test Difference WT F_WT M	Fold Change	LFQ intensity 1 Tg 1340.3 F	LFQ intensity 2 Tg 1336.3 M	LFQ intensity 3 Tg 1336.4 M	LFQ intensity 4 Tg 1338.2 M	LFQ intensity 5 Tg-Mito 1340.1 F	LFQ intensity 6 Tg-Mito 1340.2 F	LFQ intensity 7 Tg-Mito 1336.1 M	LFQ intensity 8 Tg-Mito 1336.2 M	LFQ intensity 9 Tg-Mito 1338.1 M	LFQ intensity 10 WT 1341.1 F	LFQ intensity 11 WT 1341.2 F
P05067	Amyloid-beta precursor protein	APP	0.257312	0.822141	-0.137749	0.908936	7.21933e-06	0.0713333	1.41678	2.6699	3.88643e-07	0.048	1.55453	2.93739	0.000814641	0.353778	1.51201	2.85208	0.636501	1	-0.083772	0.943587	0.000769147	0.2552	1.49911	2.82668	0.000352486	0.952667	1.58288	2.99568	0.313335	0.854935	0.158534	1.11615	0.173761	1	0.229404	1.17235	34.239	33.9421	34.3205	34.3411	34.4173	34.4698	34.3107	34.4447	34.0996	32.8973	32.9658
P12023	Amyloid-beta A4 protein	App	0.00243097	0.469313	-0.496476	0.708836	0.237901	0.888648	0.180048	1.13292	0.000151597	0.148706	0.676524	1.59828	0.0308864	0.36825	0.760996	1.69466	0.048075	0.904461	-0.368711	0.774474	0.263052	0.831149	0.251498	1.19044	0.0131408	0.647719	0.620209	1.5371	0.0103717	0.742737	0.175299	1.1292	0.881048	1	0.0345122	1.02421	27.2909	27.3642	27.4232	27.777	28.0717	28.0593	27.8748	27.9359	27.8598	27.1677	27.4413
P05067p40	Amyloid-beta 1-40 protein	APP 1-40	0.052321	0.473714	1.18091	2.2672	1.65795e-05	0.24	12.6809	6566.43	6.33767e-06	0.06	11.5	2896.27	0.000885539	0.4912	11.9355	3916.96	0.269761	0.881353	0.821017	1.76665	0.00261914	0.345333	12.0306	4183.92	0.00335344	1	11.2096	2368.28	0.203223	0.681673	-1.01489	0.494866	0.495025	1	-1.74079	0.299206	32.5872	31.8489	33.3663	33.099	30.5801	31.2909	31.0767	32.3113	32.4632	19	19
P05067p42	Amyloid-beta 1-42 protein	APP 1-42	0.0586424	0.293143	2.51822	5.72873	0.0586424	0.224538	2.51822	5.72873	NaN	1	0	1	1	0.999131	0	1	0.178382	0.777951	2.83628	7.14176	0.178382	0.513986	2.83628	7.14176	1	0.999779	0	1	1	0.999659	0	1	1	1	0	1	20.564	19	21.5088	25	19	19	19	19	19	19	19
P68372	Tubulin beta-4B chain	Tubb4b	0.0384649	0.712615	-0.237645	0.848128	0.196408	0.879008	-0.230361	0.852422	0.963309	0.992144	0.00728455	1.00506	0.604506	0.843731	0.171774	1.12644	0.267317	1	-0.130643	0.913424	0.316652	0.860629	-0.233018	0.850853	0.641168	0.977443	-0.102375	0.931498	0.122087	0.749639	0.225434	1.16913	0.888463	1	-0.048715	0.966797	38.3224	38.4189	38.4978	38.2524	38.8152	38.6763	38.3972	38.6437	38.5202	38.8474	38.3006
P63260	Actin, cytoplasmic 2	Actg1	0.0398116	0.778252	-0.162898	0.893229	0.501714	0.979098	-0.0425228	0.970956	0.129049	0.8426	0.120375	1.08702	0.251149	0.723166	0.19047	1.14114	0.221666	1	-0.06493	0.955992	0.872749	0.995654	0.00871531	1.00606	0.21167	0.977207	0.0736453	1.05237	0.0151664	0.702112	0.202515	1.1507	0.461829	1	0.0856902	1.0612	38.2196	38.2377	38.2749	38.3496	38.5439	38.5658	38.3217	38.3219	38.4134	38.4831	38.2457
P05213	Tubulin alpha-1B chain	Tuba1b	0.0161109	0.640831	-0.261924	0.833975	0.140934	0.877803	-0.20786	0.865821	0.683323	0.952903	0.0540642	1.03819	0.449404	0.758038	0.23843	1.17971	0.0289653	0.996098	-0.128241	0.914946	0.212554	0.85033	-0.197088	0.87231	0.626656	0.9794	-0.0688464	0.9534	0.00245634	0.700014	0.276754	1.21147	0.911595	1	-0.030522	0.979066	37.8597	37.8974	38.0081	37.9494	38.369	38.3443	38.1181	38.0773	38.0443	38.3735	37.8629
Q6PIC6	Sodium/potassium-transporting ATPase subunit alpha-3	Atp1a3	0.165835	0.940031	-0.043189	0.970507	0.0334802	0.936434	-0.0798269	0.946171	0.33704	0.95378	-0.0366379	0.974924	0.253192	0.929547	0.038105	1.02676	0.711164	0.998537	-0.0067838	0.995309	0.111303	0.908457	-0.0932503	0.937408	0.145105	0.972166	-0.0864665	0.941827	0.0473599	0.88738	0.0875982	1.0626	0.571733	1	-0.0369733	0.974698	37.5536	37.5457	37.5689	37.5625	37.6294	37.6774	37.5795	37.5832	37.5347	37.6157	37.6149
P11798	Calcium/calmodulin-dependent protein kinase type II subunit alpha	Camk2a	0.0355631	0.642382	0.289359	1.2221	0.31129	0.902507	0.167883	1.12341	0.459188	0.889118	-0.121476	0.919247	0.0695307	0.396746	-0.426445	0.744093	0.18809	0.970829	0.22692	1.17033	0.197716	0.783264	0.308757	1.23864	0.729921	0.982091	0.0818367	1.05836	0.38122	0.853862	-0.183781	0.880393	0.267279	1	0.324501	1.25223	37.6963	37.7513	37.8674	37.6031	37.4485	37.2113	37.4422	37.3492	37.7497	37.7623	37.7504
P04370	Myelin basic protein	Mbp	0.294182	0.779047	-0.257783	0.836372	0.367893	0.883893	-0.317158	0.80265	0.867497	0.970825	-0.059375	0.95968	0.914922	0.972773	0.0507011	1.03577	0.591648	1	-0.204114	0.868071	0.516895	0.902041	-0.336873	0.791755	0.829348	0.99207	-0.132759	0.912085	0.921274	0.989834	0.0487556	1.03437	0.853187	1	-0.134705	0.910856	36.8896	36.9082	37.1946	36.9758	37.4368	37.1214	36.6419	37.8188	37.2302	37.6175	36.8393
P60202	Myelin proteolipid protein	Plp1	0.112416	0.714974	-0.290737	0.817484	0.435848	0.898547	-0.262953	0.83338	0.93038	0.986626	0.027784	1.01945	0.573792	0.810629	0.222916	1.16709	0.441583	1	-0.208719	0.865305	0.543058	0.896005	-0.311022	0.80607	0.853156	0.998238	-0.102304	0.931544	0.65249	0.933233	0.151833	1.11098	0.805742	1	-0.173386	0.886759	36.8356	36.7762	36.9761	37.0101	37.2216	37.341	36.6628	37.351	37.3747	37.3876	36.7292
P16858;S4R1W1;A0A1D5RLD8	Glyceraldehyde-3-phosphate dehydrogenase	Gapdh;Gm3839	0.156098	0.812243	-0.150388	0.901008	0.277154	0.935803	-0.0996325	0.933271	0.652891	0.953058	0.0507553	1.03581	0.218964	0.698806	0.239544	1.18062	0.594001	0.998046	-0.0245387	0.983135	0.434699	0.922817	-0.0996424	0.933264	0.54045	0.978889	-0.0751038	0.949274	0.00702779	0.664978	0.321029	1.24922	0.972404	1	0.00638135	1.00443	37.2165	37.1453	37.2645	37.2089	37.6008	37.5028	37.1813	37.2547	37.2563	37.4385	37.186
P16546	Spectrin alpha chain, non-erythrocytic 1	Sptan1	0.433103	0.95982	-0.0237606	0.983665	0.610203	0.988634	-0.0287914	0.980241	0.913795	0.992067	-0.00503082	0.996519	0.088093	0.798687	-0.10376	0.930605	0.305761	1	-0.0458005	0.968752	0.838195	0.992264	0.0149879	1.01044	0.35285	0.97585	0.0607885	1.04304	0.0245818	0.954733	-0.0532068	0.963792	0.247036	1	0.111341	1.08023	36.8247	36.7641	36.8937	36.807	36.8054	36.823	36.8831	36.8649	36.8543	36.8862	36.9498
P56480	ATP synthase subunit beta, mitochondrial	Atp5f1b	0.302884	0.93104	-0.0562944	0.961731	0.946266	0.999713	-0.00129337	0.999104	0.267905	0.936585	0.0550011	1.03886	0.00639156	0.699863	0.150221	1.10974	0.758931	0.999236	0.0140495	1.00979	0.841305	0.995202	0.00557073	1.00387	0.87283	0.997273	-0.0084788	0.99414	0.0722467	0.81505	0.151374	1.11063	0.840241	1	-0.00732613	0.994935	36.7122	36.7446	36.75	36.7594	36.8999	36.8774	36.7904	36.7683	36.6532	36.7342	36.7427
Q03265	ATP synthase subunit alpha, mitochondrial	Atp5f1a	0.665527	0.951539	-0.0337219	0.976897	0.136987	0.918359	-0.106004	0.929158	0.303263	0.92238	-0.0722824	0.951132	0.261425	0.823723	0.105577	1.07592	0.427706	1	0.0645396	1.04575	0.162491	0.897918	-0.126316	0.916168	0.0366339	0.893137	-0.190856	0.876086	0.103387	0.793828	0.172447	1.12697	0.123609	1	-0.123987	0.917648	36.379	36.4542	36.4212	36.6128	36.6703	36.5377	36.3989	36.3788	36.517	36.4827	36.5142
Q7TMM9	Tubulin beta-2A chain	Tubb2a	0.240628	0.814678	-0.158421	0.896005	0.364257	0.912888	-0.147153	0.90303	0.947377	0.991706	0.0112679	1.00784	0.841615	0.935194	0.0880585	1.06294	0.693866	0.99888	-0.0284627	0.980464	0.639361	0.965045	-0.0683886	0.953703	0.760214	0.99856	-0.0399259	0.972705	0.154633	0.697481	0.311294	1.24082	0.566631	1	0.18331	1.13549	36.6329	36.5979	36.7798	36.5862	37.2109	36.7779	36.7203	36.6919	36.6371	37.2285	36.5841
Q8CGP1;P10853;Q8CGP2;P70696	Histone H2B type 1-K;Histone H2B type 1-F/J/L;Histone H2B type 1-P	H2bc12;H2bc13	0.34175	0.822233	0.152022	1.11113	0.739808	0.980467	-0.0531807	0.963809	0.21769	0.795616	-0.205202	0.867417	0.460268	0.863727	-0.097578	0.934601	0.551259	1	0.131992	1.09581	0.54118	0.911054	-0.14496	0.904405	0.35554	0.901315	-0.276952	0.825333	0.6014	0.930658	0.137578	1.10006	0.882769	1	-0.0417964	0.971445	36.3109	35.8633	35.9803	36.1883	36.0785	35.954	35.5335	36.137	35.9654	36.2016	36.026
P62806	Histone H4	H4f16	0.875262	0.973599	0.0241356	1.01687	0.96986	0.99651	-0.00469284	0.996752	0.861132	0.975856	-0.0288284	0.980216	0.512117	0.848572	0.120367	1.08701	0.481816	1	0.122298	1.08847	0.97305	0.996448	-0.00599416	0.995854	0.598592	0.975564	-0.128292	0.914914	0.201381	0.700673	0.350593	1.27508	0.68188	1	0.101934	1.07321	36.4098	36.1762	36.2612	36.2872	36.5782	36.3614	35.8864	36.411	36.0602	36.4564	36.2425
O08553	Dihydropyrimidinase-related protein 2	Dpysl2	0.0915991	0.855524	-0.0863457	0.941906	0.782225	0.993404	0.0120499	1.00839	0.069739	0.865376	0.0983955	1.07058	0.0129149	0.721519	0.130726	1.09484	0.464039	1	-0.0476685	0.967499	0.67683	0.991041	0.0291735	1.02043	0.358292	0.982646	0.076842	1.05471	0.253926	0.91446	0.0884692	1.06324	0.667937	1	0.0345853	1.02426	36.3813	36.336	36.4511	36.3964	36.5302	36.531	36.437	36.5289	36.3605	36.3849	36.4149
P16330	2,3-cyclic-nucleotide 3-phosphodiesterase	Cnp	0.124463	0.763803	-0.234005	0.850271	0.294831	0.874642	-0.324096	0.798799	0.752453	0.949875	-0.0900909	0.939464	0.945188	0.986184	0.0260925	1.01825	0.388944	1	-0.20282	0.868851	0.415479	0.841366	-0.370366	0.773586	0.732562	0.978586	-0.167547	0.890356	0.989181	1	0.00398636	1.00277	0.765608	1	-0.189653	0.876817	36.0568	36.1194	36.1887	36.2172	36.4289	36.335	35.9632	36.6139	36.5567	36.6886	36.023
Q91XV3	Brain acid soluble protein 1	Basp1	0.0462669	0.579548	0.547527	1.46158	0.973502	0.995371	0.0103027	1.00717	0.142682	0.598831	-0.537225	0.689095	0.37994	0.632901	-0.838436	0.559249	0.253866	0.96492	0.276577	1.21132	0.781311	0.980615	-0.0598399	0.959371	0.306866	0.890881	-0.336417	0.792006	0.0908937	0.704432	-0.665207	0.630598	0.807683	1	-0.163188	0.89305	36.2475	36.2661	36.2337	36.1843	35.2239	35.3486	36.0193	35.565	36.2701	35.3771	36.8722
P05064	Fructose-bisphosphate aldolase A	Aldoa	0.383287	0.94959	-0.0310705	0.978694	0.601917	0.993195	-0.0176306	0.987854	0.683161	0.985009	0.0134399	1.00936	0.924151	0.9909	-0.00401688	0.99722	0.514749	1	-0.0328967	0.977456	0.868508	0.997182	-0.00781886	0.994595	0.627779	1	0.0250778	1.01753	0.711136	0.989795	0.0215645	1.01506	0.316442	1	0.0506592	1.03574	36.2753	36.1847	36.2881	36.2277	36.325	36.2509	36.3304	36.2099	36.2588	36.2964	36.2875
P08553	Neurofilament medium polypeptide	Nefm	0.891972	0.967952	0.0338333	1.02373	0.099804	0.632303	-0.558524	0.678997	0.0553234	0.489253	-0.592357	0.663258	0.125431	0.383853	-0.602053	0.658816	0.42804	1	-0.247236	0.842509	0.100343	0.513653	-0.833129	0.561311	0.158444	0.791807	-0.585893	0.666237	0.0975436	0.680196	-0.50742	0.703479	0.326614	1	-0.491261	0.711403	35.7563	35.627	34.9638	35.7408	35.0367	35.3307	35.4194	35.7578	35.8962	35.6011	35.9704
P63101	14-3-3 protein zeta/delta	Ywhaz	0.337168	0.95183	-0.028285	0.980585	0.55663	0.985501	-0.033676	0.976928	0.922322	0.991616	-0.00539093	0.99627	0.844925	0.98517	-0.00832176	0.994248	0.966287	1	-0.00155894	0.99892	0.953107	0.995667	-0.00499598	0.996543	0.970231	0.998597	-0.00343704	0.99762	0.260484	0.954387	0.060854	1.04308	0.580632	1	0.0657387	1.04662	36.1119	36.1337	36.1186	36.112	36.1849	36.1828	36.1775	36.0604	36.131	36.1547	36.2296
Q68FD5	Clathrin heavy chain 1	Cltc	0.484702	0.951288	0.0317371	1.02224	0.268311	0.95651	-0.0671467	0.954524	0.118462	0.872995	-0.0988838	0.933755	0.325759	0.826022	-0.112261	0.925137	0.726897	0.995141	0.0247167	1.01728	0.445309	0.956619	-0.0652491	0.95578	0.373691	0.980388	-0.0899658	0.939545	0.87143	1	-0.0137316	0.990527	0.941625	1	0.00856336	1.00595	36.092	36.1483	36.0748	36.0346	36.0126	36.0823	36.1749	36.0093	35.9994	36.0801	36.2394
Q04447	Creatine kinase B-type	Ckb	0.441571	0.941556	-0.044179	0.969842	0.178809	0.942001	-0.0844126	0.943168	0.501556	0.952667	-0.0402336	0.972497	0.419658	0.945449	0.031208	1.02187	0.36408	1	-0.0784213	0.947093	0.0354905	0.831947	-0.166283	0.891136	0.352017	0.977923	-0.0878614	0.940917	0.885476	1	-0.0144005	0.990068	0.11577	1	-0.13347	0.911636	36.1745	36.1126	36.0587	36.0104	36.1104	36.1389	36.1009	36.2761	36.0401	36.1209	36.0659
Q62261	Spectrin beta chain, non-erythrocytic 1	Sptbn1	0.104855	0.936432	-0.0477283	0.967458	0.263208	0.971631	-0.0435505	0.970264	0.884458	0.993567	0.00417786	1.0029	0.955595	0.996096	0.00252342	1.00175	0.360777	1	-0.0410055	0.971977	0.528243	0.982692	-0.0357246	0.975542	0.907894	0.997148	0.00528081	1.00367	0.460763	0.990535	0.0215136	1.01502	0.701428	1	0.024271	1.01697	36.086	36.0109	36.127	36.0975	36.149	36.1329	36.0811	36.1393	36.1381	36.0991	36.1778
P46660	Alpha-internexin	Ina	0.346906	0.820339	-0.170742	0.888386	0.0715964	0.629327	-0.489054	0.712492	0.168197	0.698667	-0.318312	0.802008	0.156137	0.606698	-0.315069	0.803812	0.0921462	0.88934	-0.39247	0.761824	0.0735736	0.511359	-0.712944	0.610074	0.270423	0.895177	-0.320474	0.800807	0.0107104	0.730742	-0.437553	0.738386	0.274122	1	-0.442958	0.735625	35.5738	35.4647	35.0654	35.6309	35.3359	35.3479	35.6673	35.8692	35.8019	35.5154	35.7985
P52480	Pyruvate kinase PKM	Pkm	0.0986428	0.940692	-0.0377243	0.97419	0.547874	0.993796	-0.0201363	0.98614	0.553043	0.978121	0.017588	1.01227	0.966828	0.996379	-0.00242424	0.998321	0.404352	0.997668	-0.0229645	0.984208	0.838366	0.996702	0.00796509	1.00554	0.427474	0.998564	0.0309296	1.02167	0.583417	0.990397	0.0172507	1.01203	0.404795	1	0.0506045	1.0357	36.0172	36.0244	36.086	36.0354	36.0627	36.1149	36.072	36.0987	36.044	36.1358	36.0467
O08599	Syntaxin-binding protein 1	Stxbp1	0.68545	0.959694	-0.0267511	0.981628	0.0609268	0.803532	-0.276882	0.825373	0.0472234	0.683812	-0.25013	0.84082	0.0754155	0.71289	-0.166033	0.89129	0.479649	1	-0.0640691	0.956562	0.108614	0.67096	-0.370265	0.773641	0.1718	0.875778	-0.306196	0.808772	0.890574	1	0.0125097	1.00871	0.610949	1	-0.127653	0.915319	36.091	35.8637	36.0232	35.8782	36.0058	35.9908	35.8781	36.1015	35.9777	36.2121	36.1165
P63017	Heat shock cognate 71 kDa protein	Hspa8	0.595519	0.959143	0.0253443	1.01772	0.143229	0.951412	0.0675524	1.04794	0.333388	0.948223	0.0422081	1.02969	0.782205	0.983699	0.012991	1.00905	0.751859	0.995468	0.0239309	1.01673	0.171017	0.915484	0.0856171	1.06114	0.380661	0.975701	0.0616862	1.04368	0.779563	0.989959	0.0224152	1.01566	0.220424	1	0.0711104	1.05052	36.0893	36.0322	36.1289	35.9823	36.0617	36.0309	36.118	36.0293	35.9242	35.9951	36.0715
P17182	Alpha-enolase	Eno1	0.743491	0.987252	-0.00902195	0.993766	0.622514	0.993798	-0.0244394	0.983203	0.718429	0.983107	-0.0154175	0.98937	0.364819	0.867342	-0.084507	0.943107	0.892431	0.997228	0.00344976	1.00239	0.473775	0.983721	0.0340919	1.02391	0.5238	0.999308	0.0306422	1.02147	0.670045	0.98993	-0.0168692	0.988375	0.253508	1	0.09828	1.0705	35.803	35.8694	35.9111	35.859	35.8227	35.8963	35.9041	35.843	35.8821	35.8814	36.0067
P08551	Neurofilament light polypeptide	Nefl	0.758133	0.94685	-0.0650597	0.955906	0.0728984	0.581053	-0.575005	0.671284	0.0559349	0.539253	-0.509945	0.702249	0.0182504	0.344107	-0.493034	0.710529	0.254601	0.95294	-0.318127	0.802111	0.085813	0.507752	-0.839345	0.558897	0.171726	0.844911	-0.521219	0.696783	0.0454631	0.656187	-0.415395	0.749814	0.335928	1	-0.443579	0.735308	35.48	35.2177	34.7178	35.4616	35.0192	35.051	35.2595	35.5737	35.5183	35.4625	35.5938
Q8R1M2;Q8CGP4;C0HKE9;C0HKE8;C0HKE7;C0HKE6;C0HKE5;C0HKE4;C0HKE3;C0HKE2;C0HKE1;Q8CGP6;Q8CGP7;Q8CGP5;Q8BFU2	Histone H2A.J;Histone H2A;Histone H2A type 1-P	H2aj;H2ac1;H	0.64025	0.892643	0.143647	1.10469	0.341302	0.889589	-0.231165	0.851947	0.209025	0.69626	-0.374812	0.771206	0.537288	0.732988	-0.509953	0.702246	0.784596	1	-0.0685641	0.953587	0.302298	0.802452	-0.353283	0.782801	0.352893	0.906432	-0.284719	0.820902	0.601914	0.884641	-0.294259	0.815491	0.86108	1	-0.0690257	0.953282	35.48	34.8575	35.4716	34.9767	35.5107	34.2419	34.9382	35.4229	35.1504	35.6598	35.1126
P39053	Dynamin-1	Dnm1	0.433328	0.95254	-0.030759	0.978905	0.117754	0.947696	-0.0699993	0.952638	0.375107	0.952756	-0.0392403	0.973167	0.200794	0.893132	-0.0556126	0.962186	0.920617	0.996733	0.00494766	1.00344	0.550238	0.990711	-0.0233777	0.983926	0.53713	0.999549	-0.0283254	0.980558	0.178516	0.915987	0.0823701	1.05876	0.0512153	1	0.109657	1.07897	35.8252	35.8423	35.8833	35.783	35.917	35.9102	35.8953	35.7691	35.8293	35.9986	35.9398
P48962	ADP/ATP translocase 1	Slc25a4	0.0886184	0.805932	-0.141424	0.906624	0.174313	0.913521	-0.115856	0.922835	0.764463	0.976229	0.0255684	1.01788	0.162244	0.700121	0.211473	1.15787	0.509177	1	-0.0438143	0.970087	0.230247	0.90035	-0.142183	0.906147	0.350352	0.973082	-0.0983683	0.934089	0.0244658	0.700685	0.210484	1.15708	0.5041	1	-0.0993576	0.933449	35.7422	35.7347	35.7569	35.8961	36.0843	36.0161	35.8107	35.8022	35.9062	35.93	35.7474
P43006	Excitatory amino acid transporter 2	Slc1a2	0.968423	0.996701	-0.0019062	0.99868	0.891881	0.995157	0.00957375	1.00666	0.869579	0.990896	0.0114799	1.00799	0.939514	0.990078	0.00792503	1.00551	0.841998	0.995424	0.0127729	1.00889	0.803924	0.989256	0.0266228	1.01862	0.903317	0.999669	0.0138499	1.00965	0.612646	0.97883	0.0461756	1.03252	0.717242	1	0.0521005	1.03677	35.68	35.7192	35.6043	35.6711	35.6304	35.7661	35.7077	35.6962	35.5523	35.6275	35.7532
P18872	Guanine nucleotide-binding protein G(o) subunit alpha	Gnao1	0.110776	0.844047	-0.0939098	0.93698	0.075282	0.872906	-0.201569	0.869604	0.247732	0.876258	-0.107659	0.928093	0.272623	0.892332	0.0603352	1.04271	0.493531	1	-0.0531756	0.963812	0.0926049	0.741038	-0.272831	0.827694	0.144194	0.888466	-0.219655	0.858771	0.354143	0.945603	0.0732841	1.05211	0.248094	1	-0.206706	0.866513	35.4741	35.5045	35.4362	35.6187	35.6865	35.606	35.4898	35.5788	35.6503	35.5874	35.5844
P28652	Calcium/calmodulin-dependent protein kinase type II subunit beta	Camk2b	0.0259554	0.574887	0.431741	1.34886	0.183853	0.880577	0.215475	1.16109	0.196248	0.77751	-0.216265	0.860791	0.0101412	0.34075	-0.495655	0.70924	0.190355	0.931591	0.333272	1.25987	0.236192	0.78994	0.303267	1.23394	0.904383	1	-0.0300051	0.979417	0.273825	0.775462	-0.279972	0.823607	0.463934	1	0.185678	1.13735	35.8555	35.9405	36.1288	35.6595	35.3189	35.2739	35.3858	35.4451	35.8981	35.837	35.7471
P0DP28;P0DP27;P0DP26;Q9D6P8	Calmodulin-3;Calmodulin-2;Calmodulin-1	Calm3;Calm2;Calm1	0.631674	0.94142	0.0532076	1.03757	0.59247	0.969609	0.0772562	1.05501	0.859377	0.978727	0.0240486	1.01681	0.216896	0.671657	-0.271793	0.828289	0.853655	1	0.0267042	1.01868	0.149053	0.788797	0.247981	1.18754	0.176381	0.89594	0.221277	1.16576	0.547692	0.933899	-0.111422	0.925675	0.0572726	1	0.381648	1.30283	35.7945	35.7076	36.048	35.8448	35.5771	35.8803	35.8055	35.6991	36.0157	36.0179	35.983
P14094	Sodium/potassium-transporting ATPase subunit beta-1	Atp1b1	0.0275963	0.91362	-0.0580502	0.960561	0.453587	0.980814	-0.036903	0.974745	0.610195	0.976277	0.0211472	1.01477	0.695545	0.959486	0.0292664	1.02049	0.220725	1	-0.0426915	0.970842	0.698988	0.99121	-0.0269572	0.981488	0.808086	1	0.0157344	1.01097	0.238447	0.98491	0.02937	1.02057	0.871188	1	0.015838	1.01104	35.3984	35.3626	35.4237	35.4522	35.4995	35.4703	35.4776	35.4564	35.4326	35.3926	35.5187
P46460	Vesicle-fusing ATPase	Nsf	0.921185	0.987041	-0.00587463	0.995936	0.458488	0.979804	-0.0402115	0.972512	0.602386	0.962528	-0.0343369	0.976481	0.398677	0.926278	-0.0424442	0.971008	0.671458	1	0.0369479	1.02594	0.907988	0.996935	0.00801595	1.00557	0.775511	1	-0.0289319	0.980146	0.42549	0.933509	0.0909996	1.06511	0.272738	1	0.104512	1.07513	35.4615	35.5069	35.5264	35.4285	35.5152	35.5674	35.5056	35.3016	35.5437	35.5536	35.6139
P03995	Glial fibrillary acidic protein	Gfap	0.913316	0.983661	-0.0196299	0.986486	1.80037e-05	0.0622222	1.23142	2.34798	1.88293e-05	0.0418182	1.25105	2.38015	0.00142524	0.323902	1.29367	2.45151	0.751334	1	0.0824636	1.05882	0.00127725	0.224308	1.3051	2.47101	0.00288666	0.792	1.22264	2.33373	0.301475	0.773706	0.300226	1.23134	0.0156061	1	0.229195	1.17218	36.7362	36.3573	36.7541	36.8811	36.8343	36.9296	36.5782	36.9034	36.2635	35.5994	35.5772
P08249	Malate dehydrogenase, mitochondrial	Mdh2	0.84669	0.986551	-0.0065691	0.995457	0.374944	0.969803	0.0507788	1.03582	0.285686	0.934355	0.0573479	1.04055	0.195918	0.720704	0.176529	1.13016	0.156008	1	0.0438983	1.0309	0.59327	0.989357	0.0217921	1.01522	0.594652	1	-0.0221062	0.984794	0.0696084	0.903783	0.081639	1.05822	0.237108	1	-0.116996	0.922106	35.3635	35.4651	35.433	35.4062	35.4494	35.4957	35.4028	35.3546	35.4153	35.2066	35.3853
P62874	Guanine nucleotide-binding protein G(I)/G(S)/G(T) subunit beta-1	Gnb1	0.053718	0.819448	-0.121338	0.919335	0.10829	0.964455	-0.0550259	0.962577	0.224881	0.922069	0.0663116	1.04704	0.120318	0.720765	0.165398	1.12148	0.241225	1	-0.0452855	0.969098	0.261173	0.968885	-0.0450312	0.969269	0.995419	1	0.000254313	1.00018	0.035899	0.780655	0.164433	1.12073	0.990566	0.999908	-0.000710169	0.999508	35.2399	35.2993	35.2483	35.2955	35.5259	35.4556	35.3527	35.357	35.2692	35.2728	35.3779
O88935	Synapsin-1	Syn1	0.915682	0.988315	-0.00498734	0.996549	0.655584	0.987529	-0.0298096	0.97955	0.710611	0.975367	-0.0248222	0.982942	0.596094	0.887367	-0.0887146	0.94036	0.949747	0.996192	0.00461706	1.00321	0.604577	0.989273	0.0223897	1.01564	0.800723	1	0.0177727	1.0124	0.898858	1	0.0116736	1.00812	0.347635	1	0.118161	1.08535	35.375	35.3326	35.4349	35.4168	35.3617	35.442	35.5111	35.3134	35.346	35.3543	35.6268
Q99KI0	Aconitate hydratase, mitochondrial	Aco2	0.433398	0.963169	-0.0195017	0.986573	0.886879	0.996724	-0.00582142	0.995973	0.705416	0.985353	0.0136803	1.00953	0.464116	0.957795	0.0263023	1.0184	0.417807	1	-0.0310313	0.97872	0.673504	0.991232	-0.0257657	0.982299	0.928162	0.997032	0.00526555	1.00366	0.357838	0.985091	-0.0319767	0.978079	0.49246	1	-0.0530135	0.963921	35.3344	35.3423	35.3837	35.2923	35.3278	35.3492	35.3957	35.3891	35.3266	35.2849	35.3395
P84244;P02301	Histone H3.3;Histone H3.3C	H3-3b;H3-5	0.403783	0.825058	-0.184003	0.880257	0.68754	0.973921	-0.0617382	0.958109	0.582583	0.909062	0.122265	1.08844	0.338433	0.672908	0.390293	1.31066	0.796729	1	0.0550016	1.03886	0.993299	0.998635	-0.00141907	0.999017	0.813247	0.998751	-0.0564206	0.961647	0.104964	0.660515	0.574574	1.48924	0.67304	1	0.12786	1.09267	35.0326	34.8981	35.1817	35.128	35.4653	35.7123	34.8054	35.3723	34.865	35.4859	34.9111
Q64332	Synapsin-2	Syn2	0.883236	0.983277	0.0157299	1.01096	0.606558	0.969971	0.0614452	1.04351	0.704589	0.957311	0.0457153	1.03219	0.0693384	0.795104	-0.104084	0.930395	0.673019	1	0.0720177	1.05119	0.0766605	0.791106	0.217599	1.1628	0.342929	0.949606	0.145582	1.10618	0.599009	0.948539	0.100171	1.0719	0.003801	1	0.349836	1.27442	35.3728	35.4131	35.5994	35.3006	35.4721	35.4596	35.5987	35.1404	35.3579	35.5417	35.5982
P50516	V-type proton ATPase catalytic subunit A	Atp6v1a	0.587209	0.956729	0.0276388	1.01934	0.622834	0.982959	0.0398642	1.02802	0.876172	0.990179	0.0122253	1.00851	0.471259	0.915429	-0.04743	0.967659	0.62615	1	0.0402031	1.02826	0.439375	0.929679	0.0921987	1.06599	0.692475	0.992859	0.0519956	1.0367	0.782118	0.989505	0.0269101	1.01883	0.422557	1	0.126336	1.09152	35.2204	35.2002	35.2968	35.1857	35.2352	35.1934	35.3185	35.0914	35.1522	35.2121	35.3113
P17751	Triosephosphate isomerase	Tpi1	0.111328	0.844002	-0.0923666	0.937983	0.75778	0.995607	-0.020233	0.986073	0.226002	0.913509	0.0721336	1.05127	0.0910651	0.862679	0.0713005	1.05066	0.661546	0.999337	-0.0277354	0.980959	0.616377	0.980086	0.0449537	1.03165	0.395551	0.980651	0.0726891	1.05168	0.112685	0.882996	0.100014	1.07178	0.3397	1	0.101403	1.07282	35.0366	35.2204	35.057	35.1279	35.2628	35.263	35.1156	35.1421	35.2308	35.2147	35.1684
P17710	Hexokinase-1	Hk1	0.215868	0.938927	0.0451933	1.03182	0.0918166	0.92082	0.0926893	1.06636	0.373834	0.950034	0.047496	1.03347	0.559184	0.90102	0.0643101	1.04558	0.111112	1	0.0774167	1.05513	0.0960891	0.900294	0.113703	1.082	0.595897	0.998693	0.0362867	1.02547	0.232504	0.933892	0.0764999	1.05446	0.640362	1	0.0484765	1.03417	35.1416	35.1624	35.1541	35.1279	35.1202	35.1742	35.1402	35.0164	35.0555	34.9943	35.1715
P09411	Phosphoglycerate kinase 1	Pgk1	0.942288	0.996529	-0.00137615	0.999047	0.877055	0.99536	-0.00841656	0.994183	0.878736	0.991983	-0.00704041	0.995132	0.0703189	0.840697	-0.0814838	0.945085	0.558164	1	0.0132612	1.00923	0.393153	0.961681	0.0558497	1.03947	0.487105	0.990872	0.0425886	1.02996	0.76509	1	0.0058492	1.00406	0.16763	1	0.129922	1.09423	34.9576	35.0329	34.9692	35.0182	34.9795	35.0192	35.0086	34.9896	34.9823	35.0922	35.0695
Q9QXS1	Plectin	Plec	0.905038	0.985693	-0.0156284	0.989226	0.410534	0.936111	-0.116875	0.922183	0.367052	0.892763	-0.101247	0.932227	0.417238	0.804055	-0.149931	0.901294	0.396321	1	-0.148337	0.90229	0.289256	0.861801	-0.217127	0.860277	0.489012	0.976619	-0.0687904	0.953437	0.0129717	0.666839	-0.271177	0.828643	0.300339	1	-0.190036	0.876584	34.7973	34.7792	34.4017	34.9201	34.5206	34.6344	34.884	34.8087	34.8533	34.591	34.8639
Q9QYR6	Microtubule-associated protein 1A	Map1a	0.294303	0.949379	-0.0301554	0.979315	0.910579	0.996344	-0.00596333	0.995875	0.584293	0.974707	0.024192	1.01691	0.0344633	0.879336	-0.0607319	0.958778	0.494123	0.997586	-0.0295041	0.979757	0.448278	0.967469	0.0513039	1.0362	0.212927	0.977357	0.080808	1.05761	0.481168	0.989168	-0.0213992	0.985277	0.165364	1	0.120141	1.08684	34.9891	35.0282	35.0834	34.9662	35.0439	35.0242	35.0334	35.0378	35.0951	35.1009	35.0887
Q9D6F9	Tubulin beta-4A chain	Tubb4a	0.0325162	0.556371	-0.403945	0.755789	0.269473	0.876461	-0.320062	0.801036	0.74976	0.948323	0.0838829	1.05987	0.748403	0.88479	0.181746	1.13426	0.25297	0.968566	-0.276173	0.825779	0.468489	0.900853	-0.257531	0.836518	0.960166	0.997097	0.0186412	1.013	0.425215	0.854927	0.22299	1.16715	0.917358	1	0.0598857	1.04238	34.6871	34.8067	35.0436	34.6738	35.4512	35.2299	34.865	35.4573	35.0303	35.6406	34.677
Q68FG2	Spectrin beta chain	Sptbn2	0.230532	0.901016	-0.0722822	0.951132	0.875841	0.994906	0.0310511	1.02176	0.569164	0.917903	0.103333	1.07425	0.418411	0.848468	-0.103304	0.930899	0.411262	1	-0.0769895	0.948034	0.567574	0.910752	0.164102	1.12047	0.427323	0.912097	0.241091	1.18189	0.958215	1	-0.00606918	0.995802	0.398668	1	0.338326	1.26429	34.8646	34.8091	34.9162	34.8411	34.878	34.9748	35.0597	34.7913	34.9462	34.9397	35.1197
P61982	14-3-3 protein gamma	Ywhag	0.0710072	0.849288	-0.0873615	0.941243	0.177346	0.966347	-0.05658	0.961541	0.403079	0.962785	0.0307816	1.02157	0.0855613	0.843801	0.0801315	1.05711	0.189809	1	-0.0770543	0.947991	0.216671	0.924025	-0.0791728	0.9466	0.969703	0.997225	-0.00211843	0.998533	0.211271	0.932069	0.0734533	1.05223	0.878119	1	-0.00879669	0.993921	34.9792	34.8631	34.9743	34.8714	35.0768	35.0301	34.9532	35.0462	34.9406	34.9824	34.9642
O88737	Protein bassoon	Bsn	0.153341	0.725048	0.289895	1.22255	0.644622	0.973246	0.0804996	1.05738	0.339635	0.812873	-0.209396	0.864899	0.222033	0.465009	-0.618109	0.651524	0.619955	1	0.0906181	1.06483	0.456012	0.910783	0.153698	1.11242	0.791299	0.995037	0.0630798	1.04469	0.178037	0.683913	-0.441788	0.736222	0.479883	1	0.239401	1.1805	35.1222	35.1281	35.0995	34.8682	34.7214	34.2777	35.1691	34.6652	34.9896	34.8431	35.3922
P15105	Glutamine synthetase	Glul	0.222146	0.91844	-0.0630522	0.957237	0.121606	0.917068	-0.101195	0.932261	0.512982	0.95711	-0.0381424	0.973908	0.844531	0.972952	0.0226841	1.01585	0.383536	1	-0.0599988	0.959265	0.115953	0.896125	-0.138692	0.908342	0.362009	0.980399	-0.0786934	0.946915	0.531866	0.967686	0.0516987	1.03648	0.65579	1	-0.0496788	0.966151	34.9127	34.7691	34.886	34.8716	35.0035	34.9043	34.8226	34.9918	34.8923	35.0203	34.8422
P17183	Gamma-enolase	Eno2	0.0327996	0.814544	-0.118705	0.921014	0.0891821	0.900797	-0.116124	0.922663	0.967314	0.994912	0.00258102	1.00179	0.769311	0.972834	0.0201225	1.01405	0.16383	1	-0.0652199	0.9558	0.427944	0.941733	-0.0743332	0.949781	0.918681	0.996913	-0.00911331	0.993703	0.112163	0.86342	0.115955	1.08369	0.469143	1	0.0867195	1.06195	34.7074	34.7009	34.7156	34.7909	34.9699	34.8641	34.7814	34.8531	34.7686	34.8685	34.9252
P20357	Microtubule-associated protein 2	Map2	0.165087	0.880027	0.0763302	1.05433	0.166608	0.899997	0.153151	1.112	0.428739	0.922257	0.0768204	1.05469	0.76228	0.956416	0.0352955	1.02477	0.10681	1	0.115585	1.08341	0.15095	0.822935	0.220089	1.16481	0.444925	0.977308	0.104504	1.07512	0.125242	0.861559	0.116472	1.08408	0.349066	1	0.18568	1.13735	35.0709	34.9836	35.1195	35.0215	35.0753	35.0096	34.9637	34.8494	34.9648	34.9106	35.1037
P17742	Peptidyl-prolyl cis-trans isomerase A	Ppia	0.0653369	0.823734	-0.114605	0.923635	0.682803	0.988139	0.0307713	1.02156	0.0355619	0.789243	0.145377	1.10602	0.0944802	0.69191	0.192381	1.14265	0.355765	1	-0.062322	0.957721	0.646394	0.974078	0.0517184	1.0365	0.296547	0.96409	0.11404	1.08225	0.433675	0.965814	0.0499528	1.03523	0.827376	1	-0.0283877	0.980515	34.6597	34.8805	34.7	34.7862	34.9557	34.8467	34.8223	34.8218	34.9096	34.6757	34.7419
P06745	Glucose-6-phosphate isomerase	Gpi	0.82453	0.990703	-0.00340881	0.99764	0.907323	0.996126	0.0057724	1.00401	0.82653	0.991931	0.00918121	1.00638	0.306203	0.96293	0.0222473	1.01554	0.993581	0.999458	0.000172933	1.00012	0.993485	0.998334	0.000643412	1.00045	0.99508	1	0.000470479	1.00033	0.216396	0.997472	-0.0114956	0.992064	0.744432	1	-0.0332724	0.977201	34.7426	34.7368	34.7978	34.7915	34.7641	34.7633	34.7865	34.7686	34.7705	34.7251	34.7578
P05202	Aspartate aminotransferase, mitochondrial	Got2	0.867207	0.987996	0.0064806	1.0045	0.273441	0.970431	0.0482203	1.03399	0.224155	0.95101	0.0417397	1.02935	0.887762	0.98821	0.00712395	1.00495	0.464836	1	0.0353266	1.02479	0.0891277	0.904787	0.100143	1.07188	0.188312	0.980578	0.0648168	1.04595	0.810552	0.99989	0.0122617	1.00854	0.188146	1	0.0699546	1.04968	34.752	34.9137	34.8039	34.8259	34.785	34.8645	34.8536	34.8251	34.7587	34.7974	34.8378
P14152	Malate dehydrogenase, cytoplasmic	Mdh1	0.852043	0.986559	-0.0113647	0.992154	0.678397	0.990118	0.0278183	1.01947	0.3031	0.953274	0.039183	1.02753	0.203341	0.816972	0.104029	1.07477	0.539635	1	-0.040376	0.972401	0.568811	0.976842	-0.0444234	0.969677	0.931839	1	-0.00404739	0.997198	0.326181	0.969711	0.0437406	1.03078	0.363851	1	-0.0643355	0.956386	34.8711	34.5693	34.7317	34.7542	34.7268	34.8116	34.7517	34.7264	34.6983	34.7015	34.6289
P68033	Actin, alpha cardiac muscle 1	Actc1	0.371302	0.802861	0.258715	1.19641	0.823229	0.983677	0.0727028	1.05169	0.51769	0.869505	-0.186012	0.879032	0.352083	0.651883	0.48946	1.40392	0.076453	0.776776	0.645295	1.56406	0.978616	0.996071	0.00896835	1.00624	0.0734289	0.70874	-0.636327	0.643349	0.0586614	0.724939	0.591571	1.50689	0.284124	1	-0.534216	0.690534	34.5519	34.7019	35.4309	35.3224	35.1623	35.0337	34.3813	34.3342	34.8038	35.0103	34.2067
Q6PIE5	Sodium/potassium-transporting ATPase subunit alpha-2	Atp1a2	0.534691	0.952273	-0.0369137	0.974738	0.619243	0.980531	-0.0445194	0.969613	0.934983	0.990581	-0.00760574	0.994742	0.13986	0.894476	0.0542393	1.03831	0.499197	1	-0.0644239	0.956327	0.38597	0.909366	-0.11326	0.924497	0.753435	0.997403	-0.0488358	0.966716	0.633679	0.966674	-0.0592531	0.959761	0.361442	1	-0.162328	0.893582	34.7756	34.7579	34.7544	34.7688	34.7574	34.7737	34.7773	34.9929	34.7041	34.6901	34.7325
P63328	Serine/threonine-protein phosphatase 2B catalytic subunit alpha isoform	Ppp3ca	0.0870341	0.84399	-0.0905621	0.939157	0.715652	0.978139	0.0588177	1.04161	0.315494	0.843718	0.14938	1.10909	0.733636	0.964651	0.0249557	1.01745	0.424022	1	-0.0503922	0.965674	0.446441	0.904181	0.181937	1.13441	0.347211	0.91253	0.232329	1.17473	0.423871	0.952173	0.0662371	1.04698	0.39562	1	0.27361	1.20883	34.5719	34.5705	34.6271	34.6821	34.6908	34.7956	34.7227	34.5837	34.7244	34.7548	34.6817
Q9JHU4	Cytoplasmic dynein 1 heavy chain 1	Dync1h1	0.189766	0.947112	-0.0360897	0.975295	0.178932	0.921665	-0.0961124	0.935551	0.3446	0.933814	-0.0600227	0.959249	0.759305	0.985215	-0.00845528	0.994156	0.68093	0.999297	-0.0145404	0.989972	0.335851	0.912751	-0.108941	0.927268	0.417323	0.97899	-0.094401	0.936661	0.535788	0.985979	0.0310758	1.02177	0.69831	1	-0.05487	0.962681	34.6715	34.7217	34.7041	34.698	34.7315	34.7756	34.6767	34.7843	34.7064	34.7717	34.7523
P07901	Heat shock protein HSP 90-alpha	Hsp90aa1	0.939375	0.993377	-0.003302	0.997714	0.83095	0.995612	0.0083519	1.00581	0.818732	0.988493	0.0116539	1.00811	0.267386	0.897305	0.0541096	1.03822	0.753533	1	0.0197105	1.01376	0.961452	0.997776	0.00306066	1.00212	0.850242	1	-0.0166499	0.988526	0.477449	0.957031	0.0632915	1.04485	0.929186	1	-0.00746791	0.994837	34.7836	34.7849	34.7804	34.7579	34.7878	34.8481	34.8334	34.7892	34.6415	34.745	34.7827
P01831	Thy-1 membrane glycoprotein	Thy1	0.673957	0.932185	0.0929146	1.06652	0.864946	0.99272	-0.0317177	0.978255	0.603444	0.90977	-0.124632	0.917238	0.304809	0.641195	-0.447502	0.733311	0.758383	1	-0.0858472	0.942231	0.983521	0.997119	0.0047671	1.00331	0.781412	0.988009	0.0906143	1.06482	0.211419	0.686011	-0.488373	0.712828	0.89482	1	0.049743	1.03508	34.5735	34.8323	34.6134	34.4739	34.2313	34.2433	35.194	34.5732	34.41	34.3577	35.012
Q61879	Myosin-10	Myh10	0.588331	0.940107	0.052746	1.03724	0.285302	0.922458	-0.108997	0.927232	0.160935	0.810616	-0.161743	0.893944	0.354168	0.725553	-0.240679	0.846347	0.49179	1	-0.0582695	0.960415	0.219404	0.887036	-0.167389	0.890453	0.416333	0.973102	-0.109119	0.927154	0.230999	0.816843	-0.196105	0.872904	0.732277	1	-0.0645459	0.956246	34.6675	34.5713	34.4419	34.5984	34.2579	34.5408	34.6899	34.4839	34.6126	34.497	34.7831
Q60932	Voltage-dependent anion-selective channel protein 1	Vdac1	0.819491	0.959035	-0.0333305	0.977162	0.939291	0.995911	-0.013369	0.990776	0.887131	0.98494	0.0199615	1.01393	0.0190617	0.671627	0.17033	1.12532	0.818285	1	0.0451342	1.03178	0.902168	0.992215	-0.0351499	0.97593	0.727889	0.982278	-0.0802841	0.945871	0.0445724	0.682754	0.276398	1.21117	0.928789	1	0.0257835	1.01803	34.7014	34.2606	34.6015	34.857	34.7857	34.8229	34.5297	34.4173	34.6366	34.619	34.6489
P62259	14-3-3 protein epsilon	Ywhae	0.943337	0.994554	-0.00243587	0.998313	0.126134	0.942382	0.0817202	1.05828	0.101713	0.888767	0.084156	1.06007	0.739901	0.958856	-0.0307159	0.978934	0.431031	0.998827	-0.0262629	0.981961	0.0261469	0.867698	0.134474	1.09769	0.00537814	0.903856	0.160737	1.11786	0.166741	0.934261	-0.0723826	0.951066	0.135964	1	0.119071	1.08604	34.7251	34.7399	34.7966	34.7002	34.6495	34.7495	34.7661	34.7565	34.7929	34.6669	34.7934
P14873	Microtubule-associated protein 1B	Map1b	0.790642	0.987102	-0.00869446	0.993992	0.58638	0.988012	-0.0294739	0.979778	0.677575	0.977281	-0.0207794	0.9857	0.172142	0.88681	-0.0623989	0.95767	0.754488	0.999967	-0.0157407	0.989149	0.914785	0.996863	-0.0087738	0.993937	0.935422	0.997893	0.00696691	1.00484	0.972827	1	-0.00196266	0.998641	0.518945	1	0.0674032	1.04783	34.6702	34.7019	34.6177	34.6158	34.6295	34.6883	34.6413	34.6081	34.7333	34.7159	34.7267
F6SEU4	Ras/Rap GTPase-activating protein SynGAP	Syngap1	0.247811	0.82037	0.14983	1.10944	0.398409	0.899643	0.237446	1.1789	0.72121	0.945228	0.087616	1.06261	0.16279	0.579562	-0.339308	0.79042	0.752924	1	0.0579236	1.04097	0.270583	0.759303	0.430155	1.34738	0.333801	0.890915	0.372232	1.29435	0.364858	0.856169	-0.171931	0.887654	0.292065	1	0.539609	1.45358	35.1681	35.1524	35.2311	34.8433	34.8653	34.8262	35.2034	34.7812	35.0685	35.0296	35.3406
P63318	Protein kinase C gamma type	Prkcg	0.787134	0.9689	0.0205303	1.01433	0.869834	0.991232	0.0167759	1.0117	0.970856	0.993483	-0.00375443	0.997401	0.466923	0.852733	-0.10466	0.930024	0.376301	1	0.0910009	1.06511	0.0784325	0.857309	0.154517	1.11305	0.526671	0.980619	0.063516	1.04501	0.358067	0.886173	0.123481	1.08936	0.052065	1	0.291657	1.22405	34.6882	34.7462	34.8625	34.7088	34.7364	34.8735	34.6354	34.5737	34.8353	35.005	34.8143
P18760	Cofilin-1	Cfl1	0.31428	0.939	-0.0503124	0.965727	0.800687	0.991297	-0.0116566	0.991953	0.231904	0.951491	0.0386559	1.02716	0.362725	0.930276	0.0391731	1.02752	0.517027	1	-0.0507863	0.96541	0.866648	0.992387	-0.0124753	0.99139	0.482205	0.995249	0.038311	1.02691	0.740411	0.990542	-0.0190392	0.98689	0.683771	1	-0.0199013	0.9863	34.5622	34.6937	34.5972	34.4815	34.593	34.6521	34.6851	34.6713	34.5684	34.5676	34.5992
G5E829	Plasma membrane calcium-transporting ATPase 1	Atp2b1	0.289831	0.937106	-0.0483294	0.967056	0.705435	0.985261	0.0374159	1.02627	0.35588	0.90898	0.0857452	1.06124	0.579841	0.908637	-0.0615368	0.958243	0.223699	1	-0.0820847	0.944692	0.452497	0.922047	0.101849	1.07315	0.217105	0.920469	0.183933	1.13598	0.277042	0.931797	-0.0789007	0.946779	0.390498	1	0.166569	1.12239	34.5659	34.4924	34.5656	34.6133	34.5423	34.5782	34.7034	34.5526	34.6616	34.5296	34.7141
Q9ERD7	Tubulin beta-3 chain	Tubb3	0.215794	0.800448	-0.183759	0.880406	0.0986772	0.72983	-0.374861	0.77118	0.386067	0.835081	-0.191102	0.875936	0.759714	0.920825	0.0751534	1.05347	0.64494	1	-0.0912615	0.938702	0.172583	0.669801	-0.459867	0.727053	0.327031	0.896758	-0.368605	0.774531	0.5284	0.88807	0.181705	1.13422	0.537067	1	-0.262053	0.8339	34.4598	34.5124	34.5128	34.5921	34.9489	34.6752	34.2845	34.8988	34.7077	34.9023	34.5715
P27661	Histone H2AX	H2ax	0.49931	0.846462	-0.149519	0.901551	0.909122	0.991135	-0.0212238	0.985396	0.586686	0.909423	0.128295	1.093	0.204634	0.632263	0.341272	1.26687	0.911337	0.999618	0.0228297	1.01595	0.970676	0.995003	0.00914001	1.00636	0.963827	0.998631	-0.0136897	0.990556	0.0858432	0.704289	0.585807	1.50088	0.516442	1	0.230845	1.17352	34.5952	34.2343	34.4888	34.3188	34.8602	34.9603	34.1575	34.6791	34.1368	34.746	34.392
P43274	Histone H1.4	H1-4	0.842924	0.959263	-0.0399992	0.972655	0.520583	0.954515	-0.0882574	0.940658	0.797319	0.964898	-0.0482582	0.967103	0.411261	0.81913	0.133514	1.09696	0.954525	0.998899	0.0159149	1.01109	0.446583	0.910292	-0.153525	0.899051	0.595201	0.971438	-0.16944	0.889188	0.424627	0.820468	0.300854	1.23187	0.992863	1	-0.00210063	0.998545	34.4484	34.0589	34.1551	34.358	34.3824	34.5688	33.8328	34.6545	34.0369	34.4322	34.252
P12960	Contactin-1	Cntn1	0.705499	0.952594	-0.0453545	0.969052	0.224447	0.899187	-0.165528	0.891602	0.41882	0.884696	-0.120174	0.920077	0.41776	0.733632	-0.262474	0.833657	0.413869	1	-0.122799	0.918404	0.319608	0.900698	-0.148106	0.902435	0.89096	1	-0.0253067	0.982612	0.213411	0.753983	-0.261955	0.833957	0.92559	1	-0.0247873	0.982966	34.4909	34.6441	34.6577	34.4991	34.4061	34.5162	34.9575	34.5312	34.6806	34.4704	34.9769
P68368	Tubulin alpha-4A chain	Tuba4a	0.0417309	0.608141	-0.322236	0.799829	0.0632114	0.780227	-0.290895	0.817395	0.833388	0.976481	0.0313408	1.02196	0.500171	0.810643	0.172039	1.12665	0.290347	1	-0.150873	0.900706	0.253078	0.849256	-0.213331	0.862544	0.707849	0.989503	-0.062458	0.957631	0.0420196	0.706219	0.366927	1.2896	0.606261	1	0.13243	1.09614	34.3364	34.2576	34.4815	34.5651	34.9502	34.9549	34.643	34.4216	34.6923	34.9913	34.5697
P10126	Elongation factor 1-alpha 1	Eef1a1	0.627774	0.961019	-0.0233141	0.98397	0.143787	0.94208	0.0821318	1.05858	0.0920306	0.850007	0.105446	1.07583	0.474564	0.885375	0.074398	1.05292	0.836556	0.995597	0.014005	1.00975	0.0275268	0.856841	0.140149	1.10202	0.157644	0.94038	0.126144	1.09137	0.606843	0.977767	0.0474936	1.03347	0.28896	1	0.09924	1.07121	34.6649	34.723	34.7225	34.769	34.741	34.8023	34.6967	34.6337	34.8422	34.7768	34.6178
Q9D2P8	Myelin-associated oligodendrocyte basic protein	Mobp	0.184748	0.697801	0.397808	1.3175	0.202758	0.874335	-0.252135	0.839653	0.0513995	0.481401	-0.649943	0.637306	0.00323732	0.311714	-0.918304	0.529131	0.65652	1	0.138002	1.10038	0.265891	0.788538	-0.333033	0.793866	0.288605	0.878787	-0.471035	0.721447	0.14755	0.650634	-0.722479	0.606055	0.468256	1	-0.275209	0.82633	34.0412	34.167	34.1206	34.1861	33.251	33.3439	33.4463	34.2861	34.3273	34.1915	34.2399
P26443	Glutamate dehydrogenase 1, mitochondrial	Glud1	0.645016	0.957478	-0.0295113	0.979752	0.438473	0.94711	-0.0972954	0.934784	0.574723	0.939037	-0.0677841	0.954102	0.0425263	0.701997	0.163651	1.12012	0.350676	1	0.0553818	1.03913	0.370497	0.898904	-0.166692	0.890883	0.265059	0.901505	-0.222074	0.857332	0.0716944	0.777459	0.179906	1.13281	0.405184	1	-0.205818	0.867047	34.4326	34.5128	34.4495	34.4906	34.6327	34.585	34.3876	34.5267	34.3725	34.4197	34.4707
P05201	Aspartate aminotransferase, cytoplasmic	Got1	0.271113	0.939445	-0.0470114	0.967939	0.66542	0.992828	-0.0203978	0.985961	0.395524	0.966771	0.0266136	1.01862	0.352605	0.897395	0.0546646	1.03862	0.919646	0.997083	-0.00499852	0.996541	0.960691	0.996867	0.00291443	1.00202	0.866864	0.997295	0.00791295	1.0055	0.332255	0.982076	0.0355752	1.02497	0.861582	1	-0.0111764	0.992283	34.255	34.4247	34.3855	34.2882	34.3943	34.4191	34.3468	34.4166	34.3499	34.3082	34.3958
P62814	V-type proton ATPase subunit B, brain isoform	Atp6v1b2	0.960597	0.994961	0.0024477	1.0017	0.977652	0.998949	-0.00195293	0.998647	0.950204	0.993647	-0.00440063	0.996954	0.254799	0.939691	-0.031765	0.978223	0.48507	1	0.0472285	1.03328	0.51282	0.962535	0.0610708	1.04324	0.890911	0.999569	0.0138423	1.00964	0.231655	0.890525	0.101976	1.07324	0.246065	1	0.147583	1.10771	34.3597	34.3338	34.4386	34.3547	34.4409	34.42	34.4006	34.2264	34.3584	34.4794	34.445
Q8BH59	Calcium-binding mitochondrial carrier protein Aralar1	Slc25a12	0.488336	0.918456	0.076087	1.05415	0.743791	0.985477	-0.0471575	0.967841	0.246276	0.850228	-0.123244	0.918121	0.411165	0.891709	0.0662365	1.04698	0.500633	1	0.113581	1.08191	0.445963	0.907471	-0.135984	0.910049	0.0696354	0.876701	-0.249565	0.84115	0.954814	1	-0.00576655	0.996011	0.0526526	1	-0.321568	0.8002	34.0532	33.9472	34.267	34.423	34.1555	34.0306	33.9972	34.085	34.2142	34.0421	34.0116
Q9CZU6	Citrate synthase, mitochondrial	Cs	0.0519977	0.854813	0.0838268	1.05983	0.286814	0.969337	0.0503979	1.03555	0.368226	0.956536	-0.033429	0.977095	0.777247	0.964104	0.0269947	1.01889	0.100987	1	0.0874379	1.06248	0.750856	0.992244	0.0137266	1.00956	0.0522245	0.976628	-0.0737114	0.95019	0.145091	0.953179	0.0589193	1.04169	0.564252	1	-0.0417868	0.971451	34.4739	34.3315	34.4564	34.3945	34.3865	34.3447	34.3465	34.2846	34.289	34.2577	34.4195
Q9DBJ1	Phosphoglycerate mutase 1	Pgam1	0.223731	0.938102	-0.0437557	0.970126	0.932064	0.996819	-0.00734138	0.994924	0.641081	0.962492	0.0364143	1.02556	0.394315	0.854917	-0.0942421	0.936764	0.472964	1	-0.0363515	0.975118	0.257127	0.918599	0.0871671	1.06228	0.143702	0.941536	0.123519	1.08939	0.705358	0.989797	0.022543	1.01575	0.0856222	1	0.240304	1.18124	34.3909	34.3242	34.4199	34.4092	34.402	34.4847	34.389	34.3836	34.4897	34.4604	34.6147
P50396	Rab GDP dissociation inhibitor alpha	Gdi1	0.379832	0.953167	0.0353573	1.02481	0.324879	0.969901	0.0482563	1.03401	0.625764	0.986009	0.012899	1.00898	0.936603	0.991525	0.00564003	1.00392	0.15595	1	0.0746371	1.0531	0.112872	0.907752	0.0923754	1.06612	0.450242	1	0.0177383	1.01237	0.163339	0.987818	0.0246919	1.01726	0.534154	1	0.0367902	1.02583	34.3144	34.3887	34.5152	34.3922	34.3769	34.3872	34.3374	34.3679	34.3668	34.3139	34.439
Q8CAQ8	MICOS complex subunit Mic60	Immt	0.187716	0.836115	0.112436	1.08105	0.642104	0.971564	0.0623026	1.04413	0.666177	0.952515	-0.0501335	0.965847	0.751955	0.932424	0.0597687	1.0423	0.506809	1	0.081529	1.05814	0.77744	0.990521	-0.0418727	0.971393	0.379118	0.963186	-0.123402	0.918021	0.398926	0.930308	-0.0937608	0.937077	0.219382	1	-0.276931	0.825345	34.1929	34.0884	34.1784	34.3911	33.9892	34.0988	34.1984	34.0041	34.2108	33.8286	34.14
P19246	Neurofilament heavy polypeptide	Nefh	0.854461	0.95998	-0.0435791	0.970245	0.131309	0.63669	-0.616736	0.652145	0.118833	0.575807	-0.573157	0.672144	0.305113	0.639714	-0.413956	0.750563	0.313718	0.965335	-0.306461	0.808623	0.0869894	0.533667	-0.985752	0.504962	0.168298	0.790115	-0.679291	0.624472	0.111283	0.688551	-0.495354	0.709387	0.242448	1	-0.760689	0.590214	33.8005	33.6954	33.1049	33.8243	33.2014	33.5039	33.5533	34.011	33.9797	33.5042	34.029
P99024	Tubulin beta-5 chain	Tubb5	0.880113	0.976524	0.0223909	1.01564	0.273359	0.883653	-0.244571	0.844066	0.178143	0.7386	-0.266962	0.831068	0.461978	0.724923	-0.345583	0.78699	0.808117	1	0.0571632	1.04042	0.540855	0.911807	-0.157386	0.896649	0.392932	0.914216	-0.214549	0.861816	0.73048	0.966662	0.0771834	1.05496	0.595365	1	0.208218	1.15526	34.2406	34.4254	34.415	33.9282	34.3764	34.1761	33.9888	34.1259	34.4825	34.9913	34.2523
Q8VHR5	Transcriptional repressor p66-beta	Gatad2b	0.561196	0.835845	0.24053	1.18143	0.39714	0.972007	-0.0467749	0.968098	0.435864	0.814542	-0.287305	0.819432	0.307336	0.521281	-0.843342	0.557351	0.711347	1	-0.12505	0.916973	0.517793	0.980225	-0.0416629	0.971535	0.806801	0.993214	0.0833867	1.0595	0.219823	0.692903	-0.944832	0.51949	0.871157	1	-0.0181039	0.98753	34.1694	34.1856	34.2292	34.2418	32.7858	34.0124	33.871	34.9387	34.2221	34.1453	34.3396
P46096	Synaptotagmin-1	Syt1	0.607398	0.961377	0.0226784	1.01584	0.626632	0.979627	-0.0471848	0.967823	0.443432	0.924769	-0.0698631	0.952728	0.4277	0.839695	-0.120878	0.919628	0.63262	1	0.0341555	1.02396	0.9898	0.998564	-0.00169754	0.998824	0.805219	1	-0.0358531	0.975455	0.982363	1	0.00187556	1.0013	0.665506	1	0.0869007	1.06209	34.1336	34.1459	34.2298	34.1539	34.1387	34.1498	34.2586	34.0554	34.113	34.1428	34.3875
Q8VEM8	Phosphate carrier protein, mitochondrial	Slc25a3	0.833863	0.972599	-0.0214497	0.985242	0.493124	0.952677	-0.0836178	0.943688	0.461364	0.934401	-0.0621681	0.957824	0.0984372	0.719034	0.160742	1.11786	0.866607	1	0.0245984	1.0172	0.300823	0.893065	-0.186176	0.878932	0.0588712	0.895084	-0.210775	0.864073	0.0230718	0.777298	0.160749	1.11787	0.138703	1	-0.210768	0.864077	34.1907	33.9287	34.0428	34.3816	34.2169	34.2908	34.06	34.1276	34.0918	34.053	34.1332
P60879	Synaptosomal-associated protein 25	Snap25	0.93348	0.987822	0.0101131	1.00703	0.743471	0.980724	0.0566509	1.04005	0.757383	0.962348	0.0465378	1.03278	0.561572	0.873971	0.108324	1.07798	0.669513	1	-0.0486705	0.966827	0.863659	0.991661	-0.0433235	0.970417	0.98379	0.998375	0.00534693	1.00371	0.692277	0.965701	0.0714817	1.0508	0.922503	1	-0.0314954	0.978406	34.2637	33.9986	33.9329	33.8112	33.8801	34.1887	34.1309	33.9372	33.8206	33.8968	33.9553
P63038	60 kDa heat shock protein, mitochondrial	Hspd1	0.492037	0.952238	-0.0313858	0.97848	0.175785	0.983763	0.0305168	1.02138	0.174395	0.924475	0.0619026	1.04384	0.00608473	0.638565	0.177303	1.13077	0.312856	1	0.0312805	1.02192	0.48486	0.992541	0.0162493	1.01133	0.679411	1	-0.0150312	0.989635	0.0269148	0.809739	0.142087	1.1035	0.170944	1	-0.0502472	0.965771	34.2591	34.2906	34.2752	34.2815	34.4009	34.3856	34.3046	34.2237	34.2251	34.2276	34.2043
Q9D6R2	Isocitrate dehydrogenase [NAD] subunit alpha, mitochondrial	Idh3a	0.101407	0.836574	0.0981943	1.07043	0.423304	0.977417	0.0421419	1.02964	0.309215	0.93409	-0.0560524	0.961893	0.402092	0.84191	-0.109737	0.926757	0.2317	1	0.0922724	1.06605	0.279044	0.941116	0.07201	1.05118	0.774856	1	-0.0202624	0.986053	0.5191	0.963245	-0.0598952	0.959334	0.739118	1	0.0295798	1.02071	34.1899	34.2191	34.3422	34.2249	34.0456	34.1741	34.2723	34.1311	34.1059	34.1378	34.3014
P35486	Pyruvate dehydrogenase E1 component subunit alpha, somatic form, mitochondrial	Pdha1	0.407601	0.925431	0.0649616	1.04606	0.691082	0.979095	-0.0546719	0.962813	0.341828	0.876352	-0.119633	0.920421	0.50266	0.897986	-0.0611744	0.958484	0.244225	1	0.130175	1.09443	0.894463	0.994284	-0.0284309	0.980486	0.490822	0.96476	-0.158606	0.89589	0.618545	0.963973	0.0602264	1.04263	0.892697	1	-0.0372054	0.974541	34.2385	34.3978	34.4985	34.3126	34.3846	34.2815	34.2107	34.1783	34.4294	34.4493	34.3391
P35802	Neuronal membrane glycoprotein M6-a	Gpm6a	0.554791	0.936512	0.0592457	1.04192	0.0371372	0.874832	-0.174335	0.886176	0.0111465	0.656502	-0.233581	0.850521	0.138448	0.636282	-0.259207	0.835547	0.996902	0.999788	0.000525157	1.00036	0.0602254	0.787359	-0.215972	0.860966	0.127802	0.894664	-0.216497	0.860653	0.847585	0.987981	-0.0320791	0.97801	0.881119	1	0.0106309	1.0074	34.2614	33.9429	34.103	34.1878	33.9491	34.1415	34.271	33.9106	34.0504	34.2554	34.3536
P68369	Tubulin alpha-1A chain	Tuba1a	0.58951	0.893366	0.123848	1.08964	0.560446	0.947375	0.112236	1.0809	0.958985	0.990949	-0.0116119	0.991984	0.357404	0.721933	0.24766	1.18728	0.129408	0.930095	0.364802	1.2877	0.521337	0.909398	0.180342	1.13315	0.462888	0.947715	-0.18446	0.879979	0.0245995	0.745647	0.648207	1.56722	0.516086	1	0.216088	1.16158	34.7712	34.7627	34.9361	34.395	34.8853	35.0773	34.5272	34.1629	34.3091	34.9191	34.5482
P05063	Fructose-bisphosphate aldolase C	Aldoc	0.475204	0.952569	0.035961	1.02524	0.722165	0.987701	0.0335348	1.02352	0.976942	0.996015	-0.00242615	0.99832	0.300618	0.758992	0.163748	1.12019	0.451094	1	0.0595589	1.04215	0.536596	0.968336	-0.0536499	0.963496	0.230057	0.965022	-0.113209	0.924529	0.544706	0.975319	0.0473067	1.03333	0.143819	1	-0.22965	0.852842	34.1081	34.2226	34.1042	34.0537	34.0845	34.1447	34.075	34.1513	33.9754	33.8364	34.0653
O55042	Alpha-synuclein	Snca	0.808544	0.972749	-0.0196623	0.986464	0.452456	0.985598	0.0302904	1.02122	0.473433	0.951499	0.0499527	1.03523	0.840077	0.972468	0.0235634	1.01647	0.841158	1	-0.0240644	0.983458	0.44317	0.975069	0.0434812	1.0306	0.548006	0.978155	0.0675456	1.04793	0.96144	1	0.00783539	1.00545	0.245526	1	0.0518176	1.03657	34.2579	34.1379	34.3033	34.2419	34.1642	34.355	34.4281	34.0759	34.2513	34.2745	34.1976
Q8C8R3	Ankyrin-2	Ank2	0.995373	0.999579	0.000137329	1.0001	0.149278	0.963642	-0.0590851	0.959873	0.135986	0.92592	-0.0592224	0.959781	0.494668	0.896428	-0.0643063	0.956405	0.574037	1	0.0167363	1.01167	0.365359	0.977263	-0.0390968	0.973264	0.286128	0.976259	-0.0558332	0.962039	0.711385	0.990056	0.0168037	1.01172	0.746294	1	0.0252768	1.01767	34.014	34.0385	34.0692	34.053	34.0862	34.0211	34.0754	33.9876	34.0474	34.0474	34.1884
P11499	Heat shock protein HSP 90-beta	Hsp90ab1	0.944447	0.992882	-0.00359707	0.99751	0.0921104	0.902872	0.112582	1.08116	0.112095	0.84345	0.116179	1.08386	0.0495692	0.794734	0.100798	1.07237	0.602484	1	0.0345319	1.02422	0.0814349	0.845447	0.160965	1.11803	0.224811	0.955291	0.126433	1.09159	0.243393	0.887985	0.110704	1.07976	0.211395	1	0.13634	1.09911	34.2941	34.3062	34.2646	34.2376	34.3234	34.3678	34.2835	34.3015	34.1198	34.2377	34.2519
P30275	Creatine kinase U-type, mitochondrial	Ckmt1	0.664101	0.951279	0.0341841	1.02398	0.9534	0.995962	0.00337124	1.00234	0.651158	0.967084	-0.0308128	0.978869	0.155964	0.74016	0.148739	1.1086	0.227304	1	0.10987	1.07913	0.598415	0.981104	-0.0406443	0.972221	0.0446994	0.901094	-0.150514	0.900929	0.0433758	0.731134	0.204117	1.15198	0.198535	1	-0.0951354	0.936184	34.0986	33.9465	34.1293	34.1485	34.2036	34.1344	33.9382	34.048	33.9085	33.9631	34.0774
Q62108	Disks large homolog 4	Dlg4	0.0432711	0.596211	0.381427	1.30263	0.491597	0.91762	0.187079	1.13846	0.463487	0.841216	-0.194347	0.873968	0.157151	0.391162	-0.648113	0.638114	0.157319	0.969355	0.181259	1.13387	0.471363	0.897121	0.289422	1.22215	0.775881	0.982415	0.108163	1.07786	0.0880502	0.67952	-0.415382	0.749821	0.528528	1	0.340894	1.26654	34.3726	34.1799	34.419	34.1106	33.8482	33.4315	33.9716	34.0621	34.132	34.0825	34.4935
Q02053	Ubiquitin-like modifier-activating enzyme 1	Uba1	0.531631	0.963966	-0.0209511	0.985583	0.503255	0.990105	-0.0249428	0.98286	0.913722	0.994231	-0.0039917	0.997237	0.983408	0.996227	-0.00152779	0.998942	0.779311	0.997942	0.0107384	1.00747	0.907218	0.995033	0.00510406	1.00354	0.900399	0.997332	-0.00563431	0.996102	0.328356	0.958527	0.0532074	1.03757	0.452125	1	0.0491009	1.03462	34.0254	34.0507	34.115	34.0354	34.1506	34.0684	34.1088	34.032	34.0281	34.1615	34.0605
Q9DB20	ATP synthase subunit O, mitochondrial	Atp5po	0.685031	0.963129	0.0212442	1.01483	0.772074	0.992951	-0.0193716	0.986662	0.448433	0.951977	-0.0406158	0.97224	0.272555	0.874497	0.0749397	1.05332	0.110249	1	0.0907389	1.06492	0.690627	0.991773	-0.026914	0.981518	0.132094	0.944926	-0.117653	0.921686	0.202295	0.93267	0.0723445	1.05142	0.214959	1	-0.120248	0.920029	33.7498	33.8802	33.8799	33.9758	33.9203	33.8669	33.8358	33.7621	33.8658	33.7764	33.8609
Q9R0P9	Ubiquitin carboxyl-terminal hydrolase isozyme L1	Uchl1	0.726849	0.959037	-0.0281094	0.980705	0.425736	0.970739	-0.0567326	0.961439	0.627493	0.969132	-0.0286232	0.980355	0.887322	0.981921	0.0175343	1.01223	0.83717	1	0.0226351	1.01581	0.708626	0.989014	-0.0367597	0.974842	0.311145	0.976232	-0.0593948	0.959667	0.193778	0.856171	0.132318	1.09605	0.479729	1	0.0553888	1.03914	33.9876	33.798	34.0608	34.0779	34.0256	34.1516	33.8723	33.9527	34.0437	33.9817	34.1604
Q9QYX7	Protein piccolo	Pclo	0.256536	0.791483	0.214537	1.16033	0.906555	0.993789	0.017255	1.01203	0.333048	0.818009	-0.197282	0.872192	0.210713	0.471675	-0.549561	0.683228	0.861892	0.999015	-0.0225741	0.984475	0.932877	0.992322	0.0149956	1.01045	0.860482	1	0.0375697	1.02638	0.0879222	0.656806	-0.500338	0.706941	0.775805	1	0.0867926	1.06201	34.0512	33.9744	33.8775	33.8579	33.6036	33.2474	34.0589	33.6942	34.0244	33.7307	34.2194
Q7TQD2	Tubulin polymerization-promoting protein	Tppp	0.123081	0.777753	-0.181056	0.882057	0.277051	0.900985	-0.144901	0.904442	0.719297	0.964624	0.0361557	1.02538	0.443271	0.766993	0.204666	1.15242	0.141112	0.958499	-0.190025	0.87659	0.0589595	0.720129	-0.26621	0.831501	0.436637	0.980881	-0.0761846	0.948563	0.159455	0.824333	0.163347	1.11988	0.553413	1	-0.117504	0.921781	33.9634	33.5655	33.6051	33.8278	34.0585	33.9805	33.7357	33.9544	33.8784	34.0272	33.6024
P70296	Phosphatidylethanolamine-binding protein 1	Pebp1	0.860719	0.987272	-0.00735321	0.994916	0.332288	0.920697	0.128897	1.09346	0.241701	0.843545	0.13625	1.09904	0.217402	0.973584	0.0152435	1.01062	0.68477	0.994397	0.0246824	1.01726	0.22406	0.830694	0.241604	1.18231	0.264068	0.899564	0.216921	1.16225	0.603076	0.989048	0.028492	1.01995	0.353479	1	0.23017	1.17297	33.8703	34.0364	33.9034	33.9188	33.9482	33.9652	34.003	33.8999	33.8817	33.9427	33.9402
O88569	Heterogeneous nuclear ribonucleoproteins A2/B1	Hnrnpa2b1	0.27377	0.835595	0.128959	1.0935	0.338379	0.951905	0.0768232	1.05469	0.634262	0.949946	-0.0521355	0.964508	0.0451512	0.428325	-0.322323	0.799781	0.903575	0.996038	-0.0137469	0.990517	0.248857	0.90848	0.114243	1.08241	0.332304	0.964975	0.127989	1.09277	0.1103	0.687698	-0.288649	0.818669	0.182665	1	0.161664	1.11858	34.3168	34.2265	34.2839	34.113	33.9896	33.8761	34.034	34.3048	34.3258	34.2977	34.2127
Q60930	Voltage-dependent anion-selective channel protein 2	Vdac2	0.952615	0.987019	0.0089756	1.00624	0.604201	0.964367	0.0906948	1.06488	0.595971	0.931976	0.0817192	1.05828	0.327951	0.709784	0.284992	1.2184	0.54613	1	0.112934	1.08143	0.81869	0.987703	0.059138	1.04184	0.790277	0.999099	-0.0537961	0.963398	0.0595561	0.681667	0.322027	1.25009	0.955111	1	-0.0167618	0.988449	33.9425	33.5789	33.8152	34.1353	33.947	34.1575	33.7135	33.6384	33.8386	33.5717	33.9628
P10922	Histone H1.0	H1-0	0.0377072	0.598306	0.32183	1.24992	0.214832	0.892809	-0.18129	0.881914	0.00973353	0.435633	-0.50312	0.705579	0.111442	0.476348	-0.361578	0.778313	0.212876	0.952327	0.287069	1.22016	0.132899	0.741831	-0.310413	0.806411	0.0684168	0.694348	-0.597482	0.660906	0.966875	1	0.0108376	1.00754	0.383487	1	-0.225067	0.855556	33.5069	33.3153	33.2732	33.463	33.1081	33.0404	32.6956	33.2849	33.2098	33.5634	33.3082
P10649	Glutathione S-transferase Mu 1	Gstm1	0.627996	0.9563	0.0297678	1.02085	0.172127	0.912976	0.115083	1.08304	0.312831	0.909219	0.0853149	1.06092	0.728276	0.936081	0.0502682	1.03546	0.66204	0.997423	0.028717	1.0201	0.307544	0.901936	0.137396	1.09992	0.421171	0.973289	0.108679	1.07824	0.946676	1	0.00811704	1.00564	0.676435	1	0.0665283	1.04719	33.9941	33.9019	34.0154	34.0135	33.8316	34.0811	34.0091	33.9821	33.8534	33.923	33.8891
O54983	Ketimine reductase mu-crystallin	Crym	0.360258	0.825211	0.164102	1.12047	0.151235	0.901308	0.136296	1.09908	0.866821	0.978122	-0.0278061	0.980911	0.894724	0.983861	0.0169067	1.01179	0.292719	0.97002	0.290042	1.22268	0.0432736	0.748083	0.232427	1.17481	0.82502	0.997734	-0.0576146	0.960851	0.441505	0.834563	0.269336	1.20525	0.194814	1	0.194815	1.14458	33.9561	34.0097	34.1157	33.9614	34.0374	33.979	34.0144	33.2709	33.9314	33.8822	34.1004
Q9CZ13	Cytochrome b-c1 complex subunit 1, mitochondrial	Uqcrc1	0.448344	0.957476	-0.0247345	0.983001	0.913497	0.99502	0.00330353	1.00229	0.385144	0.964184	0.028038	1.01962	0.446484	0.909946	0.051878	1.03661	0.867768	0.997887	-0.00712331	0.995075	0.907301	0.994639	0.00502141	1.00349	0.795661	1	0.0121447	1.00845	0.670571	0.990574	0.0238959	1.0167	0.763607	1	-0.0158374	0.989082	33.9547	34.0337	33.9449	33.9822	34.0605	33.9754	34.0529	33.9488	33.9805	33.931	34.0012
Q8VDN2	Sodium/potassium-transporting ATPase subunit alpha-1	Atp1a1	0.798559	0.980508	0.0139915	1.00975	0.105718	0.903174	-0.11668	0.922308	0.084436	0.826134	-0.130672	0.913406	0.22485	0.72171	-0.19129	0.875822	0.979977	1	0.00192897	1.00134	0.29427	0.919574	-0.0883306	0.940611	0.402116	0.975376	-0.0902596	0.939354	0.436297	0.946234	-0.078441	0.947081	0.863511	1	0.0225894	1.01578	33.8875	33.9634	33.9214	34.0094	33.8756	33.8931	33.8284	34.0429	34.0172	34.1856	33.9658
Q9Z1G4	V-type proton ATPase 116 kDa subunit a isoform 1	Atp6v0a1	0.72626	0.941558	0.0659533	1.04678	0.745585	0.974587	0.0746775	1.05313	0.969794	0.992398	0.00872421	1.00607	0.401557	0.720737	-0.324345	0.798661	0.780212	1	-0.0679487	0.953993	0.625034	0.919177	0.162821	1.11947	0.508882	0.948279	0.23077	1.17346	0.244397	0.723834	-0.356903	0.780839	0.654653	1	0.198212	1.14728	34.1887	34.4235	34.3195	33.9295	33.7859	34.0845	34.6305	34.1647	34.0812	33.9913	34.5279
Q61644	Protein kinase C and casein kinase substrate in neurons protein 1	Pacsin1	0.901151	0.988003	0.00681877	1.00474	0.640591	0.979442	-0.0440434	0.969933	0.554023	0.950768	-0.0508621	0.965359	0.921064	0.99127	-0.0052948	0.996337	0.404458	1	0.0379715	1.02667	0.76594	0.990834	-0.0432688	0.970454	0.566436	0.977539	-0.0812403	0.945245	0.00909638	0.791262	0.142117	1.10352	0.723247	1	0.066171	1.04693	33.9357	33.7546	33.8605	33.8836	33.9642	33.9099	33.8046	33.7764	33.8039	33.9037	33.9811
Q9Z0E0	Neurochondrin	Ncdn	0.495198	0.91942	-0.078623	0.946961	0.230183	0.945336	0.0846933	1.06046	0.120893	0.795411	0.163316	1.11986	0.32421	0.908101	-0.0503826	0.96568	0.228271	0.99789	-0.168987	0.889467	0.214134	0.896568	0.136795	1.09946	0.0509778	0.838838	0.305782	1.23609	0.111763	0.697752	-0.278551	0.824419	0.381798	1	0.0776138	1.05527	33.8286	33.9757	33.994	33.7687	33.7675	33.8389	34.2689	34.0103	33.9661	33.8383	33.8689
P13595	Neural cell adhesion molecule 1	Ncam1	0.523265	0.951729	0.0348366	1.02444	0.366833	0.976892	0.0418472	1.02943	0.904854	0.99017	0.00701065	1.00487	0.397716	0.882949	0.0767937	1.05467	0.173516	1	0.0749944	1.05336	0.594682	0.985283	0.035483	1.0249	0.620382	0.996694	-0.0395114	0.972984	0.150487	0.847973	0.13315	1.09669	0.854638	1	0.0168451	1.01174	34.0118	33.9317	33.9684	33.9781	34.073	33.9621	33.7987	33.9346	33.9199	33.8949	33.9866
O55131	Septin-7	Septin7	0.475553	0.933558	-0.0609261	0.958649	0.128945	0.891154	-0.151736	0.900166	0.145631	0.885184	-0.0908104	0.938995	0.58487	0.95654	0.0286007	1.02002	0.71994	1	-0.0444323	0.969671	0.170462	0.83228	-0.21485	0.861636	0.0917536	0.899653	-0.170418	0.888585	0.127311	0.883045	0.104517	1.07513	0.381305	1	-0.0945015	0.936596	33.8078	33.4889	33.7953	33.8354	33.876	33.835	33.6852	33.8125	33.7552	33.8662	33.7876
P17426	AP-2 complex subunit alpha-1	Ap2a1	0.836905	0.986664	-0.00688915	0.995236	0.474235	0.980334	-0.037808	0.974134	0.509739	0.964251	-0.0309189	0.978797	0.867105	0.983978	-0.0149822	0.989669	0.963272	1	0.00244776	1.0017	0.586587	0.980529	-0.0390956	0.973265	0.570644	0.994792	-0.0415433	0.971615	0.871163	1	0.0086422	1.00601	0.859339	1	-0.0179189	0.987656	33.7555	33.8412	33.7729	33.723	33.7666	33.8039	33.8297	33.7931	33.707	33.7234	33.877
Q9QWI6	SRC kinase signaling inhibitor 1	Srcin1	0.0431906	0.701219	0.245946	1.18587	0.463205	0.953043	-0.0808563	0.945496	0.0242825	0.598063	-0.326802	0.797302	0.0633644	0.395405	-0.413605	0.750745	0.296556	1	0.120908	1.08742	0.35757	0.900915	-0.148026	0.902485	0.155842	0.889369	-0.268934	0.829933	0.0811535	0.680617	-0.275827	0.825977	0.532999	1	-0.131156	0.9131	33.7133	33.7672	33.6219	33.5744	33.264	33.2515	33.4427	33.4599	33.6982	33.5622	33.7806
Q91VD9	NADH-ubiquinone oxidoreductase 75 kDa subunit, mitochondrial	Ndufs1	0.287957	0.938779	-0.0450922	0.969228	0.41609	0.971452	-0.0485521	0.966906	0.948831	0.992858	-0.00345993	0.997605	0.0420436	0.814591	0.090786	1.06495	0.029261	0.999405	0.0259616	1.01816	0.634767	0.981579	-0.040329	0.972433	0.444641	0.976733	-0.0662905	0.955091	0.00119203	0.844149	0.109638	1.07896	0.672498	1	-0.0474383	0.967653	33.7799	33.8853	33.9028	33.8779	33.9611	33.9836	33.8577	33.8654	33.8652	33.8972	33.866
P63011	Ras-related protein Rab-3A	Rab3a	0.579657	0.952252	0.0373955	1.02626	0.600049	0.969653	0.0807503	1.05757	0.758456	0.963496	0.0433548	1.03051	0.293658	0.828585	-0.107693	0.928071	0.715573	0.997304	0.0355492	1.02495	0.389971	0.894242	0.179602	1.13257	0.513132	0.971137	0.144053	1.10501	0.655157	0.973297	0.0557772	1.03942	0.290844	1	0.307523	1.23758	33.9595	33.791	33.9076	33.8899	33.8371	33.9291	33.9664	33.6783	33.8372	33.9299	34.0516
Q9DB77	Cytochrome b-c1 complex subunit 2, mitochondrial	Uqcrc2	0.241046	0.912896	0.0664837	1.04716	0.0376217	0.920131	0.0945232	1.06771	0.606278	0.969	0.0280396	1.01963	0.842295	0.97907	0.0164051	1.01144	0.508224	1	0.0600675	1.04251	0.0841035	0.911206	0.0958633	1.0687	0.695456	0.999106	0.0357958	1.02512	0.829327	0.989782	-0.0238209	0.983624	0.9526	0.999133	-0.00443014	0.996934	33.9657	33.9412	34.0289	33.9643	33.8932	33.8953	34.069	33.8799	33.8052	33.8052	33.9505
Q99104	Unconventional myosin-Va	Myo5a	0.568649	0.941421	0.0493776	1.03482	0.0198109	0.731259	-0.275558	0.826131	0.0134563	0.582267	-0.324935	0.798334	0.025201	0.377805	-0.365959	0.775953	0.18497	1	-0.070329	0.952421	0.0294765	0.554246	-0.367915	0.774902	0.0436	0.842	-0.297586	0.813613	0.00206934	0.7008	-0.275181	0.826347	0.226819	1	-0.206807	0.866452	33.6664	33.68	33.5413	33.6623	33.3879	33.4581	33.7005	33.6869	33.7072	33.7412	33.8367
Q62420	Endophilin-A1	Sh3gl2	0.402728	0.931476	0.059866	1.04237	0.610279	0.987947	-0.0294636	0.979785	0.230326	0.890827	-0.0893295	0.939959	0.418882	0.815488	-0.139713	0.9077	0.599908	1	0.052433	1.03701	0.957142	0.997512	-0.00330734	0.99771	0.569791	0.982579	-0.0557404	0.962101	0.97516	1	-0.00431697	0.997012	0.435223	1	0.079656	1.05677	33.8855	33.823	33.9488	33.8162	33.7087	33.9031	33.9564	33.6748	33.7994	33.8472	34.0441
Q8CI94	Glycogen phosphorylase, brain form	Pygb	0.364241	0.950655	0.0314354	1.02203	0.0484017	0.893892	0.132156	1.09593	0.0643602	0.852921	0.10072	1.07231	0.149111	0.892972	0.0541573	1.03825	0.516455	1	0.0363096	1.02549	0.102234	0.841365	0.168072	1.12356	0.153936	0.928704	0.131762	1.09563	0.833217	1	0.00958188	1.00666	0.400315	1	0.0871868	1.0623	33.8902	33.9528	33.8161	33.9142	33.8511	33.8842	33.8627	33.9091	33.8024	33.7966	33.8304
P97427	Dihydropyrimidinase-related protein 1	Crmp1	0.386986	0.956499	0.0254488	1.0178	0.294071	0.969137	0.0485399	1.03422	0.552254	0.975281	0.0230911	1.01613	0.713629	0.981926	0.0130768	1.00911	0.161627	1	0.0570602	1.04034	0.208988	0.914471	0.0868276	1.06203	0.611089	0.999891	0.0297674	1.02085	0.158733	0.959906	0.04975	1.03509	0.403504	1	0.0664406	1.04713	33.7647	33.773	33.8657	33.7958	33.7872	33.8212	33.7857	33.7227	33.7549	33.817	33.7653
Q9DBG3	AP-2 complex subunit beta	Ap2b1	0.182821	0.945655	0.0371689	1.0261	0.880638	0.99539	-0.00933228	0.993552	0.398815	0.948871	-0.0465012	0.968282	0.116537	0.737717	-0.143024	0.905619	0.440993	1	0.0314509	1.02204	0.517779	0.969999	0.0492986	1.03476	0.802391	1	0.0178477	1.01245	0.408942	0.986061	-0.0286573	0.980332	0.238771	1	0.132215	1.09597	33.7637	33.811	33.8211	33.7279	33.7392	33.7139	33.7974	33.7233	33.7449	33.8175	33.9217
Q7TSJ2	Microtubule-associated protein 6	Map6	0.862263	0.980008	0.0162514	1.01133	0.210061	0.897653	-0.160957	0.894431	0.205852	0.803566	-0.177209	0.884412	0.537272	0.908198	-0.058382	0.960341	0.88921	1	-0.020031	0.986212	0.138377	0.769025	-0.276457	0.825616	0.27212	0.893301	-0.256426	0.837159	0.811435	0.985926	-0.0476379	0.967519	0.294954	1	-0.245682	0.843417	33.8023	33.7364	33.7316	33.7323	33.7807	33.6309	33.5234	33.9908	33.7461	33.7387	33.7896
P50518	V-type proton ATPase subunit E 1	Atp6v1e1	0.255255	0.903434	-0.0722858	0.95113	0.96029	0.995695	0.00582237	1.00404	0.492736	0.926818	0.0781082	1.05563	0.810569	0.972903	0.0223541	1.01562	0.553627	1	-0.0548248	0.962711	0.731244	0.976447	0.0604528	1.04279	0.5533	0.975285	0.115278	1.08318	0.620463	0.966184	0.0589765	1.04173	0.526791	1	0.1519	1.11103	33.6929	33.6533	33.6184	33.7335	33.8325	33.7319	33.7498	33.5772	33.8427	33.6952	33.8245
Q9D051	Pyruvate dehydrogenase E1 component subunit beta, mitochondrial	Pdhb	0.334055	0.876472	-0.0923092	0.93802	0.6253	0.973397	-0.0786907	0.946917	0.931737	0.992352	0.0136185	1.00948	0.490838	0.845655	0.121313	1.08772	0.493124	1	0.0314344	1.02203	0.915484	0.99323	-0.0267436	0.981634	0.817472	0.998768	-0.0581779	0.960476	0.0497725	0.68098	0.271147	1.20677	0.788075	1	0.0916557	1.06559	33.9174	33.9578	34.0412	33.9367	34.3224	34.1141	33.9226	34.0009	33.9179	34.1978	33.9961
P16125	L-lactate dehydrogenase B chain	Ldhb	0.559858	0.948057	-0.04254	0.970944	0.0520465	0.894954	-0.146667	0.903335	0.233086	0.877316	-0.104127	0.930368	0.260008	0.913965	-0.0439873	0.96997	0.694086	1	-0.0471535	0.967844	0.0994614	0.827601	-0.191373	0.875772	0.361007	0.951358	-0.14422	0.904869	0.980586	1	0.00373777	1.00259	0.460538	1	-0.0964947	0.935303	33.611	33.6068	33.545	33.6081	33.6303	33.6447	33.549	33.8511	33.5012	33.6542	33.7088
P61264	Syntaxin-1B	Stx1b	0.456979	0.945039	0.0415638	1.02923	0.354871	0.950017	-0.0806019	0.945663	0.128819	0.841509	-0.122166	0.918807	0.873571	0.973936	-0.0223999	0.984593	0.755131	0.99614	0.0254822	1.01782	0.105683	0.854562	-0.163194	0.893046	0.0586125	0.89643	-0.188676	0.87741	0.813025	0.990713	-0.0200609	0.986191	0.175979	1	-0.186337	0.878834	33.6093	33.5276	33.6931	33.5104	33.4716	33.5915	33.5065	33.65	33.4982	33.445	33.6628
Q9CQQ7	ATP synthase F(0) complex subunit B1, mitochondrial	Atp5pb	0.417789	0.937868	0.0529516	1.03739	0.245746	0.943626	-0.0777925	0.947506	0.0408083	0.812394	-0.130744	0.91336	0.633461	0.930023	-0.0486107	0.966867	0.531894	1	0.0550499	1.0389	0.207358	0.899977	-0.13045	0.913546	0.0571741	0.888367	-0.1855	0.879344	0.658826	0.983052	0.0421028	1.02961	0.271799	1	-0.0947863	0.936411	33.6736	33.4952	33.6196	33.7289	33.6888	33.5145	33.5413	33.4942	33.6431	33.6552	33.6453
P28663	Beta-soluble NSF attachment protein	Napb	0.137993	0.838763	0.107727	1.07753	0.225988	0.900681	0.138754	1.10095	0.764008	0.972987	0.0310272	1.02174	0.475724	0.93257	-0.0397015	0.972856	0.217356	1	0.138987	1.10113	0.206263	0.828998	0.217167	1.16245	0.640305	0.979398	0.0781797	1.05569	0.529293	0.95286	0.0749931	1.05336	0.346441	1	0.192874	1.14304	33.7296	33.7825	33.7943	33.6272	33.6291	33.7123	33.7389	33.4693	33.5789	33.6918	33.729
Q8VEK3	Heterogeneous nuclear ribonucleoprotein U	Hnrnpu	0.514227	0.920241	0.079184	1.05642	0.477069	0.979701	0.0414871	1.02917	0.730998	0.962034	-0.0376968	0.974209	0.42302	0.757129	-0.225592	0.855244	0.443186	1	-0.0493533	0.966369	0.590608	0.981495	0.0382131	1.02684	0.196551	0.971915	0.0875664	1.06258	0.160474	0.714084	-0.292208	0.816651	0.838275	1	0.0209497	1.01463	33.7857	33.7829	33.7895	33.6447	33.6991	33.2932	33.7565	33.856	33.7526	33.8208	33.6228
Q91VA7	Isocitrate dehydrogenase [NAD] subunit, mitochondrial	Idh3b	0.390263	0.946661	0.0391661	1.02752	0.826936	0.992834	-0.0346552	0.976265	0.604113	0.937111	-0.0738213	0.950118	0.311667	0.973504	0.01721	1.012	0.388976	1	0.0625928	1.04434	0.778011	0.977057	-0.0719159	0.951374	0.609174	0.97533	-0.134509	0.91098	0.75502	0.989184	0.0250015	1.01748	0.70575	1	-0.126717	0.915913	33.7557	33.8192	33.86	33.7492	33.7591	33.7846	33.7648	33.6418	33.8339	33.7561	33.7531
Q60597	2-oxoglutarate dehydrogenase, mitochondrial	Ogdh	0.290131	0.953059	-0.034449	0.976405	0.11942	0.8969	-0.160828	0.894511	0.168485	0.842781	-0.126379	0.916128	0.25124	0.8738	-0.0748463	0.949443	0.267224	1	-0.0556246	0.962178	0.179597	0.830426	-0.216359	0.860735	0.312652	0.931702	-0.160735	0.894569	0.588468	0.985832	-0.0339642	0.976733	0.54105	1	-0.119853	0.920282	33.5724	33.5255	33.5395	33.561	33.5841	33.5433	33.5948	33.6717	33.5265	33.6807	33.5963
P06151	L-lactate dehydrogenase A chain	Ldha	0.0737994	0.906215	0.0628559	1.04453	0.379559	0.945187	0.0860149	1.06143	0.788338	0.978182	0.023159	1.01618	0.282153	0.814995	-0.115393	0.923131	0.18374	1	0.0536957	1.03792	0.186326	0.873132	0.169223	1.12445	0.342616	0.965498	0.115527	1.08337	0.835294	1	-0.012488	0.991381	0.217197	1	0.218431	1.16347	33.7742	33.7182	33.7891	33.7653	33.633	33.7498	33.6533	33.7172	33.741	33.7533	33.8602
Q8BYI9	Tenascin-R	Tnr	0.376294	0.951695	0.028927	1.02025	0.391566	0.970359	0.0556696	1.03934	0.647982	0.972838	0.0267426	1.01871	0.42713	0.913409	-0.0492764	0.966421	0.203592	1	0.0529938	1.03742	0.102047	0.900346	0.130416	1.09461	0.27651	0.976161	0.0774218	1.05513	0.448424	0.977663	0.0413246	1.02906	0.106846	1	0.168023	1.12352	33.5621	33.6019	33.6297	33.545	33.6282	33.5329	33.551	33.5744	33.4923	33.6152	33.6444
Q2PFD7	PH and SEC7 domain-containing protein 3	Psd3	0.0232659	0.752638	0.195384	1.14503	0.503552	0.936013	0.134049	1.09737	0.735502	0.953095	-0.0613358	0.958376	0.750282	0.904493	-0.103706	0.930639	0.115058	0.982311	0.16164	1.11856	0.654613	0.939496	0.128551	1.0932	0.909555	1	-0.0330887	0.977326	0.681968	0.975447	-0.0572929	0.961066	0.975011	1	0.0133247	1.00928	33.3689	33.258	33.3374	33.3815	33.2225	32.9909	33.1288	33.0608	33.3024	32.9507	33.4701
Q9DCX2	ATP synthase subunit d, mitochondrial	Atp5pd	0.71807	0.963185	0.0224894	1.01571	0.560246	0.984055	0.0358347	1.02515	0.813831	0.98689	0.0133453	1.00929	0.481547	0.879203	0.0862579	1.06161	0.622961	1	0.04076	1.02866	0.946836	0.995314	0.00549698	1.00382	0.639931	0.9983	-0.0352631	0.975854	0.339814	0.930624	0.0882003	1.06304	0.728983	1	-0.0333207	0.977168	33.7021	33.5311	33.635	33.7361	33.6198	33.7432	33.5125	33.5867	33.6808	33.5158	33.6747
P40142	Transketolase	Tkt	0.0852078	0.839207	-0.102839	0.931199	0.635727	0.981509	-0.0415865	0.971586	0.429229	0.936061	0.0612526	1.04337	0.309328	0.795582	0.137297	1.09984	0.385869	1	-0.0752309	0.94919	0.604321	0.963278	-0.0646744	0.956161	0.929999	0.99704	0.0105565	1.00734	0.622084	0.982801	0.0386562	1.02716	0.594413	1	-0.0880839	0.940771	33.4985	33.4363	33.5791	33.6257	33.6333	33.6885	33.5216	33.6972	33.6481	33.6215	33.4258
O55143	Sarcoplasmic/endoplasmic reticulum calcium ATPase 2	Atp2a2	0.618375	0.963107	-0.0217251	0.985054	0.32549	0.899765	-0.156388	0.897269	0.322302	0.850744	-0.134663	0.910883	0.359334	0.898409	-0.0566311	0.961507	0.617023	0.998935	-0.0324516	0.977757	0.394558	0.896206	-0.219135	0.85908	0.455561	0.955075	-0.186684	0.878623	0.600617	0.99087	0.0231737	1.01619	0.738214	1	-0.106879	0.928595	33.5839	33.4399	33.6058	33.466	33.5555	33.5635	33.5803	33.4773	33.5514	33.6639	33.5683
P51881	ADP/ATP translocase 2	Slc25a5	0.129682	0.783839	-0.178161	0.883829	0.130785	0.880973	-0.199699	0.870732	0.875158	0.983193	-0.0215378	0.985182	0.160646	0.639664	0.288635	1.22148	0.790448	1	-0.0199216	0.986286	0.161109	0.791265	-0.248241	0.841922	0.216687	0.897391	-0.22832	0.853628	0.0291089	0.6888	0.328069	1.25533	0.430651	1	-0.188886	0.877283	33.2872	33.404	33.3433	33.4384	33.7375	33.749	33.3266	33.3785	33.5404	33.5867	33.3225
D3Z2H9	Tropomyosin 3, related sequence 7	Tpm3-rs7	0.678146	0.971199	-0.0174784	0.987958	0.241921	0.964622	0.0618422	1.0438	0.0505955	0.890555	0.0793205	1.05652	0.889393	0.988673	0.00683212	1.00475	0.821474	0.99883	-0.0143382	0.990111	0.121062	0.904481	0.113308	1.08171	0.00747463	0.923179	0.127646	1.09251	0.914109	1	-0.00492477	0.996592	0.00902871	1	0.115889	1.08364	33.604	33.5583	33.7353	33.5797	33.5905	33.6772	33.6164	33.6803	33.6196	33.6281	33.6259
P10637	Microtubule-associated protein tau	Mapt	0.424689	0.916161	-0.0748465	0.949443	0.0260665	0.855195	-0.192472	0.875105	0.0898032	0.838502	-0.117625	0.921703	0.99287	0.99763	-0.000627518	0.999565	0.797971	0.994861	-0.0264778	0.981814	0.0937362	0.79406	-0.222102	0.857316	0.0279183	0.889249	-0.195624	0.873195	0.0553533	0.749986	0.19669	1.14607	0.979245	1	0.00169373	1.00117	33.4711	33.1749	33.3989	33.4758	33.6348	33.5112	33.3706	33.3189	33.4395	33.5811	33.5663
P84075	Neuron-specific calcium-binding protein hippocalcin	Hpca	0.624052	0.940163	-0.0632927	0.957077	0.2504	0.889388	0.188316	1.13943	0.168646	0.749009	0.251608	1.19053	0.437403	0.845435	-0.108826	0.927343	0.492271	1	-0.123297	0.918087	0.0821964	0.626993	0.3686	1.2911	0.0887323	0.738151	0.491898	1.40629	0.409708	0.850338	-0.206571	0.866595	0.146223	1	0.394152	1.31417	33.4499	33.4789	33.626	33.5161	33.3574	33.5567	33.896	33.364	33.731	33.5124	33.6194
Q60771	Claudin-11	Cldn11	0.991708	0.996887	0.00236645	1.00164	0.468908	0.903577	-0.209715	0.864708	0.472985	0.844005	-0.212082	0.863291	0.312711	0.702061	-0.297462	0.813682	0.613364	1	-0.161531	0.894076	0.486534	0.895976	-0.316692	0.802909	0.747897	0.977584	-0.155162	0.898032	0.314875	0.747634	-0.398594	0.758597	0.647476	1	-0.256293	0.837236	33.4373	33.2927	33.2167	33.7489	33.3188	33.0459	33.0942	33.7933	33.8553	33.6553	33.3043
P08752	Guanine nucleotide-binding protein G(i) subunit alpha-2	Gnai2	0.121472	0.850044	-0.0908934	0.938941	0.292814	0.900476	-0.171129	0.888148	0.579743	0.932212	-0.0802353	0.945903	0.16284	0.786748	0.118881	1.08589	0.683095	0.995081	-0.0224597	0.984553	0.352482	0.877353	-0.235439	0.849426	0.403911	0.922651	-0.21298	0.862754	0.106926	0.831861	0.141555	1.10309	0.560004	1	-0.190306	0.87642	33.3793	33.4168	33.4026	33.4603	33.5916	33.5896	33.3528	33.4982	33.496	33.5266	33.4168
Q01853	Transitional endoplasmic reticulum ATPase	Vcp	0.824084	0.987232	-0.00591106	0.995911	0.219332	0.97271	0.0420603	1.02958	0.185162	0.942696	0.0479713	1.03381	0.557508	0.960036	0.0265503	1.01857	0.854374	0.999369	0.00765991	1.00532	0.11884	0.929671	0.069912	1.04965	0.258662	0.9785	0.062252	1.04409	0.600172	0.993085	0.026879	1.01881	0.292865	1	0.0625807	1.04433	33.5406	33.5637	33.5726	33.5195	33.566	33.5762	33.5192	33.6143	33.4992	33.5069	33.5823
P84091	AP-2 complex subunit mu	Ap2m1	0.416143	0.945442	0.040737	1.02864	0.500475	0.969446	0.068012	1.04827	0.748458	0.975637	0.0272751	1.01909	0.896239	0.985722	-0.00996971	0.993113	0.469436	1	0.0470467	1.03315	0.494372	0.928118	0.0991516	1.07114	0.702468	0.994512	0.0521049	1.03678	0.182668	0.934778	0.0748711	1.05327	0.46951	1	0.136946	1.09957	33.5165	33.4987	33.4363	33.331	33.462	33.4376	33.4298	33.3162	33.3788	33.3933	33.5262
E9Q3M9	DUF4592 domain-containing protein	2010300C02Rik	0.748429	0.956163	0.0362022	1.02541	0.446733	0.919274	0.156721	1.11475	0.522457	0.903213	0.120518	1.08713	0.327612	0.705842	-0.286263	0.820024	0.90012	0.998283	-0.0184759	0.987275	0.12363	0.674897	0.37323	1.29525	0.118278	0.842317	0.391706	1.31194	0.230129	0.800639	-0.20913	0.865059	0.181477	1	0.468838	1.38399	33.4971	33.7731	33.6116	33.4544	33.3678	33.477	33.6419	33.4479	33.8047	33.9247	33.4926
P51863	V-type proton ATPase subunit d 1	Atp6v0d1	0.94896	0.986951	0.0137135	1.00955	0.706235	0.968538	0.0906246	1.06483	0.74847	0.948987	0.0769112	1.05476	0.638255	0.859548	-0.158737	0.895809	0.846089	0.999262	-0.0639928	0.956613	0.632024	0.920175	0.170017	1.12507	0.558641	0.957641	0.23401	1.1761	0.516013	0.860386	-0.240304	0.846567	0.731754	1	0.152443	1.11145	33.5418	33.8766	33.7122	33.2576	33.344	33.5343	34.1635	33.5269	33.3478	33.3247	33.8711
Q76MZ3	Serine/threonine-protein phosphatase 2A 65 kDa regulatory subunit A alpha isoform	Ppp2r1a	0.817053	0.985712	-0.0123327	0.991488	0.669854	0.988425	0.030411	1.0213	0.376288	0.947538	0.0427437	1.03007	0.386521	0.884188	-0.0746841	0.94955	0.960459	0.999489	0.00340525	1.00236	0.114965	0.899599	0.124434	1.09008	0.00355113	0.911222	0.121029	1.08751	0.210517	0.966457	-0.0435079	0.970293	0.0546858	1	0.152205	1.11127	33.3799	33.6021	33.5412	33.3942	33.4822	33.449	33.515	33.5386	33.4738	33.4744	33.6062
O08749	Dihydrolipoyl dehydrogenase, mitochondrial	Dld	0.320867	0.935325	0.0520676	1.03675	0.591352	0.987861	0.0292007	1.02045	0.567775	0.97587	-0.0228668	0.984275	0.448291	0.957298	-0.0264473	0.981835	0.278781	1	0.0777512	1.05537	0.42559	0.961758	0.0572713	1.0405	0.427435	1	-0.0204798	0.985905	0.00534575	0.864258	0.0982742	1.07049	0.0549556	1	0.104242	1.07493	33.5011	33.3841	33.569	33.3866	33.467	33.4672	33.3875	33.3675	33.3514	33.5218	33.4653
P20152	Vimentin	Vim	0.219606	0.810899	-0.159567	0.895294	0.00857928	0.499469	0.484717	1.39931	0.000391993	0.218341	0.644283	1.56296	0.0227806	0.32794	0.558689	1.47293	0.445825	1	-0.155838	0.897611	0.0569824	0.492364	0.545508	1.45953	0.0192615	0.688255	0.701346	1.62602	0.996985	1	-0.000652949	0.999548	0.507519	1	0.142004	1.10344	34.1361	33.8833	34.1912	34.3817	34.3895	34.225	34.2331	34.5315	34.1593	33.7242	33.773
P61205;P84078;Q8BSL7	ADP-ribosylation factor 3;ADP-ribosylation factor 1;ADP-ribosylation factor 2	Arf3;Arf1	0.858208	0.980674	0.015667	1.01092	0.833676	0.993104	0.020063	1.014	0.962392	0.993137	0.00439606	1.00305	0.188425	0.718873	-0.182642	0.881088	0.861044	0.999623	-0.0170542	0.988248	0.402299	0.910167	0.112034	1.08075	0.34446	0.965667	0.129088	1.0936	0.186075	0.820328	-0.171207	0.888099	0.382703	1	0.140523	1.1023	33.2437	33.4135	33.4816	33.2653	33.1602	33.3051	33.5123	33.4129	33.2864	33.357	33.4735
P12787	Cytochrome c oxidase subunit 5A, mitochondrial	Cox5a	0.511104	0.946295	0.0423845	1.02981	0.159117	0.944257	0.0802103	1.05717	0.51418	0.956732	0.0378258	1.02657	0.0247376	0.702386	0.158197	1.11589	0.0487152	0.993315	0.138995	1.10114	0.203252	0.911471	0.0965729	1.06923	0.565216	0.994247	-0.042422	0.971023	0.0505433	0.792304	0.159633	1.117	0.618113	1	-0.0409864	0.97199	33.3383	33.5299	33.4283	33.4499	33.497	33.4829	33.3911	33.3418	33.2581	33.3074	33.3561
Q9Z2I9	Succinate--CoA ligase [ADP-forming] subunit beta, mitochondrial	Sucla2	0.00521219	0.806965	-0.121119	0.919474	0.0337247	0.939796	-0.0779631	0.947394	0.196038	0.951363	0.0431564	1.03037	0.0250728	0.741193	0.1224	1.08854	0.0846618	1	-0.0977987	0.934458	0.0196866	0.895964	-0.107471	0.928213	0.790016	0.998308	-0.0096728	0.993318	0.318931	0.963233	0.0509421	1.03594	0.0196189	1	-0.081131	0.945316	33.2425	33.2246	33.2292	33.3089	33.4076	33.3984	33.418	33.3182	33.3199	33.2998	33.2614
P08228	Superoxide dismutase [Cu-Zn]	Sod1	0.781923	0.974252	-0.0178078	0.987732	0.83456	0.992522	-0.0108963	0.992476	0.909242	0.990319	0.00691147	1.0048	0.101467	0.798737	0.104923	1.07544	0.579975	1	0.0416667	1.0293	0.841313	0.992639	-0.0167631	0.988448	0.493928	0.980452	-0.0584297	0.960309	0.0881696	0.813019	0.158455	1.11609	0.956233	1	-0.00489807	0.996611	33.4725	33.3962	33.4193	33.5552	33.558	33.5894	33.3186	33.4593	33.4678	33.5014	33.4361
P62880	Guanine nucleotide-binding protein G(I)/G(S)/G(T) subunit beta-2	Gnb2	0.259912	0.961342	-0.0202555	0.986058	0.51193	0.984643	-0.0304132	0.97914	0.810356	0.990552	-0.0101578	0.992984	0.135306	0.851937	-0.0768471	0.948127	0.767732	0.998718	-0.00533422	0.996309	0.256012	0.988778	0.0289675	1.02028	0.240746	0.995188	0.0343018	1.02406	0.235584	0.978761	0.0366459	1.02573	0.0178813	1	0.147795	1.10787	33.4064	33.4154	33.4164	33.3906	33.471	33.4279	33.405	33.4411	33.3923	33.5032	33.5494
P19783	Cytochrome c oxidase subunit 4 isoform 1, mitochondrial	Cox4i1	0.368995	0.939565	-0.0475698	0.967565	0.944541	0.99725	0.00991535	1.0069	0.639029	0.950399	0.0574852	1.04065	0.242996	0.898677	-0.0521965	0.964467	0.945378	0.99634	0.00471497	1.00327	0.508586	0.909691	0.135321	1.09834	0.508673	0.972767	0.130606	1.09475	0.177246	0.935373	0.0684141	1.04856	0.355585	1	0.251217	1.19021	33.2353	33.4279	33.2306	33.3465	33.395	33.4025	33.3407	33.2738	33.3765	33.4193	33.4826
P00405	Cytochrome c oxidase subunit 2	Mtco2	0.533948	0.931159	-0.0685375	0.953604	0.285488	0.892374	0.206347	1.15376	0.128392	0.703704	0.274885	1.2099	0.242198	0.71868	0.217241	1.16251	0.811509	0.99409	0.0309296	1.02167	0.249344	0.789398	0.344243	1.26949	0.267878	0.899936	0.313314	1.24256	0.25006	0.830455	0.18367	1.13577	0.424389	1	0.279743	1.21398	33.4544	33.7387	33.5501	33.3864	33.841	33.5813	33.6484	33.5137	33.4203	33.519	33.4688
Q91VR2	ATP synthase subunit gamma, mitochondrial	Atp5f1c	0.427469	0.932614	0.0580772	1.04108	0.820423	0.992178	0.0155579	1.01084	0.58968	0.954054	-0.0425194	0.970958	0.03666	0.712006	0.152489	1.11149	0.0599973	0.99953	0.139723	1.10169	0.741743	0.991461	-0.0328013	0.97752	0.109606	0.907813	-0.172525	0.887289	0.00812341	0.676007	0.216262	1.16172	0.378166	1	-0.108751	0.92739	33.3827	33.2942	33.3423	33.4532	33.4506	33.4289	33.2597	33.1733	33.2375	33.3153	33.2593
Q8VDD5	Myosin-9	Myh9	0.854822	0.97315	0.0221325	1.01546	0.856843	0.991391	0.0164341	1.01146	0.959437	0.993589	-0.00569839	0.996058	0.434954	0.758629	-0.215601	0.861187	0.274026	1	-0.107152	0.928419	0.829315	0.989417	0.0270844	1.01895	0.200325	0.934626	0.134237	1.09751	0.185315	0.75018	-0.259664	0.835282	0.542627	1	0.0901737	1.0645	33.459	33.2563	33.2968	33.519	33.0051	33.4046	33.4835	33.4204	33.4896	33.3223	33.5186
P17427	AP-2 complex subunit alpha-2	Ap2a2	0.250846	0.909209	0.0677916	1.04811	0.51212	0.979756	0.038896	1.02733	0.649331	0.969257	-0.0288956	0.98017	0.271738	0.795053	-0.127789	0.915233	0.499126	1	0.0593262	1.04198	0.163558	0.907601	0.0963593	1.06907	0.664932	0.997944	0.0370331	1.026	0.771859	0.993546	-0.0310141	0.978732	0.153314	1	0.133808	1.09719	33.3227	33.3051	33.4192	33.291	33.1935	33.3027	33.4136	33.1862	33.2375	33.3107	33.4411
Q61885	Myelin-oligodendrocyte glycoprotein	Mog	0.0345626	0.685214	-0.260122	0.835017	0.250938	0.836869	-0.408313	0.753504	0.635293	0.908769	-0.148191	0.902381	0.881641	0.964358	0.0495625	1.03495	0.192023	0.967429	-0.243748	0.844549	0.338175	0.785897	-0.523774	0.69555	0.609491	0.964233	-0.280027	0.823576	0.829975	0.987128	0.0477829	1.03368	0.697405	1	-0.281806	0.82256	32.9073	32.8795	32.9197	32.8896	33.1339	33.2418	32.8409	33.3601	33.2192	33.4273	32.8492
P68254	14-3-3 protein theta	Ywhaq	0.054719	0.906476	-0.0613953	0.958337	0.0119985	0.884644	-0.149985	0.90126	0.0512253	0.877744	-0.0885895	0.940442	0.624194	0.945632	-0.0353146	0.975819	0.192661	1	-0.0546913	0.9628	0.039578	0.814605	-0.178797	0.883439	0.0796539	0.927451	-0.124106	0.917572	0.47535	0.986956	0.0275459	1.01928	0.47527	1	-0.0612456	0.958436	33.128	33.1475	33.0489	33.1356	33.2289	33.157	33.1347	33.173	33.1885	33.1783	33.2782
Q91XM9	Disks large homolog 2	Dlg2	0.0696183	0.629171	0.337813	1.26384	0.515397	0.922667	0.174898	1.12888	0.528592	0.879026	-0.162914	0.893219	0.189741	0.423037	-0.652639	0.636115	0.311104	1	0.135399	1.0984	0.415106	0.871652	0.298968	1.23026	0.632409	0.977154	0.163569	1.12005	0.10916	0.674491	-0.395655	0.760144	0.41432	1	0.420553	1.33844	33.6468	33.446	33.6624	33.3021	33.1563	32.7219	33.3922	33.2311	33.3811	33.3383	33.8452
Q8BLK3	Limbic system-associated membrane protein	Lsamp	0.369836	0.818822	0.181738	1.13425	0.782947	0.980139	-0.0683243	0.953745	0.344263	0.79314	-0.250062	0.84086	0.397401	0.669573	-0.536982	0.689211	0.905323	0.996977	0.0187734	1.0131	0.879653	0.989065	-0.0400085	0.972649	0.823991	0.998691	-0.0587819	0.960074	0.0446523	0.761371	-0.546761	0.684555	0.892006	1	-0.0685616	0.953588	33.032	33.3918	33.3251	33.0479	32.5636	32.8151	33.4443	33.1443	33.1198	32.7395	33.7132
P70404	Isocitrate dehydrogenase [NAD] subunit gamma 1, mitochondrial	Idh3g	0.0323896	0.772218	0.174383	1.12848	0.578078	0.969811	0.0775419	1.05522	0.402098	0.905026	-0.0968414	0.935078	0.590594	0.930158	-0.0458717	0.968704	0.0387813	0.939759	0.243783	1.18409	0.614332	0.94031	0.112962	1.08145	0.530847	0.974288	-0.130821	0.913311	0.0935462	0.886738	0.0930456	1.06662	0.976139	1	0.00809606	1.00563	33.4828	33.7379	33.6341	33.4626	33.5114	33.4102	33.3781	33.365	33.3601	33.5583	33.455
Q8CHC4	Synaptojanin-1	Synj1	0.0746905	0.858366	0.0837496	1.05977	0.764472	0.990495	0.0166262	1.01159	0.231048	0.923312	-0.0671234	0.954539	0.152723	0.787679	-0.116772	0.922249	0.216226	1	0.0916951	1.06562	0.452858	0.962354	0.0576706	1.04078	0.686817	0.999996	-0.0340246	0.976692	0.855375	1	0.0135975	1.00947	0.334348	1	0.0963446	1.06906	33.2233	33.2423	33.2905	33.1672	33.1309	33.1796	33.2432	33.1021	33.0796	33.2263	33.3177
Q9Z2Q6	Septin-5	Septin5	0.495228	0.939399	-0.053894	0.963333	0.180799	0.902169	-0.123231	0.918129	0.273238	0.923472	-0.0693367	0.953076	0.357982	0.893693	0.0612831	1.04339	0.448368	1	-0.0788256	0.946828	0.0587184	0.760483	-0.235242	0.849542	0.0857376	0.909206	-0.156417	0.897251	0.533422	0.964249	0.0541115	1.03822	0.068804	1	-0.163588	0.892802	33.2552	32.9198	33.1046	33.1823	33.2512	33.1524	33.1872	33.2122	33.0437	33.1559	33.1252
Q8K0U4	Heat shock 70 kDa protein 12A	Hspa12a	0.653884	0.982718	-0.0121056	0.991644	0.0694041	0.904348	-0.112533	0.924963	0.0729106	0.857493	-0.100427	0.932757	0.0648639	0.821428	-0.0893345	0.939956	0.868749	0.999343	0.00534312	1.00371	0.280501	0.912363	-0.102479	0.931431	0.260612	0.961703	-0.107822	0.927988	0.17402	0.952969	0.0562515	1.03976	0.738334	1	0.0377636	1.02652	33.2258	33.242	33.2058	33.1688	33.2368	33.2761	33.2044	33.1606	33.2356	33.3322	33.3594
A8DUK4;P02088	GLOBIN domain-containing protein;Hemoglobin subunit beta-1	Hbb-bs;Hbb-b1	0.388701	0.726204	-0.869867	0.547197	0.0373859	0.226167	-1.59128	0.331878	0.405914	0.73496	-0.72141	0.606504	0.721788	0.853138	0.340677	1.26635	0.65532	1	-0.665501	0.63047	0.0783539	0.325964	-2.09497	0.234073	0.335722	0.855219	-1.42947	0.371268	0.642346	0.862524	0.851775	1.80472	0.282532	1	-0.918371	0.529106	32.6946	33.2628	30.8434	32.3414	32.8348	34.4981	30.7498	32.8262	34.868	33.3358	33.3158
Q80TJ1	Calcium-dependent secretion activator 1	Cadps	0.6729	0.957288	0.0306873	1.0215	0.627639	0.982439	0.039716	1.02791	0.911009	0.991859	0.00902863	1.00628	0.231369	0.745148	-0.161367	0.894177	0.938339	0.998112	-0.00806554	0.994425	0.250219	0.909162	0.11456	1.08265	0.262887	0.955323	0.122626	1.08871	0.369446	0.904108	-0.10747	0.928215	0.166086	1	0.176524	1.13016	33.2338	33.3235	33.3039	33.1248	33.1074	33.1952	33.4039	33.2181	33.1544	33.2285	33.3969
Q7TPR4	Alpha-actinin-1	Actn1	0.280736	0.941527	0.0397326	1.02792	0.202207	0.895488	0.188273	1.1394	0.250042	0.833176	0.14854	1.10845	0.759895	0.968602	0.0232182	1.01622	0.173585	1	0.0715892	1.05087	0.168672	0.762398	0.303678	1.23429	0.279192	0.907578	0.232089	1.17453	0.606236	0.985865	0.032987	1.02313	0.383941	1	0.241858	1.18251	33.3723	33.4495	33.4628	33.4285	33.3834	33.4333	33.4073	33.2919	33.4269	33.3236	33.4467
Q9QXS6	Drebrin	Dbn1	0.26954	0.837741	0.124653	1.09025	0.800588	0.992583	0.0242184	1.01693	0.246825	0.882933	-0.100435	0.932752	0.166176	0.681139	-0.226757	0.854554	0.782244	1	0.0446866	1.03146	0.830478	0.989592	0.0284665	1.01993	0.89436	1	-0.0162201	0.98882	0.405593	0.88809	-0.127582	0.915364	0.48143	1	0.082955	1.05919	33.3627	33.1814	33.0936	33.4658	33.1015	33.0478	33.1615	33.051	33.3943	33.1987	33.4041
Q8K2B3	Succinate dehydrogenase [ubiquinone] flavoprotein subunit, mitochondrial	Sdha	0.974319	0.996565	0.00162964	1.00113	0.793299	0.991586	0.0155716	1.01085	0.64097	0.983969	0.013942	1.00971	0.252007	0.885937	0.0634403	1.04495	0.653869	1	0.03427	1.02404	0.858431	0.992423	0.015213	1.0106	0.644348	1	-0.019057	0.986878	0.124758	0.986529	0.0263481	1.01843	0.391577	1	-0.0561492	0.961828	33.1331	33.1074	33.2065	33.3505	33.201	33.226	33.194	33.1744	33.1931	33.1123	33.1879
Q9WV92	Band 4.1-like protein 3	Epb41l3	0.210041	0.837455	-0.11027	0.926415	0.057097	0.823531	-0.254049	0.83854	0.262693	0.839275	-0.143779	0.905145	0.407927	0.898184	-0.0571842	0.961138	0.309253	1	-0.141015	0.906881	0.0899185	0.666735	-0.342524	0.78866	0.354142	0.914735	-0.201509	0.869641	0.715916	0.974419	-0.0633272	0.957054	0.366755	1	-0.207652	0.865946	33.045	32.973	33.0566	33.0404	33.1559	33.0461	33.0481	33.4012	33.0437	33.1615	33.1549
P63044	Vesicle-associated membrane protein 2	Vamp2	0.982786	0.997036	0.00200272	1.00139	0.722402	0.980044	0.052018	1.03671	0.725531	0.957182	0.0500153	1.03528	0.544676	0.875932	0.101305	1.07274	0.754101	0.997435	0.0374641	1.02631	0.812036	0.989678	0.0532862	1.03763	0.947251	0.99886	0.0158221	1.01103	0.334516	0.857724	0.157579	1.11541	0.810864	1	0.0720959	1.05124	33.1545	33.1114	33.0854	32.9359	33.09	33.2388	33.1933	32.8651	32.9619	32.9444	33.1817
Q8BG05	Heterogeneous nuclear ribonucleoprotein A3	Hnrnpa3	0.401834	0.931436	0.0567892	1.04015	0.679941	0.990467	0.0281569	1.01971	0.618201	0.970151	-0.0286324	0.980349	0.382595	0.828513	-0.119596	0.920445	0.995842	1	0.000456492	1.00032	0.726284	0.992162	0.0324669	1.02276	0.586154	0.999134	0.0320104	1.02244	0.085945	0.851978	-0.127489	0.915423	0.813545	1	0.0241178	1.01686	33.3488	33.3334	33.4546	33.1942	33.2346	33.1643	33.2602	33.3649	33.3557	33.4209	33.2172
P60761	Neurogranin	Nrgn	0.575649	0.912847	-0.0958212	0.935739	0.457897	0.94091	0.112538	1.08113	0.237845	0.792936	0.208359	1.15537	0.288348	0.609033	0.498751	1.41299	0.892542	0.999038	0.0184263	1.01285	0.788103	0.99158	0.0331904	1.02327	0.891839	1	0.0147641	1.01029	0.0699551	0.699338	0.433698	1.35069	0.850506	1	-0.0502885	0.965743	33.3655	32.9346	33.2538	33.1975	33.6993	33.3884	33.2433	32.9607	33.1266	33.3567	32.7336
P63001;Q05144	Ras-related C3 botulinum toxin substrate 1;Ras-related C3 botulinum toxin substrate 2	Rac1;Rac2	0.654704	0.959654	-0.0261086	0.982066	0.619791	0.98828	0.0283234	1.01983	0.403724	0.942669	0.0544319	1.03845	0.11845	0.884736	0.0593243	1.04198	0.988219	1	-0.00114568	0.999206	0.533371	0.970131	0.0500247	1.03528	0.611276	0.990121	0.0511703	1.03611	0.317938	0.903289	0.102732	1.0738	0.348833	1	0.0945778	1.06775	33.2172	33.1125	33.1292	33.2164	33.2351	33.2781	33.064	33.2811	33.1164	33.1908	33.2037
Q8BVE3	V-type proton ATPase subunit H	Atp6v1h	0.128437	0.867394	0.0822258	1.05865	0.868554	0.995097	-0.00971756	0.993287	0.115351	0.880404	-0.0919434	0.938258	0.0750459	0.747722	-0.12904	0.91444	0.209522	1	0.0971196	1.06964	0.667624	0.991786	0.0299072	1.02095	0.346922	0.978717	-0.0672124	0.95448	0.33062	0.945767	0.0715415	1.05084	0.11289	1	0.133369	1.09685	33.2754	33.2169	33.3038	33.141	33.1664	33.2236	33.2087	33.0564	33.1052	33.2998	33.3482
P99029	Peroxiredoxin-5, mitochondrial	Prdx5	0.518888	0.948249	-0.0405621	0.972276	0.757985	0.992778	-0.0246288	0.983073	0.80447	0.983505	0.0159332	1.01111	0.390092	0.907824	0.0513763	1.03625	0.862268	0.996173	0.014974	1.01043	0.953057	0.994896	0.00727844	1.00506	0.945	0.997769	-0.00769552	0.99468	0.309513	0.936003	0.0753969	1.05365	0.904684	1	0.016325	1.01138	33.1322	33.3667	33.149	33.1854	33.2657	33.3225	33.2916	33.2279	33.1367	33.2051	33.2804
Q8BFR5	Elongation factor Tu, mitochondrial	Tufm	0.482308	0.956653	-0.0275764	0.981067	0.284383	0.946814	-0.0829529	0.944123	0.441009	0.943444	-0.0553764	0.962343	0.900272	0.983998	-0.0120678	0.99167	0.455499	0.997684	0.0235634	1.01647	0.594043	0.966166	-0.0606855	0.958808	0.476823	0.977914	-0.0842489	0.943276	0.165055	0.90573	0.0878557	1.06279	0.920615	1	0.0156746	1.01092	33.1641	33.2044	33.2401	33.2398	33.2462	33.3386	33.179	33.2565	33.178	33.3759	33.2329
Q9CQV8	14-3-3 protein beta/alpha	Ywhab	0.190056	0.925775	-0.056498	0.961595	0.147319	0.903922	-0.116454	0.922452	0.364726	0.934542	-0.0599556	0.959294	0.262433	0.802895	-0.120213	0.920052	0.492506	1	-0.0410601	0.97194	0.561304	0.9636	-0.0608444	0.958703	0.842883	1	-0.0197843	0.98638	0.941371	1	0.00440534	1.00306	0.453787	1	0.104834	1.07537	33.1703	33.2183	33.3001	33.1566	33.2283	33.3126	33.3363	33.2308	33.2311	33.3252	33.4561
Q8BMF4	Dihydrolipoyllysine-residue acetyltransferase component of pyruvate dehydrogenase complex, mitochondrial	Dlat	0.862791	0.987122	0.0110899	1.00772	0.175268	0.903166	0.122796	1.08884	0.17852	0.855601	0.111706	1.08051	0.957176	0.990317	-0.00588799	0.995927	0.78992	0.995454	0.0254046	1.01777	0.0688254	0.788029	0.215506	1.16111	0.109015	0.895061	0.190102	1.14084	0.975452	1	-0.00331942	0.997702	0.14426	1	0.19267	1.14288	33.2077	33.3078	33.3486	33.1542	33.1751	33.308	33.3631	33.1321	33.2393	33.1766	33.3182
Q91YT0	NADH dehydrogenase [ubiquinone] flavoprotein 1, mitochondrial	Ndufv1	0.627765	0.967151	-0.0188494	0.98702	0.129394	0.923518	-0.0915476	0.938515	0.0779698	0.908073	-0.0726982	0.950858	0.462286	0.894609	-0.0681381	0.953868	0.733562	0.998787	0.0132713	1.00924	0.345607	0.957745	-0.0624669	0.957625	0.196619	0.975326	-0.0757383	0.948856	0.948741	1	-0.00148137	0.998974	0.918735	1	-0.00908152	0.993725	33.0124	33.2077	33.1312	33.0909	33.1094	33.1476	33.1148	33.1211	33.1541	33.1236	33.2697
P68510	14-3-3 protein eta	Ywhah	0.615421	0.95612	0.0303343	1.02125	0.286126	0.953981	0.0721792	1.0513	0.461673	0.952856	0.0418449	1.02943	0.189255	0.840269	-0.0930347	0.937549	0.915392	0.999403	0.00957616	1.00666	0.109684	0.891502	0.141341	1.10293	0.0740492	0.915959	0.131765	1.09563	0.456127	0.957047	-0.0635548	0.956903	0.00916052	1	0.161245	1.11825	33.205	33.1887	33.3527	33.1295	33.1074	33.1935	33.3027	33.1224	33.2171	33.2235	33.2636
Q9ERK4	Exportin-2	Cse1l	0.938083	0.989675	-0.00447826	0.996901	0.600551	0.988162	0.0281572	1.01971	0.595252	0.963653	0.0326355	1.02288	0.632608	0.926567	0.0513172	1.03621	0.748649	1	0.0213712	1.01492	0.623107	0.980855	0.0415522	1.02922	0.820262	1	0.020181	1.01409	0.436537	0.938099	0.0821006	1.05856	0.604721	1	0.0509644	1.03596	33.2255	33.2356	33.1193	33.2376	33.3482	33.1682	33.1345	33.2727	33.1213	33.1885	33.2253
Q9QYC0	Alpha-adducin	Add1	0.916252	0.99314	-0.00286102	0.998019	0.168451	0.94469	0.0816002	1.05819	0.0998086	0.88769	0.0844612	1.06029	0.652375	0.959334	0.0270615	1.01893	0.672799	0.999886	0.0152384	1.01062	0.0390945	0.868125	0.137966	1.10035	0.0180454	0.911376	0.122728	1.08879	0.0292233	0.953121	0.0528749	1.03733	0.0724431	1	0.148541	1.10845	33.1977	33.1663	33.2501	33.1402	33.2071	33.2392	33.162	33.1784	33.1705	33.2452	33.147
P01942	Hemoglobin subunit alpha	Hba	0.470975	0.777285	-0.689216	0.620191	0.025792	0.207487	-1.5396	0.34398	0.322475	0.663641	-0.850386	0.554636	0.784901	0.892564	0.250542	1.18965	0.742411	1	-0.455299	0.729359	0.0545538	0.251474	-2.03964	0.243225	0.280454	0.788437	-1.58434	0.333478	0.590031	0.834858	0.972373	1.96206	0.282238	1	-0.862506	0.549996	32.6082	32.8419	30.9299	32.1923	32.6152	34.2162	30.5243	32.2609	34.5448	33.244	33.0863
Q9D6M3	Mitochondrial glutamate carrier 1	Slc25a22	0.372732	0.841593	-0.125568	0.916643	0.761655	0.991975	-0.0275637	0.981076	0.485254	0.909684	0.0980042	1.07029	0.054543	0.466059	0.307615	1.23766	0.49754	1	0.0678418	1.04815	0.845942	0.989873	0.0261052	1.01826	0.790748	0.997872	-0.0417366	0.971485	0.0316142	0.698835	0.420036	1.33796	0.696619	1	0.0706838	1.05021	32.9434	32.9794	33.1008	33.0548	33.3711	33.4233	33.136	32.8511	32.9444	33.1599	33.0193
Q60931	Voltage-dependent anion-selective channel protein 3	Vdac3	0.750405	0.950186	0.0471636	1.03323	0.930865	0.992868	-0.0171583	0.988177	0.700377	0.948205	-0.0643219	0.956395	0.587585	0.837656	0.178522	1.13172	0.444259	1	0.163715	1.12017	0.819108	0.98568	-0.0625025	0.957602	0.337706	0.910466	-0.226218	0.854873	0.133686	0.733401	0.255644	1.19387	0.668815	1	-0.149096	0.901816	32.7082	32.5879	32.5976	33.1105	32.9329	32.7816	32.5392	32.4931	32.7727	32.4104	32.9471
Q3UHL1	CaM kinase-like vesicle-associated protein	Camkv	0.536941	0.940258	0.0485622	1.03423	0.0446809	0.87841	0.17924	1.13229	0.134803	0.832555	0.130678	1.09481	0.248812	0.895408	0.0542336	1.03831	0.52405	1	0.0799268	1.05696	0.0207297	0.666094	0.261567	1.19878	0.146701	0.906849	0.181641	1.13417	0.561334	0.954004	0.0808385	1.05763	0.0218314	1	0.208246	1.15528	33.28	33.3031	33.3691	33.1563	33.2637	33.2904	33.2858	33.0047	33.2982	33.1919	33.2538
P07724	Serum albumin	Alb	0.404847	0.777504	-0.445745	0.734205	0.140008	0.61434	-0.793877	0.576792	0.564914	0.84209	-0.348132	0.785601	0.639962	0.826691	-0.278923	0.824206	0.495462	0.9725	-0.561312	0.677685	0.268561	0.634812	-0.955583	0.515633	0.717209	0.976181	-0.394271	0.760874	0.964417	1	-0.048144	0.96718	0.872056	1	-0.163492	0.892862	33.1395	33.105	32.3815	32.7764	32.7926	33.7422	32.5151	32.6801	34.7515	33.7354	33.3573
Q61316	Heat shock 70 kDa protein 4	Hspa4	0.00474042	0.867836	-0.0726921	0.950862	0.254387	0.95107	-0.0728081	0.950786	0.998296	0.999513	-0.000115967	0.99992	0.973071	0.998129	0.000553131	1.00038	0.0585306	1	-0.0710793	0.951926	0.489547	0.957778	-0.0716413	0.951555	0.995589	1	-0.000562032	0.999611	0.770358	1	0.0097065	1.00675	0.947453	1	0.00859133	1.00597	33.0601	33.0799	33.0469	33.0263	33.1456	33.118	33.1617	33.1195	33.0851	33.1357	33.1268
O88342	WD repeat-containing protein 1	Wdr1	0.177776	0.939338	-0.0444445	0.969663	0.356933	0.951571	0.0798056	1.05688	0.111051	0.829997	0.12425	1.08994	0.333567	0.957174	0.0254555	1.0178	0.784456	0.997905	-0.00963593	0.993343	0.116681	0.831729	0.180477	1.13326	0.101059	0.893786	0.190113	1.14085	0.345675	0.984828	0.0313752	1.02199	0.181655	1	0.196033	1.14554	33.0024	33.1072	33.1245	33.0427	33.1274	33.1376	33.1071	33.0611	33.1351	33.0876	33.1265
Q7TQF7	Amphiphysin	Amph	0.985637	0.999076	-0.000717926	0.999502	0.849863	0.992655	-0.0240532	0.983466	0.84164	0.977938	-0.0233353	0.983955	0.0666908	0.641308	-0.209969	0.864556	0.898949	0.998111	-0.00795237	0.994503	0.556633	0.941191	0.0931346	1.06669	0.553484	0.981259	0.101087	1.07258	0.816612	0.989799	-0.0198854	0.986311	0.224637	1	0.29117	1.22363	32.9262	32.9259	32.9184	32.943	32.8871	32.9473	32.9748	32.8226	33.0138	33.0786	33.1757
Q64521	Glycerol-3-phosphate dehydrogenase, mitochondrial	Gpd2	0.235749	0.940289	0.0394077	1.02769	0.384115	0.946637	0.0847744	1.06052	0.59701	0.952004	0.0453667	1.03195	0.994259	0.997902	-0.000597	0.999586	0.0314523	1	0.08181	1.05835	0.258354	0.900005	0.157819	1.1156	0.55326	0.978643	0.0760091	1.0541	0.0106698	0.88523	0.0883897	1.06318	0.379993	1	0.164996	1.12116	33.0405	33.0672	33.1114	33.0274	33.0923	33.0582	32.9768	32.9838	33	33.0043	33.1474
Q9DC69	NADH dehydrogenase [ubiquinone] 1 alpha subcomplex subunit 9, mitochondrial	Ndufa9	0.384254	0.934113	0.0569635	1.04027	0.235971	0.90475	-0.126137	0.916281	0.0443408	0.762964	-0.183101	0.880808	0.64712	0.916385	-0.0572376	0.961103	0.143348	1	0.119283	1.08619	0.216186	0.899628	-0.147727	0.902672	0.0511419	0.865288	-0.26701	0.83104	0.621592	0.98563	0.0334066	1.02343	0.283871	1	-0.176366	0.88493	32.7219	32.8209	32.9431	32.9893	32.8683	32.7955	32.7148	32.8502	32.8305	32.9901	32.7882
Q91ZZ3	Beta-synuclein	Sncb	0.883373	0.987211	-0.0085907	0.994063	0.0723911	0.883124	-0.170779	0.888363	0.0736847	0.796313	-0.162188	0.893669	0.634151	0.975519	0.0146961	1.01024	0.821177	0.998667	-0.0197296	0.986418	0.00259122	0.539328	-0.29984	0.812342	0.0273542	0.853433	-0.280111	0.823528	0.740493	0.986891	0.0356452	1.02502	0.0108923	1	-0.259162	0.835573	32.8527	32.7669	32.7947	32.6917	32.8172	32.7958	32.8196	32.8707	32.6222	32.7676	32.816
P00920	Carbonic anhydrase 2	Ca2	0.386352	0.884962	-0.0897524	0.939684	0.806592	0.991379	-0.0305902	0.97902	0.662409	0.949554	0.0591621	1.04186	0.54289	0.832048	-0.16176	0.893934	0.401476	1	-0.135484	0.910364	0.51088	0.958694	0.0709597	1.05042	0.265602	0.915917	0.206444	1.15384	0.517989	0.913121	-0.128503	0.91478	0.311922	1	0.239701	1.18075	33.0056	32.9314	33.1006	33.053	33.0617	33.0089	32.9493	33.4142	33.1278	33.418	32.9761
P47857	ATP-dependent 6-phosphofructokinase, muscle type	Pfkm	0.101318	0.894168	0.069652	1.04946	0.362382	0.970901	0.0603678	1.04273	0.883971	0.991548	-0.00928421	0.993585	0.97243	0.991068	0.00564766	1.00392	0.23916	1	0.0701332	1.04981	0.457224	0.968707	0.0508944	1.03591	0.809503	1	-0.0192388	0.986753	0.953505	1	0.00456238	1.00317	0.881669	1	-0.0203241	0.986011	33.113	33.1443	33.1046	33.0741	32.9886	33.0956	33.0977	33.0688	32.946	32.9019	33.171
Q9Z140	Copine-6	Cpne6	0.624841	0.941966	0.0508905	1.0359	0.157489	0.866909	0.249758	1.18901	0.251153	0.799958	0.198867	1.1478	0.578065	0.944025	0.0347462	1.02438	0.533418	1	0.102683	1.07377	0.0896968	0.608951	0.410964	1.32957	0.25095	0.900132	0.308281	1.23823	0.590049	0.93633	0.11274	1.08128	0.196424	1	0.386274	1.30701	33.0532	33.0946	33.1481	32.9971	33.1196	33.0603	33.1923	32.7033	33.0362	33.0116	33.0989
Q80SW1	S-adenosylhomocysteine hydrolase-like protein 1	Ahcyl1	0.223291	0.931232	-0.0547674	0.96275	0.0855979	0.901702	-0.126135	0.916283	0.26955	0.919897	-0.0713676	0.951735	0.92535	0.991017	0.00534058	1.00371	0.722206	0.997754	-0.0170695	0.988238	0.233037	0.895945	-0.139576	0.907786	0.272674	0.958313	-0.122506	0.91859	0.157358	0.899929	0.0908012	1.06496	0.778901	1	-0.0370458	0.974649	32.9514	32.9439	32.9021	33.0248	33.1107	33.0189	32.9271	33.0189	32.976	33.0805	33.0385
Q9WUM5	Succinate--CoA ligase [ADP/GDP-forming] subunit alpha, mitochondrial	Suclg1	0.667739	0.957891	-0.0282837	0.980586	0.80468	0.993604	-0.0216278	0.985121	0.941646	0.991002	0.00665588	1.00462	0.826074	0.959024	0.0419006	1.02947	0.6605	0.999457	0.0270284	1.01891	0.929676	0.99673	0.0101878	1.00709	0.886424	1	-0.0168406	0.988395	0.277411	0.877231	0.128235	1.09296	0.699101	1	0.0694936	1.04935	33.1123	33.1181	33.1974	33.0697	33.3358	33.1234	33.0166	33.1287	33.1588	33.3176	33.0578
P61979	Heterogeneous nuclear ribonucleoprotein K	Hnrnpk	0.0762872	0.860966	-0.0831141	0.944018	0.906791	0.9973	-0.0082346	0.994308	0.284953	0.914058	0.0748795	1.05327	0.803232	0.956502	0.04105	1.02886	0.17324	1	-0.0854238	0.942508	0.84523	0.992223	0.0120087	1.00836	0.251016	0.969859	0.0974325	1.06987	0.641122	0.985461	0.036293	1.02548	0.510448	1	0.0926755	1.06635	33.1258	33.0433	33.0362	33.096	33.2245	33.1359	33.0746	33.2362	33.1209	33.2768	33.0015
P62761	Visinin-like protein 1	Vsnl1	0.655036	0.957463	-0.0302113	0.979277	0.108666	0.897844	-0.138983	0.908159	0.124534	0.850526	-0.108772	0.927377	0.500711	0.864087	-0.104004	0.930447	0.189401	1	-0.110611	0.926196	0.0312682	0.743819	-0.222561	0.857043	0.122441	0.950386	-0.11195	0.925337	0.208596	0.886481	-0.104158	0.930348	0.34929	1	-0.112104	0.925237	32.9166	32.6513	32.799	32.8346	32.817	32.7191	32.836	32.9558	32.8249	32.7542	32.9899
Q9WTT4	V-type proton ATPase subunit G 2	Atp6v1g2	0.336087	0.93945	-0.0481554	0.967172	0.912969	0.992577	0.0134657	1.00938	0.565014	0.944151	0.0616211	1.04364	0.919272	0.986583	-0.0104637	0.992773	0.253247	1	-0.0574633	0.960952	0.752304	0.981684	0.0522143	1.03686	0.519319	0.976736	0.109678	1.07899	0.201345	0.935598	0.0699272	1.04966	0.427229	1	0.190069	1.14082	33.0471	32.845	32.9096	32.9394	33.0336	33.0171	32.983	32.89	32.9934	33.1268	32.9449
P14231	Sodium/potassium-transporting ATPase subunit beta-2	Atp1b2	0.52237	0.938307	-0.0576286	0.960842	0.331209	0.951439	-0.0785683	0.946997	0.828579	0.979369	-0.0209396	0.985591	0.302771	0.907501	0.0500336	1.03529	0.442388	1	-0.11016	0.926486	0.0770742	0.831513	-0.178415	0.883674	0.651604	0.979892	-0.0682551	0.953791	0.653015	0.962311	-0.0799052	0.94612	0.108304	1	-0.198194	0.871641	32.9176	32.7645	32.8911	32.8504	32.8861	32.845	32.9967	33.1297	32.71	32.8456	32.7855
P61922	4-aminobutyrate aminotransferase, mitochondrial	Abat	0.721198	0.975878	0.0150707	1.0105	0.294127	0.942618	-0.0932041	0.937438	0.210334	0.871864	-0.108275	0.927697	0.621467	0.9589	-0.0283527	0.980539	0.665548	0.998605	0.0292829	1.0205	0.33854	0.904955	-0.132273	0.912393	0.295792	0.929062	-0.161556	0.89406	0.690494	0.985984	0.0343367	1.02409	0.578537	1	-0.0988668	0.933766	32.9026	32.8692	32.9335	32.9108	32.9248	32.8943	32.8222	32.9949	32.8085	32.8913	32.9845
Q6PH08	ERC protein 2	Erc2	0.0525093	0.692236	0.27855	1.21298	0.440732	0.91598	0.167128	1.12282	0.587738	0.915853	-0.111422	0.925675	0.245148	0.595424	-0.434504	0.739948	0.354907	1	0.16074	1.11786	0.354006	0.85704	0.264706	1.20139	0.72497	0.981176	0.103966	1.07472	0.322283	0.826754	-0.215292	0.861372	0.440548	1	0.323177	1.25108	33.2302	33.2047	33.1518	32.9538	32.8065	32.6483	33.1568	32.6976	32.9737	32.9069	33.4169
Q9JKC6	Cell cycle exit and neuronal differentiation protein 1	Cend1	0.901779	0.983144	0.0173557	1.0121	0.500121	0.939317	-0.129234	0.914317	0.352189	0.846025	-0.14659	0.903383	0.997829	0.998816	-0.000482559	0.999666	0.844858	0.994126	-0.0372696	0.974498	0.336658	0.835303	-0.281264	0.82287	0.359724	0.913078	-0.243994	0.844404	0.88076	0.990092	0.0279153	1.01954	0.494664	1	-0.215597	0.86119	33.1112	32.5561	32.9993	32.9888	33.0582	32.7683	32.7604	33.0892	32.8064	32.9745	32.853
P62631	Elongation factor 1-alpha 2	Eef1a2	0.549583	0.948883	-0.0336624	0.976937	0.758143	0.995467	0.0212769	1.01486	0.381608	0.940414	0.0549393	1.03882	0.366511	0.887286	0.0709667	1.05042	0.736005	0.999844	-0.0307973	0.978879	0.899856	0.992678	0.013457	1.00937	0.685079	0.996425	0.0442543	1.03115	0.957556	1	-0.00463422	0.996793	0.799685	1	-0.0313466	0.978507	32.7668	32.8954	32.7702	32.6915	32.8316	32.7922	32.9287	32.7187	32.8021	32.6829	32.7989
Q8BPN8	DmX-like protein 2	Dmxl2	0.414323	0.939277	0.0483212	1.03406	0.737544	0.992169	-0.0170414	0.988257	0.311382	0.925575	-0.0653625	0.955705	0.0422191	0.760416	-0.112415	0.925038	0.361779	1	0.0845172	1.06033	0.283731	0.96219	0.0505231	1.03564	0.69852	0.999038	-0.033994	0.976713	0.538968	0.956448	0.069479	1.04934	0.0270336	1	0.1479	1.10796	32.8895	32.9073	32.9804	32.8816	32.9315	32.8846	32.9334	32.6869	32.8955	33.016	33.025
O89053	Coronin-1A	Coro1a	0.965561	0.995647	0.00205421	1.00142	0.74076	0.985873	0.040369	1.02838	0.732727	0.962982	0.0383148	1.02691	0.486847	0.874096	-0.093256	0.937405	0.844532	0.997532	-0.0146497	0.989897	0.490135	0.919338	0.111379	1.08026	0.474302	0.969884	0.126029	1.09129	0.993041	1	-0.000816981	0.999434	0.363842	1	0.218468	1.1635	32.8976	32.8115	32.8749	32.8097	32.8376	32.8542	32.9173	32.7134	32.9094	32.8292	33.0491
Q99JY9	Actin-related protein 3	Actr3	0.541639	0.95218	-0.0393553	0.97309	0.451707	0.927739	0.130698	1.09482	0.287071	0.821564	0.170053	1.1251	0.773557	0.959507	-0.034565	0.976326	0.937233	0.998771	-0.00737635	0.9949	0.197058	0.790953	0.299089	1.23037	0.203383	0.886525	0.306465	1.23667	0.716888	0.985328	0.0421365	1.02964	0.22375	1	0.383167	1.3042	32.8695	32.9403	33.0063	32.8434	32.9195	33.0395	33.0673	32.8103	32.9346	32.9277	33.1004
P31786	Acyl-CoA-binding protein	Dbi	0.4737	0.932061	-0.0622658	0.957759	0.193873	0.899063	0.157469	1.11533	0.0382971	0.703512	0.219735	1.16452	0.0279979	0.467908	0.277794	1.21234	0.896899	0.995811	0.0147641	1.01029	0.283809	0.874895	0.195793	1.14535	0.311231	0.912801	0.181029	1.13369	0.542744	0.962202	0.0653356	1.04633	0.873397	1	-0.0314293	0.97845	32.9336	33.1518	32.9959	33.2639	33.1746	33.2009	32.9755	33.191	33.2008	32.9556	32.8643
G5E8G3	Opioid-binding protein/cell adhesion molecule-like	Opcml	0.252265	0.804761	0.188822	1.13983	0.679254	0.965961	-0.110479	0.926281	0.279023	0.763409	-0.2993	0.812646	0.388851	0.680418	-0.475153	0.719391	0.749287	1	0.0551783	1.03899	0.719802	0.958583	-0.126887	0.915805	0.637429	0.976647	-0.182065	0.88144	0.167321	0.675629	-0.380432	0.768207	0.878156	1	-0.0873445	0.941254	32.5556	32.7152	32.6548	32.5193	32.0877	32.3006	32.7973	32.2882	32.6382	32.2474	33.0912
O08539	Myc box-dependent-interacting protein 1	Bin1	0.626534	0.969676	0.0174314	1.01216	0.604025	0.993049	-0.0175554	0.987905	0.311949	0.956536	-0.0349869	0.976041	0.16232	0.893515	-0.0547104	0.962788	0.762054	0.999641	0.0164019	1.01143	0.902154	0.995023	-0.00543594	0.996239	0.685285	1	-0.0218379	0.984977	0.682896	0.991403	0.0246512	1.01723	0.238864	1	0.0575237	1.04068	32.8733	32.8119	32.8879	32.7893	32.8186	32.8573	32.8271	32.8762	32.7366	32.9089	32.8764
P68404	Protein kinase C beta type	Prkcb	0.117924	0.813829	-0.133649	0.911523	0.170922	0.901418	-0.13105	0.913167	0.974811	0.995111	0.00259933	1.0018	0.731889	0.945348	0.04175	1.02936	0.380051	1	-0.078448	0.947076	0.468973	0.924039	-0.101949	0.931773	0.829529	1	-0.0235011	0.983842	0.113143	0.81225	0.160956	1.11803	0.531562	1	0.095705	1.06859	32.8509	32.6588	32.9027	32.881	32.9603	33.1468	32.8711	32.8826	32.9241	33.0624	32.9612
Q8K310	Matrin-3	Matr3	0.288596	0.824566	0.1482	1.10819	0.402528	0.976934	-0.0436106	0.970224	0.148629	0.78592	-0.191811	0.875506	0.106338	0.469044	-0.365662	0.776113	0.681598	1	-0.0190366	0.986892	0.12957	0.910525	-0.0949465	0.936307	0.235707	0.975948	-0.0759099	0.948744	0.0275716	0.701964	-0.423374	0.745679	0.100411	1	-0.133622	0.91154	32.759	32.8183	32.7305	32.7537	32.4913	32.235	32.738	32.7691	32.8525	32.7079	32.7497
Q60864	Stress-induced-phosphoprotein 1	Stip1	0.44143	0.938555	-0.0471884	0.967821	0.555419	0.986343	-0.0303091	0.97921	0.60985	0.978381	0.0168793	1.01177	0.134127	0.912674	0.0429993	1.03025	0.514096	1	-0.0529861	0.963939	0.438465	0.964709	-0.0535202	0.963582	0.991494	1	-0.000534058	0.99963	0.321809	0.950889	0.0681025	1.04834	0.37409	1	0.0245692	1.01718	32.9249	32.9094	32.7569	32.7118	32.9283	32.8993	32.8712	32.9055	32.7604	32.8807	32.8609
Q99LC3	NADH dehydrogenase [ubiquinone] 1 alpha subcomplex subunit 10, mitochondrial	Ndufa10	0.0875268	0.825386	0.114987	1.08296	0.253553	0.90107	-0.145919	0.903804	0.0444094	0.661637	-0.260905	0.834564	0.0335351	0.646948	-0.191469	0.875713	0.305233	1	0.106138	1.07634	0.329126	0.888581	-0.201059	0.869912	0.185013	0.881049	-0.307196	0.808211	0.997631	0.999894	0.000335693	1.00023	0.645743	1	-0.115391	0.923132	32.8822	32.9307	32.7768	32.8314	32.774	32.7069	32.5997	32.7503	32.8704	32.9449	32.919
Q9JIS5	Synaptic vesicle glycoprotein 2A	Sv2a	0.0736668	0.839096	0.0932985	1.06681	0.408944	0.977377	-0.0431967	0.970502	0.0341495	0.802824	-0.136495	0.909727	0.407523	0.898034	-0.0583477	0.960363	0.269041	1	0.0847371	1.06049	0.0959869	0.906321	-0.103856	0.930542	0.0730923	0.889912	-0.188594	0.877461	0.797974	0.989624	0.0230687	1.01612	0.230283	1	-0.107177	0.928403	32.8458	32.794	32.7888	32.7411	32.715	32.711	32.8126	32.5977	32.6594	32.7153	32.8274
Q8QZT1	Acetyl-CoA acetyltransferase, mitochondrial	Acat1	0.558937	0.959219	0.024206	1.01692	0.0321596	0.921505	0.0872324	1.06233	0.122214	0.922624	0.0630264	1.04465	0.282533	0.816438	0.113472	1.08183	0.505994	1	0.0344098	1.02414	0.198684	0.942978	0.0638059	1.04522	0.515493	0.999288	0.0293961	1.02058	0.580352	0.983446	0.0400937	1.02818	0.397745	1	-0.0439822	0.969974	32.9391	32.8937	32.9816	32.8721	32.9868	32.8561	32.9096	32.9193	32.8152	32.7656	32.8504
P58252	Elongation factor 2	Eef2	0.17764	0.938721	0.043977	1.03095	0.0289584	0.891289	0.129742	1.0941	0.0679572	0.884229	0.0857651	1.06125	0.391617	0.963981	-0.0218163	0.984992	0.0352248	1	0.0469348	1.03307	0.00598183	0.729912	0.204421	1.15222	0.0187228	0.892752	0.157486	1.11534	0.103706	0.952721	-0.0555592	0.962221	0.0887261	1	0.123743	1.08956	32.8424	32.9431	32.9416	32.9448	32.8215	32.8598	32.9239	32.8923	32.8725	32.8688	32.8562
Q9WUM4	Coronin-1C	Coro1c	0.111483	0.801079	0.156257	1.11439	0.556609	0.96983	0.0575964	1.04073	0.245359	0.884435	-0.0986603	0.9339	0.386477	0.803649	-0.141809	0.906382	0.429073	1	0.114501	1.0826	0.736883	0.98595	0.0446065	1.0314	0.593605	0.98123	-0.0698942	0.952708	0.800294	0.991624	-0.0326316	0.977635	0.79718	1	0.0392838	1.0276	32.8218	32.6444	32.5844	32.8921	32.5882	32.5315	32.5152	32.4903	32.772	32.5757	32.8276
Q5DU25	IQ motif and SEC7 domain-containing protein 2	Iqsec2	0.0342008	0.656796	0.281008	1.21504	0.502885	0.917165	0.194985	1.14471	0.742012	0.949522	-0.0860226	0.942117	0.111665	0.382734	-0.495279	0.709424	0.246675	1	0.137245	1.0998	0.459527	0.878017	0.32406	1.25185	0.659211	0.979625	0.186815	1.13825	0.0313734	0.670319	-0.303653	0.810198	0.518508	1	0.378441	1.29994	32.9635	32.8954	33.0024	32.7251	32.4451	32.4217	32.6497	32.7069	32.8546	32.748	33.1093
Q61548	Clathrin coat assembly protein AP180	Snap91	0.711624	0.963336	0.0232759	1.01626	0.665739	0.980484	-0.0479979	0.967278	0.490768	0.930008	-0.0712738	0.951797	0.162313	0.701865	-0.206417	0.866687	0.976266	1	-0.00246429	0.998293	0.920951	0.992435	0.0163574	1.0114	0.908537	1	0.0188217	1.01313	0.506251	0.954484	-0.0706266	0.952224	0.473047	1	0.154612	1.11312	32.5675	32.5932	32.6664	32.4729	32.4245	32.5942	32.6865	32.5386	32.5149	32.6727	32.7588
Q64523;Q6GSS7	Histone H2A type 2-C;Histone H2A type 2-A	H2ac20;Hist2h2aa1	0.177105	0.698391	0.3886	1.30912	0.136852	0.741867	-0.398741	0.75852	0.0264809	0.38848	-0.787341	0.579411	0.193318	0.430708	-0.641443	0.641071	0.463686	0.998617	0.332067	1.25882	0.140811	0.591153	-0.552539	0.681819	0.139361	0.698994	-0.884606	0.541635	0.984681	1	-0.0105623	0.992706	0.600566	1	-0.253725	0.838728	31.8635	31.5375	31.8929	31.5326	31.3059	31.3174	30.55	31.5861	31.8307	32.2854	31.6209
P38647	Stress-70 protein, mitochondrial	Hspa9	0.845903	0.98845	-0.00887489	0.993867	0.465616	0.978976	0.0410236	1.02884	0.122355	0.937484	0.0498985	1.03519	0.118869	0.828928	0.0906067	1.06482	0.328538	1	-0.0476468	0.967513	0.67598	0.990553	-0.0248871	0.982898	0.588468	1	0.0227598	1.0159	0.951959	0.999803	0.001297	1.0009	0.295045	1	-0.0665499	0.954919	32.9142	32.6903	32.8322	32.7486	32.823	32.789	32.8214	32.8109	32.7818	32.6855	32.7453
P28184	Metallothionein-3	Mt3	0.647121	0.916919	-0.112784	0.924802	0.878382	0.989058	0.070863	1.05034	0.671573	0.909641	0.183647	1.13575	0.672416	0.816608	0.508605	1.42267	0.453046	0.99813	-0.285397	0.820516	0.15337	0.748138	-0.318389	0.801965	0.924827	1	-0.032992	0.977391	0.66918	0.930181	-0.189582	0.87686	0.420323	1	-0.731179	0.602412	32.9089	32.2375	32.7264	32.6013	32.641	32.5941	33.1838	33.0471	32.1904	33.146	31.072
P19157;P46425	Glutathione S-transferase P 1;Glutathione S-transferase P 2	Gstp1;Gstp2	0.518397	0.951897	-0.0304974	0.979083	0.823375	0.994035	0.0129147	1.00899	0.449255	0.950036	0.043412	1.03055	0.0668116	0.803703	0.0976105	1.07	0.907499	0.998569	-0.00839996	0.994195	0.990187	0.998442	-0.00112025	0.999224	0.942001	0.997753	0.00727971	1.00506	0.661729	0.985597	0.035806	1.02513	0.617465	1	-0.0545247	0.962912	32.7113	32.6762	32.7386	32.8125	32.8129	32.7604	32.6446	32.8307	32.7772	32.6848	32.6933
Q810U3	Neurofascin	Nfasc	0.0648641	0.835288	-0.0990807	0.933628	0.00224512	0.817529	-0.202219	0.869212	0.0259489	0.844236	-0.103139	0.931005	0.496975	0.935262	-0.0384483	0.973702	0.18342	1	-0.0907974	0.939004	0.0187478	0.702578	-0.237063	0.848471	0.0516481	0.910978	-0.146266	0.903586	0.331909	0.953997	0.0635694	1.04505	0.472386	1	-0.0442479	0.969795	32.6165	32.6156	32.5677	32.4606	32.749	32.6557	32.597	32.704	32.6153	32.7388	32.7428
Q9CPQ1	Cytochrome c oxidase subunit 6C	Cox6c	0.121901	0.836984	0.110474	1.07958	0.946797	0.996688	0.00746002	1.00518	0.245607	0.880632	-0.103014	0.931086	0.0902473	0.677386	-0.199909	0.870605	0.432463	1	0.0793699	1.05656	0.794798	0.992326	0.0409533	1.02879	0.776215	1	-0.0384165	0.973723	0.992703	1	-0.000460943	0.999681	0.397456	1	0.161032	1.11809	32.868	32.5768	32.8309	32.8253	32.6562	32.6728	32.6754	32.7208	32.5987	32.8004	32.9284
P06837	Neuromodulin	Gap43	0.409196	0.836798	0.144936	1.10568	0.326654	0.889829	-0.219437	0.858901	0.0425815	0.595779	-0.364372	0.776807	0.49443	0.879685	-0.0878601	0.940917	0.658053	1	0.0528437	1.03731	0.0789335	0.549241	-0.49587	0.709134	0.0691986	0.690813	-0.548714	0.683629	0.331549	0.854515	0.163463	1.11997	0.33903	1	-0.297391	0.813723	33.2227	32.4764	32.6186	32.6835	32.8058	32.6011	32.3787	32.6984	32.5429	32.8191	32.7635
D3Z7P3	Glutaminase kidney isoform, mitochondrial	Gls	0.336189	0.906002	0.0740059	1.05264	0.134755	0.901528	0.129788	1.09413	0.519476	0.946426	0.0557823	1.03942	0.853364	0.964671	0.0343132	1.02407	0.421765	1	0.100391	1.07206	0.0760619	0.826636	0.170486	1.12544	0.572535	0.978268	0.0700951	1.04979	0.858371	0.989243	0.0254739	1.01781	0.69003	1	0.0612558	1.04337	32.7374	32.8642	32.8355	32.7066	32.7138	32.7407	32.8381	32.5039	32.7633	32.5298	32.856
Q9R0K7	Plasma membrane calcium-transporting ATPase 2	Atp2b2	0.7807	0.963022	0.0244928	1.01712	0.0156119	0.904476	-0.113315	0.924462	0.120356	0.82532	-0.137807	0.908899	0.0912057	0.66315	-0.209347	0.864929	0.69023	1	-0.0465368	0.968258	0.0326335	0.870541	-0.136651	0.909628	0.468255	0.978929	-0.0901146	0.939448	0.304059	0.848243	-0.174905	0.885826	0.427373	1	-0.0556723	0.962146	32.6535	32.6922	32.625	32.6305	32.476	32.5658	32.6509	32.8984	32.5381	32.6792	32.7812
P62897	Cytochrome c, somatic	Cycs	0.205168	0.835758	-0.118325	0.921257	0.015987	0.854596	-0.184184	0.880147	0.353263	0.925074	-0.0658592	0.955376	0.0714767	0.9572	-0.0247307	0.983004	0.377602	1	-0.13437	0.911067	0.0509241	0.761912	-0.227648	0.854026	0.454224	0.976216	-0.0932782	0.93739	0.840922	0.988053	-0.0311101	0.978667	0.0477156	1	-0.0996577	0.933254	32.538	32.6534	32.3807	32.5368	32.6339	32.6199	32.8359	32.6816	32.4566	32.6516	32.6516
Q99LX0	Parkinson disease protein 7 homolog	Park7	0.0209836	0.835463	-0.0936197	0.937168	0.88909	0.995227	0.00480022	1.00333	0.0212602	0.846895	0.09842	1.0706	0.601033	0.973428	0.0163975	1.01143	0.0528879	1	-0.118052	0.921431	0.382336	0.979654	0.0350494	1.02459	0.0212732	0.896048	0.153102	1.11196	0.353931	0.963423	-0.051267	0.965088	0.0811504	1	0.0854371	1.06101	32.7311	32.7394	32.6621	32.7447	32.8033	32.7611	32.7828	32.819	32.8986	32.7495	32.782
Q91V61	Sideroflexin-3	Sfxn3	0.755615	0.958614	0.0290348	1.02033	0.468527	0.955876	-0.0826077	0.944349	0.264544	0.874564	-0.111642	0.925534	0.295014	0.809847	0.119822	1.0866	0.33884	1	0.121118	1.08758	0.370756	0.906691	-0.144834	0.904484	0.0684269	0.866683	-0.265952	0.83165	0.0313734	0.721995	0.201656	1.15002	0.288499	1	-0.184117	0.880188	32.4503	32.2898	32.5767	32.6215	32.5715	32.5815	32.2936	32.4118	32.4192	32.3716	32.5418
Q9R0Q6	Actin-related protein 2/3 complex subunit 1A	Arpc1a	0.486839	0.947439	-0.0418034	0.97144	0.653067	0.969968	0.0870445	1.06219	0.457347	0.885061	0.128848	1.09342	0.207956	0.741232	-0.159595	0.895276	0.443214	1	-0.0663198	0.955071	0.310067	0.843136	0.254824	1.19319	0.216268	0.886566	0.321143	1.24932	0.735999	0.98906	-0.0330289	0.977366	0.203059	1	0.44771	1.36387	32.7065	32.5586	32.752	32.6733	32.6201	32.7691	32.8237	32.6362	32.723	32.8991	32.8093
P97300	Neuroplastin	Nptn	0.61477	0.952738	-0.0402489	0.972487	0.558145	0.970085	-0.0594772	0.959612	0.758209	0.978089	-0.0192284	0.98676	0.166889	0.765809	-0.128906	0.914525	0.294249	1	-0.103442	0.93081	0.623629	0.974879	-0.0495516	0.966237	0.461228	0.978038	0.0538902	1.03806	0.971475	1	-0.00194867	0.99865	0.116193	1	0.180848	1.13355	32.892	32.5039	32.7677	32.6554	32.7445	32.7431	32.816	32.6817	32.7396	32.9332	32.8122
P56564	Excitatory amino acid transporter 1	Slc1a3	0.284145	0.85519	0.101717	1.07305	0.0945635	0.883464	0.17954	1.13252	0.3945	0.922399	0.0778229	1.05542	0.871686	0.973162	-0.0282288	0.980623	0.802973	0.998354	0.0328471	1.02303	0.130274	0.83566	0.181371	1.13396	0.273671	0.93366	0.148524	1.10843	0.634805	0.963239	-0.0690104	0.953292	0.490796	1	0.107742	1.07754	33.1533	32.9409	33.131	32.8929	32.921	32.8518	32.9653	33.1226	32.7784	32.7643	33.065
O08709	Peroxiredoxin-6	Prdx6	0.67658	0.959496	-0.0270927	0.981396	3.76297e-05	0.549745	0.295122	1.22699	0.000715482	0.505702	0.322215	1.25025	0.0186601	0.38528	0.319349	1.24777	0.876631	0.995795	0.0151609	1.01056	0.000121581	0.520831	0.339286	1.26513	0.0261422	0.800844	0.324125	1.2519	0.547354	0.954529	0.0805492	1.05742	0.125875	1	0.0853246	1.06093	32.955	33.0053	32.9964	32.9836	33.039	33.082	32.9512	33.1507	32.838	32.7798	32.7025
Q61361	Brevican core protein	Bcan	0.96008	0.993691	0.00290298	1.00201	0.472026	0.96814	0.0524872	1.03705	0.470575	0.950825	0.0495842	1.03497	0.579083	0.957259	0.028223	1.01976	0.508501	1	0.0490545	1.03459	0.258303	0.910145	0.112879	1.08138	0.447603	0.976534	0.063825	1.04523	0.129229	0.857493	0.12174	1.08805	0.160563	1	0.157342	1.11523	32.7301	32.6113	32.754	32.7944	32.8339	32.7514	32.6185	32.7463	32.6478	32.7522	32.7766
Q9WUA3	ATP-dependent 6-phosphofructokinase, platelet type	Pfkp	0.531739	0.957389	0.027247	1.01907	0.387966	0.970843	0.0527033	1.03721	0.666754	0.975194	0.0254562	1.0178	0.802496	0.973598	0.0222282	1.01553	0.0387772	1	0.0910823	1.06517	0.110379	0.898912	0.11869	1.08575	0.674807	1	0.0276082	1.01932	0.0726931	0.861599	0.10964	1.07896	0.288139	1	0.11502	1.08299	32.66	32.7637	32.7477	32.7084	32.7264	32.7906	32.6108	32.6964	32.6393	32.6651	32.8074
P62137	Serine/threonine-protein phosphatase PP1-alpha catalytic subunit	Ppp1ca	0.496533	0.951664	-0.0303749	0.979166	0.835924	0.991592	0.0194992	1.01361	0.548874	0.948909	0.0498741	1.03517	0.94358	0.990816	0.00411606	1.00286	0.700255	0.998044	0.0167821	1.0117	0.493629	0.932332	0.0971616	1.06967	0.571186	0.977637	0.0803795	1.0573	0.489599	0.974949	0.0437508	1.03079	0.516166	1	0.120014	1.08675	32.5342	32.6086	32.6532	32.6967	32.7307	32.6289	32.6888	32.5796	32.6398	32.6833	32.668
Q8K1M6	Dynamin-1-like protein	Dnm1l	0.289419	0.935757	0.0516148	1.03642	0.199151	0.953868	0.0672436	1.04771	0.789107	0.9837	0.0156288	1.01089	0.80796	0.968723	0.0255146	1.01784	0.206244	1	0.0920703	1.0659	0.0990077	0.90396	0.101109	1.0726	0.911909	0.997593	0.00903829	1.00628	0.406864	0.945085	0.0770632	1.05487	0.549565	1	0.0605869	1.04289	32.8073	32.858	32.8408	32.8387	32.8523	32.8094	32.871	32.723	32.6673	32.7156	32.895
Q9D0M3	Cytochrome c1, heme protein, mitochondrial	Cyc1	0.927279	0.988053	0.00527306	1.00366	0.232025	0.950884	-0.0722378	0.951161	0.290603	0.911109	-0.0775108	0.947691	0.947596	0.990355	-0.0086174	0.994045	0.730012	0.99813	0.0286026	1.02002	0.215733	0.911141	-0.0948372	0.936378	0.281014	0.958456	-0.12344	0.917996	0.6481	0.972012	0.0556552	1.03933	0.623007	1	-0.0591672	0.959818	32.6487	32.6311	32.6742	32.6535	32.7463	32.6138	32.5674	32.5303	32.7754	32.5933	32.784
Q99PT1	Rho GDP-dissociation inhibitor 1	Arhgdia	0.624399	0.95839	-0.024754	0.982988	0.534013	0.980363	0.040453	1.02844	0.260436	0.924827	0.0652069	1.04623	0.558935	0.897865	0.0661926	1.04695	0.527751	1	-0.0337919	0.976849	0.621676	0.992874	0.0307579	1.02155	0.403151	0.979201	0.0645498	1.04576	0.312	0.949277	0.0690899	1.04905	0.543654	1	0.067447	1.04786	32.7738	32.5922	32.6225	32.6667	32.722	32.7381	32.6195	32.7487	32.6146	32.7587	32.5689
P40124	Adenylyl cyclase-associated protein 1	Cap1	0.89195	0.98682	-0.00903988	0.993754	0.0622431	0.892128	0.144158	1.10509	0.0570528	0.787546	0.153198	1.11203	0.898912	0.983325	-0.0176334	0.987852	0.481446	1	-0.0435308	0.970277	0.0299873	0.750156	0.223555	1.16761	0.00500256	0.788837	0.267086	1.20337	0.334917	0.897719	-0.10883	0.92734	0.0517714	1	0.175889	1.12966	32.7279	32.691	32.8654	32.7357	32.5763	32.8211	32.8374	32.7684	32.8168	32.7252	32.7075
P19536	Cytochrome c oxidase subunit 5B, mitochondrial	Cox5b	0.979631	0.996928	0.00138645	1.00096	0.993848	0.999109	-0.0005476	0.999621	0.974955	0.997034	-0.00193405	0.99866	0.936119	0.985841	-0.0117207	0.991909	0.710941	0.998304	-0.0304451	0.979118	0.760668	0.989397	-0.0258547	0.982238	0.955498	0.999792	0.00459035	1.00319	0.660182	0.98509	-0.0352974	0.975831	0.882714	1	-0.0189864	0.986926	32.7562	32.5773	32.7614	32.7174	32.6462	32.7148	32.7608	32.7757	32.6109	32.5674	32.8171
Q8BIZ1	Ankyrin repeat and sterile alpha motif domain-containing protein 1B	Anks1b	0.00664496	0.705624	0.21175	1.15809	0.414287	0.904977	0.219882	1.16464	0.971656	0.992664	0.00813141	1.00565	0.352006	0.729051	-0.226082	0.854954	0.0665821	0.950196	0.196365	1.14581	0.373277	0.831184	0.360639	1.28399	0.666935	0.97693	0.164274	1.1206	0.727545	0.990828	-0.0254243	0.982532	0.497118	1	0.364931	1.28782	32.7293	32.6736	32.8468	32.6048	32.5575	32.4157	32.5482	32.4499	32.538	32.5387	32.8867
Q8R0S2	IQ motif and SEC7 domain-containing protein 1	Iqsec1	0.0223836	0.571746	0.457866	1.37351	0.559468	0.95265	0.102305	1.07349	0.0912992	0.624175	-0.355561	0.781565	0.15996	0.391221	-0.667548	0.629576	0.173204	0.95618	0.247665	1.18728	0.635774	0.948931	0.100095	1.07184	0.522999	0.970553	-0.14757	0.90277	0.0748469	0.704697	-0.432468	0.740993	0.799873	1	0.0875098	1.06253	32.8566	32.6877	32.8721	32.5634	31.9665	32.0887	32.2468	32.4724	32.6611	32.3965	32.9938
P15532	Nucleoside diphosphate kinase A	Nme1	0.15581	0.861098	0.0882929	1.06311	0.665783	0.985256	0.0387156	1.0272	0.547807	0.947426	-0.0495773	0.966219	0.185521	0.864067	-0.0752563	0.949173	0.599435	1	0.0427945	1.03011	0.941786	0.997157	0.0103366	1.00719	0.829242	1	-0.032458	0.977753	0.621821	0.978353	-0.0469131	0.968005	0.98146	1	-0.00411479	0.997152	32.8156	32.6716	32.7916	32.6628	32.5811	32.6568	32.6591	32.7776	32.561	32.6921	32.6964
Q61171	Peroxiredoxin-2	Prdx2	0.811998	0.964746	-0.0248051	0.982953	0.958163	0.995567	-0.00562019	0.996112	0.841832	0.98245	0.0191849	1.01339	0.0952517	0.645232	0.241644	1.18234	0.449063	1	0.0974528	1.06988	0.792525	0.991766	-0.0316683	0.978288	0.318783	0.958378	-0.129121	0.914388	0.232095	0.832877	0.170657	1.12557	0.165351	1	-0.200108	0.870485	32.3783	32.7573	32.5198	32.5059	32.6134	32.7216	32.4353	32.3945	32.6608	32.3664	32.4854
P58281	Dynamin-like 120 kDa protein, mitochondrial	Opa1	0.383394	0.939118	-0.0522774	0.964413	0.135993	0.918715	-0.102775	0.93124	0.501204	0.949507	-0.0504974	0.965603	0.0397308	0.810168	0.0926819	1.06635	0.501479	0.999432	0.0247421	1.0173	0.272412	0.904946	-0.121208	0.919417	0.209018	0.928214	-0.14595	0.903784	0.0168582	0.731949	0.186369	1.1379	0.694394	1	-0.0522633	0.964422	32.5381	32.5169	32.5459	32.5811	32.7279	32.6913	32.5174	32.478	32.5742	32.6221	32.6117
P97807	Fumarate hydratase, mitochondrial	Fh	0.427262	0.939535	0.0491377	1.03465	0.923536	0.996741	0.00651913	1.00453	0.516001	0.952297	-0.0426186	0.970891	0.858038	0.981291	0.0159912	1.01115	0.663005	1	0.0430578	1.0303	0.657564	0.985112	-0.038634	0.973576	0.415997	0.982206	-0.0816917	0.944949	0.836016	0.990615	-0.0212199	0.985399	0.279244	1	-0.118903	0.920888	32.6026	32.6858	32.6538	32.497	32.5174	32.5785	32.6693	32.6056	32.4326	32.4593	32.6046
P48678	Prelamin-A/C	Lmna	0.366149	0.841419	0.126442	1.0916	0.984302	0.998569	-0.00396614	0.997255	0.424545	0.879268	-0.130408	0.913573	0.531906	0.862468	0.111646	1.08046	0.665625	1	0.0899398	1.06433	0.416179	0.898948	-0.201838	0.869442	0.136133	0.876983	-0.291778	0.816895	0.608133	0.956635	-0.0803591	0.945822	0.0773232	1	-0.483783	0.7151	32.2381	32.0599	32.0287	32.5734	31.9187	32.1821	31.9795	32.2408	32.1719	31.869	32.0084
P63085	Mitogen-activated protein kinase 1	Mapk1	0.0854653	0.825086	0.115782	1.08356	0.0342244	0.890372	0.135378	1.09838	0.750958	0.977737	0.0195953	1.01368	0.64387	0.93111	-0.0481148	0.967199	0.267863	1	0.113584	1.08191	0.032121	0.809172	0.178319	1.13156	0.487279	0.975876	0.0647354	1.04589	0.910824	1	-0.012942	0.991069	0.255396	1	0.0999082	1.07171	32.6846	32.7674	32.703	32.6192	32.5203	32.6198	32.6165	32.4357	32.6967	32.544	32.6922
Q6R891	Neurabin-2	Ppp1r9b	0.142439	0.706097	0.336738	1.2629	0.860438	0.993123	0.0339242	1.02379	0.129413	0.69602	-0.302814	0.81067	0.249472	0.6294	-0.393385	0.761341	0.58161	1	0.172676	1.12715	0.795857	0.980523	-0.0697575	0.952798	0.389585	0.911155	-0.242434	0.845318	0.337423	0.784196	-0.307092	0.808269	0.586302	1	-0.156141	0.897422	32.382	32.1412	31.907	32.6029	31.8192	31.6554	32.0035	31.7142	32.4154	31.8998	32.3615
Q9Z1B3	1-phosphatidylinositol 4,5-bisphosphate phosphodiesterase beta-1	Plcb1	0.804698	0.986964	-0.00930481	0.993571	0.0614911	0.901371	-0.116064	0.922702	0.046874	0.84392	-0.106759	0.928672	0.0690081	0.697165	-0.180317	0.882509	0.935157	0.99706	0.00485102	1.00337	0.350846	0.963011	-0.0528692	0.964017	0.308781	0.976374	-0.0577202	0.960781	0.841599	1	0.0112235	1.00781	0.0862915	1	0.13382	1.0972	32.4018	32.4717	32.4886	32.3611	32.4594	32.4343	32.5124	32.4112	32.3831	32.5788	32.6755
P21279	Guanine nucleotide-binding protein G(q) subunit alpha	Gnaq	0.578168	0.959106	0.0255241	1.01785	0.577883	0.973027	0.0520782	1.03676	0.751087	0.974906	0.0265541	1.01858	0.116551	0.722854	-0.155558	0.897785	0.806133	0.999757	0.0175006	1.0122	0.0549899	0.827763	0.165462	1.12153	0.0904412	0.910909	0.147962	1.108	0.802302	0.989459	-0.0192801	0.986725	0.0227146	1	0.284239	1.21777	32.6214	32.558	32.7045	32.5981	32.5471	32.6197	32.7026	32.5649	32.5405	32.6933	32.7846
Q61553	Fascin	Fscn1	0.649865	0.95739	-0.0308733	0.978828	0.0368536	0.87382	-0.188529	0.8775	0.0497647	0.788751	-0.157656	0.89648	0.924003	0.99141	-0.00577164	0.996007	0.905298	0.999666	0.0106913	1.00744	0.0665809	0.745449	-0.248221	0.841934	0.0456031	0.856948	-0.258912	0.835718	0.141434	0.85316	0.133788	1.09717	0.331002	1	-0.119353	0.9206	32.4632	32.283	32.4738	32.4894	32.5337	32.5432	32.3522	32.509	32.3528	32.5976	32.4909
Q9Z2Y3	Homer protein homolog 1	Homer1	0.0531539	0.760321	0.206692	1.15404	0.744254	0.971875	0.0819366	1.05844	0.587764	0.909642	-0.124755	0.917159	0.324499	0.677732	-0.356911	0.780835	0.248764	1	0.130408	1.0946	0.652563	0.927019	0.160423	1.11761	0.93438	1	0.0300147	1.02102	0.644001	0.958345	-0.0803337	0.945839	0.554034	1	0.306592	1.23678	32.784	32.5815	32.6546	32.586	32.5306	32.2627	32.6127	32.2971	32.5211	32.5128	32.9943
Q11011	Puromycin-sensitive aminopeptidase	Npepps	0.918205	0.994994	-0.00201473	0.998604	0.331121	0.986234	0.0290102	1.02031	0.229012	0.958413	0.0310249	1.02174	0.544076	0.963523	0.0213108	1.01488	0.591247	0.999388	0.0145098	1.01011	0.233435	0.962149	0.0520109	1.03671	0.320464	0.993181	0.037501	1.02633	0.297067	0.986652	0.0266018	1.01861	0.394203	1	0.042792	1.03011	32.5041	32.4972	32.5685	32.5172	32.5226	32.5569	32.5089	32.493	32.5375	32.4945	32.5423
P26883	Peptidyl-prolyl cis-trans isomerase FKBP1A	Fkbp1a	0.782385	0.963553	-0.0259714	0.982159	0.104003	0.882262	0.189257	1.14018	0.0367954	0.709197	0.215228	1.16089	0.53392	0.851386	0.121059	1.08753	0.742842	1	-0.0449231	0.969341	0.149822	0.803797	0.233084	1.17535	0.0594091	0.862397	0.278008	1.21252	0.959687	1	-0.00694911	0.995195	0.339728	1	0.149999	1.10957	32.7802	32.51	32.7792	32.8574	32.639	32.868	32.8722	32.7844	32.6247	32.5171	32.7477
Q9CR68	Cytochrome b-c1 complex subunit Rieske, mitochondrial	Uqcrfs1	0.187226	0.922723	0.0592154	1.0419	0.745965	0.995421	0.0208059	1.01453	0.452668	0.954538	-0.0384094	0.973728	0.930088	0.985301	-0.0105228	0.992733	0.253292	1	0.0777626	1.05538	0.810967	0.992454	0.0207621	1.0145	0.412067	0.980541	-0.0570005	0.961261	0.46355	0.984598	0.032795	1.02299	0.905318	1	-0.0136827	0.990561	32.5639	32.6517	32.6295	32.4757	32.5824	32.499	32.5408	32.5057	32.4771	32.4536	32.6488
Q9D172	Glutamine amidotransferase-like class 1 domain-containing protein 3A, mitochondrial	Gatd3a	0.571146	0.960529	-0.0224813	0.984538	0.698891	0.984643	0.040645	1.02857	0.47339	0.934061	0.0631264	1.04473	0.537804	0.931679	0.0412102	1.02898	0.652662	1	-0.0265668	0.981754	0.757697	0.98176	0.0511703	1.03611	0.623152	0.977452	0.0777372	1.05536	0.237302	0.985083	0.0293757	1.02057	0.754421	1	0.0659027	1.04674	32.5263	32.3589	32.4986	32.5314	32.5073	32.5306	32.5031	32.4617	32.5038	32.5324	32.423
A0A571BGC3	Dynein, axonemal, heavy chain 14	Dnah14	0.834419	0.942013	-0.157071	0.896844	0.761876	0.960956	-0.257609	0.836473	0.899029	0.972834	-0.100539	0.932685	0.174954	0.342828	1.58707	3.00439	0.92533	1	0.106661	1.07673	0.236525	0.57397	-1.11895	0.460429	0.209281	0.731604	-1.22561	0.427616	0.662589	0.8842	0.53481	1.44875	0.0165727	0.996615	-2.27787	0.206202	30.6834	30.7276	32.2478	29.6723	30.6321	31.9894	32.2872	29.8212	30.2194	30.0845	29.3629
Q8VDQ8	NAD-dependent protein deacetylase sirtuin-2	Sirt2	0.0406442	0.684051	-0.273008	0.827592	0.14713	0.817912	-0.325058	0.798267	0.800431	0.962236	-0.05205	0.964565	0.803025	0.934834	-0.0634632	0.956964	0.122443	0.944043	-0.318849	0.801709	0.279475	0.793041	-0.36329	0.77739	0.899712	1	-0.0444412	0.969665	0.576729	0.927815	-0.131189	0.913078	0.801112	1	-0.112167	0.925197	32.135	32.1098	32.2021	32.1729	32.3066	32.3919	32.1915	32.7476	32.5022	32.6319	32.1935
Q62277	Synaptophysin	Syp	0.934769	0.986703	0.0067852	1.00471	0.985826	0.999655	-0.00137749	0.999046	0.893742	0.99124	-0.00816269	0.994358	0.704049	0.932393	-0.0526237	0.964181	0.872041	0.999361	-0.020415	0.985949	0.992517	0.998214	0.00106303	1.00074	0.79899	1	0.021478	1.015	0.643955	0.974779	-0.0525653	0.96422	0.823676	1	0.0215365	1.01504	32.4601	32.469	32.586	32.2511	32.3295	32.477	32.5723	32.4554	32.3397	32.3611	32.5506
Q91V14	Solute carrier family 12 member 5	Slc12a5	0.899215	0.9873	-0.00719643	0.995024	0.964771	0.995839	-0.00429649	0.997026	0.97572	0.99536	0.00289993	1.00201	0.925718	0.986071	-0.0153141	0.989441	0.7458	0.999063	-0.0296707	0.979644	0.912907	0.992835	-0.0146281	0.989912	0.922469	0.999135	0.0150426	1.01048	0.735519	0.985794	-0.0382614	0.973828	0.969479	1	-0.00790469	0.994536	32.4184	32.4504	32.3443	32.3746	32.3642	32.3981	32.4158	32.5587	32.2838	32.2521	32.5409
Q9CZW5	Mitochondrial import receptor subunit TOM70	Tomm70	0.536637	0.953128	-0.0376867	0.974216	0.249879	0.943658	-0.0776098	0.947626	0.525907	0.954046	-0.0399231	0.972707	0.899617	0.986468	0.0130978	1.00912	0.700934	0.996828	-0.0354398	0.975734	0.251914	0.909222	-0.11071	0.926132	0.45986	0.978968	-0.0752703	0.949164	0.681435	0.982517	0.0417258	1.02934	0.677655	1	-0.0466423	0.968187	32.5705	32.419	32.5148	32.6043	32.6318	32.5479	32.5077	32.4575	32.6792	32.4951	32.6584
Q9CR62	Mitochondrial 2-oxoglutarate/malate carrier protein	Slc25a11	0.409539	0.903955	-0.0809311	0.945447	0.162385	0.899955	-0.128103	0.915034	0.64447	0.955076	-0.0471718	0.967832	0.377991	0.75901	0.192459	1.14271	0.925735	0.998039	-0.00673803	0.99534	0.0882232	0.788425	-0.213664	0.862345	0.062679	0.896962	-0.206926	0.866381	0.230624	0.81549	0.198812	1.14775	0.13352	1	-0.200573	0.870205	32.33	32.2051	32.4121	32.3089	32.6831	32.3454	32.297	32.3782	32.2711	32.3508	32.2927
Q01097	Glutamate receptor ionotropic, NMDA 2B	Grin2b	0.117634	0.76788	0.224534	1.1684	0.498516	0.918453	0.184804	1.13666	0.866545	0.975104	-0.0397301	0.972837	0.183001	0.501613	-0.450705	0.731685	0.469698	1	0.127917	1.09271	0.352792	0.828012	0.36217	1.28536	0.50928	0.944826	0.234253	1.1763	0.212868	0.785399	-0.218089	0.859703	0.355578	1	0.466868	1.38211	32.8028	32.8187	32.9787	32.4986	32.5498	32.2888	32.7514	32.493	32.6678	32.6868	33.0532
Q9CQ69	Cytochrome b-c1 complex subunit 8	Uqcrq	0.310687	0.941675	-0.0402323	0.972498	0.775143	0.994855	-0.0216005	0.985139	0.793183	0.980018	0.0186317	1.013	0.428049	0.889261	0.0691299	1.04908	0.719487	0.999307	-0.0134913	0.990692	0.809885	0.989074	-0.028525	0.980422	0.902431	1	-0.0150337	0.989634	0.747405	0.989558	0.0235023	1.01642	0.699662	1	-0.0606613	0.958825	32.3047	32.3872	32.3501	32.3849	32.4799	32.3423	32.3314	32.4452	32.386	32.3554	32.3285
P51830	Adenylate cyclase type 9	Adcy9	0.16178	0.837149	-0.103998	0.930451	0.391001	0.97265	-0.0592701	0.95975	0.57821	0.952154	0.0447281	1.03149	0.997596	0.999044	-0.000310898	0.999785	0.302995	1	-0.102614	0.931344	0.748318	0.990926	-0.02786	0.980874	0.550846	0.976432	0.0747541	1.05318	0.702357	0.979094	0.0533231	1.03765	0.300562	1	0.128388	1.09307	32.3624	32.2402	32.2998	32.3078	32.3511	32.526	32.5447	32.2584	32.3526	32.4655	32.4122
Q61598	Rab GDP dissociation inhibitor beta	Gdi2	0.51561	0.952175	-0.0311344	0.97865	0.278234	0.951853	0.0752247	1.05353	0.100557	0.850468	0.106359	1.07651	0.298976	0.873139	0.0774879	1.05518	0.714551	1	0.020476	1.01429	0.123044	0.887572	0.146083	1.10656	0.226074	0.950579	0.125607	1.09097	0.522135	0.975909	0.0459309	1.03235	0.427448	1	0.0940495	1.06736	32.4058	32.5084	32.5387	32.5691	32.5702	32.5581	32.4369	32.6066	32.5114	32.4313	32.5421
Q5SQX6	Cytoplasmic FMR1-interacting protein 2	Cyfip2	0.835883	0.987496	0.00956421	1.00665	0.529724	0.969638	0.0555954	1.03929	0.597126	0.95247	0.0460312	1.03242	0.382295	0.84844	-0.0986195	0.933926	0.919807	0.998136	-0.00560379	0.996123	0.233767	0.898826	0.136861	1.09951	0.26544	0.940224	0.142465	1.10379	0.70196	0.985686	-0.0375735	0.974292	0.212701	1	0.203511	1.1515	32.4624	32.4786	32.4506	32.4562	32.3502	32.5095	32.5384	32.3671	32.4968	32.4892	32.5677
P23819	Glutamate receptor 2	Gria2	0.792221	0.973234	0.0187334	1.01307	0.295427	0.893587	0.213603	1.15958	0.290464	0.814162	0.19487	1.14462	0.380701	0.895944	-0.0631657	0.957162	0.858832	0.999736	0.0193926	1.01353	0.196911	0.729477	0.386286	1.30702	0.235307	0.87169	0.366893	1.28957	0.672125	0.97546	-0.0559038	0.961992	0.327255	1	0.374155	1.29608	32.4579	32.4965	32.6357	32.5177	32.4716	32.4778	32.7155	32.4489	32.4274	32.4813	32.5944
P56391	Cytochrome c oxidase subunit 6B1	Cox6b1	0.811762	0.980205	-0.0141504	0.99024	0.672493	0.970387	0.0760267	1.05411	0.56843	0.924799	0.0901772	1.0645	0.735092	0.959398	-0.0300674	0.979375	0.865855	0.995239	0.0138232	1.00963	0.493862	0.904829	0.184163	1.13616	0.51524	0.96436	0.17034	1.12532	0.295425	0.930755	0.0837345	1.05976	0.42256	1	0.284142	1.21769	32.5163	32.3633	32.5778	32.5416	32.6224	32.5059	32.5483	32.4142	32.4787	32.6451	32.5432
P47754	F-actin-capping protein subunit alpha-2	Capza2	0.865552	0.983587	0.0147547	1.01028	0.175375	0.883658	0.207945	1.15504	0.187432	0.792786	0.19319	1.14329	0.955709	0.991737	0.00871849	1.00606	0.738164	0.997267	0.0381991	1.02683	0.0822629	0.642713	0.354371	1.27843	0.127931	0.872236	0.316172	1.24502	0.760582	0.982997	0.050806	1.03584	0.143008	1	0.358259	1.28188	32.5976	32.5031	32.718	32.6092	32.4841	32.7613	32.7418	32.4574	32.5165	32.6256	32.6023
P35803	Neuronal membrane glycoprotein M6-b	Gpm6b	0.682477	0.949613	0.0382404	1.02686	0.856365	0.993944	0.0323589	1.02268	0.972227	0.993552	-0.0058815	0.995932	0.0184391	0.447533	-0.276226	0.825748	0.7629	0.996839	-0.0402934	0.972457	0.583073	0.921721	0.134055	1.09737	0.525191	0.96479	0.174348	1.12845	0.542609	0.93222	-0.105972	0.929179	0.314332	1	0.344602	1.2698	32.4493	32.3398	32.3495	32.2248	32.2041	32.274	32.5293	32.1248	32.3809	32.5002	32.5303
Q9QYG0	Protein NDRG2	Ndrg2	0.32253	0.918744	0.0672066	1.04769	0.713308	0.994758	0.0199371	1.01392	0.491621	0.94804	-0.0472694	0.967766	0.800578	0.973453	0.0220947	1.01543	0.358593	1	0.0793686	1.05656	0.848505	0.992801	-0.0141436	0.990244	0.411895	0.97901	-0.0935122	0.937238	0.436502	0.931266	0.0964502	1.06914	0.853499	1	-0.0191568	0.986809	32.5481	32.457	32.4495	32.4208	32.5199	32.3991	32.3098	32.5126	32.2668	32.3901	32.4848
Q8BRV5	Uncharacterized protein KIAA1671	Kiaa1671	0.202662	0.839957	-0.10485	0.929901	0.410328	0.940246	-0.109311	0.927031	0.970878	0.993235	-0.00446091	0.996913	0.146061	0.699253	-0.203558	0.868406	0.454835	1	-0.0946808	0.936479	0.698259	0.99262	0.0335897	1.02356	0.313319	0.958479	0.12827	1.09298	0.657407	0.966671	0.0620931	1.04398	0.0250016	1	0.393922	1.31396	32.4365	32.2929	32.494	32.3468	32.5529	32.5163	32.6669	32.3615	32.3893	32.824	32.6524
P42669	Transcriptional activator protein Pur-alpha	Pura	0.316311	0.83918	-0.131104	0.913132	0.546913	0.979934	-0.0423574	0.971067	0.386393	0.909215	0.0887466	1.06345	0.135871	0.71166	0.18351	1.13564	0.676707	1	-0.0818914	0.944818	0.625563	0.969964	-0.0563202	0.961714	0.881812	1	0.0255712	1.01788	0.59145	0.933428	0.124369	1.09003	0.609127	1	-0.0335693	0.977	32.4708	32.3434	32.6583	32.4042	32.7505	32.5993	32.8474	32.4785	32.3257	32.4914	32.4914
Q9DCJ5	NADH dehydrogenase [ubiquinone] 1 alpha subcomplex subunit 8	Ndufa8	0.681066	0.950159	0.0391953	1.02754	0.460947	0.95791	-0.0782089	0.947233	0.331316	0.876239	-0.117404	0.921845	0.664926	0.909078	-0.0718155	0.95144	0.581007	1	0.0819778	1.05847	0.661259	0.969099	-0.0658188	0.955403	0.476927	0.962434	-0.147797	0.902628	0.804434	0.985939	0.0478891	1.03375	0.896156	1	-0.0280921	0.980716	32.5027	32.5269	32.6213	32.6433	32.4979	32.6283	32.302	32.4872	32.7565	32.5079	32.7619
P19096	Fatty acid synthase	Fasn	0.204733	0.939968	-0.0482199	0.967129	0.508231	0.97962	0.0415262	1.0292	0.148588	0.886812	0.0897461	1.06418	0.0117538	0.715875	0.141848	1.10332	0.57211	1	-0.0324071	0.977788	0.813265	0.990002	0.0226046	1.01579	0.600364	0.983723	0.0550117	1.03887	0.802572	0.992359	0.0163091	1.01137	0.568468	1	-0.0705268	0.95229	32.4471	32.4336	32.5246	32.4945	32.5178	32.5481	32.5445	32.5777	32.4278	32.3877	32.3946
P63168	Dynein light chain 1, cytoplasmic	Dynll1	0.311017	0.932173	-0.0566633	0.961485	0.166654	0.889975	0.167176	1.12286	0.0514762	0.708035	0.22384	1.16784	0.201311	0.759863	0.142643	1.10393	0.928789	0.996707	-0.00545247	0.996228	0.0919383	0.743079	0.272518	1.20791	0.0717586	0.863652	0.277971	1.21249	0.0551654	0.844497	0.126698	1.09179	0.184193	1	0.262025	1.19916	32.6156	32.615	32.7098	32.5285	32.7118	32.7881	32.6518	32.6409	32.5769	32.5416	32.673
Q8BKX1	Brain-specific angiogenesis inhibitor 1-associated protein 2	Baiap2	0.81957	0.963323	-0.0274328	0.981165	0.733575	0.972445	0.121895	1.08816	0.635361	0.909437	0.149327	1.10905	0.312214	0.708161	-0.280289	0.823426	0.405244	1	-0.134257	0.911139	0.548101	0.898852	0.301481	1.23241	0.399674	0.892299	0.435738	1.3526	0.559311	0.936217	-0.102873	0.931176	0.380008	1	0.613153	1.5296	32.8193	32.5705	32.7156	32.3836	32.6856	32.4903	32.9047	32.6077	32.56	32.6833	33.0532
P63330	Serine/threonine-protein phosphatase 2A catalytic subunit alpha isoform	Ppp2ca	0.0539283	0.867935	0.0776569	1.0553	0.348866	0.912878	0.144258	1.10516	0.613119	0.944078	0.0666016	1.04725	0.710497	0.932189	-0.0538769	0.963344	0.106655	1	0.0895208	1.06402	0.282293	0.843094	0.236441	1.17808	0.478063	0.962896	0.146921	1.1072	0.315919	0.964423	0.0478128	1.0337	0.404888	1	0.24861	1.18806	32.5316	32.5154	32.5601	32.432	32.4222	32.4994	32.4532	32.405	32.3807	32.3948	32.6346
Q8R081	Heterogeneous nuclear ribonucleoprotein L	Hnrnpl	0.174402	0.807253	0.16185	1.11872	0.788247	0.99351	0.0250317	1.0175	0.279056	0.842384	-0.136819	0.909523	0.212121	0.701927	-0.230644	0.852254	0.620859	1	0.0566114	1.04002	0.902235	0.993605	-0.017657	0.987836	0.663687	0.979241	-0.0742683	0.949824	0.18644	0.75134	-0.260604	0.834739	0.57463	1	-0.104228	0.930303	32.6483	32.7164	32.6586	32.5578	32.4489	32.2052	32.431	32.5727	32.7593	32.5204	32.595
D3YZU1	SH3 and multiple ankyrin repeat domains protein 1	Shank1	0.484409	0.90307	0.0910889	1.06517	0.563934	0.944106	0.139433	1.10147	0.824456	0.96742	0.0483444	1.03408	0.271004	0.70315	-0.263176	0.833252	0.964867	0.997782	-0.00818634	0.994342	0.477479	0.898195	0.247838	1.18743	0.477811	0.928537	0.256025	1.19418	0.447573	0.884767	-0.159398	0.895399	0.437318	1	0.359803	1.28325	32.7195	32.5435	32.7803	32.4086	32.4901	32.3624	32.8583	32.4301	32.4685	32.5268	32.8521
Q6ZQ38	Cullin-associated NEDD8-dissociated protein 1	Cand1	0.0305456	0.87803	0.0709091	1.05038	0.812552	0.994336	-0.0092659	0.993598	0.0198514	0.884808	-0.080175	0.945943	0.316317	0.858675	-0.0863705	0.941889	0.177811	1	0.0686162	1.04871	0.882843	0.996351	-0.00742849	0.994864	0.0845537	0.976334	-0.0760447	0.948655	0.979955	1	-0.000639598	0.999557	0.882986	1	0.00968615	1.00674	32.4119	32.4669	32.4088	32.3355	32.3403	32.3286	32.3584	32.3469	32.3	32.3559	32.4858
Q3TXX4	Vesicular glutamate transporter 1	Slc17a7	0.310056	0.842942	0.115141	1.08308	0.270689	0.921915	0.120159	1.08685	0.965644	0.99357	0.00501862	1.00348	0.244978	0.713287	-0.222406	0.857135	0.827792	0.994053	0.0317052	1.02222	0.0362519	0.788732	0.188341	1.13945	0.311479	0.934404	0.156635	1.11468	0.646441	0.952633	-0.094443	0.936634	0.0373016	1	0.284599	1.21807	32.7249	32.4956	32.632	32.4992	32.3052	32.5271	32.7668	32.3572	32.4077	32.5589	32.7182
P28660	Nck-associated protein 1	Nckap1	0.731352	0.975201	0.0163992	1.01143	0.285533	0.902803	0.140829	1.10254	0.289697	0.860878	0.12443	1.09008	0.497091	0.914046	-0.0513058	0.965062	0.758488	0.999649	-0.0179914	0.987607	0.219318	0.827243	0.223595	1.16764	0.200035	0.889209	0.241587	1.18229	0.717877	0.993724	-0.0298551	0.979519	0.269492	1	0.263037	1.2	32.5349	32.4126	32.5044	32.4183	32.3711	32.4954	32.549	32.3923	32.4478	32.4895	32.4795
P27773	Protein disulfide-isomerase A3	Pdia3	0.582636	0.960398	-0.0232523	0.984012	0.353183	0.970256	0.0595182	1.04212	0.112261	0.890426	0.0827705	1.05905	0.770462	0.959841	0.0340061	1.02385	0.753096	0.999803	-0.0161285	0.988883	0.238781	0.912428	0.0991516	1.07114	0.104947	0.944582	0.11528	1.08319	0.373921	0.981126	-0.0374521	0.974374	0.684401	1	0.043822	1.03084	32.4102	32.5678	32.4094	32.5186	32.4322	32.5223	32.4974	32.5147	32.5319	32.5347	32.3518
Q62425	Cytochrome c oxidase subunit NDUFA4	Ndufa4	0.953726	0.993516	-0.00355015	0.997542	0.407124	0.920621	-0.137226	0.909266	0.381913	0.872229	-0.133675	0.911506	0.586794	0.953687	-0.0309658	0.978765	0.551266	1	0.0508461	1.03587	0.574298	0.914977	-0.151302	0.900437	0.474018	0.952144	-0.202148	0.869255	0.316932	0.888187	0.113183	1.08161	0.867246	1	-0.0579999	0.960595	32.5084	32.4888	32.5508	32.5951	32.5838	32.6307	32.4563	32.3927	32.6331	32.6804	32.596
P84086	Complexin-2	Cplx2	0.607775	0.940717	0.0522007	1.03685	0.243158	0.901436	0.148249	1.10822	0.365181	0.899622	0.096048	1.06884	0.44819	0.841973	-0.117851	0.921559	0.947012	0.998421	0.0103849	1.00722	0.139475	0.79373	0.249032	1.18841	0.111411	0.893938	0.238647	1.17989	0.414394	0.904489	-0.114272	0.923849	0.160877	1	0.242227	1.18282	32.4817	32.7223	32.4194	32.3501	32.3437	32.4015	32.6338	32.317	32.5099	32.3679	32.613
P62821	Ras-related protein Rab-1A	Rab1A	0.827569	0.985991	-0.0120081	0.991711	0.744904	0.992543	-0.0276865	0.980992	0.840916	0.986091	-0.0156784	0.989191	0.10834	0.757955	0.123722	1.08954	0.529354	1	0.0408516	1.02872	0.609652	0.962768	-0.0677605	0.954118	0.394117	0.974183	-0.108612	0.92748	0.0751142	0.849976	0.126148	1.09138	0.511924	1	-0.106186	0.929041	32.4534	32.5544	32.3715	32.463	32.5903	32.5062	32.4703	32.42	32.3761	32.4388	32.4103
P12382	ATP-dependent 6-phosphofructokinase, liver type	Pfkl	0.990201	0.99933	-0.000639343	0.999557	0.195364	0.894547	0.177153	1.13065	0.16016	0.78909	0.177792	1.13115	0.701089	0.946093	0.038126	1.02678	0.99711	0.999577	-0.000241597	0.999833	0.145129	0.782733	0.270662	1.20636	0.164585	0.892993	0.270903	1.20656	0.642957	0.979842	0.0467135	1.03291	0.248202	1	0.279491	1.21377	32.5081	32.4172	32.4783	32.4094	32.4147	32.5492	32.5194	32.322	32.4643	32.4976	32.3901
P20029	Endoplasmic reticulum chaperone BiP	Hspa5	0.0703934	0.875629	0.0750362	1.05339	0.0682323	0.886105	0.157933	1.11569	0.231716	0.903843	0.0828972	1.05914	0.545064	0.900765	-0.0616779	0.958149	0.41923	1	0.0408274	1.0287	0.0281367	0.743544	0.220108	1.16482	0.0399878	0.88992	0.179281	1.13232	0.276834	0.960003	-0.0521577	0.964493	0.132393	1	0.188801	1.13982	32.7286	32.6995	32.6022	32.7238	32.5549	32.6095	32.6018	32.6859	32.6154	32.7247	32.563
Q9Z1G3	V-type proton ATPase subunit C 1	Atp6v1c1	0.493831	0.936499	-0.0555845	0.962205	0.973283	0.998221	0.00244617	1.0017	0.517571	0.942991	0.0580307	1.04104	0.822434	0.973897	0.0208435	1.01455	0.947172	0.998658	-0.00741831	0.994871	0.408016	0.942105	0.0754038	1.05366	0.523439	0.980116	0.0828222	1.05909	0.482421	0.924781	0.108885	1.07839	0.16272	1	0.170863	1.12573	32.3352	32.4247	32.3596	32.2767	32.5453	32.3946	32.5462	32.313	32.2239	32.4806	32.4176
Q0VF55	Calcium-transporting ATPase	Atp2b3	0.267302	0.938333	0.0483595	1.03409	0.876047	0.997048	0.00618038	1.00429	0.385595	0.94922	-0.0421791	0.971187	0.122703	0.719395	-0.164331	0.892342	0.768789	0.996739	0.0109151	1.00759	0.224978	0.962317	0.0501709	1.03539	0.369929	0.992532	0.0392558	1.02758	0.209762	0.90367	-0.0922241	0.938075	0.0591627	1	0.111363	1.08025	32.3549	32.3104	32.3682	32.3794	32.3112	32.1878	32.3772	32.288	32.36	32.4291	32.3986
Q9Z2H5	Band 4.1-like protein 1	Epb41l1	0.146865	0.869212	0.0825869	1.05892	0.386794	0.976915	0.0423449	1.02979	0.477689	0.954597	-0.040242	0.972492	0.588352	0.982379	0.0120926	1.00842	0.235391	1	0.0956713	1.06856	0.780752	0.990533	0.0205396	1.01434	0.458011	0.979743	-0.0751317	0.949255	0.423844	0.945276	0.0777302	1.05536	0.917345	1	-0.00949415	0.993441	32.3753	32.3211	32.3315	32.2573	32.2692	32.3016	32.1771	32.1143	32.3315	32.2831	32.2635
Q64433;Q9JI95	10 kDa heat shock protein, mitochondrial;CPN10-like protein	Hspe1;Hspe1-rs1	0.271597	0.919573	-0.0653547	0.95571	0.915426	0.995626	-0.00539684	0.996266	0.342473	0.934074	0.0599579	1.04244	0.056696	0.633355	0.225983	1.16957	0.989878	1	-0.000583649	0.999596	0.401845	0.965879	-0.0513089	0.96506	0.38172	0.978798	-0.0507253	0.965451	0.0223271	0.755708	0.16954	1.1247	0.215599	1	-0.107168	0.928409	32.308	32.3113	32.2322	32.344	32.4456	32.4863	32.3312	32.2416	32.3165	32.2924	32.1875
Q9JLM8	Serine/threonine-protein kinase DCLK1	Dclk1	0.021105	0.705367	0.227561	1.17085	0.27479	0.918186	0.125371	1.09079	0.280282	0.885981	-0.10219	0.931617	0.0436006	0.574195	-0.242208	0.84545	0.132561	0.95525	0.226916	1.17033	0.19964	0.831911	0.218071	1.16318	0.94942	0.998097	-0.00884501	0.993888	0.720941	0.985612	-0.0386728	0.97355	0.266367	1	0.194691	1.14448	32.4982	32.7389	32.5068	32.4268	32.2756	32.3082	32.2203	32.2957	32.4757	32.4844	32.5838
Q3UHJ0	AP2-associated protein kinase 1	Aak1	0.711342	0.976123	-0.0158916	0.989045	0.452545	0.972322	-0.0464542	0.968313	0.623316	0.967171	-0.0305626	0.979038	0.618182	0.906769	-0.0639095	0.956668	0.92299	0.998519	0.00635656	1.00442	0.97007	0.998736	-0.00197474	0.998632	0.911425	0.99723	-0.0083313	0.994242	0.509251	0.964944	0.0542202	1.0383	0.344624	1	0.109798	1.07908	32.2491	32.2693	32.284	32.2008	32.302	32.2965	32.3509	32.1595	32.2247	32.2538	32.4725
P99028	Cytochrome b-c1 complex subunit 6, mitochondrial	Uqcrh	0.668019	0.950484	-0.03922	0.973181	0.502509	0.935346	-0.137165	0.909304	0.585289	0.922611	-0.0979446	0.934363	0.915835	0.981423	0.0223961	1.01564	0.457743	1	-0.0746053	0.949602	0.434227	0.895281	-0.252777	0.839279	0.556652	0.965214	-0.178172	0.883822	0.886888	0.993105	-0.02049	0.985898	0.584415	1	-0.221058	0.857936	32.406	32.4716	32.184	32.2363	32.5254	32.1774	32.3601	32.3432	32.4124	32.2592	32.3988
O35143	ATPase inhibitor, mitochondrial	ATP5IF1	0.936114	0.987395	-0.00767136	0.994697	0.553477	0.968591	-0.0631416	0.957177	0.586508	0.949678	-0.0554703	0.962281	0.865798	0.975671	-0.0194111	0.986635	0.603173	1	0.0565809	1.04	0.881851	0.994572	-0.0229289	0.984233	0.558878	0.97776	-0.0795097	0.946379	0.109674	0.757783	0.207319	1.15454	0.405238	1	0.147221	1.10743	32.3533	32.1242	32.2828	32.4286	32.5198	32.3388	32.125	32.2702	32.2708	32.4944	32.4031
Q8K0T0	Reticulon-1	Rtn1	0.0610723	0.821269	0.118263	1.08543	0.177222	0.9399	0.0876951	1.06267	0.539058	0.962176	-0.0305679	0.979035	0.100287	0.76053	-0.127947	0.915133	0.308733	1	0.0936584	1.06707	0.123194	0.898189	0.12801	1.09279	0.566697	0.999239	0.0343513	1.0241	0.740627	0.989892	-0.0251408	0.982725	0.032963	1	0.137157	1.09974	32.4343	32.4731	32.3951	32.2601	32.228	32.2866	32.3742	32.2747	32.1984	32.3526	32.4179
O08585	Clathrin light chain A	Clta	0.820574	0.98567	-0.012303	0.991508	0.680102	0.979527	-0.0506395	0.965508	0.709123	0.963436	-0.0383366	0.973777	0.324896	0.809538	-0.123617	0.917883	0.732067	0.999666	-0.0178286	0.987718	0.996326	0.99859	0.000688553	1.00048	0.897005	1	0.0185172	1.01292	0.0646551	0.898047	0.084458	1.06029	0.30825	1	0.226592	1.17007	32.3257	32.0783	32.2107	32.2164	32.2954	32.2461	32.1999	32.1507	32.2082	32.4866	32.3021
Q91V12	Cytosolic acyl coenzyme A thioester hydrolase	Acot7	0.487231	0.951175	-0.0310045	0.978739	0.717304	0.991979	-0.017042	0.988257	0.80253	0.986301	0.0139626	1.00973	0.650554	0.955769	-0.0315666	0.978357	0.935825	0.996752	-0.00408681	0.997171	0.106171	0.969977	0.0402285	1.02828	0.427384	0.989746	0.0443153	1.03119	0.366812	0.93581	0.0785866	1.05598	0.0100102	1	0.154469	1.11301	32.3134	32.3026	32.3039	32.2794	32.321	32.4351	32.3926	32.264	32.2417	32.3915	32.4276
P35700	Peroxiredoxin-1	Prdx1	0.792135	0.976198	-0.0160753	0.988919	0.0150909	0.854375	0.184758	1.13663	0.0126705	0.703723	0.200833	1.14936	0.0914936	0.721017	0.15571	1.11397	0.749784	0.996808	0.0283737	1.01986	0.0120479	0.643733	0.259289	1.19689	0.0768415	0.881276	0.230915	1.17358	0.743295	0.985998	0.0372168	1.02613	0.257801	1	0.112422	1.08104	32.3393	32.4758	32.4144	32.4823	32.4595	32.4732	32.2991	32.5754	32.4129	32.3608	32.2605
Q61301	Catenin alpha-2	Ctnna2	0.86532	0.9731	0.0231058	1.01614	0.827308	0.992116	-0.0315794	0.978349	0.670121	0.951012	-0.0546852	0.962804	0.323467	0.742058	-0.191322	0.875803	0.438616	1	-0.124402	0.917384	0.695422	0.962234	-0.0879962	0.940829	0.852112	1	0.0364062	1.02556	0.213836	0.781953	-0.226229	0.854867	0.994928	1	0.00149981	1.00104	32.4937	32.4769	32.275	32.0451	32.3089	32.0187	32.4608	32.2431	32.4662	32.3803	32.33
P54227	Stathmin	Stmn1	0.67173	0.940026	-0.0672233	0.954473	0.720619	0.959514	-0.166576	0.890955	0.81015	0.953117	-0.0993523	0.933452	0.398614	0.634081	0.75875	1.69202	0.665029	1	-0.0817095	0.944937	0.013678	0.285538	-0.75313	0.593315	0.0434196	0.65433	-0.67142	0.627888	0.436788	0.855583	0.198532	1.14753	0.118178	1	-1.23164	0.425834	32.1722	31.713	31.7413	31.9354	32.183	31.9707	31.6462	32.1865	31.8021	32.0229	30.6132
P23242	Gap junction alpha-1 protein	Gja1	0.167017	0.759493	0.273541	1.20877	0.0704633	0.687662	0.389658	1.31008	0.510932	0.902645	0.116117	1.08381	0.729507	0.886668	-0.150152	0.901155	0.485036	1	0.147661	1.10777	0.080748	0.558012	0.441291	1.35782	0.0377784	0.855088	0.29363	1.22572	0.0265139	0.712676	-0.436607	0.73887	0.981725	1	0.00717545	1.00499	32.604	33.034	32.9145	32.4488	32.1412	32.2884	32.5094	32.7269	32.718	31.9943	32.7356
Q91WD5	NADH dehydrogenase [ubiquinone] iron-sulfur protein 2, mitochondrial	Ndufs2	0.885777	0.987918	-0.00930462	0.993571	0.979691	0.999776	-0.00174007	0.998795	0.907269	0.991723	0.00756454	1.00526	0.0859654	0.72033	0.152201	1.11126	0.162822	1	0.0851784	1.06082	0.966266	0.997897	-0.00368118	0.997452	0.328982	0.977085	-0.0888596	0.940266	0.0809605	0.827267	0.144183	1.10511	0.378648	1	-0.0968768	0.935055	32.1625	32.243	32.3144	32.3719	32.4165	32.321	32.1598	32.2692	32.2447	32.2184	32.2148
Q8BWF0	Succinate-semialdehyde dehydrogenase, mitochondrial	Aldh5a1	0.217133	0.95092	-0.0283976	0.980509	0.150048	0.941826	-0.0823687	0.944506	0.271346	0.936732	-0.0539711	0.963281	0.998782	0.999386	0.000101089	1.00007	0.330098	1	-0.033989	0.976716	0.124342	0.896255	-0.124008	0.917635	0.242489	0.973655	-0.0900192	0.93951	0.916556	1	0.00382423	1.00265	0.405227	1	-0.0862961	0.941938	32.2423	32.25	32.2051	32.1865	32.2351	32.2682	32.247	32.2902	32.2063	32.1952	32.3079
Q9DCT2	NADH dehydrogenase [ubiquinone] iron-sulfur protein 3, mitochondrial	Ndufs3	0.956632	0.993353	-0.00300522	0.997919	0.0292	0.889026	-0.131724	0.91274	0.0646765	0.827584	-0.128719	0.914643	0.732384	0.964633	0.0272045	1.01904	0.558073	1	0.035656	1.02502	0.0072935	0.74931	-0.197011	0.872356	0.0183444	0.859845	-0.232667	0.85106	0.22926	0.87979	0.120069	1.08679	0.0649089	1	-0.139803	0.907643	32.1288	32.1056	32.0477	32.1209	32.2356	32.116	31.9998	32.0093	32.158	32.1836	32.1136
Q4KMM3	Oxidation resistance protein 1	Oxr1	0.20436	0.926578	0.0567205	1.0401	0.952627	0.995434	-0.00552006	0.996181	0.423923	0.935441	-0.0622406	0.957775	0.120204	0.756213	-0.134062	0.911262	0.318568	1	0.0711187	1.05053	0.670715	0.974722	0.0567589	1.04013	0.903436	1	-0.0143598	0.990096	0.350245	0.984266	0.034057	1.02389	0.367445	1	0.153759	1.11246	32.1589	32.2754	32.1319	32.0786	32.1059	32.144	32.1318	32.08	32.0608	32.2114	32.3065
Q9R1T4	Septin-6	Septin6	0.958473	0.993703	0.0030674	1.00213	0.104857	0.881659	-0.173747	0.886537	0.0822038	0.776311	-0.176814	0.884654	0.722306	0.935558	-0.0504112	0.965661	0.772163	0.99518	-0.024629	0.983073	0.0301395	0.6466	-0.285712	0.820337	0.0841176	0.876357	-0.261083	0.834461	0.948984	1	0.00700378	1.00487	0.245473	1	-0.203668	0.86834	32.1952	32.0511	32.1136	32.0549	32.0811	32.1286	32.0577	32.2464	31.9894	32.0342	32.2763
Q91VM5;A0A2I3BRL8	RNA binding motif protein, X-linked-like-1;RRM domain-containing protein	Rbmxl1;Gm7324	0.114032	0.602081	0.539169	1.45314	0.086717	0.891008	0.149206	1.10896	0.185841	0.67293	-0.389962	0.76315	0.102728	0.365202	-0.920044	0.528493	0.39098	1	0.206769	1.1541	0.0451584	0.832855	0.170194	1.12521	0.876008	1	-0.0365747	0.974967	0.0793196	0.70084	-0.892872	0.538541	0.95236	1	-0.00940291	0.993504	32.2412	32.3396	32.3864	32.2944	31.5107	30.9703	31.7633	32.1339	32.503	31.989	32.3321
P80314	T-complex protein 1 subunit beta	Cct2	0.0565131	0.867351	0.0781651	1.05567	0.00151315	0.884517	0.135739	1.09866	0.131026	0.924892	0.0575737	1.04071	0.220913	0.837471	0.0941486	1.06744	0.0905513	1	0.107623	1.07745	0.00625964	0.832017	0.140813	1.10253	0.539104	0.998749	0.0331904	1.02327	0.469886	0.968191	0.0483608	1.03409	0.807273	1	-0.0125974	0.991306	32.3092	32.3517	32.379	32.3182	32.2823	32.2985	32.322	32.2383	32.1657	32.1433	32.2492
Q7TQI3	Ubiquitin thioesterase OTUB1	Otub1	0.969903	0.995122	0.00265923	1.00184	0.93538	0.996799	-0.0066288	0.995416	0.879444	0.991476	-0.00928802	0.993583	0.64189	0.906552	-0.0664845	0.954962	0.990206	1	-0.00111643	0.999226	0.787083	0.989709	0.0277265	1.0194	0.701091	1	0.0288429	1.02019	0.193031	0.896524	-0.095672	0.935836	0.997797	0.9995	-0.000344594	0.999761	32.0362	32.3113	32.1636	32.0477	32.042	32.1173	32.2486	32.1596	32.1177	32.0295	32.2628
P47757	F-actin-capping protein subunit beta	Capzb	0.285468	0.900097	-0.0754004	0.949079	0.477712	0.95088	0.090061	1.06442	0.200585	0.813532	0.165461	1.12152	0.805205	0.975836	-0.016449	0.988663	0.500891	1	-0.0739644	0.950024	0.177039	0.831698	0.21277	1.15891	0.146964	0.876878	0.286735	1.21988	0.916816	1	0.0148169	1.01032	0.150221	1	0.318001	1.2466	32.3227	32.2514	32.3326	32.3301	32.3409	32.4461	32.5639	32.2394	32.3327	32.3842	32.4357
P10852	4F2 cell-surface antigen heavy chain	Slc3a2	0.00946957	0.836772	0.0884035	1.06319	0.722799	0.995035	0.0205545	1.01435	0.208237	0.922333	-0.067849	0.954059	0.0290131	0.935566	0.0306187	1.02145	0.0410575	1	0.104857	1.07539	0.708507	0.992223	-0.0286369	0.980346	0.12842	0.924767	-0.133494	0.911621	0.240781	0.968304	0.0429198	1.0302	0.250395	1	-0.121193	0.919427	32.2924	32.3405	32.2794	32.2488	32.2248	32.2305	32.1679	32.2297	32.1565	32.1925	32.2015
Q9D3D9	ATP synthase subunit delta, mitochondrial	Atp5f1d	0.509244	0.933411	-0.0630404	0.957245	0.712832	0.984014	-0.0447412	0.969464	0.878031	0.985278	0.0182991	1.01276	0.375559	0.758857	0.197023	1.14633	0.777646	1	-0.0380796	0.973951	0.362507	0.904908	-0.13893	0.908192	0.561122	0.982378	-0.10085	0.932483	0.403794	0.888616	0.134774	1.09792	0.473777	1	-0.1631	0.893104	32.0935	31.8466	32.0255	32.0611	32.1325	32.1686	32.0642	31.8108	32.1724	31.7802	32.1269
Q02248	Catenin beta-1	Ctnnb1	0.247916	0.809358	0.165836	1.12182	0.86058	0.993297	0.0238308	1.01666	0.282205	0.843591	-0.142005	0.906259	0.232302	0.670448	-0.283125	0.821809	0.642234	1	0.0885633	1.06331	0.852168	0.991241	0.040638	1.02857	0.809887	0.998767	-0.0479253	0.967326	0.430576	0.874922	-0.166032	0.891291	0.752575	1	0.0691675	1.04911	32.4558	32.6688	32.3734	32.1949	32.3124	32.0031	32.2339	32.1952	32.5424	32.5042	32.3776
Q9D0K2	Succinyl-CoA:3-ketoacid coenzyme A transferase 1, mitochondrial	Oxct1	0.870575	0.98716	-0.00615292	0.995744	0.379413	0.962307	0.0688288	1.04886	0.283924	0.913757	0.0749817	1.05335	0.254393	0.901529	0.0499744	1.03525	0.403333	1	0.0388234	1.02728	0.277321	0.902287	0.130477	1.09466	0.430531	0.975265	0.0916532	1.06559	0.238229	0.953102	0.0620956	1.04398	0.484423	1	0.103774	1.07458	32.1946	32.2223	32.2858	32.3174	32.2791	32.3178	32.2092	32.2978	32.2021	32.2235	32.2734
Q61656	Probable ATP-dependent RNA helicase DDX5	Ddx5	0.138856	0.836104	-0.110233	0.926439	0.58069	0.984747	-0.0353304	0.975808	0.252774	0.911355	0.0749023	1.05329	0.682641	0.935432	-0.0462837	0.968428	0.155575	0.999523	-0.150216	0.901115	0.945942	0.995512	0.00547663	1.0038	0.0891508	0.910674	0.155693	1.11396	0.227852	0.876577	-0.122821	0.91839	0.407927	1	0.0791556	1.0564	32.2326	32.398	32.2082	32.2015	32.343	32.2502	32.4691	32.4834	32.3058	32.429	32.2568
Q80TE7	Leucine-rich repeat-containing protein 7	Lrrc7	0.262924	0.813804	0.164201	1.12055	0.637709	0.970656	0.0869688	1.06214	0.675134	0.944175	-0.0772324	0.947874	0.203529	0.543252	-0.44039	0.736936	0.748077	1	0.0502942	1.03548	0.381784	0.897391	0.215167	1.16084	0.493571	0.962976	0.164872	1.12107	0.33163	0.818351	-0.234311	0.850091	0.25521	1	0.370951	1.29321	32.5971	32.5619	32.6683	32.3189	32.4368	32.0267	32.6116	32.2664	32.5203	32.5545	32.7898
Q8CHH9	Septin-8	Septin8	0.302812	0.939707	-0.0426597	0.970863	0.198913	0.952803	-0.0651778	0.955827	0.592912	0.975462	-0.0225182	0.984513	0.393182	0.948551	0.0295334	1.02068	0.271074	1	-0.0494645	0.966295	0.154612	0.903605	-0.106684	0.92872	0.438002	0.982406	-0.0572192	0.961115	0.354611	0.963589	0.0519587	1.03667	0.671508	1	-0.0347939	0.976171	32.1112	31.9648	32.0333	32.0044	32.1296	32.0749	32.1169	32.0185	32.0155	32.0721	32.0733
P27546	Microtubule-associated protein 4	Map4	0.802635	0.963558	0.0246291	1.01722	0.558843	0.977243	-0.0465024	0.968281	0.446152	0.925081	-0.0711315	0.951891	0.278262	0.73306	-0.187778	0.877957	0.787682	0.999756	-0.0343711	0.976457	0.826833	0.989339	-0.0277386	0.980957	0.961299	0.997203	0.00663249	1.00461	0.435818	0.88713	-0.135487	0.910363	0.649289	1	0.0589231	1.04169	32.0325	31.8904	31.9945	32.1551	32.0391	31.7853	31.8819	32.0645	32.1965	32.0897	32.1103
P21619	Lamin-B2	Lmnb2	0.2374	0.804983	0.1848	1.13666	0.899399	0.990934	-0.0271777	0.981338	0.267937	0.791382	-0.211977	0.863353	0.398566	0.883626	-0.0766125	0.948282	0.817976	0.998659	0.0466309	1.03285	0.359043	0.863801	-0.25559	0.837645	0.216716	0.894136	-0.302221	0.811003	0.133195	0.726247	-0.262381	0.833711	0.134328	1	-0.487989	0.713018	31.7698	31.4587	31.4857	31.9665	31.2714	31.3845	31.4064	31.6502	31.7143	31.36	31.4491
Q920I9	WD repeat-containing protein 7	Wdr7	0.958079	0.993246	-0.00285034	0.998026	0.463435	0.969898	-0.0584007	0.960328	0.445282	0.943191	-0.0555504	0.962227	0.0314853	0.773538	-0.104612	0.930055	0.920961	0.997718	0.00863775	1.00601	0.907268	0.992636	-0.0142047	0.990202	0.85913	1	-0.0228424	0.984292	0.980637	1	-0.0021979	0.998478	0.590192	1	0.079572	1.0567	32.2157	32.3172	32.3154	32.1629	32.272	32.2366	32.3688	32.1478	32.2529	32.3519	32.3659
P35438	Glutamate receptor ionotropic, NMDA 1	Grin1	0.187299	0.775616	0.224713	1.16854	0.402277	0.895167	0.223231	1.16734	0.995022	0.999378	-0.00148239	0.998973	0.329942	0.659099	-0.40988	0.752686	0.570042	1	0.132706	1.09635	0.253962	0.760695	0.403488	1.3227	0.420073	0.912504	0.270782	1.20646	0.367341	0.833863	-0.226725	0.854572	0.342786	1	0.453937	1.36977	32.5732	32.5258	32.8521	32.326	32.3298	32.0873	32.6453	32.1439	32.5166	32.3211	32.9157
P63213	Guanine nucleotide-binding protein G(I)/G(S)/G(O) subunit gamma-2	Gng2	0.325158	0.90323	0.0755457	1.05376	0.299297	0.939743	0.0968317	1.06942	0.794497	0.977031	0.021286	1.01486	0.22893	0.837458	-0.0971699	0.934865	0.661275	1	0.0512199	1.03614	0.220671	0.900761	0.151477	1.11071	0.422923	0.979375	0.100257	1.07196	0.939477	1	-0.00911331	0.993703	0.16539	1	0.188313	1.13943	32.3102	32.1864	32.3654	32.1306	32.1251	32.2091	32.3085	32.1944	32.0258	32.2261	32.3024
Q63810	Calcineurin subunit B type 1	Ppp3r1	0.427214	0.842885	0.130691	1.09482	0.293946	0.889958	0.198433	1.14745	0.692163	0.949433	0.0677422	1.04808	0.566221	0.810994	-0.217915	0.859807	0.997216	1	0.000689189	1.00048	0.279156	0.826943	0.258869	1.19654	0.194	0.899193	0.25818	1.19597	0.0673044	0.681419	-0.365576	0.776159	0.730898	1	0.110518	1.07962	32.2386	32.5127	32.4039	31.9941	31.9807	31.8939	32.4691	32.3084	32.1311	31.8381	32.4723
E9Q7L0	Transket_pyr domain-containing protein	Ogdhl	0.224334	0.83701	-0.110458	0.926294	0.285697	0.901187	-0.160513	0.894707	0.729756	0.956592	-0.0500549	0.9659	0.470446	0.842865	0.122696	1.08877	0.585059	1	-0.0647875	0.956086	0.318173	0.864627	-0.23001	0.852629	0.501472	0.965383	-0.165222	0.891791	0.51368	0.926749	0.112739	1.08128	0.557761	1	-0.175179	0.885658	32.2134	32.2624	32.2394	32.1452	32.4931	32.2932	32.1544	32.485	32.2019	32.3671	32.1739
P62983;A0A0A6YW67;P62984;P0CG49;P0CG50	Ubiquitin-40S ribosomal protein S27a;Predicted pseudogene 8797	Rps27a;Gm8797	0.670093	0.963073	-0.0230337	0.984161	0.00316377	0.843947	0.179952	1.13285	0.0025223	0.67911	0.202985	1.15108	0.00308833	0.384098	0.281942	1.21583	0.600126	0.999632	0.0255292	1.01785	0.0490584	0.827022	0.175877	1.12965	0.0417423	0.903838	0.150347	1.10984	0.00959704	0.780673	0.151441	1.11068	0.768546	1	0.019846	1.01385	32.3518	32.2692	32.2562	32.3857	32.4152	32.444	32.2751	32.3107	32.2487	32.154	32.1414
P55066	Neurocan core protein	Ncan	0.703791	0.976405	0.0142231	1.00991	0.0875414	0.825465	0.262189	1.1993	0.0667041	0.6933	0.247966	1.18753	0.0749702	0.831855	0.0859241	1.06137	0.132715	1	0.0655568	1.04649	0.0429962	0.540996	0.421551	1.33937	0.0701053	0.830149	0.355995	1.27987	0.148999	0.932581	0.071214	1.0506	0.161485	1	0.341284	1.26688	32.3255	32.3885	32.4593	32.4028	32.4373	32.4078	32.3759	32.2969	32.3811	32.3165	32.3567
Q9D855	Cytochrome b-c1 complex subunit 7	Uqcrb	0.188304	0.892597	0.07257	1.05159	0.170688	0.902153	0.133034	1.0966	0.412962	0.936756	0.0604637	1.0428	0.850077	0.964123	0.0373058	1.0262	0.127378	1	0.093413	1.06689	0.100757	0.842182	0.169315	1.12452	0.371957	0.980206	0.0759023	1.05402	0.307456	0.963565	-0.0507113	0.96546	0.943316	1	-0.0121148	0.991638	32.1515	32.3901	32.299	32.259	32.15	32.1938	32.2712	32.227	32.1696	31.962	32.3072
Q8R366	Immunoglobulin superfamily member 8	Igsf8	0.215874	0.84309	-0.103658	0.93067	0.000331859	0.590413	-0.293473	0.815935	0.0100941	0.70912	-0.189816	0.876718	0.0819152	0.795282	-0.104497	0.930129	0.68297	1	-0.0472953	0.967749	0.0145978	0.605742	-0.29399	0.815643	0.0441332	0.86805	-0.246695	0.842825	0.340286	0.886667	0.123734	1.08955	0.524464	1	-0.0184631	0.987284	31.8232	31.7394	31.8366	31.976	31.9908	32.0525	31.7327	31.9914	31.9697	32.1181	32.1343
P49312	Heterogeneous nuclear ribonucleoprotein A1	Hnrnpa1	0.197265	0.820363	0.143929	1.10491	0.616874	0.981537	-0.0417354	0.971486	0.0455198	0.76288	-0.185664	0.879244	0.123192	0.606868	-0.282572	0.822124	0.891656	0.996467	0.0141595	1.00986	0.381751	0.911495	-0.1069	0.928581	0.220546	0.948287	-0.121059	0.919512	0.12796	0.75681	-0.212539	0.863017	0.606646	1	-0.0510267	0.965249	32.2992	32.1586	32.2442	31.9578	32.0016	31.7854	32.0178	32.1168	32.1835	32.194	32.1582
Q8BLQ9	Cell adhesion molecule 2	Cadm2	0.0400484	0.777255	-0.157088	0.896833	0.35934	0.918675	-0.131791	0.912698	0.841557	0.978098	0.0252975	1.01769	0.579639	0.895466	-0.0749578	0.94937	0.0851556	0.969553	-0.200642	0.870163	0.601932	0.940041	-0.108508	0.927547	0.675272	0.976062	0.0921345	1.06595	0.793685	0.992259	-0.0297085	0.979618	0.629852	1	0.137384	1.09991	31.9134	31.789	31.72	31.8513	31.9362	31.9791	31.9137	32.1464	31.9021	32.145	31.9203
Q05920	Pyruvate carboxylase, mitochondrial	Pc	0.258038	0.934709	-0.0530646	0.963887	0.19157	0.964255	-0.0600616	0.959223	0.859613	0.992907	-0.00699692	0.995162	0.557891	0.936043	0.0391407	1.0275	0.419736	1	-0.0611591	0.958494	0.100447	0.909257	-0.0989145	0.933735	0.503323	0.99544	-0.0377553	0.974169	0.994146	1	-0.000525792	0.999636	0.165049	1	-0.0774218	0.94775	32.063	32.0503	31.9449	32.0993	32.1054	32.0789	32.052	32.1932	32.0328	31.9984	32.1076
Q9R111	Guanine deaminase	Gda	0.0252762	0.641783	0.275372	1.21031	0.216113	0.947326	0.0822567	1.05867	0.0816576	0.765668	-0.193115	0.874715	0.847523	0.974205	-0.0202198	0.986082	0.0108902	0.77028	0.404352	1.32349	0.285815	0.911491	0.0959727	1.06879	0.0517878	0.841859	-0.308379	0.807549	0.0842642	0.674311	0.281462	1.21543	0.957851	1	-0.00669734	0.995369	32.298	32.4051	32.3746	32.311	32.2413	32.2401	31.9971	31.7956	32.085	32.1682	32.3536
O35737	Heterogeneous nuclear ribonucleoprotein H	Hnrnph1	0.314585	0.927317	-0.0596623	0.959489	0.744957	0.989171	-0.0326417	0.977629	0.754964	0.975371	0.0270206	1.01891	0.864992	0.964721	0.0394411	1.02772	0.43704	1	-0.0602792	0.959078	0.73078	0.988499	-0.0415389	0.971618	0.853309	1	0.0187403	1.01307	0.844692	0.995486	-0.0162601	0.988793	0.850736	1	-0.0369609	0.974706	32.075	32.09	32.2156	31.99	32.2351	32.05	32.1098	32.1747	32.1919	32.2857	31.9206
Q99P72	Reticulon-4	Rtn4	0.220231	0.936079	-0.0499548	0.965967	0.395533	0.970716	-0.0622496	0.95777	0.83126	0.987934	-0.0122948	0.991514	0.643478	0.959737	-0.0264969	0.981801	0.166633	1	-0.0779101	0.947429	0.485216	0.942736	-0.0807368	0.945575	0.978282	0.997102	-0.00282669	0.998043	0.671789	0.990347	-0.0170015	0.988285	0.96114	1	0.00666873	1.00463	32.1494	31.988	32.0707	32.1357	32.164	32.0875	32.114	32.1742	32.14	32.183	32.1215
Q99NE5	Regulating synaptic membrane exocytosis protein 1	Rims1	0.250633	0.819334	0.1558	1.11404	0.806558	0.989065	0.0381598	1.0268	0.462945	0.891613	-0.11764	0.921694	0.177565	0.555241	-0.379865	0.76851	0.769572	1	0.0546074	1.03858	0.589385	0.935893	0.111784	1.08056	0.805018	0.998668	0.0571766	1.04043	0.339111	0.831115	-0.211087	0.863886	0.433965	1	0.225955	1.16955	32.2655	32.2682	32.3247	32.0025	31.963	31.9025	32.3912	31.8955	32.1449	32.1293	32.496
P15864	Histone H1.2	H1-2	0.773192	0.953671	0.0575187	1.04067	0.236686	0.891499	0.186676	1.13814	0.480806	0.886873	0.129157	1.09365	0.272123	0.692872	0.282663	1.21644	0.552451	1	0.137716	1.10016	0.46135	0.905138	0.164536	1.12081	0.916964	1	0.0268192	1.01876	0.253559	0.724615	0.377778	1.29934	0.606166	1	0.121934	1.08819	32.4518	31.934	32.3054	32.265	32.2203	32.596	31.7614	32.3644	31.9654	32.1383	32.1128
P62482	Voltage-gated potassium channel subunit beta-2	Kcnab2	0.0933814	0.82586	-0.117665	0.921678	0.405945	0.973466	0.0587976	1.0416	0.0482745	0.771024	0.176462	1.13011	0.832574	0.975672	-0.0179825	0.987613	0.0552273	0.968919	-0.18523	0.879509	0.0832878	0.898882	0.120862	1.08738	0.0189936	0.800758	0.306092	1.23635	0.237314	0.863945	-0.134327	0.911095	0.084459	1	0.189747	1.14056	32.1979	32.1403	32.184	32.1035	32.2412	32.1458	32.458	32.262	32.2635	32.2692	32.1537
P56135	ATP synthase subunit f, mitochondrial	Atp5mf	0.0438761	0.641014	-0.296033	0.814489	0.00308955	0.822178	-0.195968	0.872987	0.361022	0.893062	0.100064	1.07182	0.00742614	0.337265	0.366697	1.2894	0.203813	1	-0.124849	0.9171	0.0301507	0.782853	-0.20254	0.869019	0.296173	0.976273	-0.0776908	0.947573	0.0153772	0.706649	0.390186	1.31056	0.250507	1	-0.0542018	0.963127	31.8419	31.9232	31.7958	31.9879	32.4312	32.4035	32.0539	31.9127	32.1149	32.0793	32.022
G5E8K5	Ankyrin-3	Ank3	0.362178	0.905136	-0.0771399	0.947935	0.0200844	0.759345	-0.254633	0.8382	0.0833283	0.779151	-0.177493	0.884238	0.193245	0.672199	-0.251444	0.840055	0.0840561	1	-0.122929	0.918321	0.100847	0.771488	-0.251122	0.840243	0.319177	0.960551	-0.128192	0.914977	0.116341	0.781261	-0.193466	0.874503	0.673682	1	-0.070214	0.952497	31.6471	31.8633	31.7158	31.7415	31.8107	31.5953	31.949	31.8897	31.8507	32.0276	31.8813
Q8BH44	Coronin-2B	Coro2b	0.0293788	0.697595	0.244448	1.18464	0.763482	0.996118	-0.0205063	0.985887	0.0129958	0.616429	-0.264954	0.832225	0.0658752	0.387396	-0.428184	0.743197	0.211713	1	0.171833	1.12649	0.85123	0.992707	0.0156988	1.01094	0.21149	0.91395	-0.156134	0.897427	0.326603	0.856046	-0.16027	0.894858	0.275592	1	0.11178	1.08056	32.2279	32.3075	32.1927	32.0815	31.9417	31.7819	31.9445	31.9096	32.2122	32.2064	32.3736
Q9D415	Disks large-associated protein 1	Dlgap1	0.135685	0.821417	0.133731	1.09713	0.401162	0.895606	0.221475	1.16593	0.698758	0.941596	0.0877445	1.06271	0.123953	0.615001	-0.278528	0.824432	0.694215	1	0.0392545	1.02758	0.333361	0.814672	0.371181	1.29341	0.373634	0.892322	0.331926	1.25869	0.105937	0.815296	-0.162055	0.893751	0.373706	1	0.448399	1.36453	32.4603	32.3546	32.4723	32.1983	32.1856	32.0952	32.3972	32.2704	32.2397	32.3204	32.5175
P20065	Thymosin beta-4	Tmsb4x	0.489835	0.854695	0.139177	1.10128	0.16815	0.875269	0.236567	1.17819	0.629705	0.925393	0.09739	1.06984	0.45901	0.810243	-0.155177	0.898022	0.826781	0.999225	-0.0536512	0.963495	0.423234	0.898672	0.212117	1.15839	0.407876	0.91366	0.265768	1.20228	0.237382	0.697919	-0.408313	0.753504	0.966591	1	0.0126317	1.00879	32.4939	32.2147	32.5996	32.3133	31.8791	32.1632	32.6309	32.6253	32.0324	32.0819	32.2708
Q9QVP9	Protein-tyrosine kinase 2-beta	Ptk2b	0.387273	0.93111	-0.0585552	0.960225	0.55422	0.966825	0.0765808	1.05452	0.234945	0.844564	0.135136	1.0982	0.892385	0.974324	0.025322	1.01771	0.833156	1	-0.0216103	0.985133	0.252098	0.871608	0.186735	1.13819	0.190687	0.894312	0.208345	1.15536	0.645054	0.98322	0.0398229	1.02799	0.337668	1	0.222846	1.16703	32.1696	32.2901	32.3611	32.1096	32.3224	32.3077	32.3803	32.1714	32.2739	32.455	32.1245
Q9Z1S5	Neuronal-specific septin-3	Septin3	0.556372	0.950462	0.0354477	1.02487	0.852476	0.993372	0.0179073	1.01249	0.821642	0.983291	-0.0175404	0.987916	0.0854725	0.747324	0.131217	1.09522	0.667608	0.997985	0.028897	1.02023	0.488138	0.940895	-0.087815	0.940947	0.33804	0.962748	-0.116712	0.922287	0.156246	0.912356	0.0831534	1.05933	0.309046	1	-0.164776	0.892067	32.151	31.8941	32.0767	32.0045	32.0298	32.0622	32.0204	31.9617	31.9064	31.9525	31.8771
P61161	Actin-related protein 2	Actr2	0.573384	0.95116	0.0360378	1.02529	0.271767	0.886101	0.22463	1.16848	0.297781	0.813675	0.188592	1.13965	0.229556	0.783266	-0.13014	0.913743	0.800432	1	-0.0214869	0.985217	0.17668	0.722763	0.379594	1.30098	0.162472	0.859603	0.40108	1.3205	0.314804	0.901425	-0.104191	0.930326	0.244443	1	0.427029	1.34446	32.2618	32.2105	32.2782	32.1066	32.0714	32.16	32.3438	32.1576	32.1584	32.1839	32.3078
P80318	T-complex protein 1 subunit gamma	Cct3	0.168037	0.939666	-0.0407553	0.972146	0.67569	0.993057	0.0119265	1.0083	0.150361	0.934458	0.0526817	1.03719	0.131769	0.786915	0.114428	1.08255	0.580358	0.999721	-0.0138359	0.990456	0.947143	0.997579	-0.00231806	0.998395	0.787065	1	0.0115178	1.00802	0.0782739	0.913884	0.0785923	1.05599	0.684501	1	-0.0243174	0.983286	32.0954	32.0711	32.0797	32.0812	32.1631	32.1765	32.1368	32.0696	32.0672	32.0096	32.1011
Q60598	Src substrate cortactin	Cttn	0.865085	0.987149	0.00985088	1.00685	0.222334	0.939446	0.0904428	1.0647	0.208605	0.907549	0.080592	1.05745	0.864678	0.985569	-0.0111389	0.992309	0.64387	1	-0.0307325	0.978923	0.109245	0.90208	0.111013	1.07999	0.129118	0.915698	0.141746	1.10324	0.961053	1	0.00428581	1.00298	0.101322	1	0.157171	1.1151	32.2716	32.1247	32.1288	32.0536	32.1841	32.0907	32.1883	32.0201	32.1909	32.1824	32.1146
Q9CWS0	N(G),N(G)-dimethylarginine dimethylaminohydrolase 1	Ddah1	0.855634	0.985958	-0.0127157	0.991225	0.245848	0.936055	0.0961229	1.0689	0.233491	0.874003	0.108839	1.07836	0.0670294	0.51805	0.287372	1.22041	0.457213	1	0.062006	1.04392	0.619038	0.974713	0.0518227	1.03657	0.932787	0.997618	-0.0101833	0.992966	0.221342	0.854227	0.150769	1.11016	0.320365	1	-0.146786	0.90326	32.0325	32.1211	32.0255	32.1239	32.2367	32.1211	31.9485	32.1637	31.9723	31.9445	31.8386
Q923T9	Calcium/calmodulin-dependent protein kinase type II subunit gamma	Camk2g	0.112599	0.77653	0.202335	1.15056	0.525139	0.943652	-0.10854	0.927526	0.0679693	0.640922	-0.310875	0.806153	0.240519	0.722005	-0.206936	0.866375	0.345571	1	0.183476	1.13562	0.417955	0.895685	-0.196692	0.872549	0.166057	0.863379	-0.380168	0.768348	0.593102	0.949335	-0.0981296	0.934243	0.367891	1	-0.271361	0.828537	32.0327	32.2584	32.1977	31.8868	31.827	31.8384	31.6773	32.034	32.0812	32.1648	31.9144
Q9QYB8	Beta-adducin	Add2	0.015461	0.826206	-0.102862	0.931184	0.453664	0.944262	0.0987047	1.07081	0.098767	0.765072	0.201566	1.14995	0.124786	0.758704	0.129916	1.09423	0.0606284	1	-0.0542018	0.963127	0.336575	0.896509	0.195131	1.14483	0.236513	0.893178	0.249333	1.18866	0.128159	0.964908	0.0454979	1.03204	0.530784	1	0.164915	1.1211	31.9033	32.05	32.0138	32.0115	32.1277	32.1219	32.0473	32.1042	32.0863	31.9442	32.0456
P35279	Ras-related protein Rab-6A	Rab6a	0.294098	0.913041	0.0689236	1.04893	0.181479	0.94165	0.0848679	1.06059	0.782526	0.983793	0.0159443	1.01111	0.54079	0.930229	0.0449238	1.03163	0.469775	1	0.0719255	1.05112	0.486762	0.95801	0.0685501	1.04866	0.973143	0.99817	-0.00337537	0.997663	0.760463	0.993737	0.0320778	1.02248	0.864841	1	-0.0162214	0.988819	32.0687	32.1262	32.0433	31.9187	31.9336	32.0455	32.0782	31.9477	31.8466	31.9193	31.97
Q9QZQ8	Core histone macro-H2A.1	Macroh2a1	0.698822	0.938611	-0.0659525	0.955314	0.633163	0.972577	0.0769251	1.05477	0.455177	0.874585	0.142878	1.10411	0.128517	0.541172	0.335577	1.26188	0.657905	1	0.0505492	1.03566	0.776137	0.980361	0.0649605	1.04606	0.954499	0.997817	0.0144113	1.01004	0.06056	0.652342	0.468316	1.38349	0.635615	1	0.14715	1.10738	32.3191	32.0545	32.0472	32.0057	32.5666	32.3405	32.104	32.0754	31.7764	32.189	32.0469
Q9D8N0	Elongation factor 1-gamma	Eef1g	0.477362	0.956626	0.0248709	1.01739	0.0264369	0.91814	0.08486	1.06058	0.108575	0.924714	0.0599892	1.04246	0.203556	0.798854	0.116457	1.08407	0.111001	1	0.0674082	1.04783	0.0494536	0.910144	0.0897522	1.06419	0.462888	1	0.022344	1.01561	0.0479135	0.88744	0.0897884	1.06421	0.938552	0.999848	-0.0043246	0.997007	32.1285	32.1669	32.1049	32.1932	32.1646	32.1901	32.1269	32.0601	32.0757	31.9997	32.1221
Q9R1Q8	Transgelin-3	Tagln3	0.850727	0.987006	0.00993137	1.00691	0.195847	0.943221	0.0842039	1.0601	0.192143	0.908725	0.0742725	1.05283	0.644649	0.953715	-0.0323563	0.977822	0.917479	0.998823	-0.00756709	0.994769	0.145161	0.901849	0.137791	1.10022	0.100083	0.911158	0.145358	1.10601	0.283474	0.933507	-0.0782636	0.947197	0.29454	1	0.0994511	1.07137	32.1044	32.2138	32.2138	32.0513	32.0546	32.1233	32.2028	32.2154	32.0834	32.0719	32.1707
Q60668	Heterogeneous nuclear ribonucleoprotein D0	Hnrnpd	0.909581	0.987705	-0.00995216	0.993125	0.796063	0.993214	-0.0184971	0.987261	0.899379	0.991626	-0.00854492	0.994095	0.0307581	0.722118	0.135963	1.09883	0.901634	0.99822	0.0121555	1.00846	0.328654	0.917592	-0.0927283	0.937748	0.287451	0.965555	-0.104884	0.92988	0.144925	0.813574	0.169643	1.12478	0.389543	1	-0.0712039	0.951843	32.1387	31.8667	31.9209	32.0797	32.1006	32.1259	31.827	31.9458	32.0579	31.9981	31.9564
Q9JJV2	Profilin-2	Pfn2	0.747545	0.957691	-0.0324679	0.977746	0.44403	0.962315	-0.0728946	0.950729	0.64011	0.956743	-0.0404266	0.972367	0.972239	0.991435	0.00575542	1.004	0.679621	1	-0.03147	0.978423	0.399976	0.914024	-0.102685	0.931298	0.511523	0.976363	-0.0712147	0.951836	0.278138	0.848042	0.156147	1.11431	0.555003	1	0.0791772	1.05642	32.1935	31.9053	32.0655	31.8721	32.2795	31.991	32.0406	31.9872	31.9096	32.1555	32.1035
Q9WV55	Vesicle-associated membrane protein-associated protein A	Vapa	0.319237	0.908297	0.0716061	1.05089	0.353864	0.968905	0.0593651	1.04201	0.7973	0.986573	-0.012241	0.991551	0.906457	0.98716	0.00819492	1.0057	0.908097	0.999065	0.00965627	1.00672	0.815886	0.992583	-0.0162086	0.988828	0.704367	1	-0.0258649	0.982232	0.610134	0.977555	-0.0476688	0.967498	0.146743	1	-0.0817286	0.944925	32.1438	31.8679	31.9865	32.0622	31.9764	31.8534	31.9445	32.0647	31.8785	31.9109	31.9025
P11983	T-complex protein 1 subunit alpha	Tcp1	0.689863	0.972506	0.0173161	1.01207	0.427242	0.979231	0.0401318	1.02821	0.620578	0.975435	0.0228157	1.01594	0.760896	0.975978	0.0155764	1.01086	0.453722	1	0.0496877	1.03504	0.294202	0.931914	0.0773296	1.05506	0.719499	1	0.0276419	1.01934	0.598135	0.98486	0.0364799	1.02561	0.569973	1	0.0485455	1.03422	31.9293	32.0336	32.0387	31.9289	31.9888	31.9856	32.0391	31.9393	31.8737	31.9269	32.0163
Q9D2G2	Dihydrolipoyllysine-residue succinyltransferase component of 2-oxoglutarate dehydrogenase complex, mitochondrial	Dlst	0.18092	0.867568	-0.0875412	0.941125	0.0588183	0.903713	-0.12123	0.919404	0.374535	0.95705	-0.0336884	0.97692	0.78554	0.98128	0.014163	1.00987	0.851131	0.997752	-0.011865	0.99181	0.195775	0.925863	-0.0774542	0.947729	0.261955	0.98077	-0.0655893	0.955555	0.282987	0.938198	0.0723368	1.05142	0.886792	1	-0.00741545	0.994873	31.7744	32.0363	31.9558	31.8921	32.06	32.0311	32.0506	31.9634	31.9057	32.0747	31.9882
Q9WUC3	Lymphocyte antigen 6H	Ly6h	0.0701966	0.590617	0.399389	1.31895	0.356308	0.891613	-0.267664	0.830663	0.0466987	0.455845	-0.667054	0.629792	0.334936	0.580457	-0.778811	0.582847	0.294356	0.980167	0.222525	1.16677	0.173575	0.723954	-0.370023	0.77377	0.0937844	0.707188	-0.592548	0.66317	0.135161	0.688122	-0.494476	0.709819	0.598205	1	-0.308213	0.807641	31.8493	32.0654	31.8106	31.9229	31.0718	31.3601	31.5921	31.4951	32.0442	31.3935	32.5961
P47708	Rabphilin-3A	Rph3a	0.117846	0.810101	-0.138686	0.908346	0.598379	0.972956	-0.0743772	0.949752	0.651022	0.948635	0.0643089	1.04558	0.0237841	0.595263	-0.21844	0.859494	0.0312647	0.922244	-0.227838	0.853914	0.900656	0.99311	0.0249704	1.01746	0.274057	0.895574	0.252808	1.19152	0.0829656	0.722206	-0.230702	0.85222	0.394889	1	0.240546	1.18144	31.8007	31.8364	31.7915	31.8118	31.791	31.8298	32.1381	32.0771	31.9081	32.0005	32.0571
Q9JKK7	Tropomodulin-2	Tmod2	0.860508	0.987913	0.0102521	1.00713	0.760089	0.995216	-0.0211886	0.98542	0.632314	0.967181	-0.0314407	0.978443	0.537437	0.877702	-0.0969219	0.935026	0.510032	1	-0.0402705	0.972473	0.717523	0.991775	-0.0280571	0.98074	0.815576	1	0.0122134	1.0085	0.00427946	0.75689	-0.154232	0.898611	0.720995	1	-0.0450967	0.969225	31.8451	31.9127	31.7862	31.9704	31.7917	31.7599	31.9408	31.9059	31.9435	31.7423	32.0031
P09671	Superoxide dismutase [Mn], mitochondrial	Sod2	0.587999	0.954293	0.0301422	1.02111	0.960477	0.995275	-0.00551262	0.996186	0.708152	0.963905	-0.0356548	0.975589	0.985289	0.996761	0.0025568	1.00177	0.765109	0.996409	0.025809	1.01805	0.831015	0.992622	-0.0353203	0.975815	0.705783	0.990542	-0.0611293	0.958514	0.658705	0.986497	0.0320822	1.02249	0.887139	1	-0.0316038	0.978332	32.1861	32.0878	32.2377	32.0268	32.121	32.1264	32.1439	32.141	31.9899	31.9983	32.244
Q8R071	Inositol-trisphosphate 3-kinase A	Itpka	0.085716	0.837369	-0.0976379	0.934562	0.903513	0.992233	0.021191	1.0148	0.438714	0.88864	0.118829	1.08585	0.844682	0.973855	-0.0210953	0.985484	0.301192	1	-0.0829506	0.944125	0.602894	0.929317	0.129161	1.09366	0.391914	0.917524	0.212112	1.15838	0.159386	0.937508	0.0671644	1.04766	0.379291	1	0.300371	1.23146	31.9065	31.733	31.9508	31.8895	32.0247	31.991	31.9037	31.9272	31.9913	32.1223	31.9356
Q9CVB6	Actin-related protein 2/3 complex subunit 2	Arpc2	0.892235	0.987335	-0.0108235	0.992526	0.511945	0.946697	0.101155	1.07263	0.426383	0.890221	0.111978	1.08071	0.214193	0.719611	-0.190466	0.876323	0.640476	1	-0.0403913	0.972391	0.17498	0.790012	0.273216	1.2085	0.125174	0.870902	0.313608	1.24281	0.200378	0.847123	-0.15092	0.900676	0.181546	1	0.353153	1.27735	31.933	32.1072	32.1285	31.9331	31.8587	32.0328	32.1953	32.0263	32.0683	32.0757	32.1967
P14211	Calreticulin	Calr	0.427194	0.951482	0.0284184	1.01989	0.00899355	0.884432	0.146614	1.10697	0.00766541	0.817347	0.118196	1.08538	0.281496	0.842486	0.0962143	1.06896	0.586694	0.995385	0.0207418	1.01448	0.00700484	0.825518	0.153592	1.11234	0.00921225	0.908767	0.132851	1.09646	0.366536	0.97753	0.0397854	1.02796	0.211327	1	0.0764217	1.0544	32.2731	32.2142	32.1281	32.1938	32.2269	32.1686	32.2049	32.1289	32.1401	32.1606	32.0425
Q91WS0	CDGSH iron-sulfur domain-containing protein 1	Cisd1	0.637854	0.950979	0.0371819	1.02611	0.130801	0.902364	0.115507	1.08336	0.331404	0.912191	0.0783253	1.05579	0.755713	0.931117	0.0629339	1.04459	0.362709	1	0.0787627	1.05611	0.110641	0.848538	0.167349	1.12299	0.358968	0.979574	0.0885862	1.06333	0.757421	0.985179	0.0450897	1.03175	0.560904	1	0.070742	1.05026	31.9829	32.1798	32.0284	32.023	31.8943	32.1925	32.0974	31.9	31.9975	31.8857	32.0752
O54991	Contactin-associated protein 1	Cntnap1	0.03361	0.776888	-0.157971	0.896285	0.287234	0.921748	-0.115236	0.923231	0.622916	0.956502	0.0427349	1.03006	0.690615	0.96511	-0.0229387	0.984226	0.0282832	0.96494	-0.14773	0.90267	0.690159	0.973499	-0.0612125	0.958458	0.577674	0.978073	0.0865173	1.0618	0.12244	0.883351	-0.100041	0.933006	0.962062	1	0.00941499	1.00655	31.7002	31.9565	31.8966	31.8507	31.9177	31.9801	32.054	32.1008	31.992	32.0108	31.933
Q6P9K8	Caskin-1	Caskin1	0.200265	0.850115	0.0964664	1.06915	0.131736	0.92014	0.0958267	1.06868	0.992829	0.999986	-0.000639725	0.999557	0.940847	0.986238	0.0124207	1.00865	0.446611	1	0.0436236	1.0307	0.658174	0.989919	0.034277	1.02404	0.903664	0.997316	-0.00934664	0.993542	0.556524	0.95248	-0.079113	0.946639	0.302271	1	-0.10088	0.932464	32.2115	32.1959	32.1086	32.0755	32.1513	31.8566	32.053	32.1571	32.0391	31.9758	32.0073
O08788	Dynactin subunit 1	Dctn1	0.242401	0.893351	-0.0755732	0.948965	0.452695	0.944291	-0.0980154	0.934317	0.848849	0.979324	-0.0224422	0.984565	0.322368	0.802408	0.129839	1.09417	0.715607	0.999046	-0.0313943	0.978474	0.428173	0.905366	-0.155357	0.89791	0.531486	0.976826	-0.123963	0.917663	0.428995	0.935813	0.0840009	1.05995	0.509612	1	-0.169801	0.888965	31.9673	32.0807	32.0313	31.9167	32.07	32.1799	31.9391	32.1587	32.0251	32.0782	31.912
P70349	Histidine triad nucleotide-binding protein 1	Hint1	0.619934	0.959503	-0.0241329	0.983411	0.545269	0.980361	0.0402519	1.02829	0.277384	0.926573	0.0643848	1.04564	0.980419	0.995948	0.00282574	1.00196	0.523354	1	-0.0447019	0.96949	0.513908	0.962372	0.0607224	1.04299	0.230891	0.96284	0.105424	1.07581	0.32777	0.954224	-0.0648041	0.956075	0.752762	1	0.0377944	1.02654	32.0345	31.9494	32.1173	32.1012	31.9928	32.0789	32.1596	32.0381	32.1042	31.9405	32.1255
O08532	Voltage-dependent calcium channel subunit alpha-2/delta-1	Cacna2d1	0.671473	0.931642	-0.0924721	0.937914	0.845683	0.988461	-0.0545284	0.962909	0.891088	0.976976	0.0379436	1.02665	0.513285	0.758219	-0.311965	0.805544	0.40149	0.996896	-0.243691	0.844582	0.944222	0.992334	0.0275249	1.01926	0.51545	0.934981	0.271216	1.20682	0.197451	0.672339	-0.44229	0.735965	0.799006	1	0.140891	1.10259	31.99	32.3878	32.0994	31.7912	31.7689	32.0195	32.7228	32.1841	32.1026	31.8306	32.5817
Q9D0E1	Heterogeneous nuclear ribonucleoprotein M	Hnrnpm	0.15882	0.789477	0.182712	1.13502	0.654455	0.979359	0.0503208	1.0355	0.246457	0.84413	-0.132391	0.912318	0.0517414	0.472919	-0.294015	0.815629	0.494115	1	0.0923042	1.06607	0.708241	0.970147	0.0676619	1.04802	0.865599	1	-0.0246423	0.983064	0.0382852	0.678031	-0.291493	0.817056	0.901467	1	-0.0221202	0.984784	32.128	32.4091	32.0271	32.262	31.7852	31.9127	32.0701	32.1092	32.242	32.1708	32.1151
Q61753	D-3-phosphoglycerate dehydrogenase	Phgdh	0.237614	0.837639	-0.113885	0.924096	0.310728	0.895533	-0.234221	0.850144	0.565599	0.909907	-0.120336	0.919974	0.415357	0.824288	0.128455	1.09312	0.714339	1	-0.045859	0.968713	0.355473	0.831145	-0.332055	0.794404	0.437518	0.910599	-0.286196	0.820061	0.407989	0.885639	0.1443	1.10519	0.558961	1	-0.270351	0.829118	31.8207	31.9356	31.774	31.876	32.1328	31.9712	31.6946	32.0242	32.0044	32.0203	31.8268
Q9QXZ0	Microtubule-actin cross-linking factor 1	Macf1	0.480042	0.91855	-0.0768523	0.948124	0.383985	0.954917	-0.0771506	0.947928	0.997618	0.999828	-0.000298309	0.999793	0.90974	0.985663	-0.0164232	0.988681	0.457783	1	-0.124481	0.917334	0.338782	0.9099	-0.114029	0.924004	0.944625	0.997331	0.0104516	1.00727	0.485925	0.899452	-0.133036	0.91191	0.439598	1	-0.106161	0.929057	31.7152	31.7402	31.5912	31.8813	31.6761	31.7819	32.104	31.6776	31.8046	31.6287	31.8622
P80316	T-complex protein 1 subunit epsilon	Cct5	0.398329	0.93917	-0.0445075	0.969621	0.356057	0.973221	0.0567929	1.04015	0.0891262	0.860578	0.1013	1.07274	0.255735	0.809879	0.114906	1.0829	0.954729	0.997131	0.0040582	1.00282	0.267361	0.909756	0.096288	1.06902	0.277408	0.972823	0.0922298	1.06602	0.270743	0.932445	0.0807683	1.05758	0.569943	1	0.0580918	1.04109	31.8292	31.9913	31.844	31.8474	31.9736	31.9683	31.9694	31.8925	31.8086	31.7832	31.9289
Q61699	Heat shock protein 105 kDa	Hsph1	0.841523	0.985904	-0.0116743	0.991941	0.974997	0.999806	-0.00159512	0.998895	0.804756	0.990369	0.0100792	1.00701	0.775477	0.973572	0.0186434	1.01301	0.628165	0.998557	-0.0277138	0.980974	0.430423	0.991261	-0.023344	0.983949	0.932673	0.999063	0.00436974	1.00303	0.344014	0.945443	0.072574	1.05159	0.236579	1	0.0583003	1.04124	32.057	31.8905	31.9096	31.8301	31.9475	32.0065	31.9869	31.9031	31.8234	31.9093	32.0074
Q9D0M5	Dynein light chain 2, cytoplasmic	Dynll2	0.593016	0.947652	-0.0458874	0.968694	0.933589	0.995597	-0.00542603	0.996246	0.567943	0.956045	0.0404613	1.02844	0.411832	0.877132	0.082037	1.05851	0.960516	0.996762	-0.00458908	0.996824	0.911451	0.997135	0.00815519	1.00567	0.85139	1	0.0127443	1.00887	0.129938	0.791029	0.182266	1.13466	0.112667	1	0.112973	1.08145	32.0531	31.8499	32.0544	31.8757	32.1731	32.0539	32.0463	31.8948	31.8527	31.9785	32.0845
P08113	Endoplasmin	Hsp90b1	0.59143	0.957362	0.0271091	1.01897	0.129985	0.902641	0.132389	1.09611	0.108671	0.853086	0.10528	1.0757	0.686274	0.936488	0.0455103	1.03205	0.555523	1	0.0479698	1.03381	0.11377	0.829544	0.193096	1.14321	0.118577	0.914128	0.145126	1.10583	0.679652	0.990068	0.0176207	1.01229	0.37488	1	0.117237	1.08466	32.115	32.2336	32.0335	32.2437	32.1353	32.1446	32.1124	32.1782	32.0763	32.1917	31.9972
P97315	Cysteine and glycine-rich protein 1	Csrp1	0.0866254	0.775894	-0.183926	0.880304	0.369302	0.919906	-0.134716	0.910849	0.736817	0.956612	0.04921	1.0347	0.498792	0.828218	0.148089	1.1081	0.259159	0.999655	-0.185766	0.879182	0.322556	0.886957	-0.202476	0.869058	0.942055	0.998091	-0.0167096	0.988485	0.818341	0.987593	-0.0439161	0.970018	0.473586	1	-0.208715	0.865308	31.7384	31.7158	31.7906	31.8977	31.8824	32.004	31.739	32.1849	32.0374	31.9654	31.6248
P56399	Ubiquitin carboxyl-terminal hydrolase 5	Usp5	0.674055	0.976019	0.0154426	1.01076	0.993824	0.999382	0.00021162	1.00015	0.637221	0.982304	-0.0152309	0.989498	0.873651	0.983715	-0.0103683	0.992839	0.435493	1	0.0347996	1.02441	0.675515	0.993845	0.0163269	1.01138	0.614201	1	-0.0184727	0.987277	0.397734	0.963396	0.0531168	1.0375	0.217158	1	0.0450125	1.03169	31.9443	31.8874	31.9324	31.9905	31.8997	32.0105	31.8586	31.8961	31.9513	31.9499	31.981
P42932	T-complex protein 1 subunit theta	Cct8	0.235348	0.957096	0.0232841	1.01627	0.00307756	0.895217	0.129842	1.09417	0.00497394	0.834647	0.106557	1.07666	0.258769	0.810218	0.114809	1.08283	0.0526925	1	0.0442085	1.03112	0.00161137	0.828257	0.145265	1.10593	0.00136826	0.931867	0.101056	1.07256	0.0771859	0.962895	0.045248	1.03186	0.604482	1	0.0314954	1.02207	31.996	32.0152	32.0289	31.9778	31.9875	32.0293	31.9661	31.9525	31.9708	31.8231	31.9641
Q3UNH4	G protein-regulated inducer of neurite outgrowth 1	Gprin1	0.39558	0.938622	0.0495669	1.03495	0.474193	0.940848	0.121852	1.08813	0.612227	0.938312	0.0722847	1.05138	0.799489	0.963687	-0.0277643	0.980939	0.526231	1	0.0446339	1.03142	0.457655	0.901823	0.183618	1.13573	0.554888	0.97446	0.138984	1.10113	0.0593532	0.914093	0.0757968	1.05394	0.459668	1	0.242545	1.18308	32.014	31.7761	31.9863	31.8566	31.905	31.9033	31.8486	31.7888	31.8477	31.836	32.0279
P67778	Prohibitin	Phb	0.703538	0.949907	0.0392638	1.02759	0.64827	0.977145	0.0539592	1.03811	0.840809	0.986266	0.0146954	1.01024	0.368449	0.896227	0.0603514	1.04272	0.514714	1	0.0922318	1.06602	0.641955	0.961705	0.0764898	1.05445	0.899392	1	-0.015742	0.989148	0.792893	0.990248	-0.0243559	0.983259	0.498277	1	-0.100449	0.932742	31.8066	32.281	31.9027	31.9887	31.9883	31.8935	32.0769	31.9465	31.8723	31.9029	31.8582
Q80Z38	SH3 and multiple ankyrin repeat domains protein 2	Shank2	0.208494	0.822914	0.13731	1.09985	0.507489	0.921144	0.161799	1.11868	0.907266	0.983414	0.0244892	1.01712	0.252052	0.687811	-0.271556	0.828426	0.701863	1	0.050801	1.03584	0.433183	0.886413	0.272654	1.20803	0.512863	0.951021	0.221853	1.16623	0.500633	0.934879	-0.100042	0.933006	0.39586	1	0.393366	1.31345	32.314	32.178	32.2601	31.9459	32.0853	31.869	32.2368	31.9882	32.0066	32.117	32.3804
P31938	Dual specificity mitogen-activated protein kinase kinase 1	Map2k1	0.671686	0.964044	-0.0227413	0.984361	0.645809	0.981838	0.042321	1.02977	0.477792	0.934899	0.0650623	1.04613	0.463936	0.906334	-0.0535479	0.963564	0.851322	0.995875	0.0144819	1.01009	0.130257	0.869541	0.158618	1.11622	0.262169	0.938917	0.144136	1.10507	0.68346	0.984004	0.043807	1.03083	0.122899	1	0.241491	1.18221	31.7923	31.8718	31.8733	31.8683	31.8638	31.9371	31.9507	31.7142	31.9051	31.907	32.0011
Q9R0Y5	Adenylate kinase isoenzyme 1	Ak1	0.313921	0.936396	0.0522987	1.03692	0.0433988	0.919344	-0.0940166	0.936911	0.0147545	0.785916	-0.146315	0.903555	0.0456074	0.765984	-0.111172	0.925836	0.431155	1	0.0662721	1.04701	0.155817	0.909324	-0.103472	0.93079	0.110364	0.903771	-0.169744	0.889	0.726612	0.987804	0.0336777	1.02362	0.724309	1	-0.024895	0.982892	31.8076	31.8196	31.8636	31.7458	31.7641	31.79	31.6578	31.8766	31.6956	31.8673	31.9091
Q9CXS4	Centromere protein V	Cenpv	0.261426	0.838911	-0.122003	0.918911	0.275354	0.884778	-0.251016	0.840304	0.520978	0.892082	-0.129013	0.914457	0.145689	0.6512	-0.24674	0.842799	0.285202	0.999653	-0.18321	0.880741	0.523565	0.902896	-0.233739	0.850428	0.888762	1	-0.0505282	0.965583	0.419675	0.886409	-0.134785	0.910805	0.893189	1	0.0614268	1.0435	31.3565	31.277	31.1885	31.5165	31.3855	31.366	31.2874	31.6115	31.6328	31.5168	31.7282
Q9QUI0	Transforming protein RhoA	Rhoa	0.251402	0.893022	-0.0760349	0.948661	0.903781	0.995568	-0.0108658	0.992497	0.468617	0.934851	0.0651691	1.04621	0.95101	0.991238	-0.00415707	0.997123	0.381621	1	-0.0883605	0.940591	0.872861	0.994367	0.0230261	1.01609	0.493371	0.977263	0.111387	1.08027	0.686652	0.982375	-0.0474539	0.967643	0.706862	1	0.0680898	1.04833	31.7555	31.7234	31.7476	31.8753	31.7694	31.8766	31.739	32.0045	31.8678	31.8003	31.854
Q9JII6	Aldo-keto reductase family 1 member A1	Akr1a1	0.412469	0.940148	-0.0467038	0.968146	0.291377	0.972074	0.0438151	1.03084	0.0895974	0.87998	0.090519	1.06475	0.0200385	0.639493	0.2003	1.14894	0.753068	1	0.0204277	1.01426	0.438671	0.979711	0.0377591	1.02652	0.783923	1	0.0173314	1.01209	0.196525	0.881832	0.114307	1.08246	0.175542	1	-0.0686614	0.953522	31.7421	31.8883	31.8179	31.777	31.9487	31.8945	31.8058	31.7194	31.8967	31.7311	31.7115
P97351	40S ribosomal protein S3a	Rps3a	0.0125524	0.814776	-0.114442	0.923739	0.436037	0.920813	-0.140886	0.906962	0.865469	0.977821	-0.0264439	0.981837	0.590467	0.918236	0.0520535	1.03674	0.0818565	1	-0.111874	0.925385	0.50796	0.904124	-0.19065	0.876211	0.779757	0.991159	-0.0787754	0.946861	0.754785	0.990071	-0.0188821	0.986997	0.690353	1	-0.149711	0.901431	31.849	31.9364	31.8312	31.9009	32.0188	31.9461	32.0727	31.9842	31.9472	32.0039	31.8569
Q9CWZ7	Gamma-soluble NSF attachment protein	Napg	0.593066	0.963087	-0.02199	0.984873	0.617233	0.983256	0.041184	1.02896	0.426556	0.934855	0.0631741	1.04476	0.656277	0.929438	0.0510902	1.03605	0.512652	0.997123	0.0294158	1.0206	0.367747	0.914198	0.100646	1.07225	0.53404	0.976093	0.0712299	1.05061	0.145099	0.886471	0.0981932	1.07043	0.475939	1	0.118333	1.08548	31.7635	31.8381	31.8163	31.7817	31.8979	31.8637	31.8278	31.708	31.812	31.7325	31.9269
Q9ES97	Reticulon-3	Rtn3	0.471163	0.951598	0.0311592	1.02183	0.78062	0.991062	-0.0151531	0.989552	0.380435	0.948284	-0.0463123	0.968409	0.288623	0.920522	-0.0414906	0.971651	0.740976	0.999959	0.0218646	1.01527	0.751895	0.989941	-0.0276623	0.981009	0.595983	0.99088	-0.0495269	0.966253	0.630929	0.985464	-0.0345933	0.976307	0.677242	1	-0.0426296	0.970884	31.7492	31.733	31.8455	31.7237	31.6835	31.7384	31.6759	31.8368	31.724	31.7617	31.7431
O70318	Band 4.1-like protein 2	Epb41l2	0.941027	0.988382	0.00555573	1.00386	0.760285	0.990313	-0.0325104	0.977718	0.737473	0.962451	-0.0380661	0.97396	0.364698	0.882934	0.0721846	1.05131	0.794636	0.99767	0.0316315	1.02217	0.620131	0.959032	-0.0799351	0.9461	0.581047	0.978366	-0.111567	0.925582	0.77037	0.984775	0.0466626	1.03287	0.534984	1	-0.137088	0.909352	31.8233	31.8496	31.8268	31.8823	31.8884	31.8475	31.6136	32.0002	31.8501	31.8543	31.7372
P14733	Lamin-B1	Lmnb1	0.474808	0.855111	0.132617	1.09628	0.933654	0.9928	-0.0180319	0.987579	0.342909	0.842234	-0.150649	0.900845	0.697871	0.915212	0.0651817	1.04622	0.841806	0.997842	0.0559095	1.03951	0.401619	0.891678	-0.238627	0.847551	0.0943823	0.864074	-0.294537	0.815334	0.530822	0.920975	-0.12118	0.919436	0.0235045	1	-0.480898	0.716532	31.5832	31.3054	31.1617	31.9438	31.1538	31.4326	31.2085	31.4757	31.559	31.1866	31.2695
Q4ACU6	SH3 and multiple ankyrin repeat domains protein 3	Shank3	0.531785	0.920155	0.0809574	1.05772	0.997834	0.999396	-0.000417328	0.999711	0.582463	0.931059	-0.0813747	0.945157	0.321537	0.721193	-0.233582	0.850521	0.91341	0.999075	0.02115	1.01477	0.850291	0.991602	0.0412464	1.029	0.932235	0.999764	0.0200965	1.01403	0.710896	0.964367	-0.0805664	0.945686	0.533438	1	0.173112	1.12749	32.0739	31.9721	32.1569	31.7618	31.9582	31.7655	32.2275	31.8078	31.7919	31.9448	32.2461
B2RSH2	Guanine nucleotide-binding protein G(i) subunit alpha-1	Gnai1	0.403015	0.952328	-0.0342638	0.97653	0.162608	0.945137	-0.0810293	0.945383	0.297221	0.947937	-0.0467655	0.968104	0.890752	0.98555	0.0123434	1.00859	0.863732	0.999545	-0.0098114	0.993222	0.208763	0.912374	-0.0959829	0.935635	0.168924	0.970435	-0.0861715	0.942019	0.547984	0.985842	0.029926	1.02096	0.439104	1	-0.0685889	0.95357	31.5906	31.6883	31.686	31.5473	31.7181	31.6425	31.7034	31.6232	31.6245	31.5981	31.7378
P20444	Protein kinase C alpha type	Prkca	0.276418	0.885384	-0.0813303	0.945186	0.920114	0.993119	0.013941	1.00971	0.47537	0.909269	0.0952713	1.06827	0.110476	0.648126	-0.229171	0.853125	0.236523	1	-0.121587	0.919176	0.153496	0.833402	0.189979	1.14075	0.0642756	0.859002	0.311566	1.24105	0.274194	0.866186	-0.13526	0.910506	0.0594632	1	0.405477	1.32453	31.797	31.7666	31.9236	31.8669	31.7952	31.8821	31.8452	31.9738	32.1028	32.1388	31.9969
Q8BVI4	Dihydropteridine reductase	Qdpr	0.313491	0.869255	-0.096666	0.935192	0.938357	0.99617	0.00750952	1.00522	0.346903	0.888685	0.104176	1.07488	0.0965186	0.721893	0.153077	1.11194	0.52804	1	-0.095986	0.935633	0.874299	0.994088	-0.0244115	0.983222	0.720187	0.984059	0.0715745	1.05086	0.787734	0.984719	0.0488437	1.03444	0.866103	1	-0.0326589	0.977617	31.8121	31.8007	31.7782	31.6311	31.888	31.875	31.6432	32.0778	31.7771	31.7794	31.6775
Q8CC35	Synaptopodin	Synpo	0.736695	0.951301	0.0368616	1.02588	0.06479	0.804804	0.280299	1.21445	0.092681	0.708057	0.243438	1.18381	0.650306	0.89901	0.0789099	1.05622	0.965337	0.996969	0.00677172	1.0047	0.110589	0.671376	0.359894	1.28333	0.13599	0.860937	0.353123	1.27732	0.815262	0.986548	-0.0463117	0.968409	0.333715	1	0.227901	1.17113	32.0685	32.1683	32.043	31.8553	32.1101	31.8281	32.2362	31.8504	31.9597	31.8405	31.9399
Q8BRT1	CLIP-associating protein 2	Clasp2	0.0607589	0.829904	-0.105585	0.929428	0.0252058	0.880105	-0.163777	0.892685	0.277628	0.933488	-0.0581917	0.960467	0.444643	0.880032	-0.0816994	0.944944	0.129355	1	-0.0948944	0.936341	0.195811	0.899657	-0.137414	0.909147	0.602437	0.994706	-0.0425199	0.970958	0.76996	0.989603	-0.0212437	0.985383	0.863592	1	0.0179358	1.01251	31.6667	31.7806	31.8021	31.6478	31.9037	31.7306	31.8279	31.8628	31.8245	31.8999	31.8978
O70133	ATP-dependent RNA helicase A	Dhx9	0.735059	0.949009	0.0580502	1.04106	0.910056	0.995931	0.00373459	1.00259	0.718889	0.953046	-0.0543156	0.963051	0.430039	0.722314	-0.303488	0.810291	0.0174213	1	-0.0982176	0.934186	0.600555	0.993004	0.0135816	1.00946	0.00280658	0.915705	0.111799	1.08058	0.148753	0.675382	-0.438232	0.738038	0.661761	1	-0.0229454	0.984221	31.7028	31.8205	31.7662	31.7499	31.7422	31.1355	31.8897	31.891	31.8506	31.8032	31.6815
Q791V5	Mitochondrial carrier homolog 2	Mtch2	0.927781	0.987798	-0.00945406	0.993468	0.66271	0.972486	0.0613002	1.04341	0.628512	0.941871	0.0707542	1.05027	0.430973	0.759378	0.218214	1.16329	0.315998	1	0.084926	1.06063	0.784923	0.981475	0.0573737	1.04057	0.892968	1	-0.0275523	0.981083	0.15168	0.748468	0.249189	1.18854	0.99064	1	0.00342274	1.00238	31.5151	31.4917	31.3912	31.5989	31.5006	31.8157	31.4001	31.4886	31.3382	31.2822	31.5977
Q9JM52	Misshapen-like kinase 1	Mink1	0.0429525	0.710227	0.242521	1.18306	0.275092	0.90169	0.138142	1.10049	0.37785	0.890661	-0.104378	0.930206	0.12617	0.48292	-0.3781	0.76945	0.20297	0.991956	0.179792	1.13272	0.113055	0.771591	0.257895	1.19573	0.536025	0.977818	0.0781034	1.05563	0.145949	0.775734	-0.209596	0.86478	0.202463	1	0.246608	1.18641	31.8311	31.9129	32.076	31.7578	31.4619	31.5905	31.6558	31.667	31.8845	31.7701	32.0384
Q8K596	Sodium/calcium exchanger 2	Slc8a2	0.674491	0.957915	-0.0293962	0.97983	0.482642	0.970752	-0.0521443	0.964502	0.746179	0.977921	-0.0227482	0.984356	0.398848	0.810818	-0.138171	0.90867	0.698631	0.997408	-0.0344137	0.976429	0.797337	0.993604	0.0197868	1.01381	0.521157	0.982549	0.0542005	1.03828	0.466156	0.945628	-0.0816434	0.944981	0.342315	1	0.110728	1.07977	31.5889	31.7615	31.7474	31.5895	31.5753	31.7292	31.7216	31.6339	31.8463	31.6858	31.8951
P62827;Q14AA6	GTP-binding nuclear protein Ran	Ran;1700009N14Rik	0.266838	0.931502	0.0552864	1.03907	0.127905	0.885229	0.185278	1.13704	0.212219	0.843375	0.129991	1.09429	0.421387	0.876876	0.0845604	1.06036	0.409499	1	0.0477428	1.03365	0.276778	0.868498	0.208021	1.1551	0.379376	0.952049	0.160278	1.1175	0.794088	0.990289	0.0202767	1.01415	0.674277	1	0.0959946	1.0688	31.8966	31.7815	31.8016	31.919	31.7257	31.8874	31.7718	31.8425	31.7445	31.6983	31.7457
P48722	Heat shock 70 kDa protein 4L	Hspa4l	0.997786	0.999516	0.000133705	1.00009	0.289982	0.956782	-0.0679613	0.953985	0.266874	0.922259	-0.068095	0.953897	0.705031	0.965571	0.0228901	1.01599	0.666298	0.998634	0.0321693	1.02255	0.284318	0.910864	-0.0965824	0.935246	0.209929	0.944561	-0.128752	0.914622	0.505661	0.964615	0.053991	1.03813	0.37458	1	-0.0976508	0.934553	31.6603	31.7701	31.7094	31.6266	31.7306	31.7171	31.6657	31.7677	31.5762	31.649	31.753
O35129	Prohibitin-2	Phb2	0.5028	0.941264	0.0446963	1.03147	0.547418	0.98421	0.0348594	1.02446	0.85345	0.992121	-0.00983696	0.993205	0.584407	0.929683	-0.0460587	0.968579	0.681095	1	0.0368017	1.02584	0.477155	0.969744	0.0511125	1.03606	0.85264	1	0.0143108	1.00997	0.334024	0.917484	-0.0931231	0.937491	0.673192	1	-0.0327536	0.977553	31.7607	31.9807	31.8591	31.7945	31.7507	31.7456	31.9513	31.8389	31.7338	31.723	31.8655
Q3UHD9	Arf-GAP with GTPase, ANK repeat and PH domain-containing protein 2	Agap2	0.320852	0.877195	0.0904533	1.0647	0.559029	0.953818	0.0997948	1.07162	0.949357	0.989972	0.00934143	1.0065	0.153699	0.641621	-0.25753	0.836519	0.795704	0.994703	0.0305812	1.02142	0.380702	0.896592	0.217837	1.16299	0.411138	0.939554	0.187256	1.1386	0.157512	0.831841	-0.154458	0.89847	0.352815	1	0.290328	1.22292	31.8903	31.928	32.0518	31.714	31.7821	31.6437	31.9029	31.7691	31.9301	31.8791	32.0618
Q8BMS1	Trifunctional enzyme subunit alpha, mitochondrial	Hadha	0.800387	0.96763	0.0221679	1.01548	0.26167	0.921475	0.106288	1.07646	0.337283	0.909454	0.0841202	1.06004	0.684637	0.963955	0.0254726	1.01781	0.643807	1	0.0527706	1.03726	0.194538	0.867934	0.175989	1.12974	0.43947	0.969729	0.123219	1.08916	0.666544	0.967653	-0.0613877	0.958342	0.811017	1	0.0363582	1.02552	31.8356	32.0563	31.9857	32.1266	31.9792	31.905	31.816	32.144	32.0504	31.9561	31.8771
P60335	Poly(rC)-binding protein 1	Pcbp1	0.641509	0.96278	0.0206891	1.01444	0.260139	0.966059	0.0601205	1.04255	0.466771	0.952816	0.0394314	1.02771	0.904403	0.983795	-0.0109529	0.992437	0.509281	1	0.0365321	1.02565	0.0999057	0.90241	0.109553	1.07889	0.262347	0.980042	0.0730209	1.05192	0.605214	0.983289	0.0426763	1.03002	0.116315	1	0.12665	1.09176	31.8201	31.7523	31.8362	31.8571	31.7484	31.8943	31.7104	31.8456	31.78	31.8667	31.798
P47738	Aldehyde dehydrogenase, mitochondrial	Aldh2	0.738315	0.95204	-0.0496992	0.966138	0.864879	0.992594	0.0231775	1.0162	0.524223	0.930849	0.0728767	1.05181	0.614714	0.914555	0.0577602	1.04085	0.947934	0.999081	-0.0123577	0.991471	0.656736	0.965009	0.0705967	1.05015	0.658241	0.979544	0.0829544	1.05918	0.502835	0.900625	-0.139409	0.907891	0.497522	1	-0.114215	0.923885	31.6027	32.035	31.7665	32.1238	31.828	31.8681	31.7089	32.1724	32.081	31.886	31.6945
P56382	ATP synthase subunit epsilon, mitochondrial	Atp5f1e	0.58662	0.950169	-0.0360325	0.975333	0.556183	0.980645	0.0412018	1.02897	0.176842	0.908283	0.0772343	1.05499	0.491527	0.875462	0.092804	1.06644	0.895921	0.999355	0.010987	1.00764	0.413419	0.938936	0.0778414	1.05544	0.380306	0.979305	0.0668545	1.04743	0.64971	0.983326	0.0391884	1.02754	0.894679	1	0.0132389	1.00922	31.5953	31.8304	31.6001	31.7314	31.8239	31.6738	31.7849	31.6395	31.7046	31.5741	31.738
Q3TEA8	Heterochromatin protein 1-binding protein 3	Hp1bp3	0.271312	0.790693	0.219642	1.16444	0.7494	0.993315	-0.0280864	0.98072	0.172431	0.752054	-0.247729	0.842221	0.17982	0.499595	-0.446913	0.733611	0.908716	0.999031	0.020401	1.01424	0.450113	0.927219	-0.0945384	0.936572	0.515089	0.977028	-0.114939	0.923421	0.145427	0.669288	-0.47395	0.71999	0.278358	1	-0.141977	0.906276	31.6184	31.581	31.4304	31.7278	31.2952	30.8755	31.3195	31.5432	31.8153	31.4648	31.5998
Q06185	ATP synthase subunit e, mitochondrial	Atp5me	0.512182	0.951421	0.0362334	1.02543	0.298419	0.968476	0.0518851	1.03662	0.751518	0.983271	0.0156517	1.01091	0.485715	0.91383	-0.0519781	0.964613	0.606542	1	0.0420024	1.02954	0.145903	0.909021	0.102741	1.07381	0.404683	0.976254	0.0607382	1.043	0.907244	1	-0.0110642	0.99236	0.0816758	1	0.101652	1.073	31.8628	31.864	31.9996	31.8471	31.7894	31.9116	31.9319	31.747	31.9058	31.8977	31.9073
P60469	Liprin-alpha-3	Ppfia3	0.85291	0.983311	0.0140252	1.00977	0.508998	0.970942	-0.0581923	0.960467	0.324353	0.924394	-0.0722176	0.951175	0.00634121	0.672267	-0.162078	0.893737	0.865273	0.999818	-0.0192572	0.986741	0.778679	0.991316	-0.0315679	0.978356	0.912277	0.998032	-0.0123107	0.991503	0.97436	1	0.00340144	1.00236	0.203806	1	0.153169	1.11201	31.8326	31.7956	31.7395	31.5469	31.7057	31.7276	31.8185	31.5675	31.7539	31.8718	31.8857
Q60625	Intercellular adhesion molecule 5	Icam5	0.412537	0.939755	0.0471839	1.03325	0.217723	0.874658	0.266504	1.20289	0.254852	0.794837	0.21932	1.16418	0.847762	0.985268	-0.0109968	0.992407	0.482317	1	0.0601355	1.04256	0.155566	0.667249	0.433	1.35004	0.221464	0.875283	0.372864	1.29492	0.622034	0.969656	0.055967	1.03956	0.261575	1	0.439828	1.35644	31.9651	31.8811	31.9488	31.9521	31.8754	31.9709	31.9226	31.7202	31.9587	31.9177	31.9506
Q9Z2D6	Methyl-CpG-binding protein 2	Mecp2	0.168555	0.804989	0.159701	1.11706	0.998671	0.999182	-0.000208378	0.999856	0.230432	0.827051	-0.159909	0.895081	0.371349	0.798959	-0.14257	0.905904	0.34374	1	0.139346	1.10141	0.86092	0.988955	-0.0321229	0.97798	0.455988	0.953472	-0.171469	0.887938	0.660331	0.956495	0.0863174	1.06166	0.812422	1	0.0574191	1.0406	31.9263	31.6581	31.786	31.6763	31.7586	31.5489	31.3275	31.7386	31.6363	31.7288	31.8639
Q9JM76	Actin-related protein 2/3 complex subunit 3	Arpc3	0.626162	0.956827	-0.0283951	0.98051	0.398957	0.920547	0.136438	1.09919	0.256725	0.826376	0.164833	1.12104	0.255242	0.814416	-0.112138	0.925216	0.298445	1	-0.0830714	0.944046	0.22663	0.814245	0.26641	1.20281	0.125451	0.864034	0.349481	1.2741	0.108219	0.8566	-0.118792	0.920959	0.238498	1	0.342827	1.26824	31.8152	31.6917	31.7731	31.8949	31.7213	31.7804	31.8873	31.7989	31.9227	31.9276	31.7984
Q9CPQ8	ATP synthase subunit g, mitochondrial	Atp5mg	0.144424	0.801859	-0.164878	0.892004	0.320285	0.899456	-0.156029	0.897492	0.952843	0.990576	0.00884857	1.00615	0.337717	0.720029	0.247127	1.18684	0.856998	0.998766	0.0058492	1.00406	0.494525	0.910705	-0.144154	0.90491	0.48158	0.962509	-0.150003	0.901248	0.0239213	0.681741	0.296623	1.22827	0.744732	1	-0.100507	0.932705	31.4859	31.6701	31.6982	31.7142	32.0656	31.9043	31.6451	31.6803	31.7396	31.9183	31.5573
P80313	T-complex protein 1 subunit eta	Cct7	0.769899	0.987106	-0.00887899	0.993864	0.00635113	0.899201	0.115186	1.08311	0.00344354	0.802993	0.124065	1.0898	0.114285	0.721091	0.160996	1.11806	0.474786	0.995904	0.0221367	1.01546	0.0383681	0.897406	0.12158	1.08793	0.0506728	0.954319	0.0994434	1.07136	0.268626	0.961744	0.0527623	1.03725	0.874535	1	-0.00879065	0.993925	31.7783	31.8414	31.8413	31.7712	31.8038	31.8933	31.8153	31.8071	31.765	31.6481	31.727
P15919	V(D)J recombination-activating protein 1	Rag1	0.0184192	0.548636	0.539339	1.45331	0.291861	0.890315	0.205249	1.15288	0.0881737	0.637048	-0.334091	0.793284	0.130801	0.581129	-0.309214	0.807082	0.118605	0.901642	0.538824	1.45279	0.541998	0.906607	0.188148	1.1393	0.308287	0.903613	-0.350676	0.784217	0.828989	0.984629	-0.0657911	0.955421	0.731697	1	-0.107253	0.928354	31.8955	31.8439	32.3539	31.7983	31.2768	31.5114	31.4464	31.1109	31.8224	31.7445	31.6621
P34884	Macrophage migration inhibitory factor	Mif	0.205399	0.846329	0.0989336	1.07098	0.124166	0.91909	0.0929216	1.06653	0.902822	0.990226	-0.00601196	0.995841	0.524376	0.89573	0.0666924	1.04731	0.102392	0.969606	0.166524	1.12235	0.121811	0.901728	0.112042	1.08076	0.413557	0.979622	-0.0544815	0.96294	0.551923	0.960171	0.0655451	1.04648	0.0987049	1	-0.0556288	0.962175	31.6795	31.942	31.7537	31.8392	31.6571	31.8309	31.7812	31.6701	31.584	31.685	31.6695
Q8R480	Nuclear pore complex protein Nup85	Nup85	0.998026	0.99949	0.000273132	1.00019	0.927331	0.993849	0.0206409	1.01441	0.917933	0.986538	0.0203678	1.01422	0.47081	0.733012	0.3217	1.2498	0.771375	0.998451	-0.0416857	0.971519	0.293025	0.858766	-0.222206	0.857254	0.351238	0.928208	-0.18052	0.882385	0.955775	1	0.00921472	1.00641	0.215749	1	-0.493006	0.710543	31.7843	31.5681	31.4376	31.7995	31.8004	31.5048	31.7524	31.4821	31.6957	31.6644	30.9975
P43024	Cytochrome c oxidase subunit 6A1, mitochondrial	Cox6a1	0.973135	0.99319	-0.0041194	0.997149	0.052043	0.873722	-0.193216	0.874654	0.0869713	0.774415	-0.189097	0.877155	0.348736	0.721035	-0.26014	0.835007	0.658189	1	-0.0566572	0.961489	0.135289	0.831177	-0.198392	0.871522	0.147659	0.913043	-0.141734	0.906429	0.307401	0.829975	-0.203838	0.868238	0.418638	1	-0.0854324	0.942502	31.4513	31.382	31.7142	31.6055	31.2301	31.61	31.7572	31.5739	31.5406	31.581	31.7794
P57746	V-type proton ATPase subunit D	Atp6v1d	0.902287	0.986717	0.00743732	1.00517	0.431942	0.972156	0.0472361	1.03328	0.442687	0.953079	0.0397987	1.02797	0.623533	0.91496	0.0586929	1.04152	0.696512	1	0.0372988	1.02619	0.404164	0.95831	0.0645014	1.04572	0.694731	1	0.0272026	1.01903	0.608436	0.978615	0.0459172	1.03234	0.866694	1	0.0144269	1.01005	31.6961	31.8522	31.626	31.7482	31.7232	31.7783	31.7298	31.5901	31.7946	31.5937	31.7904
P28738	Kinesin heavy chain isoform 5C	Kif5c	0.571435	0.951558	-0.0312359	0.978582	0.900348	0.996766	0.008535	1.00593	0.515471	0.953877	0.0397709	1.02795	0.231485	0.795284	0.124187	1.08989	0.906346	0.998527	-0.00635974	0.995601	0.822327	0.990022	-0.0228659	0.984275	0.850083	1	-0.0165062	0.988624	0.0535587	0.852642	0.118395	1.08553	0.855692	1	-0.0222975	0.984663	31.651	31.4839	31.5448	31.6543	31.7344	31.6372	31.5865	31.5562	31.5595	31.507	31.6162
P97450	ATP synthase-coupling factor 6, mitochondrial	Atp5pf	0.594985	0.946178	-0.0456968	0.968822	0.94713	0.996712	0.00759106	1.00528	0.624843	0.947885	0.0532879	1.03763	0.405419	0.771912	0.177492	1.13092	0.725856	0.999262	0.0376994	1.02648	0.958544	0.994867	0.00818443	1.00569	0.843525	1	-0.0295149	0.97975	0.0987136	0.774616	0.191165	1.14168	0.943405	1	-0.0158424	0.989079	31.7433	31.6231	31.7999	31.89	31.931	31.9179	31.7242	31.6301	31.8457	31.5774	31.9166
Q60605	Myosin light polypeptide 6	Myl6	0.317302	0.823577	0.157394	1.11527	0.858934	0.992815	0.0235536	1.01646	0.413236	0.877387	-0.13384	0.911402	0.364016	0.700341	-0.362121	0.77802	0.709446	1	0.0602398	1.04264	0.639072	0.961769	0.0785866	1.05598	0.920943	1	0.0183468	1.0128	0.301474	0.781845	-0.281849	0.822536	0.696346	1	0.0986182	1.07075	31.7902	31.7283	31.7995	32.0299	31.2889	31.7321	31.933	31.5538	31.8902	31.6548	32.0904
Q9EQ20	Methylmalonate-semialdehyde dehydrogenase [acylating], mitochondrial	Aldh6a1	0.64616	0.950531	-0.0350371	0.976007	0.519337	0.980587	0.0403169	1.02834	0.318288	0.91733	0.075354	1.05362	0.107205	0.719562	0.16079	1.1179	0.952778	0.998731	0.00699615	1.00486	0.745785	0.989465	0.0253925	1.01776	0.881394	1	0.0183964	1.01283	0.731877	0.983343	0.0490704	1.0346	0.349523	1	-0.0933237	0.937361	31.5393	31.6943	31.5395	31.6528	31.6799	31.662	31.4201	31.7262	31.7194	31.4535	31.5668
P08226	Apolipoprotein E	Apoe	0.71598	0.928831	0.116876	1.08438	1.87446e-06	0.142	2.7367	6.66546	2.62493e-06	0.056	2.61983	6.14677	0.00482455	0.293714	2.86413	7.28098	0.571143	1	0.219629	1.16443	0.000288981	0.4144	2.67659	6.39342	0.000901122	1	2.45696	5.49058	0.223175	0.67674	0.592722	1.50809	0.00826623	1	0.185548	1.13725	34.9034	33.9172	34.5766	34.6043	34.5399	34.9384	34.1145	34.6411	33.6836	31.8879	31.8621
Q6PHZ2	Calcium/calmodulin-dependent protein kinase type II subunit delta	Camk2d	0.255174	0.774816	0.268675	1.2047	0.411213	0.903897	-0.202989	0.868749	0.115593	0.598333	-0.471664	0.721133	0.757356	0.934815	0.0556812	1.03935	0.323769	0.969319	0.342726	1.26815	0.134446	0.614903	-0.480501	0.716729	0.0983408	0.690131	-0.823227	0.565176	0.465213	0.835165	0.321928	1.25	0.191753	1	-0.55698	0.679723	31.852	31.7747	31.512	31.6127	31.5306	31.694	30.7033	31.5322	31.6357	31.6912	31.4221
Q8BG39	Synaptic vesicle glycoprotein 2B	Sv2b	0.278459	0.845683	0.10803	1.07776	0.970642	0.996878	-0.00360403	0.997505	0.349329	0.883356	-0.111634	0.925539	0.20369	0.757585	-0.145519	0.904054	0.289538	1	0.164426	1.12072	0.559126	0.957657	0.0753822	1.05364	0.629865	0.979388	-0.0890433	0.940146	0.483321	0.900968	0.133625	1.09705	0.307432	1	0.190101	1.14084	31.6085	31.6904	31.6137	31.5569	31.5675	31.6115	31.6067	31.1989	31.5621	31.66	31.81
Q9Z218	Dipeptidyl aminopeptidase-like protein 6	Dpp6	0.698841	0.963414	-0.0228433	0.984291	0.921568	0.996498	-0.00925379	0.993606	0.877583	0.9875	0.0135895	1.00946	0.454535	0.848206	-0.109952	0.926619	0.52731	1	-0.0464662	0.968305	0.711845	0.980094	0.0494843	1.03489	0.474655	0.975774	0.0959504	1.06877	0.508825	0.955847	-0.0667706	0.954773	0.440835	1	0.139132	1.10124	31.519	31.4681	31.6329	31.4931	31.4179	31.6043	31.6519	31.5801	31.5015	31.5463	31.6957
P62962;CON__P02584	Profilin-1	Pfn1	0.278234	0.850357	-0.10367	0.930662	0.622324	0.970357	0.0639418	1.04532	0.155769	0.801726	0.167612	1.1232	0.536652	0.928378	-0.0455294	0.968934	0.279726	1	-0.144616	0.90462	0.400399	0.903012	0.16509	1.12124	0.116544	0.866681	0.309706	1.23946	0.166513	0.832479	-0.155158	0.898034	0.362818	1	0.200077	1.14876	31.4892	31.4401	31.7704	31.5105	31.5068	31.6194	31.7979	31.7504	31.6065	31.5837	31.6336
O55125	Protein NipSnap homolog 1	Nipsnap1	0.528795	0.948812	0.0412973	1.02904	0.212969	0.915759	0.11932	1.08622	0.431051	0.922506	0.0780228	1.05557	0.234342	0.926543	0.0392809	1.0276	0.492804	1	0.0715211	1.05082	0.240289	0.885855	0.175372	1.12926	0.547416	0.977781	0.103851	1.07464	0.627653	0.964586	0.0662524	1.04699	0.483255	1	0.130822	1.09492	31.6774	31.6868	31.7099	31.6801	31.7094	31.6645	31.6731	31.4374	31.7517	31.6413	31.6541
Q9CQC7	NADH dehydrogenase [ubiquinone] 1 beta subcomplex subunit 4	Ndufb4	0.163146	0.818625	-0.131902	0.912627	0.0525094	0.829163	-0.235919	0.849144	0.368458	0.889966	-0.104017	0.930439	0.235312	0.80943	0.113564	1.0819	0.973502	1	-0.0024058	0.998334	0.15136	0.795339	-0.251477	0.840036	0.179202	0.898114	-0.249071	0.841438	0.05743	0.693883	0.24403	1.1843	0.571343	1	-0.118606	0.921077	31.4134	31.5816	31.5489	31.4924	31.7871	31.7877	31.4304	31.6477	31.552	31.7415	31.6062
Q9CRB9	MICOS complex subunit Mic19	Chchd3	0.263678	0.823224	0.146993	1.10726	0.639914	0.965798	0.0952103	1.06822	0.738967	0.956362	-0.0517826	0.964744	0.499606	0.842988	0.125725	1.09106	0.424046	1	0.169198	1.12443	0.997484	0.998619	-0.000922521	0.999361	0.495434	0.964977	-0.170121	0.888768	0.88796	0.997758	0.016866	1.01176	0.413962	1	-0.27898	0.824174	31.3038	31.0967	31.3099	31.6902	31.1531	31.2735	31.0491	31.2262	31.3139	30.946	31.2291
P60766	Cell division control protein 42 homolog	Cdc42	0.694062	0.949605	-0.0414484	0.971679	0.536367	0.965259	-0.0764711	0.948375	0.736511	0.967369	-0.0350227	0.976016	0.884151	0.971415	0.0354366	1.02487	0.959164	0.997078	-0.00676791	0.99532	0.622805	0.95794	-0.0887636	0.940328	0.544132	0.97865	-0.0819956	0.94475	0.398906	0.893875	0.121481	1.08785	0.984288	1	0.00404867	1.00281	31.5504	31.2597	31.6329	31.5917	31.7753	31.4708	31.4252	31.5323	31.5471	31.7392	31.436
A2AAJ9	Obscurin	Obscn	0.26367	0.850736	-0.10221	0.931605	0.766921	0.993147	0.0293782	1.02057	0.216113	0.844351	0.131588	1.0955	0.008212	0.405174	0.285981	1.21924	0.705721	0.995442	0.0263939	1.01846	0.727348	0.979249	0.0550531	1.0389	0.846686	1	0.0286592	1.02006	0.00808916	0.682046	0.24947	1.18877	0.967229	1	-0.00785224	0.994572	31.3722	31.5813	31.3834	31.4978	31.7107	31.7105	31.494	31.3998	31.4895	31.3985	31.4507
P47963	60S ribosomal protein L13	Rpl13	0.0396422	0.819385	0.115451	1.08331	0.522537	0.952913	-0.0939308	0.936966	0.138255	0.771494	-0.209381	0.864908	0.175668	0.72111	-0.180408	0.882454	0.261292	1	0.0727704	1.05173	0.505435	0.907846	-0.155927	0.897555	0.352402	0.913152	-0.228697	0.853405	0.398763	0.951055	-0.0732203	0.950514	0.692096	1	-0.12151	0.919225	31.7362	31.6352	31.6893	31.7233	31.5885	31.4847	31.5114	31.6666	31.6515	31.7876	31.6465
Q62059	Versican core protein	Vcan	0.011714	0.79844	-0.132381	0.912325	0.00734963	0.886009	-0.147906	0.90256	0.680026	0.982177	-0.0155247	0.989297	0.457673	0.934332	-0.0361977	0.975222	0.0604038	0.979636	-0.148712	0.902055	0.0751576	0.864332	-0.150455	0.900966	0.97852	0.999008	-0.00174268	0.998793	0.662859	0.993246	-0.0277392	0.980956	0.919367	1	0.00671577	1.00467	31.552	31.455	31.6004	31.5377	31.6898	31.6142	31.6031	31.7294	31.7068	31.7002	31.6762
Q9CQX2	Cytochrome b5 type B	Cyb5b	0.0508969	0.819789	0.118331	1.08548	0.0077314	0.761821	0.234482	1.17648	0.0241602	0.823449	0.116151	1.08384	0.63299	0.966161	0.0214224	1.01496	0.335656	1	0.060358	1.04272	0.0227706	0.706032	0.239662	1.18072	0.0223502	0.904247	0.179303	1.13234	0.213245	0.964327	-0.0469786	0.967961	0.178492	1	0.110902	1.0799	32.045	31.8045	31.9779	31.8825	31.7816	31.7803	31.8739	31.8089	31.801	31.7211	31.7979
P52503	NADH dehydrogenase [ubiquinone] iron-sulfur protein 6, mitochondrial	Ndufs6	0.218429	0.928796	0.055074	1.03891	0.124163	0.902311	-0.120282	0.920008	0.0169459	0.751244	-0.175356	0.885549	0.0379642	0.719038	-0.142801	0.905759	0.669489	0.997298	0.026523	1.01855	0.166485	0.870882	-0.170536	0.888512	0.117144	0.893772	-0.197059	0.872327	0.685458	0.98865	-0.0228885	0.98426	0.562653	1	-0.0771462	0.947931	31.6498	31.5653	31.6504	31.5011	31.504	31.5417	31.4862	31.5342	31.6169	31.6872	31.6441
Q93092	Transaldolase	Taldo1	0.516103	0.959972	-0.0240108	0.983495	0.103962	0.895333	0.154887	1.11333	0.0444325	0.766444	0.178898	1.13202	0.465192	0.885882	0.0771132	1.05491	0.800677	0.999839	-0.00875219	0.993952	0.0842517	0.778305	0.238003	1.17936	0.0757825	0.876037	0.246755	1.18654	0.972431	1	-0.00221443	0.998466	0.306228	1	0.167427	1.12305	31.6169	31.7296	31.6616	31.6533	31.6182	31.7578	31.6879	31.7288	31.6539	31.6614	31.5603
F8VPU2	FERM, ARHGEF and pleckstrin domain-containing protein 1	Farp1	0.440417	0.908096	-0.0806336	0.945642	0.27737	0.957346	0.0672637	1.04773	0.136315	0.814822	0.147897	1.10795	0.205096	0.715318	0.204037	1.15192	0.53829	1	-0.0967115	0.935162	0.704166	0.992187	0.0137596	1.00958	0.493745	0.976909	0.110471	1.07958	0.758195	0.979063	0.0628948	1.04456	0.752607	1	-0.0306708	0.978965	31.8365	31.6499	31.6898	31.6749	31.8005	31.8618	31.6399	32.0545	31.6103	31.7329	31.5213
P80317	T-complex protein 1 subunit zeta	Cct6a	0.440616	0.951508	0.0339291	1.0238	0.157364	0.942109	0.0834225	1.05953	0.29915	0.943721	0.0494934	1.0349	0.807813	0.964133	0.0277777	1.01944	0.0187465	1	0.0764414	1.05441	0.0506255	0.870117	0.140412	1.10222	0.270047	0.978842	0.0639706	1.04534	0.720184	0.990822	0.0218633	1.01527	0.528514	1	0.0580562	1.04106	31.5088	31.636	31.6737	31.6218	31.518	31.6605	31.5927	31.5555	31.5539	31.4909	31.6321
O35098	Dihydropyrimidinase-related protein 4	Dpysl4	0.395622	0.934608	0.0558207	1.03945	0.922068	0.996603	-0.00619869	0.995713	0.401497	0.935104	-0.0620193	0.957922	0.773861	0.950665	0.0417004	1.02933	0.0789522	1	0.144042	1.105	0.813433	0.992416	0.0128765	1.00897	0.175255	0.933916	-0.131166	0.913093	0.154525	0.834271	0.149954	1.10953	0.855156	1	-0.0229117	0.984244	31.4342	31.5526	31.54	31.5488	31.5511	31.5549	31.291	31.4159	31.5023	31.3843	31.6383
E9Q912	RAP1, GTP-GDP dissociation stimulator 1	Rap1gds1	0.485106	0.937979	0.0528085	1.03728	0.96513	0.998494	0.00249834	1.00173	0.439979	0.949458	-0.0503101	0.965729	0.509776	0.884674	-0.0848579	0.942877	0.956597	0.996191	0.00510979	1.00355	0.796477	0.989248	-0.0221685	0.984751	0.780075	1	-0.0272783	0.98127	0.665851	0.973566	-0.0566638	0.961485	0.991398	1	0.000915845	1.00064	31.6821	31.606	31.6617	31.4781	31.4158	31.6245	31.567	31.7018	31.4617	31.5829	31.6271
Q9QUP5	Hyaluronan and proteoglycan link protein 1	Hapln1	0.302372	0.927011	-0.0593036	0.959727	0.118972	0.876841	0.20624	1.15368	0.0256208	0.640506	0.265543	1.20209	0.479908	0.927963	0.0438595	1.03087	0.592447	1	-0.0389595	0.973357	0.0188398	0.523217	0.374373	1.29628	0.00993888	0.688241	0.413333	1.33176	0.542167	0.982689	-0.0359055	0.975419	0.0561131	1	0.333568	1.26013	31.6578	31.9034	31.7677	31.7189	31.8238	31.7756	31.9118	31.795	31.8	31.711	31.8007
Q61792	LIM and SH3 domain protein 1	Lasp1	0.597871	0.932237	-0.0745337	0.949649	0.230611	0.897383	-0.164801	0.892052	0.356863	0.907523	-0.0902668	0.939349	0.407811	0.862201	0.0927401	1.06639	0.662339	1	-0.0840174	0.943427	0.137597	0.747438	-0.296289	0.814345	0.173203	0.895621	-0.212271	0.863177	0.392625	0.884095	0.146976	1.10725	0.213175	1	-0.158036	0.896245	31.6281	31.1085	31.3523	31.6044	31.6576	31.5145	31.2426	31.6089	31.4656	31.5466	31.44
Q9R0P5	Destrin	Dstn	0.763772	0.956999	0.0335496	1.02353	0.594856	0.968804	-0.0667266	0.954802	0.25433	0.884084	-0.100276	0.932854	0.625957	0.895559	-0.0855484	0.942426	0.751173	1	-0.048755	0.96677	0.369638	0.900638	-0.15885	0.895739	0.367385	0.970192	-0.110095	0.926527	0.530347	0.954201	-0.0729866	0.950668	0.553061	1	-0.0975329	0.93463	31.6142	31.1547	31.5931	31.4573	31.4654	31.2896	31.3339	31.5439	31.4736	31.5845	31.3415
P14824	Annexin A6	Anxa6	0.958313	0.990316	0.00479641	1.00333	0.404753	0.956056	0.0768885	1.05474	0.354997	0.921571	0.0720921	1.05124	0.901807	0.986448	0.014966	1.01043	0.857098	0.999583	0.0186017	1.01298	0.338076	0.908808	0.128778	1.09337	0.377257	0.970451	0.110176	1.07936	0.459576	0.933956	-0.0951697	0.936162	0.999752	1	4.03722e-05	1.00003	31.5854	31.9251	31.786	31.6675	31.5731	31.7851	31.796	31.8691	31.6577	31.6477	31.6805
Q05816	Fatty acid-binding protein 5	Fabp5	0.815693	0.988083	0.00844297	1.00587	0.0305542	0.881661	0.162404	1.11915	0.030928	0.787194	0.153961	1.11262	0.0318739	0.722644	0.137397	1.09992	0.526024	1	0.0350787	1.02461	0.0872423	0.81522	0.200083	1.14876	0.168409	0.911318	0.165004	1.12117	0.468925	0.966715	0.0498257	1.03514	0.543031	1	0.077433	1.05514	31.6392	31.6312	31.6995	31.6674	31.6749	31.6867	31.6369	31.7085	31.5476	31.519	31.5678
Q8K3J1	NADH dehydrogenase [ubiquinone] iron-sulfur protein 8, mitochondrial	Ndufs8	0.188966	0.814922	0.145043	1.10576	0.870015	0.990302	-0.0213011	0.985344	0.175758	0.808246	-0.166344	0.891098	0.566066	0.918772	0.0504866	1.03561	0.167454	0.967436	0.230691	1.1734	0.67121	0.96295	-0.0802066	0.945922	0.12995	0.863132	-0.310898	0.80614	0.271036	0.851681	0.158629	1.11623	0.349975	1	-0.202756	0.868889	31.5258	31.5072	31.5083	31.8281	31.5966	31.4884	31.2747	31.3238	31.5531	31.4413	31.5426
Q9Z0P4	Paralemmin-1	Palm	0.586674	0.950106	0.0341384	1.02395	0.425385	0.97758	0.0413196	1.02905	0.888669	0.991482	0.00718117	1.00499	0.426713	0.876129	0.0840702	1.06	0.44688	1	0.0697632	1.04954	0.711397	0.990213	0.025685	1.01796	0.513991	0.991613	-0.0440782	0.969909	0.321785	0.912409	0.0950816	1.06813	0.632639	1	-0.0330667	0.977341	31.567	31.5079	31.677	31.4871	31.6263	31.539	31.4924	31.3867	31.5836	31.4257	31.5715
P48774	Glutathione S-transferase Mu 5	Gstm5	0.495226	0.942991	0.0437704	1.0308	0.653706	0.990433	0.022888	1.01599	0.741636	0.975497	-0.0208824	0.98563	0.245371	0.73067	-0.181224	0.881954	0.904027	0.998302	0.00625992	1.00435	0.0823131	0.910526	0.0922718	1.06605	0.0626534	0.966138	0.0860119	1.06143	0.278859	0.885979	-0.120723	0.919727	0.00525207	1	0.146513	1.10689	31.6193	31.7298	31.6581	31.5993	31.4248	31.6459	31.7036	31.6665	31.5982	31.7028	31.7304
Q62188	Dihydropyrimidinase-related protein 3	Dpysl3	0.808147	0.987031	-0.00886259	0.993876	0.533041	0.968814	0.0621247	1.044	0.446816	0.925154	0.0709873	1.05044	0.633606	0.894157	0.0808268	1.05762	0.00194615	1	0.0445677	1.03137	0.417508	0.914044	0.108995	1.07848	0.621754	0.979842	0.0644277	1.04567	0.0207949	0.848835	0.115794	1.08357	0.633484	1	0.0993951	1.07132	31.4413	31.466	31.4782	31.4652	31.5748	31.5072	31.425	31.4175	31.4332	31.319	31.6013
P53994	Ras-related protein Rab-2A	Rab2a	0.525541	0.948128	-0.0415537	0.971608	0.0340104	0.87946	0.168955	1.12424	0.00510569	0.675645	0.210509	1.1571	0.0836692	0.539752	0.294868	1.22677	0.944336	0.99896	0.00645701	1.00449	0.101509	0.859017	0.160727	1.11785	0.10167	0.92037	0.15427	1.11286	0.545895	0.964311	0.0560932	1.03965	0.375794	1	-0.0845041	0.943109	31.522	31.7498	31.5752	31.5479	31.6336	31.7143	31.7292	31.5991	31.5253	31.2974	31.4608
Q91VN4	MICOS complex subunit Mic25	Chchd6	0.345484	0.838486	0.123849	1.08964	0.74844	0.983085	-0.0527951	0.964067	0.222714	0.809988	-0.176644	0.884759	0.972158	0.992433	-0.00434685	0.996992	0.458205	1	0.157761	1.11555	0.569617	0.919598	-0.133748	0.911461	0.226461	0.90206	-0.291509	0.817047	0.886083	0.989321	0.0259107	1.01812	0.321133	1	-0.261251	0.834364	31.0447	30.9304	31.0684	31.4177	31.0503	30.9637	30.9019	30.8128	31.2285	30.9098	31.1128
Q7TMF3	NADH dehydrogenase [ubiquinone] 1 alpha subcomplex subunit 12	Ndufa12	0.855701	0.983028	-0.0142138	0.990196	0.703309	0.971595	-0.0694956	0.952971	0.723075	0.954973	-0.0552818	0.962406	0.9273	0.991234	-0.00564957	0.996092	0.662765	1	0.045908	1.03233	0.884339	0.989132	-0.042462	0.970996	0.761432	0.983716	-0.08837	0.940585	0.701146	0.984719	0.0389366	1.02736	0.905988	1	-0.0437838	0.970107	31.6809	31.7158	31.9058	31.9558	31.8	31.9043	31.733	31.7652	31.9414	31.8748	31.8408
Q80TL4	PHD finger protein 24	Phf24	0.363289	0.893052	-0.0820587	0.944709	0.400112	0.953946	0.0759697	1.05407	0.118929	0.80223	0.158028	1.11576	0.0452138	0.498389	0.278897	1.21327	0.630924	1	-0.0498816	0.966016	0.831953	0.988874	0.0275675	1.01929	0.611662	0.975818	0.0774492	1.05515	0.217571	0.829815	0.174016	1.12819	0.866989	1	-0.0274324	0.981165	31.6594	31.4223	31.5775	31.5293	31.7675	31.6997	31.5199	31.7215	31.4373	31.4035	31.5059
Q9CYT6	Adenylyl cyclase-associated protein 2	Cap2	0.550146	0.957984	-0.0258934	0.982212	0.59617	0.971467	0.0589035	1.04167	0.403802	0.911407	0.0847969	1.06054	0.70979	0.935767	-0.0496273	0.966186	0.357063	1	-0.0445404	0.969599	0.355893	0.90943	0.129873	1.0942	0.241543	0.915616	0.174413	1.12851	0.974229	1	0.00249195	1.00173	0.277271	1	0.226532	1.17002	31.5901	31.5405	31.5316	31.4624	31.485	31.6321	31.6248	31.5101	31.5333	31.5189	31.6975
Q9EQH3	Vacuolar protein sorting-associated protein 35	Vps35	0.195019	0.846132	0.097709	1.07007	0.0508591	0.903096	0.11903	1.086	0.705358	0.977435	0.0213211	1.01489	0.0496606	0.700772	0.167032	1.12275	0.126025	1	0.133255	1.09677	0.36122	0.961898	0.0574354	1.04061	0.220046	0.974954	-0.0758197	0.948803	0.0737747	0.791321	0.164555	1.12082	0.150322	1	-0.0782973	0.947175	31.7475	31.5819	31.7277	31.5696	31.6477	31.6677	31.5681	31.5045	31.4069	31.4533	31.528
Q61292	Laminin subunit beta-2	Lamb2	0.620661	0.904418	0.122355	1.08851	0.792561	0.980083	-0.0682544	0.953791	0.281095	0.815053	-0.190609	0.876236	0.701228	0.885275	-0.13018	0.913717	0.846021	1	0.0682189	1.04842	0.673736	0.932887	-0.162676	0.893367	0.397225	0.914444	-0.230895	0.852106	0.679842	0.953504	0.109133	1.07858	0.979332	0.999565	0.00841872	1.00585	32.038	31.076	32.0813	31.7833	31.4765	31.899	31.3085	31.7773	31.6502	31.6135	32.0225
Q91V41	Ras-related protein Rab-14	Rab14	0.121434	0.93224	0.0488561	1.03444	0.0948644	0.903599	0.125864	1.09116	0.231208	0.909166	0.0770077	1.05483	0.32131	0.84323	0.0990801	1.07109	0.142044	1	0.0700773	1.04977	0.23577	0.900449	0.13237	1.09609	0.56133	0.980214	0.0622927	1.04412	0.596784	0.993179	0.0267089	1.01869	0.943749	1	-0.0100784	0.993039	31.4839	31.5387	31.5526	31.487	31.4612	31.5042	31.4935	31.4839	31.3906	31.3109	31.4564
Q9DCS9	NADH dehydrogenase [ubiquinone] 1 beta subcomplex subunit 10	Ndufb10	0.280001	0.928225	-0.0574826	0.960939	0.496225	0.98001	-0.0425782	0.970918	0.825085	0.985537	0.0149044	1.01038	0.810413	0.975636	0.0176315	1.0123	0.92248	0.999911	-0.00581996	0.995974	0.933234	0.996055	0.00726636	1.00505	0.898954	0.999424	0.0130863	1.00911	0.321014	0.912643	0.0950457	1.0681	0.46066	1	0.0905005	1.06474	31.3364	31.4196	31.3707	31.3826	31.4395	31.5442	31.5052	31.3396	31.3456	31.512	31.4364
Q99N28	Cell adhesion molecule 3	Cadm3	0.890228	0.9877	0.0066165	1.0046	0.038888	0.874661	-0.183349	0.880656	0.00906747	0.709589	-0.189966	0.876626	0.00868637	0.374308	-0.327818	0.796741	0.667544	0.997667	-0.0288938	0.980172	0.10003	0.900804	-0.126958	0.91576	0.0557278	0.957673	-0.0980644	0.934286	0.607558	0.992474	-0.0235853	0.983785	0.0080637	1	0.206168	1.15362	31.5125	31.4469	31.4784	31.2993	31.3907	31.4362	31.4609	31.4712	31.3791	31.7206	31.762
Q810U4	Neuronal cell adhesion molecule	Nrcam	0.321116	0.951086	0.0280742	1.01965	0.49421	0.969879	0.0564273	1.03989	0.688022	0.971788	0.0283531	1.01985	0.88621	0.983547	-0.0153322	0.989429	0.301977	1	0.0423972	1.02982	0.372735	0.913498	0.0998739	1.07168	0.578954	0.982736	0.0574767	1.04064	0.0883143	0.95928	0.0480293	1.03385	0.453025	1	0.120838	1.08737	31.5504	31.5483	31.5764	31.4677	31.5345	31.5383	31.5181	31.4758	31.4714	31.4571	31.6464
Q8VIJ6	Splicing factor, proline- and glutamine-rich	Sfpq	0.805778	0.98732	0.0100258	1.00697	0.266122	0.944837	0.0878365	1.06278	0.29966	0.911069	0.0778107	1.05542	0.130576	0.804002	0.103619	1.07447	0.178664	1	0.0575511	1.0407	0.350409	0.909158	0.118156	1.08535	0.616949	0.981863	0.0606054	1.0429	0.0695886	0.862536	0.109798	1.07908	0.671019	1	0.0667845	1.04738	31.5379	31.6013	31.5353	31.5205	31.6351	31.5741	31.4581	31.5429	31.4834	31.4727	31.5293
Q80TZ3	Putative tyrosine-protein phosphatase auxilin	Dnajc6	0.117084	0.890335	0.0711668	1.05057	0.249696	0.970732	0.0521505	1.03681	0.692972	0.9783	-0.0190163	0.986905	0.562371	0.898641	-0.0669718	0.95464	0.467957	1	0.0435435	1.03064	0.224365	0.956842	0.0564976	1.03994	0.827703	1	0.0129541	1.00902	0.379047	0.954347	-0.0667432	0.954791	0.878055	1	0.0131826	1.00918	31.5527	31.5793	31.5711	31.4964	31.4105	31.4668	31.5936	31.4919	31.4307	31.4125	31.5988
P60843	Eukaryotic initiation factor 4A-I	Eif4a1	0.344482	0.928965	0.0593843	1.04202	0.0566792	0.893057	0.142945	1.10416	0.211783	0.900383	0.0835609	1.05963	0.722972	0.944182	-0.0413961	0.971714	0.615279	1	0.0376193	1.02642	0.0566628	0.79337	0.204485	1.15227	0.0678392	0.892297	0.166866	1.12262	0.456626	0.951549	-0.0743453	0.949773	0.172406	1	0.133917	1.09727	31.6019	31.7344	31.6248	31.5421	31.4288	31.6148	31.6779	31.5606	31.55	31.5225	31.6039
Q8C0T5	Signal-induced proliferation-associated 1-like protein 1	Sipa1l1	0.101278	0.774409	0.188738	1.13977	0.475801	0.93701	0.127479	1.09238	0.728816	0.953043	-0.0612587	0.958428	0.233155	0.635256	-0.337497	0.791413	0.494823	1	0.0632133	1.04479	0.477715	0.90491	0.186113	1.13769	0.647557	0.97731	0.1229	1.08892	0.13717	0.724547	-0.264767	0.832333	0.594062	1	0.19563	1.14522	31.5483	31.5254	31.4551	31.4291	31.2525	31.0313	31.4263	31.2607	31.533	31.3131	31.6457
Q99JF8	PC4 and SFRS1-interacting protein	Psip1	0.201835	0.815746	0.150946	1.1103	0.325445	0.897191	0.182993	1.13524	0.846439	0.977032	0.0320477	1.02246	0.498146	0.941766	-0.0337181	0.976899	0.0807011	0.965976	0.179474	1.13247	0.272572	0.831798	0.255365	1.19364	0.740583	0.98637	0.0758915	1.05401	0.0845021	0.699965	0.253666	1.19223	0.255621	1	0.363276	1.28634	32.0873	31.8112	31.8143	31.7612	31.8392	31.9002	31.5359	31.7665	31.5458	31.8759	31.931
Q71LX4	Talin-2	Tln2	0.841157	0.98702	0.0079771	1.00554	0.926975	0.994863	0.00513783	1.00357	0.952971	0.99407	-0.00283928	0.998034	0.88363	0.9847	0.015399	1.01073	0.712064	0.998464	0.0161667	1.01127	0.986876	0.998566	0.00116857	1.00081	0.806256	1	-0.0149981	0.989658	0.187577	0.945377	0.065423	1.04639	0.7334	1	0.0350259	1.02458	31.5437	31.4275	31.5468	31.4409	31.4769	31.5651	31.4844	31.4312	31.4511	31.4238	31.5874
Q8R0Y6	Cytosolic 10-formyltetrahydrofolate dehydrogenase	Aldh1l1	0.383781	0.931341	-0.0561851	0.961804	0.849521	0.992151	-0.0148463	0.989762	0.632982	0.956465	0.0413387	1.02907	0.11713	0.664086	0.21922	1.1641	0.844447	0.999454	-0.0180511	0.987566	0.238729	0.910643	-0.0953	0.936078	0.503827	0.977656	-0.0772489	0.947863	0.427179	0.927613	0.0987867	1.07087	0.150961	1	-0.197682	0.87195	31.494	31.4418	31.5083	31.5154	31.6215	31.5891	31.4818	31.6611	31.3767	31.3053	31.4669
Q60737	Casein kinase II subunit alpha	Csnk2a1	0.525028	0.942921	0.0444081	1.03126	0.764258	0.993327	0.019056	1.0133	0.720275	0.974749	-0.0253521	0.982581	0.829793	0.964325	-0.032052	0.978028	0.244672	1	0.0816822	1.05825	0.350471	0.956491	0.0607967	1.04304	0.685686	1	-0.0208855	0.985628	0.252683	0.865626	0.131478	1.09542	0.129838	1	0.142645	1.10393	31.6357	31.6259	31.6189	31.4786	31.516	31.7325	31.5132	31.4229	31.5422	31.5822	31.7304
Q9QXY6	EH domain-containing protein 3	Ehd3	0.149159	0.835133	-0.11172	0.925484	0.19688	0.904044	-0.122029	0.918895	0.891464	0.991535	-0.0103085	0.99288	0.742476	0.956038	-0.0353041	0.975826	0.576312	1	-0.0527496	0.964097	0.711473	0.980221	-0.0463943	0.968353	0.95193	0.997264	0.00635529	1.00441	0.347743	0.927772	0.090291	1.06458	0.355007	1	0.13195	1.09577	31.4371	31.6791	31.4585	31.4479	31.592	31.7511	31.6643	31.5197	31.5597	31.7563	31.6574
P61027	Ras-related protein Rab-10	Rab10	0.0430119	0.78756	-0.152762	0.899527	0.678049	0.984261	-0.0401992	0.972521	0.173632	0.852455	0.112563	1.08115	0.0413406	0.722433	0.140317	1.10215	0.324076	1	-0.0884666	0.940522	0.970087	0.996804	0.00559362	1.00388	0.515622	0.980902	0.0940603	1.06737	0.314802	0.941158	0.072916	1.05184	0.878915	1	0.0266593	1.01865	31.2912	31.5399	31.4397	31.3156	31.6181	31.5681	31.5872	31.5377	31.4356	31.4372	31.4683
P57780	Alpha-actinin-4	Actn4	0.860583	0.987222	0.0106301	1.0074	0.447189	0.970252	0.0640843	1.04542	0.441491	0.945141	0.0534542	1.03775	0.248281	0.96327	0.0218811	1.01528	0.287809	1	0.0836569	1.0597	0.180025	0.888318	0.15816	1.11586	0.436985	0.980979	0.0745029	1.053	0.115282	0.882754	0.103378	1.07429	0.222274	1	0.156	1.11419	31.5429	31.5541	31.7203	31.7344	31.6825	31.6962	31.5573	31.5427	31.6579	31.6557	31.6792
P59999	Actin-related protein 2/3 complex subunit 4	Arpc4	0.546645	0.940409	-0.0520622	0.964557	0.264511	0.944939	0.080088	1.05708	0.0944872	0.824645	0.13215	1.09593	0.931067	0.985451	0.0104151	1.00725	0.329384	1	-0.115819	0.922858	0.328218	0.9152	0.0974884	1.06991	0.0790218	0.89354	0.213307	1.15934	0.484055	0.933186	-0.0988518	0.933776	0.226434	1	0.10404	1.07478	31.5559	31.5679	31.4856	31.3237	31.3736	31.5784	31.7124	31.5615	31.4507	31.4361	31.4951
O88712	C-terminal-binding protein 1	Ctbp1	0.154284	0.838111	-0.104366	0.930214	0.109983	0.919877	-0.0911564	0.93877	0.802329	0.986916	0.0132095	1.0092	0.940627	0.992025	0.00667763	1.00464	0.509993	1	-0.063242	0.957111	0.541758	0.974181	-0.0456778	0.968835	0.79774	1	0.0175641	1.01225	0.504843	0.952997	0.0729647	1.05188	0.0794325	1	0.0838512	1.05984	31.3591	31.5147	31.4134	31.2925	31.6217	31.4645	31.5868	31.432	31.3917	31.5476	31.5252
P63158	High mobility group protein B1	Hmgb1	0.379915	0.939257	-0.0447791	0.969438	0.331027	0.947348	0.079532	1.05668	0.110681	0.830416	0.124311	1.08999	0.242341	0.719051	0.201436	1.14984	0.994483	1	-0.000481288	0.999666	0.494185	0.95703	0.0724131	1.05147	0.490787	0.977754	0.0728944	1.05182	0.279311	0.934053	0.079524	1.05667	0.752609	1	-0.0490176	0.966594	31.3848	31.516	31.3552	31.4332	31.5011	31.5285	31.3616	31.5201	31.4241	31.4353	31.1914
Q6PER3	Microtubule-associated protein RP/EB family member 3	Mapre3	0.353382	0.95107	-0.031338	0.978512	0.0424964	0.950404	-0.0647964	0.95608	0.254151	0.956339	-0.0334583	0.977075	0.791581	0.973674	0.0184832	1.01289	0.252317	0.996827	-0.0273056	0.981251	0.0286985	0.904835	-0.0953916	0.936018	0.0317794	0.976897	-0.068086	0.953903	0.317401	0.963313	0.0514193	1.03628	0.343441	1	-0.0351499	0.97593	31.4102	31.3069	31.3748	31.3506	31.3658	31.4799	31.3652	31.3809	31.3681	31.3818	31.4269
P56379	ATP synthase subunit ATP5MPL, mitochondrial	Atp5mpl	0.676114	0.887766	-0.191759	0.875537	0.221832	0.780838	-0.507795	0.703297	0.532122	0.832242	-0.316035	0.803274	0.873219	0.935275	0.1703	1.12529	0.89854	0.997504	0.0854155	1.06099	0.132567	0.567094	-0.554843	0.680731	0.377442	0.887423	-0.640259	0.641598	0.596821	0.857187	0.48648	1.40102	0.680019	1	-0.324078	0.798809	30.1425	30.6676	30.1111	30.6397	31.2429	30.5048	30.2258	31.5021	29.4343	29.8367	31.5705
Q9EQF6	Dihydropyrimidinase-related protein 5	Dpysl5	0.601324	0.940101	0.0499967	1.03526	0.367101	0.951175	-0.0799594	0.946084	0.235504	0.843443	-0.129956	0.913859	0.428751	0.841909	0.115428	1.0833	0.212371	1	0.12106	1.08753	0.105304	0.839553	-0.172485	0.887313	0.0548321	0.855187	-0.293545	0.815895	0.087178	0.702062	0.253698	1.19226	0.322757	1	-0.155276	0.897961	31.535	31.4564	31.3607	31.423	31.574	31.518	31.1655	31.4305	31.2808	31.3167	31.5444
P16054	Protein kinase C epsilon type	Prkce	0.270172	0.907899	0.069615	1.04944	0.321091	0.921528	0.114489	1.08259	0.680847	0.95621	0.0448738	1.03159	0.272536	0.874363	-0.0748863	0.949417	0.301405	1	0.101013	1.07253	0.149047	0.814545	0.225726	1.16937	0.44558	0.969392	0.124714	1.09029	0.618736	0.965468	0.0604973	1.04283	0.203218	1	0.260098	1.19756	31.4577	31.5086	31.5189	31.432	31.4011	31.4908	31.5092	31.2339	31.4133	31.4989	31.5428
Q9Z1P6	NADH dehydrogenase [ubiquinone] 1 alpha subcomplex subunit 7	Ndufa7	0.934242	0.986668	0.00650883	1.00452	0.582521	0.984461	0.0365744	1.02568	0.706365	0.971235	0.0300655	1.02106	0.286054	0.802894	0.122846	1.08888	0.202914	1	0.0834897	1.05958	0.60775	0.974015	0.0517019	1.03649	0.714062	1	-0.0317879	0.978207	0.0363815	0.696886	0.222422	1.16669	0.566169	1	0.0677888	1.04811	31.4683	31.3411	31.4054	31.5146	31.6332	31.4853	31.3701	31.2975	31.343	31.4788	31.3941
P20917	Myelin-associated glycoprotein	Mag	0.0449307	0.64322	-0.301068	0.811651	0.311496	0.874756	-0.346708	0.786376	0.880595	0.974886	-0.0456402	0.96886	0.943395	0.985919	-0.0246439	0.983063	0.161199	0.930189	-0.320388	0.800854	0.466823	0.871344	-0.380026	0.768424	0.910683	1	-0.0596377	0.959505	0.624498	0.935423	-0.121915	0.918967	0.823824	1	-0.156909	0.896945	31.1016	31.3017	31.2726	31.0837	31.4239	31.4117	31.2948	31.8755	31.4488	31.7498	31.1352
Q8R5H6	Wiskott-Aldrich syndrome protein family member 1	Wasf1	0.756935	0.963689	-0.0250755	0.982769	0.744869	0.985156	0.0473007	1.03333	0.5559	0.935295	0.0723763	1.05145	0.681371	0.96391	-0.0241451	0.983403	0.771919	0.999878	-0.031573	0.978353	0.606884	0.941362	0.105151	1.07561	0.487979	0.969628	0.136724	1.09941	0.399871	0.936338	0.082894	1.05914	0.346048	1	0.243763	1.18408	31.4752	31.1842	31.4699	31.2956	31.4816	31.3805	31.4193	31.2316	31.3936	31.4599	31.4504
O35526	Syntaxin-1A	Stx1a	0.25635	0.937047	0.047561	1.03352	0.137106	0.884265	-0.185987	0.879047	0.0425514	0.694603	-0.233548	0.85054	0.666407	0.889445	-0.105194	0.92968	0.767768	0.99981	0.0166804	1.01163	0.0121259	0.568812	-0.302437	0.810881	0.0105392	0.740448	-0.319118	0.80156	0.64346	0.992865	-0.025926	0.98219	0.261682	1	-0.23985	0.846834	31.2585	31.2287	31.1945	31.1062	31.1185	31.1492	31.0895	31.2207	31.1691	31.0294	31.4487
Q9JIA1	Leucine-rich glioma-inactivated protein 1	Lgi1	0.944498	0.989684	-0.00471745	0.996735	0.714591	0.991529	-0.0163774	0.988712	0.84995	0.990172	-0.01166	0.99195	0.918009	0.987196	-0.00837517	0.994212	0.975868	1	0.00337219	1.00234	0.8594	0.992961	-0.0104777	0.992764	0.897137	1	-0.0138499	0.990446	0.94013	1	0.0100222	1.00697	0.950992	0.999989	0.00454744	1.00316	31.3555	31.414	31.4183	31.2831	31.3906	31.3663	31.5568	31.2948	31.2537	31.4578	31.3159
Q9Z204	Heterogeneous nuclear ribonucleoproteins C1/C2	Hnrnpc	0.404069	0.8064	0.257362	1.19529	0.969908	0.998516	-0.00246687	0.998292	0.343693	0.790907	-0.259829	0.835187	0.283875	0.506531	-0.75058	0.594365	0.305438	1	-0.0746625	0.949564	0.94375	0.995037	-0.00732358	0.994937	0.511571	0.976918	0.0673389	1.04778	0.13605	0.686371	-0.787559	0.579324	0.799157	1	0.0303599	1.02127	31.5045	31.5107	31.344	31.4547	31.2407	30.2064	31.5921	31.4748	31.4665	31.4863	31.462
P23818	Glutamate receptor 1	Gria1	0.927669	0.987332	-0.00662498	0.995418	0.238526	0.870685	0.286485	1.21966	0.188427	0.718347	0.29311	1.22528	0.159742	0.91716	-0.0405512	0.972283	0.988561	1	0.00170072	1.00118	0.119285	0.568096	0.517251	1.43123	0.140735	0.787922	0.515551	1.42954	0.938259	1	-0.0116854	0.991933	0.203376	1	0.544416	1.45843	31.5017	31.4997	31.6039	31.5576	31.553	31.5277	31.7547	31.3894	31.5119	31.5944	31.5674
P62746	Rho-related GTP-binding protein RhoB	Rhob	0.783022	0.973465	-0.018355	0.987358	0.982544	0.999838	0.00163136	1.00113	0.519921	0.977093	0.0199863	1.01395	0.0993032	0.847532	0.0784283	1.05587	0.559276	1	-0.0560703	0.961881	0.459601	0.945105	-0.0750453	0.949312	0.546826	1	-0.0189749	0.986934	0.95508	1	0.000754038	1.00052	0.0966579	1	-0.0966492	0.935203	31.4725	31.1466	31.3878	31.427	31.3735	31.381	31.3781	31.3597	31.3918	31.3253	31.2724
P63005	Platelet-activating factor acetylhydrolase IB subunit alpha	Pafah1b1	0.0800677	0.878958	-0.0726163	0.950912	0.778142	0.991276	-0.0140779	0.990289	0.20205	0.925785	0.0585384	1.04141	0.615675	0.90945	0.0617151	1.04371	0.165991	1	-0.0719484	0.951352	0.693077	0.994548	-0.0155277	0.989295	0.19683	0.978199	0.0564206	1.03988	0.319889	0.963249	0.0505444	1.03566	0.614236	1	0.0452499	1.03186	31.4427	31.3043	31.392	31.3973	31.4636	31.5105	31.4497	31.4806	31.3792	31.3231	31.5275
Q8K183	Pyridoxal kinase	Pdxk	0.273222	0.869792	-0.093681	0.937129	0.0392383	0.87914	-0.170164	0.888742	0.380718	0.921181	-0.0764832	0.948367	0.671761	0.943798	-0.0385218	0.973652	0.535792	1	-0.0802771	0.945876	0.161742	0.847634	-0.182068	0.881439	0.513492	0.975904	-0.101791	0.931876	0.826014	0.99107	0.0356305	1.025	0.835899	1	-0.0276384	0.981025	31.3943	31.4797	31.3892	31.3037	31.4341	31.5795	31.3073	31.6729	31.4333	31.516	31.5747
Q9CPP6	NADH dehydrogenase [ubiquinone] 1 alpha subcomplex subunit 5	Ndufa5	0.10056	0.778095	0.186919	1.13833	0.741217	0.993392	-0.0236223	0.98376	0.0686378	0.73833	-0.210542	0.864213	0.27798	0.737345	-0.181927	0.881525	0.282695	1	0.170857	1.12573	0.571226	0.96571	-0.058761	0.960088	0.216428	0.897335	-0.229618	0.852861	0.736513	0.971251	-0.0710773	0.951927	0.361713	1	-0.118769	0.920973	31.4577	31.462	31.4681	31.5915	31.1423	31.3882	31.0823	31.4069	31.5198	31.4385	31.4559
P23506	Protein-L-isoaspartate(D-aspartate) O-methyltransferase	Pcmt1	0.325208	0.925095	0.0610234	1.04321	0.27417	0.943752	0.0795617	1.0567	0.779171	0.97983	0.0185383	1.01293	0.600614	0.936375	-0.0411539	0.971877	0.512428	1	0.0649675	1.04606	0.255408	0.90716	0.123301	1.08922	0.595695	0.982538	0.0583331	1.04126	0.976242	1	-0.00303555	0.997898	0.421367	1	0.0964514	1.06914	31.4581	31.4096	31.5924	31.4341	31.3767	31.4447	31.4716	31.4952	31.2743	31.3943	31.5094
P70175	Disks large homolog 3	Dlg3	0.931496	0.986964	-0.00644827	0.99554	0.340517	0.939638	0.102376	1.07354	0.345796	0.884675	0.108825	1.07835	0.5102	0.88474	-0.0811834	0.945282	0.725698	1	-0.0417182	0.971497	0.137257	0.827721	0.193778	1.14376	0.196035	0.891356	0.235497	1.17731	0.635208	0.959906	-0.0754197	0.949066	0.215193	1	0.24126	1.18202	31.5088	31.4819	31.4794	31.5037	31.4367	31.4726	31.6631	31.3106	31.6164	31.4352	31.6364
Q9CQI6	Coactosin-like protein	Cotl1	0.0351652	0.791834	-0.147779	0.902639	0.0660065	0.898092	0.132318	1.09605	0.00231802	0.589207	0.280096	1.21428	0.10028	0.548686	0.30112	1.2321	0.271238	1	-0.0896848	0.939728	0.0550531	0.82828	0.176396	1.13006	0.0205902	0.835716	0.266081	1.20254	0.169341	0.856305	0.126576	1.0917	0.418021	1	0.0915368	1.0655	31.4568	31.4696	31.4179	31.5725	31.6872	31.7186	31.6746	31.4898	31.5647	31.5039	31.2997
Q68FF6	ARF GTPase-activating protein GIT1	Git1	0.889648	0.988467	0.00980225	1.00682	0.364436	0.972619	-0.0576187	0.960849	0.335369	0.925867	-0.067421	0.954343	0.106445	0.64141	-0.233377	0.850641	0.636488	1	-0.0377808	0.974152	0.934376	0.994472	0.00543594	1.00378	0.537663	0.992577	0.0432167	1.03041	0.0970711	0.797137	-0.168326	0.889875	0.247349	1	0.108268	1.07793	31.3985	31.5345	31.5222	31.3758	31.3653	31.3286	31.5024	31.4296	31.6139	31.6612	31.4995
Q80YA9	Connector enhancer of kinase suppressor of ras 2	Cnksr2	0.759951	0.958277	-0.0333908	0.977121	0.372184	0.898572	0.207414	1.15462	0.238776	0.778525	0.240805	1.18165	0.360068	0.879824	-0.0768375	0.948134	0.817004	0.998987	-0.0408904	0.972055	0.199959	0.722262	0.411676	1.33023	0.156359	0.841478	0.452567	1.36847	0.857689	0.989792	-0.0281061	0.980707	0.200641	1	0.501298	1.41549	31.662	31.824	31.7819	31.4251	31.7462	31.6334	31.8533	31.5074	31.793	31.7995	31.7338
Q9DB05	Alpha-soluble NSF attachment protein	Napa	0.797029	0.97542	0.0169653	1.01183	0.471212	0.959244	0.0768877	1.05474	0.558575	0.945444	0.0599224	1.04241	0.0643628	0.732828	-0.1356	0.910291	0.713788	0.999866	-0.0298189	0.979543	0.314332	0.899277	0.160452	1.11764	0.258833	0.911922	0.190271	1.14098	0.172001	0.84812	-0.144286	0.904827	0.365175	1	0.181585	1.13413	31.3524	31.3863	31.4806	31.3214	31.2507	31.3125	31.5318	31.4217	31.3242	31.3984	31.436
Q922S4	cGMP-dependent 3,5-cyclic phosphodiesterase	Pde2a	0.891591	0.986318	0.0127419	1.00887	0.169401	0.904231	-0.123293	0.91809	0.15322	0.824654	-0.136035	0.910017	0.876823	0.975914	0.0211601	1.01478	0.441093	1	0.0712159	1.0506	0.193463	0.871464	-0.169616	0.889079	0.0695893	0.879988	-0.240832	0.846257	0.080041	0.735184	0.224419	1.16831	0.789617	1	-0.0375729	0.974293	31.4613	31.2016	31.3901	31.4168	31.5686	31.4101	31.3237	31.1685	31.3026	31.3774	31.5591
Q8R191	Synaptogyrin-3	Syngr3	0.181724	0.861235	0.0897928	1.06422	0.814625	0.991334	-0.0184023	0.987326	0.193403	0.869919	-0.108195	0.927748	0.631262	0.89842	-0.0759945	0.948688	0.382373	1	0.0851777	1.06082	0.642787	0.980479	-0.0444845	0.969636	0.315076	0.958203	-0.129662	0.914045	0.675288	0.980798	0.0483395	1.03407	0.972677	0.999646	-0.00532818	0.996314	31.2885	31.2645	31.1449	31.1688	31.1236	31.1881	31.2649	31.021	31.0368	31.1003	31.3634
Q01768	Nucleoside diphosphate kinase B	Nme2	0.285677	0.906416	0.0716937	1.05095	0.517906	0.953753	-0.0902921	0.939333	0.20963	0.814641	-0.161986	0.893794	0.744806	0.946028	-0.0423622	0.971064	0.142481	1	0.111422	1.08029	0.535932	0.914233	-0.130313	0.913633	0.272936	0.894472	-0.241735	0.845728	0.844017	0.990142	0.0206976	1.01445	0.512671	1	-0.178675	0.883514	31.2938	31.4941	31.435	31.3296	31.217	31.4408	31.2346	31.3591	31.3308	31.3522	31.3902
P12970	60S ribosomal protein L7a	Rpl7a	0.138147	0.825357	-0.12191	0.91897	0.687524	0.968183	-0.0728572	0.950753	0.769615	0.960857	0.0490524	1.03459	0.824057	0.97458	0.0192938	1.01346	0.0778136	0.968627	-0.182557	0.88114	0.694001	0.959272	-0.113666	0.924237	0.813058	0.995954	0.0688915	1.04891	0.111931	0.781276	-0.188824	0.87732	0.71476	1	-0.139227	0.908006	31.4416	31.5861	31.4742	31.4431	31.5188	31.4709	31.7315	31.7628	31.5568	31.548	31.4031
P04925	Major prion protein	Prnp	0.22058	0.766279	0.275272	1.21022	0.579551	0.946437	-0.118368	0.921229	0.150293	0.647579	-0.393641	0.761206	0.251289	0.469408	-0.77469	0.584514	0.636183	1	0.0844816	1.06031	0.769731	0.980371	-0.0551262	0.96251	0.583087	0.979073	-0.139608	0.907766	0.0824217	0.699905	-0.59374	0.662623	0.926176	1	0.0413421	1.02907	31.3988	31.6679	31.5333	31.5556	30.7686	31.0461	31.6372	31.1823	31.6838	31.2173	32.1468
Q80Z24	Neuronal growth regulator 1	Negr1	0.714354	0.938525	0.0790728	1.05634	0.424463	0.90236	-0.208941	0.865172	0.306871	0.776793	-0.288014	0.819029	0.548949	0.762926	-0.325152	0.798214	0.782401	1	0.0846685	1.06044	0.559877	0.90911	-0.178587	0.883568	0.536705	0.946063	-0.263255	0.833206	0.642986	0.914075	-0.194005	0.874176	0.799071	1	-0.132108	0.912497	31.046	31.503	31.3624	31.271	30.9451	31.2552	31.8493	30.9753	31.0578	30.9976	31.853
Q8BUV3	Gephyrin	Gphn	0.417358	0.953669	-0.0354039	0.975759	0.351159	0.972068	-0.0578538	0.960692	0.679087	0.977301	-0.0224499	0.984559	0.207769	0.880176	-0.0688019	0.953429	0.539831	1	-0.0431989	0.970501	0.701145	0.991971	-0.0347474	0.976203	0.926991	0.998809	0.00845146	1.00588	0.980554	0.999894	-0.00167243	0.998841	0.490315	1	0.0755809	1.05379	31.2555	31.3129	31.194	31.1742	31.2868	31.2503	31.2996	31.1767	31.3344	31.3046	31.3701
Q8K0S0	Phytanoyl-CoA hydroxylase-interacting protein	Phyhip	0.374465	0.943114	-0.0410066	0.971977	0.394221	0.964373	0.0682338	1.04843	0.189677	0.870198	0.10924	1.07866	0.604237	0.931599	-0.0435982	0.970232	0.21058	1	-0.0758921	0.948755	0.191721	0.899745	0.135241	1.09828	0.102469	0.899805	0.211133	1.1576	0.417801	0.951391	-0.0735633	0.950288	0.2151	1	0.181168	1.1338	31.4147	31.3879	31.3971	31.3937	31.3376	31.4529	31.562	31.4576	31.3868	31.3965	31.4812
O88343	Electrogenic sodium bicarbonate cotransporter 1	Slc4a4	0.637054	0.951424	-0.0403206	0.972439	0.927096	0.993017	-0.0145355	0.989975	0.856138	0.978008	0.0257851	1.01803	0.437545	0.796328	0.163478	1.11998	0.98559	1	0.00202115	1.0014	0.766672	0.981189	-0.063989	0.956615	0.767109	0.993178	-0.0660102	0.955276	0.980606	1	0.00337728	1.00234	0.461114	1	-0.226111	0.854937	31.3001	31.5867	31.3687	31.4369	31.5589	31.372	31.5643	31.5246	31.2973	31.16	31.4439
Q9CWF2	Tubulin beta-2B chain	Tubb2b	0.814548	0.956245	0.0413228	1.02906	0.740241	0.973131	-0.0773749	0.947781	0.593579	0.911123	-0.118698	0.921019	0.900372	0.963409	0.0556097	1.0393	0.418754	1	0.199137	1.14801	0.904487	0.992783	-0.0357653	0.975514	0.440984	0.92385	-0.234903	0.849742	0.177455	0.692452	0.349194	1.27385	0.896467	1	0.0586812	1.04151	30.8802	30.6543	31.2054	30.9984	31.1478	31.0577	30.4753	30.7873	30.9981	31.4373	30.657
Q8K021	Secretory carrier-associated membrane protein 1	Scamp1	0.524404	0.952917	-0.036077	0.975303	0.703447	0.98634	0.0354997	1.02491	0.374966	0.925129	0.0715767	1.05086	0.0290859	0.799034	-0.0948381	0.936377	0.260249	1	-0.0923093	0.93802	0.480822	0.936619	0.0902106	1.06453	0.154154	0.906761	0.18252	1.13486	0.124779	0.885859	-0.0955327	0.935927	0.247794	1	0.181825	1.13432	31.3905	31.195	31.3857	31.3746	31.2995	31.3309	31.3706	31.3837	31.4779	31.4049	31.4152
P54071	Isocitrate dehydrogenase [NADP], mitochondrial	Idh2	0.736597	0.958624	-0.0278806	0.98086	0.394239	0.960022	-0.0704011	0.952373	0.561581	0.953582	-0.0425205	0.970957	0.788661	0.973383	0.021965	1.01534	0.988459	1	-0.00177066	0.998773	0.357255	0.925825	-0.0872815	0.941295	0.454095	0.98217	-0.0855109	0.942451	0.808395	0.992437	-0.0314004	0.97847	0.184889	1	-0.138876	0.908226	31.1091	31.2761	31.1378	31.3773	31.2418	31.2264	31.0959	31.4111	31.2894	31.2836	31.1407
P97797	Tyrosine-protein phosphatase non-receptor type substrate 1	Sirpa	0.896163	0.987009	-0.0064888	0.995512	0.0613876	0.894063	-0.135889	0.910109	0.0122613	0.802488	-0.1294	0.914211	0.152437	0.897547	-0.0497437	0.966108	0.871998	0.99871	-0.0105661	0.992703	0.0811626	0.821702	-0.193071	0.874742	0.0357141	0.898066	-0.182505	0.881172	0.0419207	0.950354	0.0578213	1.04089	0.394289	1	-0.0749397	0.949382	31.3064	31.1086	31.3126	31.1715	31.2747	31.2572	31.1963	31.2323	31.1958	31.3359	31.2955
Q9ERS2	NADH dehydrogenase [ubiquinone] 1 alpha subcomplex subunit 13	Ndufa13	0.716092	0.952343	-0.0469533	0.967978	0.517936	0.969808	-0.0694627	0.952993	0.841432	0.978835	-0.0225094	0.984519	0.100658	0.654667	0.219271	1.16414	0.49596	1	0.107326	1.07723	0.602139	0.959635	-0.0763702	0.948441	0.255039	0.910262	-0.183696	0.880444	0.13223	0.707508	0.276668	1.21139	0.403322	1	-0.126299	0.916179	31.2341	31.2771	31.3455	31.603	31.599	31.5567	31.1509	31.2528	31.4999	31.431	31.2863
Q8R5C5	Beta-centractin	Actr1b	0.455504	0.952875	0.0353809	1.02483	0.524576	0.974135	-0.0483368	0.967051	0.271014	0.907188	-0.0837177	0.943623	0.222718	0.884233	-0.0662327	0.955129	0.0513177	1	0.0807451	1.05756	0.891761	0.993065	-0.0146294	0.989911	0.385306	0.976036	-0.0953744	0.936029	0.00248121	0.781155	0.142585	1.10388	0.442939	1	0.113443	1.08181	31.386	31.287	31.3767	31.3543	31.4033	31.399	31.2657	31.2741	31.236	31.5053	31.4296
P62835	Ras-related protein Rap-1A	Rap1a	0.928654	0.986528	-0.00646772	0.995527	0.794567	0.989929	-0.0347419	0.976206	0.82863	0.977148	-0.0282742	0.980593	0.318645	0.864217	-0.083847	0.943538	0.701653	1	-0.04245	0.971005	0.877313	0.98824	-0.0336755	0.976928	0.970717	0.997288	0.00877444	1.0061	0.560989	0.953361	-0.0846424	0.943018	0.977758	0.999968	0.00797908	1.00555	31.4531	31.4601	31.4909	31.3829	31.4418	31.363	31.3739	31.6822	31.4051	31.5363	31.4362
P45376	Aldo-keto reductase family 1 member B1	Akr1b1	0.409124	0.941995	-0.0434257	0.970348	0.664354	0.992682	-0.0259982	0.982141	0.709993	0.97927	0.0174274	1.01215	0.865605	0.973287	0.0225229	1.01573	0.679134	0.999328	-0.0288385	0.980209	0.845333	0.992305	-0.014808	0.989788	0.77929	1	0.0140305	1.00977	0.962653	1	-0.00315126	0.997818	0.901358	1	-0.0116437	0.991962	31.2052	31.2439	31.3816	31.1802	31.224	31.3645	31.3225	31.3237	31.246	31.1777	31.3658
P70168	Importin subunit beta-1	Kpnb1	0.156723	0.835464	0.108435	1.07806	0.142881	0.903319	0.117005	1.08448	0.842567	0.991397	0.00856972	1.00596	0.628331	0.934561	-0.043189	0.970507	0.502261	1	0.0720406	1.0512	0.248481	0.90821	0.115116	1.08306	0.436028	0.991412	0.0430756	1.03031	0.96745	1	-0.00282955	0.998041	0.241754	1	0.0834351	1.05954	31.6056	31.3126	31.6055	31.4756	31.4033	31.3761	31.4897	31.3351	31.3528	31.3578	31.508
P05132	cAMP-dependent protein kinase catalytic subunit alpha	Prkaca	0.00828265	0.794883	0.132952	1.09654	0.849464	0.992073	-0.0151129	0.989579	0.0823338	0.803876	-0.148065	0.90246	0.767351	0.965848	-0.024827	0.982938	0.065857	0.998551	0.13779	1.10022	0.267624	0.914177	-0.0924333	0.937939	0.0628926	0.872681	-0.230223	0.852503	0.97744	1	-0.00229804	0.998408	0.140863	1	-0.207694	0.86592	31.3287	31.3523	31.3423	31.3606	31.1777	31.2456	31.1058	31.2809	31.2551	31.3015	31.1714
Q8C1B7	Septin-11	Septin11	0.96512	0.993037	0.00356789	1.00248	0.0434721	0.873621	-0.191635	0.875613	0.0347718	0.734641	-0.195203	0.87345	0.602653	0.896304	-0.0818005	0.944878	0.895508	0.999145	0.0109584	1.00762	0.0179036	0.669812	-0.259846	0.835177	0.0468201	0.864085	-0.270804	0.828857	0.229015	0.846614	0.1469	1.10719	0.757872	1	-0.0421041	0.971237	31.3488	31.1621	31.0886	31.1792	31.2473	31.3112	31.0358	31.276	31.0852	31.2313	31.4908
Q91V92	ATP-citrate synthase	Acly	0.567826	0.951901	0.0359871	1.02526	0.0012141	0.822292	0.1891	1.14005	0.0274524	0.786588	0.153112	1.11197	0.0781999	0.639951	0.237072	1.1786	0.46866	1	0.0629209	1.04458	0.022018	0.830684	0.16006	1.11733	0.305099	0.973072	0.0971394	1.06965	0.407419	0.919875	0.0992762	1.07124	0.540119	1	-0.0406564	0.972213	31.5947	31.4942	31.5577	31.5788	31.5292	31.6307	31.5465	31.5634	31.3321	31.294	31.3918
P09405	Nucleolin	Ncl	0.125903	0.806358	-0.153548	0.899037	0.544888	0.977095	-0.0476429	0.967516	0.32031	0.885378	0.105905	1.07617	0.157721	0.641203	0.286495	1.21967	0.532717	1	-0.0733426	0.950433	0.37051	0.926164	-0.0878309	0.940936	0.918466	0.998946	-0.0144882	0.990008	0.245318	0.812722	0.19972	1.14848	0.52155	1	-0.101263	0.932217	31.3395	31.3916	31.3324	31.2982	31.5677	31.6599	31.5253	31.5108	31.2062	31.4485	31.2061
P62823	Ras-related protein Rab-3C	Rab3c	0.341573	0.879983	0.0877872	1.06274	0.460705	0.917156	0.171283	1.12606	0.684628	0.941659	0.0834961	1.05958	0.557451	0.837533	-0.16522	0.891792	0.540102	1	0.0766201	1.05454	0.313533	0.825025	0.325927	1.25347	0.428266	0.916195	0.249307	1.18864	0.92814	1	-0.0141859	0.990215	0.368526	1	0.400341	1.31982	31.3596	31.4844	31.3224	31.2061	31.1129	31.3808	31.4175	31.1449	31.2206	31.2169	31.6073
P58771	Tropomyosin alpha-1 chain	Tpm1	0.907655	0.987857	0.0085989	1.00598	0.472846	0.970418	-0.0667814	0.954766	0.214983	0.90849	-0.0753803	0.949092	0.211647	0.796042	-0.119587	0.920451	0.865994	0.999291	-0.0187225	0.987106	0.648905	0.968171	-0.0646318	0.956189	0.634478	0.994531	-0.0459092	0.968679	0.963301	1	-0.00273768	0.998104	0.574021	1	0.07094	1.0504	31.4746	31.1916	31.539	31.3783	31.3297	31.4416	31.3571	31.3647	31.4433	31.4702	31.5402
Q62167;P16381	ATP-dependent RNA helicase DDX3X;Putative ATP-dependent RNA helicase Pl10	Ddx3x;D1Pas1	0.0188893	0.781	0.150748	1.11014	0.614773	0.976604	0.0525013	1.03706	0.297302	0.888736	-0.0982468	0.934168	0.0411217	0.643295	-0.195882	0.873039	0.118766	0.999379	0.151456	1.11069	0.4252	0.909934	0.118299	1.08545	0.816146	1	-0.0331567	0.97728	0.715634	0.993769	0.0287069	1.0201	0.316823	1	0.191432	1.1419	31.711	31.6648	31.7628	31.5762	31.5653	31.5251	31.4142	31.536	31.5993	31.7054	31.7768
Q61207	Prosaposin	Psap	0.653015	0.951089	-0.0355067	0.975689	0.0424296	0.881704	0.153666	1.11239	0.0367427	0.747507	0.189173	1.14011	0.263293	0.736139	0.179077	1.13216	0.896647	0.996828	-0.0127977	0.991169	0.109166	0.827997	0.183106	1.13533	0.178521	0.899812	0.195904	1.14544	0.89812	0.996715	-0.0195726	0.986525	0.981434	1	-0.00274595	0.998098	31.4076	31.5691	31.4663	31.5537	31.4089	31.6369	31.5072	31.7073	31.413	31.3665	31.3213
P35436	Glutamate receptor ionotropic, NMDA 2A	Grin2a	0.60649	0.92606	0.0834831	1.05957	0.36068	0.883508	0.297492	1.22901	0.478554	0.843629	0.214009	1.15991	0.206424	0.566351	-0.406657	0.754369	0.708134	1	-0.0657673	0.955437	0.203791	0.659506	0.562019	1.47633	0.167855	0.794912	0.627787	1.54519	0.218086	0.723201	-0.331457	0.794734	0.225642	1	0.702987	1.62787	31.7096	31.6794	31.8144	31.4351	31.5739	31.1807	31.9459	31.557	31.6233	31.6842	31.8837
P27659	60S ribosomal protein L3	Rpl3	0.591054	0.951121	0.0310958	1.02179	0.875685	0.991383	-0.0228433	0.984291	0.660121	0.950969	-0.0539391	0.963303	0.437274	0.900368	-0.0572653	0.961084	0.806222	1	-0.0198746	0.986318	0.761476	0.974461	-0.0715961	0.951585	0.815119	0.999407	-0.0517216	0.964784	0.0242684	0.897009	-0.0808083	0.945528	0.798819	1	-0.0752646	0.949168	31.6099	31.6689	31.529	31.4079	31.4526	31.4961	31.5704	31.5508	31.5443	31.587	31.4762
Q62093	Serine/arginine-rich splicing factor 2	Srsf2	0.0420372	0.588258	0.355109	1.27908	0.105203	0.809755	0.308575	1.23848	0.791918	0.964147	-0.0465343	0.968259	0.989848	0.996493	0.00617409	1.00429	0.0284399	0.890456	0.341552	1.26712	0.272832	0.829285	0.259879	1.19738	0.680282	0.982083	-0.0816733	0.944961	0.756883	0.967911	0.0852114	1.06084	0.993749	1	-0.00263596	0.998175	31.6507	31.3041	31.442	31.6341	30.872	31.5355	31.0554	31.1249	31.1753	30.9239	31.4712
P48758	Carbonyl reductase [NADPH] 1	Cbr1	0.962756	0.996547	0.00122299	1.00085	0.43078	0.990657	0.0245029	1.01713	0.380286	0.972733	0.02328	1.01627	0.773179	0.984124	0.0129471	1.00901	0.24258	1	0.031826	1.02231	0.123287	0.941404	0.0619946	1.04391	0.254063	0.998824	0.0301685	1.02113	0.201674	0.968389	0.0422945	1.02975	0.162357	1	0.059516	1.04212	31.2613	31.3476	31.2718	31.3286	31.2925	31.3604	31.2832	31.2769	31.2924	31.2937	31.3334
Q99LC5	Electron transfer flavoprotein subunit alpha, mitochondrial	Etfa	0.724147	0.963548	0.0245298	1.01715	0.982865	0.998467	0.00282917	1.00196	0.850272	0.980175	-0.0217007	0.985071	0.80446	0.95705	0.0415735	1.02924	0.863792	0.999405	0.0194639	1.01358	0.81338	0.992724	-0.0444196	0.96968	0.732442	0.991306	-0.0638835	0.956685	0.788956	0.990123	-0.0275542	0.981082	0.606493	1	-0.133011	0.911926	31.4305	31.5386	31.2995	31.5248	31.404	31.4105	31.2903	31.5241	31.4901	31.5131	31.2183
Q61937	Nucleophosmin	Npm1	0.0493095	0.723886	0.22527	1.169	0.870563	0.990818	0.0219906	1.01536	0.0897093	0.76401	-0.203279	0.868574	0.425466	0.821872	-0.134429	0.91103	0.100148	1	0.114077	1.08228	0.426604	0.91109	-0.135103	0.910605	0.173303	0.894668	-0.24918	0.841375	0.547402	0.955127	-0.0737019	0.950197	0.394359	1	-0.188453	0.877546	31.7394	31.4688	31.3301	31.4387	31.3593	31.0902	31.3604	31.2475	31.2875	31.344	31.3744
P80315	T-complex protein 1 subunit delta	Cct4	0.23001	0.951648	0.0277784	1.01944	0.331324	0.972555	0.0443853	1.03124	0.646637	0.979264	0.0166069	1.01158	0.97393	0.996663	-0.00233078	0.998386	0.0449426	1	0.0416743	1.02931	0.224397	0.936812	0.0709063	1.05038	0.598542	1	0.029232	1.02047	0.39931	0.989502	-0.0177848	0.987748	0.872817	1	0.0137781	1.0096	31.3565	31.4447	31.4332	31.4437	31.3835	31.3786	31.4196	31.3722	31.4047	31.3202	31.4465
Q5M8N0	CB1 cannabinoid receptor-interacting protein 1	Cnrip1	0.771279	0.98384	0.012549	1.00874	0.490661	0.921917	0.163463	1.11997	0.47402	0.876117	0.150914	1.11027	0.704411	0.934602	-0.0488806	0.966686	0.510434	1	0.0385774	1.0271	0.367894	0.829645	0.322687	1.25066	0.428143	0.912044	0.28411	1.21766	0.743925	0.991189	0.0286636	1.02007	0.449627	1	0.361654	1.2849	31.1749	31.2241	31.2452	31.23	31.1678	31.2786	31.294	31.1127	31.1769	31.1751	31.3691
O55126	Protein NipSnap homolog 2	Nipsnap2	0.772319	0.975281	0.0156418	1.0109	0.762535	0.993166	0.0183483	1.0128	0.956629	0.994702	0.00270653	1.00188	0.987284	0.996024	-0.00155735	0.998921	0.88442	0.997011	-0.0122159	0.991568	0.935291	0.994383	-0.00666682	0.99539	0.940439	0.996691	0.00554911	1.00385	0.644792	0.985429	-0.0344172	0.976426	0.776545	1	-0.0273107	0.981248	31.3929	31.3075	31.2495	31.4527	31.336	31.2927	31.2873	31.4493	31.3098	31.3998	31.2321
Q60875	Rho guanine nucleotide exchange factor 2	Arhgef2	0.762966	0.963055	-0.0259614	0.982166	0.437413	0.94493	0.106	1.07624	0.233337	0.843525	0.131961	1.09578	0.766687	0.959555	-0.0337029	0.97691	0.901015	0.99542	-0.0175165	0.987932	0.225347	0.829199	0.224887	1.16869	0.133946	0.895342	0.242404	1.18296	0.976474	1	-0.00288169	0.998005	0.183786	1	0.273225	1.20851	31.3596	31.4653	31.5507	31.1778	31.4295	31.3957	31.5534	31.3407	31.3523	31.5442	31.3484
P35564	Calnexin	Canx	0.725953	0.977496	-0.013728	0.99053	0.0310927	0.824141	0.23032	1.17309	0.0176819	0.656717	0.244048	1.18431	0.0951815	0.664934	0.210476	1.15707	0.95716	0.9989	-0.00322978	0.997764	0.104742	0.761634	0.263199	1.20014	0.124104	0.875278	0.266429	1.20283	0.660647	0.985004	0.0358553	1.02516	0.62519	1	0.091808	1.0657	31.4509	31.4148	31.4445	31.4474	31.4508	31.4985	31.4679	31.517	31.3314	31.1983	31.33
P61089	Ubiquitin-conjugating enzyme E2 N	Ube2n	0.798846	0.985791	-0.0119724	0.991736	0.207356	0.947117	-0.0818153	0.944868	0.262638	0.920876	-0.0698429	0.952742	0.329201	0.860425	-0.0863056	0.941932	0.336948	1	-0.0577647	0.960752	0.23068	0.90489	-0.116632	0.922338	0.51115	0.980127	-0.0588678	0.960017	0.16621	0.88578	-0.099268	0.933507	0.537133	1	-0.0718301	0.95143	31.1319	31.1686	31.1174	31.0367	31.0293	31.1028	31.23	31.1625	31.1036	31.0958	31.209
O35295	Transcriptional activator protein Pur-beta	Purb	0.82305	0.985353	0.0116071	1.00808	0.884371	0.995018	0.00392656	1.00273	0.878091	0.991853	-0.00768051	0.99469	0.463752	0.88353	0.0796747	1.05678	0.00863581	1	0.0615915	1.04362	0.919282	0.996262	-0.00432587	0.997006	0.159998	0.980784	-0.0659173	0.955338	0.126477	0.848025	0.136737	1.09942	0.872496	1	-0.00885518	0.993881	31.2332	31.1895	31.2254	31.2281	31.2023	31.3766	31.1476	31.1586	31.1519	31.1934	31.2262
Q8BGT8	Phytanoyl-CoA hydroxylase-interacting protein-like	Phyhipl	0.13241	0.817258	0.128287	1.09299	0.906155	0.996722	0.00861692	1.00599	0.0123334	0.81796	-0.11967	0.920398	0.342482	0.895545	-0.0596304	0.95951	0.331444	1	0.130091	1.09436	0.793595	0.990137	-0.0296046	0.979689	0.038614	0.892603	-0.159696	0.895214	0.635665	0.984914	0.0368608	1.02588	0.138297	1	-0.0632048	0.957136	31.2577	31.3412	31.2789	30.9978	31.1391	31.0864	31.1086	31.1453	30.9737	31.1319	31.2129
Q80XN0	D-beta-hydroxybutyrate dehydrogenase, mitochondrial	Bdh1	0.0727735	0.805732	-0.139894	0.907586	0.527528	0.965221	-0.0750261	0.949325	0.572299	0.941973	0.0648678	1.04599	0.356242	0.844046	0.100496	1.07214	0.471335	1	-0.0602996	0.959065	0.915301	0.992211	-0.0191841	0.986791	0.83546	1	0.0411154	1.02891	0.329583	0.888548	0.12083	1.08736	0.802249	1	0.0614491	1.04351	31.21	31.3435	31.3347	31.3269	31.5639	31.4683	31.2623	31.5245	31.3991	31.4853	31.346
Q9CQZ5	NADH dehydrogenase [ubiquinone] 1 alpha subcomplex subunit 6	Ndufa6	0.020938	0.693587	-0.242899	0.845046	0.290836	0.901847	-0.153652	0.898972	0.524427	0.923092	0.0892471	1.06381	0.016311	0.546982	0.229522	1.17245	0.18223	1	-0.138874	0.908228	0.541032	0.911851	-0.143143	0.905544	0.985751	0.996487	-0.00426928	0.997045	0.12613	0.754938	0.212952	1.15906	0.943907	1	-0.0208394	0.985659	31.3084	31.3922	31.4454	31.3137	31.7596	31.7116	31.4122	31.6713	31.4845	31.5236	31.4886
P28740	Kinesin-like protein KIF2A	Kif2a	0.649986	0.939928	-0.0536426	0.963501	0.708019	0.983141	-0.0427478	0.970804	0.930561	0.991687	0.0108948	1.00758	0.0543234	0.66482	-0.191704	0.875571	0.646909	1	-0.0831432	0.943999	0.689329	0.970166	0.0628173	1.0445	0.48567	0.964591	0.14596	1.10647	0.549319	0.918329	-0.129307	0.914271	0.275749	1	0.208357	1.15537	31.4321	31.5347	31.6556	31.3727	31.5176	31.4321	31.8124	31.6793	31.3207	31.685	31.648
Q3UMR5	Calcium uniporter protein, mitochondrial	Mcu	0.148448	0.776825	0.206316	1.15374	0.412857	0.944942	0.101314	1.07275	0.403136	0.892707	-0.105002	0.929804	0.363525	0.771455	-0.164963	0.891952	0.331889	0.996854	0.21205	1.15833	0.432549	0.909676	0.147022	1.10728	0.759749	0.991631	-0.0650285	0.955926	0.782051	0.981942	-0.0631526	0.95717	0.853019	1	0.0367816	1.02582	30.9948	30.9146	31.1331	31.3085	30.7626	30.9244	30.7092	30.7989	31.212	30.8926	31.1244
Q05793	Basement membrane-specific heparan sulfate proteoglycan core protein	Hspg2	0.804228	0.952766	-0.0672674	0.954444	0.428575	0.904198	-0.21951	0.858857	0.366426	0.845209	-0.152243	0.89985	0.713965	0.94036	-0.0426912	0.970842	0.970119	0.998414	-0.0157299	0.989156	0.58843	0.909858	-0.241007	0.846154	0.429513	0.925661	-0.225278	0.85543	0.313879	0.793522	0.262489	1.19955	0.779507	1	0.079903	1.05695	31.5407	30.6101	31.73	31.6405	31.5335	31.6767	31.0256	31.5692	31.433	31.5764	31.7192
P48036	Annexin A5	Anxa5	0.612647	0.939989	-0.0588231	0.960047	0.154778	0.881501	0.189604	1.14045	0.0858764	0.703466	0.248427	1.18791	0.0168128	0.365651	0.35539	1.27933	0.892006	0.999717	-0.0227623	0.984346	0.328634	0.900379	0.154356	1.11292	0.435526	0.953045	0.177118	1.13062	0.814582	0.985559	-0.0511312	0.965179	0.283964	1	-0.229403	0.852988	31.269	31.5572	31.4444	31.4835	31.4956	31.4377	31.3067	31.8173	31.4294	31.0746	31.1479
Q9D0F9	Phosphoglucomutase-1	Pgm1	0.802211	0.987605	0.00594835	1.00413	0.662112	0.987785	-0.0303767	0.979165	0.553636	0.956616	-0.0363251	0.975136	0.812268	0.960305	0.0347033	1.02435	0.968695	1	0.00136058	1.00094	0.20736	0.918361	-0.0823167	0.94454	0.183927	0.973399	-0.0836773	0.943649	0.791884	1	-0.00959428	0.993372	0.336779	1	-0.127975	0.915115	31.1551	31.1011	31.1699	31.1854	31.1125	31.1698	31.1315	31.1903	31.1304	30.9813	31.2316
P14206	40S ribosomal protein SA	Rpsa	0.138438	0.809594	-0.142812	0.905752	0.345832	0.919723	-0.130463	0.913538	0.925741	0.991303	0.0123489	1.0086	0.732558	0.964388	0.0247087	1.01727	0.367582	1	-0.134167	0.911196	0.561695	0.919569	-0.130058	0.913795	0.986663	0.997242	0.00410906	1.00285	0.944439	1	-0.012085	0.991658	0.906581	1	-0.0326846	0.977599	31.2054	31.37	31.1823	31.2256	31.4373	31.3254	31.6252	31.3274	31.2277	31.3856	31.3277
Q99PJ0	Neurotrimin	Ntm	0.602739	0.950365	-0.036476	0.975034	0.355405	0.880828	-0.294763	0.815206	0.361563	0.797984	-0.258287	0.83608	0.685375	0.858816	-0.21193	0.863381	0.652731	1	-0.0433203	0.970419	0.446688	0.869501	-0.332513	0.794152	0.512739	0.928849	-0.289192	0.81836	0.506222	0.944988	-0.0869376	0.941519	0.80496	1	-0.1642	0.892424	31.058	31.2009	31.1843	31.124	31.1679	31.0843	31.3648	31.2077	31.0666	30.8879	31.7882
P31324	cAMP-dependent protein kinase type II-beta regulatory subunit	Prkar2b	0.305486	0.906617	0.0732312	1.05207	0.134616	0.884	-0.180132	0.882622	0.0316786	0.662692	-0.253363	0.838939	0.414348	0.940144	-0.0333586	0.977143	0.346772	1	0.0891043	1.06371	0.0614248	0.665133	-0.310928	0.806123	0.0339246	0.726635	-0.400033	0.757841	0.268938	0.887168	0.113737	1.08203	0.172434	1	-0.252937	0.839186	31.2198	31.1106	31.0054	31.1879	31.1367	31.1152	30.9295	31.14	30.9672	31.1285	31.1901
Q9Z2I0	Mitochondrial proton/calcium exchanger protein	Letm1	0.152059	0.893494	-0.0722467	0.951156	0.626649	0.980004	0.0483541	1.03408	0.171064	0.841485	0.120601	1.08719	0.987434	0.995889	-0.00150871	0.998955	0.369751	1	-0.0515181	0.96492	0.268151	0.899712	0.150489	1.10995	0.131949	0.893299	0.202007	1.1503	0.876078	1	-0.00878525	0.993929	0.265948	1	0.194731	1.14451	31.1295	31.3243	31.1657	31.1894	31.335	31.2033	31.2538	31.2827	31.2973	31.2171	31.3243
Q9WUR9	Adenylate kinase 4, mitochondrial	Ak4	0.725117	0.952795	0.0488158	1.03442	0.905072	0.992071	-0.0190526	0.986881	0.691684	0.950048	-0.0678684	0.954047	0.79495	0.964012	0.0300379	1.02104	0.217457	0.965705	0.20682	1.15414	0.759292	0.975013	0.0736809	1.0524	0.599033	0.976107	-0.133139	0.911845	0.0884605	0.678679	0.356249	1.28009	0.534409	1	0.193072	1.1432	31.3077	31.5123	31.3915	31.2055	31.5457	31.4927	31.3072	30.9475	31.2341	31.587	31.3913
E9PX29	Spectrin beta chain	Sptbn4	0.14344	0.835845	-0.109735	0.926758	0.0295953	0.870295	-0.180094	0.882645	0.298279	0.923505	-0.070359	0.952401	0.109136	0.718466	-0.163028	0.893149	0.0816722	0.972399	-0.162014	0.893776	0.171367	0.872522	-0.170594	0.888477	0.921465	0.997455	-0.00857989	0.994071	0.0370632	0.779193	-0.165475	0.891635	0.922664	1	-0.0110267	0.992386	31.0111	31.1866	31.055	30.9587	31.0163	31.1103	31.2748	31.2112	31.2003	31.2616	31.191
O35927	Catenin delta-2	Ctnnd2	0.0586781	0.714048	0.249634	1.18891	0.864488	0.992797	-0.0151263	0.98957	0.0457124	0.668145	-0.26476	0.832337	0.118852	0.541314	-0.326641	0.797391	0.369261	1	0.131041	1.09508	0.45992	0.932712	-0.0924657	0.937918	0.233013	0.892769	-0.223506	0.856481	0.31188	0.823603	-0.212052	0.863309	0.499471	1	-0.108917	0.927284	31.1917	31.1436	30.986	31.0403	30.8184	30.6087	30.6908	30.9915	31.0945	30.9741	31.1062
Q80YN3	Breast carcinoma-amplified sequence 1 homolog	Bcas1	0.543136	0.900653	-0.101839	0.931844	0.969844	0.995465	0.00928974	1.00646	0.629059	0.922071	0.111129	1.08007	0.435979	0.741271	0.261834	1.199	0.977374	0.996868	-0.00687663	0.995245	0.991912	0.997971	0.00378227	1.00263	0.978026	0.998029	0.0106589	1.00742	0.608714	0.93086	0.14259	1.10389	0.823252	1	-0.108585	0.927497	31.0646	30.9592	31.2249	31.4648	31.5103	31.2212	30.9569	31.553	31.1596	31.3332	30.8746
Q9JMH9	Unconventional myosin-XVIIIa	Myo18a	0.0372062	0.814228	-0.120261	0.920021	0.83115	0.993425	-0.0126293	0.991284	0.0779767	0.84507	0.107632	1.07746	0.142349	0.959735	0.022234	1.01553	0.21472	1	-0.107245	0.928359	0.421609	0.961407	0.057319	1.04053	0.0909513	0.905033	0.164564	1.12083	0.9762	1	-0.00242106	0.998323	0.103363	1	0.139909	1.10184	31.0909	31.0961	31.1096	31.2347	31.2531	31.2502	31.3011	31.3222	31.1389	31.2387	31.2201
Q9CQJ8	NADH dehydrogenase [ubiquinone] 1 beta subcomplex subunit 9	Ndufb9	0.159698	0.844955	-0.0964405	0.935338	0.68912	0.981305	-0.0449715	0.969309	0.627322	0.949895	0.051469	1.03632	0.829772	0.973961	0.0220556	1.01541	0.765342	0.998499	-0.0132459	0.990861	0.714697	0.976039	0.0578321	1.0409	0.655796	0.980717	0.071078	1.0505	0.187227	0.856593	0.132336	1.09607	0.403344	1	0.181359	1.13395	31.0335	31.1999	31.1034	31.1605	31.39	31.2103	31.163	31.1175	31.223	31.2868	31.2694
Q6PDM2	Serine/arginine-rich splicing factor 1	Srsf1	0.93471	0.987167	-0.0135986	0.990618	0.0477355	0.738887	0.298745	1.23007	0.0976885	0.663065	0.312344	1.24172	0.304224	0.639368	0.420339	1.33824	0.368588	1	0.0932306	1.06676	0.059397	0.624844	0.333578	1.26013	0.171598	0.900477	0.240348	1.18128	0.167008	0.673555	0.394217	1.31423	0.362495	1	0.214226	1.16008	31.6657	31.4834	31.5263	31.3772	31.5078	32.0188	31.5139	31.2349	31.3583	31.1731	31.5128
Q8BGH2	Sorting and assembly machinery component 50 homolog	Samm50	0.528211	0.925772	-0.0738967	0.950068	0.719762	0.977563	0.061662	1.04367	0.422027	0.875836	0.135559	1.09852	0.21873	0.62437	0.361489	1.28475	0.912885	0.997042	-0.0153154	0.98944	0.901498	0.993941	-0.0303771	0.979164	0.95271	0.997492	-0.0150617	0.989614	0.23354	0.791919	0.223519	1.16758	0.654525	1	-0.153032	0.899359	31.1377	30.8711	31.0169	31.155	31.3476	31.1588	31.0462	30.8439	31.1989	30.7106	31.0728
P62702;V9GWY0	40S ribosomal protein S4, X isoform;40S ribosomal protein S4	Rps4x;Gm15013	0.397736	0.933237	-0.0571095	0.961188	0.589253	0.957709	-0.094151	0.936823	0.796887	0.97096	-0.0370415	0.974652	0.897589	0.991385	0.00542068	1.00376	0.532089	1	-0.064874	0.956029	0.64357	0.93768	-0.130224	0.91369	0.803155	0.996332	-0.0653496	0.955714	0.247584	0.954639	-0.0570046	0.961258	0.712624	1	-0.127775	0.915242	31.2191	31.4246	31.3029	31.1103	31.3173	31.257	31.358	31.3796	31.2948	31.3036	31.2599
P15508	Spectrin beta chain, erythrocytic	Sptb	0.528653	0.936677	-0.0569994	0.961261	0.908698	0.993586	-0.0170153	0.988275	0.783588	0.967182	0.0399841	1.0281	0.408935	0.799415	-0.151426	0.90036	0.278114	1	-0.10348	0.930785	0.773714	0.980161	0.0641111	1.04544	0.487766	0.964746	0.167591	1.12318	0.192643	0.800539	-0.196967	0.872382	0.692282	1	0.12205	1.08828	30.7952	30.9657	30.9461	30.8615	30.7441	30.9178	31.0959	30.8761	31.1118	30.8649	31.0999
Q0VE82	Copine-7	Cpne7	0.224334	0.770293	0.258259	1.19603	0.0914609	0.896132	0.157399	1.11527	0.573305	0.921743	-0.10086	0.932477	0.649263	0.930413	-0.0495548	0.966234	0.221925	0.928618	0.40706	1.32598	0.0151389	0.626415	0.271996	1.20748	0.656015	0.982697	-0.135064	0.91063	0.551743	0.879123	0.240757	1.18161	0.156707	1	0.155248	1.11361	31.1247	31.3933	31.3729	31.2379	31.2203	31.1164	31.2594	30.3766	31.1468	31.1401	31.2957
Q9DAS9	Guanine nucleotide-binding protein G(I)/G(S)/G(O) subunit gamma-12	Gng12	0.123566	0.780364	-0.191736	0.875551	0.263702	0.939923	-0.0939658	0.936944	0.301002	0.889516	0.0977703	1.07012	0.143332	0.654888	0.239666	1.18072	0.528955	1	-0.0916964	0.938419	0.508061	0.938733	-0.0885232	0.940485	0.97868	0.997111	0.00317319	1.0022	0.191337	0.779589	0.224812	1.16863	0.908067	1	-0.0116806	0.991936	31.0182	30.8955	31.0391	31.2415	31.4712	31.2792	30.9753	31.2364	31.2395	31.1703	31.1008
Q9CQA3	Succinate dehydrogenase [ubiquinone] iron-sulfur subunit, mitochondrial	Sdhb	0.0692186	0.909284	0.0610909	1.04325	0.000139536	0.905672	0.0934425	1.06691	0.261545	0.956558	0.0323517	1.02268	0.140509	0.898767	0.0497913	1.03512	0.278541	1	0.0563571	1.03984	0.000528696	0.908854	0.0770823	1.05488	0.665593	1	0.0207253	1.01447	0.915624	1	-0.00670687	0.995362	0.06089	1	-0.035773	0.975509	31.2176	31.1989	31.2062	31.223	31.1325	31.1601	31.0952	31.2404	31.1236	31.0808	31.1123
Q68FH0	Plakophilin-4	Pkp4	0.112679	0.765651	0.220588	1.16521	0.481376	0.964382	0.0724793	1.05152	0.29363	0.842596	-0.148109	0.902433	0.241204	0.613829	-0.397358	0.759247	0.343981	1	0.0796827	1.05679	0.47819	0.928608	0.0977402	1.0701	0.898168	1	0.0180575	1.0126	0.172203	0.712711	-0.303692	0.810177	0.580041	1	0.111724	1.08052	31.3149	31.3044	31.2486	31.1585	31.0561	30.6515	31.189	31.0398	31.2438	31.1199	31.3824
Q8VHM5	Heterogeneous nuclear ribonucleoprotein R	Hnrnpr	0.713702	0.942769	-0.060337	0.95904	0.759681	0.993658	0.0240327	1.0168	0.578147	0.925975	0.0843697	1.06022	0.532736	0.802508	-0.205974	0.866953	0.0670197	0.951447	-0.222658	0.856985	0.653237	0.974437	0.0552737	1.03906	0.06563	0.864252	0.277932	1.21246	0.166094	0.677365	-0.397691	0.759072	0.530292	1	0.0862147	1.06158	31.314	31.4091	31.3132	31.1809	31.4	30.852	31.6287	31.5208	31.4216	31.3612	31.3027
P63028	Translationally-controlled tumor protein	Tpt1	0.587032	0.956043	-0.0290557	0.980062	0.0529847	0.904295	-0.109747	0.92675	0.215636	0.908135	-0.0806915	0.945604	0.462525	0.879432	-0.0839472	0.943473	0.282813	1	-0.0629234	0.957322	0.0843166	0.883356	-0.141445	0.906611	0.365021	0.980848	-0.0785211	0.947028	0.378829	0.929684	-0.0920862	0.938165	0.366913	1	-0.0866601	0.9417	30.9653	31.0085	30.9639	30.9593	30.862	31.0341	31.129	31.0284	30.963	31.0677	30.9963
P62754	40S ribosomal protein S6	Rps6	0.597619	0.951664	-0.0310006	0.978741	0.233366	0.904277	-0.154017	0.898745	0.28462	0.862929	-0.123016	0.918266	0.493616	0.909543	-0.0535879	0.963537	0.476061	1	-0.0473181	0.967734	0.295098	0.867459	-0.21662	0.860579	0.420399	0.950587	-0.169302	0.889273	0.593863	0.973034	0.0522788	1.0369	0.802497	1	-0.0634352	0.956983	31.2128	31.0916	31.0452	31.0548	31.2237	31.1033	30.9945	31.1778	31.1613	31.2404	31.1938
O08917	Flotillin-1	Flot1	0.960157	0.995266	0.00209885	1.00146	0.378983	0.966614	0.0630405	1.04467	0.356033	0.932942	0.0609417	1.04315	0.594319	0.884329	0.0989571	1.071	0.857266	1	-0.00920614	0.993639	0.658155	0.991495	0.026392	1.01846	0.612222	0.998781	0.0355981	1.02498	0.719799	0.992044	0.025973	1.01817	0.789817	1	-0.0373859	0.974419	31.3186	31.187	31.2694	31.239	31.2156	31.3183	31.2578	31.1621	31.303	31.019	31.3171
P62774	Myotrophin	Mtpn	0.197206	0.931915	-0.0529634	0.963954	0.153403	0.943992	-0.0739678	0.950022	0.590009	0.976462	-0.0210045	0.985546	0.10796	0.806285	-0.100518	0.932698	0.129834	1	-0.092509	0.93789	0.380795	0.957468	-0.0605043	0.958929	0.555291	0.998927	0.0320047	1.02243	0.1231	0.943431	-0.0639353	0.956651	0.354904	1	0.0685876	1.04869	31.0246	30.9397	30.9134	31.053	31.0028	30.9918	31.0579	31.0231	31.1027	31.0622	31.1334
Q8BGQ7	Alanine--tRNA ligase, cytoplasmic	Aars1	0.64968	0.967551	-0.0188531	0.987017	0.996397	0.999229	-0.000220966	0.999847	0.525897	0.977948	0.0186321	1.013	0.172448	0.852565	0.0782576	1.05574	0.797891	0.999479	-0.0164731	0.988647	0.581397	0.982006	-0.0375913	0.97428	0.303726	1	-0.0211182	0.985469	0.908615	1	0.00349458	1.00243	0.0253613	1	-0.0958811	0.935701	31.0785	30.9657	31.1662	31.1154	31.065	31.1399	31.0962	31.0982	31.1024	31.0215	31.0268
P62242	40S ribosomal protein S8	Rps8	0.320307	0.86908	-0.0974199	0.934703	0.702124	0.973443	-0.0645201	0.956263	0.837572	0.974891	0.0328999	1.02307	0.498436	0.915005	0.0494022	1.03484	0.483855	1	-0.108624	0.927472	0.753871	0.97002	-0.0867259	0.941657	0.941168	1	0.0218983	1.01529	0.800267	0.985701	-0.0459229	0.96867	0.834481	1	-0.0734269	0.950378	31.2504	31.3918	31.2835	31.1619	31.3998	31.2837	31.6238	31.3369	31.2023	31.2761	31.3086
O70161	Phosphatidylinositol 4-phosphate 5-kinase type-1 gamma	Pip5k1c	0.576971	0.957619	-0.0264732	0.981817	0.448776	0.973137	-0.0464581	0.968311	0.750621	0.978001	-0.0199848	0.986243	0.237808	0.848007	-0.0863819	0.941882	0.85724	0.996159	-0.0115865	0.992001	0.772938	0.993189	0.0126934	1.00884	0.726965	1	0.0242799	1.01697	0.449041	0.953209	0.066927	1.04748	0.0391565	1	0.177589	1.13099	31.1969	31.1887	31.153	31.1063	31.266	31.1898	31.2541	31.0621	31.1667	31.279	31.3495
Q99L47	Hsc70-interacting protein	St13	0.464574	0.941257	0.0446857	1.03146	0.0594253	0.895355	0.144843	1.10561	0.204347	0.87974	0.100158	1.07189	0.515576	0.872056	0.100609	1.07223	0.33687	1	0.0598176	1.04233	0.179066	0.88599	0.159674	1.11703	0.41335	0.97777	0.0998567	1.07167	0.957551	1	-0.00654157	0.995476	0.95808	1	-0.0072937	0.994957	31.0353	31.1407	31.0795	31.0987	30.9174	31.1625	31.0532	31.1327	30.9536	30.9007	30.9779
E9PUL5	Proline-rich transmembrane protein 2	Prrt2	0.678849	0.951196	-0.0340684	0.976662	0.937074	0.996506	-0.0105699	0.9927	0.827608	0.978523	0.0234985	1.01642	0.719736	0.970337	0.0212431	1.01483	0.481033	1	-0.0737432	0.95017	0.809068	0.989071	-0.048741	0.96678	0.899641	1	0.0250022	1.01748	0.641765	0.983309	0.0433353	1.03049	0.849826	1	0.0470943	1.03318	31.195	30.839	31.0837	30.9783	31.1104	31.0577	31.1263	31.0787	30.9171	31.107	31.0186
Q9D8E6	60S ribosomal protein L4	Rpl4	0.544546	0.93708	-0.0587943	0.960066	0.978185	0.99502	-0.00574789	0.996024	0.772699	0.956961	0.0530464	1.03745	0.789116	0.948992	0.0457649	1.03223	0.348524	1	-0.130576	0.913467	0.828424	0.982835	-0.0726751	0.950873	0.858761	1	0.0579007	1.04095	0.401584	0.904345	-0.110972	0.925964	0.817855	1	-0.0988366	0.933786	31.4684	31.5281	31.3721	31.1762	31.4732	31.2837	31.5985	31.5084	31.3612	31.4489	31.2164
P62908	40S ribosomal protein S3	Rps3	0.168466	0.820896	-0.134513	0.910977	0.606604	0.965312	-0.0867744	0.941626	0.760685	0.960545	0.0477383	1.03364	0.756086	0.956603	-0.0342417	0.976545	0.137925	0.967491	-0.18132	0.881896	0.768998	0.974906	-0.0789286	0.94676	0.709585	0.977719	0.102392	1.07355	0.182349	0.800851	-0.190712	0.876173	0.876416	1	-0.0540791	0.963209	31.1504	31.3672	31.2769	31.1607	31.3207	31.1971	31.5875	31.4426	31.3187	31.3669	31.2193
P62843	40S ribosomal protein S15	Rps15	0.121903	0.742976	0.257983	1.19581	0.31064	0.919423	0.111591	1.08042	0.26898	0.836604	-0.146392	0.903507	0.203568	0.758524	-0.140796	0.907019	0.190318	0.959624	0.262309	1.1994	0.00179285	0.893278	0.112186	1.08087	0.417967	0.960263	-0.150123	0.901174	0.363319	0.830212	0.233963	1.17606	0.00972284	1	0.224635	1.16848	31.5354	31.1741	31.1607	31.2003	31.0918	31.2083	30.5997	30.9866	31.1619	31.339	31.2426
Q99K48	Non-POU domain-containing octamer-binding protein	Nono	0.591721	0.948542	-0.0445112	0.969618	0.730941	0.995697	-0.0199392	0.986274	0.757494	0.976961	0.024572	1.01718	0.746412	0.931896	0.0566645	1.04006	0.869157	0.998776	-0.0163937	0.988701	0.881579	0.992346	-0.0132167	0.990881	0.977819	0.997596	0.00317701	1.0022	0.7954	0.986811	0.0426509	1.03	0.91863	1	-0.0108366	0.992517	31.1512	31.2686	31.1124	31.2053	31.1102	31.3988	31.0495	31.3079	31.2781	31.2481	31.1475
P31648	Sodium- and chloride-dependent GABA transporter 1	Slc6a1	0.257921	0.885215	0.0801013	1.05709	0.987166	0.999027	-0.00109758	0.99924	0.230512	0.907319	-0.0811989	0.945272	0.625926	0.887153	-0.10359	0.930714	0.236005	1	0.101395	1.07281	0.621496	0.988759	0.0351232	1.02464	0.165995	0.9812	-0.0662715	0.955103	0.913107	1	0.0122067	1.0085	0.658721	1	0.0495253	1.03492	31.0609	31.2374	31.1249	31.0172	31.161	30.9136	31.0952	30.9992	30.9809	31.008	31.2738
Q8BZ98	Dynamin-3	Dnm3	0.466213	0.939178	0.0512156	1.03614	0.507247	0.953558	-0.0902449	0.939363	0.293782	0.844416	-0.14146	0.906601	0.403535	0.909822	0.0500126	1.03527	0.275654	1	0.113057	1.08152	0.445869	0.908435	-0.156052	0.897478	0.255501	0.894031	-0.269109	0.829832	0.377981	0.893784	0.117422	1.08479	0.460121	1	-0.2017	0.869525	31.1076	31.203	31.1712	31.1269	31.1974	31.1455	30.9295	31.2211	31.0114	31.1613	31.0815
P62918	60S ribosomal protein L8	Rpl8	0.504139	0.944044	-0.0434787	0.970312	0.934385	0.994954	-0.0117564	0.991884	0.798254	0.975395	0.0317223	1.02223	0.334602	0.906836	0.0489693	1.03453	0.487403	1	-0.0676715	0.954177	0.836636	0.991309	-0.0474472	0.967647	0.927518	1	0.0202243	1.01412	0.320947	0.935724	-0.0833737	0.943848	0.697477	1	-0.112119	0.925228	31.1087	31.2728	31.019	31.1443	31.1678	31.0915	31.2144	31.2986	31.1261	31.0734	31.088
P68040	Receptor of activated protein C kinase 1	Rack1	0.706023	0.96326	-0.0231068	0.984111	0.797209	0.99111	-0.0277092	0.980977	0.965235	0.993224	-0.00460243	0.996815	0.44874	0.992281	0.00490761	1.00341	0.59329	1	-0.0506471	0.965503	0.722223	0.974886	-0.0615896	0.958208	0.954011	0.999234	-0.0109425	0.992444	0.504229	0.950457	-0.0799309	0.946103	0.671559	1	-0.095781	0.935766	31.1693	31.2055	31.1268	31.2287	31.1629	31.1525	31.3365	31.3009	31.0754	31.1521	31.1535
Q3ULJ0	Glycerol-3-phosphate dehydrogenase 1-like protein	Gpd1l	0.081512	0.888359	-0.0701227	0.952557	0.683174	0.98899	-0.0299017	0.979487	0.539784	0.954739	0.040221	1.02827	0.28623	0.895013	0.0570421	1.04033	0.488226	1	-0.0301208	0.979338	0.99223	0.998168	-0.00111389	0.999228	0.791439	1	0.029007	1.02031	0.0279321	0.887721	0.0850264	1.06071	0.699364	1	0.0569913	1.04029	30.8663	30.9609	30.8671	30.8428	31.0095	31.0014	30.9516	30.8967	30.9129	30.909	30.9877
P32037	Solute carrier family 2, facilitated glucose transporter member 3	Slc2a3	0.890859	0.985103	-0.0139399	0.990384	0.60899	0.983143	-0.0407637	0.97214	0.74514	0.97564	-0.0268238	0.981579	0.234542	0.733009	0.174486	1.12856	0.715158	1	0.0378571	1.02659	0.246583	0.904813	-0.123173	0.918166	0.0836085	0.901308	-0.16103	0.894386	0.0928512	0.738028	0.226986	1.17039	0.240024	1	-0.108531	0.927532	31.0547	31.0559	30.8411	30.7992	31.1691	31.0066	30.7766	30.8422	30.9638	30.8489	30.9778
P48453	Serine/threonine-protein phosphatase 2B catalytic subunit beta isoform	Ppp3cb	0.620187	0.963517	-0.021804	0.985	0.662574	0.979779	0.0485069	1.03419	0.495176	0.931351	0.070311	1.04994	0.572161	0.927684	-0.0472889	0.967753	0.455013	1	0.0312551	1.0219	0.120622	0.832732	0.179966	1.13286	0.17652	0.913843	0.148711	1.10858	0.0620666	0.851666	0.117257	1.08467	0.0825417	1	0.313257	1.24251	31.043	31.0878	31.1029	31.0123	31.1221	31.1852	31.0734	30.9878	31.048	31.2642	31.1377
Q8BH95	Enoyl-CoA hydratase, mitochondrial	Echs1	0.599208	0.956348	0.0277969	1.01945	0.0879621	0.880334	0.170336	1.12532	0.132735	0.825798	0.142539	1.10385	0.671098	0.919389	0.0583315	1.04126	0.852736	0.999554	0.0081164	1.00564	0.182733	0.826554	0.206793	1.15412	0.206893	0.902199	0.198677	1.14765	0.38923	0.932758	-0.0855586	0.94242	0.771023	1	0.054787	1.03871	31.1206	31.1672	31.1527	31.2164	30.9895	31.1807	31.0984	31.2104	31.2031	30.9568	31.0967
P14148	60S ribosomal protein L7	Rpl7	0.176951	0.825384	-0.120856	0.919642	0.497361	0.96698	-0.070623	0.952227	0.656461	0.952786	0.0502331	1.03543	0.245675	0.896116	-0.0559416	0.961966	0.192503	0.996682	-0.164309	0.892356	0.795688	0.992437	-0.0432924	0.970438	0.54849	0.978922	0.121016	1.0875	0.33333	0.863408	-0.15398	0.898768	0.915494	1	0.0229778	1.01605	31.0278	31.1332	31.0501	31.1177	31.1446	31.0767	31.317	31.4088	31.068	31.161	31.1722
Q62418	Drebrin-like protein	Dbnl	0.856168	0.987537	0.00841846	1.00585	0.659835	0.977493	0.0552702	1.03905	0.687601	0.957482	0.0468517	1.03301	0.879727	0.990335	0.00644779	1.00448	0.518029	1	0.04503	1.0317	0.550966	0.92561	0.118818	1.08584	0.721586	0.983462	0.0737877	1.05248	0.48355	0.956677	0.0652653	1.04628	0.614744	1	0.132605	1.09627	30.8832	30.9399	30.9058	30.9299	30.9607	30.9302	30.9318	30.7553	30.9536	30.9046	30.9734
P47911	60S ribosomal protein L6	Rpl6	0.386999	0.925063	-0.065422	0.955666	0.453983	0.941084	-0.111355	0.925718	0.721398	0.956273	-0.0459332	0.968663	0.817688	0.966551	-0.0270452	0.981428	0.1162	0.996258	-0.141859	0.90635	0.39831	0.900214	-0.200384	0.870319	0.787734	0.996006	-0.0585251	0.960245	0.271198	0.888041	-0.112316	0.925101	0.619304	1	-0.143796	0.905134	31.2011	31.2049	30.99	31.0303	31.2071	31.0022	31.2536	31.2309	31.1663	31.1436	31.1197
Q6P1F6	Serine/threonine-protein phosphatase 2A 55 kDa regulatory subunit B alpha isoform	Ppp2r2a	0.197074	0.843513	0.101552	1.07293	0.320147	0.922152	0.114186	1.08236	0.905353	0.990067	0.0126339	1.0088	0.725223	0.935849	0.0500641	1.03531	0.0910358	0.9585	0.174659	1.1287	0.351753	0.899051	0.16234	1.1191	0.938986	0.998173	-0.0123196	0.991497	0.145236	0.820482	0.163032	1.11964	0.648243	1	0.100649	1.07226	31.006	30.965	31.1558	30.9919	31.0931	30.9587	30.9308	30.8961	30.7618	30.8718	31.0799
Q8BGZ1	Hippocalcin-like protein 4	Hpcal4	0.783418	0.950996	-0.0533986	0.963664	0.933447	0.992631	0.0156112	1.01088	0.697566	0.94981	0.0690098	1.049	0.168053	0.688043	-0.223785	0.856316	0.573789	1	-0.170621	0.88846	0.724926	0.962483	0.0935853	1.06702	0.371539	0.91863	0.264207	1.20098	0.539703	0.887976	-0.188793	0.87734	0.259081	1	0.299199	1.23046	31.173	30.6398	31.1216	31.2572	30.9068	31.0692	31.5695	30.8689	31.0921	31.1444	31.2792
Q99KJ8	Dynactin subunit 2	Dctn2	0.259371	0.940018	-0.049184	0.966483	0.0464467	0.954329	-0.0609535	0.95863	0.779185	0.98678	-0.0117695	0.991875	0.276814	0.886468	0.0664597	1.04714	0.785291	0.999498	-0.0159334	0.989017	0.0144425	0.912195	-0.0798556	0.946152	0.313221	0.978941	-0.0639222	0.95666	0.353112	0.938325	0.0756372	1.05383	0.250268	1	-0.0547447	0.962765	30.9516	30.9465	30.9868	30.9574	31.0606	31.0497	30.9085	31.084	30.946	30.9441	31.0332
Q6IRU5	Clathrin light chain B	Cltb	0.0244425	0.843569	0.0845324	1.06034	0.887813	0.992903	0.0142763	1.00994	0.419201	0.924266	-0.070256	0.952469	0.262993	0.732975	-0.181506	0.881782	0.150404	1	0.0663516	1.04707	0.558078	0.960976	0.0702623	1.04991	0.971847	0.998137	0.0039107	1.00271	0.776745	1	0.00455793	1.00316	0.320217	1	0.189975	1.14074	31.145	31.0458	31.1357	31.0136	31.0176	30.9888	31.0075	30.9832	31.0053	31.0679	31.3015
A2CG49	Kalirin	Kalrn	0.745084	0.956517	0.0357718	1.02511	0.898445	0.991956	0.0281164	1.01968	0.970172	0.992524	-0.00765533	0.994708	0.0109931	0.337399	-0.465551	0.724194	0.40894	1	-0.0951875	0.936151	0.495256	0.900562	0.202421	1.15063	0.321784	0.898178	0.297609	1.22911	0.0339941	0.670517	-0.297873	0.813451	0.256235	1	0.465287	1.38059	31.1688	31.1028	31.2761	30.9859	30.9489	30.889	31.3327	31.1339	31.1838	31.3454	31.4235
Q91VW3	SH3 domain-binding glutamic acid-rich-like protein 3	Sh3bgrl3	0.679983	0.959568	-0.0274081	0.981181	0.852207	0.991866	0.0208863	1.01458	0.640182	0.952008	0.0482944	1.03404	0.239738	0.700381	0.249119	1.18848	0.71248	1	0.0327498	1.02296	0.653155	0.975037	-0.0528386	0.964038	0.485689	0.979693	-0.0855885	0.9424	0.33001	0.905952	0.101115	1.0726	0.241308	1	-0.233592	0.850514	30.8815	31.0682	30.8799	30.9328	31.0793	30.9781	30.8963	31.0451	30.8413	30.9213	30.6378
Q9JME5	AP-3 complex subunit beta-2	Ap3b2	0.66833	0.953477	-0.0444124	0.969685	0.248969	0.971937	0.0534151	1.03772	0.294629	0.889364	0.0978275	1.07016	0.181831	0.695622	0.222473	1.16673	0.755505	0.999595	0.0302347	1.02118	0.364832	0.970354	0.0449651	1.03166	0.877769	1	0.0147305	1.01026	0.149463	0.741618	0.25301	1.19169	0.471351	1	0.0452674	1.03187	31.1242	30.9603	31.0718	31.0219	31.1435	31.338	31.1176	31.0172	30.8285	30.9657	31.0709
Q99LY9	NADH dehydrogenase [ubiquinone] iron-sulfur protein 5	Ndufs5	0.179073	0.849173	0.0957646	1.06863	0.922937	0.995141	-0.0104674	0.992771	0.277943	0.879531	-0.106232	0.929011	0.369101	0.882976	-0.0745649	0.949628	0.234214	1	0.126807	1.09187	0.997601	0.998796	-0.000536601	0.999628	0.467544	0.969419	-0.127343	0.915516	0.439345	0.951574	0.0728607	1.0518	0.924103	1	0.0200822	1.01402	31.2542	31.1588	31.4068	31.2196	31.2724	31.1433	31.1265	31.0505	31.2279	31.2762	31.2886
Q9QY76	Vesicle-associated membrane protein-associated protein B	Vapb	0.453635	0.932793	-0.0611279	0.958514	0.485395	0.970493	-0.0564221	0.961646	0.899566	0.991853	0.00470581	1.00327	0.550641	0.913535	0.0527611	1.03725	0.326989	1	-0.101084	0.932332	0.184857	0.898967	-0.128415	0.914836	0.561049	1	-0.027331	0.981234	0.475487	0.974299	0.0452156	1.03184	0.573902	1	-0.0348765	0.976115	31.1419	30.7585	30.9402	31.0304	31.0451	31.0669	30.9916	31.0923	30.9485	30.9299	31.0766
Q00PI9	Heterogeneous nuclear ribonucleoprotein U-like protein 2	Hnrnpul2	0.959708	0.986736	0.00886698	1.00617	0.414082	0.968999	0.0501031	1.03534	0.787837	0.967571	0.0412361	1.029	0.343299	0.721549	-0.267162	0.830952	0.0464498	0.940725	-0.204216	0.86801	0.603353	0.980123	0.0426191	1.02998	0.00159584	0.804831	0.246835	1.1866	0.0368243	0.754303	-0.530963	0.692093	0.842179	1	-0.0169652	0.988309	31.1168	31.2402	31.1037	30.9982	30.9835	30.591	31.3474	31.3112	31.2961	31.1469	30.962
H3BJD6	Protein phosphatase 1, regulatory subunit 9A	Ppp1r9a	0.0991451	0.686492	0.328155	1.25541	0.754339	0.987581	0.0384684	1.02702	0.123304	0.695332	-0.289687	0.81808	0.059226	0.350796	-0.588384	0.665088	0.617586	1	0.0700302	1.04974	0.90166	0.992	-0.0205256	0.985873	0.630846	0.979032	-0.0905558	0.939161	0.0313222	0.727398	-0.530122	0.692496	0.887409	1	-0.0322946	0.977864	31.065	30.921	30.7385	30.9825	30.2672	30.2938	30.7942	30.6343	31.0034	30.7196	31.0182
Q9CZC8	Secernin-1	Scrn1	0.0991713	0.837348	-0.105472	0.929501	0.21997	0.903019	-0.140213	0.907385	0.723507	0.967592	-0.0347416	0.976207	0.479292	0.851623	0.109426	1.0788	0.411854	1	-0.0638186	0.956728	0.162933	0.831591	-0.194672	0.873771	0.351592	0.965342	-0.130854	0.913291	0.772855	0.991733	0.0281442	1.0197	0.285121	1	-0.212136	0.863258	30.6805	30.8518	30.8196	30.7349	30.952	30.8361	30.8155	30.9862	30.7961	30.6718	30.8975
P60904	DnaJ homolog subfamily C member 5	Dnajc5	0.0335437	0.67891	0.26869	1.20471	0.363147	0.918895	0.132077	1.09587	0.322217	0.850996	-0.136613	0.909652	0.3477	0.744219	-0.198505	0.871453	0.228053	0.960612	0.222088	1.16642	0.556893	0.921514	0.126736	1.09182	0.675864	0.977243	-0.0953522	0.936044	0.561194	0.935944	-0.104115	0.930376	0.997206	0.999961	-0.000961622	0.999334	31.2854	31.3246	31.3958	31.0765	30.9093	30.9695	31.1652	31.1669	30.7984	30.9776	31.2982
Q6ZPE2	Myotubularin-related protein 5	Sbf1	0.190008	0.890725	-0.0747737	0.949491	0.966944	0.995261	-0.004177	0.997109	0.426726	0.924474	0.0705967	1.05015	0.62922	0.8856	-0.0995178	0.933345	0.220283	1	-0.0920404	0.938195	0.318875	0.918037	0.091966	1.06582	0.0465882	0.89853	0.184006	1.13603	0.168458	0.904485	-0.0888147	0.940295	0.278997	1	0.194709	1.14449	30.9929	31.1227	31.1221	30.953	31.0261	31.1122	31.1793	31.1937	31.1009	31.3396	30.9977
Q61990	Poly(rC)-binding protein 2	Pcbp2	0.762507	0.973726	0.017616	1.01229	0.00213131	0.897786	0.109536	1.07888	0.0949501	0.878083	0.0919197	1.06579	0.16532	0.795654	0.115698	1.0835	0.749728	0.996639	0.0283546	1.01985	0.0407668	0.900635	0.104422	1.07506	0.400624	0.97887	0.0760676	1.05414	0.730789	0.985926	0.040727	1.02863	0.973365	1	0.00109673	1.00076	31.1397	31.1099	31.0734	31.1691	31.0787	31.181	31.0712	31.2325	30.9636	31.0314	30.9969
P18242	Cathepsin D	Ctsd	0.0905573	0.822364	-0.113434	0.924385	0.000804075	0.490916	0.381977	1.30313	1.28687e-05	0.304	0.495411	1.40972	0.0158161	0.357806	0.444621	1.36096	0.281399	1	-0.0784327	0.947086	0.00530526	0.533259	0.450838	1.36683	0.00340424	0.676571	0.529271	1.4432	0.738976	0.988711	-0.0248938	0.982893	0.577715	1	0.059756	1.04229	31.3454	31.4829	31.4846	31.6081	31.6184	31.539	31.6044	31.6855	31.5209	31.1744	31.0938
O70443	Guanine nucleotide-binding protein G(z) subunit alpha	Gnaz	0.811525	0.958333	-0.0335787	0.976994	0.437475	0.922864	-0.134727	0.910842	0.574095	0.92216	-0.101148	0.932291	0.442613	0.7231	-0.322411	0.799732	0.326966	1	-0.156477	0.897213	0.558732	0.932919	-0.110117	0.926513	0.813982	0.998949	0.04636	1.03266	0.0804366	0.669111	-0.366503	0.77566	0.994753	1	0.00226752	1.00157	31.0048	31.2219	31.1481	30.9287	30.8971	30.882	31.4706	31.1835	31.1141	30.8725	31.5515
P46638;P62492	Ras-related protein Rab-11B;Ras-related protein Rab-11A	Rab11b;Rab11a	0.721453	0.987606	0.00680952	1.00473	0.0698537	0.972597	-0.049801	0.96607	0.0106847	0.92501	-0.0566105	0.96152	0.180175	0.882722	-0.065711	0.955474	0.378499	0.995684	0.0221551	1.01548	0.381737	0.990271	-0.0283883	0.980515	0.0683486	0.976279	-0.0505435	0.965573	0.482822	0.991378	0.0138899	1.00967	0.420935	1	0.0290575	1.02035	30.9655	31.0314	31.0205	30.9622	30.9759	31.017	30.9818	30.994	30.9719	31.037	31.0873
P26040	Ezrin	Ezr	0.286714	0.820762	-0.153742	0.898916	0.950245	0.996499	0.00959616	1.00667	0.253334	0.826458	0.163338	1.11988	0.887205	0.965148	0.0498323	1.03514	0.509195	1	-0.137523	0.909079	0.53201	0.933173	0.101486	1.07288	0.189498	0.888842	0.239009	1.18018	0.709377	0.963571	-0.0795333	0.946364	0.66945	1	0.109644	1.07896	30.9217	31.1	30.8912	31.3504	31.283	31.0607	30.9918	31.4509	31.3115	31.4119	30.8322
P70704	Phospholipid-transporting ATPase IA	Atp8a1	0.815252	0.975157	0.0185355	1.01293	0.216486	0.91401	0.12031	1.08697	0.333988	0.888943	0.101775	1.07309	0.729423	0.936639	-0.0498133	0.966061	0.958836	0.997033	0.00653521	1.00454	0.0699869	0.795021	0.209368	1.15618	0.215525	0.905797	0.202833	1.15096	0.732402	0.981139	-0.0554857	0.96227	0.244064	1	0.197161	1.14644	31.0061	31.0325	31.1126	30.9956	30.9638	31.0059	31.2578	30.8731	30.9902	30.9111	31.1582
Q8CBW3	Abl interactor 1	Abi1	0.812538	0.984379	-0.0126631	0.991261	0.500477	0.957098	0.0816988	1.05826	0.361907	0.903426	0.0943619	1.06759	0.252628	0.88302	-0.0667458	0.954789	0.621556	1	-0.0406666	0.972206	0.317181	0.898172	0.1611	1.11814	0.209525	0.907557	0.201767	1.15011	0.818841	0.996371	-0.0148109	0.989786	0.225906	1	0.253702	1.19226	31.051	30.9002	31.0847	30.903	30.9777	30.9993	31.0843	30.9269	30.9987	31.0147	31.0958
Q8BSS9	Liprin-alpha-2	Ppfia2	0.282029	0.822906	0.151783	1.11094	0.403519	0.919277	0.148853	1.10869	0.986262	0.996079	-0.00292969	0.997971	0.133474	0.603966	-0.296955	0.813969	0.671111	1	0.0895036	1.064	0.250918	0.814622	0.282591	1.21638	0.46382	0.953813	0.193087	1.14321	0.571504	0.919668	-0.135156	0.910572	0.235434	1	0.354887	1.27889	31.3524	31.5265	31.2964	31.1357	31.1704	31.0193	31.5296	30.9856	31.1749	31.2973	31.4863
P25444	40S ribosomal protein S2	Rps2	0.132246	0.824204	-0.124349	0.917418	0.612444	0.970134	-0.0673454	0.954392	0.63809	0.949966	0.0570038	1.0403	0.879024	0.986325	0.0125008	1.0087	0.130461	0.973464	-0.180355	0.882486	0.664987	0.956801	-0.0936826	0.937128	0.683374	0.981462	0.0866725	1.06192	0.224078	0.855934	-0.137551	0.909061	0.812261	1	-0.0633793	0.95702	31.1177	31.2568	31.0297	31.055	31.2115	31.1017	31.3686	31.3431	31.1707	31.1915	31.0967
Q63912	Oligodendrocyte-myelin glycoprotein	Omg	0.814469	0.951744	-0.0513969	0.965001	0.584391	0.941456	-0.155047	0.898103	0.723916	0.9386	-0.10365	0.930675	0.578116	0.788675	-0.311007	0.806079	0.241122	0.957448	-0.230054	0.852603	0.550224	0.906807	-0.195466	0.873291	0.918263	1	0.0345885	1.02426	0.0398816	0.687855	-0.622335	0.649618	0.624573	1	-0.276739	0.825454	30.6701	31.0992	30.9783	30.7761	30.5535	30.5643	31.3926	31.23	30.9212	30.3973	31.3425
P35762	CD81 antigen	Cd81	0.217334	0.835267	0.119846	1.08662	0.654368	0.96967	0.0699022	1.04965	0.733175	0.956415	-0.0499435	0.965974	0.345965	0.893015	-0.0625248	0.957587	0.584658	1	0.0792503	1.05647	0.882217	0.989011	0.0376943	1.02647	0.876957	1	-0.041556	0.971606	0.595236	0.956019	-0.0871429	0.941385	0.835552	1	-0.0661742	0.955168	31.2628	31.3295	31.3001	31.0898	31.0226	31.1242	31.0672	31.3799	31.0346	31.1417	31.1302
Q91WC3	Long-chain-fatty-acid--CoA ligase 6	Acsl6	0.142473	0.876526	-0.0795568	0.946348	0.306506	0.882693	-0.253686	0.838751	0.419863	0.841089	-0.174129	0.886302	0.698873	0.975048	0.0161266	1.01124	0.419186	1	-0.0652682	0.955768	0.345129	0.825763	-0.366234	0.775805	0.433609	0.911177	-0.300966	0.811709	0.961415	1	0.00445557	1.00309	0.528216	1	-0.312637	0.805169	30.896	31.0112	30.9441	30.8827	31.0517	30.9798	30.9452	31.1359	30.9527	30.9962	31.003
Q925N0	Sideroflexin-5	Sfxn5	0.925727	0.987156	-0.00731678	0.994941	0.564823	0.954985	-0.0989531	0.93371	0.546449	0.922276	-0.0916363	0.938458	0.0145607	0.643286	0.190986	1.14154	0.859609	0.998573	0.0222346	1.01553	0.247816	0.829953	-0.257816	0.836353	0.216575	0.899254	-0.280051	0.823562	0.596272	0.962841	0.0643457	1.04561	0.164314	1	-0.406691	0.754352	30.8816	30.7573	30.8888	31.0445	30.9566	30.9213	30.7654	31.0392	30.8192	30.7328	30.7632
P17156	Heat shock-related 70 kDa protein 2	Hspa2	0.297096	0.940434	0.0438885	1.03089	0.161624	0.895762	0.143534	1.10461	0.254414	0.885796	0.0996456	1.07151	0.0608813	0.810535	-0.0935192	0.937234	0.272332	1	0.0540918	1.03821	0.0152184	0.61761	0.282514	1.21631	0.0411953	0.88053	0.228422	1.17155	0.463305	0.975273	-0.0439781	0.969977	0.0484986	1	0.277963	1.21248	31.0249	31.1727	31.1103	31.1253	31.0139	31.0622	31.1019	31.0083	31.1358	31.1306	31.1325
Q9WV34	MAGUK p55 subfamily member 2	Mpp2	0.339861	0.919559	-0.0663037	0.955082	0.163829	0.921234	-0.0947484	0.936436	0.569392	0.967653	-0.0284447	0.980477	0.109923	0.828474	0.0901165	1.06446	0.953996	0.996801	0.00503476	1.0035	0.220531	0.907801	-0.102451	0.931449	0.138858	0.9561	-0.107485	0.928204	0.251845	0.905347	0.0944376	1.06765	0.0932135	1	-0.103164	0.930989	30.7721	31.0314	30.8711	30.8165	31.0134	30.9781	30.8005	30.9608	30.9427	30.9331	30.8782
Q8BL65	Actin-binding LIM protein 2	Ablim2	0.868375	0.972872	-0.0237936	0.983643	0.654269	0.972848	-0.0811331	0.945315	0.733845	0.954877	-0.0573395	0.961035	0.55709	0.820088	-0.190303	0.876422	0.470075	1	-0.147658	0.902715	0.641136	0.941698	-0.116355	0.922515	0.89564	1	0.0313028	1.02193	0.222147	0.758779	-0.256982	0.836836	0.916693	1	-0.0353769	0.975777	30.7448	30.7598	30.3897	30.8321	30.49	30.6124	31.0446	30.6212	30.7587	30.476	31.0069
Q9CQ75	NADH dehydrogenase [ubiquinone] 1 alpha subcomplex subunit 2	Ndufa2	0.165937	0.893846	-0.0724907	0.950995	0.47145	0.977771	-0.0446865	0.9695	0.664876	0.972818	0.0278042	1.01946	0.18051	0.793442	0.116652	1.08422	0.323216	1	-0.063036	0.957248	0.317098	0.914247	-0.0944633	0.936621	0.762475	1	-0.0314274	0.978452	0.44556	0.953222	0.069561	1.0494	0.513055	1	-0.0785179	0.94703	30.9352	30.8359	30.857	30.8923	31.0469	30.9418	30.9907	30.8188	30.9649	30.9015	30.8539
P26638	Serine--tRNA ligase, cytoplasmic	Sars1	0.0173089	0.836955	-0.0920138	0.938212	0.133434	0.941648	-0.0812892	0.945213	0.829146	0.990469	0.0107246	1.00746	0.370061	0.874667	0.0812225	1.05791	0.120416	1	-0.0750491	0.94931	0.106799	0.903126	-0.111323	0.925739	0.601388	0.998367	-0.036274	0.97517	0.731423	0.990621	0.0213846	1.01493	0.315781	1	-0.0961119	0.935551	30.8486	30.8993	30.8854	30.8622	30.9364	31.021	30.9954	30.9924	30.8842	30.8407	30.9543
Q9CPU0	Lactoylglutathione lyase	Glo1	0.58028	0.940153	-0.048684	0.966818	0.863456	0.992294	0.0174365	1.01216	0.260488	0.925292	0.0661205	1.0469	0.971818	0.992413	0.00418854	1.00291	0.991759	1	-0.00121244	0.99916	0.446026	0.918227	0.106196	1.07639	0.173259	0.964545	0.107409	1.07729	0.972116	1	-0.00203673	0.998589	0.391632	1	0.101183	1.07265	30.7745	31.1745	30.9239	30.8044	30.901	31.0326	30.9472	31.002	30.9573	31.0445	30.8807
Q8R3V5	Endophilin-B2	Sh3glb2	0.330997	0.939458	-0.0455089	0.968948	0.210809	0.947569	-0.0814105	0.945133	0.507675	0.956026	-0.0359016	0.975422	0.424426	0.91463	-0.0475407	0.967584	0.70784	0.994236	-0.024704	0.983022	0.591924	0.970629	-0.0528463	0.964033	0.753916	1	-0.0281423	0.980682	0.512952	0.977613	0.0430425	1.03028	0.569092	1	0.0624409	1.04423	30.7502	30.8635	30.7268	30.7032	30.7845	30.88	30.7524	30.8605	30.7548	30.88	30.8796
P62082	40S ribosomal protein S7	Rps7	0.853955	0.98089	0.0152653	1.01064	0.387881	0.933424	-0.114671	0.923593	0.275531	0.84775	-0.129936	0.913872	0.309809	0.748447	-0.180839	0.88219	0.880754	0.99702	-0.0149015	0.989724	0.596095	0.938298	-0.110902	0.926009	0.618401	0.977615	-0.0960007	0.935623	0.290369	0.883157	-0.124077	0.917591	0.876019	1	-0.0392386	0.973168	30.8854	31.123	30.9297	30.8371	30.9641	30.7441	31.0396	30.9918	30.9031	31.1115	30.9583
Q9DC70	NADH dehydrogenase [ubiquinone] iron-sulfur protein 7, mitochondrial	Ndufs7	0.0736335	0.776006	0.193612	1.14362	0.857478	0.994031	-0.0184474	0.987295	0.0235697	0.702945	-0.21206	0.863304	0.134423	0.706225	-0.188834	0.877314	0.136022	0.941364	0.250897	1.18995	0.876498	0.994168	0.0233536	1.01632	0.155745	0.891126	-0.227544	0.854088	0.758836	0.986139	0.037921	1.02663	0.995785	1	-0.000788371	0.999454	30.9079	30.8739	31.2062	31.1491	30.8683	30.8585	30.6946	30.7908	30.991	30.9751	31.1293
Q07076	Annexin A7	Anxa7	0.65566	0.970746	-0.0173929	0.988017	0.241329	0.946866	0.0754591	1.0537	0.128262	0.878681	0.092852	1.06648	0.132567	0.721448	0.163217	1.11978	0.875607	0.998887	0.00774447	1.00538	0.570039	0.971584	0.0536868	1.03791	0.614487	0.992959	0.0459423	1.03236	0.229427	0.937888	0.0702957	1.04993	0.69789	1	-0.0469786	0.967961	30.8709	30.931	30.8193	30.8265	30.9585	30.8845	30.8849	30.793	30.8756	30.8131	30.7034
P31650	Sodium- and chloride-dependent GABA transporter 3	Slc6a11	0.164999	0.819132	0.135518	1.09849	0.61703	0.942331	-0.185792	0.879166	0.34637	0.780685	-0.32131	0.800343	0.6523	0.935255	0.0421085	1.02962	0.548226	1	0.0831064	1.0593	0.369886	0.802164	-0.480483	0.716738	0.314331	0.878509	-0.563589	0.676617	0.589951	0.948248	-0.0992091	0.933545	0.334124	1	-0.704907	0.613482	31.0389	31.0564	30.9455	30.9621	30.8709	30.7405	30.8324	31.1431	30.7392	30.7168	30.8104
Q61411	GTPase HRas	Hras	0.892305	0.987384	-0.0053854	0.996274	0.0639926	0.896154	-0.127183	0.915617	0.0264347	0.828584	-0.121798	0.919042	0.47598	0.844895	-0.115711	0.922927	0.99485	0.999772	0.000377019	1.00026	0.102904	0.898935	-0.125479	0.9167	0.0112198	0.911428	-0.125856	0.91646	0.860819	1	0.007418	1.00516	0.979596	1	-0.00272655	0.998112	30.7334	30.7202	30.8474	30.6663	30.7999	30.7035	30.7506	30.7219	30.7602	30.9913	30.7434
P20108	Thioredoxin-dependent peroxide reductase, mitochondrial	Prdx3	0.0698569	0.825511	0.111613	1.08044	0.503471	0.977449	0.044489	1.03132	0.334285	0.92663	-0.0671238	0.954539	0.633711	0.908448	-0.0665302	0.954932	0.155961	1	0.0811749	1.05788	0.697006	0.991828	0.0136553	1.00951	0.225406	0.977634	-0.0675195	0.954277	0.0969767	0.844894	-0.134079	0.911252	0.238837	1	-0.135068	0.910627	30.8102	30.8878	30.9471	30.8739	30.6614	30.714	30.8667	30.8582	30.7404	30.6376	30.8708
P61255	60S ribosomal protein L26	Rpl26	0.0683834	0.813892	-0.126157	0.916269	0.228996	0.885832	-0.229828	0.852737	0.53684	0.912029	-0.103671	0.930662	0.866687	0.972562	-0.0260658	0.982095	0.140631	0.989857	-0.162189	0.893668	0.280163	0.810474	-0.317596	0.802406	0.591759	0.973404	-0.155408	0.897879	0.588965	0.962049	-0.0660308	0.955263	0.608242	1	-0.195373	0.873347	30.881	30.7955	30.8839	30.848	30.9297	30.9476	30.8464	31.1358	31.0318	31.1014	30.828
Q00493	Carboxypeptidase E	Cpe	0.650232	0.952305	0.0415949	1.02925	0.100894	0.898722	0.135373	1.09838	0.354679	0.903484	0.0937786	1.06716	0.365198	0.759684	0.186057	1.13765	0.317229	1	0.120115	1.08682	0.0923652	0.871639	0.152375	1.1114	0.790838	1	0.0322596	1.02261	0.214054	0.799677	0.204535	1.15232	0.736506	1	0.0507377	1.03579	31.0643	30.9786	31.0671	31.1077	31.1761	31.095	31.0614	30.739	30.9927	30.7946	31.1044
Q3UHB8	Coiled-coil domain-containing protein 177	Ccdc177	0.326588	0.881883	0.0856364	1.06116	0.108218	0.880989	-0.170604	0.888471	0.0264751	0.656364	-0.25624	0.837267	0.0758202	0.430247	-0.369564	0.774016	0.519432	1	-0.0444304	0.969673	0.132988	0.804533	-0.225122	0.855523	0.232632	0.911833	-0.180691	0.88228	0.0588612	0.732287	-0.213981	0.862155	0.891873	1	-0.0251083	0.982747	30.6865	30.4925	30.5659	30.4675	30.3449	30.3333	30.4771	30.5207	30.6614	30.6008	30.8165
P84089	Enhancer of rudimentary homolog	Erh	0.111845	0.71609	0.273841	1.20902	0.448038	0.947841	0.0903012	1.06459	0.221808	0.804167	-0.18354	0.88054	0.334922	0.677586	-0.373459	0.77193	0.319072	1	0.112123	1.08082	0.730691	0.980028	0.0551955	1.039	0.720998	0.992246	-0.0569274	0.961309	0.387527	0.830769	-0.238721	0.847496	0.681632	1	0.0778106	1.05542	31.2382	30.9108	30.8945	31.1145	30.9169	30.328	30.7242	30.9205	30.9387	30.9612	31.0306
Q8R001	Microtubule-associated protein RP/EB family member 2	Mapre2	0.329049	0.917004	-0.068624	0.953547	0.132364	0.821725	-0.31663	0.802943	0.181947	0.759957	-0.248006	0.842059	0.957117	0.992794	-0.00792217	0.994524	0.840113	0.995184	-0.0127182	0.991223	0.196209	0.7123	-0.420781	0.74702	0.204215	0.867763	-0.408063	0.753635	0.244582	0.86199	0.133605	1.09703	0.500483	1	-0.266535	0.831314	30.6607	30.7648	30.6449	30.602	30.9267	30.707	30.6561	30.6439	30.7498	30.8953	30.7543
Q8CGY8	UDP-N-acetylglucosamine--peptide N-acetylglucosaminyltransferase 110 kDa subunit	Ogt	0.508224	0.949605	-0.03283	0.977501	0.547904	0.969387	0.0560543	1.03962	0.281298	0.899614	0.0888844	1.06355	0.658075	0.975433	0.0144291	1.01005	0.579721	0.997829	0.0301139	1.02109	0.165887	0.868584	0.168635	1.12399	0.228665	0.936894	0.138521	1.10078	0.153585	0.912186	0.0829557	1.05919	0.182852	1	0.207048	1.15432	30.8863	31.067	31.0138	30.9354	31.0755	31.041	31.0394	30.95	30.9364	31.0217	31.0659
P70414	Sodium/calcium exchanger 1	Slc8a1	0.588464	0.939627	0.0567572	1.04013	0.792118	0.992571	-0.030002	0.979419	0.243046	0.89839	-0.0867592	0.941636	0.130784	0.671395	-0.222406	0.857135	0.934589	0.998741	-0.0125764	0.991321	0.9507	0.995603	-0.00890414	0.993847	0.966301	0.998653	0.00367228	1.00255	0.578247	0.966373	-0.0551316	0.962507	0.146592	1	0.170947	1.1258	31.067	30.6324	31.0587	30.9426	30.8584	30.8123	31.0252	30.8188	30.8274	30.9713	31.1442
O55023	Inositol monophosphatase 1	Impa1	0.551317	0.951808	0.0326568	1.02289	0.605345	0.984448	-0.0329789	0.9774	0.309631	0.925722	-0.0656357	0.955524	0.606686	0.900989	-0.0680838	0.953904	0.776181	0.999492	0.0142994	1.00996	0.627855	0.974417	-0.0497042	0.966134	0.48047	0.976289	-0.0640036	0.956606	0.544776	0.96359	-0.0567602	0.961421	0.65548	1	-0.05268	0.964144	30.8571	30.8809	30.9525	30.7901	30.6916	30.9153	30.8583	30.861	30.8613	30.8589	30.8842
Q9D1K2	V-type proton ATPase subunit F	Atp6v1f	0.209506	0.845833	0.0996326	1.0715	0.305764	0.933662	0.103929	1.0747	0.962315	0.993095	0.00429649	1.00298	0.630767	0.88596	0.104927	1.07544	0.303892	1	0.129269	1.09374	0.500293	0.959533	0.0664787	1.04716	0.573546	0.979785	-0.0627906	0.95741	0.777865	0.991257	0.0355409	1.02494	0.453198	1	-0.132177	0.912454	30.7884	30.9381	30.8985	30.7136	30.8028	30.7099	30.8403	30.5561	30.766	30.4705	30.8323
B9EKR1	Receptor-type tyrosine-protein phosphatase zeta	Ptprz1	0.106685	0.894272	0.0698501	1.04961	0.175393	0.952375	0.0700633	1.04976	0.996514	0.999665	0.000213242	1.00015	0.578784	0.934856	-0.0410395	0.971954	0.156488	1	0.0958614	1.0687	0.0221701	0.88802	0.123576	1.08943	0.602194	1	0.027715	1.0194	0.416706	0.958901	0.0561978	1.03972	0.0916861	1	0.124952	1.09047	30.9957	30.9997	31.0659	30.964	30.9651	30.9753	30.8882	31.0038	30.85	30.9489	31.0735
Q921M7	CYFIP-related Rac1 interactor B	Cyrib	0.604968	0.953085	-0.0405061	0.972314	0.991086	0.99887	-0.0011342	0.999214	0.617474	0.957013	0.0393719	1.02767	0.531821	0.929382	-0.0439034	0.970027	0.468278	1	-0.0858301	0.942242	0.950006	0.996494	0.00905863	1.0063	0.483608	0.97629	0.0948887	1.06798	0.820041	0.989928	-0.0209986	0.98555	0.465759	1	0.117793	1.08507	30.8873	30.6471	30.9114	30.6603	30.7802	30.8287	30.8101	30.9432	30.723	30.795	30.9017
P02468	Laminin subunit gamma-1	Lamc1	0.496608	0.836876	-0.171949	0.887643	0.438307	0.901603	-0.205637	0.867156	0.840815	0.975521	-0.0336872	0.97692	0.750107	0.915783	0.0803585	1.05728	0.67544	1	-0.148251	0.902344	0.522157	0.899699	-0.257969	0.836264	0.659503	0.978408	-0.109718	0.926769	0.220906	0.750338	0.287149	1.22023	0.755694	1	0.0970729	1.0696	31.2416	30.2743	31.2929	31.0637	31.1585	31.4662	30.8627	31.2443	30.9686	31.0745	31.3895
P47962	60S ribosomal protein L5	Rpl5	0.511259	0.931845	0.0647511	1.0459	0.81525	0.987696	0.0422726	1.02973	0.893202	0.984054	-0.0224785	0.98454	0.661487	0.904455	-0.0743971	0.949739	0.970034	0.999265	0.0037969	1.00264	0.9562	0.996964	0.0159308	1.0111	0.965797	0.997271	0.0121339	1.00845	0.198109	0.803663	-0.193983	0.874189	0.772964	1	-0.107452	0.928226	31.1595	31.381	31.1788	31.1185	31.1579	30.8987	31.3157	31.216	31.1352	31.1705	31.035
Q8K4G5	Actin-binding LIM protein 1	Ablim1	0.280999	0.836501	0.128287	1.093	0.847476	0.992627	0.0217549	1.01519	0.415752	0.891866	-0.106532	0.928818	0.144637	0.543409	-0.355437	0.781633	0.449048	1	-0.0510019	0.965266	0.95413	0.995099	0.00840251	1.00584	0.693171	0.990369	0.0594044	1.04204	0.0178137	0.654802	-0.338102	0.791081	0.728215	1	0.0767393	1.05463	31.0482	30.9176	30.9028	30.7958	30.5352	30.6347	30.9896	30.8318	30.9478	30.7965	31.0842
Q9CX86	Heterogeneous nuclear ribonucleoprotein A0	Hnrnpa0	0.127261	0.723022	0.276339	1.21112	0.574549	0.971426	-0.0540282	0.963243	0.0627243	0.615885	-0.330367	0.795334	0.0989937	0.407638	-0.440001	0.737134	0.573528	1	0.114619	1.08269	0.123885	0.89368	-0.142659	0.905848	0.214416	0.889316	-0.257278	0.836665	0.176536	0.67544	-0.394085	0.760972	0.162157	1	-0.211362	0.863722	30.7239	30.7749	30.7814	30.5662	30.1974	30.2002	30.2915	30.595	30.8921	30.489	30.7886
Q9CZM2	60S ribosomal protein L15	Rpl15	0.0820006	0.824933	0.113184	1.08161	0.621604	0.96369	-0.096965	0.934998	0.248842	0.786984	-0.210149	0.864448	0.181823	0.699729	-0.218584	0.859408	0.421533	1	0.0460059	1.0324	0.6144	0.918702	-0.158519	0.895944	0.516729	0.95387	-0.204525	0.867824	0.0479443	0.802996	-0.151265	0.900461	0.740402	1	-0.137205	0.909279	31.0071	30.9892	31.0548	30.8972	30.8308	30.7355	30.8937	30.9753	30.9342	30.9041	31.0994
P62281	40S ribosomal protein S11	Rps11	0.0857612	0.837143	-0.106378	0.928918	0.375439	0.916316	-0.133027	0.911916	0.836495	0.978645	-0.0266495	0.981698	0.465432	0.974908	-0.0145826	0.989943	0.0689495	0.966741	-0.160957	0.894432	0.418323	0.896815	-0.195651	0.873179	0.878028	1	-0.034694	0.976239	0.0684096	0.852919	-0.121648	0.919137	0.636689	1	-0.141759	0.906413	30.838	30.9121	30.717	30.8138	30.8678	30.8395	30.9674	31.0356	30.9229	30.8764	30.8601
Q9WUM3	Coronin-1B	Coro1b	0.244752	0.921541	-0.0613649	0.958357	0.0719374	0.890249	0.145104	1.10581	0.0079392	0.695833	0.206469	1.15386	0.0103053	0.507612	0.235247	1.17711	0.840744	0.998864	0.00980759	1.00682	0.117697	0.831023	0.197092	1.14639	0.104349	0.895499	0.187284	1.13862	0.00837857	0.847919	0.112008	1.08073	0.617743	1	0.0640456	1.04539	30.8097	30.9913	30.9163	30.8379	31.031	31.0037	30.8851	30.9061	30.9249	30.7623	30.8019
Q91VR7	Microtubule-associated proteins 1A/1B light chain 3A	Map1lc3a	0.27173	0.949324	-0.0365973	0.974952	0.184022	0.941691	-0.0849798	0.942798	0.363919	0.948558	-0.0483826	0.96702	0.81563	0.973134	-0.0220518	0.984831	0.986129	1	-0.000617981	0.999572	0.424075	0.959274	-0.0665544	0.954916	0.436365	0.97853	-0.0659364	0.955325	0.386965	0.981183	0.0376972	1.02647	0.958771	1	-0.00618744	0.99572	30.5565	30.6719	30.6482	30.6001	30.6561	30.7007	30.6373	30.6871	30.5976	30.7805	30.6203
Q64105	Sepiapterin reductase	Spr	0.105647	0.820189	-0.123201	0.918148	0.168417	0.893214	-0.169939	0.88888	0.68983	0.956974	-0.0467377	0.968123	0.600015	0.885534	0.0943241	1.06757	0.360226	0.999093	-0.0252132	0.982675	0.343562	0.89659	-0.165992	0.891315	0.414805	0.965093	-0.140779	0.907029	0.00252916	0.675268	0.231602	1.17414	0.988753	1	-0.00350094	0.997576	30.7846	30.8382	30.7871	30.7928	31.0537	31.072	30.7968	30.8591	30.8379	31.1211	30.816
P29341	Polyadenylate-binding protein 1	Pabpc1	0.314433	0.950598	0.0306008	1.02144	0.000919148	0.941818	0.071441	1.05077	0.141183	0.949743	0.0408401	1.02871	0.469261	0.939194	0.0345974	1.02427	0.398347	1	0.0366929	1.02576	0.0123305	0.909214	0.0816949	1.05826	0.315333	0.984486	0.045002	1.03168	0.960629	1	0.00297991	1.00207	0.509733	1	0.0133845	1.00932	30.9017	30.9385	30.9292	30.8964	30.8486	30.9267	30.8431	30.9578	30.853	30.8529	30.8532
Q9D394	Protein RUFY3	Rufy3	0.29204	0.945999	0.0382465	1.02687	0.666751	0.98816	-0.0303009	0.979216	0.265775	0.921707	-0.0685474	0.953598	0.414716	0.884702	-0.0767679	0.948179	0.352435	1	0.0460803	1.03246	0.877591	0.992025	-0.0169868	0.988295	0.541298	0.982113	-0.0630671	0.957227	0.84716	1	0.00866636	1.00603	0.87224	1	0.0223672	1.01562	30.9131	30.8473	30.9905	30.954	30.8399	30.9465	30.8978	30.8876	30.8682	31.023	30.9169
Q9D819	Inorganic pyrophosphatase	Ppa1	0.545379	0.957662	0.0263793	1.01845	0.25733	0.935929	0.095209	1.06822	0.368317	0.926164	0.0688297	1.04887	0.738059	0.973848	0.0189171	1.0132	0.334376	1	0.0610892	1.04325	0.198863	0.887249	0.163194	1.11976	0.424996	0.977237	0.102105	1.07334	0.608081	0.98243	0.039554	1.0278	0.434593	1	0.122742	1.0888	30.8504	30.9664	30.8844	30.9269	30.8725	30.9363	30.9119	30.9185	30.7641	30.8479	30.923
Q9CR21	Acyl carrier protein, mitochondrial	Ndufab1	0.443175	0.86559	0.116893	1.0844	0.0954226	0.852018	0.224832	1.16864	0.473518	0.903524	0.107939	1.07769	0.818957	0.938226	-0.0660458	0.955253	0.88607	1	0.03114	1.02182	0.104666	0.766529	0.255068	1.19339	0.304787	0.916096	0.223928	1.16791	0.4114	0.847214	-0.224582	0.855843	0.766599	1	0.0653919	1.04637	31.0349	31.1239	31.1774	30.8524	30.72	30.8711	31.1007	31.2792	30.6804	30.6194	31.1037
Q8BW96	Calcium/calmodulin-dependent protein kinase type 1D	Camk1d	0.605175	0.93634	-0.0680058	0.953956	0.661068	0.96934	0.0901234	1.06446	0.364658	0.844538	0.158129	1.11584	0.141034	0.647876	-0.242004	0.84557	0.410783	1	-0.157481	0.896589	0.322518	0.838482	0.267404	1.20364	0.0852831	0.800791	0.424885	1.34247	0.176256	0.790267	-0.197378	0.872134	0.130084	1	0.469512	1.38464	30.7769	30.5485	31.0519	30.604	30.5929	30.7969	31.0196	30.8246	30.8326	30.937	30.9368
Q3THE2	Myosin regulatory light chain 12B	Myl12b	0.678044	0.946534	-0.0519187	0.964653	0.821475	0.994123	-0.0265414	0.981771	0.844316	0.978352	0.0253773	1.01775	0.250387	0.908511	-0.0479755	0.967293	0.67755	1	-0.0850652	0.942742	0.953398	0.9964	-0.0107861	0.992552	0.756148	0.990025	0.0742791	1.05283	0.911915	0.993071	-0.025945	0.982177	0.65123	1	0.0963097	1.06904	30.9551	30.6946	30.8946	31.0029	30.9237	30.9227	31.2555	30.68	30.9118	30.9412	31.0011
Q8BTI8	Serine/arginine repetitive matrix protein 2	Srrm2	0.204195	0.775931	0.240665	1.18154	0.43425	0.944239	0.0956759	1.06857	0.428299	0.871588	-0.144989	0.904386	0.41254	0.722914	-0.344176	0.787758	0.60985	1	0.035073	1.02461	0.888697	0.994173	0.0228748	1.01598	0.934862	0.998696	-0.0121981	0.991581	0.140039	0.671062	-0.451087	0.731491	0.610162	1	-0.119109	0.920756	30.7974	30.7067	30.5832	30.8003	30.5136	29.9076	30.6451	30.6742	30.6657	30.4113	30.6982
Q9D6J5	NADH dehydrogenase [ubiquinone] 1 beta subcomplex subunit 8, mitochondrial	Ndufb8	0.755915	0.975363	0.0160548	1.01119	0.340804	0.940333	0.101389	1.07281	0.379703	0.909428	0.0853344	1.06093	0.620199	0.888434	0.0932436	1.06677	0.83886	0.998563	0.0147851	1.0103	0.506582	0.935125	0.0948467	1.06795	0.592481	0.976905	0.0800616	1.05706	0.656852	0.983239	0.0408414	1.02871	0.897594	1	0.0276594	1.01936	30.8415	30.6994	30.8131	30.8005	30.7482	30.846	30.8535	30.6533	30.762	30.5509	30.8568
Q9CPY7	Cytosol aminopeptidase	Lap3	0.499856	0.939124	-0.0506763	0.965484	0.0367109	0.881221	0.167784	1.12333	0.0190028	0.69645	0.21846	1.16349	0.0574071	0.467605	0.309631	1.23939	0.632956	1	0.0418167	1.02941	0.0700542	0.802576	0.199496	1.1483	0.228569	0.912985	0.157679	1.11549	0.248237	0.852868	0.144746	1.10554	0.954665	1	-0.0072066	0.995017	30.885	30.9926	31.0154	31.0622	31.1211	31.1316	30.8818	31.1362	30.9268	30.8941	30.7393
Q6PCP5	Mitochondrial fission factor	Mff	0.595324	0.939167	-0.0561966	0.961796	0.585315	0.971864	-0.054829	0.962709	0.988447	0.998378	0.00136757	1.00095	0.544857	0.885374	0.090066	1.06442	0.932056	1	-0.0125853	0.991314	0.658765	0.965926	-0.07035	0.952407	0.697549	0.991531	-0.0577647	0.960752	0.406333	0.888368	0.134375	1.09762	0.931935	1	-0.0134554	0.990717	30.5692	30.3851	30.4682	30.7325	30.7767	30.5745	30.5193	30.3959	30.7085	30.6584	30.5127
Q9DCW4	Electron transfer flavoprotein subunit beta	Etfb	0.665165	0.973695	-0.0162051	0.98883	0.223946	0.960143	0.0627618	1.04446	0.0499026	0.888836	0.0789669	1.05626	0.125765	0.837411	0.0868406	1.06204	0.831939	0.996214	0.0110512	1.00769	0.301391	0.923897	0.0847689	1.06052	0.268446	0.979419	0.0737178	1.05243	0.418474	0.985559	0.0291414	1.0204	0.837998	1	0.0160185	1.01117	30.8878	30.9653	30.8644	31.0209	30.9383	30.9983	30.9486	30.9624	30.9065	30.8977	30.8652
P63242	Eukaryotic translation initiation factor 5A-1	Eif5a	0.596039	0.945482	0.0468311	1.03299	0.222656	0.893258	0.171334	1.1261	0.318975	0.870368	0.124503	1.09013	0.974014	0.990421	0.00966358	1.00672	0.814339	1	-0.0240161	0.983491	0.306802	0.899284	0.177046	1.13057	0.216174	0.90132	0.201062	1.14954	0.362522	0.886102	-0.122549	0.918563	0.791118	1	0.0688496	1.04888	30.9106	30.6905	30.9714	30.8079	30.5984	30.851	30.945	30.8191	30.7777	30.4845	30.9456
Q80TL0	Protein phosphatase 1E	Ppm1e	0.675168	0.959538	-0.0270831	0.981403	0.302509	0.935784	0.099236	1.07121	0.191318	0.843881	0.126319	1.09151	0.771165	0.955986	0.038105	1.02676	0.879983	0.996923	0.0146688	1.01022	0.0878726	0.814759	0.199797	1.14854	0.197507	0.911749	0.185129	1.13692	0.7404	0.985922	0.0403465	1.02836	0.266584	1	0.18737	1.13869	30.7203	30.8183	30.8773	30.7727	30.8491	30.8477	30.9567	30.6588	30.8087	30.6957	30.9249
P51150	Ras-related protein Rab-7a	Rab7a	0.89265	0.987175	0.00592737	1.00412	0.0204344	0.877375	0.168022	1.12352	0.00825092	0.764385	0.162095	1.11891	0.256821	0.730615	0.185145	1.13693	0.70209	0.994679	0.0256735	1.01795	0.0282379	0.817247	0.172401	1.12693	0.0378903	0.900678	0.146728	1.10706	0.976159	1	0.00178464	1.00124	0.718306	1	-0.0366329	0.974928	30.8428	30.8751	31.0108	30.8709	30.8863	30.9038	30.9715	30.8821	30.8262	30.5924	30.8274
Q9QXL2	Kinesin-like protein KIF21A	Kif21a	0.0554127	0.821853	-0.121034	0.919528	0.859943	0.995974	-0.00963192	0.993346	0.123396	0.846748	0.111403	1.08028	0.085497	0.655485	0.211877	1.15819	0.269017	1	-0.0733865	0.950404	0.717928	0.991857	-0.0289669	0.980122	0.656916	0.995013	0.0444196	1.03127	0.164488	0.849249	0.135851	1.09874	0.785308	1	-0.031606	0.978331	30.6942	30.6685	30.6473	30.6865	30.8983	30.855	30.6972	30.8521	30.6731	30.6021	30.7274
Q9CQ54	NADH dehydrogenase [ubiquinone] 1 subunit C2	Ndufc2	0.797171	0.963425	-0.025625	0.982395	0.51793	0.972264	-0.0526831	0.964142	0.749353	0.975922	-0.027058	0.98142	0.192206	0.770484	0.130177	1.09443	0.50686	1	0.0786839	1.05605	0.675321	0.975143	-0.0531979	0.963798	0.228546	0.944244	-0.131882	0.91264	0.0432226	0.680026	0.24635	1.1862	0.893063	1	-0.0157089	0.98917	30.5567	30.4338	30.5555	30.7501	30.7489	30.7461	30.5199	30.3952	30.5883	30.5501	30.6845
Q9CQI3	Glia maturation factor beta	Gmfb	0.476674	0.939766	-0.0484085	0.967002	0.949171	0.996361	0.00999146	1.00695	0.690491	0.949989	0.0584	1.04131	0.118853	0.848106	-0.0772438	0.947867	0.986721	1	-0.00117747	0.999184	0.429022	0.908896	0.147652	1.10776	0.442832	0.96605	0.148829	1.10867	0.127893	0.813501	0.163856	1.12028	0.164432	1	0.389928	1.31033	30.8402	30.7775	30.7072	30.8161	30.9027	30.9613	30.7188	30.7012	30.8844	31.0102	31.0083
Q8BL97	Serine/arginine-rich splicing factor 7	Srsf7	0.19401	0.823038	0.12599	1.09126	0.00605177	0.62999	0.320362	1.24864	0.101987	0.773574	0.194371	1.14423	0.352684	0.720867	0.269028	1.205	0.00329687	0.944932	0.16961	1.12475	0.0739516	0.673096	0.31421	1.24333	0.332316	0.95146	0.144601	1.10542	0.516271	0.915918	0.122099	1.08832	0.98993	1	-0.00232792	0.998388	31.0844	31.0519	31.097	31.0415	30.7957	31.2363	30.8956	30.8567	30.9293	30.7064	30.7875
Q8BKZ9	Pyruvate dehydrogenase protein X component, mitochondrial	Pdhx	0.315876	0.928626	-0.0594621	0.959622	0.474078	0.969478	0.053971	1.03812	0.129827	0.845161	0.113433	1.0818	0.51885	0.914394	0.0500822	1.03532	0.577778	1	-0.0480792	0.967223	0.223445	0.909881	0.107588	1.07743	0.132732	0.91101	0.155667	1.11394	0.471709	0.954126	0.0667318	1.04734	0.133272	1	0.172317	1.12687	30.8562	30.6949	30.8351	30.8548	30.9332	30.8863	30.9659	30.7847	30.7784	30.7995	30.9198
P62743	AP-2 complex subunit sigma	Ap2s1	0.244094	0.820688	0.153059	1.11192	0.143776	0.845361	0.269302	1.20522	0.493562	0.899765	0.116243	1.08391	0.923365	0.983903	0.0201187	1.01404	0.562723	1	0.116352	1.08399	0.285475	0.825293	0.296677	1.22831	0.541101	0.962738	0.180325	1.13314	0.610516	0.935435	-0.116023	0.922728	0.897135	1	0.0441834	1.0311	30.7862	30.9983	30.8162	30.6605	30.5503	30.635	30.9311	30.7886	30.4063	30.3923	30.7527
Q6ZWV3;P86048	60S ribosomal protein L10;60S ribosomal protein L10-like	Rpl10;Rpl10l	0.293631	0.879183	-0.0853165	0.942578	0.659567	0.969801	-0.088924	0.940224	0.983854	0.994781	-0.00360756	0.997503	0.0988625	0.925375	-0.0378761	0.974088	0.124887	0.995486	-0.142385	0.90602	0.704977	0.956724	-0.123147	0.918182	0.951177	0.998025	0.0192382	1.01342	0.00587518	0.686203	-0.201436	0.869684	0.729547	1	-0.144322	0.904804	30.8828	31.0967	30.8535	30.9803	30.9244	30.9111	31.1613	31.0883	31.108	30.9446	30.9666
Q99K85	Phosphoserine aminotransferase	Psat1	0.11648	0.805685	-0.145888	0.903823	0.474051	0.946298	-0.0960233	0.935608	0.659245	0.952352	0.0498646	1.03517	0.475431	0.84307	0.121229	1.08766	0.450911	1	-0.095981	0.935636	0.612584	0.949129	-0.0936928	0.937121	0.990228	0.999478	0.00228818	1.00159	0.908783	1	0.0138744	1.00966	0.669708	1	-0.105067	0.929762	30.4887	30.6989	30.7785	30.5211	30.7706	30.7814	30.6802	30.9346	30.6717	30.7938	30.5158
P70336	Rho-associated protein kinase 2	Rock2	0.66352	0.960705	0.0242537	1.01695	0.0547175	0.961868	-0.0564199	0.961647	0.11748	0.890253	-0.0806736	0.945616	0.0852607	0.771453	-0.114148	0.923928	0.913737	0.999265	-0.00915146	0.993677	0.112789	0.933697	-0.0675087	0.954284	0.480497	0.98151	-0.0583572	0.960357	0.523025	0.957439	-0.0689891	0.953306	0.697266	1	-0.0131982	0.990893	30.7291	30.6491	30.7192	30.7494	30.6617	30.6304	30.8616	30.63	30.6536	30.7923	30.7282
Q8BNW9	Kelch repeat and BTB domain-containing protein 11	Kbtbd11	0.455166	0.953162	0.0361926	1.0254	0.111525	0.899175	0.13829	1.1006	0.162538	0.873165	0.102097	1.07333	0.666105	0.959569	0.0275316	1.01927	0.325454	1	0.0699774	1.0497	0.0752084	0.789156	0.221785	1.16618	0.190474	0.914383	0.151808	1.11096	0.753928	0.990888	0.0220779	1.01542	0.290014	1	0.146354	1.10677	30.7829	30.9143	30.9309	30.803	30.8585	30.8112	30.8781	30.7195	30.8407	30.7577	30.8569
Q6PFD5	Disks large-associated protein 3	Dlgap3	0.421368	0.886379	0.0926924	1.06636	0.422726	0.919945	0.147562	1.1077	0.728608	0.953502	0.0548695	1.03877	0.48201	0.826114	-0.144355	0.904784	0.834589	0.998193	0.0372925	1.02619	0.401358	0.898741	0.224978	1.16876	0.470687	0.948734	0.187686	1.13894	0.53505	0.932638	-0.103062	0.931055	0.493519	1	0.228978	1.172	31.1576	31.2666	31.1738	30.8622	30.9648	30.9562	31.2603	30.8646	31.0658	30.9364	31.2734
Q99JY0	Trifunctional enzyme subunit beta, mitochondrial	Hadhb	0.571257	0.941856	0.0492169	1.0347	0.804156	0.99265	0.0206063	1.01439	0.658468	0.971014	-0.0286106	0.980364	0.770356	0.957175	-0.0373554	0.97444	0.328347	1	0.116515	1.08411	0.301339	0.913722	0.0937341	1.06713	0.814162	1	-0.0227807	0.984334	0.806487	0.990074	0.0287091	1.0201	0.681824	1	0.0432838	1.03046	30.6958	30.8582	30.846	31.0529	30.8674	30.7951	30.6438	30.9054	30.8583	30.9745	30.7626
G3UXL2;Q9D7G0	Pribosyltran_N domain-containing protein;Ribose-phosphate pyrophosphokinase 1	Prps1l3;Prps1	0.0442914	0.80716	0.131911	1.09574	0.0284898	0.850911	0.198892	1.14782	0.257501	0.922344	0.0669807	1.04752	0.545042	0.935891	0.0401974	1.02825	0.169113	1	0.140289	1.10213	0.11312	0.788128	0.225126	1.16888	0.411845	0.977514	0.0848363	1.06057	0.973602	1	0.00208282	1.00144	0.706061	1	0.0467218	1.03292	30.8547	30.7429	30.9887	30.9229	30.7116	30.7817	30.8002	30.7668	30.6667	30.6632	30.7497
Q920P5	Adenylate kinase isoenzyme 5	Ak5	0.5315	0.854935	0.153575	1.11232	0.541847	0.947651	0.123334	1.08925	0.885864	0.977827	-0.0302406	0.979257	0.806023	0.940313	0.0583525	1.04128	0.419851	0.993286	0.311272	1.2408	0.457542	0.897353	0.221969	1.16632	0.803437	0.991785	-0.0893027	0.939977	0.582431	0.887638	0.226764	1.17021	0.792692	1	0.0791089	1.05637	30.789	31.4175	31.0283	30.725	31.0464	30.8985	30.645	30.3142	31.2779	31.1092	30.719
P62751	60S ribosomal protein L23a	Rpl23a	0.872511	0.986903	-0.00856829	0.994079	0.522658	0.958527	-0.0832822	0.943908	0.504514	0.924737	-0.0747139	0.94953	0.584117	0.983703	0.0117426	1.00817	0.871321	0.995416	-0.0140743	0.990292	0.469661	0.912041	-0.146426	0.903486	0.500235	0.971819	-0.132352	0.912343	0.698189	0.992685	-0.027434	0.981164	0.496208	1	-0.171528	0.887902	30.6878	30.8378	30.6302	30.661	30.7026	30.69	30.7263	30.8084	30.6365	30.6675	30.7016
Q8VHH5	Arf-GAP with GTPase, ANK repeat and PH domain-containing protein 3	Agap3	0.271228	0.839413	0.123886	1.08967	0.514902	0.957737	0.0839403	1.05991	0.730755	0.963427	-0.039946	0.972691	0.0834187	0.605682	-0.259262	0.835515	0.687182	1	0.0625312	1.0443	0.38548	0.900226	0.168796	1.12412	0.548508	0.976135	0.106265	1.07644	0.253158	0.833708	-0.175595	0.885402	0.366197	1	0.189932	1.14071	30.6394	30.779	30.7922	30.4535	30.4838	30.3898	30.6043	30.4563	30.7765	30.7607	30.6313
Q8BH66	Atlastin-1	Atl1	0.270023	0.931546	0.0543383	1.03838	0.616752	0.98676	-0.0336737	0.976929	0.235789	0.890243	-0.0880119	0.940818	0.790196	0.973307	0.0216341	1.01511	0.160926	1	0.0836233	1.05968	0.446102	0.94268	-0.077486	0.947708	0.194007	0.913478	-0.161109	0.894337	0.311033	0.914296	0.0923026	1.06607	0.511923	1	-0.0904408	0.939236	30.7392	30.6977	30.7232	30.7052	30.6587	30.776	30.7078	30.6263	30.5412	30.6552	30.7363
Q9CQH3	NADH dehydrogenase [ubiquinone] 1 beta subcomplex subunit 5, mitochondrial	Ndufb5	0.595673	0.949168	-0.0424205	0.971024	0.696128	0.984758	0.0360105	1.02527	0.278995	0.909673	0.0784309	1.05587	0.0362267	0.583406	0.231762	1.17427	0.802124	0.996041	0.0275319	1.01927	0.978297	0.996669	0.00374222	1.0026	0.802689	1	-0.0237897	0.983645	0.0513017	0.824396	0.138663	1.10088	0.371594	1	-0.116888	0.922174	30.6561	30.5627	30.6808	30.8986	30.7969	30.8534	30.6438	30.6715	30.7442	30.5579	30.6289
Q9CPV4	Glyoxalase domain-containing protein 4	Glod4	0.91188	0.987091	-0.00577145	0.996008	0.609094	0.980332	-0.0433882	0.970373	0.650568	0.962097	-0.0376167	0.974263	0.965547	0.994454	0.00322819	1.00224	0.809207	0.998324	-0.01839	0.987334	0.529475	0.943726	-0.0832367	0.943938	0.649249	0.982713	-0.0648467	0.956047	0.728094	0.986353	-0.0354128	0.975753	0.543309	1	-0.103488	0.93078	30.7023	30.715	30.7635	30.647	30.752	30.631	30.6668	30.8524	30.6614	30.7151	30.6614
Q8CAA7	Glucose 1,6-bisphosphate synthase	Pgm2l1	0.946784	0.989032	0.00494852	1.00344	0.341737	0.950546	-0.077896	0.947438	0.328981	0.909656	-0.0828445	0.944194	0.392674	0.759018	-0.189274	0.877047	0.703342	1	-0.0330054	0.977382	0.649956	0.980236	-0.0448971	0.969359	0.898947	0.998043	-0.0118917	0.991791	0.427073	0.918277	-0.102761	0.931249	0.610516	1	0.0746212	1.05308	30.5509	30.6648	30.5683	30.4574	30.3759	30.6116	30.6539	30.647	30.4886	30.5535	30.8125
Q9Z268	RasGAP-activating-like protein 1	Rasal1	0.850046	0.98746	-0.0102828	0.992898	0.425891	0.946861	-0.100812	0.932508	0.448649	0.910782	-0.0905289	0.939178	0.265587	0.840481	0.096386	1.06909	0.276923	1	0.04927	1.03474	0.402279	0.905306	-0.165869	0.891392	0.295541	0.921953	-0.215139	0.861463	0.0648926	0.803282	0.15584	1.11407	0.545878	1	-0.155684	0.897706	30.7588	30.7058	30.777	30.7601	30.8079	30.9005	30.7498	30.6375	30.7078	30.7151	30.8005
A2AQ25	Sickle tail protein	Skt	0.0373696	0.715188	0.225104	1.16886	0.280779	0.891876	-0.191664	0.875595	0.0317902	0.558212	-0.416768	0.749101	0.328601	0.713392	-0.278066	0.824696	0.177004	1	0.0998764	1.07168	0.0178193	0.495839	-0.40936	0.752958	0.0133837	0.683277	-0.509236	0.702594	0.107511	0.732589	-0.239143	0.847249	0.0982361	1	-0.470313	0.721808	30.602	30.5009	30.458	30.4925	30.2409	30.0486	30.3151	30.334	30.5026	30.2283	30.6174
Q3UM45	Protein phosphatase 1 regulatory subunit 7	Ppp1r7	0.416251	0.952898	-0.0352923	0.975834	0.988035	0.99913	0.00120783	1.00084	0.635483	0.962718	0.0365002	1.02562	0.736951	0.920158	-0.0691328	0.953211	0.123089	1	-0.0743624	0.949762	0.657804	0.992227	0.0325597	1.02283	0.18287	0.966402	0.106922	1.07693	0.131967	0.883338	-0.10089	0.932458	0.652899	1	0.0751654	1.05348	30.6413	30.6237	30.704	30.6115	30.5699	30.6698	30.6717	30.7509	30.7397	30.5168	30.8612
O54774	AP-3 complex subunit delta-1	Ap3d1	0.91551	0.986922	-0.00997038	0.993113	0.138735	0.936542	0.0886872	1.0634	0.264053	0.886299	0.0986576	1.07078	0.0287504	0.539783	0.245179	1.18524	0.391161	1	0.0760848	1.05415	0.394401	0.938552	0.0770613	1.05487	0.991857	1	0.000976562	1.00068	0.0566754	0.671826	0.262036	1.19917	0.844526	1	0.0178334	1.01244	30.8656	30.8575	30.818	30.6961	30.9342	31.0188	30.7318	30.8131	30.5984	30.7354	30.7272
Q9WV69	Dematin	Dmtn	0.272271	0.858978	0.0988188	1.0709	0.479598	0.966445	0.0714071	1.05074	0.805289	0.977563	-0.0274117	0.981179	0.227062	0.724445	-0.183481	0.880576	0.632991	1	0.0533835	1.0377	0.40975	0.911124	0.130018	1.09431	0.670818	0.980064	0.0766347	1.05456	0.420257	0.886431	-0.13542	0.910405	0.535097	1	0.124696	1.09028	30.7227	30.7208	30.7213	30.8306	30.4691	30.6685	30.69	30.5442	30.8785	30.7897	30.7148
E9Q401	Ryanodine receptor 2	Ryr2	0.379267	0.931629	-0.0593944	0.959667	0.482332	0.96903	0.0653001	1.0463	0.130668	0.834619	0.124694	1.09028	0.319118	0.898974	-0.054554	0.962892	0.430515	1	-0.0763747	0.948438	0.176012	0.876704	0.167819	1.12336	0.0482075	0.862809	0.244193	1.18443	0.244251	0.90449	-0.0937732	0.937069	0.123682	1	0.204974	1.15267	30.6752	30.8364	30.823	30.6125	30.7166	30.7633	30.9252	30.7604	30.8155	30.7602	30.8288
Q68EF6	Brain-enriched guanylate kinase-associated protein	Begain	0.307981	0.819047	0.171262	1.12604	0.607604	0.944965	0.140341	1.10217	0.906023	0.980779	-0.0309212	0.978795	0.221784	0.507642	-0.526275	0.694345	0.868368	1	0.0263131	1.01841	0.389618	0.842403	0.325628	1.25321	0.422905	0.912434	0.299314	1.23056	0.256109	0.749553	-0.31552	0.803561	0.323242	1	0.510069	1.42412	30.8062	30.6804	30.9396	30.5735	30.635	30.1437	30.8642	30.5153	30.7351	30.7429	31.0883
Q5SYD0	Unconventional myosin-Id	Myo1d	0.0363094	0.612831	-0.305692	0.809054	0.183422	0.818763	-0.379795	0.768547	0.765452	0.95168	-0.0741032	0.949932	0.818191	0.945548	-0.0565681	0.961549	0.0375662	0.88591	-0.362727	0.777693	0.283767	0.762326	-0.44852	0.732794	0.830913	0.995171	-0.0857932	0.942266	0.15047	0.721214	-0.279848	0.823678	0.573658	1	-0.309073	0.80716	30.1482	30.4343	30.2861	30.383	30.4928	30.4086	30.5815	30.9457	30.6644	30.7195	30.295
O55100	Synaptogyrin-1	Syngr1	0.162931	0.844976	0.098299	1.07051	0.759537	0.986476	0.0394749	1.02774	0.600304	0.948502	-0.0588242	0.960046	0.221599	0.719575	-0.193891	0.874245	0.515542	1	0.0681229	1.04835	0.591992	0.942315	0.099343	1.07129	0.86014	1	0.0312201	1.02188	0.653332	0.983916	-0.041825	0.971425	0.454476	1	0.183286	1.13547	30.7529	30.7927	30.7496	30.555	30.5523	30.6259	30.7418	30.5289	30.6222	30.6788	30.8873
Q9R0P3	S-formylglutathione hydrolase	Esd	0.864998	0.987909	0.00897312	1.00624	0.134656	0.937758	0.0868475	1.06205	0.120504	0.902409	0.0778744	1.05546	0.799055	0.973048	0.0218468	1.01526	0.893497	0.999694	0.00994174	1.00691	0.118794	0.899785	0.125168	1.09063	0.0694383	0.934511	0.115226	1.08314	0.808252	0.989639	0.0193739	1.01352	0.0593952	1	0.112753	1.08129	30.8109	30.8772	30.796	30.6783	30.8643	30.7222	30.7773	30.8397	30.7045	30.7465	30.7963
Q9D2U9;Q8CGP0	Histone H2B type 3-A;Histone H2B type 3-B	Hist3h2ba;H2bu1	0.680164	0.938739	0.0776589	1.0553	0.409899	0.918402	-0.154341	0.898543	0.211657	0.773919	-0.232	0.851454	0.992321	0.996628	-0.00423908	0.997066	0.295129	0.992642	0.216099	1.16159	0.531855	0.907139	-0.167742	0.890235	0.0935232	0.843304	-0.383841	0.766395	0.394024	0.833776	0.250517	1.18963	0.663575	1	-0.129084	0.914412	30.23	30.0509	30.4487	30.6491	30.7499	30.0847	30.1209	30.2391	30.1404	30.2172	30.6259
P59281	Rho GTPase-activating protein 39	Arhgap39	0.341691	0.837023	0.138512	1.10077	0.287117	0.887776	0.201153	1.14962	0.734002	0.954012	0.0626415	1.04438	0.105137	0.499687	-0.338203	0.791026	0.910226	0.998423	0.0200685	1.01401	0.187961	0.748812	0.34994	1.27451	0.233833	0.888462	0.329871	1.2569	0.215597	0.750354	-0.289109	0.818408	0.23711	1	0.378966	1.30041	30.9591	31.0513	31.0503	30.742	30.7357	30.5417	31.0254	30.6671	31.0909	30.9075	31.0463
Q922B2	Aspartate--tRNA ligase, cytoplasmic	Dars1	0.334032	0.93847	-0.0441854	0.969837	0.125465	0.918935	0.105521	1.07588	0.0270811	0.789262	0.149707	1.10934	0.494255	0.867042	0.100548	1.07218	0.673977	0.995629	-0.0246836	0.983036	0.0576989	0.841503	0.157796	1.11558	0.0433874	0.895771	0.182479	1.13483	0.971001	1	0.00264994	1.00184	0.463509	1	0.0845814	1.06038	30.6967	30.7397	30.8427	30.7289	30.7416	30.854	30.8762	30.7494	30.7599	30.5898	30.8047
Q791T5	Mitochondrial carrier homolog 1	Mtch1	0.695616	0.953267	0.0469772	1.0331	0.245239	0.901267	-0.138916	0.908201	0.0488545	0.761608	-0.185894	0.879104	0.418547	0.821346	-0.132534	0.912228	0.91665	0.996805	0.018678	1.01303	0.28775	0.874971	-0.202789	0.868869	0.112718	0.898454	-0.221467	0.857693	0.791404	0.986892	-0.0408885	0.972056	0.273992	1	-0.129821	0.913945	30.5862	30.2873	30.5298	30.7982	30.6095	30.3483	30.4851	30.4026	30.6715	30.6231	30.5997
Q9Z0S1	3(2),5-bisphosphate nucleotidase 1	Bpnt1	0.879509	0.987113	0.00743532	1.00517	0.588061	0.98779	-0.0287761	0.980252	0.412543	0.957202	-0.0362114	0.975213	0.832432	0.987074	-0.00712109	0.995076	0.562063	1	0.0349814	1.02454	0.742209	0.989549	-0.0206235	0.985807	0.45977	0.979702	-0.0556049	0.962191	0.803304	0.990951	-0.017314	0.988071	0.382431	1	-0.0657978	0.955417	30.503	30.7016	30.6161	30.6051	30.559	30.6182	30.5761	30.6967	30.545	30.595	30.5965
Q80UG5	Septin-9	Septin9	0.522515	0.947084	0.0421149	1.02962	0.133414	0.90332	-0.125068	0.916961	0.0613755	0.782608	-0.167183	0.89058	0.884494	0.985697	-0.00876331	0.993944	0.220867	1	0.0792332	1.05646	0.126779	0.82968	-0.193563	0.874444	0.0635196	0.857562	-0.272796	0.827714	0.100324	0.817371	0.159876	1.11719	0.471501	1	-0.104157	0.930349	30.6642	30.5226	30.5343	30.6139	30.6803	30.5948	30.3846	30.5214	30.527	30.6146	30.6781
P48320	Glutamate decarboxylase 2	Gad2	0.0756844	0.847731	0.0901155	1.06446	0.734353	0.992182	-0.0141336	0.990251	0.0338192	0.844302	-0.104249	0.930289	0.176394	0.802733	-0.109482	0.926921	0.337044	1	0.0652631	1.04628	0.587863	0.985239	-0.0354977	0.975695	0.189911	0.961335	-0.100761	0.932541	0.600377	0.983162	-0.039889	0.97273	0.644272	1	-0.031168	0.978628	30.7815	30.8252	30.704	30.7087	30.5922	30.6894	30.6305	30.7702	30.6413	30.7283	30.7722
P63082	V-type proton ATPase 16 kDa proteolipid subunit	Atp6v0c	0.00397253	0.238095	1.34061	2.53259	0.116972	0.602826	0.701742	1.62647	0.159836	0.588329	-0.638868	0.642217	0.335504	0.530682	-1.09043	0.469622	0.0202493	0.641091	1.14217	2.20713	0.159545	0.547877	0.80434	1.74635	0.52006	0.922125	-0.337829	0.791231	0.260486	0.682876	-0.646833	0.638681	0.898566	1	0.105765	1.07607	31.8145	32.1681	32.3339	31.6649	30.7503	29.783	31.1622	31.1254	30.4528	30.6374	32.0768
Q641P0	Actin-related protein 3B	Actr3b	0.126864	0.8945	-0.0689859	0.953308	0.785141	0.980172	0.0657942	1.04666	0.533191	0.892707	0.13478	1.09793	0.0137198	0.696982	-0.155917	0.897562	0.107748	1	-0.109142	0.927139	0.535921	0.906438	0.219436	1.16428	0.372927	0.893065	0.328578	1.25578	0.355185	0.951734	-0.0709089	0.952038	0.39582	1	0.413587	1.33199	30.5475	30.4797	30.5343	30.4869	30.5491	30.5279	30.7088	30.5503	30.5692	30.6793	30.7096
Q8C0M9	Isoaspartyl peptidase/L-asparaginase	Asrgl1	0.940258	0.987171	0.00603533	1.00419	0.339261	0.948469	0.0896131	1.06408	0.369069	0.909982	0.0835777	1.05964	0.472437	0.798999	0.18083	1.13354	0.238801	1	0.0868937	1.06208	0.223505	0.909502	0.105637	1.07597	0.852564	1	0.0187429	1.01308	0.563701	0.954501	0.0812372	1.05792	0.62874	1	-0.08085	0.9455	30.6889	30.8608	30.8777	30.9085	30.7458	31.0075	30.8552	30.8582	30.673	30.5369	30.8548
Q9CZ44	NSFL1 cofactor p47	Nsfl1c	0.692467	0.963297	-0.0224386	0.984567	0.556813	0.987595	-0.029117	0.98002	0.861008	0.990804	-0.00667839	0.995382	0.832835	0.985193	0.0079155	1.0055	0.953722	0.997128	-0.00528526	0.996343	0.783592	0.989239	-0.0216929	0.985076	0.805939	1	-0.0164076	0.988692	0.649585	0.985155	0.0354169	1.02485	0.826766	1	0.0110938	1.00772	30.6924	30.5713	30.7765	30.7652	30.729	30.7611	30.6067	30.734	30.7881	30.7082	30.766
Q9D6J6	NADH dehydrogenase [ubiquinone] flavoprotein 2, mitochondrial	Ndufv2	0.828911	0.980864	0.0144545	1.01007	0.905186	0.99553	-0.0092001	0.993643	0.751351	0.976748	-0.0236546	0.983738	0.606932	0.884776	0.093339	1.06684	0.32371	1	0.0877616	1.06272	0.71331	0.992227	-0.0138887	0.990419	0.243807	0.965357	-0.10165	0.931966	0.429139	0.935995	0.0862497	1.06161	0.418805	1	-0.10874	0.927398	30.5314	30.7288	30.7022	30.6288	30.7079	30.6623	30.7257	30.5949	30.476	30.4391	30.7445
Q99LF4	RNA-splicing ligase RtcB homolog	Rtcb	0.225667	0.872013	-0.0863164	0.941925	0.703794	0.986685	-0.0352204	0.975883	0.486199	0.9496	0.051096	1.03605	0.836156	0.964844	0.0302906	1.02122	0.663532	1	-0.0406106	0.972243	0.840075	0.99028	0.0243556	1.01703	0.547251	0.981122	0.0649662	1.04606	0.713814	0.993559	0.0295181	1.02067	0.68211	1	0.0641937	1.0455	30.7269	30.9658	30.8989	30.7227	30.8786	30.9866	30.8281	30.9907	30.8905	31.0194	30.7852
Q9CZ30	Obg-like ATPase 1	Ola1	0.0143417	0.720135	0.211287	1.15772	0.0614119	0.833043	0.231481	1.17404	0.809597	0.979658	0.0201931	1.0141	0.114392	0.897923	-0.0489807	0.966619	0.104186	0.954065	0.215794	1.16134	0.154396	0.778575	0.282103	1.21597	0.662673	0.982343	0.066309	1.04703	0.780283	0.991088	-0.0192181	0.986767	0.614123	1	0.0960716	1.06886	31.0282	31.1863	31.1486	30.8961	30.8265	30.8574	30.8501	30.9493	30.7842	30.8814	30.9005
Q9WTX5	S-phase kinase-associated protein 1	Skp1	0.929118	0.987041	-0.00814266	0.994372	0.116137	0.901129	0.134234	1.09751	0.0955138	0.811826	0.142376	1.10372	0.420673	0.783075	0.176699	1.13029	0.344047	1	-0.0699425	0.952676	0.484884	0.972007	0.0495523	1.03494	0.252172	0.958416	0.119495	1.08635	0.996681	1	0.000646591	1.00045	0.610766	1	-0.0565573	0.961556	30.8897	30.63	30.6703	30.624	30.8695	30.5546	30.7643	30.7851	30.5848	30.6136	30.4571
Q91ZU6	Dystonin	Dst	0.054398	0.71687	-0.234824	0.849789	0.0597008	0.805555	-0.27677	0.825437	0.719312	0.962009	-0.041946	0.971344	0.902607	0.981561	0.0199575	1.01393	0.0942012	0.915677	-0.304064	0.809967	0.0500733	0.557823	-0.38728	0.76457	0.532498	0.978714	-0.0832151	0.943952	0.265263	0.843667	-0.168835	0.889561	0.157654	1	-0.272008	0.828166	30.316	30.4112	30.0904	30.4259	30.3713	30.5176	30.785	30.5307	30.524	30.3002	30.5488
Q9WV98	Mitochondrial import inner membrane translocase subunit Tim9	Timm9	0.878983	0.98669	0.00708284	1.00492	0.81926	0.991829	0.0306069	1.02144	0.84031	0.977874	0.0235241	1.01644	0.619754	0.880605	0.113742	1.08203	0.8751	0.997771	0.011308	1.00787	0.884019	0.993805	-0.0253131	0.982607	0.829372	1	-0.0366211	0.974936	0.988848	1	0.000943184	1.00065	0.583912	1	-0.14942	0.901613	30.6935	30.8135	30.6765	30.6368	30.6551	30.742	30.7652	30.7045	30.6232	30.3941	30.7756
O88643	Serine/threonine-protein kinase PAK 1	Pak1	0.413992	0.949908	-0.0374707	0.974362	0.0661738	0.898363	-0.114553	0.923668	0.209064	0.909375	-0.0770824	0.947973	0.79426	0.963068	-0.0315256	0.978385	0.447631	1	-0.04046	0.972345	0.0816314	0.870092	-0.147914	0.902555	0.246869	0.963484	-0.107454	0.928225	0.670397	0.985147	0.0376012	1.02641	0.731153	1	-0.0383269	0.973784	30.5522	30.484	30.4906	30.4658	30.4893	30.6271	30.5147	30.6057	30.4413	30.5091	30.6703
Q8CGK3	Lon protease homolog, mitochondrial	Lonp1	0.310704	0.925173	-0.0623591	0.957697	0.706675	0.991671	-0.0134086	0.990749	0.306181	0.943906	0.0489506	1.03451	0.140697	0.725064	0.160149	1.1174	0.932914	0.996832	0.00472514	1.00328	0.695056	0.988736	-0.0204563	0.985921	0.425188	1	-0.0251815	0.982697	0.0964422	0.832781	0.14088	1.10258	0.113537	1	-0.0444498	0.96966	30.5891	30.6622	30.6931	30.5407	30.7019	30.8344	30.6671	30.633	30.5817	30.5956	30.6204
P70398	Probable ubiquitin carboxyl-terminal hydrolase FAF-X	Usp9x	0.0740936	0.919239	-0.0578335	0.960706	0.407746	0.932616	-0.118917	0.920879	0.627629	0.949641	-0.0610836	0.958544	0.894718	0.984371	0.0118876	1.00827	0.229139	1	-0.0616805	0.958147	0.449624	0.904384	-0.171412	0.887973	0.626534	0.980042	-0.109731	0.926761	0.904854	1	-0.00708866	0.995099	0.666327	1	-0.128707	0.914651	30.6664	30.6637	30.6845	30.6391	30.7311	30.7029	30.7057	30.8033	30.6632	30.7832	30.627
B1AZP2	Disks large-associated protein 4	Dlgap4	0.123426	0.824521	0.120762	1.08731	0.714555	0.971655	0.0714934	1.0508	0.766796	0.960829	-0.0492683	0.966426	0.397022	0.768511	-0.181382	0.881858	0.513097	1	0.0700696	1.04977	0.710146	0.958127	0.108877	1.07839	0.890503	1	0.0388076	1.02726	0.53203	0.971063	-0.0496302	0.966184	0.665823	1	0.17056	1.12549	30.9233	30.8367	30.9225	30.6407	30.7142	30.6463	30.7527	30.6324	30.8045	30.6954	31.0279
Q80VP1	Epsin-1	Epn1	0.727356	0.967197	0.020048	1.01399	0.277784	0.91941	-0.111987	0.925312	0.160706	0.832399	-0.132035	0.912543	0.193901	0.627546	-0.328702	0.796253	0.650138	0.997746	-0.0326506	0.977622	0.614742	0.990702	-0.0335751	0.976996	0.984508	1	-0.000924428	0.999359	0.238154	0.901288	-0.0956237	0.935868	0.156949	1	0.232154	1.17459	30.6118	30.5927	30.6255	30.4439	30.4307	30.5514	30.6231	30.5138	30.6232	30.6602	30.9794
Q8CJ40	Rootletin	Crocc	0.0269938	0.656826	0.272115	1.20758	0.109374	0.895218	0.163081	1.11968	0.206186	0.869267	-0.109033	0.927209	0.205611	0.783569	-0.125739	0.916534	0.232186	0.990915	0.190732	1.14134	0.50799	0.937492	0.0928357	1.06646	0.445545	0.9787	-0.0978959	0.934395	0.347113	0.884387	-0.13544	0.910392	0.362733	1	-0.107596	0.928133	30.7351	30.6777	30.4273	30.7736	30.2407	30.3594	30.3576	30.338	30.6109	30.4589	30.3926
Q8CCT4	Transcription elongation factor A protein-like 5	Tceal5	0.592808	0.948309	-0.0433943	0.970369	0.988439	0.99936	0.00185413	1.00129	0.679085	0.95693	0.0452484	1.03186	0.50093	0.87735	0.0912476	1.06529	0.374133	1	-0.0628878	0.957346	0.796035	0.991139	-0.0483055	0.967072	0.9377	0.99829	0.0145823	1.01016	0.330703	0.908466	0.100445	1.0721	0.922529	1	0.0237802	1.01662	30.6927	30.3694	30.4779	30.5147	30.7032	30.5315	30.4616	30.6068	30.4823	30.5981	30.4541
Q8CHG7	Rap guanine nucleotide exchange factor 2	Rapgef2	0.974802	0.994998	0.00248661	1.00173	0.311952	0.912567	0.137029	1.09964	0.278977	0.843712	0.134542	1.09774	0.528046	0.896276	-0.0697241	0.95282	0.767008	0.99842	-0.0345128	0.976361	0.132984	0.787889	0.236207	1.17789	0.131095	0.875422	0.27072	1.20641	0.923907	1	-0.0129296	0.991078	0.120808	1	0.327515	1.25485	30.8549	30.7316	30.8293	30.6219	30.6928	30.8056	30.934	30.6251	30.7271	30.7461	30.8917
Q05512	Serine/threonine-protein kinase MARK2	Mark2	0.562743	0.937851	0.0605722	1.04288	0.928703	0.996782	0.00845699	1.00588	0.632388	0.949799	-0.0521152	0.964521	0.103969	0.569842	-0.290973	0.817351	0.623575	1	-0.0489082	0.966668	0.667908	0.973823	0.0582148	1.04118	0.414015	0.97253	0.107123	1.07708	0.0298078	0.671885	-0.292094	0.816716	0.536916	1	0.106002	1.07624	30.685	30.8148	30.7549	30.5737	30.4521	30.4905	30.8442	30.6537	30.7922	30.6621	30.8624
Q9DBF1	Alpha-aminoadipic semialdehyde dehydrogenase	Aldh7a1	0.554307	0.951628	0.0398916	1.02804	0.392267	0.96687	0.0640619	1.0454	0.665025	0.975129	0.0241703	1.01689	0.346741	0.837852	0.106739	1.07679	0.388577	1	0.0856756	1.06118	0.555662	0.968555	0.0548	1.03872	0.680612	1	-0.0308755	0.978826	0.637109	0.982751	0.0396846	1.02789	0.314072	1	-0.09793	0.934373	30.6258	30.8303	30.6028	30.803	30.7464	30.6524	30.5843	30.7598	30.635	30.5189	30.6664
P63037	DnaJ homolog subfamily A member 1	Dnaja1	0.643051	0.953522	0.0420783	1.0296	0.742349	0.99359	0.0281444	1.0197	0.723315	0.985951	-0.0139339	0.990388	0.457985	0.943867	0.0324297	1.02273	0.689521	1	0.0516872	1.03648	0.957787	0.994986	0.0068442	1.00476	0.34001	0.984297	-0.044843	0.969395	0.0706546	0.864634	0.110683	1.07974	0.503814	1	0.0334104	1.02343	30.6776	30.31	30.6977	30.6091	30.626	30.5698	30.5001	30.5255	30.4361	30.5873	30.5437
F6YVP7;P62270;A0A1Y7VKY1	Ribosomal protein S18, pseudogene 6;40S ribosomal protein S18	Rps18-ps6;Rps18	0.0944755	0.778747	-0.174897	0.885831	0.432922	0.941342	-0.111667	0.925518	0.615064	0.946239	0.0632294	1.0448	0.809291	0.975569	-0.0165348	0.988604	0.160512	0.965064	-0.200176	0.870445	0.705653	0.963339	-0.0837701	0.943589	0.602409	0.979843	0.116405	1.08403	0.23549	0.847711	-0.156452	0.897229	0.930523	1	-0.0235122	0.983835	30.4909	30.8027	30.533	30.5845	30.684	30.6835	30.7822	31.0019	30.7366	30.7605	30.6401
P14869	60S acidic ribosomal protein P0	Rplp0	0.464525	0.905924	-0.0838831	0.943515	0.697509	0.968717	-0.0865763	0.941755	0.98901	0.997715	-0.00269318	0.998135	0.546941	0.908292	-0.0594091	0.959657	0.296169	1	-0.116332	0.92253	0.813828	0.979584	-0.0812149	0.945261	0.917433	1	0.0351175	1.02464	0.0604353	0.694015	-0.242912	0.845038	0.739652	1	-0.148385	0.90226	30.6631	31.0785	30.8599	30.8274	30.7428	30.8479	31.1443	30.9524	31.018	30.9185	30.7909
Q9JI91	Alpha-actinin-2	Actn2	0.0941565	0.611364	0.389118	1.30959	0.00388248	0.479783	0.461662	1.37713	0.689074	0.948694	0.0725445	1.05157	0.616609	0.874499	0.125628	1.09098	0.23441	0.932827	0.435469	1.35235	0.0238653	0.5229	0.472624	1.38763	0.902753	1	0.0371552	1.02609	0.718504	0.952634	0.147801	1.10788	0.716664	1	0.0593281	1.04198	31.0437	31.121	30.7352	31.1216	30.6072	30.8027	30.9654	30.0124	30.6936	30.389	30.7697
Q9R1V6	Disintegrin and metalloproteinase domain-containing protein 22	Adam22	0.190114	0.919034	0.0621563	1.04403	0.304746	0.970202	-0.047979	0.96729	0.0227222	0.830587	-0.110135	0.926501	0.12777	0.768161	-0.121659	0.91913	0.544971	1	0.0344143	1.02414	0.208488	0.94003	-0.0680383	0.953934	0.187426	0.964731	-0.102453	0.931448	0.900708	1	0.00872707	1.00607	0.691701	1	0.0279338	1.01955	30.6565	30.4989	30.5589	30.537	30.5212	30.4906	30.5037	30.5787	30.4091	30.6733	30.5818
P63040	Complexin-1	Cplx1	0.980256	0.996589	0.0018404	1.00128	0.317012	0.971029	0.0588068	1.0416	0.490508	0.944494	0.0569664	1.04028	0.170408	0.783404	-0.120917	0.919603	0.65326	1	-0.0460008	0.968618	0.0397575	0.886615	0.129555	1.09396	0.166469	0.911342	0.175556	1.1294	0.33733	0.875714	-0.141031	0.906871	0.103815	1	0.155442	1.11376	30.7019	30.7391	30.7252	30.7443	30.6155	30.6668	30.9717	30.6852	30.6897	30.7105	30.8136
P62141	Serine/threonine-protein phosphatase PP1-beta catalytic subunit	Ppp1cb	0.197139	0.860867	-0.0910707	0.938826	0.656791	0.988665	-0.0302644	0.979241	0.250388	0.925612	0.0608063	1.04305	0.581247	0.925072	0.0489254	1.03449	0.991193	1	0.000572205	1.0004	0.224688	0.940966	0.0692991	1.04921	0.0517114	0.975928	0.0687269	1.04879	0.120792	0.879076	0.107177	1.07712	0.0536119	1	0.126979	1.092	30.424	30.6899	30.6324	30.5351	30.6668	30.7846	30.6432	30.6297	30.5828	30.7232	30.6304
Q9CS84	Neurexin-1	Nrxn1	0.552857	0.940113	0.0608255	1.04306	0.000477675	0.254067	0.527674	1.4416	0.000503705	0.397672	0.466848	1.38209	0.0586082	0.334145	0.518156	1.43212	0.803003	0.994912	0.0316054	1.02215	0.00784425	0.528106	0.464248	1.3796	0.0272262	0.680256	0.432643	1.3497	0.645521	0.958772	0.0753835	1.05364	0.938547	1	-0.0101299	0.993003	31.3652	31.0328	31.2331	31.1172	31.0859	31.2571	31.226	31.1706	30.8918	30.5538	30.7529
Q3THW5;P0C0S6	Histone H2A.V;Histone H2A.Z	H2az2;H2az1	0.639596	0.913309	0.113444	1.08181	0.832478	0.992321	-0.0325555	0.977687	0.448607	0.874087	-0.146	0.903753	0.906117	0.975667	0.0246611	1.01724	0.58952	1	0.199219	1.14808	0.808189	0.984009	-0.0605545	0.958895	0.428281	0.911443	-0.259774	0.835219	0.538679	0.864999	0.258588	1.19631	0.879132	1	-0.0258468	0.982244	30.5665	30.3147	30.9029	30.2699	30.3847	30.7257	29.866	30.8004	30.2234	30.6022	30.4589
Q64331	Unconventional myosin-VI	Myo6	0.190714	0.813311	-0.149635	0.901478	0.469258	0.96036	-0.0763184	0.948475	0.551973	0.9347	0.073317	1.05213	0.845549	0.970345	0.0275164	1.01926	0.102036	0.941262	-0.237289	0.848338	0.392245	0.909763	-0.133439	0.911656	0.548577	0.978146	0.103851	1.07464	0.209375	0.776687	-0.235359	0.849474	0.417546	1	-0.159025	0.89563	30.4375	30.4918	30.3512	30.5473	30.5735	30.3572	30.524	30.8536	30.7245	30.4994	30.3763
Q9CXW4	60S ribosomal protein L11	Rpl11	0.850113	0.987585	0.00791817	1.0055	0.754867	0.98659	-0.0423973	0.97104	0.684649	0.954429	-0.0503155	0.965725	0.885048	0.990424	0.00474358	1.00329	0.87069	0.9978	0.0111033	1.00773	0.731643	0.971102	-0.0759182	0.948738	0.705188	0.98015	-0.0870215	0.941464	0.933923	1	0.00715065	1.00497	0.770937	1	-0.0846144	0.943037	30.7454	30.7879	30.7315	30.7208	30.7618	30.7237	30.68	30.8565	30.6703	30.7162	30.7599
E9Q3L2	Phosphatidylinositol 4-kinase alpha	Pi4ka	0.582732	0.959221	-0.0243717	0.983249	0.24949	0.884827	-0.236783	0.848636	0.237788	0.794234	-0.212411	0.863094	0.298687	0.842257	-0.0972633	0.934805	0.803338	0.999946	-0.0174217	0.987997	0.345379	0.827433	-0.306598	0.808546	0.371295	0.900671	-0.289176	0.818369	0.888832	1	-0.00962989	0.993347	0.623216	1	-0.201543	0.86962	30.549	30.6029	30.6635	30.5103	30.6177	30.5824	30.6248	30.6842	30.52	30.7649	30.6297
P53810	Phosphatidylinositol transfer protein alpha isoform	Pitpna	0.943158	0.989115	-0.00490551	0.996606	0.694433	0.993257	-0.0218962	0.984937	0.813999	0.982879	-0.0169907	0.988292	0.216257	0.720043	-0.203146	0.868654	0.132728	1	-0.0807311	0.945578	0.638982	0.992	0.0263818	1.01845	0.0868633	0.948994	0.107113	1.07707	0.143221	0.812904	-0.169183	0.889346	0.0997716	1	0.141076	1.10273	30.5786	30.5201	30.6132	30.5046	30.3517	30.5633	30.6415	30.6629	30.5757	30.7027	30.6186
Q6ZWR6	Nesprin-1	Syne1	0.751553	0.962727	0.0230725	1.01612	0.931858	0.996709	-0.00685225	0.995262	0.715946	0.972514	-0.0299248	0.979471	0.524565	0.893841	-0.0674658	0.954313	0.825528	0.999971	0.0260881	1.01825	0.858427	0.994145	0.0211906	1.0148	0.972595	0.999137	-0.00489744	0.996611	0.882974	0.993397	-0.0196476	0.986474	0.776973	1	0.0429207	1.0302	30.4858	30.6428	30.494	30.451	30.5026	30.4645	30.6304	30.3187	30.5604	30.4648	30.6372
Q60631	Growth factor receptor-bound protein 2	Grb2	0.710628	0.974991	0.0162132	1.0113	0.434165	0.97271	0.0589848	1.04173	0.499782	0.953376	0.0427715	1.03009	0.291839	0.935692	-0.0348053	0.976163	0.277324	1	0.0575174	1.04067	0.127474	0.878698	0.152007	1.11111	0.341199	0.974568	0.0944894	1.06769	0.774138	0.991397	0.0170673	1.0119	0.242296	1	0.146362	1.10678	30.462	30.6258	30.6106	30.5633	30.5497	30.5692	30.6182	30.4743	30.5345	30.5717	30.6168
Q8R5M8	Cell adhesion molecule 1	Cadm1	0.29384	0.823909	0.140285	1.10212	0.774451	0.986834	0.0413104	1.02905	0.438569	0.907967	-0.0989742	0.933697	0.87663	0.964373	0.0408659	1.02873	0.188851	0.968153	0.194719	1.1445	0.989474	0.998038	0.00251834	1.00175	0.216615	0.910061	-0.192201	0.875269	0.074123	0.685407	0.26232	1.19941	0.903424	1	0.0292533	1.02048	30.6966	30.2495	30.6038	30.6305	30.692	30.4325	30.2991	30.3155	30.2852	30.3285	30.7142
Q9EPN1	Neurobeachin	Nbea	0.0414454	0.842487	0.0863572	1.06169	0.0380412	0.881389	0.165768	1.12176	0.223183	0.907762	0.0794109	1.05659	0.442828	0.915125	-0.0464907	0.968289	0.216493	1	0.0531521	1.03753	0.0261135	0.747332	0.216497	1.16191	0.0782	0.906935	0.163345	1.11988	0.59108	0.985446	-0.033597	0.976981	0.111523	1	0.176239	1.12993	30.7552	30.6578	30.7055	30.665	30.5407	30.6381	30.6868	30.5761	30.606	30.6305	30.6412
Q9QXV0	ProSAAS	Pcsk1n	0.826251	0.969219	-0.0224754	0.984542	0.861485	0.990558	-0.0205036	0.985888	0.987898	0.99892	0.00197182	1.00137	0.273784	0.713662	0.242026	1.18265	0.985611	1	-0.00231361	0.998398	0.234241	0.896741	-0.160378	0.894791	0.384501	0.951868	-0.158065	0.896227	0.515925	0.912611	0.130753	1.09487	0.197392	1	-0.269338	0.8297	30.6984	30.5602	30.5292	30.6202	30.8277	30.5781	30.4278	30.8052	30.4836	30.3576	30.5642
Q9CZX8	40S ribosomal protein S19	Rps19	0.335563	0.893557	-0.0813194	0.945193	0.592001	0.943772	-0.127695	0.915292	0.829673	0.969534	-0.046376	0.968366	0.148268	0.880832	-0.0664091	0.955012	0.0282232	0.969941	-0.150036	0.901228	0.62962	0.913625	-0.183057	0.880835	0.929721	1	-0.0330207	0.977372	0.0151631	0.681724	-0.245825	0.843334	0.670395	1	-0.212436	0.863078	30.6641	30.8274	30.7881	30.7321	30.7117	30.6618	30.9071	31.0018	30.8888	30.7386	30.7677
Q9WV60	Glycogen synthase kinase-3 beta	Gsk3b	0.882569	0.987116	-0.00782757	0.994589	0.982381	0.998917	-0.000781441	0.999458	0.885044	0.991437	0.00704613	1.0049	0.663624	0.954003	0.0330095	1.02314	0.933919	0.997387	0.00558472	1.00388	0.740507	0.994709	-0.00467809	0.996763	0.877568	0.998074	-0.0102628	0.992912	0.344496	0.924665	0.0907249	1.06491	0.39703	1	0.0474526	1.03344	30.6125	30.5089	30.5443	30.5099	30.6208	30.5916	30.6223	30.4068	30.5173	30.5095	30.6369
Q9JLZ3	Methylglutaconyl-CoA hydratase, mitochondrial	Auh	0.163696	0.927737	-0.0547359	0.962771	0.328321	0.957199	-0.0687187	0.953484	0.826119	0.9865	-0.0139828	0.990355	0.112729	0.895119	0.0513897	1.03626	0.370405	1	-0.0499948	0.96594	0.262026	0.910895	-0.107559	0.928157	0.568856	0.982399	-0.0575644	0.960885	0.677106	0.992842	-0.0279932	0.980784	0.280188	1	-0.136947	0.909441	30.3619	30.4378	30.4486	30.3906	30.4317	30.4636	30.4859	30.5502	30.3909	30.3862	30.4064
O35643	AP-1 complex subunit beta-1	Ap1b1	0.16602	0.876995	0.0806375	1.05749	0.519006	0.975888	0.0474763	1.03346	0.624741	0.962593	-0.0331612	0.977277	0.628735	0.928224	0.0501814	1.0354	0.0705487	0.992293	0.146649	1.107	0.565924	0.966136	0.0579262	1.04097	0.407439	0.975006	-0.0887229	0.940355	0.193507	0.886003	0.101441	1.07284	0.786593	1	-0.0374635	0.974367	30.6504	30.6781	30.7707	30.8078	30.7255	30.6885	30.6896	30.595	30.5319	30.57	30.7436
B1AWN6	Sodium channel protein type 2 subunit alpha	Scn2a	0.465141	0.953098	-0.0361783	0.975235	0.0643008	0.91527	-0.102542	0.93139	0.231988	0.922259	-0.0663639	0.955042	0.463269	0.87479	-0.0918341	0.938329	0.469313	1	-0.0573133	0.961052	0.065016	0.905601	-0.106697	0.928712	0.528037	0.987099	-0.0493838	0.966349	0.841949	0.990965	-0.0184603	0.987286	0.794415	1	0.02399	1.01677	30.4107	30.3821	30.3896	30.2956	30.3782	30.4109	30.5246	30.299	30.4156	30.3857	30.5872
P05480	Neuronal proto-oncogene tyrosine-protein kinase Src	Src	0.709678	0.952463	-0.0459739	0.968636	0.99	0.999073	-0.00125914	0.999128	0.712729	0.956443	0.0447147	1.03148	0.395847	0.785777	-0.166083	0.891259	0.632764	1	-0.0718428	0.951422	0.203851	0.904414	0.113404	1.08178	0.304327	0.916395	0.185247	1.13701	0.315177	0.821253	-0.216962	0.860375	0.432487	1	0.134368	1.09761	30.3469	30.5955	30.604	30.5722	30.4181	30.4728	30.9257	30.4547	30.6067	30.459	30.764
P51174	Long-chain specific acyl-CoA dehydrogenase, mitochondrial	Acadl	0.548411	0.938099	0.0562488	1.03976	0.151637	0.921067	0.100757	1.07234	0.551136	0.953823	0.044508	1.03133	0.0356167	0.722277	0.140588	1.10235	0.488861	1	0.103734	1.07455	0.370701	0.929649	0.0841885	1.06009	0.877115	1	-0.0195452	0.986544	0.71526	0.976445	0.0591733	1.04187	0.114342	1	-0.10096	0.932412	30.4911	30.6362	30.4376	30.6854	30.5686	30.5151	30.2694	30.6554	30.5232	30.4067	30.3958
Q8CGC7	Bifunctional glutamate/proline--tRNA ligase	Eprs1	0.987149	0.999225	-0.00040617	0.999719	0.0262488	0.897646	0.126095	1.09134	0.0150145	0.815824	0.126501	1.09164	0.249593	0.795625	0.124799	1.09036	0.15729	1	0.0364958	1.02562	0.0238908	0.827377	0.164131	1.12049	0.0591338	0.914562	0.127635	1.0925	0.123899	0.954879	0.0535545	1.03782	0.540132	1	0.0563911	1.03986	30.5765	30.6566	30.6367	30.622	30.6666	30.6444	30.6199	30.565	30.6209	30.4538	30.6076
P70441	Na(+)/H(+) exchange regulatory cofactor NHE-RF1	Slc9a3r1	0.458804	0.941338	0.044134	1.03106	0.0047784	0.874681	0.159663	1.11703	0.039566	0.833849	0.115528	1.08337	0.0189887	0.795787	0.0973606	1.06981	0.662608	1	0.0393575	1.02766	0.0421843	0.829574	0.166998	1.12272	0.190652	0.944639	0.12764	1.09251	0.594002	0.967952	-0.0552759	0.96241	0.646542	1	-0.0249961	0.982823	30.6185	30.6076	30.7531	30.7028	30.5967	30.5897	30.6298	30.7814	30.5342	30.4827	30.509
Q80XI4	Phosphatidylinositol 5-phosphate 4-kinase type-2 beta	Pip4k2b	0.883251	0.986692	-0.00687618	0.995245	0.834286	0.990627	0.018891	1.01318	0.745201	0.975667	0.0257671	1.01802	0.808785	0.973496	0.0207205	1.01447	0.238042	1	0.0584399	1.04134	0.501367	0.938658	0.0875715	1.06258	0.821382	1	0.0291316	1.0204	0.163038	0.912166	0.0831569	1.05933	0.606163	1	0.091568	1.06553	30.3746	30.453	30.5267	30.5288	30.5131	30.5419	30.5118	30.4183	30.403	30.433	30.5806
Q3UTJ2	Sorbin and SH3 domain-containing protein 2	Sorbs2	0.0252569	0.770995	0.171503	1.12623	0.896705	0.991814	-0.0200289	0.986213	0.204166	0.791491	-0.191532	0.875675	0.179293	0.612546	-0.328061	0.796606	0.118124	1	0.0892442	1.06381	0.961731	0.9957	-0.011268	0.99222	0.670576	0.978855	-0.100512	0.932702	0.02724	0.74786	-0.184257	0.880102	0.895887	1	0.0432924	1.03046	30.586	30.5673	30.6053	30.4828	30.2382	30.3184	30.4733	30.412	30.5024	30.4499	30.7628
Q9Z0H4	CUGBP Elav-like family member 2	Celf2	0.293121	0.928123	0.0606703	1.04295	0.31242	0.895229	0.182159	1.13458	0.444712	0.886888	0.121489	1.08786	0.661689	0.915543	0.0598545	1.04236	0.267351	1	0.0613715	1.04346	0.428337	0.89904	0.223949	1.16793	0.559463	0.96967	0.162578	1.11929	0.538642	0.963275	0.0613076	1.04341	0.653186	1	0.164031	1.12041	30.5741	30.4238	30.5168	30.4957	30.3803	30.5771	30.4822	30.4209	30.3491	30.3543	30.4835
Q811D0	Disks large homolog 1	Dlg1	0.0691887	0.819267	0.121278	1.0877	0.745734	0.992048	-0.017114	0.988208	0.0289775	0.802406	-0.138392	0.908531	0.149716	0.760517	-0.136331	0.90983	0.272811	1	0.0911713	1.06523	0.405025	0.969535	-0.0485954	0.966877	0.187153	0.928259	-0.139767	0.907666	0.847119	0.991051	0.0196584	1.01372	0.848784	1	0.0162223	1.01131	30.637	30.4738	30.5021	30.4795	30.3903	30.437	30.3049	30.5348	30.3422	30.4951	30.6049
Q922D8	C-1-tetrahydrofolate synthase, cytoplasmic	Mthfd1	0.173765	0.858537	-0.0909069	0.938932	0.411608	0.939083	-0.111827	0.925415	0.863944	0.98239	-0.0209202	0.985604	0.547112	0.894894	0.0737782	1.05247	0.632081	1	-0.0434806	0.970311	0.535329	0.917794	-0.127533	0.915395	0.696745	0.979881	-0.0840524	0.943404	0.658247	0.978009	0.0497392	1.03508	0.694881	1	-0.108091	0.927815	30.4251	30.5913	30.475	30.5395	30.5997	30.6573	30.4355	30.6993	30.6014	30.6533	30.4561
P35979	60S ribosomal protein L12	Rpl12	0.36379	0.950743	-0.0321371	0.977971	0.569541	0.957067	-0.0919382	0.938261	0.672518	0.94747	-0.0598011	0.959396	0.298638	0.889437	0.0629025	1.04457	0.641752	0.994279	-0.0234693	0.983864	0.514101	0.911484	-0.165073	0.891884	0.572554	0.975321	-0.141603	0.906511	0.94327	1	0.00400352	1.00278	0.545758	1	-0.200502	0.870247	30.5226	30.604	30.5598	30.4888	30.6191	30.5376	30.6375	30.5564	30.5292	30.4959	30.535
Q9D6Z1	Nucleolar protein 56	Nop56	0.585897	0.93142	-0.075319	0.949132	0.706146	0.979964	0.0563182	1.03981	0.434088	0.881108	0.131637	1.09554	0.0734831	0.665063	0.200038	1.14873	0.941688	0.999049	-0.0117912	0.99186	0.732608	0.970109	0.0742455	1.05281	0.746001	0.982317	0.0860367	1.06145	0.228967	0.750798	0.287973	1.22092	0.551585	1	0.173971	1.12816	30.6638	30.4381	30.5265	30.407	30.7293	30.7846	30.6995	30.5122	30.1952	30.6073	30.5065
O88844	Isocitrate dehydrogenase [NADP] cytoplasmic	Idh1	0.215926	0.939602	0.0458569	1.0323	0.000238927	0.536701	0.322711	1.25068	0.000455161	0.560143	0.276854	1.21155	0.0268813	0.473741	0.268534	1.20458	0.039731	1	0.0933247	1.06683	0.00229285	0.511804	0.375725	1.29749	0.0105821	0.785842	0.282401	1.21622	0.150451	0.913476	0.0837332	1.05976	0.286704	1	0.0976003	1.06999	30.8025	30.8655	30.8571	30.8527	30.8727	30.825	30.7963	30.7956	30.7035	30.6184	30.5422
Q99JR1	Sideroflexin-1	Sfxn1	0.0534668	0.772231	0.190342	1.14103	0.982147	0.998658	-0.00241222	0.998329	0.0639277	0.764252	-0.192754	0.874934	0.695963	0.914354	-0.0690212	0.953285	0.164294	0.968744	0.182737	1.13504	0.529416	0.940095	-0.0925058	0.937892	0.063785	0.859442	-0.275243	0.826311	0.901806	1	0.0155547	1.01084	0.261219	1	-0.190667	0.8762	30.6278	30.421	30.55	30.7466	30.2771	30.5336	30.2957	30.4033	30.4703	30.3911	30.5576
Q6PGN3	Serine/threonine-protein kinase DCLK2	Dclk2	0.0599823	0.707021	0.261563	1.19878	0.0566839	0.881714	0.160475	1.11765	0.372231	0.893265	-0.101089	0.932329	0.166986	0.594055	-0.331174	0.794889	0.180086	0.980154	0.180611	1.13336	0.0476291	0.748202	0.232913	1.17521	0.66508	0.991468	0.0523014	1.03692	0.181449	0.742829	-0.275319	0.826267	0.340465	1	0.108156	1.07785	30.6795	30.9098	30.7557	30.7231	30.4751	30.2055	30.5735	30.4757	30.7976	30.5939	30.749
Q9QYB5	Gamma-adducin	Add3	0.206397	0.891091	-0.0756021	0.948946	0.288257	0.965603	0.0609179	1.04313	0.0385236	0.808063	0.13652	1.09925	0.121315	0.758552	0.128522	1.09317	0.894608	0.999288	-0.00880559	0.993915	0.0489189	0.884575	0.133046	1.09661	0.0510739	0.917082	0.141852	1.10332	0.139393	0.85654	0.122538	1.08865	0.0564531	1	0.135868	1.09875	30.535	30.5331	30.6073	30.6781	30.7191	30.7558	30.5951	30.7031	30.5466	30.5631	30.6548
D3YVF0	A-kinase anchor protein 5	Akap5	0.119245	0.806846	0.149892	1.10949	0.732404	0.984286	0.0454755	1.03202	0.365323	0.889461	-0.104417	0.930181	0.820942	0.959763	-0.0392761	0.973143	0.283942	1	0.135265	1.09829	0.945226	0.997022	-0.012579	0.991319	0.441974	0.964814	-0.147844	0.902599	0.4546	0.935418	0.087636	1.06263	0.933033	1	-0.0209316	0.985596	30.5731	30.2255	30.4737	30.4238	30.3137	30.3398	30.1425	30.3954	30.1794	30.214	30.518
Q9QZF2	Glypican-1	Gpc1	0.626767	0.939605	-0.0683265	0.953744	0.71395	0.981198	0.0471154	1.0332	0.479687	0.89619	0.115442	1.08331	0.501166	0.795414	-0.201982	0.869355	0.379241	1	-0.163132	0.893084	0.16435	0.873657	0.163926	1.12033	0.142604	0.859179	0.327058	1.25445	0.290699	0.779833	-0.278958	0.824186	0.301784	1	0.250083	1.18928	30.4873	30.602	30.6	30.4612	30.3375	30.5397	31.0317	30.5243	30.5966	30.414	30.8672
Q62048	Astrocytic phosphoprotein PEA-15	Pea15	0.412439	0.90616	0.0789162	1.05622	0.637005	0.969194	0.072863	1.0518	0.966746	0.993641	-0.00605316	0.995813	0.537518	0.884342	0.0900898	1.06444	0.412722	1	0.123881	1.08966	0.820187	0.98918	0.0537326	1.03795	0.785508	0.994048	-0.0701485	0.95254	0.773565	0.98494	0.0495221	1.03492	0.722225	1	-0.110716	0.926128	30.5847	30.7697	30.7359	30.5502	30.6687	30.5532	30.4264	30.4629	30.7949	30.4133	30.6284
Q3UQ44	Ras GTPase-activating-like protein IQGAP2	Iqgap2	0.348162	0.81443	0.189553	1.14041	0.201536	0.868952	0.273872	1.20905	0.723524	0.946097	0.0843193	1.06019	0.591936	0.847941	-0.150957	0.900653	0.429086	1	0.250539	1.18965	0.0801249	0.543554	0.491709	1.40611	0.530595	0.951782	0.24117	1.18195	0.96443	1	0.0182543	1.01273	0.276601	1	0.410382	1.32904	30.3908	30.6244	30.6487	30.5434	30.2501	30.4964	30.1695	29.9841	30.9114	30.7288	30.3196
O35215	D-dopachrome decarboxylase	Ddt	0.556917	0.951846	0.0306471	1.02147	0.648897	0.993087	0.024822	1.01735	0.919015	0.990673	-0.00582504	0.995971	0.590113	0.897427	0.0690851	1.04905	0.760721	1	0.0214322	1.01497	0.46939	0.982622	-0.0343329	0.976483	0.408195	0.982435	-0.0557652	0.962084	0.922951	1	0.00938543	1.00653	0.189637	1	-0.115465	0.923085	30.5322	30.5458	30.4714	30.4238	30.3963	30.5403	30.4029	30.5696	30.4043	30.3178	30.4807
P63321	Ras-related protein Ral-A	Rala	0.818949	0.985432	-0.0118266	0.991836	0.6953	0.987905	-0.0308692	0.97883	0.764465	0.978606	-0.0190426	0.986887	0.107053	0.794527	-0.108278	0.927695	0.764489	1	-0.0214596	0.985235	0.809221	0.993917	0.0189883	1.01325	0.567655	0.995334	0.0404479	1.02843	0.464841	0.97521	0.0443624	1.03123	0.072817	1	0.193089	1.14321	30.6283	30.4215	30.5298	30.605	30.5968	30.5724	30.5356	30.6126	30.4725	30.7295	30.6563
P84104	Serine/arginine-rich splicing factor 3	Srsf3	0.41257	0.8354	-0.150489	0.900945	0.142409	0.903142	0.135501	1.09847	0.100392	0.691158	0.28599	1.21925	0.351105	0.654037	0.466312	1.38157	0.362376	1	-0.093598	0.937183	0.4431	0.949285	0.0721766	1.0513	0.218039	0.91093	0.165775	1.12177	0.408505	0.82152	0.28544	1.21878	0.912139	1	-0.0150976	0.98959	30.742	30.4436	30.5657	30.5292	30.5195	31.2642	30.7522	30.4626	30.6045	30.3214	30.5297
P12367	cAMP-dependent protein kinase type II-alpha regulatory subunit	Prkar2a	0.348237	0.933227	-0.0551564	0.96249	0.525056	0.984408	-0.0343526	0.97647	0.735327	0.976091	0.0208038	1.01452	0.926167	0.985705	-0.010725	0.992594	0.483549	1	-0.0625254	0.957586	0.74629	0.989398	-0.0207024	0.985753	0.660795	0.995843	0.0418231	1.02941	0.663519	0.980833	-0.0477333	0.967455	0.962711	0.999064	0.00481478	1.00334	30.3665	30.349	30.4649	30.4263	30.3894	30.467	30.5618	30.5364	30.3296	30.3441	30.5337
P10605	Cathepsin B	Ctsb	0.388584	0.927433	-0.065084	0.95589	0.371974	0.920143	0.13727	1.09982	0.155258	0.777778	0.202354	1.15057	0.0551782	0.429979	0.346545	1.27151	0.715284	1	-0.0420284	0.971288	0.774205	0.979846	0.0641988	1.0455	0.640422	0.978999	0.106227	1.07641	0.77112	0.991016	0.0346851	1.02433	0.482058	1	-0.205633	0.867158	30.7607	30.6508	30.8547	30.8869	30.9309	30.8174	30.9051	30.9289	30.6845	30.5909	30.4644
Q8CFX3	Protocadherin 1	Pcdh1	0.254443	0.837289	0.125536	1.09091	0.357739	0.918355	0.117945	1.08519	0.95203	0.991153	-0.00759048	0.994752	0.0521173	0.648277	-0.200071	0.870508	0.617074	1	0.0842889	1.06017	0.217046	0.841109	0.205019	1.1527	0.541189	0.977399	0.12073	1.08728	0.848354	0.992279	-0.0373453	0.974446	0.162735	1	0.283456	1.21711	30.6349	30.4217	30.6727	30.4945	30.3657	30.4503	30.6776	30.2042	30.4542	30.5864	30.6298
Q9DBP5	UMP-CMP kinase	Cmpk1	0.358007	0.939346	-0.0490107	0.966599	0.578019	0.992302	-0.0247515	0.98299	0.576492	0.974158	0.0242592	1.01696	0.290426	0.851492	0.0874023	1.06246	0.741674	0.995126	-0.0265077	0.981794	0.467411	0.975127	-0.0443439	0.969731	0.774626	1	-0.0178363	0.987713	0.445599	0.956683	0.062012	1.04392	0.468654	1	-0.0432266	0.970482	30.4583	30.5258	30.3513	30.47	30.5286	30.5466	30.3792	30.5682	30.4793	30.3895	30.5109
Q78PY7	Staphylococcal nuclease domain-containing protein 1	Snd1	0.0741786	0.834836	-0.0997256	0.93321	0.585666	0.973133	-0.0536391	0.963503	0.599499	0.952325	0.0460865	1.03246	0.980553	0.996221	0.00290775	1.00202	0.143298	1	-0.088377	0.94058	0.922668	0.992559	-0.0135047	0.990683	0.618019	0.979966	0.0748723	1.05327	0.444633	0.959691	-0.0584927	0.960267	0.946229	1	0.0134719	1.00938	30.428	30.5522	30.586	30.5628	30.5623	30.6315	30.5608	30.7121	30.6932	30.6939	30.4941
P62301	40S ribosomal protein S13	Rps13	0.00471741	0.592604	-0.27126	0.828596	0.336464	0.902746	-0.163901	0.892608	0.484992	0.907977	0.107359	1.07725	0.698394	0.901934	0.0851593	1.0608	0.0179797	0.890464	-0.284187	0.821204	0.537644	0.910432	-0.162028	0.893768	0.640561	0.980452	0.122159	1.08836	0.625804	0.96467	-0.0628656	0.957361	0.941251	1	-0.0258656	0.982231	30.499	30.6336	30.4673	30.5426	30.8917	30.6466	30.8409	30.9234	30.7317	30.8296	30.5383
B0V2N1	Receptor-type tyrosine-protein phosphatase S	Ptprs	0.913234	0.987095	-0.0100049	0.993089	0.0988084	0.885241	0.182663	1.13498	0.111397	0.776574	0.192668	1.14288	0.177624	0.749946	0.146953	1.10723	0.757102	1	0.0421079	1.02962	0.0993562	0.749273	0.265252	1.20185	0.238783	0.897303	0.223145	1.16728	0.488464	0.913027	0.122613	1.08871	0.272631	1	0.198805	1.14775	30.5458	30.4532	30.6175	30.6036	30.6974	30.5798	30.7242	30.3243	30.4994	30.4502	30.5331
Q9R1P4	Proteasome subunit alpha type-1	Psma1	0.725133	0.979199	0.0133649	1.00931	0.0174618	0.784887	0.24343	1.1838	0.00861913	0.655787	0.230066	1.17289	0.101281	0.681604	0.199704	1.14846	0.138869	1	0.0617498	1.04373	0.0416227	0.626189	0.312056	1.24148	0.0709948	0.877027	0.250306	1.18946	0.175888	0.958034	0.0527074	1.03721	0.510477	1	0.10331	1.07423	30.5298	30.5806	30.6759	30.6606	30.6005	30.6594	30.5835	30.6008	30.5475	30.368	30.4926
P35980	60S ribosomal protein L18	Rpl18	0.752598	0.964678	0.0220439	1.0154	0.295606	0.916538	0.128261	1.09298	0.321704	0.885102	0.106217	1.0764	0.22203	0.737513	0.165551	1.12159	0.862203	0.999262	0.0161482	1.01126	0.65721	0.962149	0.0828088	1.05908	0.718634	0.987996	0.0666606	1.04729	0.570227	0.963956	0.0597671	1.0423	0.866365	1	-0.0391235	0.973246	30.8706	30.869	30.6553	30.7297	30.8645	30.7254	30.6809	30.6682	30.8565	30.6935	30.5654
Q9CR57	60S ribosomal protein L14	Rpl14	0.185011	0.821125	-0.139378	0.907911	0.27676	0.898825	-0.1806	0.882336	0.794928	0.967425	-0.0412228	0.971831	0.760706	0.931849	-0.0615664	0.958223	0.149896	0.971883	-0.200317	0.870359	0.385921	0.891992	-0.227978	0.853831	0.916985	1	-0.0276604	0.98101	0.471214	0.8939	-0.137203	0.90928	0.757188	1	-0.103297	0.930903	30.504	30.5458	30.376	30.5175	30.6855	30.4002	30.7207	30.8287	30.4909	30.7086	30.5003
Q9CZY3	Ubiquitin-conjugating enzyme E2 variant 1	Ube2v1	0.342019	0.940036	-0.0435126	0.97029	0.319896	0.972364	-0.054423	0.962979	0.833349	0.989778	-0.0109104	0.992466	0.942732	0.990568	-0.00533867	0.996306	0.568295	1	-0.0373497	0.974443	0.548599	0.970102	-0.0519746	0.964615	0.869187	1	-0.0146249	0.989914	0.927759	1	0.00719261	1.005	0.983446	1	-0.00209363	0.99855	30.2494	30.3168	30.2832	30.1878	30.2503	30.3639	30.3424	30.2078	30.3495	30.2792	30.3457
Q8R1Q8	Cytoplasmic dynein 1 light intermediate chain 1	Dync1li1	0.966614	0.995181	0.00234652	1.00163	0.275297	0.973951	-0.054317	0.96305	0.198587	0.932391	-0.0566635	0.961485	0.133835	0.940435	0.030467	1.02134	0.477287	1	0.049235	1.03472	0.420598	0.958886	-0.0655155	0.955604	0.0555786	0.932903	-0.114751	0.923542	0.00796008	0.812398	0.132716	1.09636	0.825889	1	-0.0125011	0.991372	30.4726	30.4103	30.5671	30.3659	30.5208	30.5417	30.3733	30.3969	30.4254	30.5076	30.494
P60487	Pyridoxal phosphate phosphatase	Pdxp	0.223755	0.928496	-0.0583608	0.960355	0.196052	0.942063	-0.0858144	0.942252	0.670253	0.972388	-0.0274536	0.981151	0.248896	0.816117	0.110762	1.0798	0.986793	1	0.000673294	1.00047	0.185888	0.901915	-0.118924	0.920874	0.196001	0.948148	-0.119597	0.920445	0.0693356	0.854879	0.123454	1.08934	0.374877	1	-0.106904	0.928578	30.3875	30.4333	30.4621	30.383	30.5209	30.5769	30.476	30.4295	30.3708	30.501	30.3752
P09103	Protein disulfide-isomerase	P4hb	0.224191	0.902877	-0.0705594	0.952269	0.480097	0.969932	0.0538848	1.03806	0.111325	0.830719	0.124444	1.09009	0.00719206	0.643231	0.187265	1.1386	0.735705	0.994447	-0.0262388	0.981977	0.617173	0.969923	0.0563246	1.03981	0.53525	0.979288	0.0825634	1.0589	0.698349	0.984929	0.0375312	1.02636	0.64346	1	-0.0671708	0.954508	30.4793	30.6405	30.5543	30.5949	30.6646	30.6561	30.522	30.7525	30.594	30.4577	30.4885
Q9EQZ6	Rap guanine nucleotide exchange factor 4	Rapgef4	0.0663305	0.615377	0.342471	1.26793	0.953521	0.996212	-0.00778475	0.994619	0.067907	0.606535	-0.350256	0.784445	0.118859	0.356068	-0.692365	0.618839	0.240241	1	0.151428	1.11067	0.861321	0.988756	0.0292447	1.02048	0.448146	0.969995	-0.122183	0.918796	0.0360953	0.707477	-0.480068	0.716944	0.728886	1	0.0901136	1.06445	30.5335	30.635	30.6161	30.3613	30.0427	29.7692	30.5064	30.2812	30.3706	30.374	30.8227
P28474	Alcohol dehydrogenase class-3	Adh5	0.985678	0.998956	-0.000843048	0.999416	0.634076	0.992947	0.0201672	1.01408	0.644373	0.976998	0.0210102	1.01467	0.43499	0.894802	-0.0618849	0.958012	0.907368	0.9986	0.00668017	1.00464	0.0367128	0.911447	0.0829538	1.05918	0.225925	0.97549	0.0762736	1.05429	0.610668	0.981728	-0.0424608	0.970997	0.0828374	1	0.0956977	1.06858	30.4304	30.5184	30.5003	30.5667	30.4286	30.53	30.4902	30.62	30.4551	30.5801	30.5023
Q6URW6	Myosin-14	Myh14	0.406136	0.891096	-0.0897532	0.939684	0.474741	0.947631	-0.0934622	0.937271	0.972793	0.993556	-0.00370903	0.997432	0.753188	0.935663	-0.0539026	0.963327	0.301363	1	-0.143991	0.905012	0.559698	0.929053	-0.114237	0.92387	0.842719	1	0.0297534	1.02084	0.115121	0.779292	-0.192769	0.874925	0.613399	1	-0.109113	0.927158	30.259	30.3866	30.1325	30.5324	30.1991	30.4044	30.5587	30.4489	30.4758	30.4645	30.2467
A2AJA9	Apical junction component 1 homolog	Ajm1	0.190341	0.833499	0.119727	1.08653	0.894518	0.991341	0.0213995	1.01494	0.512917	0.910846	-0.0983273	0.934115	0.241218	0.683206	-0.27116	0.828653	0.787152	0.994005	0.0281544	1.01971	0.85285	0.991836	0.045049	1.03172	0.943602	0.99816	0.0168947	1.01178	0.0998464	0.769392	-0.195769	0.873107	0.780895	1	0.0922855	1.06606	30.4484	30.5331	30.3744	30.2784	30.1925	30.1503	30.4919	30.2869	30.3226	30.2793	30.6058
P41105	60S ribosomal protein L28	Rpl28	0.215464	0.838963	0.117083	1.08454	0.947815	0.996776	0.00943947	1.00656	0.393146	0.889252	-0.107644	0.928103	0.0563711	0.660149	-0.195924	0.873014	0.817752	0.997976	0.0265013	1.01854	0.924683	0.993609	-0.0222893	0.984669	0.820898	0.99904	-0.0487906	0.966746	0.0749849	0.785037	-0.169969	0.888862	0.934379	1	-0.0228357	0.984296	30.7079	30.8169	30.5256	30.5101	30.469	30.3732	30.6682	30.5307	30.5742	30.6088	30.6251
P49615	Cyclin-dependent-like kinase 5	Cdk5	0.0379783	0.78572	-0.153167	0.899274	0.00761691	0.923034	-0.0850835	0.94273	0.249633	0.923428	0.068084	1.04832	0.0800207	0.771815	0.112192	1.08087	0.210401	1	-0.124821	0.917118	0.0558881	0.908387	-0.0861422	0.942038	0.683101	0.998626	0.0386785	1.02717	0.449601	0.933315	0.0949666	1.06804	0.624936	1	0.0214529	1.01498	30.3949	30.3493	30.3393	30.3804	30.6077	30.5445	30.5237	30.5985	30.3212	30.4519	30.476
Q60634	Flotillin-2	Flot2	0.332401	0.938165	0.0441454	1.03107	0.541476	0.990726	0.0214724	1.01499	0.556401	0.975229	-0.022673	0.984407	0.87739	0.983282	0.0148096	1.01032	0.448288	1	0.0446383	1.03142	0.942879	0.997591	-0.00302315	0.997907	0.317956	0.982516	-0.0476615	0.967503	0.746818	0.98875	0.0251369	1.01758	0.450434	1	-0.0373341	0.974454	30.4767	30.441	30.5002	30.3742	30.3513	30.4866	30.4701	30.3673	30.344	30.3531	30.4552
Q4KUS2	Protein unc-13 homolog A	Unc13a	0.703364	0.940261	0.0638056	1.04522	0.940547	0.996233	-0.011241	0.992239	0.673677	0.943823	-0.0750465	0.949311	0.224254	0.565434	-0.441546	0.736345	0.794457	1	-0.0517928	0.964737	0.523588	0.922007	0.117494	1.08485	0.441602	0.951432	0.169287	1.1245	0.340945	0.790592	-0.287097	0.819549	0.190082	1	0.323736	1.25157	30.7687	30.8145	30.9244	30.5581	30.7493	30.3115	31.083	30.5599	30.8095	30.8431	31.1007
O35381	Acidic leucine-rich nuclear phosphoprotein 32 family member A	Anp32a	0.223096	0.835769	0.114742	1.08278	0.181404	0.900609	0.129733	1.09409	0.836373	0.985743	0.014991	1.01045	0.945825	0.984824	-0.0119972	0.991719	0.410014	1	0.100405	1.07207	0.308377	0.905748	0.133389	1.09687	0.678971	0.998131	0.0329831	1.02313	0.367444	0.910667	-0.103447	0.930807	0.645518	1	-0.0584663	0.960284	30.5055	30.7706	30.6393	30.4311	30.3064	30.5132	30.4567	30.6055	30.4776	30.3045	30.5391
Q8R570	Synaptosomal-associated protein 47	Snap47	0.284129	0.894101	0.078254	1.05574	0.51116	0.964492	0.0776383	1.05529	0.994776	1	-0.000615692	0.999573	0.365245	0.884061	0.0698566	1.04961	0.372859	1	0.0993608	1.0713	0.766533	0.98217	0.0517635	1.03653	0.768304	0.998729	-0.0475972	0.967546	0.830515	0.991318	-0.0175066	0.987939	0.519261	1	-0.13496	0.910695	30.5691	30.8018	30.7189	30.5239	30.533	30.5964	30.4939	30.569	30.6836	30.5459	30.4437
O88998	Noelin	Olfm1	0.879529	0.97645	-0.0222026	0.984728	0.584459	0.946188	-0.134929	0.910715	0.652125	0.924714	-0.112726	0.924839	0.347095	0.654336	-0.461257	0.726353	0.267868	0.996329	-0.175225	0.885629	0.862966	0.9911	-0.0555973	0.962196	0.733967	0.975993	0.119628	1.08645	0.122665	0.67718	-0.390599	0.762813	0.715504	1	0.190286	1.14099	30.2058	30.2286	30.1579	30.2696	29.9147	30.0919	30.6257	30.1675	30.3886	30.0967	30.8324
Q8BJ42	Disks large-associated protein 2	Dlgap2	0.0398308	0.681537	0.273315	1.20858	0.357854	0.886769	0.321182	1.24935	0.871369	0.97436	0.0478668	1.03374	0.182038	0.482847	-0.47202	0.720954	0.262363	1	0.135887	1.09877	0.265591	0.727967	0.530345	1.44427	0.377765	0.893393	0.394458	1.31445	0.127726	0.775369	-0.202161	0.869247	0.30193	1	0.664317	1.58482	31.0966	30.9194	31.0166	30.6751	30.6556	30.409	30.7806	30.7179	30.7049	30.8046	31.2041
Q91X97	Neurocalcin-delta	Ncald	0.643846	0.939595	0.0621103	1.04399	0.602902	0.968138	0.0675505	1.04794	0.963949	0.99401	0.00544014	1.00378	0.0740264	0.607687	-0.247775	0.842194	0.787226	0.997803	-0.0438849	0.970039	0.53	0.914437	0.130365	1.09457	0.31097	0.922479	0.17425	1.12838	0.0577237	0.680419	-0.301093	0.811637	0.538029	1	0.120932	1.08744	30.515	30.4989	30.835	30.3845	30.2555	30.3757	30.6611	30.7087	30.4802	30.602	30.5247
Q6ZWN5	40S ribosomal protein S9	Rps9	0.702542	0.952311	-0.0384154	0.973724	0.453788	0.942509	0.115992	1.08372	0.325868	0.843369	0.154408	1.11296	0.545358	0.862562	0.115429	1.0833	0.529778	1	-0.0816294	0.94499	0.695715	0.960787	0.0987638	1.07086	0.511137	0.964888	0.180393	1.13319	0.68639	0.96449	-0.0799322	0.946102	0.962603	1	-0.0149679	0.989679	30.8086	30.8011	30.8388	30.6511	30.9252	30.6055	30.9857	30.9081	30.642	30.6535	30.6463
Q9QUM9	Proteasome subunit alpha type-6	Psma6	0.314136	0.939512	-0.0470583	0.967908	0.172199	0.966231	0.0586012	1.04146	0.0115376	0.834602	0.105659	1.07599	0.0955507	0.755288	0.129801	1.09414	0.510591	0.995447	0.0210107	1.01467	0.0245035	0.899434	0.110576	1.07966	0.034868	0.963977	0.0895653	1.06405	0.0772663	0.890319	0.0890808	1.06369	0.263153	1	0.0488453	1.03444	30.3246	30.4961	30.4486	30.4184	30.4904	30.5545	30.4547	30.4485	30.3968	30.3636	30.4217
Q9D0J8	Parathymosin	Ptms	0.94808	0.98691	0.0108358	1.00754	0.8087	0.973423	0.127331	1.09227	0.797375	0.948723	0.116495	1.0841	0.547596	0.722279	0.757711	1.69081	0.0250938	0.971937	-0.163914	0.8926	0.0110728	0.540712	-0.474897	0.719518	0.0538408	0.844063	-0.310983	0.806092	0.759509	0.97922	-0.0629756	0.957288	0.242134	1	-1.13167	0.456387	30.4414	29.8627	29.8443	29.8226	30.1835	29.7048	29.9837	30.095	29.9427	30.2151	28.1577
P43277	Histone H1.3	H1-3	0.182357	0.627462	-0.526346	0.694311	0.788016	0.973657	0.0988714	1.07094	0.14851	0.5872	0.625217	1.54244	0.151199	0.360826	0.83157	1.77962	0.401783	0.966822	-0.426067	0.744288	0.904254	0.988605	0.0615819	1.04361	0.4715	0.903512	0.487649	1.40216	0.350384	0.72221	0.608393	1.52456	0.703541	1	0.264472	1.2012	30.2129	29.9349	29.6559	29.331	30.5398	30.8103	30.3275	30.6275	29.245	30.1839	29.5031
O54829	Regulator of G-protein signaling 7	Rgs7	0.496581	0.951986	-0.0314536	0.978434	0.0411811	0.823768	-0.236291	0.848925	0.0304231	0.710309	-0.204837	0.867637	0.188073	0.713095	-0.202561	0.869006	0.884325	0.999896	-0.00969823	0.9933	0.19694	0.825597	-0.216052	0.860918	0.185858	0.894022	-0.206354	0.866725	0.804472	1	0.0110928	1.00772	0.970055	1	0.00730006	1.00507	30.2743	30.2911	30.4592	30.2804	30.3276	30.4011	30.3609	30.309	30.39	30.6631	30.4707
Q91ZJ5	UTP--glucose-1-phosphate uridylyltransferase	Ugp2	0.143343	0.867682	-0.0828355	0.9442	0.519945	0.986024	0.0322577	1.02261	0.0579158	0.832484	0.115093	1.08305	0.69859	0.964111	0.0237913	1.01663	0.110609	1	-0.134129	0.91122	0.377451	0.97447	0.041832	1.02942	0.0795275	0.893039	0.175961	1.12972	0.52149	0.963007	-0.0600335	0.959242	0.24727	1	0.0921364	1.06595	30.4458	30.3109	30.3375	30.3616	30.4201	30.4014	30.4742	30.5799	30.3583	30.4394	30.3346
Q61206	Platelet-activating factor acetylhydrolase IB subunit beta	Pafah1b2	0.571533	0.939616	0.0538962	1.03806	0.971277	0.996899	0.00349989	1.00243	0.514179	0.948822	-0.0503963	0.965671	0.758245	0.953051	-0.0390644	0.973286	0.989546	1	-0.00185331	0.998716	0.646857	0.970665	-0.0598043	0.959394	0.507276	0.979499	-0.057951	0.960628	0.253014	0.868074	-0.129239	0.914314	0.216756	1	-0.148126	0.902422	30.3954	30.1585	30.5384	30.4407	30.2202	30.2834	30.3825	30.4991	30.2616	30.3971	30.1846
Q925I1	ATPase family AAA domain-containing protein 3	Atad3	0.852719	0.984376	-0.0136786	0.990563	0.650652	0.987926	-0.0317576	0.978228	0.810028	0.982033	-0.018079	0.987547	0.0833005	0.723592	0.14649	1.10687	0.0891984	1	0.103242	1.07418	0.773796	0.990157	-0.0245501	0.983127	0.236453	0.95444	-0.127792	0.915231	0.0620462	0.757006	0.18741	1.13872	0.468946	1	-0.0868715	0.941562	30.1923	30.3544	30.3723	30.3535	30.4786	30.4099	30.1882	30.3437	30.2385	30.3271	30.2684
P18572	Basigin	Bsg	0.0231127	0.802678	-0.135557	0.910318	0.772434	0.992753	-0.0177801	0.987751	0.101772	0.843314	0.117777	1.08506	0.479403	0.844912	0.117434	1.0848	0.00574538	0.970668	-0.144993	0.904384	0.767034	0.989893	-0.0269871	0.981468	0.240362	0.958472	0.118006	1.08523	0.947933	1	0.0065155	1.00453	0.95614	1	0.00708771	1.00492	30.3787	30.3154	30.3102	30.3659	30.6002	30.3638	30.437	30.5055	30.4839	30.4322	30.2969
Q6PB66	Leucine-rich PPR motif-containing protein, mitochondrial	Lrpprc	0.905146	0.987402	-0.00511513	0.996461	0.36925	0.947387	-0.0896885	0.939726	0.357321	0.908565	-0.0845734	0.943063	0.835124	0.985307	-0.0105762	0.992696	0.186415	1	0.0558484	1.03947	0.621442	0.962398	-0.0780563	0.947333	0.419698	0.962836	-0.133905	0.911361	0.127859	0.88365	0.100276	1.07198	0.910761	1	-0.0230522	0.984148	30.3229	30.4309	30.3845	30.4035	30.4824	30.4191	30.3403	30.4109	30.3002	30.493	30.4297
Q9D1A2	Cytosolic non-specific dipeptidase	Cndp2	0.226626	0.927182	0.0583276	1.04126	0.124649	0.901062	0.123388	1.08929	0.295037	0.925783	0.06506	1.04613	0.691037	0.957259	0.0310059	1.02172	0.131066	1	0.0832342	1.05939	0.172821	0.873006	0.170997	1.12584	0.413851	0.976484	0.0877628	1.06272	0.842167	1	-0.0112623	0.992224	0.737479	1	0.0454947	1.03204	30.379	30.5667	30.497	30.4261	30.3388	30.4654	30.3943	30.4469	30.399	30.3946	30.3476
Q5SSL4	Active breakpoint cluster region-related protein	Abr	0.39889	0.939264	-0.0446733	0.969509	0.850802	0.992663	-0.0112692	0.992219	0.531281	0.962384	0.0334042	1.02342	0.882142	0.985831	0.0116796	1.00813	0.125475	1	-0.0893396	0.939953	0.621191	0.980544	-0.0414524	0.971676	0.596128	0.991631	0.0478872	1.03375	0.78168	0.989477	-0.0218954	0.984938	0.889845	1	0.0143121	1.00997	30.3437	30.1513	30.2187	30.2302	30.1982	30.3368	30.3352	30.3215	30.2115	30.2494	30.2623
Q921I1	Serotransferrin	Tf	0.174227	0.758276	-0.266639	0.831254	0.492984	0.919449	-0.176995	0.884544	0.736401	0.946723	0.0896446	1.06411	0.879108	0.965295	-0.0382872	0.97381	0.1522	0.925677	-0.400825	0.757425	0.588714	0.90932	-0.225892	0.855066	0.712883	0.97793	0.174932	1.12891	0.586323	0.892222	-0.199859	0.870636	0.980196	1	0.013361	1.0093	30.6289	30.4459	30.3271	30.4628	30.3994	30.8264	30.5547	30.6268	31.2567	30.7131	30.5892
P14131	40S ribosomal protein S16	Rps16	0.0242061	0.70496	-0.23667	0.848702	0.432574	0.920851	-0.140184	0.907404	0.566918	0.92343	0.0964859	1.06917	0.707067	0.959262	0.0293016	1.02052	0.0200918	0.906807	-0.30518	0.809341	0.565566	0.90991	-0.163905	0.892606	0.628515	0.974855	0.141275	1.10288	0.102272	0.745684	-0.224198	0.856071	0.762282	1	-0.112224	0.925161	30.3843	30.4995	30.4	30.5075	30.5322	30.5677	30.8492	30.8469	30.6264	30.5859	30.4554
P63216	Guanine nucleotide-binding protein G(I)/G(S)/G(O) subunit gamma-3	Gng3	0.091922	0.839056	0.0948575	1.06796	0.572531	0.953285	0.102111	1.07334	0.963454	0.991838	0.00725365	1.00504	0.230452	0.757889	-0.145454	0.904095	0.129422	1	0.086956	1.06213	0.444719	0.899618	0.196015	1.14553	0.666567	0.978922	0.109059	1.07852	0.437738	0.956633	0.0624955	1.04427	0.370713	1	0.317009	1.24575	30.4891	30.3814	30.3287	30.3624	30.2758	30.3904	30.2352	30.3561	30.2204	30.4153	30.5418
Q91ZX7	Prolow-density lipoprotein receptor-related protein 1	Lrp1	0.941377	0.991438	-0.0038722	0.99732	0.0534501	0.901378	0.119089	1.08605	0.00118473	0.8038	0.122961	1.08897	0.199183	0.843562	0.087306	1.06238	0.910492	0.999372	-0.00956154	0.993394	0.14799	0.897903	0.13717	1.09975	0.0102076	0.894007	0.146732	1.10706	0.434792	0.985229	-0.0321703	0.977948	0.546547	1	0.0272554	1.01907	30.4333	30.4408	30.3441	30.6011	30.4408	30.4381	30.4283	30.5232	30.4632	30.306	30.3983
Q7TME0	Phospholipid phosphatase-related protein type 4	Plppr4	0.575271	0.941609	0.0496143	1.03499	0.817387	0.989324	0.0403923	1.02839	0.95659	0.989681	-0.00922203	0.993628	0.0533844	0.467881	-0.307546	0.808015	0.724543	1	0.050506	1.03563	0.227157	0.82864	0.240166	1.18113	0.421173	0.940417	0.18966	1.1405	0.854572	0.989276	-0.0337531	0.976876	0.127894	1	0.463453	1.37884	30.2865	30.3214	30.3961	30.3146	30.2626	30.257	30.3754	30.0371	30.4681	30.4933	30.6413
Q9DCT8	Cysteine-rich protein 2	Crip2	0.595932	0.950468	-0.0364211	0.975071	0.53051	0.972954	-0.0503749	0.965685	0.865881	0.986674	-0.0139538	0.990375	0.00411014	0.697922	0.151344	1.1106	0.945833	0.996934	0.00599607	1.00416	0.323939	0.90904	-0.118156	0.921364	0.34886	0.964084	-0.124153	0.917543	0.217021	0.852642	0.139394	1.10144	0.346276	1	-0.136103	0.909974	30.3674	30.2738	30.2628	30.4057	30.457	30.438	30.2001	30.4367	30.2875	30.2941	30.2982
P21278	Guanine nucleotide-binding protein subunit alpha-11	Gna11	0.2618	0.835981	0.121568	1.08792	0.622727	0.984652	-0.0369062	0.974743	0.12769	0.801995	-0.158475	0.895972	0.606731	0.897789	-0.0702438	0.952477	0.468761	1	0.118232	1.0854	0.346531	0.915596	-0.0990632	0.933639	0.204565	0.895053	-0.217295	0.860177	0.969826	1	0.00762272	1.0053	0.202563	1	-0.139429	0.907879	30.3045	30.3105	30.3821	30.1444	30.0621	30.2746	30.0578	30.0054	30.4191	30.1918	30.2855
Q9R0Q7	Prostaglandin E synthase 3	Ptges3	0.28905	0.908466	0.0699487	1.04968	0.0591373	0.903062	0.107132	1.07708	0.579728	0.957042	0.0371834	1.02611	0.606606	0.897714	-0.0730782	0.950608	0.812243	0.997754	-0.0139078	0.990406	0.0243125	0.904672	0.0967833	1.06939	0.107956	0.951309	0.110691	1.07975	0.0810775	0.782158	-0.174383	0.886147	0.924718	1	0.0093867	1.00653	30.5118	30.4681	30.4838	30.4144	30.2733	30.3166	30.5395	30.4975	30.371	30.2492	30.4868
Q9QYJ0	DnaJ homolog subfamily A member 2	Dnaja2	0.0719904	0.84675	0.0897383	1.06418	0.712724	0.987367	0.0319773	1.02241	0.462681	0.941707	-0.057761	0.960754	0.123958	0.822244	-0.0941525	0.936822	0.339789	1	0.0711009	1.05052	0.790244	0.99205	0.0376008	1.02641	0.814379	1	-0.0335	0.977047	0.586722	0.982295	-0.0381559	0.973899	0.898932	1	0.0224965	1.01572	30.5164	30.5089	30.5767	30.4232	30.384	30.4033	30.5263	30.3664	30.4028	30.4525	30.5232
Q8C854	Myelin expression factor 2	Myef2	0.515126	0.964851	0.0187977	1.01311	0.67006	0.988675	-0.0294136	0.979818	0.448724	0.948558	-0.0482113	0.967135	0.447115	0.886126	0.076355	1.05435	0.261037	1	0.0317796	1.02227	0.228437	0.91037	-0.0994759	0.933372	0.128166	0.927335	-0.131255	0.913037	0.240773	0.956975	0.0540126	1.03815	0.224688	1	-0.153598	0.899006	30.3479	30.335	30.2738	30.3316	30.3791	30.2923	30.3089	30.2625	30.2736	30.3282	30.1905
P16460	Argininosuccinate synthase	Ass1	0.319038	0.825476	-0.152264	0.899837	0.149454	0.885876	-0.198908	0.871209	0.773012	0.962808	-0.0466446	0.968186	0.637248	0.884401	0.104915	1.07543	0.437887	1	-0.183738	0.880419	0.0550385	0.626498	-0.331422	0.794753	0.579242	0.972948	-0.147684	0.902698	0.892966	0.990028	0.040925	1.02877	0.377694	1	-0.211674	0.863535	30.4031	30.2115	30.2457	30.1781	30.5094	30.3635	30.1454	30.8183	30.2229	30.5076	30.1554
Q91WQ3	Tyrosine--tRNA ligase, cytoplasmic	Yars1	0.992362	0.999195	0.000751686	1.00052	0.134145	0.939691	0.0850847	1.06075	0.30569	0.907263	0.084333	1.0602	0.69244	0.909138	0.076829	1.0547	0.699816	0.999666	-0.0317637	0.978224	0.425898	0.961965	0.057572	1.04071	0.387416	0.976156	0.0893358	1.06388	0.646824	0.959812	-0.0745691	0.949626	0.543736	1	-0.0620623	0.957894	30.4077	30.3428	30.4382	30.4099	30.2003	30.508	30.5094	30.4901	30.2867	30.2096	30.3451
Q9CR61	NADH dehydrogenase [ubiquinone] 1 beta subcomplex subunit 7	Ndufb7	0.0426928	0.806992	0.131386	1.09535	0.0337517	0.884931	0.15664	1.11469	0.59878	0.973679	0.0252537	1.01766	0.087119	0.810766	0.097414	1.06985	0.0774319	0.96846	0.177767	1.13113	0.156415	0.885805	0.154914	1.11335	0.767901	1	-0.0228532	0.984284	0.230715	0.932701	0.0748618	1.05326	0.619235	1	-0.0454054	0.969017	30.5309	30.4778	30.6125	30.6997	30.4925	30.4951	30.4952	30.3914	30.37	30.3656	30.4271
Q6ZWY8	Thymosin beta-10	Tmsb10	0.771614	0.952595	-0.055477	0.962276	0.219298	0.895646	-0.156957	0.896915	0.567392	0.919499	-0.10148	0.932076	0.280869	0.72204	0.210375	1.15699	0.963439	0.998629	0.0126394	1.0088	0.0631984	0.676267	-0.296745	0.814087	0.283282	0.88809	-0.309384	0.806986	0.433952	0.834649	0.281732	1.21565	0.171959	1	-0.238027	0.847904	30.19	29.8818	29.9552	30.1981	30.2374	30.3242	29.6874	30.4731	29.8368	29.9334	30.2075
Q8VHW2	Voltage-dependent calcium channel gamma-8 subunit	Cacng8	0.996416	0.999869	0.000325489	1.00023	0.413638	0.903884	0.17247	1.12699	0.367151	0.837137	0.172144	1.12673	0.0354571	0.757432	-0.112851	0.924759	0.894509	0.996298	-0.0155926	0.98925	0.246371	0.791247	0.346549	1.27152	0.245098	0.880437	0.362141	1.28533	0.729067	0.982844	-0.0463394	0.96839	0.274689	1	0.428653	1.34598	30.2955	30.2182	30.4146	30.285	30.2866	30.2638	30.4394	30.1354	30.3899	30.3694	30.4067
Q569Z6	Thyroid hormone receptor-associated protein 3	Thrap3	0.00898574	0.570647	0.329002	1.25614	0.496091	0.966165	0.0727853	1.05175	0.0537967	0.681312	-0.256216	0.837281	0.0833425	0.391646	-0.442423	0.735898	0.0351381	0.956506	0.184072	1.13609	0.723054	0.980421	0.0519931	1.0367	0.412862	0.962165	-0.132079	0.912516	0.0356453	0.675543	-0.278848	0.824249	0.88394	1	0.0314957	1.02207	30.5044	30.3663	30.4157	30.3304	29.9527	29.8631	30.0825	30.2194	30.2583	30.2215	30.4791
Q6PHN9	Ras-related protein Rab-35	Rab35	0.571828	0.935754	-0.0652758	0.955763	0.95512	0.995218	-0.00622692	0.995693	0.265106	0.932076	0.0590488	1.04178	0.88066	0.985611	0.00800037	1.00556	0.280052	1	-0.159255	0.895488	0.59104	0.963236	-0.0661736	0.955168	0.309048	0.973295	0.0930812	1.06665	0.854663	0.993413	-0.0180492	0.987567	0.350693	1	0.0670315	1.04756	30.5513	29.9927	30.2866	30.3336	30.339	30.3519	30.5029	30.2826	30.3051	30.3841	30.2909
Q60676	Serine/threonine-protein phosphatase 5	Ppp5c	0.080112	0.90539	-0.0633628	0.957031	0.0342081	0.951431	-0.0634925	0.956945	0.996463	0.999531	-0.0001297	0.99991	0.176623	0.930665	0.0363531	1.02552	0.539165	0.994857	-0.022508	0.98452	0.236543	0.966198	-0.0469596	0.967974	0.55206	1	-0.0244516	0.983194	0.11842	0.92874	0.0746771	1.05313	0.731864	1	0.0138725	1.00966	30.1607	30.2373	30.21	30.1667	30.3061	30.2977	30.2128	30.2786	30.1901	30.2483	30.2827
O88485	Cytoplasmic dynein 1 intermediate chain 1	Dync1i1	0.289282	0.892853	-0.0793155	0.946507	0.0607273	0.897762	-0.130067	0.913789	0.371312	0.944215	-0.0507515	0.965433	0.732133	0.974168	-0.0182333	0.987441	0.55869	1	-0.0682367	0.953803	0.189203	0.899552	-0.140667	0.9071	0.469715	0.978345	-0.0724303	0.951035	0.618659	0.969265	0.0552355	1.03903	0.989168	1	0.00103855	1.00072	30.3021	30.1106	30.3522	30.3115	30.3656	30.3975	30.4301	30.3724	30.1764	30.4433	30.3563
Q80U28	MAP kinase-activating death domain protein	Madd	0.0874009	0.903381	-0.0651845	0.955823	0.520828	0.971742	-0.0504823	0.965613	0.829726	0.985924	0.0147022	1.01024	0.508578	0.926581	-0.0454741	0.968971	0.178277	1	-0.0703119	0.952432	0.87886	0.992422	-0.0154921	0.989319	0.607208	0.986195	0.0548197	1.03873	0.509807	0.985012	0.0338071	1.02371	0.365486	1	0.134101	1.09741	30.2795	30.1928	30.2534	30.1685	30.3144	30.3037	30.344	30.23	30.2517	30.2978	30.4112
Q03137	Ephrin type-A receptor 4	Epha4	0.0167767	0.807796	-0.123277	0.9181	0.559049	0.946557	0.121658	1.08798	0.204775	0.764258	0.244935	1.18504	0.155736	0.822329	-0.0968151	0.935095	0.0771757	1	-0.130357	0.913605	0.190684	0.74735	0.342411	1.26787	0.101936	0.799245	0.472768	1.38777	0.521559	0.967656	-0.0508849	0.965344	0.162905	1	0.518698	1.43266	30.3128	30.3847	30.375	30.3379	30.4253	30.4654	30.6023	30.4356	30.4508	30.5036	30.5807
Q8VCT3	Aminopeptidase B	Rnpep	0.414534	0.950327	-0.0325501	0.977691	0.713819	0.995738	0.019493	1.0136	0.340005	0.942486	0.0520432	1.03673	0.42222	0.926822	0.0427074	1.03005	0.722398	0.999607	0.0146077	1.01018	0.273562	0.937509	0.0728747	1.05181	0.367343	0.975792	0.058267	1.04121	0.0620684	0.874555	0.102299	1.07348	0.202686	1	0.117859	1.08512	30.3732	30.4514	30.3621	30.3808	30.4921	30.4795	30.4362	30.3469	30.3674	30.4009	30.4853
Q8C3Q5	Protein shisa-7	Shisa7	0.2331	0.875606	0.0853452	1.06094	0.40941	0.903876	0.202504	1.15069	0.569223	0.908489	0.117159	1.0846	0.122588	0.732508	-0.148651	0.902093	0.538618	1	0.0548032	1.03872	0.302705	0.805302	0.349169	1.27383	0.363779	0.906679	0.294366	1.22635	0.474887	0.982674	0.0358508	1.02516	0.287298	1	0.478868	1.39365	30.5956	30.3558	30.5653	30.327	30.3765	30.4177	30.4249	30.3337	30.3251	30.4921	30.5994
Q64516	Glycerol kinase	Gk	0.772864	0.985424	-0.0111437	0.992306	0.350321	0.971012	0.0474615	1.03344	0.278295	0.932214	0.0586052	1.04146	0.603518	0.935547	-0.039854	0.972753	0.113997	1	-0.0625095	0.957597	0.373262	0.95627	0.0617352	1.04372	0.123599	0.933039	0.124245	1.08994	0.0564569	0.862486	-0.108113	0.927801	0.573184	1	0.0559855	1.03957	30.2808	30.241	30.2207	30.2834	30.2237	30.1819	30.2976	30.3591	30.276	30.3044	30.1808
P13707	Glycerol-3-phosphate dehydrogenase [NAD(+)], cytoplasmic	Gpd1	0.969812	0.994923	-0.00256472	0.998224	0.84086	0.993063	0.0172725	1.01204	0.80128	0.979429	0.0198372	1.01385	0.722232	0.949139	-0.0381641	0.973893	0.696209	1	-0.0404466	0.972354	0.88904	0.992419	0.0180581	1.0126	0.663053	0.988643	0.0585047	1.04139	0.610978	0.969082	-0.0552381	0.962436	0.794387	1	0.0414308	1.02913	30.436	30.4438	30.4323	30.2424	30.3124	30.4038	30.5457	30.3035	30.3907	30.3148	30.4776
Q80Y24	Prickle-like protein 2	Prickle2	0.484927	0.879363	0.105552	1.07591	0.450375	0.920238	0.149602	1.10926	0.825056	0.969943	0.0440498	1.031	0.308297	0.67088	-0.356659	0.780971	0.903351	0.995562	-0.0178947	0.987673	0.265832	0.816205	0.293294	1.22544	0.248492	0.900067	0.311189	1.24073	0.358496	0.82092	-0.246068	0.843191	0.222138	1	0.42178	1.33958	30.678	30.6586	30.6837	30.3915	30.5985	30.101	30.7723	30.4189	30.5962	30.6201	30.7927
Q61696;P17879	Heat shock 70 kDa protein 1A;Heat shock 70 kDa protein 1B	Hspa1a;Hspa1b	0.998327	0.999731	-0.000193787	0.999866	0.935053	0.995579	-0.00493851	0.996583	0.958395	0.994272	-0.00474472	0.996717	0.92808	0.991263	0.00558949	1.00388	0.678604	1	0.0574474	1.04062	0.594023	0.9775	0.0458132	1.03226	0.937629	0.996911	-0.0116342	0.991968	0.49864	0.913441	0.124332	1.09	0.315947	1	0.107108	1.07707	30.1649	30.2385	30.2364	30.1148	30.3134	30.2135	30.355	29.9323	30.1301	30.2353	30.2804
P32921	Tryptophan--tRNA ligase, cytoplasmic	Wars1	0.125201	0.818343	-0.129237	0.914315	0.120533	0.873925	-0.223792	0.856312	0.438184	0.909133	-0.0945553	0.936561	0.989206	0.995977	-0.00184155	0.998724	0.727767	0.999074	-0.0298367	0.979531	0.374065	0.899309	-0.186201	0.878917	0.446995	0.96495	-0.156364	0.897283	0.112409	0.813275	0.16497	1.12114	0.968665	1	0.0104472	1.00727	30.1358	30.3691	30.1697	30.2694	30.4383	30.4902	30.203	30.395	30.2997	30.5839	30.3483
Q80U23	Syntaphilin	Snph	0.462861	0.879007	-0.103533	0.930751	0.564653	0.969438	-0.0593832	0.959674	0.746511	0.962165	0.0441498	1.03108	0.970189	0.990595	0.00653839	1.00454	0.471486	1	-0.157326	0.896685	0.504761	0.939101	-0.0881023	0.940759	0.751334	0.99223	0.069224	1.04915	0.517148	0.888729	-0.1731	0.886935	0.547934	1	-0.110415	0.926322	30.2621	30.2645	30.4784	30.2289	30.2742	30.3421	30.8444	30.3242	30.2752	30.1504	30.4529
Q8VE33	Ganglioside-induced differentiation-associated protein 1-like 1	Gdap1l1	0.88915	0.986142	-0.00736752	0.994906	0.442033	0.938489	0.1171	1.08455	0.372495	0.876834	0.124467	1.0901	0.96845	0.991648	-0.00914478	0.993681	0.828736	0.999612	0.0177256	1.01236	0.230206	0.827481	0.231267	1.17387	0.291192	0.922361	0.213542	1.15953	0.768837	0.992161	0.0303532	1.02126	0.396939	1	0.25304	1.19172	30.2808	30.2965	30.3912	30.3103	30.3764	30.3142	30.4476	30.2054	30.2919	30.1519	30.5569
Q6NS52	Diacylglycerol kinase beta	Dgkb	0.769795	0.950329	-0.0479311	0.967323	0.923755	0.993394	-0.0201357	0.98614	0.883978	0.978956	0.0277954	1.01945	0.504992	0.81509	-0.169387	0.889221	0.914301	0.999127	0.026228	1.01835	0.496956	0.905305	0.185478	1.13719	0.559331	0.96932	0.15925	1.11671	0.73936	0.963503	0.0868727	1.06207	0.220182	1	0.41551	1.33377	30.4045	30.7334	30.7114	30.2415	30.7711	30.4744	30.6642	30.2116	30.7318	30.9411	30.6432
Q3U1J4	DNA damage-binding protein 1	Ddb1	0.268666	0.931544	0.0543839	1.03842	0.130403	0.916428	0.101758	1.07308	0.253591	0.945933	0.0473743	1.03338	0.771423	0.963551	0.0296345	1.02075	0.305804	1	0.0774441	1.05515	0.151506	0.899536	0.136645	1.09935	0.227192	0.977067	0.0592009	1.04189	0.534697	0.991006	0.0197198	1.01376	0.584335	1	0.0492862	1.03475	30.3595	30.5512	30.351	30.3584	30.3271	30.3978	30.3383	30.3578	30.3321	30.2509	30.4148
Q9CQD1	Ras-related protein Rab-5A	Rab5a	0.474177	0.947956	0.0400105	1.02812	0.145429	0.951917	0.0689462	1.04895	0.580033	0.966755	0.0289356	1.02026	0.152979	0.787974	0.116592	1.08417	0.257029	1	0.0921459	1.06595	0.0376171	0.936754	0.0626437	1.04438	0.705101	1	-0.0295022	0.979758	0.571729	0.965788	0.0570641	1.04035	0.14945	1	-0.0890306	0.940154	30.1647	30.2755	30.2859	30.2844	30.2548	30.2389	30.2733	30.2447	30.0514	30.0792	30.1814
O88544	COP9 signalosome complex subunit 4	Cops4	0.0214701	0.879282	0.0702506	1.0499	0.207175	0.971068	0.0470328	1.03314	0.402011	0.973936	-0.0232178	0.984035	0.299908	0.883493	-0.0706882	0.952184	0.100097	1	0.0699666	1.04969	0.0992806	0.914708	0.0783958	1.05584	0.773263	0.998592	0.00842921	1.00586	0.260555	0.986046	-0.0278718	0.980866	0.362182	1	0.0512457	1.03616	30.2807	30.3133	30.3789	30.2804	30.2293	30.2234	30.2808	30.2547	30.2271	30.2462	30.3479
[truncated: 3,138 more rows]
[truncated: 82 more columns]
