# Supplementary material for: The Beneficial Effect of Mitochondrial Transfer Therapy in 5XFAD Mice via Liver–Serum–Brain Response
Source: Cells. 2023 Mar 24;12(7):1006. doi: 10.3390/cells12071006 (PMC10093713; doi:10.3390/cells12071006)
Supplement: Supplementary file 1 [file cells-12-01006-s001.zip › Supplemental Liver Proteomics excel.xlsx]

## Sheet: 69930-43  proteinGroups-perseus
			Tg vs Tg-Mito				Tg vs WT				Tg-Mito vs WT				Tg-Mito F vs WT F				Tg M vs Tg-Mito M				Tg M vs WT M				Tg-Mito M vs WT M				Tg-Mito F vs Tg-Mito M				WT F vs WT M				Log2 LFQ intensity
Majority protein IDs	Protein names	Gene names	Student's T-test p-value Tg_Tg-Mito	Student's T-test q-value Tg_Tg-Mito	Student's T-test Difference Tg_Tg-Mito	Fold change	Student's T-test p-value Tg_WT	Student's T-test q-value Tg_WT	Student's T-test Difference Tg_WT	Fold change	Student's T-test p-value Tg-Mito_WT	Student's T-test q-value Tg-Mito_WT	Student's T-test Difference Tg-Mito_WT	Fold change	Student's T-test p-value Tg-Mito F_WT F	Student's T-test q-value Tg-Mito F_WT F	Student's T-test Difference Tg-Mito F_WT F	Fold change	Student's T-test p-value Tg M_Tg-Mito M	Student's T-test q-value Tg M_Tg-Mito M	Student's T-test Difference Tg M_Tg-Mito M	Fold change	Student's T-test p-value Tg M_WT M	Student's T-test q-value Tg M_WT M	Student's T-test Difference Tg M_WT M	Fold change	Student's T-test p-value Tg-Mito M_WT M	Student's T-test q-value Tg-Mito M_WT M	Student's T-test Difference Tg-Mito M_WT M	Fold change	Student's T-test p-value Tg-Mito F_Tg-Mito M	Student's T-test q-value Tg-Mito F_Tg-Mito M	Student's T-test Difference Tg-Mito F_Tg-Mito M	Fold change	Student's T-test p-value WT F_WT M	Student's T-test q-value WT F_WT M	Student's T-test Difference WT F_WT M	Fold change	LFQ intensity 81 Tg 1340.3 F	LFQ intensity 82 Tg 1336.3 M	LFQ intensity 83 Tg 1336.4 M	LFQ intensity 84 Tg 1338.2 M	LFQ intensity 85 Tg Mito 1340.1 F	LFQ intensity 86 Tg Mito 1340.2 F	LFQ intensity 87 Tg Mito 1336.1 M	LFQ intensity 88 Tg Mito 1336.2 M	LFQ intensity 89 Tg Mito 1338.1 M	LFQ intensity 90 WT 1341.1 F	LFQ intensity 91 WT 1341.2 F
Q6P8M1	Putative deoxyribonuclease TATDN1	Tatdn1	0.067739	1	-3.26572	0.103973	0.193451	1	-2.20511	0.216869	0.591851	1	1.06061	2.08582	0.470115	1	2.52786	5.76717	0.373901	1	-1.85228	0.276954	0.373901	0.523315	-1.76983	0.293243	0.975869	1	0.0824471	1.05881	0.236287	0.594146	3.5336	11.5803	0.750592	0.836046	1.08818	2.12606	17	17	17	17	22.2596	22.5121	17	22.5568	17	17	22.716
F6RWR5	Glutathione S-transferase pi 3	Gstp3	0.00981267	1	-4.88036	0.033952	0.193282	1	-2.41318	0.187742	0.234811	1	2.46718	5.52963	0.376465	0.920101	3.30739	9.89976	0.11682	1	-3.97646	0.063528	0.373901	0.507194	-2.06942	0.238255	0.543191	1	1.90704	3.7504	0.444907	0.817494	2.25974	4.78906	0.819369	0.895621	0.859392	1.81427	17	17	17	17	23.3785	23.0939	23.2156	22.7138	17	17	22.8576
Q8R4Y4	Stabilin-1	Stab1	0.193283	1	-2.09923	0.233383	0.407084	1	-1.24393	0.422222	0.645465	1	0.855299	1.80913	0.563174	1	2.13825	4.40227	NaN	1	0	1	NaN	1	0	1	NaN	1	0	1	2.24738e-05	0.4616	5.24806	38.0036	0.272228	0.362855	3.10982	8.63272	17	17	17	17	22.4008	22.0953	17	17	17	17	23.2196
A0A075B5K2	Ig-like domain-containing protein	Igkv9-124	0.193643	1	-2.42622	0.186052	0.407084	1	-1.21927	0.429499	0.54791	1	1.20695	2.30848	0.97491	1	-0.149303	0.901686	0.373901	1	-2.11111	0.231469	NaN	1	0	1	0.373901	1	2.11111	4.32024	0.835368	0.956426	0.78777	1.7264	0.272228	0.365036	3.04819	8.27171	17	17	17	17	17	22.7978	17	17	23.3333	23.0964	17
P02089	Hemoglobin subunit beta-2	Hbb-b2	0.0679295	1	-2.65446	0.158829	0.407084	1	-1.14519	0.452129	0.36681	1	1.50927	2.84665	0.86041	1	-0.713708	0.609751	0.116628	1	-2.99125	0.125761	NaN	1	0	1	0.116628	1	2.99125	7.95161	0.759535	0.925084	-0.841974	0.55788	0.272228	0.368305	2.86298	7.27517	17	17	17	17	17	21.2985	21.326	17	21.6478	22.726	17
A0A0J9YUD5	Nucleoporin 205	Nup205	0.193205	1	-2.87376	0.136431	0.407084	1	-1.25909	0.417808	0.47704	1	1.61467	3.06242	0.42265	1	3.68076	12.8239	0.373901	1	-2.33576	0.198092	0.373901	0.502136	-2.09848	0.233504	0.943392	1	0.237277	1.17877	0.763153	0.925526	1.345	2.54031	0.495025	0.566907	-2.09848	0.233504	17	17	17	17	24.3615	17	24.0073	17	17	17	17
Q8CEE7	Retinol dehydrogenase 13	Rdh13	0.0747181	1	-2.98991	0.125877	0.361511	1	-1.91392	0.26537	0.390777	1	1.07599	2.10816	0.996434	1	-0.000684738	0.999525	0.0895971	1	-4.03926	0.060822	0.455122	0.564513	-2.24549	0.210882	0.42658	1	1.79377	3.4672	0.303078	0.888902	-0.116563	0.922382	0.567403	0.657746	1.67789	3.1996	22.8207	17	17	22.4294	22.7561	22.7089	22.7465	22.8141	22.9867	22.8669	22.5995
P63321	Ras-related protein Ral-A	Rala	0.105683	1	-3.04984	0.120756	0.424192	1	-1.85488	0.276456	0.376576	1	1.19496	2.28938	0.672618	1	-0.130458	0.913541	0.129762	1	-4.15173	0.0562605	0.533481	0.613229	-2.07316	0.237638	0.38412	1	2.07857	4.22388	0.506974	0.918966	-0.119533	0.920486	0.502709	0.576604	2.08949	4.25599	23.3965	17	17	23.5405	23.0436	23.3811	23.4142	23.1813	23.4003	23.1369	23.5487
P31651	Sodium- and chloride-dependent betaine transporter	Slc6a12	0.0738551	1	-3.40584	0.0943498	0.412282	1	-1.82796	0.281662	0.251357	1	1.57787	2.9853	0.00786353	0.614	0.987369	1.98257	0.0927212	1	-4.22124	0.0536141	0.462571	0.563095	-2.2497	0.210268	0.402875	1	1.97154	3.92188	0.205123	0.765385	0.990729	1.98719	0.510759	0.584622	1.97491	3.93102	23.7067	17	17	22.5798	23.9975	24.1463	23.5536	23.5564	22.1336	23.1316	23.0374
Q3ULF4	Paraplegin	Spg7	0.0660166	1	-4.48451	0.0446714	0.350533	1	-2.83352	0.140289	0.369944	1	1.65098	3.14047	0.927678	1	0.0492048	1.03469	0.107127	1	-5.8021	0.0179224	0.48952	0.575564	-3.08327	0.11799	0.409989	1	2.71883	6.58339	0.719084	0.94351	-0.182935	0.880909	0.560235	0.643182	2.48669	5.60491	24.7665	25.3666	17	17	25.8188	24.9972	26.0436	25.1133	25.616	25.1109	25.6068
Q3U5Q7	UMP-CMP kinase 2, mitochondrial	Cmpk2	0.20415	1	-2.09581	0.233937	0.707755	1	-0.848329	0.555428	0.42113	1	1.24748	2.37426	0.558605	1	0.414092	1.33246	0.30845	1	-2.38664	0.191227	0.859459	0.873595	-0.583574	0.667308	0.481258	1	1.80307	3.48962	0.0463153	0.31431	1.24229	2.36575	0.446356	0.487316	2.63127	6.19573	24.1628	23.6844	22.3508	17	24.1926	25.0888	23.524	23.1233	23.5479	24.6184	23.8348
E9Q3L2	Phosphatidylinositol 4-kinase alpha	Pi4ka	0.320283	1	-2.40567	0.188721	0.701484	1	-0.84024	0.55855	0.488098	1	1.56543	2.95966	0.00235	0.864	6.47472	88.9377	0.373901	1	-2.20974	0.216173	0.116364	0.333477	-3.91718	0.0661931	0.594241	1	-1.70743	0.306205	0.232995	0.575251	4.26498	19.2259	0.219431	0.24932	-3.91718	0.0661931	23.0403	17	17	17	23.1603	23.7892	23.6292	17	17	17	17
Q8VDC1	FYVE and coiled-coil domain-containing protein 1	Fyco1	0.37592	1	-2.66619	0.157542	0.717744	1	-1.05245	0.48215	0.566299	1	1.61375	3.06046	0.998443	1	0.0123739	1.00861	0.546845	1	-2.47069	0.180404	0.957305	0.958035	0.210637	1.1572	0.498778	1	2.68133	6.41447	0.804415	0.937858	-1.20989	0.432301	0.761155	0.844436	1.45907	2.7493	17	25.1535	17	17	17	24.9573	17	24.6177	24.9479	17	24.9325
Q8CGR7	Uridine phosphorylase 2	Upp2	0.268783	1	-2.75743	0.147887	0.603769	1	-1.17621	0.442512	0.517183	1	1.58122	2.99222	0.010481	0.818667	7.24977	152.194	0.939532	1	-0.223803	0.856305	0.442356	0.561995	-2.42162	0.186646	0.503515	1	-2.19782	0.217967	0.153811	0.407902	5.1809	36.2748	0.224014	0.258955	-4.26669	0.0519514	17	17	22.5352	17	24.9979	23.5017	17	23.2066	17	17	17
Q9JMA7	Cytochrome P450 3A41	Cyp3a41b	0.274105	1	-4.17195	0.0554775	0.622077	1	-2.0825	0.236105	0.58965	1	2.08946	4.25588	0.89523	1	0.14477	1.10555	0.117206	1	-3.38592	0.0956617	NaN	1	0	1	0.117206	1	3.38592	10.4535	0.0323277	0.366286	8.6088	390.398	9.10457e-05	0.139059	11.8499	3691.39	27.6299	17	17	17	28.1939	29.7956	21.8129	22.3449	17	28.2997	29.4002
P52843;L7N245	Bile salt sulfotransferase 1;Sulfotransferase	Sult2a1;Sult2a4	0.22793	1	-4.53295	0.0431964	0.457153	1	-2.57771	0.167507	0.619625	1	1.95524	3.8778	0.360378	0.940565	1.7536	3.37198	0.373901	1	-2.08966	0.234935	NaN	1	0	1	0.373901	1	2.08966	4.25649	0.0349198	0.351922	10.1629	1146.4	0.00147034	0.296114	10.499	1447.12	23.4875	17	17	17	30.0761	28.429	17	23.269	17	26.257	28.7409
P81117	Nucleobindin-2	Nucb2	0.0833884	1	-2.06885	0.238349	0.0912333	1	1.93719	3.82959	1.43951e-07	0.224	4.00604	16.0671	0.000135861	1	3.76852	13.6282	0.0738002	1	-2.98663	0.126164	0.373901	0.5436	1.17775	2.26224	0.000438546	0.738857	4.16439	17.931	0.490597	0.854259	-0.395868	0.760032	NaN	1	0	1	21.2155	17	17	20.5333	20.7246	20.8125	20.8395	21.9422	20.7115	17	17
O08915	AH receptor-interacting protein	Aip	0.0841366	1	-2.99379	0.12554	0.415111	1	1.73691	3.3332	0.00409239	0.807	4.73069	26.551	0.42959	1	2.91884	7.5624	0.356601	1	-2.03888	0.243352	0.116795	0.341007	3.89971	14.9255	8.96152e-07	0.546	5.93859	61.3331	0.792124	0.975125	-0.0500635	0.965894	0.272228	0.367298	2.96969	7.83367	17	17	22.6079	23.0912	22.7725	23.0046	23.1201	22.9753	22.7204	17	22.9394
Q9CRB8	Mitochondrial fission process protein 1	Mtfp1	0.474111	1	-0.993545	0.502242	0.263654	1	2.36533	5.15271	0.0308872	1	3.35888	10.2594	0.000109798	1	5.64433	50.0163	0.0550722	1	0.624564	1.54174	0.229745	0.39082	2.45981	5.50142	0.35382	1	1.83524	3.56831	0.335591	0.837939	0.33924	1.26509	0.219429	0.266548	-3.46985	0.0902552	17	22.8276	22.9867	22.9747	22.5852	22.7035	21.8615	22.6116	22.4421	17	17
P63328	Serine/threonine-protein phosphatase 2B catalytic subunit alpha isoform	Ppp3ca	0.410665	1	-1.38184	0.383728	0.329579	1	2.56678	5.92485	0.04713	1	3.94862	15.4402	0.408592	0.986111	3.58593	12.0081	0.130368	1	0.604228	1.52016	0.102639	0.268211	4.79464	27.7544	0.138394	1	4.19042	18.2575	0.306136	0.82556	0.556159	1.47035	0.784061	0.869163	1.16064	2.23557	17	23.5579	24.3709	24.2345	24.5098	23.5029	23.0716	23.7208	23.5582	23.8409	17
Q6DYE8	Ectonucleotide pyrophosphatase/phosphodiesterase family member 3	Enpp3	0.381139	1	-1.43875	0.368888	0.303397	1	2.63555	6.21411	0.0343125	1	4.0743	16.8455	0.00184337	0.8608	6.75844	108.266	0.0149132	1	0.360483	1.28386	0.290251	0.390867	2.64535	6.25646	0.352363	1	2.28486	4.87318	0.619749	0.932414	0.129989	1.09429	0.219102	0.233512	-4.34359	0.0492548	17	24.0869	23.9185	23.9614	24.049	23.4679	23.6685	23.7284	23.4885	17	17
Q8BR90	UPF0600 protein C5orf51 homolog	MGI:2146232	0.223073	1	-1.74822	0.297669	0.346879	1	2.04706	4.13262	0.02851	1	3.79528	13.8833	0.799152	1	0.121272	1.08769	0.304811	1	-2.34437	0.196913	0.11664	0.337733	3.90025	14.9311	9.37151e-05	0.712	6.24461	75.8257	0.531444	0.856712	-0.42159	0.746601	3.02577e-08	0.109714	5.70175	52.0473	22.6103	23.0626	22.6381	17	22.4052	23.2409	24.0343	22.8779	22.8216	22.6834	22.7201
D4AFX7	J domain-containing protein	Dnajc13	0.274399	1	-2.10264	0.232832	0.340618	1	2.87954	7.35914	0.0329453	1	4.98218	31.6071	0.408548	0.984725	4.24976	19.0242	0.356536	1	-2.73873	0.149817	0.495001	0.580899	2.73173	6.64251	0.0962266	0.990087	5.47046	44.3375	0.110107	0.798532	0.352708	1.27695	0.747813	0.830291	1.5734	2.97606	25.3633	24.8101	17	24.9536	25.2769	25.4151	25.2196	24.9133	24.8469	17	25.1925
Q9R0X4;Q32MW3	Acyl-coenzyme A thioesterase 9, mitochondrial;Acyl-coenzyme A thioesterase 10, mitochondrial	Acot9;Acot10	0.390759	1	-1.30482	0.404772	0.679276	1	0.954285	1.93762	0.180842	1	2.2591	4.78694	0.341367	1	-0.398183	0.758813	0.400216	1	-1.94143	0.260359	0.48549	0.578275	2.0892	4.25512	0.10166	1	4.03063	16.3433	0.79312	0.955355	0.181612	1.13415	0.14891	0.151108	4.61042	24.4273	23.766	22.1951	23.5917	17	22.9844	23.1196	22.1376	22.6748	23.7988	23.7647	23.1357
Q9D2M8	Ubiquitin-conjugating enzyme E2 variant 2	Ube2v2	0.672278	1	-1.34179	0.394532	0.292352	1	2.11947	4.34534	0.141161	1	3.46126	11.0139	0.42265	1	4.27072	19.3026	0.982353	1	-0.0956535	0.935848	0.373901	0.467673	2.82596	7.09085	0.373901	1	2.92161	7.57692	0.802324	0.939537	1.34911	2.54755	NaN	1	0	1	17	17	25.4779	17	25.5414	17	17	17	25.7648	17	17
Q6GQS1	Calcium-binding mitochondrial carrier protein SCaMC-3	Slc25a23	0.322856	1	-1.49026	0.355949	0.726373	1	0.83261	1.7809	0.185926	1	2.32287	5.00325	0.427916	1	3.05618	8.31767	0.358129	1	-2.15832	0.224016	0.920067	0.928869	-0.324334	0.798667	0.459048	1	1.83399	3.56522	0.72127	0.943345	-0.130627	0.913434	0.738002	0.822469	-1.35282	0.391527	23.5898	23.3134	17	23.0661	23.1938	23.1146	23.6001	23.479	22.7754	17	23.1961
Q91YJ2	Sorting nexin-4	Snx4	0.429192	1	-1.55427	0.340501	0.633916	1	0.907117	1.87529	0.15304	1	2.46139	5.50746	0.42265	1	2.45099	5.46791	0.103272	1	-3.73136	0.0752919	0.598197	0.671994	-1.26304	0.416664	0.210174	1	2.46832	5.53398	0.249967	0.639198	-2.90681	0.133341	0.231502	0.306495	-2.88948	0.134952	22.6839	17	21.8793	17	17	21.902	23.7679	21.5305	21.775	17	17
Q9JJW0	Peroxisomal membrane protein 4	Pxmp4	0.253965	1	-1.66469	0.315412	0.599637	1	1.13004	2.18865	0.0820884	1	2.79473	6.93902	0.315872	0.837025	3.32763	10.0396	0.302821	1	-2.38255	0.19177	0.984932	0.985169	0.0569159	1.04024	0.288016	1	2.43946	5.4244	0.168083	0.808042	-0.609528	0.655411	0.668103	0.762553	-1.4977	0.354118	22.9219	22.881	23.1963	17	22.367	23.2305	23.4259	23.5322	23.2669	17	21.9423
Q99P88	Nuclear pore complex protein Nup155	Nup155	0.261308	1	-1.66961	0.314338	0.711418	1	0.856234	1.81031	0.142653	1	2.52585	5.75911	0.484556	1	2.81543	7.03929	0.3211	1	-2.33134	0.1987	0.999626	0.999637	0.00144958	1.00101	0.320758	1	2.33279	5.03778	0.195857	0.818085	-0.322687	0.799579	0.838337	0.909487	-0.805329	0.572232	23.2439	23.1901	23.1497	17	22.9763	23.2676	23.5267	23.6083	23.1989	17	23.613
Q8R574	Phosphoribosyl pyrophosphate synthase-associated protein 2	Prpsap2	0.39063	1	-1.7796	0.291264	0.459594	1	1.57445	2.97822	0.0843	1	3.35405	10.2252	0.448498	1	2.91626	7.54889	0.967276	1	0.114601	1.08268	0.116855	0.350573	3.76051	13.5528	0.11671	1	3.64591	12.5178	0.386925	0.824198	2.38519	5.22411	0.272228	0.363233	3.11483	8.66281	17	22.3976	22.8839	17	22.8691	23.1931	17	22.6803	22.2575	17	23.2297
Q9CX30	Protein YIF1B	Yif1b	0.290196	1	-1.7984	0.287493	0.725238	1	0.940521	1.91922	0.166992	1	2.73892	6.67572	0.886586	1	-0.0532618	0.963755	0.391334	1	-2.28087	0.205774	0.531402	0.609722	2.31951	4.99163	0.130364	1	4.60038	24.2579	0.292347	0.839147	0.296714	1.22834	0.211688	0.209345	4.95036	30.9176	24.1444	23.8868	17	24.3327	24.0552	24.5797	24.1289	23.825	24.1082	24.5709	24.1705
Q8BKE6	Cytochrome P450 20A1	Cyp20a1	0.247719	1	-1.88871	0.270049	0.633701	1	1.16524	2.2427	0.0928596	1	3.05394	8.30478	0.278548	1	0.340646	1.26632	0.327683	1	-2.45658	0.182177	0.459468	0.564081	2.40622	5.30085	0.0695638	1	4.86281	29.0972	0.473213	0.85494	0.277351	1.21197	0.154473	0.155056	4.79951	27.8482	24.0837	23.8979	23.2073	17	24.3279	23.8768	23.4838	23.7335	24.2577	23.8125	23.7108
Q91X36	Sulfotransferase	Sult5a1	0.161785	1	-2.69703	0.15421	0.805605	1	0.637508	1.55564	0.0844891	1	3.33454	10.0878	0.526574	1	2.92618	7.60093	0.181638	1	-3.38138	0.0959629	0.938833	0.94203	0.225407	1.16911	0.126359	1	3.60679	12.1829	0.131222	0.458726	1.29428	2.45254	0.630443	0.721808	1.97489	3.93097	23.8693	17	17	23.1832	23.189	24.2844	22.1046	22.0426	23.1801	17	24.6211
Q8CHH9	Septin-8	Septin8	0.054413	1	-3.39206	0.0952548	0.920307	1	0.242229	1.18282	0.0551622	1	3.63429	12.4174	0.807782	1	0.0661821	1.04694	0.110206	1	-4.04364	0.0606378	0.373901	0.512012	1.9694	3.91604	3.57673e-06	0.421	6.01304	64.5809	0.0665082	0.489217	0.620711	1.53763	4.04616e-05	0.167158	6.56756	94.8492	22.5688	17	22.9082	17	23.5791	23.6884	22.8291	22.8629	23.3471	23.8002	23.335
P02798	Metallothionein-2	Mt2	0.290367	1	-0.991065	0.503106	0.689622	1	0.426997	1.34443	0.173191	1	1.41806	2.67226	0.252272	0.782265	1.26433	2.40215	0.176501	1	-1.75687	0.295888	0.872982	0.89579	-0.236323	0.848906	0.409875	1	1.52055	2.86901	0.748364	0.927991	-0.468476	0.722728	0.912132	0.961207	-0.212251	0.86319	27.9474	25.7539	26.2778	24.8695	27.4279	26.4164	27.7296	28.9103	25.532	25.0459	26.2698
O88876	Short-chain dehydrogenase/reductase 3	Dhrs3	0.26918	1	-1.62104	0.3251	0.999878	0.999764	0.000293827	1.0002	0.1999	1	1.62134	3.0766	0.364223	0.89491	3.55585	11.7603	0.414553	1	-1.84151	0.279029	0.497514	0.591282	-1.50985	0.351147	0.0978439	1	0.331657	1.25846	0.0327815	0.381895	0.718541	1.64552	0.351342	0.429132	-2.50566	0.176085	23.074	22.9426	17	23.1847	23.7929	23.4121	23.0578	22.8785	22.7156	17	23.0933
Q91V04	Translocating chain-associated membrane protein 1	Tram1	0.323721	1	-2.15981	0.223786	0.8031	1	0.542633	1.45663	0.183252	1	2.70244	6.50902	0.373089	0.933613	3.22453	9.34719	0.876916	1	-0.476037	0.71895	0.511596	0.59877	1.87834	3.67652	0.447512	1	2.35438	5.11374	0.540009	0.851384	1.92394	3.79459	0.757724	0.845049	1.05379	2.07598	17	17	23.4471	21.5232	22.9692	23.1443	22.1066	24.2918	17	17	22.6644
Q8BG94	COMM domain-containing protein 7	Commd7	0.799172	1	-0.868988	0.547531	0.394804	1	2.6642	6.33876	0.23278	1	3.53319	11.577	0.42265	1	-4.25741	0.0522868	0.377081	1	-2.90403	0.133598	0.11631	0.299243	5.82288	56.606	5.0943e-06	1	8.72692	423.706	0.0001326	0.431667	-8.72692	0.00236013	0.272228	0.343205	4.25741	19.1253	17	25.9272	25.5414	17	17	17	25.5427	26.25	25.3881	25.5148	17
P02802	Metallothionein-1	Mt1	0.166792	1	-1.24612	0.421581	0.925795	1	-0.0971856	0.934855	0.217899	1	1.14893	2.2175	0.110923	0.53636	1.09715	2.13931	0.117878	1	-1.93546	0.261439	0.61457	0.69068	-0.752	0.59378	0.486645	1	1.18346	2.2712	0.840058	0.962289	-0.245899	0.84329	0.9303	0.972785	-0.159591	0.895279	28.1638	25.7564	26.6525	24.9908	27.7985	27.1804	27.9598	29.0783	26.1681	26.1393	26.6454
Q68FF9	3-oxo-5-alpha-steroid 4-dehydrogenase 1	Srd5a1	0.627273	1	-0.838857	0.559086	0.956938	1	0.122663	1.08874	0.520362	1	0.96152	1.94736	0.45944	1	2.41646	5.33861	0.328666	1	0.202787	1.15092	0.533922	0.731927	0.194344	1.1442	0.981282	1	-0.00844256	0.994165	0.00425139	0.444108	-1.85323	0.276773	0.123941	0.137168	-4.27813	0.0515411	17	24.1202	24.109	24.166	22.0536	22.0979	23.7881	24.2893	23.7095	17	22.3185
Q3UQN2	F-BAR domain only protein 2	Fcho2	0.683337	1	-0.868151	0.547849	0.874173	1	0.297003	1.22859	0.539259	1	1.16515	2.24257	0.415634	1	2.91288	7.53123	NaN	1	0	1	NaN	1	0	1	NaN	1	0	1	4.24655e-05	0.457091	5.76561	54.403	0.272228	0.368632	2.85273	7.22366	22.7524	17	17	17	22.5581	22.9731	17	17	17	17	22.7055
P30275	Creatine kinase U-type, mitochondrial	Ckmt1	0.407084	1	-1.16662	0.445465	NaN	1	0	1	0.346594	1	1.16662	2.24485	0.42265	1	2.91654	7.55034	NaN	1	0	1	NaN	1	0	1	NaN	1	0	1	0.272228	0.760297	2.91654	7.55034	NaN	1	0	1	17	17	17	17	22.8331	17	17	17	17	17	17
Q3UVK0	Endoplasmic reticulum metallopeptidase 1	Ermp1	0.525488	1	-1.17981	0.44141	0.733356	1	0.696639	1.62073	0.267241	1	1.87645	3.6717	0.42265	1	2.53408	5.79206	0.552556	1	-1.17808	0.441938	0.921544	0.930423	0.259949	1.19744	0.443413	1	1.43803	2.70951	0.320787	0.820709	-2.24847	0.210447	0.22252	0.28192	-3.34452	0.0984463	17	22.028	17	22.7854	22.0682	17	21.6482	22.0166	21.6829	17	17
Q8R0K2	E3 ubiquitin-protein ligase TRIM31	Trim31	0.407084	1	-1.2067	0.433258	NaN	1	0	1	0.346594	1	1.2067	2.30809	NaN	1	0	1	0.373901	1	-2.01117	0.248072	NaN	1	0	1	0.373901	1	2.01117	4.03108	0.495025	0.819085	-2.01117	0.248072	NaN	1	0	1	17	17	17	17	17	17	23.0335	17	17	17	17
Q78IS1	Transmembrane emp24 domain-containing protein 3	Tmed3	0.383961	1	-1.28723	0.409736	0.909031	1	-0.22612	0.854931	0.417781	1	1.06111	2.08654	0.108664	0.623579	-0.755308	0.59242	0.766386	1	-0.131452	0.912912	0.340013	0.436112	2.14061	4.40947	0.322425	1	2.27206	4.83012	0.185593	0.740969	-0.914296	0.530603	0.468559	0.512083	2.11307	4.32611	17	23.3058	22.9372	23.015	22.5009	22.1054	22.6961	23.9987	22.9575	23.2447	22.8722
Q8CI78	Required for meiotic nuclear division protein 1 homolog	Rmnd1	0.31408	1	-1.29802	0.406685	0.873251	1	-0.278196	0.824622	0.37242	1	1.01982	2.02767	0.197437	1	0.309684	1.23944	0.37178	1	-1.67101	0.314033	0.944518	0.947633	-0.177764	0.884072	0.442052	1	1.49325	2.81522	0.0679447	0.460762	0.698138	1.62241	0.464574	0.512157	1.8817	3.68509	22.9039	22.1494	21.7352	17	22.7147	22.6133	22.2517	22.0424	21.6035	22.509	22.1996
Q9Z1X4	Interleukin enhancer-binding factor 3	Ilf3	0.322699	1	-1.46621	0.361931	0.866496	1	-0.344483	0.78759	0.399555	1	1.12173	2.17608	0.470451	1	2.75737	6.76162	0.341928	1	-2.21385	0.215558	0.347482	0.444633	-2.18255	0.220285	0.839012	1	0.0313009	1.02193	0.0809309	0.784653	-0.427361	0.743621	0.268806	0.353728	-3.15343	0.112389	23.4007	22.9198	17	23.3619	22.923	22.8378	23.4173	23.0577	23.4482	23.246	17
Q9ESZ8	General transcription factor II-I	Gtf2i	0.312855	1	-1.48345	0.357634	0.90672	1	-0.236041	0.849072	0.338363	1	1.2474	2.37414	0.813756	1	-0.0657005	0.955481	0.389078	1	-2.00025	0.249957	0.968165	0.964386	0.122557	1.08866	0.35074	1	2.12281	4.35541	0.904592	0.984004	-0.0236772	0.983722	0.465605	0.508806	2.16483	4.48414	23.1717	23.2292	23.1978	17	23.3339	22.9039	23.2029	23.2149	23.0099	23.0669	23.3023
Q8BVQ5	Protein phosphatase methylesterase 1	Ppme1	0.268962	1	-1.56941	0.336946	0.83027	1	-0.422395	0.746185	0.375339	1	1.14702	2.21456	0.492269	1	2.66454	6.34027	0.30466	1	-2.26349	0.208268	0.329891	0.418415	-2.12816	0.22875	0.447917	1	0.135332	1.09835	0.288149	0.849726	-0.238809	0.847445	0.329724	0.403733	-2.76802	0.146806	23.2309	22.6841	17	22.8259	22.8925	22.8302	23.2008	23.2808	22.8189	17	23.3936
A0A075B5V8	Ig-like domain-containing protein	Ighv1-47	0.407084	1	-1.63082	0.322905	NaN	1	0	1	0.346594	1	1.63082	3.09689	NaN	1	0	1	0.373901	1	-2.71803	0.151981	NaN	1	0	1	0.373901	1	2.71803	6.57976	0.495025	0.821228	-2.71803	0.151981	NaN	1	0	1	17	17	17	17	17	17	17	17	25.1541	17	17
Q923G2	DNA-directed RNA polymerases I, II, and III subunit RPABC3	Polr2h	0.246703	1	-1.65793	0.316893	0.841376	1	-0.392066	0.762038	0.328157	1	1.26587	2.40472	0.393007	0.977927	3.28119	9.7216	0.344149	1	-2.07536	0.237277	0.329713	0.418559	-2.15304	0.224839	0.744134	1	-0.0776812	0.947579	0.255513	0.811026	0.383019	1.30407	0.280474	0.372468	-2.97586	0.12711	23.1276	22.4252	23.11	17	23.6089	22.9981	22.7071	23.1107	22.9436	17	23.0446
P54731	FAS-associated factor 1	Faf1	0.342984	1	-1.66603	0.315119	0.884094	1	0.217284	1.16254	0.235442	1	1.88332	3.68922	0.395219	0.984577	2.47895	5.57491	0.991677	1	0.02351	1.01643	0.373901	0.526861	1.50974	2.84759	0.373901	1	1.48623	2.80156	0.188171	0.464452	3.28027	9.71538	0.272228	0.374695	2.28755	4.88227	17	17	21.5292	17	22.0749	21.4581	17	17	21.4587	17	21.5751
P16110	Galectin-3	Lgals3	0.284259	1	-1.6687	0.314537	0.856424	1	-0.386302	0.765088	0.360677	1	1.2824	2.43243	0.930021	1	0.0513258	1.03622	0.337549	1	-2.24001	0.211685	0.965328	0.963519	-0.136898	0.909473	0.379699	1	2.10311	4.29634	0.397034	0.851254	0.368221	1.29076	0.444197	0.486764	2.42	5.35173	23.9837	23.2751	17	23.0529	23.2433	24.1918	23.3691	23.5009	23.178	23.4595	23.873
Q8CDG3	Deubiquitinating protein VCIP135	Vcpip1	0.373703	1	-1.77045	0.293117	0.816028	1	0.492388	1.40677	0.231891	1	2.26284	4.79935	0.896569	1	0.0749111	1.0533	0.956504	1	-0.149862	0.901337	0.116244	0.344558	3.57159	11.8893	0.116634	1	3.72146	13.1908	0.509022	0.836847	1.81922	3.52892	2.23694e-05	0.1782	5.46577	44.1937	17	22.2614	17	22.4534	22.0567	23.0247	22.3808	22.7836	17	22.6246	22.3069
Q3UI43	BRISC and BRCA1-A complex member 1	Babam1	0.239826	1	-1.77356	0.292485	0.927075	1	-0.184835	0.87975	0.227869	1	1.58873	3.00784	0.376243	0.927045	3.46067	11.0095	0.587732	1	-0.16523	0.891786	0.561222	0.748467	0.175537	1.12938	0.00929905	1	0.340768	1.26643	0.466314	0.907017	0.127871	1.09268	0.281184	0.372918	-2.99203	0.125692	17	23.7288	22.7833	23.1741	23.3434	23.7003	23.4183	23.4828	23.2808	17	23.1223
Q7TSI3	Serine/threonine-protein phosphatase 6 regulatory subunit 1	Ppp6r1	0.352337	1	-1.84162	0.279008	0.777526	1	-0.589565	0.664543	0.491365	1	1.25206	2.38181	0.369363	1	0.289028	1.22182	0.983823	1	-0.0540218	0.963247	0.490513	0.584878	1.84006	3.58024	0.482076	1	1.89408	3.71685	0.397395	0.835994	2.27281	4.83265	0.171122	0.171195	3.87787	14.7012	17	22.2826	22.2591	17	23.0285	22.653	17	22.4383	22.2655	22.7191	22.3843
P97501	Dimethylaniline monooxygenase [N-oxide-forming] 3	Fmo3	0.668696	1	-1.90253	0.267473	0.904099	1	-0.568113	0.674499	0.782059	1	1.33442	2.52174	0.966442	1	-0.0459204	0.968672	0.907904	1	0.32435	1.2521	0.1308	0.381176	2.579	5.97526	0.373901	1	2.25465	4.77219	0.0292583	0.406571	11.7516	3448.07	1.38645e-05	0.248	14.0521	16987	29.474	17	21.6173	20.1197	30.104	31.9085	17	17	23.764	30.704	31.4002
Q9DBK7	UBA_e1_C domain-containing protein	Uba7	0.352369	1	-1.93374	0.261749	0.701507	1	-0.765928	0.588075	0.553484	1	1.16782	2.24671	0.681977	1	0.335235	1.26158	0.373901	1	-1.72287	0.302945	NaN	1	0	1	0.373901	1	1.72287	3.30093	0.175296	0.452296	3.93186	15.2619	0.00205602	0.289238	5.3195	39.9327	22.4475	17	17	17	22.6108	22.6987	17	22.1686	17	21.6142	23.0248
Q8R0P4	Mth938 domain-containing protein	Aamdc	0.246334	1	-2.00658	0.248862	0.84572	1	-0.462148	0.725905	0.326059	1	1.54444	2.9169	0.500414	1	-0.237335	0.848311	0.345721	1	-2.58641	0.166499	0.967356	0.964933	0.14587	1.1064	0.30951	1	2.73228	6.64506	0.928233	0.983485	-0.0405273	0.972299	0.402623	0.458275	2.92909	7.6163	24.0645	17	24.2264	24.2036	24.1027	24.6091	24.324	23.9419	24.9234	24.7367	24.4498
E9PUP1	Rho-GAP domain-containing protein	Syde2	0.298028	1	-2.31939	0.200352	0.954906	1	0.168416	1.12382	0.201329	1	2.48781	5.60926	0.322945	0.883639	1.68291	3.21075	0.389736	1	-2.96089	0.128435	0.988969	0.990171	0.0635223	1.04501	0.377349	1	3.02441	8.1365	0.198272	0.822781	0.56488	1.47926	0.66905	0.760871	1.90638	3.74867	26.6007	26.2404	26.1525	17	26.3556	26.9578	25.7287	26.423	26.1239	26.2318	23.7159
P27786	Steroid 17-alpha-hydroxylase/17,20 lyase	Cyp17a1	0.351867	1	-2.60688	0.164154	0.921227	1	-0.325132	0.798225	0.438293	1	2.28175	4.86266	0.247991	0.887118	0.747276	1.67862	0.032245	1	-2.05972	0.239862	0.218146	0.392565	1.245	2.37019	0.0180014	0.898	3.30473	9.88147	0.00180921	0.674526	6.56809	94.8841	0.00257538	0.2939	9.12554	558.55	27.7848	19.9413	19.8893	18.5628	28.3731	27.8115	21.843	22.0997	20.63	26.9767	27.7133
Q03734	Serine protease inhibitor A3M	Serpina3m	0.14844	1	0.870973	1.8289	0.0237084	1	4.51747	22.9031	0.0320745	1	3.6465	12.5229	0.0652505	0.521633	1.46934	2.76896	0.36917	1	0.839135	1.78898	0.0323273	0.278909	5.93707	61.2685	0.0551093	0.947636	5.09794	34.2478	0.836829	0.963787	0.199403	1.14822	0.195527	0.19128	3.828	14.2018	25.1621	25.6794	24.0867	24.3809	23.8065	24.3454	23.5446	22.9176	25.1674	22.8953	22.3179
P26450	Phosphatidylinositol 3-kinase regulatory subunit alpha	Pik3r1	0.0594438	1	3.80308	13.9586	3.46919e-12	0.004	6.23779	75.4678	0.141225	1	2.43471	5.40656	0.42265	1	2.98343	7.90864	0.117173	1	4.12478	17.4454	2.00726e-07	0.095	6.19368	73.1951	0.373901	1	2.0689	4.19566	0.809481	0.942765	0.91453	1.88496	NaN	1	0	1	23.3701	23.0261	23.2757	23.2792	17	22.9669	17	17	23.2067	17	17
Q8K2H2	Deubiquitinase OTUD6B	Otud6b	0.195184	1	2.49613	5.64169	0.004489	0.350667	5.14533	35.3914	0.195117	1	2.6492	6.27319	0.42265	1	3.17724	9.04573	0.362036	1	2.14058	4.4094	0.0737172	0.246553	4.43775	21.6719	0.448987	1	2.29717	4.91494	0.810201	0.942232	-0.932151	0.524076	0.495025	0.575656	-1.81222	0.284753	23.1807	23.1834	23.8609	22.7056	23.3545	17	23.2323	23.0959	17	17	17
P16301	Phosphatidylcholine-sterol acyltransferase	Lcat	0.18458	1	2.58749	6.01051	0.0653152	1	3.84374	14.3576	0.582172	1	1.25625	2.38874	0.425205	1	3.07831	8.44622	0.133216	1	4.13621	17.5843	0.124979	0.362391	4.17776	18.098	0.989868	1	0.0415452	1.02922	0.255083	0.63633	3.97948	15.774	0.811063	0.887286	0.942716	1.92214	23.5037	23.1692	23.2184	23.6068	23.0533	23.2961	17	23.5858	17	17	23.1929
Q9DBR0	A-kinase anchor protein 8	Akap8	0.180581	1	2.38721	5.23146	0.0628946	1	3.53782	11.6142	0.578801	1	1.15061	2.22007	0.472414	1	2.62228	6.1572	0.132414	1	3.80595	13.9864	0.0981732	0.27008	3.97544	15.73	0.953157	1	0.169495	1.12466	0.257878	0.638147	3.6022	12.1442	0.746501	0.832154	1.14942	2.21825	22.8948	23.3461	22.5331	22.5393	22.422	22.7828	17	23.0007	17	17	22.9603
Q62270	Tyrosine-protein kinase Srms	Srms	0.409826	1	1.99712	3.99201	4.60771e-13	0	10.0201	1038.33	0.00397778	0.505333	8.02294	260.102	4.8248e-05	1	10.0767	1079.89	0.380779	1	3.27864	9.70441	1.26536e-10	0	9.93242	977.139	0.116486	1	6.65378	100.69	0.484309	0.824264	3.42289	10.7249	NaN	1	0	1	27.2829	26.8899	26.9512	26.9562	27.1467	27.0067	17	27.2848	26.6765	17	17
Q8CGB6	Tensin-2	Tns2	0.402763	1	-0.101975	0.931757	0.00627245	0.43	4.3398	20.2492	0.00208028	0.592	4.44177	21.7323	4.6192e-05	1	5.49695	45.1593	0.876739	1	-0.0283101	0.980568	0.0886001	0.268889	3.71001	13.0865	0.0868953	1	3.73832	13.3458	0.541422	0.930716	0.107144	1.07709	0.495025	0.576721	-1.65149	0.318311	22.2383	22.59	22.3276	22.1669	22.4596	22.5343	22.1576	22.5501	22.4617	17	17
Q8JZU6	PX domain-containing protein 1	Pxdc1	0.469478	1	-0.347027	0.786203	0.0244289	1	5.69848	51.9294	0.00919412	1	6.04551	66.0509	0.24881	0.6946	5.65914	50.5325	0.778559	1	-0.183408	0.88062	0.0685529	0.249895	6.11968	69.5354	0.0632079	0.952667	6.30308	78.9619	0.634256	0.882562	0.381804	1.30297	0.817042	0.894043	1.02575	2.03602	25.5095	24.9941	26.4133	25.2519	26.7496	25.487	25.4875	25.1558	26.5662	17	23.9183
Q9CRA8	Exosome complex component RRP46	Exosc5	0.281778	1	-0.349159	0.785042	0.105341	1	3.11388	8.65705	0.0491774	1	3.46303	11.0275	0.483971	1	2.55044	5.85811	0.283168	1	-0.497204	0.708478	0.151813	0.382841	3.57423	11.9111	0.118274	1	4.07143	16.8122	0.347501	0.813018	-0.545602	0.685106	0.794558	0.880928	0.975398	1.96618	22.3106	22.3432	22.8109	22.6202	22.6197	22.4664	23.8095	22.5326	22.9238	17	22.9852
P42925	Peroxisomal membrane protein 2	Pxmp2	0.105117	1	-0.643606	0.640111	0.428004	1	0.225593	1.16926	0.00448467	1	0.869199	1.82665	0.220816	0.824344	0.79117	1.73048	0.133778	1	-0.856584	0.552259	0.874926	0.92389	0.0646337	1.04582	0.0343798	1	0.921218	1.89371	0.666349	0.918779	-0.225238	0.855454	0.627073	0.886212	-0.0951904	0.936149	26.1704	25.5969	26.354	25.0857	25.8805	26.74	27.0428	26.4389	26.1247	25.6527	25.3854
A2AKX3	Probable helicase senataxin	Setx	0.335185	1	3.40453	10.5893	0.0121235	0.598286	7.04831	132.359	0.141555	1	3.64378	12.4994	0.42265	1	4.73311	26.5955	0.500903	1	3.12953	8.75151	0.12013	0.319055	6.04709	66.1237	0.373901	1	2.91756	7.55569	0.748246	0.917284	1.81555	3.51993	NaN	1	0	1	27.052	26.9836	17	25.1577	26.4662	17	25.7527	17	17	17	17
O88783	Coagulation factor V	F5	0.448841	1	-0.523803	0.695536	0.0459303	1	0.85999	1.81503	0.0670571	1	1.38379	2.60953	0.486756	1	0.662599	1.58293	0.301137	1	-1.04646	0.484156	0.107768	0.376236	0.818131	1.76312	0.125943	1	1.86459	3.64164	0.381992	0.825816	-1.19235	0.43759	0.990327	0.997058	0.0096426	1.00671	26.0737	25.9292	25.873	25.8704	26.0867	25.4033	28.7009	26.0793	26.0318	24.3774	25.7874
Q99JV5	StAR-related lipid transfer protein 4	Stard4	0.0701823	1	0.671151	1.59234	0.094626	1	2.07185	4.20425	0.186009	1	1.4007	2.64029	0.066636	0.534466	0.889827	1.85295	0.147236	1	0.772792	1.70857	0.19605	0.383986	2.51407	5.7123	0.351197	1	1.74128	3.34332	0.449335	0.844483	0.447973	1.36412	0.575839	0.674908	1.29943	2.46131	23.0131	23.0724	22.6923	22.344	22.6142	22.142	21.8645	22.6115	21.3143	21.5411	21.4354
Q8K4G5	Actin-binding LIM protein 1	Ablim1	0.476029	1	0.187686	1.13894	0.195574	1	2.24626	4.74451	0.175433	1	2.05857	4.16574	0.782404	1	0.0345688	1.02425	0.457463	1	0.234538	1.17653	0.119864	0.358235	3.64245	12.4878	0.138634	1	3.40791	10.6141	0.171028	0.809917	0.459108	1.37469	0.204422	0.205403	3.83245	14.2456	23.025	22.8726	22.3782	22.1829	22.7081	22.6968	21.8501	22.4859	22.3941	22.7774	22.5584
Q8BUE4	Ferroptosis suppressor protein 1	Aifm2	0.446109	1	0.142822	1.10406	0.183344	1	2.38924	5.23882	0.156058	1	2.24642	4.74504	0.532409	1	0.165664	1.12168	0.300085	1	0.277452	1.21205	0.117237	0.340967	3.91104	15.0432	0.139705	1	3.63359	12.4114	0.318226	0.82499	0.352056	1.27638	0.229447	0.290427	3.81998	14.1231	22.8985	22.919	22.9556	22.7467	22.8733	23.0234	22.1482	22.8049	22.8358	22.5744	22.991
Q80YV4	4-phosphopantetheine phosphatase	Pank4	0.437484	1	0.0936401	1.06706	0.190205	1	3.60834	12.1961	0.147674	1	3.5147	11.4296	0.442878	1	4.26708	19.2539	0.745887	1	-0.0466124	0.968207	0.375638	0.469277	2.96651	7.81643	0.368609	1	3.01312	8.0731	0.0491845	0.822831	-0.200243	0.870404	0.79404	0.875496	-1.4542	0.364958	26.1587	25.6686	26.0762	26.0095	25.7927	25.7362	25.9247	26.0556	25.9137	25.9948	17
Q9CR63	Cytochrome c oxidase assembly protein COX16 homolog, mitochondrial	Cox16	0.773351	1	-0.0729088	0.950719	0.188167	1	2.29844	4.91927	0.124878	1	2.37135	5.17426	0.432511	1	2.8984	7.45599	0.915631	1	0.0425803	1.02995	0.326334	0.418081	2.06257	4.1773	0.330813	1	2.01999	4.05581	0.440215	0.857214	0.219014	1.16394	0.851158	0.917976	-0.659396	0.633143	22.584	22.2744	23.3365	22.4758	22.8895	22.8545	23.0053	22.6042	22.3494	17	22.9472
O70572	Sphingomyelin phosphodiesterase 2	Smpd2	0.716999	1	-0.0981215	0.934249	0.0943247	1	3.4142	10.6605	0.0530166	1	3.51232	11.4107	0.00141432	0.993231	5.97042	62.7011	0.826894	1	-0.0907644	0.939025	0.449853	0.564402	1.78283	3.441	0.424161	1	1.87359	3.66443	0.717469	0.949803	-0.10544	0.929521	0.219102	0.238616	-4.20227	0.0543239	22.787	23.6826	22.749	22.5236	22.7456	23.1952	22.8918	23.3928	22.943	17	17
Q61387	Cytochrome c oxidase subunit 7A-related protein, mitochondrial	Cox7a2l	0.262022	1	-0.18414	0.880173	0.197075	1	2.63834	6.22615	0.122554	1	2.82248	7.07378	0.00147405	1	6.6649	101.469	0.137666	1	-0.209684	0.864727	0.548406	0.870285	0.0511856	1.03612	0.0619477	1	0.260869	1.1982	0.341713	0.852444	-0.253605	0.838798	1.22451e-06	0.096	-6.65763	0.00990495	23.4052	23.5803	23.7966	23.7496	23.9211	23.4087	24.0863	23.9008	23.7684	17	17
Q9JLJ5	Elongation of very long chain fatty acids protein 1	Elovl1	0.551545	1	-0.229275	0.853063	0.103258	1	3.69087	12.914	0.0543361	1	3.92014	15.1384	0.279166	0.766728	4.11979	17.3852	0.656832	1	-0.219292	0.858987	0.262083	0.392309	3.56776	11.8577	0.237562	1	3.78705	13.8043	0.507078	0.858949	0.384067	1.30502	0.990715	0.996604	0.0513293	1.03622	23.8553	23.9216	23.1937	22.7269	23.4316	24.3365	22.9225	23.9138	23.6637	22.5286	17
Q9JIF0	Protein arginine N-methyltransferase 1	Prmt1	0.168748	1	-0.234052	0.850244	0.211146	1	2.59527	6.04303	0.128184	1	2.82932	7.10741	0.446373	1	3.43038	10.7807	0.290671	1	-0.102229	0.931593	0.344421	0.437709	2.32639	5.0155	0.325952	1	2.42862	5.38379	0.321811	0.847442	0.295694	1.22748	0.867789	0.934845	-0.706061	0.612991	23.6123	23.527	23.7163	23.7563	23.7386	24.3903	23.6967	23.757	23.8525	24.2681	17
Q8BLF1	Neutral cholesterol ester hydrolase 1	Nceh1	0.95771	1	0.0105597	1.00735	0.214028	1	2.50966	5.69484	0.162015	1	2.4991	5.65331	0.0544928	0.52469	-0.681304	0.623601	0.473407	1	-0.193029	0.874767	0.0894401	0.280561	4.42633	21.501	0.0803465	1	4.61936	24.5791	0.169269	0.812886	-0.403181	0.756189	0.150981	0.151427	4.89749	29.8051	23.5715	23.307	23.1634	23.7362	23.2	23.1841	23.487	23.3644	23.9344	24.0391	23.7077
Q9Z1G3	V-type proton ATPase subunit C 1	Atp6v1c1	0.455304	1	-0.112478	0.924998	0.216231	1	2.2947	4.90653	0.144526	1	2.40718	5.30437	0.000333669	1	6.03511	65.5768	0.496955	1	-0.157775	0.896407	0.533203	0.73981	-0.169215	0.889327	0.964672	1	-0.0114403	0.992102	0.983045	0.998042	-0.00470893	0.996741	0.000157536	0.222143	-6.05126	0.0150796	23.0557	22.5901	22.9425	23.1135	23.1454	22.9248	22.7562	23.2318	23.1314	17	17
P62305	Small nuclear ribonucleoprotein E	Snrpe	0.572227	1	-0.267632	0.830682	0.293814	1	2.62901	6.186	0.192143	1	2.89664	7.44689	0.455498	1	3.94773	15.4307	0.895175	1	-0.0901661	0.939415	0.485052	0.578693	2.10574	4.30419	0.461981	1	2.19591	4.58178	0.196634	0.824017	0.689947	1.61322	0.836407	0.908178	-1.06188	0.479008	24.8611	24.7388	25.2667	23.3956	25.3204	25.1739	23.9326	24.9927	24.7463	17	25.5988
Q80X95;Q6NTA4	Ras-related GTP-binding protein A;Ras-related GTP-binding protein B	Rraga;Rragb	0.247723	1	-0.282954	0.821906	0.204749	1	2.3964	5.26487	0.114224	1	2.67935	6.40569	0.722468	1	0.112854	1.08137	0.551125	1	-0.204254	0.867987	0.0998198	0.265922	4.1861	18.2029	0.088305	1	4.39035	20.9714	0.871524	0.980302	0.0577351	1.04083	0.183061	0.1725	4.33523	20.1853	22.9107	22.8207	23.612	22.9666	23.1215	23.6687	23.3246	23.6884	22.9991	23.2443	23.3202
P26040	Ezrin	Ezr	0.26518	1	-0.308614	0.807417	0.25002	1	2.29729	4.91534	0.145964	1	2.6059	6.08773	0.905184	1	-0.0954199	0.936	0.634681	1	-0.188648	0.877428	0.0987441	0.274082	4.21814	18.6117	0.088636	1	4.40679	21.2117	0.427297	0.851839	0.328902	1.25606	0.156643	0.155936	4.83111	28.4648	23.2151	22.7745	23.667	23.0648	23.8719	23.5007	23.7157	22.8598	23.4968	24.4654	23.0981
Q9R0T7	Peptidase S1 domain-containing protein	Try4	0.241309	1	3.0287	8.16072	0.0995672	1	4.42674	21.5071	0.545722	1	1.39805	2.63544	1.39342e-05	1	6.12919	69.9955	0.183961	1	5.2412	37.8233	0.326864	0.403084	3.48515	11.1979	0.610685	1	-1.75605	0.296058	0.301973	0.787474	3.77678	13.7064	0.234784	0.29665	-4.10846	0.0579738	21.7864	21.6871	29.0619	23.0319	23.1063	23.1521	17	17	24.0572	17	17
Q9DCK3	Tetraspanin-4	Tspan4	0.295724	1	2.43977	5.42554	0.0891772	1	3.70029	12.9986	0.505312	1	1.26052	2.39582	0.981984	1	0.100066	1.07182	0.488828	1	2.25922	4.78734	0.117779	0.325269	4.29338	19.6081	0.373901	1	2.03416	4.09583	0.829135	0.952448	0.792106	1.7316	0.272228	0.370204	2.7262	6.61709	23.2829	23.8568	17	23.0233	17	22.6525	17	23.1025	17	22.4524	17
Q8BGC0	HIV Tat-specific factor 1 homolog	Htatsf1	0.315055	1	2.06068	4.17184	0.115265	1	3.09391	8.53809	0.553069	1	1.03323	2.0466	0.990938	1	-0.0478277	0.967392	0.512621	1	1.78943	3.45678	0.116167	0.346578	3.54336	11.6589	0.373901	1	1.75394	3.37278	0.792005	0.942994	0.86081	1.81606	0.272228	0.372366	2.66257	6.33162	23.0057	17	22.3747	22.2554	17	22.2295	17	22.2618	17	17	22.3251
O55229	Choline/ethanolamine kinase	Chkb	0.330224	1	1.85249	3.61123	0.132056	1	2.78074	6.87204	0.577214	1	0.928248	1.90296	0.42265	1	-2.61238	0.163529	0.952488	1	0.150927	1.11028	0.116311	0.352431	3.43959	10.8498	0.116156	1	3.28867	9.77209	0.219154	0.568993	-3.28867	0.102332	0.272228	0.372077	2.61238	6.11512	21.984	22.2736	22.0452	17	17	17	17	21.8838	21.9822	17	22.2248
Q91VC9	Growth hormone-inducible transmembrane protein	Ghitm	0.454417	1	1.60901	3.05041	0.0941508	1	2.84579	7.18901	0.346594	1	1.23679	2.35673	NaN	1	0	1	0.574404	1	1.73308	3.32436	0.123629	0.369509	3.79439	13.8748	0.373901	1	2.06131	4.17366	0.495025	0.818355	-2.06131	0.239598	NaN	1	0	1	17	23.4767	21.9065	17	17	17	17	23.1839	17	17	17
Q9Z0K8	Pantetheinase	Vnn1	0.408158	1	1.45505	2.74166	0.0789797	1	4.2712	19.3089	0.261943	1	2.81615	7.04278	0.477438	1	3.36511	10.3038	0.368296	1	2.46382	5.51677	0.109419	0.283354	4.91399	30.148	0.510127	1	2.45017	5.4648	0.495881	0.821958	2.41407	5.32976	0.745866	0.828902	1.49913	2.82672	24.1215	24.395	23.7968	24.6904	24.4005	24.088	17	24.0547	24.4359	17	24.7584
Q9CWM4	Prefoldin subunit 1	Pfdn1	0.33154	1	1.42375	2.68282	0.136916	1	2.7269	6.62033	0.504108	1	1.30315	2.46768	0.440112	1	-2.97128	0.127513	0.0820955	1	0.429572	1.34683	0.05803	0.244457	4.58235	23.9565	0.0754652	1	4.15277	17.7873	0.317574	0.821972	-2.77902	0.14569	0.14781	0.152431	4.34503	20.3228	22.8481	23.148	23.2224	23.583	17	23.2184	22.6737	23.1185	22.8725	23.0989	23.062
Q9DBJ3	Brain-specific angiogenesis inhibitor 1-associated protein 2-like protein 1	Baiap2l1	0.388972	1	1.41674	2.66981	0.091773	1	2.29704	4.91448	0.346594	1	0.880301	1.84076	0.42265	1	2.20075	4.59719	0.373901	1	1.68323	3.21147	0.373901	0.524823	1.68323	3.21147	NaN	1	0	1	0.272228	0.770516	2.20075	4.59719	NaN	1	0	1	21.1385	17	17	22.0497	17	21.4015	17	17	17	17	17
Q8VEH5	EPM2A-interacting protein 1	Epm2aip1	0.315234	1	1.39863	2.63651	0.0929715	1	2.78521	6.89337	0.436097	1	1.38658	2.61458	0.971576	1	0.164226	1.12056	0.504262	1	0.314695	1.24375	0.196669	0.37894	2.51618	5.72065	0.255524	1	2.20148	4.59952	0.361132	0.797864	-2.43806	0.184531	0.900609	0.952762	-0.400806	0.757435	23.1562	22.3797	22.7517	23.0326	22.9372	17	21.7368	23.0722	22.4109	17	22.6087
P70318;P52912	Nucleolysin TIAR;Nucleolysin TIA-1	Tial1;Tia1	0.414734	1	1.34824	2.54601	0.167931	1	2.83489	7.1349	0.502042	1	1.48666	2.80238	0.402064	0.992785	3.53938	11.6268	0.396836	1	2.12782	4.37058	0.362545	0.462696	2.24599	4.74364	0.971685	1	0.11817	1.08536	0.465673	0.817622	2.41193	5.32186	0.806183	0.887166	-1.00928	0.496794	24.3507	23.7351	23.738	23.3568	23.9361	23.8521	23.7465	23.6999	17	17	23.7094
Q8BI72	CDKN2A-interacting protein	Cdkn2aip	0.410297	1	1.34819	2.54593	0.186503	1	2.73184	6.64301	0.532635	1	1.38365	2.60927	0.927904	1	-0.0404453	0.972355	0.378796	1	2.1619	4.47505	0.0911668	0.281655	4.49494	22.5483	0.477717	1	2.33304	5.03866	0.438116	0.820481	2.52151	5.74183	0.159628	0.158372	4.89499	29.7536	24.3031	23.6597	23.4491	23.4619	24.1131	23.6533	23.2917	23.7933	17	23.6016	24.2456
Q9R060	Cytosolic Fe-S cluster assembly factor NUBP1	Nubp1	0.409175	1	1.31034	2.48	0.191216	1	2.6334	6.20487	0.541138	1	1.32306	2.50196	0.00100929	1	6.41523	85.3445	0.385862	1	2.17201	4.5065	0.628363	0.825996	0.100292	1.07199	0.406924	1	-2.07172	0.237877	0.547035	0.84987	1.95244	3.87028	7.86784e-05	0.185	-6.5345	0.0107874	23.312	23.7949	23.4686	23.6409	23.6192	23.2113	23.6947	23.6937	17	17	17
P05367	Serum amyloid A-2 protein	Saa2	0.62397	1	1.26557	2.40422	0.162005	1	2.96655	7.81665	0.542531	1	1.70098	3.25122	NaN	1	0	1	0.103837	1	-2.00901	0.248444	0.636158	0.70451	0.82596	1.77271	0.137846	1	2.83497	7.13526	0.00134706	0.722353	-8.6099	0.00255953	0.0513755	0.131485	-5.77494	0.0182629	22.9234	24.3052	24.4321	22.0654	17	17	25.2872	26.7196	24.8229	17	17
Q9WV60;Q2NL51	Glycogen synthase kinase-3 beta;Glycogen synthase kinase-3 alpha	Gsk3b;Gsk3a	0.48384	1	1.25436	2.38562	0.0909167	1	4.14195	17.6543	0.261321	1	2.88759	7.40032	0.66657	1	-0.344238	0.787724	0.433274	1	2.19675	4.58444	6.26487e-08	0	7.23888	151.05	0.116343	1	5.04214	32.9484	0.550084	0.849303	2.20616	4.61445	0.000101864	0.189391	7.59254	193.011	23.9992	24.2447	24.3627	24.1093	23.6655	24.8311	24.7435	17	24.3829	24.9586	24.2265
Q9DBT5	AMP deaminase 2	Ampd2	0.418589	1	1.20616	2.30723	0.06314	1	3.71386	13.1215	0.230498	1	2.50769	5.68711	0.420328	1	3.17638	9.04035	0.338799	1	2.1719	4.50615	0.0935362	0.26197	4.2338	18.8149	0.499539	1	2.06191	4.17537	0.432884	0.825215	2.33597	5.04889	0.74505	0.830123	1.22149	2.33188	23.0397	23.174	23.2486	23.0726	23.1601	23.4981	23.2048	22.7747	17	17	23.3055
Q99KH8;Q99JT2;Q9Z2W1	Serine/threonine-protein kinase 24;Serine/threonine-protein kinase 26	Stk24;Stk26	0.389263	1	1.19596	2.29097	0.0749646	1	3.42639	10.7509	0.261586	1	2.23043	4.69275	0.000454528	1	5.77318	54.6889	0.359287	1	1.96863	3.91396	0.403319	0.547051	1.83724	3.57325	0.964008	1	-0.131392	0.91295	0.481305	0.823009	1.97046	3.91892	0.219145	0.247215	-3.93411	0.0654207	22.8334	22.8282	22.6936	22.7922	22.8963	22.6501	22.8076	22.6005	17	17	17
O88291	DBIRD complex subunit ZNF326	Znf326	0.395272	1	1.19035	2.28207	0.179457	1	2.37246	5.17824	0.533565	1	1.18212	2.26909	0.777651	1	-0.0843248	0.943226	0.387469	1	1.87809	3.67589	0.101086	0.279268	3.9045	14.9752	0.489962	1	2.02641	4.0739	0.510316	0.83778	1.86655	3.6466	0.192344	0.185459	3.97729	15.7501	22.9771	22.6001	22.6915	22.9333	22.494	22.9662	17	23.0134	22.5772	22.7021	22.9267
Q8VHL5	Gamma-crystallin N	Crygn	0.406989	1	1.15569	2.22791	0.172781	1	2.37693	5.1943	0.5097	1	1.22124	2.33147	0.42265	1	2.76215	6.78407	0.534609	1	0.206982	1.15427	0.435517	0.634352	0.400944	1.32037	0.632897	1	0.193962	1.1439	0.250803	0.639475	-2.92823	0.131376	0.00132535	0.297789	-5.49641	0.0221521	22.007	22.9996	22.3546	23.338	17	22.5243	22.5607	22.8851	22.6254	17	17
Q99JY8	Phospholipid phosphatase 3	Plpp3	0.450867	1	1.12149	2.17571	0.0646085	1	3.61092	12.2179	0.221622	1	2.48943	5.61557	0.42265	1	2.91865	7.5614	0.114706	1	-0.464405	0.72477	0.423219	0.558642	1.73888	3.33776	0.324376	1	2.20329	4.60527	0.242624	0.621478	-3.18381	0.110047	0.219184	0.2491	-3.89917	0.0670242	23.8875	22.7624	22.5176	22.6341	17	22.8373	23.5388	22.9314	22.8371	17	17
Q9CY97	RNA polymerase II subunit A C-terminal domain phosphatase SSU72	Ssu72	0.445483	1	1.11724	2.16931	0.101509	1	3.3882	10.47	0.287685	1	2.27096	4.82644	0.982311	1	-0.110744	0.926111	0.896214	1	0.0224317	1.01567	0.150608	0.383388	3.88119	14.7352	0.151708	1	3.85876	14.5078	0.286228	0.773233	-2.96624	0.12796	0.802995	0.885134	1.00327	2.00453	22.6959	23.0835	22.7852	23.3193	23.148	17	22.9475	23.0963	23.0768	17	23.3695
Q9CY62	E3 ubiquitin-protein ligase RNF181	Rnf181	0.499961	1	1.05165	2.0729	0.198072	1	2.48102	5.58293	0.498238	1	1.42937	2.69329	0.375641	0.922846	3.29024	9.78273	0.494926	1	1.68982	3.22616	0.434492	0.561876	1.87861	3.6772	0.954663	1	0.188789	1.13981	0.601213	0.858098	1.69443	3.23648	0.716994	0.800304	-1.40702	0.377089	23.3467	23.3922	23.1485	23.024	23.4105	22.9751	23.6257	23.8696	17	17	22.8052
P05366	Serum amyloid A-1 protein	Saa1	0.652179	1	0.995568	1.99386	0.157986	1	3.43683	10.829	0.386428	1	2.44126	5.43118	0.42265	1	3.27066	9.65089	0.0437694	1	-1.42915	0.37135	0.595395	0.70137	0.459187	1.37477	0.0892021	1	1.88833	3.70207	0.0874711	0.318957	-6.23765	0.013252	0.0041821	0.253714	-7.61997	0.00508346	24.7978	25.1173	25.5525	24.5677	23.5413	17	26.3913	27.253	25.8807	17	17
Q3UDW8	Heparan-alpha-glucosaminide N-acetyltransferase	Hgsnat	0.68026	1	0.945537	1.9259	0.14816	1	3.32044	9.98966	0.275075	1	2.3749	5.18699	0.927385	1	-0.455861	0.729075	0.976122	1	-0.0949663	0.936294	0.116375	0.332892	4.16711	17.9649	0.116201	1	4.26207	19.1872	0.721831	0.900949	-1.36769	0.387512	0.272228	0.3576	3.35025	10.1982	23.1408	23.0912	23.4102	17	22.7888	17	23.3001	23.4862	17	17	23.7005
P0C0A3	Charged multivesicular body protein 6	Chmp6	0.566976	1	0.882615	1.84371	0.0706328	1	3.59047	12.0459	0.204598	1	2.70785	6.53348	0.417457	1	3.16681	8.98059	0.477762	1	1.71912	3.29235	0.10275	0.279855	4.121	17.3998	0.456728	1	2.40188	5.28491	0.538297	0.851302	1.95146	3.86766	0.751397	0.835565	1.18653	2.27605	22.8351	23.5763	22.7578	22.8423	23.2755	23.3067	17	23.9099	23.1091	17	23.2487
Q8VED9	Galectin-related protein	Lgalsl	0.765295	1	0.633343	1.55116	0.114579	1	3.09108	8.52135	0.207957	1	2.45774	5.49355	0.000193872	1	6.09296	68.2596	0.108492	1	3.73205	13.288	0.101502	0.284	3.76631	13.6073	0.989866	1	0.0342598	1.02403	0.164287	0.439563	4.28303	19.4679	0.495025	0.5761	-1.77567	0.292058	17	22.4676	22.4456	22.7128	23.1778	23.0081	17	22.4298	17	17	17
Q91XV3	Brain acid soluble protein 1	Basp1	0.775999	1	0.599122	1.51479	0.166962	1	2.85053	7.21265	0.265792	1	2.25141	4.76147	0.993531	1	0.0399199	1.02806	0.421614	1	1.70992	3.27144	0.000156739	0.400889	5.43566	43.2808	0.117273	1	3.72573	13.2299	0.864735	0.965046	-0.620279	0.650545	0.272228	0.364706	3.06553	8.37178	17	21.7346	23.0899	22.4824	17	23.2109	17	22.2871	22.8901	23.1311	17
Q9JI39	ATP-binding cassette sub-family B member 10, mitochondrial	Abcb10	0.0996178	1	0.527332	1.44126	0.476328	1	1.34506	2.5404	0.618067	1	0.817724	1.76262	0.481017	1	3.07893	8.44986	0.429204	1	0.297527	1.22904	0.321259	0.579634	-0.392218	0.761957	0.0254546	1	-0.689744	0.619964	0.0407431	0.450547	-0.636315	0.643354	0.198624	0.190014	-4.40499	0.0472027	24.4983	24.9026	23.9718	24.917	23.7649	23.5617	24.4191	24.4398	24.0399	17	24.1688
Q9D711	Pirin	Pir	0.191963	1	-0.212644	0.862954	0.461725	1	1.28058	2.42937	0.333637	1	1.49322	2.81517	0.799144	1	0.0802488	1.0572	0.34727	1	-0.193069	0.874743	0.407134	0.543493	2.24214	4.73097	0.371154	1	2.43521	5.40842	0.894951	0.98245	0.0329914	1.02313	0.500025	0.570045	2.38795	5.23413	24.0365	23.9272	24.3725	23.8863	24.0254	24.5507	24.4415	24.1653	24.1585	24.295	24.1207
O88532	Zinc finger RNA-binding protein	Zfr	0.135179	1	-0.36848	0.774598	0.503817	1	1.56529	2.95936	0.352805	1	1.93377	3.82052	0.739652	1	-0.331473	0.794724	0.370899	1	-0.349883	0.784648	0.373438	0.46266	3.09405	8.53887	0.327893	1	3.44393	10.8824	0.803349	0.966068	0.0912393	1.06528	0.408227	0.457093	3.86664	14.5873	26.3207	26.4805	26.4808	25.7861	26.7272	26.6534	26.0952	26.9557	26.7461	27.8902	26.1533
Q8BYM8	Probable cysteine--tRNA ligase, mitochondrial	Cars2	0.0093717	1	-0.385162	0.765693	0.479026	1	1.05069	2.07151	0.280365	1	1.43585	2.70541	0.974227	1	0.00265121	1.00184	0.0430804	1	-0.458647	0.727668	0.393529	0.536603	1.93266	3.8176	0.302851	1	2.39131	5.24634	0.500114	0.91425	-0.123861	0.917728	0.44914	0.488377	2.2648	4.80587	23.0602	22.7642	23.1061	23.023	23.3713	23.227	23.2432	23.3797	23.6463	23.2874	23.3056
O88990	Alpha-actinin-3	Actn3	0.505785	1	2.40397	5.29258	0.409862	1	3.45691	10.9808	0.748593	1	1.05294	2.07475	0.378258	0.929876	-5.15117	0.0281413	0.411384	1	4.01148	16.1279	0.031484	0.3068	9.20049	588.334	0.194941	1	5.18901	36.4793	0.71608	0.89551	-1.73152	0.301134	0.0847754	0.134261	8.60865	390.357	17	20.8157	30.4257	27.36	19.8605	21.0544	21.1482	17	28.4188	30.1581	21.0592
Q99NB1	Acetyl-coenzyme A synthetase 2-like, mitochondrial	Acss1	0.556619	1	1.71189	3.2759	0.236358	1	3.24058	9.45174	0.590726	1	1.52869	2.88523	0.42265	1	-4.44935	0.0457734	0.702516	1	1.17972	2.26532	1.56524e-05	0.285714	6.69376	103.519	0.126261	1	5.51404	45.6974	0.23237	0.570249	-5.51404	0.0218831	0.272228	0.344344	4.44935	21.8467	17	23.5312	24.2205	23.3295	17	17	17	23.9435	26.5986	25.8987	17
P56375	Acylphosphatase-2	Acyp2	0.584077	1	1.53805	2.90402	0.387065	1	2.54159	5.82229	0.707427	1	1.00353	2.00491	0.339237	0.834573	-4.46387	0.0453149	0.82462	1	0.932554	1.90865	0.116686	0.308684	5.58103	47.8692	0.169647	1	4.64847	25.0801	0.588783	0.859442	-2.39095	0.190657	0.0479527	0.138179	6.72139	105.521	21.1775	17	25.6884	25.0547	17	21.515	17	21.3355	26.6099	26.507	20.9357
Q61043	Ninein	Nin	0.397987	1	1.42997	2.69441	0.213809	1	2.71302	6.55693	0.582422	1	1.28305	2.43353	0.448394	1	-3.48034	0.089601	0.508199	1	0.121168	1.08761	0.121493	0.345548	4.57981	23.9144	0.129437	1	4.45864	21.988	0.349705	0.818876	-3.07302	0.118831	0.204951	0.194738	4.86597	29.161	24.2333	23.8637	24.0508	23.8302	24.4415	17	24.0842	23.5698	23.7272	24.268	24.1341
Q61074	Protein phosphatase 1G	Ppm1g	0.391356	1	1.25206	2.38181	0.202384	1	2.40245	5.28701	0.567029	1	1.15039	2.21974	0.831435	1	0.172623	1.12711	0.293373	1	2.30868	4.95429	0.110347	0.311193	4.11092	17.2786	0.550341	1	1.80224	3.4876	0.39128	0.832046	2.45898	5.49826	0.219668	0.242335	4.08859	17.0133	22.8249	23.3422	23.1263	22.8825	23.1981	23.3365	17	22.8396	22.5854	22.3843	23.8051
Q6PHN9	Ras-related protein Rab-35	Rab35	0.442133	1	1.23286	2.35032	0.216416	1	2.52613	5.76025	0.556452	1	1.29327	2.45084	0.962869	1	0.0127974	1.00891	0.356821	1	2.29214	4.89784	0.118468	0.328699	4.43907	21.6917	0.531616	1	2.14693	4.42883	0.481958	0.823799	2.2765	4.845	0.224799	0.259984	4.41063	21.2682	23.0823	23.7866	23.7028	23.5419	23.5284	23.7945	17	23.9231	23.2318	23.8526	23.4447
O08528	Hexokinase-2	Hk2	0.650057	1	1.22526	2.33797	0.364623	1	2.90351	7.48242	0.575794	1	1.67825	3.20039	0.681229	1	-2.95016	0.129394	0.504885	1	2.09713	4.27859	0.000936158	0.4152	6.86099	116.242	0.15905	1	4.76385	27.1683	0.640398	0.856061	-2.10842	0.2319	0.272228	0.33514	5.60559	48.6912	17	22.6163	25.307	23.6596	17	22.3109	21.7417	17	26.5498	28.2112	17
Q922P9	Putative oxidoreductase GLYR1	Glyr1	0.428912	1	1.06406	2.0908	0.265529	1	1.98165	3.94945	0.627537	1	0.917593	1.88896	0.447467	1	2.7406	6.68347	0.380353	1	1.78624	3.44916	0.492884	0.589556	1.4885	2.80597	0.916642	1	-0.297744	0.813523	0.442322	0.813797	2.06124	4.17345	0.789302	0.876162	-0.977102	0.507999	22.795	22.1797	22.6865	22.291	22.7963	22.5252	22.1239	22.6746	17	17	22.8403
A2ASZ8	Calcium-binding mitochondrial carrier protein SCaMC-2	Slc25a25	0.695503	1	1.06228	2.08823	0.341886	1	2.61177	6.11253	0.555576	1	1.54949	2.92714	0.454338	1	3.44288	10.8745	0.53786	1	2.41082	5.31776	0.469726	0.565134	2.69805	6.48924	0.937425	1	0.287231	1.2203	0.258839	0.633164	4.61099	24.4369	0.743491	0.827298	1.45534	2.74221	23.9644	24.7515	24.1914	17	24.1174	24.2448	17	24.7104	17	17	24.4765
Q9CQB2	MAPK regulated corepressor interacting protein 2	Mcrip2	0.68005	1	0.954935	1.93849	0.300816	1	2.37774	5.1972	0.51672	1	1.4228	2.68105	0.00156065	0.922286	6.2997	78.7771	0.109389	1	4.22181	18.6591	0.286843	0.38907	2.39334	5.25372	0.553822	1	-1.82847	0.281563	0.209095	0.487019	4.24331	18.9392	0.220239	0.253072	-3.88487	0.0676921	17	23.2723	23.1958	23.3665	23.5489	23.0505	23.1692	17	17	17	17
E9Q3H6	Polyketide_cyc domain-containing protein	Coq10a	0.687469	1	0.941214	1.92014	0.261999	1	2.68377	6.42531	0.457884	1	1.74255	3.34626	0.42265	1	-3.88896	0.0675006	0.652635	1	-1.28578	0.41015	0.11751	0.328218	4.21111	18.5213	0.0259181	0.798222	5.49689	45.1574	0.0752528	0.310905	-5.49689	0.0221448	0.272228	0.348602	3.88896	14.8147	21.3241	17	23.6908	22.9425	17	17	20.7985	21.0164	25.6757	24.7779	17
Q8BVU5	ADP-ribose pyrophosphatase, mitochondrial	Nudt9	0.543312	1	0.893688	1.85792	0.2143	1	2.25087	4.75971	0.496061	1	1.35719	2.56185	0.528998	1	0.189977	1.14075	0.380908	1	1.92577	3.79941	0.0825495	0.264815	4.0611	16.6922	0.461902	1	2.13532	4.39336	0.397847	0.834508	2.48218	5.5874	0.146601	0.151725	4.42753	21.5188	22.6614	22.5512	23.0009	22.9025	23.5308	23.2185	17	23.1139	22.5634	22.9874	23.3819
Q9D666	SUN domain-containing protein 1	Sun1	0.805473	1	0.811478	1.75501	0.411364	1	2.50458	5.67485	0.544694	1	1.6931	3.23352	0.42265	1	4.24681	18.9853	0.988058	1	0.0640481	1.04539	0.989821	0.99105	0.0546799	1.03863	0.998236	1	-0.00936826	0.993527	0.785224	0.937569	1.4348	2.70345	0.495025	0.54753	-2.82138	0.141475	25.1615	25.6282	17	17	25.4936	17	25.436	17	17	17	17
Q9D0K2	Succinyl-CoA:3-ketoacid coenzyme A transferase 1, mitochondrial	Oxct1	0.817231	1	0.775156	1.71137	0.608655	1	1.79402	3.46779	0.73888	1	1.01886	2.02632	0.630577	1	-2.79117	0.144469	0.753269	1	1.6655	3.17224	0.204514	0.381293	5.22438	37.3848	0.391004	1	3.55888	11.785	0.938166	0.982295	-0.399444	0.75815	0.210892	0.195352	5.9506	61.8458	19.5282	17	27.2548	26.9311	22.6829	20.6445	17	20.1006	29.0889	29.3137	19.596
P21844	Chymase	Cma1	0.793749	1	0.639272	1.55754	0.507274	1	1.62616	3.0869	0.657752	1	0.986887	1.9819	0.865437	1	-0.904815	0.534101	0.564995	1	1.9218	3.78895	0.116443	0.333886	4.16982	17.9987	0.373901	1	2.24802	4.75031	0.878055	0.973521	0.60018	1.51591	0.272228	0.349149	3.75302	13.4825	17	17	23.434	23.0754	22.6964	17	17	17	23.7441	24.506	17
Q8R0G9	Nuclear pore complex protein Nup133	Nup133	0.818121	1	0.488331	1.40282	0.388635	1	1.65157	3.14176	0.512424	1	1.16324	2.2396	NaN	1	0	1	0.976194	1	-0.081309	0.9452	0.496342	0.586366	1.85743	3.62361	0.483736	1	1.93874	3.8337	0.219147	0.560437	-3.66209	0.0789954	0.495025	0.577463	-1.72335	0.302845	17	17	22.359	22.3833	17	17	22.5437	22.4425	17	17	17
Q9Z266	SNARE-associated protein Snapin	Snapin	0.850471	1	0.395175	1.3151	0.442483	1	1.48497	2.79912	0.550628	1	1.0898	2.12844	0.42265	1	2.65039	6.27838	0.577323	1	1.55978	2.9481	0.56055	0.636759	1.60919	3.0508	0.986055	1	0.0494048	1.03484	0.827942	0.951934	0.747104	1.67842	0.495025	0.573659	-1.85388	0.276647	17	22.0402	22.3491	17	17	22.3008	22.7099	17	17	17	17
P06684	Complement C5	C5	0.372254	1	0.336412	1.26261	0.481025	1	1.22066	2.33053	0.55954	1	0.884245	1.8458	0.50787	1	2.7339	6.65249	0.503556	1	-0.206562	0.8666	0.0424546	0.380761	-0.555417	0.68046	0.294121	1	-0.348855	0.785207	0.126927	0.606374	-0.749978	0.594613	0.23	0.290693	-3.83273	0.0701833	24.663	23.8521	23.4448	23.7763	23.3468	22.9485	23.5349	23.7758	24.3821	23.8275	17
B2RX12	Canalicular multispecific organic anion transporter 2	Abcc3	0.327864	1	0.327146	1.25453	0.359282	1	1.44439	2.72148	0.416426	1	1.11725	2.16933	0.602315	1	2.36783	5.16163	0.0863945	1	0.620153	1.53704	0.0231955	0.266188	0.903681	1.87083	0.256595	1	0.283527	1.21717	0.5463	0.864229	0.313984	1.24314	0.579147	0.670491	-1.77032	0.293145	22.8282	23.4767	23.1356	23.8813	23.7393	22.6441	23.1607	22.5753	22.8972	17	24.6477
Q61285	ATP-binding cassette sub-family D member 2	Abcd2	0.891494	1	0.266036	1.2025	0.295725	1	2.57566	5.96142	0.39832	1	2.30962	4.95753	0.716929	1	0.538976	1.45294	0.248524	1	2.41592	5.33661	9.77252e-05	0.3785	5.90597	59.9619	0.116881	1	3.49005	11.2359	0.123688	0.349582	5.20418	36.8651	1.96358e-05	0.118	8.15526	285.087	22.6331	23.4625	22.1853	23.0702	24.423	26.9654	17	22.4647	22.0055	24.9284	25.3822
Q8WTY4	Anamorsin	Ciapin1	0.383391	1	0.260362	1.19778	0.474617	1	1.35516	2.55825	0.512723	1	1.09479	2.13583	0.469312	1	3.37885	10.4024	0.738426	1	0.149582	1.10925	0.165168	0.56455	-0.278325	0.824548	0.364628	1	-0.427907	0.74334	0.546501	0.857092	-0.353601	0.782628	0.240166	0.303449	-4.16035	0.0559254	24.5745	24.4764	24.859	24.756	24.2676	24.1203	25.3428	24.2507	24.0492	17	24.6302
Q9EPB5	Serine hydrolase-like protein	Serhl	0.570636	1	0.250957	1.19	0.312992	1	1.55597	2.94031	0.332965	1	1.30501	2.47086	0.8132	1	0.0703926	1.05	0.733259	1	0.223542	1.1676	0.310699	0.398769	2.35163	5.10401	0.355798	1	2.12809	4.37138	0.629071	0.887004	0.329661	1.25672	0.421205	0.469289	2.38736	5.23198	23.9516	22.557	23.9294	23.4571	23.6313	23.2099	23.2468	22.227	23.7992	23.5055	23.1949
Q9QXN3	Activating signal cointegrator 1	Trip4	0.905413	1	0.249035	1.18841	0.427506	1	1.4623	2.75547	0.504258	1	1.21326	2.31862	NaN	1	0	1	0.875834	1	-0.420211	0.747316	0.542854	0.629855	1.6019	3.03542	0.475327	1	2.02211	4.06176	0.221147	0.566986	-3.76128	0.0737464	0.495025	0.577822	-1.73918	0.29954	17	22.0088	22.0144	17	17	17	17	22.9939	22.2899	17	17
Q9D1I6	39S ribosomal protein L14, mitochondrial	Mrpl14	0.263615	1	0.236673	1.17827	0.398162	1	1.39067	2.622	0.423533	1	1.154	2.22529	0.471115	1	3.10679	8.61465	0.458688	1	0.253506	1.1921	0.632487	0.818815	0.105637	1.07597	0.643985	1	-0.147869	0.902583	0.821833	0.974701	0.0847448	1.0605	0.31491	0.393324	-3.16992	0.111112	23.8688	23.6621	24.1151	23.6244	23.6714	23.5922	23.0353	23.9307	23.6752	17	24.05
E9Q3P4	Centromere protein F	Cenpf	0.705559	1	0.236284	1.17796	0.249298	1	2.66845	6.35747	0.239083	1	2.43217	5.39704	0.732978	1	-0.581384	0.668322	0.112728	1	-0.196631	0.872586	0.181904	0.384938	4.24457	18.9558	0.166423	1	4.4412	21.7238	0.821629	0.957864	-0.265182	0.832094	0.256522	0.316295	4.7574	27.0471	25.1807	23.8476	24.045	23.7275	25.2508	22.3588	24.0589	24.0259	24.1253	24.054	24.7184
Q7TPD7	Leucine-rich repeat-containing protein 75B	Lrrc75b	0.296495	1	0.231807	1.1743	0.336976	1	1.65043	3.13927	0.344361	1	1.41862	2.6733	0.326638	1	-0.24846	0.841795	0.193865	1	0.364891	1.28778	0.269994	0.387618	2.8949	7.43792	0.328153	1	2.53001	5.77575	0.810781	0.974518	-0.0762879	0.948495	0.423586	0.468053	2.70218	6.50785	23.7052	24.3408	24.4724	24.2657	23.9054	23.9316	23.9583	23.6228	24.4032	24.3594	23.9745
Q9CRA5	Golgi phosphoprotein 3	Golph3	0.621992	1	0.22398	1.16795	0.31673	1	1.28794	2.4418	0.314094	1	1.06396	2.09067	0.0735995	0.530839	0.754251	1.68676	0.295184	1	-0.313905	0.804461	0.625054	0.690373	0.956535	1.94064	0.518504	1	1.27044	2.41235	0.305744	0.854635	-0.223986	0.856196	0.907656	0.958977	0.292204	1.22451	23.3081	21.9797	21.1816	21.3836	21.7708	21.439	21.6439	21.8419	22.0009	20.7111	20.9902
Q3URS9	Mitochondrial potassium channel	Ccdc51	0.454203	1	0.220341	1.16501	0.526587	1	1.04993	2.07043	0.572155	1	0.829586	1.77718	0.431619	1	3.14548	8.84877	0.546885	1	0.250258	1.18942	0.504873	0.657067	-0.464082	0.724932	0.38703	1	-0.71434	0.609484	0.673198	0.915883	0.251811	1.1907	0.248211	0.31463	-3.60801	0.0820129	23.6315	23.4345	23.2671	23.343	23.6637	23.0358	23.5558	23.3893	22.3488	17	23.4086
Q6PD03	Serine/threonine-protein phosphatase 2A 56 kDa regulatory subunit alpha isoform	Ppp2r5a	0.321873	1	0.190209	1.14093	0.361578	1	1.29302	2.4504	0.373682	1	1.10281	2.14772	0.356038	1	0.0587397	1.04156	0.0590932	1	0.44984	1.36589	0.30139	0.393263	2.24869	4.75252	0.396366	1	1.79885	3.47943	0.0666157	0.765216	0.424284	1.34191	0.440861	0.486845	2.1644	4.48279	22.6675	22.8027	23.2521	23.0269	23.0509	22.9524	22.7367	22.6363	22.3591	22.9401	22.9457
P43137	Lithostathine-1	Reg1	0.917428	1	0.185362	1.1371	0.292352	1	1.31499	2.488	0.346594	1	1.12962	2.18802	NaN	1	0	1	0.962299	1	-0.129392	0.914217	0.373901	0.523513	1.75331	3.37132	0.373901	1	1.88271	3.68766	0.495025	0.823719	-1.88271	0.271174	NaN	1	0	1	17	22.2599	17	17	17	17	17	22.6481	17	17	17
P01592	Immunoglobulin J chain	Jchain	0.603606	1	0.159089	1.11658	0.548513	1	0.97778	1.96943	0.572106	1	0.81869	1.7638	0.320721	1	-0.697199	0.616769	0.785615	1	0.106926	1.07693	0.43118	0.559597	1.93621	3.82699	0.460601	1	1.82928	3.55361	0.956636	0.989024	0.0350199	1.02457	0.436796	0.477581	2.5615	5.90322	23.6251	23.3684	23.2805	23.4324	23.772	22.805	22.8755	22.9017	23.9833	24.2091	23.7623
Q07813	Apoptosis regulator BAX	Bax	0.333661	1	0.153539	1.1123	0.343244	1	1.59616	3.02338	0.328618	1	1.44263	2.71815	0.497837	1	0.161416	1.11838	0.278365	1	0.224367	1.16826	0.330301	0.421716	2.52113	5.74032	0.370318	1	2.29676	4.91355	0.179976	0.813434	0.304829	1.23527	0.46727	0.505823	2.44018	5.42708	24.2731	24.1775	24.2004	23.8282	24.1993	24.0991	23.8972	24.0428	23.5931	23.7977	24.1778
Q9CWE0	Mitochondrial fission regulator 1-like	Mtfr1l	0.366929	1	0.145728	1.10629	0.382775	1	1.40787	2.65346	0.372479	1	1.26215	2.39852	0.472194	1	3.06777	8.38474	0.46626	1	0.186137	1.13771	0.0951936	0.562312	0.244537	1.18471	0.787652	1	0.0584005	1.04131	0.917129	0.984616	-0.029562	0.979718	0.327206	0.400031	-3.03893	0.121672	23.5653	23.922	23.5547	23.8461	23.5534	23.5637	23.4025	23.9927	23.3692	17	23.9816
Q8C0D5	Elongation factor-like GTPase 1	Efl1	0.714243	1	0.130334	1.09455	0.441867	1	1.49915	2.82676	0.416001	1	1.36882	2.58259	0.45519	1	3.71182	13.1029	0.0701349	1	0.497133	1.41141	0.203306	0.563081	0.303951	1.23452	0.244701	1	-0.193182	0.874674	0.928191	0.988236	0.0131912	1.00919	0.287067	0.372435	-3.89181	0.0673673	23.7894	25.3391	24.8949	25.4723	24.7833	24.7197	24.534	24.8215	24.8594	17	25.0794
O70585;Q9D2N4	Dystrobrevin beta;Dystrobrevin alpha	Dtnb;Dtna	0.738986	1	0.127745	1.09258	0.314389	1	1.64916	3.13652	0.291009	1	1.52142	2.87073	0.392897	0.980399	3.4581	10.9898	0.796063	1	-0.128495	0.914785	0.789769	0.87071	0.101804	1.07311	0.493614	1	0.230299	1.17308	0.599513	0.879793	-0.314177	0.80431	0.230029	0.295595	-3.54198	0.0858536	24.3281	23.394	23.5134	24.51	23.1251	24.1151	23.895	24.4761	23.4319	17	23.324
P09803	Cadherin-1	Cdh1	0.253078	1	0.110987	1.07997	0.294349	1	1.39896	2.63712	0.270331	1	1.28797	2.44185	0.0342192	0.710202	0.407662	1.32653	0.237701	1	0.151514	1.11073	0.334134	0.426801	2.02636	4.07377	0.366666	1	1.87485	3.66763	0.0358627	0.836989	0.17126	1.12604	0.540676	0.630989	1.63845	3.1133	22.8239	22.5492	22.9183	22.6686	22.671	22.7925	22.5403	22.5717	22.5695	22.3721	22.2761
Q925N0	Sideroflexin-5	Sfxn5	0.565353	1	0.106285	1.07645	0.432884	1	1.46769	2.76578	0.407521	1	1.3614	2.56935	0.449711	1	3.68706	12.88	0.785474	1	0.0682615	1.04845	0.442912	0.753885	-0.120777	0.919692	0.401881	1	-0.189039	0.87719	0.699997	0.943545	0.117496	1.08485	0.291978	0.377462	-3.75861	0.0738834	24.9307	24.8469	24.5118	24.4132	24.7972	24.4825	24.1806	24.8536	24.5329	17	24.9056
Q9JHF5	V-type proton ATPase subunit a	Tcirg1	0.535879	1	0.100857	1.07241	0.478329	1	1.03862	2.05427	0.465706	1	0.937767	1.91556	0.425192	1	2.82085	7.06578	0.974178	1	-0.00785255	0.994572	0.2252	0.564888	-0.325474	0.798036	0.241226	1	-0.317621	0.802392	0.389033	0.857841	-0.213	0.862742	0.213158	0.240227	-3.35147	0.0979732	22.9595	22.8157	23.1614	22.6194	22.6753	22.6454	23.1053	22.9582	22.5566	17	22.679
Q3UMU9	Hepatoma-derived growth factor-related protein 2	Hdgfl2	0.691413	1	0.0950771	1.06812	0.345005	1	1.53334	2.89455	0.316859	1	1.43826	2.70994	0.229425	1	0.190719	1.14133	0.331272	1	0.252811	1.19153	0.300746	0.395221	2.52277	5.74684	0.347537	1	2.26996	4.82309	0.140261	0.777059	0.58578	1.50085	0.402674	0.459764	2.66502	6.34235	24.0753	23.766	23.8891	23.6518	23.9904	24.2135	23.4925	23.9056	23.1503	23.9111	23.9113
Q61879	Myosin-10	Myh10	0.499534	1	0.0906925	1.06488	0.387746	1	1.47217	2.77439	0.356041	1	1.38148	2.60535	0.486912	1	3.15241	8.89138	0.366937	1	0.106372	1.07652	0.0161416	0.3915	0.307231	1.23733	0.165484	1	0.200859	1.14938	0.333202	0.85706	-0.190727	0.876164	0.340355	0.413163	-3.14228	0.113261	23.8078	24.2167	24.2095	24.101	24.0228	23.7345	23.8851	24.1049	24.2181	24.4524	17
Q9JMC3	DnaJ homolog subfamily A member 4	Dnaja4	0.687697	1	0.0868914	1.06208	0.371792	1	1.66291	3.16654	0.334875	1	1.57602	2.98146	0.969464	1	0.0102186	1.00711	0.650064	1	-0.109327	0.92702	0.38341	0.512121	2.51056	5.69839	0.365597	1	2.61988	6.147	0.696239	0.942008	-0.120694	0.919745	0.506727	0.577764	2.48897	5.61377	25.2227	24.545	24.4573	24.8904	24.4082	24.8308	25.0364	24.7692	24.415	24.5031	24.7155
Q8K3H0	DCC-interacting protein 13-alpha	Appl1	0.567001	1	0.0735123	1.05228	0.369362	1	1.34551	2.5412	0.334612	1	1.272	2.41496	0.400614	0.984987	3.23841	9.43752	0.423869	1	0.161105	1.11814	0.347675	0.737889	0.122168	1.08837	0.825613	1	-0.0389379	0.973371	0.530096	0.909769	0.14045	1.10225	0.26272	0.34314	-3.1369	0.113684	23.1914	23.5024	23.1784	23.2704	23.2767	23.3162	23.2595	23.3541	22.8543	23.116	17
Q91VZ6	Stromal membrane-associated protein 1	Smap1	0.688719	1	0.0653002	1.0463	0.402891	1	1.23419	2.35249	0.369062	1	1.16889	2.24838	0.478208	1	2.71781	6.57874	0.7786	1	-0.0590878	0.959871	0.678933	0.852205	0.0771802	1.05495	0.573753	1	0.136268	1.09906	0.294311	0.838242	-0.306574	0.808559	0.306175	0.389673	-2.88812	0.13508	23.1114	23.0073	23.2992	23.0065	22.723	22.9907	23.403	23.2541	22.8332	17	23.2781
Q99LR1	Lysophosphatidylserine lipase ABHD12	Abhd12	0.843285	1	0.0497755	1.0351	0.433679	1	1.22037	2.33007	0.389895	1	1.1706	2.25105	0.427536	1	3.22136	9.32663	0.899825	1	-0.024353	0.983261	0.484254	0.706023	-0.220926	0.858015	0.524526	1	-0.196573	0.872621	0.112605	0.801603	0.356519	1.28033	0.300664	0.387221	-3.06141	0.119791	23.9698	23.3695	22.9824	22.9568	23.4569	23.5106	22.8894	23.1904	23.3019	17	23.5248
Q9JI78	Peptide-N(4)-(N-acetyl-beta-glucosaminyl)asparagine amidase	Ngly1	0.856885	1	0.0358037	1.02513	0.451671	1	1.11267	2.16245	0.409499	1	1.07687	2.10945	0.472824	1	2.71091	6.54732	0.969813	1	0.00930977	1.00647	0.970921	0.99113	-0.00318336	0.997796	0.959972	1	-0.0124931	0.991378	0.364624	0.849775	-0.315244	0.803715	0.278831	0.373023	-3.03864	0.121696	22.726	23.0965	23.0511	23.2257	22.8724	22.7275	23.3815	23.2966	22.6674	17	23.178
Q9ESW4	Acylglycerol kinase, mitochondrial	Agk	0.890421	1	0.0347983	1.02441	0.473888	1	1.23526	2.35424	0.432462	1	1.20046	2.29813	0.979638	1	0.0128813	1.00897	0.941812	1	0.0202459	1.01413	0.456261	0.565165	2.01243	4.0346	0.462779	1	1.99218	3.97837	0.736389	0.938949	0.173807	1.12803	0.543715	0.623139	2.15311	4.44784	24.1884	23.8321	23.8169	23.9071	24.4496	23.5616	24.2076	23.953	23.3348	23.9389	24.0465
Q63850	Nuclear pore glycoprotein p62	Nup62	0.857432	1	0.0347618	1.02439	0.395591	1	1.29429	2.45257	0.348405	1	1.25953	2.39418	0.564478	1	-0.210066	0.864498	0.76363	1	0.0789674	1.05626	0.308919	0.399174	2.31823	4.9872	0.3234	1	2.23926	4.72156	0.685133	0.942398	0.134953	1.09806	0.387316	0.447597	2.58428	5.99717	23.3182	23.2311	23.6086	22.9977	23.6154	23.0549	22.867	23.3196	23.4139	23.6706	23.4198
O35448	Lysosomal thioesterase PPT2	Ppt2	0.885812	1	0.0345016	1.0242	0.439664	1	1.3341	2.52119	0.390167	1	1.2996	2.46161	0.478439	1	3.14339	8.83599	0.49899	1	-0.214794	0.861669	0.636095	0.796763	-0.144387	0.904764	0.505288	1	0.0704066	1.05001	0.09322	0.819191	-0.37431	0.771474	0.292808	0.379242	-3.44729	0.0916771	24.3342	24.2769	24.1448	23.3859	23.6251	23.9276	24.2335	23.9882	24.2302	17	24.2659
Q5XG71	Small subunit processome component 20 homolog	Utp20	0.936828	1	0.0341624	1.02396	0.384485	1	2.09065	4.2594	0.338318	1	2.05649	4.15972	0.384907	1	0.302051	1.2329	0.316894	1	0.441781	1.35828	0.305188	0.388629	3.66789	12.71	0.362956	1	3.22611	9.35742	0.0972698	0.42619	1.19475	2.28905	0.382416	0.439294	4.11881	17.3734	27.1916	26.9717	26.9439	26.8158	27.7666	27.5603	25.7667	27.0878	26.5515	27.1078	27.615
Q9CS72	Filamin-A-interacting protein 1	Filip1	0.99275	1	0.031312	1.02194	0.715191	1	1.06611	2.09379	0.734809	1	1.0348	2.04883	0.42265	1	-4.12842	0.0571769	0.779449	1	-1.23952	0.423512	0.37261	0.46071	3.23743	9.43112	0.299809	1	4.47695	22.2688	0.221968	0.508406	-6.40636	0.0117894	0.617317	0.708067	2.19901	4.59165	17	17	25.0038	24.4967	17	17	27.3198	17	25.8993	25.2568	17
Q71KU9	Fibrinogen-like protein 1	Fgl1	0.960652	1	0.0297796	1.02086	0.401851	1	1.31371	2.4858	0.375855	1	1.28393	2.43501	0.521093	1	2.45743	5.49239	0.315566	1	-0.6908	0.61951	0.68196	0.795603	-0.189206	0.877088	0.512427	1	0.501594	1.41578	0.238178	0.775002	-1.25664	0.418517	0.271711	0.357636	-3.21248	0.107881	24.0301	23.4288	22.8389	23.2075	23.1554	22.0298	23.7381	24.9004	22.9091	17	23.2703
P62254	Ubiquitin-conjugating enzyme E2 G1	Ube2g1	0.956897	1	0.0131861	1.00918	0.276877	1	1.3056	2.47187	0.21819	1	1.29241	2.44938	0.264581	1	0.39469	1.31466	0.443749	1	0.236382	1.17803	0.255309	0.391245	2.12728	4.36893	0.302348	1	1.8909	3.70866	0.610148	0.926184	0.141496	1.10305	0.484213	0.561889	1.6377	3.1117	21.624	22.3822	21.8781	22.6108	22.0544	22.3365	22.3935	21.959	21.8094	22.0158	21.5857
Q4ACU6	SH3 and multiple ankyrin repeat domains protein 3	Shank3	0.97612	1	0.00517015	1.00359	0.429251	1	1.77654	3.42605	0.371884	1	1.77137	3.41379	0.440882	1	4.41402	21.3184	0.726663	1	-0.0850449	0.942755	0.756718	0.87365	-0.0754369	0.949055	0.976868	1	0.00960795	1.00668	0.363425	0.847973	-0.303994	0.810007	0.266936	0.332391	-4.70841	0.0382496	26.1357	26.3704	26.1916	26.2216	26.0637	26.0208	26.7356	26.3287	25.9744	17	26.2564
Q4VA53	Sister chromatid cohesion protein PDS5 homolog B	Pds5b	0.997216	1	0.00134745	1.00093	0.526318	1	1.05102	2.07199	0.480679	1	1.04967	2.07005	0.409876	0.991094	3.50468	11.3505	0.461175	1	0.333359	1.25994	0.64692	0.751693	-0.253647	0.838773	0.392045	1	-0.587007	0.665723	0.41392	0.818594	0.602179	1.51801	0.267644	0.345378	-3.48951	0.0890334	23.2155	23.2467	23.7284	23.7651	23.2919	24.4058	23.5175	23.7147	22.5079	17	23.6884
E9Q735	Ubiquitin conjugation factor E4 A	Ube4a	0.969452	1	-0.00484686	0.996646	0.471474	1	1.20784	2.30991	0.412495	1	1.21269	2.31769	0.405582	0.979581	3.55376	11.7432	0.443113	1	0.0855471	1.06109	0.0998147	0.555613	-0.262483	0.833652	0.0523925	1	-0.34803	0.785656	0.299585	0.849161	0.24172	1.1824	0.244052	0.312966	-3.66007	0.079106	23.8149	23.8624	23.8512	23.6556	24.1703	23.7215	23.6334	23.854	23.6251	17	23.7843
Q8BH43	Wiskott-Aldrich syndrome protein family member 2	Wasf2	0.975524	1	-0.00870352	0.993985	0.440315	1	1.23063	2.34669	0.384589	1	1.23933	2.36089	0.620918	1	0.222658	1.16688	0.749889	1	0.138472	1.10074	0.411298	0.54838	2.05559	4.15713	0.447352	1	1.91712	3.77667	0.61218	0.884973	0.301061	1.23205	0.541579	0.623017	1.99552	3.98759	23.4314	23.6536	23.5165	23.4449	23.5248	23.8771	23.1963	24.1731	22.8302	23.1367	23.8199
Q6NV83	U2 snRNP-associated SURP motif-containing protein	U2surp	0.934464	1	-0.0101457	0.992992	0.442685	1	1.54973	2.92762	0.381052	1	1.55987	2.94828	0.459345	1	3.86135	14.5339	0.460452	1	-0.111622	0.925547	0.462564	0.808535	-0.086071	0.942085	0.879618	1	0.0255515	1.01787	0.216652	0.82176	-0.276424	0.825635	0.285081	0.371582	-4.11223	0.0578225	25.2373	25.2475	25.3695	25.204	25.0212	25.1966	25.513	25.5127	25.1301	17	25.495
Q5HZI1	Microtubule-associated tumor suppressor 1 homolog	Mtus1	0.935365	1	-0.0142912	0.990143	0.359934	1	1.37518	2.594	0.296986	1	1.38947	2.61983	0.378856	0.910006	3.30919	9.91207	0.95185	1	-0.0166124	0.988551	0.376083	0.778509	0.0930494	1.06662	0.698384	1	0.109662	1.07898	0.756379	0.958038	-0.112402	0.925046	0.229598	0.297701	-3.31193	0.100696	23.1857	23.4682	23.3056	23.295	23.1843	23.3367	23.6814	23.5647	22.8727	17	22.9026
Q99KY4	Cyclin-G-associated kinase	Gak	0.853289	1	-0.0285756	0.980388	0.526835	1	1.11242	2.16208	0.462194	1	1.141	2.20533	0.506259	1	-0.0989132	0.933736	0.6643	1	0.0940043	1.06733	0.453725	0.563524	2.06161	4.17452	0.474058	1	1.9676	3.91118	0.446052	0.857782	0.223811	1.16781	0.526931	0.596289	2.29033	4.89168	23.894	24.1814	23.9423	23.955	24.0346	24.2775	23.9119	24.263	23.6219	24.2341	24.2758
Q91YM4	FAST kinase domain-containing protein 4	Tbrg4	0.712612	1	-0.0373739	0.974427	0.430868	1	1.60231	3.03629	0.360376	1	1.63968	3.11597	0.617089	1	0.122373	1.08852	0.637242	1	-0.0714327	0.951692	0.422803	0.548545	2.57979	5.97852	0.4109	1	2.65122	6.28199	0.259669	0.878817	-0.131404	0.912942	0.566471	0.648064	2.39745	5.26869	25.2843	25.4676	25.1132	25.494	25.3474	25.2492	25.4902	25.2945	25.5044	25.3788	24.973
Q3URD3	Sarcolemmal membrane-associated protein	Slmap	0.910561	1	-0.0472333	0.967791	0.435303	1	1.33265	2.51865	0.369675	1	1.37988	2.60247	0.462919	1	-0.814136	0.568749	0.894154	1	-0.0901165	0.939447	0.227587	0.38636	2.75245	6.73859	0.229567	1	2.84256	7.17294	0.967195	0.990081	0.0347087	1.02435	0.2452	0.312319	3.69141	12.9189	23.7838	23.2859	24.0334	23.3508	23.4663	23.8968	22.5604	23.7947	24.5854	25.3738	23.6175
Q9D1G5	Leucine-rich repeat-containing protein 57	Lrrc57	0.755007	1	-0.0539298	0.963309	0.501743	1	0.932882	1.90909	0.421457	1	0.986812	1.9818	0.239702	1	-0.435725	0.739322	0.0146885	1	-0.300954	0.811715	0.441737	0.565555	1.63422	3.10419	0.369414	1	1.93517	3.82423	0.140667	0.814592	-0.36554	0.776178	0.476828	0.523388	2.00535	4.01487	22.8546	22.5732	22.3485	22.4325	22.6267	22.1469	22.7797	22.6876	22.7897	22.9309	22.7142
P56371	Ras-related protein Rab-4A	Rab4a	0.74407	1	-0.0546061	0.962857	0.371516	1	1.27524	2.4204	0.292191	1	1.32985	2.51376	0.407096	0.990899	3.06422	8.36418	0.46044	1	-0.171249	0.888074	0.980089	0.995175	0.00235049	1.00163	0.425498	1	0.173599	1.12787	0.900378	0.982126	-0.0346305	0.976282	0.274505	0.370529	-2.92525	0.131647	23.2808	23.0206	22.8509	22.7373	22.9378	23.0747	23.4212	22.7925	22.9089	17	22.8841
Q9CXR1	Dehydrogenase/reductase SDR family member 7	Dhrs7	0.835385	1	-0.0743179	0.949791	0.52078	1	1.23378	2.35183	0.442521	1	1.3081	2.47615	0.515423	1	-0.192044	0.875364	0.766912	1	0.0746943	1.05314	0.395196	0.528736	2.38289	5.21581	0.409246	1	2.3082	4.95264	0.0566961	0.395155	0.877638	1.83736	0.372265	0.434335	3.37788	10.3954	25.1885	24.1373	24.6439	24.3598	24.9595	25.4071	24.1603	24.0851	24.6715	25.4753	25.2753
Q810B6	Rabankyrin-5	Ankfy1	0.728508	1	-0.0791051	0.946645	0.429625	1	1.36327	2.57267	0.343706	1	1.44237	2.71767	0.390762	0.958094	3.8047	13.9742	0.526055	1	-0.130129	0.91375	0.279589	0.611403	-0.26264	0.833561	0.537902	1	-0.132511	0.912242	0.40793	0.857701	0.257611	1.1955	0.253188	0.321017	-3.6796	0.0780423	24.5228	24.0391	23.6219	24.0587	24.0028	24.5858	24.1397	23.7935	24.1768	17	23.9792
Q810J8	Zinc finger FYVE domain-containing protein 1	Zfyve1	0.535306	1	-0.0809517	0.945434	0.439567	1	1.28611	2.43869	0.352324	1	1.36706	2.57944	0.430736	1	3.41188	10.6434	0.214601	1	-0.167373	0.890463	0.362889	0.704987	-0.16353	0.892838	0.983944	1	0.00384331	1.00267	0.96012	0.991818	0.0100501	1.00699	0.282515	0.372721	-3.39799	0.0948644	24.0759	23.6183	23.7149	23.8093	23.7124	24.0708	23.7021	24.0449	23.8976	17	23.9594
Q8C5Q4	G-rich sequence factor 1	Grsf1	0.673258	1	-0.0809667	0.945424	0.421222	1	1.16873	2.24813	0.333689	1	1.24969	2.37791	0.479259	1	-0.272196	0.828058	0.0737692	1	-0.199994	0.870554	0.359531	0.461189	2.06429	4.18228	0.320367	1	2.26428	4.80416	0.13064	0.820234	-0.47579	0.719073	0.482769	0.532987	2.06069	4.17186	22.7708	23.0295	23.1043	23.0341	22.5037	23.0566	23.2801	23.3799	23.1078	22.9003	23.2044
Q9D8B3	Charged multivesicular body protein 4b	Chmp4b	0.509611	1	-0.114475	0.923718	0.467959	1	1.19125	2.2835	0.36952	1	1.30572	2.47208	0.939542	1	0.020916	1.0146	0.831821	1	0.0355803	1.02497	0.375598	0.501825	2.19784	4.58793	0.38247	1	2.16226	4.47617	0.0420297	0.584511	0.463576	1.37896	0.428156	0.470863	2.60492	6.08359	23.7461	23.5757	23.8213	23.4169	24.0048	24.0604	23.4531	23.7765	23.4775	23.7691	24.2543
P60605	Ubiquitin-conjugating enzyme E2 G2	Ube2g2	0.563686	1	-0.120743	0.919714	0.436443	1	1.35982	2.56653	0.338483	1	1.48056	2.79057	0.139757	1	0.194205	1.14409	0.860184	1	0.051967	1.03668	0.37754	0.498098	2.3901	5.24194	0.386683	1	2.33813	5.05648	0.267729	0.825477	0.330578	1.25752	0.483188	0.522452	2.47451	5.55777	24.0314	24.1658	24.5621	23.8519	24.5327	24.4111	23.976	24.5113	23.9366	24.2236	24.3318
Q9CQ06	39S ribosomal protein L24, mitochondrial	Mrpl24	0.459016	1	-0.131525	0.912866	0.459687	1	1.27655	2.42259	0.357956	1	1.40808	2.65383	0.373581	0.929817	3.75808	13.5299	0.421121	1	-0.225124	0.855522	0.236537	0.559363	-0.383712	0.766463	0.680077	1	-0.158588	0.895901	0.842307	0.976326	-0.0670586	0.954582	0.207694	0.212207	-3.98372	0.0632091	24.1738	24.0557	23.8599	23.8044	24.0767	24.0528	24.6029	23.8206	23.972	17	23.6134
P54276	DNA mismatch repair protein Msh6	Msh6	0.49619	1	-0.15004	0.901225	0.482751	1	1.22902	2.34409	0.375954	1	1.37907	2.601	0.465594	1	3.25992	9.57927	0.305729	1	-0.325103	0.798241	0.657684	0.775361	-0.199938	0.870588	0.803544	1	0.125165	1.09063	0.286776	0.811874	-0.419	0.747943	0.289032	0.377052	-3.55375	0.0851559	24.0289	23.9273	23.832	24.2379	23.8421	23.9682	24.8117	23.9968	24.1641	24.2905	17
Q3TZZ7	Extended synaptotagmin-2	Esyt2	0.591629	1	-0.174102	0.886319	0.415208	1	1.52901	2.88589	0.301728	1	1.70312	3.25604	0.769889	1	0.143336	1.10446	0.974631	1	-0.0150909	0.989594	0.339532	0.41898	2.72788	6.62481	0.330516	1	2.74297	6.69447	0.238814	0.820626	0.323127	1.25104	0.429456	0.471426	2.92276	7.58296	24.5544	25.5439	24.3887	24.0876	24.7261	25.2972	24.6791	24.7694	24.6171	25.188	24.5486
P03888	NADH-ubiquinone oxidoreductase chain 1	Mtnd1	0.594758	1	-0.183848	0.880352	0.603512	1	0.945418	1.92575	0.488786	1	1.12927	2.18747	0.140788	0.724928	-0.780342	0.582229	0.0974616	1	-0.629435	0.64643	0.534536	0.619419	1.7729	3.41741	0.411364	1	2.40234	5.28659	0.0635224	0.382911	-0.975602	0.508527	0.559985	0.643237	2.20708	4.61739	24.1929	23.7117	24.0892	24.1136	23.6617	23.589	25.0243	24.1232	24.6552	24.7322	24.0791
Q8K2Q0	COMM domain-containing protein 9	Commd9	0.531621	1	-0.206301	0.866757	0.606331	1	0.823642	1.76987	0.475137	1	1.02994	2.04194	0.161431	0.830781	-0.549376	0.683316	0.443559	1	-0.383128	0.766773	0.492976	0.586895	1.69969	3.24832	0.416291	1	2.08282	4.23635	0.499633	0.857922	-0.4557	0.729156	0.509393	0.582787	2.1765	4.52055	23.1821	23.2167	23.1514	23.2438	22.9598	23.303	24.4244	23.4554	22.8814	23.4957	23.8658
Q3UQ84	Threonine--tRNA ligase, mitochondrial	Tars2	0.674892	1	-0.217255	0.8602	0.44744	1	1.0627	2.08884	0.332161	1	1.27996	2.42832	0.483046	1	-0.286554	0.819858	0.693548	1	-0.328865	0.796163	0.345317	0.444329	1.99544	3.98737	0.312802	1	2.3243	5.00823	0.733409	0.92618	-0.371916	0.772755	0.422365	0.471323	2.23894	4.7205	22.5703	22.9618	22.6032	22.5917	22.8145	22.5373	24.5344	22.6289	21.9801	22.6569	23.268
Q9JK23	Proteasome assembly chaperone 1	Psmg1	0.272696	1	-0.247539	0.842332	0.35871	1	1.51098	2.85004	0.230923	1	1.75852	3.38351	0.028654	0.518625	0.66533	1.58593	0.478718	1	-0.260679	0.834695	0.394616	0.529106	2.22664	4.68042	0.347005	1	2.48732	5.60734	0.98046	0.997742	0.00799402	1.00556	0.585216	0.675213	1.82998	3.55532	23.9317	24.3433	23.6654	23.5906	24.13	24.1402	24.5863	23.9647	23.8302	23.5847	23.3547
Q99LC8	Translation initiation factor eIF-2B subunit alpha	Eif2b1	0.907064	1	-0.250729	0.840472	0.659055	1	1.06276	2.08892	0.540376	1	1.31349	2.48542	0.402912	0.98725	3.37126	10.3478	0.343896	1	2.30746	4.95011	0.358983	0.457925	2.2491	4.75388	0.985681	1	-0.058356	0.960358	0.47371	0.823084	2.27632	4.8444	0.774216	0.862446	-1.1533	0.449597	17	23.6117	23.6792	23.4811	23.8628	23.2562	23.0821	23.7675	17	23.3765	17
O08638	Myosin-11	Myh11	0.771027	1	-0.260462	0.834821	0.506981	1	1.69979	3.24853	0.398458	1	1.96025	3.89129	0.922367	1	0.284636	1.2181	0.823659	1	0.273441	1.20869	0.341995	0.420541	3.35077	10.2019	0.382585	1	3.07733	8.44049	0.329719	0.802545	1.44634	2.72515	0.398065	0.446668	4.23903	18.8831	26.5647	25.0566	27.6648	26.437	26.8286	28.2895	24.9181	25.6187	27.8013	29.7538	24.795
Q8R4R6	Nucleoporin NUP35	Nup35	0.891	1	-0.305091	0.809391	0.426192	1	1.74144	3.3437	0.295376	1	2.04654	4.13113	0.42265	1	2.94559	7.70393	0.59532	1	-1.52599	0.347241	0.97934	0.97949	-0.0788282	0.946826	0.621346	1	1.44716	2.72671	0.869552	0.967162	-0.563773	0.676531	0.495025	0.569051	-2.06221	0.23945	22.9649	22.9501	17	17	17	22.8912	22.2724	22.2557	17	17	17
Q9EQP2	EH domain-containing protein 4	Ehd4	0.254956	1	-0.310529	0.806346	0.424655	1	1.30814	2.47621	0.267807	1	1.61866	3.07091	0.469091	1	3.34566	10.1659	0.249182	1	-0.368408	0.774637	0.646743	0.828851	0.0989246	1.07097	0.15434	1	0.467333	1.38255	0.365962	0.849141	0.315696	1.24461	0.430475	0.472129	-2.56263	0.169266	24.1743	23.2157	23.7181	23.3793	24.1359	24.1077	23.4262	23.7713	24.2207	24.5523	17
A0A5F8MPH8	Tenascin XB	Tnxb	0.667616	1	-0.3158	0.803406	0.639977	1	0.908699	1.87735	0.482553	1	1.2245	2.33674	0.736236	1	-0.607042	0.656541	0.744777	1	0.309643	1.2394	0.29977	0.387982	2.75517	6.75132	0.376909	1	2.44553	5.44724	0.777855	0.93966	0.344413	1.26963	0.366147	0.432213	3.39698	10.534	22.3989	24.7174	24.3086	24.0228	24.4227	24.3461	24.1038	22.5119	25.5042	26.5607	23.4221
P12790	Cytochrome P450 2B9	Cyp2b9	0.90509	1	-0.423439	0.745645	0.799917	1	1.01037	2.01443	0.720044	1	1.43381	2.7016	0.733507	1	0.14152	1.10307	0.383765	1	1.36588	2.57733	0.00241406	0.345429	3.66122	12.6513	0.149915	1	2.29534	4.9087	0.00975699	0.551714	9.82375	906.241	2.30824e-05	0.0853333	11.9776	4032.81	29.222	19.6986	21.5537	20.7313	29.2045	29.0337	17	19.421	21.465	28.6259	29.3293
A2AGT5	Cytoskeleton-associated protein 5	Ckap5	0.869769	1	-0.427268	0.743669	0.727197	1	0.905481	1.87317	0.566156	1	1.33275	2.51882	0.76517	1	0.0212135	1.01481	0.977	1	0.0978858	1.0702	0.373901	0.488421	2.30499	4.94164	0.373901	1	2.20711	4.61748	0.237343	0.586432	4.19543	18.3211	1.7373e-07	0.175	6.38132	83.3623	23.9171	17	23.915	17	23.3525	23.4526	17	23.6213	17	23.418	23.3446
Q5F2E7	Nuclear fragile X mental retardation-interacting protein 2	Nufip2	0.827881	1	-0.431665	0.741406	0.68051	1	0.905212	1.87282	0.502916	1	1.33688	2.52604	0.393488	0.977763	3.08033	8.45808	0.956513	1	-0.169312	0.889267	0.998618	0.997871	0.00526301	1.00365	0.955165	1	0.174575	1.12863	0.569995	0.853711	1.72957	3.3163	0.749811	0.834334	-1.17618	0.442521	22.7539	22.9195	23.1884	17	23.0012	22.8685	17	23.521	23.0949	17	22.709
O35405	5-3 exonuclease PLD3	Pld3	0.884494	1	-0.359795	0.779275	0.792082	1	0.76906	1.70416	0.662822	1	1.12886	2.18685	0.00046016	1	7.37878	166.431	0.950069	1	-0.235144	0.8496	0.252565	0.394854	-3.27291	0.103456	0.299052	1	-3.03776	0.121771	0.534178	0.847089	2.30107	4.92824	2.80847e-05	0.119	-8.11547	0.00360578	25.0257	23.6652	17	24.8624	24.2204	24.5371	24.887	24.3461	17	17	17
Q9D394	Protein RUFY3	Rufy3	0.837356	1	-0.392846	0.761626	0.812617	1	0.531654	1.44559	0.64687	1	0.9245	1.89803	0.440996	1	2.80877	7.00685	0.998113	1	0.00709979	1.00493	0.917464	0.928113	-0.324577	0.798532	0.915799	1	-0.331677	0.794612	0.540151	0.852581	1.78305	3.44153	0.727656	0.811966	-1.35739	0.390287	22.2218	17	22.6529	23.2534	22.5018	22.9876	22.4804	23.4046	17	17	22.8719
Q8BH60	Golgi-associated PDZ and coiled-coil motif-containing protein	Gopc	0.807057	1	-0.437902	0.738207	0.692199	1	0.787075	1.72557	0.498516	1	1.22498	2.33752	0.335519	0.847898	3.07324	8.41664	0.915252	1	-0.287716	0.819198	0.913298	0.925406	-0.294917	0.815119	0.997957	1	-0.00720151	0.995021	0.512425	0.838711	1.7862	3.44905	0.697695	0.786212	-1.29425	0.407749	22.6983	17	22.0309	22.2924	22.411	22.619	22.4506	22.7359	17	21.8835	17
Q99JI1	Musculoskeletal embryonic nuclear protein 1	Mustn1	0.849478	1	-0.440328	0.736967	0.8434	1	0.486371	1.40092	0.675003	1	0.926699	1.90092	0.497172	1	-0.775085	0.584354	0.966538	1	0.134418	1.09765	0.373901	0.494499	2.19564	4.58093	0.373901	1	2.06122	4.1734	0.27772	0.761652	3.52485	11.5103	0.00267192	0.278	6.36116	82.2055	22.5364	17	23.5869	17	22.3944	22.7777	17	23.1837	17	24.2836	22.4387
Q8K2I3	Dimethylaniline monooxygenase [N-oxide-forming] 2	Fmo2	0.699033	1	-0.459762	0.727106	0.739009	1	0.571316	1.48588	0.531292	1	1.03108	2.04355	0.813764	1	0.201046	1.14953	0.963577	1	0.0365562	1.02566	0.316769	0.418054	1.62099	3.07586	0.367102	1	1.58443	2.9989	0.0460521	0.335014	3.00539	8.02995	0.10166	0.135445	4.38878	20.9485	26.1396	23.0797	23.0159	23.8533	26.1422	26.428	22.0904	23.2262	24.5225	26.8203	25.3478
Q9CRB6	Tubulin polymerization-promoting protein family member 3	Tppp3	0.705525	1	-0.685692	0.621708	0.77033	1	0.770899	1.70633	0.511198	1	1.45659	2.74459	0.80537	1	-1.32667	0.398686	0.92943	1	0.236303	1.17797	0.12001	0.361387	3.5484	11.6997	0.130443	1	3.3121	9.93212	0.971561	0.990391	0.0872355	1.06233	0.272228	0.343064	4.72601	26.465	17	17	22.8502	21.795	20.2709	20.5277	21.0185	17	22.9178	26.452	17
Q8R1S4	Protein MTSS 1	Mtss1	0.726798	1	-0.718422	0.607762	0.741995	1	0.742015	1.67251	0.484964	1	1.46044	2.75192	0.443083	1	0.232688	1.17502	0.868259	1	-0.506913	0.703727	0.555781	0.636437	1.77202	3.41533	0.48134	1	2.27894	4.8532	0.483796	0.824035	2.21266	4.63529	0.198823	0.190745	4.25891	19.1452	23.4702	17	22.3331	22.995	23.351	23.6402	23.1054	23.7433	17	23.4611	23.0647
D3Z6Q9;Q7TQF7	Bridging integrator 2;Amphiphysin	Bin2;Amph	0.746939	1	-0.728965	0.603337	0.905552	1	0.258975	1.19663	0.632444	1	0.987941	1.98335	0.42265	1	2.80082	6.96836	0.373901	1	-2.05488	0.240668	0.373901	0.489339	-2.27553	0.206537	0.946085	1	-0.220645	0.858182	0.839301	0.958716	0.745938	1.67706	0.495025	0.562196	-2.27553	0.206537	23.4972	17	17	17	17	22.6016	17	23.1646	17	17	17
Q6ZQ06	Centrosomal protein of 162 kDa	Cep162	0.407084	1	-1.33175	0.397287	0.00964433	0.508	-5.3347	0.0247796	0.0664622	1	-4.00296	0.0623719	0.42265	1	-3.35683	0.0976097	0.373901	1	-2.21958	0.214705	4.43186e-08	0	-6.65329	0.00993485	0.116545	1	-4.43371	0.0462722	0.495025	0.821308	-2.21958	0.214705	0.279449	0.371722	-3.29646	0.101781	17	17	17	17	17	17	17	17	23.6587	17	23.7137
Q8VD04	GRIP1-associated protein 1	Gripap1	0.0971292	1	-2.65851	0.158383	0.119978	1	-2.45815	0.18198	0.0459906	1	0.200355	1.14898	0.438337	1	0.196376	1.14582	0.129114	1	-3.54062	0.0859344	0.146828	0.381801	-3.33761	0.0989187	0.113117	1	0.203007	1.1511	0.955404	0.99184	-0.00881386	0.993909	0.988349	0.997337	-0.00218232	0.998488	22.37	22.5668	17	17	22.2083	22.5665	22.4832	22.3393	22.3663	22.0923	22.2898
P49138	MAP kinase-activated protein kinase 2	Mapkapk2	0.379893	1	-1.11535	0.46158	0.507076	1	-0.833173	0.561294	0.132175	1	0.282175	1.21603	0.331126	1	0.184983	1.1368	0.417459	1	0.207191	1.15444	0.0874484	0.394807	0.554161	1.46831	0.298586	1	0.34697	1.27189	0.846855	0.976961	-0.0552715	0.962413	0.736503	0.90665	0.106716	1.07677	17	22.1401	22.4797	22.516	22.2131	22.0192	22.4698	21.8029	22.2415	21.8228	22.0395
Q9Z126	Platelet factor 4	Pf4	0.520755	1	-1.2795	0.411939	0.338053	1	-1.9211	0.264054	0.198882	1	-0.641601	0.641001	0.233914	0.853922	-0.763736	0.588969	0.405187	1	-2.33318	0.198446	0.303195	0.392407	-2.89336	0.13459	0.484221	1	-0.560178	0.678218	0.677403	0.901653	0.392313	1.3125	0.331388	0.478864	0.59587	1.51138	26.6607	17	24.7309	23.7239	24.8309	24.2566	24.2159	23.0106	25.2278	25.658	24.957
Q9JIX0	Transcription and mRNA export factor ENY2	Eny2	0.412485	1	-1.33716	0.395799	0.297428	1	-1.73278	0.300871	0.156205	1	-0.395622	0.760161	0.670087	1	-0.194212	0.87405	0.456871	1	-1.94066	0.260497	0.354692	0.444763	-2.47056	0.180421	0.113675	1	-0.529896	0.692605	0.47319	0.85686	-0.283154	0.821793	0.117765	0.33749	-0.618838	0.651195	23.6561	23.7594	24.3261	17	23.7241	22.9812	23.775	23.8173	23.3151	23.4187	23.6751
P11859	Angiotensinogen	Agt	0.328814	1	-1.42257	0.373047	0.424071	1	-1.15024	0.450549	0.052117	1	0.272326	1.20775	0.20119	0.991296	0.425085	1.34265	0.405676	1	-1.87122	0.273343	0.446413	0.564519	-1.70073	0.30763	0.107136	1	0.170487	1.12544	0.0127196	0.662164	0.334884	1.26128	0.700145	0.91276	0.0802863	1.05723	23.3598	17	23.0081	23.0803	23.1827	23.2884	22.8526	22.9747	22.8746	23.0306	22.5904
Q9JLV6	Bifunctional polynucleotide phosphatase/kinase	Pnkp	0.301951	1	-1.56022	0.3391	0.350243	1	-1.40592	0.377376	0.196595	1	0.154291	1.11287	0.590514	1	0.149325	1.10905	0.383126	1	-2.08982	0.23491	0.417576	0.549488	-1.93222	0.262026	0.335611	1	0.157601	1.11543	0.545249	0.964448	-0.0478249	0.967394	0.882399	0.970354	-0.0395492	0.972959	23.3104	17	23.3012	23.5042	23.3917	23.2293	23.3487	23.3158	23.4104	23.3819	22.9403
Q8VBW6	NEDD8-activating enzyme E1 regulatory subunit	Nae1	0.330122	1	-1.64198	0.320417	0.252838	1	-1.95265	0.25834	0.119506	1	-0.310678	0.806263	0.499343	1	-0.332107	0.794376	0.645006	1	0.152736	1.11168	0.565193	0.764621	-0.143656	0.905222	0.249324	1	-0.296392	0.814286	0.863187	0.977568	0.0593764	1.04202	0.746679	0.912968	0.0950912	1.06813	17	23.6406	24.2851	24.3258	23.7778	24.2032	24.3389	23.8292	23.6252	24.6684	23.9767
Q99M04	Lipoyl synthase, mitochondrial	Lias	0.286304	1	-1.64566	0.319599	0.222239	1	-1.90776	0.266506	0.102591	1	-0.262093	0.833878	0.185244	0.974179	-0.40767	0.75384	0.845903	1	-0.0490723	0.966558	0.228714	0.632187	-0.214113	0.862076	0.480839	1	-0.165041	0.891903	0.871754	0.984534	-0.0450716	0.969242	0.355375	0.717156	0.197557	1.14676	17	23.6921	23.2444	23.439	23.4908	23.4342	23.4283	23.211	23.8833	23.667	24.0733
Q99K41	EMILIN-1	Emilin1	0.305873	1	-1.65672	0.317159	0.382101	1	-1.39901	0.379189	0.05572	1	0.25771	1.19558	0.421793	1	0.215199	1.16086	0.368914	1	-2.25486	0.209518	0.427447	0.558163	-1.96881	0.255464	0.0948876	1	0.28605	1.2193	0.496916	0.909518	0.131501	1.09543	0.292552	0.679241	0.202353	1.15057	24.0593	23.7036	23.6655	17	23.6326	24.0528	23.6271	23.8073	23.6992	23.5834	23.6716
Q3TDD9	Protein phosphatase 1 regulatory subunit 21	Ppp1r21	0.115624	1	-3.2996	0.10156	0.00942103	0.541	-4.44576	0.0458872	0.361811	1	-1.14616	0.451825	0.419958	1	-2.93515	0.130747	0.102232	1	-4.0324	0.061112	0.10445	0.286245	-3.9859	0.0631137	0.777043	1	0.0464973	1.03275	0.259808	0.676314	-3.02171	0.123133	0.632681	0.946864	-0.0400575	0.972616	17	22.7106	17	17	17	22.8285	23.1906	22.6881	22.9291	22.797	22.9018
P08905;P17897	Lysozyme C-2;Lysozyme C-1	Lyz2;Lyz1	0.351431	1	-1.99179	0.251426	0.0465196	1	-3.57904	0.0836761	0.240879	1	-1.58725	0.332806	0.559423	1	-0.44529	0.734437	0.43722	1	-2.40297	0.189075	0.0628597	0.24	-4.75152	0.0371235	0.335142	1	-2.34855	0.196343	0.615167	0.857074	1.52462	2.87711	0.616143	0.773034	-0.37864	0.769163	22.9034	22.4578	17	17	22.8637	22.63	23.4029	17	23.2638	23.823	22.5613
Q8BGX2	Mitochondrial import inner membrane translocase subunit Tim29	Timm29	0.654842	1	-0.888316	0.540244	0.125407	1	-2.86648	0.137121	0.278371	1	-1.97817	0.253812	0.961315	1	0.201102	1.14958	0.965372	1	-0.117299	0.921912	0.111071	0.333577	-3.54831	0.0854776	0.138414	1	-3.43101	0.0927177	0.804911	0.942095	0.842524	1.79318	0.231798	0.308783	-2.78959	0.144627	17	22.2081	17	17	22.3917	17	17	22.56	17	17	21.9895
A0A1Y7VJN6;P03987	Immunoglobulin heavy constant gamma 3;Ig gamma-3 chain C region	Ighg3;-	0.661199	1	-1.11077	0.463046	0.15896	1	-3.63754	0.0803509	0.307249	1	-2.52677	0.173527	0.301243	0.760362	-4.89663	0.0335712	0.373901	1	-2.34168	0.19728	0.12421	0.369848	-3.28854	0.102341	0.759639	1	-0.946859	0.518761	0.798684	0.9392	1.1051	2.15114	0.112571	0.135584	5.05487	33.2405	23.6918	17	17	17	23.8936	17	17	17	24.025	26.1708	24.516
Q149B8	PGC-1 and ERR-induced regulator in muscle protein 1	Perm1	0.645282	1	-1.18744	0.439082	0.115733	1	-3.85817	0.0689567	0.266172	1	-2.67073	0.157047	0.42265	1	-3.61665	0.0815229	0.480685	1	-2.53554	0.172475	0.109378	0.288745	-4.57566	0.0419363	0.441576	1	-2.04012	0.243144	0.220131	0.51654	-4.76147	0.0368685	0.323232	0.39855	-3.18493	0.109961	17	17	23.6778	17	17	17	24.458	17	23.8264	24.2333	17
O55042	Alpha-synuclein	Snca	0.690832	1	-1.25288	0.419608	0.190297	1	-3.67188	0.0784609	0.374337	1	-2.419	0.186986	0.452311	1	-3.71638	0.0760777	0.373901	1	-3.07216	0.118901	0.116193	0.332519	-4.62624	0.0404915	0.70683	1	-1.55407	0.340547	0.88176	0.974407	0.793061	1.73275	0.410019	0.4607	2.95537	7.75631	25.546	17	17	17	24.7304	17	17	17	26.2165	25.6662	23.497
Q922F4	Tubulin beta-6 chain	Tubb6	0.407084	1	-1.56253	0.338557	0.194559	1	-3.38673	0.0956076	0.503331	1	-1.8242	0.282397	NaN	1	0	1	0.373901	1	-2.60421	0.164457	0.118005	0.313016	-5.64455	0.0199904	0.474415	1	-3.04034	0.121554	0.495025	0.822072	-2.60421	0.164457	0.221599	0.224052	-5.64455	0.0199904	17	17	17	17	17	17	24.8126	17	17	17	17
Q80YC5	Coagulation factor XII	F12	0.423558	1	-1.73138	0.301163	0.185093	1	-2.63238	0.161278	0.618928	1	-0.900996	0.535517	0.493672	1	-2.13435	0.227769	0.134299	1	-3.67205	0.0784516	0.120797	0.356187	-3.75081	0.0742837	0.978412	1	-0.078757	0.946873	0.749781	0.918178	-1.10836	0.463821	0.726661	0.816658	0.947237	1.92818	22.9893	17	17	17	22.1274	17	17	21.3195	23.6967	21.5127	21.8834
Q6P3D0	U8 snoRNA-decapping enzyme	Nudt16	0.33487	1	-1.7367	0.300055	0.0670916	1	-2.60115	0.164808	0.432467	1	-0.864447	0.549257	0.429918	1	0.137767	1.1002	0.495872	1	-1.7312	0.301202	0.109651	0.331014	-3.26379	0.104112	0.416998	1	-1.53259	0.345656	0.438707	0.818449	1.93984	3.83662	0.335534	0.643981	0.26948	1.20537	21.665	21.7498	17	17	22.2926	22.216	22.5165	21.4269	17	22.2516	21.9815
P12246	Serum amyloid P-component	Apcs	0.432459	1	-1.78366	0.290445	0.124343	1	-2.82321	0.141296	0.460122	1	-1.03954	0.486481	0.126989	0.893449	-0.387642	0.764378	0.419421	1	-2.64665	0.15969	0.0996757	0.265282	-4.1208	0.0574798	0.573487	1	-1.47415	0.359946	0.776631	0.936494	0.928858	1.90377	0.864139	0.945268	-0.157646	0.896487	23.7538	17	22.4469	17	22.2399	22.5424	17	24.7754	22.6115	22.8027	22.7549
Q61735	Leukocyte surface antigen CD47	Cd47	0.435085	1	-2.15312	0.224826	0.101954	1	-3.69842	0.0770309	0.336241	1	-1.5453	0.342625	0.551418	1	-0.168393	0.889833	0.965695	1	0.164261	1.12059	0.423591	0.549863	-2.29897	0.203208	0.380293	1	-2.46323	0.18134	0.483805	0.825798	2.57002	5.93816	0.288995	0.602487	0.275175	1.21014	17	24.6876	17	24.7849	24.4105	24.716	24.4273	24.5524	17	24.9132	24.5501
P08032	Spectrin alpha chain, erythrocytic 1	Spta1	0.356381	1	-2.53009	0.173127	0.182241	1	-3.33451	0.099132	0.665806	1	-0.804411	0.572596	0.669367	1	-1.55202	0.341032	0.2107	1	-4.18148	0.0551123	0.0684914	0.24707	-4.48749	0.0445792	0.911001	1	-0.306004	0.808879	0.854087	0.962808	0.69407	1.61784	0.425879	0.476492	1.94009	3.83729	27.7291	17	21.3475	21.6916	27.0806	22.6966	21.7924	21.8614	28.9297	28.6785	24.2028
P01869	Ig gamma-1 chain C region, membrane-bound form	Ighg1	0.759622	1	-0.916418	0.529823	0.496511	1	-1.76479	0.29427	0.717917	1	-0.848368	0.555412	0.198608	0.790374	-0.792853	0.577201	0.625215	1	-1.79843	0.287488	0.328733	0.418183	-2.6838	0.15563	0.823723	1	-0.885379	0.541345	0.528223	0.838989	2.87621	7.34216	0.365556	0.432986	2.78368	6.88607	26.4634	21.0002	17	17	23.0902	22.9259	17	17	26.3955	24.2112	23.3906
P18581	Cationic amino acid transporter 2	Slc7a2	0.695123	1	-1.03456	0.488164	0.360986	1	-2.49946	0.176842	0.571334	1	-1.4649	0.362261	0.428184	1	-3.42201	0.0932979	0.994835	1	-0.0235729	0.983793	0.961082	0.959455	-0.183732	0.880422	0.966224	1	-0.160159	0.894926	0.817544	0.945449	1.02201	2.03074	0.291728	0.372316	4.28386	19.4791	17	24.2263	17	17	23.9087	17	24.297	17	17	23.5308	24.2219
O55028	dehydrogenase [lipoamide]] kinase, mitochondrial	Bckdk	0.632422	1	-1.0703	0.476219	0.369388	1	-1.90968	0.266152	0.69409	1	-0.839376	0.558885	0.42265	1	-3.08885	0.117534	0.469602	1	-2.25632	0.209306	0.568557	0.639401	-1.59604	0.330783	0.820977	1	0.660274	1.58038	0.224225	0.567972	-4.14624	0.0564751	0.909678	0.959277	-0.397116	0.759375	17	17	22.6698	17	17	17	22.6035	17	23.8352	23.1777	17
A0A075B5T2	Ig-like domain-containing protein	Ighv6-3	0.407084	1	-1.11812	0.460694	0.219882	1	-2.60325	0.164567	0.486994	1	-1.48513	0.357216	0.42265	1	-4.20627	0.0541734	0.373901	1	-1.86353	0.274802	0.373901	0.525478	-1.53457	0.345181	0.898192	1	0.32896	1.25611	0.495025	0.822782	-1.86353	0.274802	0.52334	0.588527	2.6717	6.37179	17	17	17	17	17	17	17	17	22.5906	25.4125	17
O35206	Collagen alpha-1(XV) chain	Col15a1	0.618763	1	-1.26422	0.416325	0.304271	1	-2.73106	0.150615	0.578755	1	-1.46684	0.361773	0.42265	1	-2.70846	0.152993	0.460742	1	-2.62372	0.162249	0.388282	0.502487	-3.26282	0.104182	0.868919	1	-0.6391	0.642113	0.237314	0.584404	-4.69045	0.0387287	0.558241	0.639278	-2.6211	0.162544	17	17	17	23.2002	17	17	25.3646	17	22.7068	22.4169	17
Q02357	Ankyrin-1	Ank1	0.656951	1	-1.49506	0.354766	0.442916	1	-2.3261	0.199422	0.782946	1	-0.831041	0.562124	0.794538	1	-1.24493	0.421927	0.56454	1	-2.36459	0.194173	0.32464	0.411026	-2.9197	0.132155	0.902406	1	-0.555112	0.680604	0.598316	0.853757	2.96449	7.80547	0.406592	0.457369	3.65431	12.5909	26.4282	17	17	20.6209	26.2936	20.7784	17	17	27.7146	27.9397	21.6222
A0A075B5R1	Ig-like domain-containing protein	Ighv5-17	0.193968	1	-2.29808	0.203334	0.193529	1	-2.70825	0.153016	0.855376	1	-0.41017	0.752535	0.275884	0.769687	-4.05387	0.0602094	0.373901	1	-2.01896	0.246735	NaN	1	0	1	0.373901	1	2.01896	4.05292	0.846115	0.961416	0.697783	1.62201	5.81448e-05	0.172952	6.77061	109.184	17	17	17	17	22.4335	17	17	23.0569	17	23.5	24.0413
B2RXZ2	Cyp2a22 protein	Cyp2a22	0.193309	1	-2.55501	0.170163	0.19653	1	-2.39197	0.190522	0.941498	1	0.163045	1.11965	0.59559	1	0.407612	1.32649	NaN	1	0	1	NaN	1	0	1	NaN	1	0	1	2.57156e-05	0.502286	6.38754	83.7221	0.00100653	0.288432	5.97993	63.1156	17	17	17	17	23.582	23.1931	17	17	17	22.3578	23.6021
Q91V08	C-type lectin domain family 2 member D	Clec2d	0.0801751	1	-2.87088	0.136703	0.0656942	1	-3.07834	0.118393	0.216391	1	-0.20746	0.866061	0.783618	1	-0.0472927	0.967751	0.0855808	1	-3.91697	0.0662026	0.0716872	0.249913	-4.23121	0.0532451	0.246319	1	-0.314238	0.804276	0.800212	0.982347	-0.0346095	0.976296	0.380294	0.647608	-0.301554	0.811378	22.8527	22.1711	17	17	22.7523	22.4598	22.5532	22.6511	22.7176	22.6905	22.6162
O89106	Bis(5-adenosyl)-triphosphatase	Fhit	0.108691	1	-3.22881	0.106667	0.101811	1	-3.31439	0.100524	0.618558	1	-0.0855827	0.942404	0.525643	1	-0.218444	0.859492	0.11818	1	-4.39952	0.047382	0.118261	0.326417	-4.39653	0.0474803	0.986217	1	0.00299136	1.00208	0.430162	0.878045	0.173212	1.12757	0.186607	0.457642	0.394647	1.31462	24.1734	17	17	23.6403	23.9275	23.6448	23.6573	23.3814	23.8002	23.7552	24.254
Q9DCJ1	Target of rapamycin complex subunit LST8	Mlst8	0.0682946	1	-3.3896	0.0954174	0.0684414	1	-3.13182	0.114085	0.894925	1	0.257787	1.19564	0.894605	1	0.575454	1.49015	0.116738	1	-3.65786	0.0792272	0.116284	0.346296	-3.61185	0.0817946	0.986595	1	0.0460097	1.03241	0.849701	0.963436	-0.67064	0.628228	0.71099	0.798315	-1.20008	0.43525	17	17	17	17	17	22.9744	17	22.2698	22.7037	17	21.8235
Q99J83	Autophagy protein 5	Atg5	0.075805	1	-3.58875	0.0831149	0.0937829	1	-3.31197	0.100692	0.305905	1	0.276776	1.21148	0.842165	1	0.069478	1.04934	0.102034	1	-4.77382	0.0365542	0.121167	0.34995	-4.35884	0.0487368	0.369425	1	0.414975	1.33328	0.843474	0.97446	-0.114048	0.923992	0.386745	0.698585	0.231449	1.17401	23.7785	23.662	17	17	23.914	23.8469	24.7755	23.3863	23.8217	23.5054	24.1165
P49817	Caveolin-1	Cav1	0.162012	1	-3.75408	0.0741156	0.154595	1	-3.90014	0.0669793	0.84529	1	-0.146064	0.903713	0.38501	1	-1.53821	0.344313	0.473292	1	-2.50863	0.175723	0.606491	0.672241	-1.7266	0.302164	0.329436	1	0.782031	1.71955	0.469136	0.836729	-0.751112	0.594146	0.228661	0.344313	1.56913	2.96725	17	17	26.121	26.4297	24.9593	24.9229	25.0028	24.9739	27.0999	27.8738	25.0848
Q8BGE6	Cysteine protease ATG4B	Atg4b	0.200579	1	-1.58494	0.333338	0.157583	1	-1.75048	0.297203	0.65844	1	-0.165537	0.891597	0.605068	1	0.161616	1.11854	0.346389	1	-1.88345	0.271036	0.257819	0.39252	-2.26708	0.207749	0.530567	1	-0.383639	0.766502	0.847453	0.972778	-0.137369	0.909176	0.155921	0.373211	-0.682624	0.623031	21.3653	17	21.938	22.2353	21.8927	22.3817	23.14	21.4518	22.2318	21.8712	22.0799
Q3U0V2	Tumor necrosis factor receptor type 1-associated DEATH domain protein	Tradd	0.210494	1	-1.67875	0.312352	0.164058	1	-1.86337	0.274834	0.49176	1	-0.184613	0.879885	0.286971	1	0.353482	1.27764	0.398841	1	-1.75981	0.295287	0.283573	0.390522	-2.30315	0.20262	0.153905	1	-0.543344	0.686179	0.14723	0.749222	0.686042	1.60886	0.479453	0.753155	-0.210785	0.864067	22.122	22.5945	22.506	17	23.3869	22.9051	22.6379	22.7485	21.9934	22.744	22.8411
Q64481	Cytochrome P450 3A16	Cyp3a16	0.196007	1	-3.02524	0.122832	0.200623	1	-3.15112	0.112569	0.964117	1	-0.125873	0.916449	0.844115	1	-0.314682	0.804028	NaN	1	0	1	NaN	1	0	1	NaN	1	0	1	0.000792781	0.757067	7.56311	189.114	0.00314979	0.271822	7.87779	235.208	17	17	17	17	23.8372	25.289	17	17	17	23.669	26.0865
A0A0G2JE99;P01843	Ig-like domain-containing protein;Ig lambda-1 chain C region	Iglc1;-	0.714332	1	-0.923062	0.527388	0.62179	1	-1.33361	0.396774	0.870583	1	-0.410547	0.752338	0.272405	0.713833	-4.68071	0.0389913	0.409572	1	-2.71586	0.15221	0.926276	0.930115	-0.279638	0.823798	0.48057	1	2.43622	5.41224	0.717323	0.897388	-1.49064	0.355854	0.136735	0.143096	5.62629	49.3948	23.649	17	22.5885	17	23.1761	17	17	23.8218	23.9142	24.3193	25.2182
P15089	Mast cell carboxypeptidase A	Cpa3	0.72013	1	-0.951846	0.516971	0.718965	1	-0.961615	0.513482	0.996895	1	-0.00976906	0.993251	0.706088	1	-0.258474	0.835971	0.57393	1	1.96476	3.90348	0.531542	0.612117	2.1208	4.34934	0.963711	1	0.156034	1.11422	0.228385	0.57173	4.59111	24.1025	0.179895	0.169814	5.00562	32.1249	17	17	24.0477	22.9143	24.0294	23.8646	17	24.0677	17	24.7941	23.6168
O08532	Voltage-dependent calcium channel subunit alpha-2/delta-1	Cacna2d1	0.62401	1	-1.07113	0.475945	0.576207	1	-1.37632	0.385201	0.899345	1	-0.305185	0.809338	0.324616	0.827053	-4.21532	0.0538346	0.875951	1	-0.487498	0.713261	0.373901	0.516426	1.81408	3.51634	0.373901	1	2.30157	4.92995	0.932925	0.983883	0.32529	1.25292	0.0174327	0.178963	6.84219	114.737	17	17	17	22.4422	22.2537	17	17	17	23.9047	25.7638	21.9206
Q01149	Collagen alpha-2(I) chain	Col1a2	0.645005	1	-1.12515	0.458454	0.697344	1	-0.984597	0.505367	0.903221	1	0.140554	1.10233	0.680713	1	-1.13645	0.454879	0.36859	1	1.28804	2.44196	0.0200186	0.255667	2.27992	4.85653	0.467512	1	0.991887	1.98878	0.909902	0.980021	-0.195635	0.873189	0.357727	0.43937	1.9327	3.81768	17	27.3999	27.4886	26.0088	24.8587	26.1055	23.4218	26.2145	27.397	28.9207	24.3164
P26262	Plasma kallikrein	Klkb1	0.494584	1	-1.14937	0.450821	0.349075	1	-1.5698	0.336855	0.317186	1	-0.420425	0.747204	0.374807	1	-0.72137	0.606521	0.376251	1	-2.23149	0.212939	0.325956	0.41786	-2.45128	0.182848	0.715453	1	-0.219796	0.858687	0.488045	0.849203	-0.574955	0.671307	0.885342	0.961252	-0.0733808	0.950408	24.7114	24.0835	22.8251	17	23.3287	22.5901	22.9725	23.0509	24.5797	24.1996	23.162
A6H6J2	Cytochrome P450, family 2, subfamily b, polypeptide 13	Cyp2b13	0.676806	1	-1.15783	0.448186	0.702949	1	-1.02996	0.489725	0.961448	1	0.127873	1.09268	0.455137	1	0.319682	1.24806	NaN	1	0	1	NaN	1	0	1	NaN	1	0	1	5.81732e-05	0.499	7.55317	187.815	1.24168e-05	0.115733	7.23348	150.486	24.4538	17	17	17	24.8551	24.2512	17	17	17	24.0608	24.4062
Q3UJB9	Enhancer of mRNA-decapping protein 4	Edc4	0.619056	1	-1.18347	0.440291	0.579347	1	-1.39216	0.380994	0.933151	1	-0.208689	0.865323	0.000152135	1	-7.21489	0.00673133	0.45529	1	-2.47038	0.180443	0.373901	0.509242	1.99173	3.97714	0.116197	1	4.46211	22.0409	0.219209	0.518339	-4.46211	0.0453701	1.71364e-06	0.14	7.21489	148.559	17	17	17	22.9752	17	17	17	23.7884	23.598	24.3039	24.1259
P11087	Collagen alpha-1(I) chain	Col1a1	0.636616	1	-1.22769	0.427001	0.675897	1	-1.07794	0.473704	0.899941	1	0.149746	1.10937	0.54889	1	-1.40305	0.378129	0.442306	1	1.21889	2.32768	0.0226566	0.24976	2.40383	5.29208	0.465022	1	1.18494	2.27354	0.85415	0.964416	-0.390505	0.762862	0.211794	0.296977	2.19749	4.58679	17	27.1336	28.2168	26.883	24.7014	26.9021	23.5992	26.7159	28.2615	28.8301	25.5795
Q8JZL3	Thiamine-triphosphatase	Thtpa	0.423281	1	-1.30685	0.404202	0.4622	1	-1.19642	0.436358	0.518719	1	0.110435	1.07955	0.526408	1	0.233822	1.17595	0.102343	1	0.453157	1.36903	0.0584345	0.394822	0.481335	1.39603	0.907721	1	0.0281773	1.01972	0.872509	0.985368	0.0442397	1.03114	0.597487	0.828286	-0.161405	0.894154	17	23.7865	23.9331	24.1882	23.4237	23.697	23.3675	23.8738	23.307	23.0511	23.602
Q70IV5	Synemin	Synm	0.407084	1	-1.37897	0.384493	0.407084	1	-1.50518	0.352287	0.95222	1	-0.126204	0.916239	0.42265	1	-3.76294	0.0736618	0.373901	1	-2.29829	0.203305	NaN	1	0	1	0.373901	1	2.29829	4.91873	0.495025	0.82084	-2.29829	0.203305	0.272228	0.349027	3.76294	13.5756	17	17	17	17	17	17	17	17	23.8949	24.5259	17
P15392	Cytochrome P450 2A4	Cyp2a4	0.641734	1	-1.45289	0.365288	0.645386	1	-1.43326	0.370294	0.994935	1	0.0196381	1.01371	0.924714	1	0.0490952	1.03462	NaN	1	0	1	NaN	1	0	1	NaN	1	0	1	3.59461e-06	0.272	8.6697	407.23	0.000119933	0.172727	8.62061	393.605	25.0599	17	17	17	25.5328	25.8066	17	17	17	25.1817	26.0596
Q9Z2D6	Methyl-CpG-binding protein 2	Mecp2	0.388851	1	-1.51774	0.349232	0.39545	1	-1.51543	0.349791	0.994929	1	0.00230865	1.0016	0.194765	0.918231	-0.464671	0.724636	0.440228	1	-2.08749	0.23529	0.505384	0.593247	-1.77386	0.292425	0.313359	1	0.313629	1.24283	0.330904	0.824927	0.415665	1.33391	0.00537646	0.151462	1.19396	2.28781	24.7925	24.3949	24.1504	17	24.5464	24.1568	23.442	24.2891	24.0767	24.9597	24.6728
Q8VE73	Cullin-7	Cul7	0.407084	1	-1.54207	0.343392	0.407084	1	-1.57533	0.335566	0.988331	1	-0.0332611	0.977209	0.989332	1	-0.0831528	0.943992	NaN	1	0	1	NaN	1	0	1	NaN	1	0	1	0.272228	0.714907	3.85518	14.4719	0.272228	0.346854	3.93833	15.3305	17	17	17	17	17	24.7104	17	17	17	17	24.8767
Q8R326	Paraspeckle component 1	Pspc1	0.390134	1	-1.55706	0.339843	0.437618	1	-1.37133	0.386536	0.897851	1	0.185736	1.1374	0.414887	1	2.59477	6.04093	0.510794	1	-1.66995	0.314264	0.131482	0.376788	-3.09024	0.117421	0.441514	1	-1.42029	0.373638	0.453453	0.812937	1.83785	3.57476	0.336201	0.421203	-2.17721	0.221103	22.0143	21.8667	17	17	22.3277	21.9323	21.6743	22.2023	17	17	22.0705
Q9ESW8	Pyroglutamyl-peptidase 1	Pgpep1	0.295291	1	-1.55852	0.339498	0.369236	1	-1.31787	0.401126	0.249401	1	0.240653	1.18153	0.535721	1	0.0594015	1.04203	0.370095	1	-2.0953	0.234019	0.448085	0.564221	-1.73382	0.300655	0.316353	1	0.361487	1.28475	0.926043	0.983963	0.0364752	1.0256	0.185241	0.469089	0.338561	1.26449	23.2922	22.7041	23.5561	17	23.279	23.1581	23.0252	23.7224	22.7985	23.1065	23.2117
P11152	Lipoprotein lipase	Lpl	0.410169	1	-1.57097	0.336582	0.672147	1	-0.836242	0.560101	0.693207	1	0.734727	1.66408	0.42265	1	-2.93792	0.130496	0.169833	1	-3.05573	0.120263	0.959973	0.959354	0.127427	1.09234	0.135466	1	3.18316	9.08295	0.00584457	0.56637	-4.80554	0.0357592	0.693512	0.781537	1.31554	2.48896	17	17	22.2494	17	17	17	20.7796	22.1069	22.5301	22.8758	17
Q3UPF5	Zinc finger CCCH-type antiviral protein 1	Zc3hav1	0.334061	1	-1.58946	0.332297	0.31772	1	-1.64368	0.32004	0.759959	1	-0.054221	0.963114	0.851345	1	-0.0849962	0.942787	0.391909	1	-2.20945	0.216217	0.38574	0.523064	-2.24315	0.211225	0.880673	1	-0.0337041	0.976909	0.911526	0.982481	-0.0398868	0.972731	0.963833	0.993458	0.0114053	1.00794	24.0143	23.7726	24.0217	17	23.391	24.1444	23.7552	24.0628	23.6047	23.7187	23.9867
O08738	Caspase-6	Casp6	0.270425	1	-1.60081	0.329691	0.325502	1	-1.41799	0.374233	0.423417	1	0.182825	1.1351	0.752944	1	-0.159905	0.895084	0.648988	1	-0.149677	0.901452	0.518253	0.700511	0.261635	1.19884	0.129738	1	0.411311	1.32989	0.748798	0.955133	-0.114697	0.923576	0.20558	0.444702	0.456519	1.37223	17	22.388	23.353	23.2232	23.4566	22.5895	23.1646	23.0637	23.185	23.0898	23.2761
P70297	Signal transducing adapter molecule 1	Stam	0.259533	1	-1.6256	0.324074	0.309024	1	-1.50342	0.352716	0.779016	1	0.122181	1.08838	0.876337	1	0.0275345	1.01927	0.34831	1	-2.13126	0.228258	0.40321	0.546439	-1.94598	0.259538	0.819304	1	0.185279	1.13704	0.987008	0.999465	0.00839996	1.00584	0.860062	0.941841	0.166145	1.12206	22.9732	23.1665	22.6449	17	22.9971	23.1565	23.2698	23.5758	22.3596	22.9149	23.1837
Q9D187	Cytosolic iron-sulfur assembly component 2B	Ciao2b	0.312363	1	-1.64309	0.320169	0.28293	1	-1.75582	0.296105	0.562942	1	-0.112723	0.924841	0.722941	1	-0.140814	0.907007	0.384282	1	-2.18724	0.21957	0.365819	0.464686	-2.28124	0.205721	0.667618	1	-0.0939954	0.936924	0.376809	0.853444	0.272777	1.20813	0.300478	0.581727	0.319595	1.24798	24.083	17	23.6617	23.7483	24.1516	23.7084	23.8208	23.8118	23.3391	23.806	24.3357
Q61239	Protein farnesyltransferase/geranylgeranyltransferase type-1 subunit alpha	Fnta	0.394017	1	-1.66432	0.315494	0.40038	1	-1.63561	0.321834	0.985491	1	0.0287045	1.0201	0.392779	0.971935	2.8367	7.14383	0.535732	1	-1.74375	0.298592	0.12418	0.369843	-3.58704	0.0832132	0.362853	1	-1.84329	0.278685	0.479915	0.823106	1.86729	3.64847	0.245698	0.32204	-2.8127	0.142329	22.153	17	22.5429	17	22.5758	22.3415	22.4756	17	22.2986	22.244	17
Q99JZ7	ERBB receptor feedback inhibitor 1	Errfi1	0.448588	1	-1.72764	0.301946	0.416206	1	-1.86457	0.274604	0.940565	1	-0.136938	0.909448	0.374471	0.931895	3.47109	11.0893	0.892628	1	0.414144	1.33251	0.373757	0.500973	-2.12815	0.228751	0.261338	1	-2.54229	0.17167	0.360133	0.798154	2.70641	6.52696	0.24312	0.310921	-3.30698	0.101042	17	17	23.0484	23.6622	23.3871	23.6712	22.1231	23.345	17	17	23.1161
Q8CIZ8	von Willebrand factor	Vwf	0.43274	1	-1.7294	0.301578	0.520931	1	-1.35985	0.389623	0.827791	1	0.369548	1.29195	0.402183	0.984537	3.15666	8.91765	0.551904	1	-1.85259	0.276895	0.182498	0.390064	-3.34112	0.0986787	0.490948	1	-1.48853	0.356376	0.446239	0.812795	2.2198	4.65829	0.35619	0.43231	-2.42539	0.186159	23.1176	17	23.2196	17	22.9876	23.3035	22.7638	17	23.0136	22.9778	17
O35403	Amine sulfotransferase	Sult3a1	0.669854	1	-1.76686	0.293848	0.669083	1	-1.77176	0.292851	0.999034	1	-0.00490341	0.996607	0.979243	1	-0.0122585	0.991539	NaN	1	0	1	NaN	1	0	1	NaN	1	0	1	3.24888e-05	0.325	11.3172	2551.69	4.2085e-06	0.188	11.3295	2573.47	28.0401	17	17	17	27.9448	28.6897	17	17	17	28.1409	28.5181
P01639	Ig kappa chain V-V region MOPC 41	Gm5571	0.374206	1	-1.79319	0.288533	0.617713	1	-1.08743	0.470598	0.732354	1	0.705761	1.63101	0.712574	1	1.46018	2.75143	0.373901	1	-1.97445	0.254468	0.373901	0.522093	-1.77163	0.292877	0.942729	1	0.202813	1.15094	0.336701	0.81888	2.9167	7.55117	0.661742	0.75352	1.65933	3.1587	22.3917	17	17	17	22.1493	21.633	17	17	22.9233	23.8619	17
Q8BHE8	m-AAA protease-interacting protein 1, mitochondrial	Maip1	0.281452	1	-1.79853	0.287468	0.304114	1	-1.70976	0.30571	0.248486	1	0.088763	1.06346	0.87715	1	0.00874233	1.00608	0.368883	1	-2.39203	0.190514	0.39551	0.527984	-2.24992	0.210235	0.249423	1	0.14211	1.10352	0.03864	0.852485	-0.156153	0.897415	0.875941	0.978162	-0.0227852	0.984331	23.8516	24.1582	17	24.024	23.944	23.9826	24.1723	24.1255	24.0605	24.0006	23.9085
Q8VDU3;Q8C7I4	Apol9a protein;Apolipoprotein L 9b	Apol9a;Apol9b	0.296329	1	-1.81008	0.285175	0.280569	1	-1.86894	0.273774	0.847516	1	-0.0588619	0.960021	0.713509	1	0.0962429	1.06899	0.377414	1	-2.26484	0.208073	0.349032	0.442692	-2.4271	0.185938	0.494781	1	-0.162265	0.893621	0.0139991	0.315816	0.874307	1.83313	0.114923	0.333688	0.615799	1.53241	24.7792	23.968	23.7159	17	24.5308	24.8701	23.9631	23.85	23.6654	24.7559	24.4525
Q9EP96	Solute carrier organic anion transporter family member 1A4	Slco1a4	0.400548	1	-1.82887	0.281485	0.669729	1	-1.07341	0.475196	0.723066	1	0.755462	1.68817	0.477581	1	-0.50844	0.702982	0.506074	1	-2.05353	0.240895	0.890856	0.90412	-0.455464	0.729276	0.638558	1	1.59806	3.02736	0.510015	0.836354	1.96325	3.89938	0.284239	0.370594	4.06975	16.7925	23.0036	17	22.8913	17	22.4495	23.5116	23.3327	17	22.7192	23.7386	23.2393
O09117	Synaptophysin-like protein 1	Sypl1	0.29639	1	-1.83401	0.280483	0.324453	1	-1.72066	0.303411	0.509069	1	0.113357	1.08174	0.26933	1	0.178917	1.13203	0.39141	1	-2.32331	0.199809	0.404533	0.542246	-2.25366	0.209692	0.444191	1	0.0696507	1.04946	0.00897964	0.409246	0.493631	1.40798	0.0408471	0.362782	0.384365	1.30528	24.5848	24.1556	24.3578	17	24.5812	24.7283	24.2345	24.1739	24.0749	24.3833	24.5684
Q6NXN1	SUZ domain-containing protein 1	Szrd1	0.265784	1	-1.85982	0.275511	0.321244	1	-1.621	0.325109	0.429542	1	0.238816	1.18002	0.971489	1	-0.014185	0.990216	0.689254	1	-0.199066	0.871115	0.127933	0.592995	0.208418	1.15542	0.428124	1	0.407483	1.32637	0.819842	0.963543	-0.146547	0.90341	0.395469	0.674109	0.275122	1.2101	17	23.918	23.7275	23.9869	23.9737	23.8863	24.0657	23.2918	24.8722	24.2931	23.5953
Q9Z0E6	Guanylate-binding protein 2	Gbp2	0.427875	1	-1.97534	0.25431	0.439876	1	-1.91319	0.265504	0.975305	1	0.0621426	1.04402	0.907507	1	0.036334	1.0255	0.547556	1	-1.9615	0.256761	0.558614	0.636838	-1.88215	0.271278	0.979433	1	0.0793482	1.05654	0.313853	0.819816	3.22855	9.37327	0.299632	0.384467	3.27157	9.65694	24.2656	17	23.4659	17	24.3611	24.3296	17	22.7714	23.579	24.5851	24.0329
Q9QWK4	CD5 antigen-like	Cd5l	0.400696	1	-1.99112	0.251544	0.38621	1	-2.07573	0.237216	0.96934	1	-0.0846127	0.943038	0.0850883	0.603215	-0.68193	0.623331	0.373901	1	-2.27101	0.207184	0.373901	0.512398	-1.95741	0.25749	0.921731	1	0.313599	1.2428	0.330275	0.828125	3.3985	10.5451	0.181071	0.171326	4.39403	21.025	23.5572	17	17	17	22.6817	22.6573	17	17	23.813	23.5638	23.1391
Q61878	Bone marrow proteoglycan	Prg2	0.417669	1	-2.00932	0.24839	0.442295	1	-1.86311	0.274882	0.947254	1	0.146207	1.10666	0.771047	1	0.174165	1.12831	0.373901	1	-2.06895	0.238332	0.373901	0.512276	-1.94138	0.260366	0.966292	1	0.127569	1.09245	0.210541	0.490742	4.2516	19.0485	0.195012	0.186532	4.20501	18.4431	24.0411	17	17	17	23.0663	23.5748	17	17	23.2069	22.6887	23.6041
A0A075B5Y4	Ig-like domain-containing protein	Ighv1-81	0.358063	1	-2.1325	0.228062	0.359761	1	-2.10411	0.232595	0.9896	1	0.0283947	1.01988	0.680601	1	-0.221564	0.857635	0.373901	1	-2.18907	0.219293	0.373901	0.508291	-1.99404	0.251036	0.950646	1	0.195034	1.14475	0.288053	0.770789	3.66588	12.6923	0.211161	0.212649	4.08248	16.9414	23.0917	17	17	17	23.3041	22.4058	17	17	23.5672	22.9568	23.1962
Q8VDC0	Probable leucine--tRNA ligase, mitochondrial	Lars2	0.400324	1	-2.19341	0.218635	0.433077	1	-2.0087	0.248497	0.929161	1	0.184708	1.13659	0.409414	0.983639	3.71499	13.1318	0.996328	1	0.0165335	1.01153	0.419685	0.549766	-2.15228	0.224957	0.414676	1	-2.16881	0.222393	0.47047	0.820753	2.53588	5.79931	0.29967	0.384816	-3.34793	0.0982141	17	24.0081	24.3389	17	24.4403	24.1631	24.2196	24.0778	17	17	24.1734
Q8BXV2	BRI3-binding protein	Bri3bp	NaN	1	0	1	0.0679947	1	-3.34541	0.0983854	0.0402601	1	-3.34541	0.0983854	NaN	1	0	1	NaN	1	0	1	3.47715e-06	0.219333	-5.57569	0.0209677	3.47715e-06	0.424	-5.57569	0.0209677	NaN	1	0	1	9.95904e-05	0.213481	-5.57569	0.0209677	17	17	17	17	17	17	17	17	17	17	17
Q9JHK5	Pleckstrin	Plek	NaN	1	0	1	0.06784	1	-7.0308	0.00764749	0.0401504	1	-7.0308	0.00764749	0.42265	1	-5.64172	0.0200297	NaN	1	0	1	0.116269	0.283689	-7.95685	0.00402485	0.116269	1	-7.95685	0.00402485	NaN	1	0	1	0.750385	0.829129	-2.31513	0.200944	17	17	17	17	17	17	17	17	17	17	28.2834
P53612	Geranylgeranyl transferase type-2 subunit beta	Rabggtb	0.345028	1	2.23705	4.71432	0.277787	1	-1.634	0.322194	0.0349022	1	-3.87105	0.0683437	0.444814	1	-3.06447	0.119537	0.489597	1	2.18715	4.55406	0.347065	0.442441	-2.22161	0.214402	0.0905146	1	-4.40877	0.0470792	0.747	0.918277	1.24212	2.36547	0.749453	0.911187	-0.102173	0.931628	23.3576	23.2666	23.2452	17	17	23.4511	17	22.9503	17	22.924	23.656
P28700;P28705	Retinoic acid receptor RXR-alpha;Retinoic acid receptor RXR-gamma	Rxra;Rxrg	0.344858	1	2.08768	4.25063	0.352534	1	-1.29662	0.40708	0.044905	1	-3.38429	0.0957693	0.900656	1	-0.0582285	0.960443	0.116565	1	3.87148	14.6363	0.423289	0.558086	-1.73019	0.301412	7.62587e-07	0.364	-5.60167	0.0205935	6.82125e-06	0.6384	5.78353	55.0828	0.514395	0.753411	0.240089	1.18107	22.9899	17	22.6122	23.0022	22.8966	22.6704	17	17	17	22.4452	23.2384
Q9DBB9	Carboxypeptidase N subunit 2	Cpn2	0.896112	1	0.273547	1.20878	0.111291	1	-3.73145	0.0752871	0.0637001	1	-4.005	0.0622838	0.42265	1	-3.53191	0.0864549	0.373901	1	-2.16637	0.22277	1.68357e-06	0.1568	-6.48677	0.0111504	0.117508	1	-4.32039	0.0500532	0.495025	0.819509	-2.16637	0.22277	0.3445	0.418328	-2.95486	0.128973	23.2935	17	17	17	17	17	17	17	23.4991	24.0638	17
O88653	Ragulator complex protein LAMTOR3	Lamtor3	0.930604	1	-0.169738	0.889004	0.179936	1	-2.02625	0.245493	0.168759	1	-1.85651	0.276143	0.0639117	0.561224	-0.651845	0.636466	0.982891	1	-0.0617154	0.958124	0.234343	0.38961	-2.72134	0.151634	0.262825	1	-2.65962	0.158261	0.478968	0.822998	2.04514	4.12713	0.962662	0.989372	0.0373615	1.02624	23.5522	17	22.3271	22.809	22.9382	22.6996	21.7225	17	23.5987	23.5963	23.3452
Q3TIU4	2,5-phosphodiesterase 12	Pde12	0.847477	1	-0.560396	0.678116	0.13432	1	-3.29288	0.102034	0.165592	1	-2.73248	0.150467	0.442532	1	-3.45599	0.0911265	0.955158	1	0.211505	1.1579	0.469992	0.570929	-2.03864	0.243393	0.408929	1	-2.25014	0.210203	0.782537	0.936866	-1.25312	0.419539	0.848073	0.960626	-0.0472819	0.967758	17	17	24.2403	25.0375	17	24.2559	24.4103	24.233	17	23.797	24.3709
Q3U186	Probable arginine--tRNA ligase, mitochondrial	Rars2	0.774197	1	-0.649851	0.637346	0.0953016	1	-2.79785	0.143801	0.173208	1	-2.148	0.225625	0.29918	1	0.348823	1.27352	0.510164	1	1.93199	3.81582	0.380599	0.521517	-1.88056	0.271578	0.112558	1	-3.81255	0.0711716	0.192252	0.460824	4.07405	16.8427	0.608667	0.887587	-0.0873251	0.941266	17	17	22.5609	22.8658	23.2011	22.7008	22.6307	17	17	22.6234	22.5809
Q8N9S3	Activator of 90 kDa heat shock protein ATPase homolog 2	Ahsa2	0.430572	1	1.71434	3.28147	0.409875	1	-1.77466	0.292264	0.0771931	1	-3.489	0.089065	0.42265	1	-3.23356	0.106317	0.546474	1	1.87477	3.66743	0.421816	0.556261	-1.78452	0.290272	0.152861	1	-3.65929	0.0791488	0.495025	0.818356	-2.0551	0.240632	0.384301	0.445923	-2.48083	0.179141	17	23.2104	22.5793	17	17	17	17	23.1653	17	17	23.4671
Q8BIJ7	RUN and FYVE domain-containing protein 1	Rufy1	0.54375	1	1.19534	2.28999	0.355386	1	-1.24056	0.423207	0.0863254	1	-2.43591	0.184807	0.275327	0.958596	-0.663239	0.631459	0.484297	1	1.92827	3.80599	0.407127	0.54816	-1.68941	0.310053	0.102531	1	-3.61769	0.0814645	0.236141	0.600217	3.27671	9.69141	0.363403	0.623036	0.32226	1.25029	22.954	22.673	22.2559	17	21.8006	22.1823	17	17	22.1442	22.2516	23.0577
P32883	GTPase KRas	Kras	0.66719	1	0.972637	1.96242	0.324014	1	-1.4526	0.365363	0.145389	1	-2.42524	0.186179	0.760377	1	-0.0718222	0.951436	0.485623	1	2.13815	4.40198	0.414525	0.549742	-1.85603	0.276236	0.107121	1	-3.99418	0.0627527	0.177227	0.452239	4.33929	20.2421	0.317995	0.518018	0.416934	1.33509	23.3318	23.0276	23.1255	17	23.3279	23.1765	17	22.7386	17	23.5153	23.1327
Q8VI94	2-5-oligoadenylate synthase-like protein 1	Oasl1	0.78493	1	0.520556	1.43451	0.216364	1	-1.50885	0.35139	0.160911	1	-2.02941	0.244955	0.855532	1	0.0929098	1.06652	0.553408	1	1.4757	2.78119	0.280745	0.390248	-1.96859	0.255503	0.108366	1	-3.44429	0.0918684	0.175637	0.454478	3.79248	13.8564	0.562757	0.773373	0.25528	1.19357	22.3835	17	21.7475	21.661	22.2703	22.6355	17	21.9813	17	21.9487	22.7713
Q4KML4	Costars family protein ABRACL	Abracl	0.198203	1	-0.515862	0.699375	0.00548615	1	-1.16242	0.446764	0.125745	1	-0.646553	0.638805	0.187629	0.897762	-0.494343	0.709885	0.170955	1	-0.842269	0.557766	0.00323108	0.312	-1.5903	0.332103	0.254385	1	-0.748027	0.595417	0.541256	0.856747	-0.449691	0.7322	0.150802	0.357493	-0.703375	0.614134	24.6543	24.0043	24.128	24.0721	24.3713	24.5502	25.8547	24.132	24.7445	25.1895	24.7206
F6TQW2;P01864	Immunoglobulin heavy constant gamma 2C;Ig gamma-2A chain C region secreted form	Ighg2c;-	0.527766	1	1.67374	3.1904	0.158649	1	-1.15855	0.447963	0.241021	1	-2.83228	0.14041	0.407644	1	-0.963855	0.512685	0.468906	1	2.86732	7.29708	0.210825	0.39053	-1.21059	0.432093	0.321573	1	-4.07791	0.0592145	0.44724	0.820541	4.00643	16.0715	0.453673	0.568271	0.892382	1.85624	27.62	26.3357	26.6302	24.9861	27.4845	26.7617	17	23.0477	29.3023	28.9406	27.2333
Q3TBW2	39S ribosomal protein L10, mitochondrial	Mrpl10	0.74039	1	-0.657391	0.634024	0.150716	1	-2.17766	0.221034	0.28236	1	-1.52027	0.348621	0.796951	1	-0.212268	0.863179	0.86835	1	-0.514462	0.700054	0.220402	0.392537	-2.90673	0.133348	0.347606	1	-2.39227	0.190483	0.619296	0.858174	1.5563	2.94099	0.532179	0.674248	-0.623699	0.649005	22.7591	22.4755	17	23.0467	22.9838	22.8391	23.2727	17	23.7928	23.8439	22.4036
Q19LI2	Alpha-1B-glycoprotein	A1bg	0.361835	1	2.44808	5.45691	0.735283	1	-0.855756	0.552576	0.206209	1	-3.30384	0.101262	0.551413	1	-1.23921	0.423604	2.44501e-07	0.636	7.0476	132.293	0.369331	0.472779	2.36734	5.15989	0.116117	1	-4.68026	0.0390034	0.000130528	0.506462	7.09404	136.621	0.346316	0.415655	3.65299	12.5794	17	24.2153	23.8688	24.0587	24.4656	23.7224	17	17	17	27.039	23.6275
Q61292	Laminin subunit beta-2	Lamb2	0.715724	1	0.952348	1.93502	0.538883	1	-1.33447	0.396538	0.32781	1	-2.28682	0.204927	0.357352	0.882135	-4.92791	0.0328512	0.530883	1	2.01151	4.03205	0.279641	0.393883	1.48543	2.8	0.860818	1	-0.526089	0.694435	0.799739	0.93939	-1.15342	0.449557	0.258534	0.334424	3.2484	9.5031	17	21.2652	24.822	23.1592	17	22.8344	19.9025	17	26.3094	27.8028	21.8874
Q8CB59	Protein FAM161B	Fam161b	0.292352	1	0.913268	1.88331	0.635559	1	-1.31064	0.403141	0.346594	1	-2.22391	0.21406	NaN	1	0	1	NaN	1	0	1	0.373901	0.457394	-3.70652	0.0765995	0.373901	1	-3.70652	0.0765995	NaN	1	0	1	0.495025	0.528396	-3.70652	0.0765995	20.6531	17	17	17	17	17	17	17	17	17	17
G5E895	Aldo-keto reductase family 1, member B10 (aldose reductase)	Akr1b10	0.700249	1	0.833747	1.78231	0.529658	1	-1.19498	0.436792	0.323036	1	-2.02873	0.245071	0.0914737	0.557	-5.95716	0.016096	0.846456	1	0.610041	1.5263	0.508505	0.608823	1.20026	2.29781	0.829523	1	0.590221	1.50548	0.495025	0.822547	-2.50811	0.175786	0.0871501	0.134824	4.03927	16.4415	17	17	21.7648	21.5897	17	17	17	17	24.5243	24.8944	21.0199
E9QMW4	Uncharacterized protein C16orf96 homolog	MGI:1926059	0.806918	1	0.586242	1.50133	0.399548	1	-1.99704	0.250514	0.299486	1	-2.58328	0.166861	0.42265	1	-3.87018	0.0683847	0.712119	1	-0.486362	0.713823	0.000738486	0.372	-2.21171	0.215879	0.234402	1	-1.72535	0.302426	0.0274773	0.374979	-6.34009	0.0123436	0.243146	0.305321	-4.19525	0.0545887	17	22.8482	22.6073	23.1057	17	17	25.6434	21.4975	22.8794	24.7404	17
Q9QZ08	N-acetyl-D-glucosamine kinase	Nagk	0.860376	1	0.50084	1.41504	0.359889	1	-2.39077	0.19068	0.255705	1	-2.89161	0.134753	0.494572	1	-3.35838	0.0975052	0.965976	1	0.151922	1.11105	0.520641	0.601246	-2.42852	0.185756	0.48377	1	-2.58044	0.16719	0.704502	0.888533	1.7641	3.39663	0.478999	0.517373	2.54204	5.82413	23.6599	24.3251	17	17	17	25.1077	17	17	23.8693	24.3637	24.4608
O88322	Nidogen-2	Nid2	0.88109	1	0.389718	1.31014	0.423849	1	-1.84767	0.277841	0.327365	1	-2.23739	0.21207	0.02825	0.814609	-6.39776	0.0118599	0.904862	1	-0.400827	0.757424	0.965349	0.96338	0.135366	1.09837	0.871065	1	0.536194	1.45014	0.224991	0.559661	-4.60226	0.0411702	0.458719	0.499499	2.3317	5.03397	17	17	23.6026	23.0016	17	17	23.17	17	24.6367	24.4965	22.299
P15508	Spectrin beta chain, erythrocytic	Sptb	0.915752	1	0.372278	1.2944	0.454732	1	-2.03745	0.243594	0.42998	1	-2.40973	0.188192	0.487119	1	-4.86565	0.0343001	0.763013	1	-1.30764	0.403981	0.448551	0.564348	-2.08009	0.2365	0.845894	1	-0.772446	0.585424	0.978154	0.99221	-0.173093	0.886939	0.251424	0.315332	3.92011	15.138	27.2897	21.3907	24.1504	17	26.9631	17	17	20.695	28.769	29.7364	23.958
A0A140T8M3;A0A075B5N4;A0A140T8P7	Ig-like domain-containing protein	Igkv8-30;Igkv8-27	0.886093	1	0.315988	1.24486	0.72159	1	-0.852726	0.553737	0.587192	1	-1.16871	0.444818	0.00945676	0.866824	-6.31332	0.0125748	0.373901	1	-2.26102	0.208624	NaN	1	0	1	0.373901	1	2.26102	4.79331	0.495025	0.821986	-2.26102	0.208624	0.000841779	0.303758	6.31332	79.524	23.6904	17	17	17	17	17	17	17	23.7831	23.9317	22.695
Q91VC4	Plasmalemma vesicle-associated protein	Plvap	0.870141	1	0.280895	1.21495	0.40705	1	-1.56969	0.33688	0.275434	1	-1.85059	0.277279	0.457175	1	-2.39806	0.18972	NaN	1	0	1	0.373901	0.528844	-1.48561	0.357097	0.373901	1	-1.48561	0.357097	0.272228	0.761909	2.60387	6.07915	0.166429	0.169736	3.51631	11.4424	22.2898	17	17	17	17	22.2077	17	17	17	21.6814	22.3224
A0A140T8M5	Ig-like domain-containing protein	Igkv6-15	0.957001	1	0.132732	1.09637	0.693884	1	-1.00189	0.499344	0.638555	1	-1.13463	0.455453	0.42265	1	-3.59486	0.0827639	0.373901	1	-2.67525	0.156555	0.373901	0.497542	-2.16973	0.222253	0.890419	1	0.505528	1.41964	0.495025	0.821689	-2.67525	0.156555	0.737539	0.820901	1.42513	2.68539	23.9515	17	17	17	17	17	17	17	25.0258	24.1897	17
Q8CC35	Synaptopodin	Synpo	NaN	1	0	1	0.407084	1	-1.22269	0.428483	0.346594	1	-1.22269	0.428483	0.42265	1	-3.05673	0.12018	NaN	1	0	1	NaN	1	0	1	NaN	1	0	1	NaN	1	0	1	0.272228	0.36506	3.05673	8.32082	17	17	17	17	17	17	17	17	17	23.1135	17
P15327	Bisphosphoglycerate mutase	Bpgm	0.986984	1	-0.0294429	0.979799	0.35247	1	-1.14023	0.453686	0.465545	1	-1.11079	0.46304	0.538109	1	-2.01474	0.247459	0.701809	1	-0.847067	0.555914	0.190329	0.388788	-1.35522	0.390874	0.810225	1	-0.508158	0.70312	0.954003	0.98495	0.193498	1.14353	0.211566	0.312303	1.70008	3.24919	27.3378	23.3684	25.1629	22.7419	27.2578	22.3388	22.2061	23.1929	28.4154	28.0107	25.6154
Q6IMF0	Keratin, type II cuticular 87	Krt87	0.975656	1	-0.0829215	0.944144	0.680363	1	-1.30005	0.406113	0.653803	1	-1.21713	0.430139	0.126706	0.525191	-1.26102	0.417249	0.365962	1	3.16556	8.97281	0.641219	0.688411	1.9777	3.93864	0.754379	1	-1.18786	0.438953	0.128502	0.354229	4.992	31.8231	0.286525	0.366832	5.06516	33.4784	17	24.4853	24.5349	17	23.4358	24.2305	17	17	22.5235	24.7949	25.3935
Q9EQW4	Cytochrome P450, CYP3A	Cyp3a44	0.963614	1	-0.094311	0.936719	0.537461	1	-1.48454	0.357362	0.55324	1	-1.39023	0.381503	0.438525	1	-3.47558	0.0898971	0.373901	1	1.77493	3.42222	0.373901	0.520814	1.77493	3.42222	NaN	1	0	1	0.272228	0.735345	3.56377	11.825	0.000696551	0.27925	7.03935	131.54	17	22.3248	17	17	17	24.1275	17	17	17	23.3926	24.6861
P00687	Alpha-amylase 1	Amy1	0.863124	1	-0.330863	0.795061	0.248752	1	-1.61756	0.325886	0.306352	1	-1.2867	0.409888	0.404364	0.988537	-3.10885	0.115916	0.397331	1	-1.88382	0.270966	0.381784	0.52433	-1.95575	0.257787	0.526163	1	-0.0719318	0.951363	0.280967	0.771466	-2.89669	0.134279	0.429608	0.788535	0.140225	1.10208	22.5525	17	23.107	22.8191	22.925	17	22.8375	22.906	22.834	23.1811	22.9616
Q3T9X0	Solute carrier family 2, facilitated glucose transporter member 9	Slc2a9	0.854314	1	-0.335226	0.79266	0.324043	1	-1.29559	0.407369	0.419445	1	-0.960365	0.513927	0.474003	1	0.0571957	1.04044	0.944922	1	-0.194656	0.873781	0.37399	0.516227	-1.8334	0.280603	0.443731	1	-1.63874	0.321137	0.563648	0.850803	1.60416	3.04018	0.747834	0.913702	-0.0917768	0.938366	22.6494	22.5422	22.3928	17	22.4619	22.4257	22.8148	22.7042	17	22.3238	22.4494
A2AQ07	Tubulin beta-1 chain	Tubb1	0.872648	1	-0.338067	0.791101	0.430576	1	-1.5749	0.335666	0.484408	1	-1.23683	0.424303	0.871536	1	-0.695312	0.617576	0.445344	1	-2.0333	0.244296	0.0791782	0.269811	-3.63115	0.0807079	0.436976	1	-1.59785	0.330369	0.696903	0.887304	-1.26134	0.417156	0.407609	0.465101	-2.16388	0.223156	23.3044	17	21.6248	17	17	21.6271	21.5704	17	23.1543	23.0177	17
Q9D1C8	Vacuolar protein sorting-associated protein 28 homolog	Vps28	0.886828	1	-0.340061	0.790008	0.284809	1	-1.86035	0.27541	0.328232	1	-1.52029	0.348616	0.434472	1	-0.172029	0.887593	0.377623	1	2.42556	5.37236	0.970668	0.986579	0.0064284	1.00447	0.378832	1	-2.41913	0.186969	0.510517	0.836192	2.35164	5.10402	0.549461	0.864508	0.104537	1.07515	17	24.0777	24.4356	24.3862	24.0488	24.403	23.992	24.6308	17	24.4085	24.3875
Q9D3I6	Keratin-associated protein 7-1	Krtap7-1	0.897614	1	-0.349133	0.785056	0.683198	1	-1.25144	0.420029	0.737029	1	-0.902306	0.535031	0.0525107	0.519059	-1.17507	0.442862	0.491415	1	2.54118	5.82065	0.664186	0.712184	1.82072	3.53257	0.859609	1	-0.720464	0.606902	0.256278	0.636695	4.18927	18.243	0.321965	0.392614	4.64388	25.0004	17	24.1096	24.4657	17	23.3283	23.6847	17	17	23.9517	24.4651	24.8981
Q8BG07	5-3 exonuclease PLD4	Pld4	0.859233	1	-0.382551	0.76708	0.26055	1	-1.78426	0.290324	0.321401	1	-1.40171	0.37848	0.857121	1	-0.090806	0.938998	0.927853	1	-0.288972	0.818485	0.280858	0.393635	-2.56462	0.169033	0.359103	1	-2.27565	0.206519	0.495106	0.821425	2.19435	4.57682	0.981151	0.99568	0.0095005	1.00661	24.2257	17	22.9073	23.3598	23.2981	23.8466	17	23.5967	23.5373	23.313	24.0133
O55013	Trafficking protein particle complex subunit 3	Trappc3	0.857939	1	-0.395952	0.759988	0.289391	1	-1.69462	0.308936	0.368417	1	-1.29867	0.406501	0.91756	1	-0.0349684	0.976053	0.979881	1	-0.0859934	0.942136	0.377564	0.508251	-2.22713	0.213583	0.402704	1	-2.14114	0.226701	0.521629	0.838384	2.13815	4.40196	0.902544	0.978154	0.0319802	1.02241	23.6701	23.7078	23.759	17	23.8047	23.6214	23.9646	23.7601	17	23.4635	24.0325
P25976	Nucleolar transcription factor 1	Ubtf	0.82678	1	-0.51081	0.701828	0.269319	1	-1.8665	0.274238	0.379212	1	-1.35569	0.390748	0.37187	1	-0.123241	0.918123	0.9798	1	-0.088239	0.94067	0.380556	0.512109	-2.26556	0.207969	0.405486	1	-2.17732	0.221086	0.43326	0.824423	2.72458	6.60968	0.0583554	0.17714	0.670504	1.59163	24.2552	23.7283	24.0303	17	24.4791	24.3189	23.9294	24.0939	17	24.4499	24.5946
P55292	Desmocollin-2	Dsc2	0.79835	1	-0.573668	0.671906	0.302991	1	-1.64914	0.31883	0.462552	1	-1.07547	0.474515	0.300805	1	0.134125	1.09743	0.92892	1	-0.303232	0.810435	0.376707	0.508276	-2.1851	0.219897	0.463202	1	-1.88187	0.271332	0.497348	0.818186	2.30567	4.94397	0.187432	0.505532	0.289675	1.22236	23.9404	24.1183	17	22.8808	23.8684	24.0155	17	23.8532	24.0556	23.7446	23.8711
Q8VHG0	Dimethylaniline monooxygenase [N-oxide-forming] 4	Fmo4	0.776579	1	-0.648353	0.638008	0.307109	1	-1.65479	0.317584	0.513622	1	-1.00643	0.497775	0.312809	1	0.582837	1.49779	0.965815	1	-0.131002	0.913197	0.330197	0.418198	-2.19695	0.218098	0.381002	1	-2.06595	0.238829	0.275855	0.751168	3.58909	12.0344	0.104347	0.184397	0.940306	1.91894	24.6162	22.9804	22.8486	17	24.4859	24.8404	22.3072	23.9149	17	23.6823	24.4783
A2AU72	Armadillo repeat-containing protein 3	Armc3	0.848675	1	-0.747191	0.595763	0.283018	1	-3.02797	0.1226	0.37186	1	-2.28078	0.205786	0.430186	1	0.245879	1.18582	0.380511	1	3.9105	15.0376	0.493713	0.858193	-0.054718	0.962783	0.374489	1	-3.96522	0.064025	0.469135	0.809256	4.23695	18.856	0.891123	0.977741	0.0258532	1.01808	17	28.9663	28.7289	28.8597	29.2796	29.0766	28.9301	17	28.8933	28.7029	29.1615
A0A075B5M7	Ig-like domain-containing protein	Igkv5-39	0.94939	1	-0.15702	0.896876	0.734686	1	-0.947008	0.518707	0.742715	1	-0.789988	0.578349	0.193987	0.602128	-2.24751	0.210588	0.934301	1	-0.259499	0.835378	0.979339	0.979625	-0.0778084	0.947496	0.954758	1	0.18169	1.13421	0.342706	0.821027	3.23184	9.39467	0.132174	0.137837	5.66104	50.599	24.5384	22.8727	17	17	22.8035	22.0944	17	17	23.6512	25.8083	23.5845
Q9JHU9	Inositol-3-phosphate synthase 1	Isyna1	0.892167	1	-0.371124	0.77318	0.712087	1	-0.867766	0.547995	0.846303	1	-0.496642	0.708755	NaN	1	0	1	0.661184	1	-1.55029	0.341441	0.301289	0.395622	-2.37803	0.192372	0.77731	1	-0.827736	0.563413	0.222903	0.516884	-5.27729	0.0257856	0.00443916	0.240692	-6.10502	0.014528	17	23.3206	21.8604	17	17	17	24.2415	25.5903	17	17	17
Q60953	Protein PML	Pml	0.0365204	1	-1.04791	0.48367	0.398601	1	-0.312593	0.805193	0.0867225	1	0.735313	1.66476	0.541989	1	-0.296976	0.813957	0.0141399	1	-1.59227	0.331649	0.404352	0.714783	-0.168767	0.889603	0.0146632	0.9112	1.42351	2.68237	0.233555	0.825938	-0.789609	0.578501	0.00260963	0.141628	0.930874	1.90643	25.4695	24.6346	24.8071	24.2246	24.9617	25.7546	26.7031	25.5257	26.2145	25.5605	25.7497
E9Q7R9	Cilia- and flagella-associated protein 43	Cfap43	0.709674	1	-0.904626	0.534171	0.766354	1	-0.684542	0.622203	0.921107	1	0.220084	1.1648	0.42265	1	-3.05327	0.120469	0.54352	1	-2.06992	0.238173	0.915847	0.92759	0.332398	1.2591	0.452753	1	2.40232	5.28652	0.219992	0.528414	-4.31876	0.0501098	0.757512	0.844519	1.13682	2.19896	17	23.7465	17	17	17	17	23.7445	17	23.2118	23.1065	17
Q9D1H9	Microfibril-associated glycoprotein 4	Mfap4	0.620609	1	-0.984382	0.505442	0.71169	1	-0.773474	0.585007	0.888034	1	0.210908	1.15742	0.147738	0.530696	-1.69608	0.308623	0.911023	1	-0.356864	0.78086	0.680192	0.727585	1.12537	2.18158	0.417201	1	1.48224	2.79381	0.605802	0.855346	1.212	2.31659	0.00475112	0.229123	4.39032	20.971	21.4757	17	24.6512	24.4885	23.2562	23.9747	21.1788	20.417	25.6146	25.9541	24.669
P11672	Neutrophil gelatinase-associated lipocalin	Lcn2	0.668114	1	-1.08346	0.471895	0.752382	1	-0.740989	0.598329	0.884956	1	0.342472	1.26793	0.42265	1	-2.31005	0.201653	0.12646	1	-4.5572	0.0424763	0.373901	0.48022	-2.44637	0.183471	0.568752	1	2.11082	4.31938	0.232627	0.574317	-4.5572	0.0424763	0.97215	0.991931	-0.136321	0.909836	23.6034	17	17	17	17	17	22.7278	24.9438	17	17	21.6201
P47877	Insulin-like growth factor-binding protein 2	Igfbp2	0.0112372	1	4.09055	17.0364	0.636611	1	0.933465	1.90986	0.0400587	1	-3.15709	0.112104	0.42265	1	-2.62136	0.162514	0.116301	1	3.65046	12.5573	0.959733	0.958429	0.136223	1.09902	0.116393	1	-3.51423	0.0875205	NaN	1	0	1	0.785112	0.873021	-0.892873	0.538541	22.4108	22.3576	22.5937	17	17	17	17	17	17	17	22.2427
Q8BH04	Phosphoenolpyruvate carboxykinase [GTP], mitochondrial	Pck2	0.0897428	1	2.64126	6.23877	0.851875	1	-0.375543	0.770815	0.0401924	1	-3.0168	0.123552	0.42265	1	-2.57596	0.167709	0.373901	1	1.83958	3.57906	0.584521	0.660036	-1.47112	0.360703	0.116647	1	-3.3107	0.100781	NaN	1	0	1	0.814877	0.895572	-0.734733	0.600929	22.0463	17	22.5187	17	17	17	17	17	17	17	22.1519
Q9CPT5	Nucleolar protein 16	Nop16	0.010699	1	5.06541	33.4842	0.356016	1	1.39878	2.63679	0.0741684	1	-3.66663	0.0787472	0.42265	1	-3.15386	0.112355	0.130556	1	4.08979	17.0275	0.744172	0.867788	0.0813173	1.05798	0.135011	1	-4.00847	0.062134	0.495025	0.819243	-2.14361	0.226312	0.292284	0.381402	-2.99823	0.125154	23.7061	23.4067	22.7958	23.4978	17	17	17	23.4308	17	17	23.3077
Q8BUY5	Complex I assembly factor TIMMDC1, mitochondrial	Timmdc1	0.150302	1	2.80763	7.00135	0.229643	1	0.237958	1.17932	0.132038	1	-2.56968	0.168442	0.407783	0.994627	-3.26558	0.103983	0.295943	1	2.49907	5.65322	0.191845	0.533715	0.393333	1.31342	0.36884	1	-2.10574	0.232332	0.797442	0.93983	-0.99694	0.501062	0.536492	0.800839	0.162901	1.11954	23.2768	23.9531	23.3522	23.6077	23.2833	17	17	23.4285	22.9873	23.4372	23.3773
Q5M8N4	Epimerase family protein SDR39U1	Sdr39u1	0.186589	1	2.73195	6.64354	0.467515	1	-0.34995	0.784611	0.104209	1	-3.0819	0.118101	0.394821	0.976518	-3.62467	0.081071	0.37975	1	2.24664	4.74577	0.387896	0.589102	-0.473417	0.720257	0.302404	1	-2.72006	0.151768	0.7601	0.924036	-1.26862	0.415057	0.700076	0.825672	-0.364005	0.777004	23.6753	23.2443	24.0807	23.9665	17	23.4972	17	23.5502	24.0014	24.7756	22.971
Q924X2	Carnitine O-palmitoyltransferase 1, muscle isoform	Cpt1b	0.176888	1	5.25978	38.3134	0.657577	1	1.69584	3.23966	0.337109	1	-3.56394	0.0845567	0.42265	1	-6.09972	0.0145815	0.191719	1	6.22139	74.6149	0.230094	0.387919	4.34797	20.3643	0.727226	1	-1.87342	0.272926	0.495025	0.825916	-3.95823	0.0643359	0.967319	0.98906	0.268064	1.20419	17	27.2102	26.7614	27.5673	17	17	17	17	28.8747	29.1994	17
P02469	Laminin subunit beta-1	Lamb1	0.118229	1	4.85742	28.9886	0.365601	1	3.02555	8.14293	0.526422	1	-1.83187	0.280901	0.42265	1	-4.72942	0.0376966	0.503283	1	2.99634	7.97974	0.483073	0.574133	3.09618	8.5515	0.98107	1	0.0998351	1.07165	0.495025	0.822065	-2.84608	0.139073	0.718146	0.798267	1.98317	3.95362	25.733	25.7447	17	25.7826	17	17	17	17	25.5382	26.4588	17
P00683	Ribonuclease pancreatic	Rnase1	0.100542	1	4.47114	22.1793	0.321563	1	3.05115	8.28872	0.346594	1	-1.41999	0.373714	NaN	1	0	1	0.133248	1	5.96152	62.3157	0.414958	0.539179	3.59487	12.0827	0.373901	1	-2.36666	0.193894	NaN	1	0	1	0.495025	0.559785	-2.36666	0.193894	17	17	27.8143	24.0703	17	17	17	17	17	17	17
Q61508	Extracellular matrix protein 1	Ecm1	0.0745842	1	3.65891	12.6311	0.419161	1	1.22316	2.33458	0.252415	1	-2.43574	0.184828	0.425767	1	-3.13912	0.113509	0.136191	1	3.8912	14.8377	0.397764	0.541017	1.92437	3.79572	0.535992	1	-1.96683	0.255815	0.788527	0.943362	1.04383	2.0617	0.463254	0.505801	2.21612	4.64643	23.7168	23.1926	23.0644	22.6705	23.257	17	17	17	23.2539	23.7447	22.7905
P14602	Heat shock protein beta-1	Hspb1	0.139955	1	3.63673	12.4384	0.284961	1	1.95934	3.88885	0.477148	1	-1.67739	0.312647	0.270182	0.708632	-6.91343	0.00829564	0.204631	1	2.18344	4.54237	0.0282104	0.266783	3.99675	15.9639	0.270482	1	1.8133	3.51446	0.191228	0.458382	-5.14407	0.02828	0.228839	0.292808	3.58266	11.9809	25.4905	26.2599	29.1563	28.3073	24.1607	17	24.1979	24.9789	27.9964	30.3487	24.6389
P00688;E9PV85	Pancreatic alpha-amylase;Aamy domain-containing protein	Amy2;Amy2a1	0.191075	1	3.54556	11.6767	0.215615	1	2.62004	6.14765	0.676595	1	-0.925526	0.526489	0.279898	0.775597	3.3938	10.5108	0.108132	1	6.29936	78.7582	0.363778	0.460408	2.49428	5.63447	0.233814	1	-3.80508	0.0715414	0.187392	0.453407	5.10187	34.3413	0.463932	0.508434	-2.09701	0.233742	26.2818	26.3818	32.9896	28.0305	28.1067	27.7662	20.2998	20.7354	27.4686	22.2366	26.8488
Q9DBS1	Transmembrane protein 43	Tmem43	0.0874585	1	3.36539	10.3058	0.337926	1	2.0854	4.24393	0.473754	1	-1.27999	0.411799	0.904917	1	-0.522167	0.696325	0.116289	1	3.93903	15.3379	0.463388	0.565465	2.15382	4.45006	0.373901	1	-1.7852	0.290135	0.272228	0.766417	2.45983	5.50151	0.733418	0.818988	1.19679	2.29229	22.5802	17	22.7854	23.0317	17	21.9197	17	17	17	22.964	17
Q8CGN5	Perilipin-1	Plin1	0.0908242	1	3.00131	8.00725	0.495847	1	1.59059	3.01173	0.346594	1	-1.41072	0.376125	0.42265	1	-3.52679	0.0867622	0.118566	1	4.00174	16.0193	0.118566	0.350532	4.00174	16.0193	NaN	1	0	1	NaN	1	0	1	0.272228	0.353924	3.52679	11.5258	17	17	22.531	23.4742	17	17	17	17	17	24.0536	17
P63168	Dynein light chain 1, cytoplasmic	Dynll1	0.166386	1	2.82397	7.08111	0.392364	1	1.40021	2.6394	0.517487	1	-1.42377	0.372738	0.381014	0.913957	-3.6899	0.077487	0.318326	1	2.48968	5.61652	0.296671	0.388402	2.57667	5.96559	0.978704	1	0.0869897	1.06215	0.797114	0.941288	-1.05216	0.482244	0.398172	0.457643	2.72473	6.61035	23.5057	23.7759	24.0205	23.7595	17	23.6202	23.3357	23.7511	17	23.9405	24.0595
P09925	Surfeit locus protein 1	Surf1	0.148439	1	2.81661	7.04506	0.3206	1	1.52891	2.88567	0.532663	1	-1.2877	0.409602	0.339267	0.855176	-3.5774	0.0837715	0.367289	1	2.18815	4.55719	0.298858	0.395377	2.4269	5.37738	0.939353	1	0.238757	1.17998	0.713229	0.895596	-1.41414	0.375233	0.425862	0.471108	2.40201	5.2854	23.7256	23.8319	23.1053	23.4858	17	22.7441	17	23.5619	23.2967	23.3508	23.548
Q9D0L8	mRNA cap guanine-N7 methyltransferase	Rnmt	0.0901067	1	2.57874	5.97416	0.348115	1	1.67447	3.19202	0.346594	1	-0.904266	0.534304	NaN	1	0	1	0.373901	1	1.81945	3.52948	0.901206	0.914558	0.312344	1.24172	0.373901	1	-1.50711	0.351815	NaN	1	0	1	0.495025	0.580262	-1.50711	0.351815	21.8566	22.4584	17	17	17	17	17	17	17	17	17
P62500;E9Q7M2	TSC22 domain family protein 1;TSC22 domain family, member 2	Tsc22d1;Tsc22d2	0.172615	1	2.51294	5.70782	0.406134	1	1.22592	2.33904	0.516282	1	-1.28702	0.409796	0.383511	0.953246	-3.10629	0.116122	0.344967	1	2.1708	4.50274	0.369004	0.483144	2.09663	4.27708	0.980814	1	-0.0741755	0.949885	0.732962	0.90936	-1.25392	0.419308	0.554054	0.642901	1.7782	3.42997	22.5878	23.2939	23.0906	23.2921	17	22.6016	17	22.9917	23.1725	22.7486	23.0656
Q9D7M1	Glucose-induced degradation protein 8 homolog	Gid8	0.181769	1	2.4622	5.51058	0.347052	1	1.35418	2.55652	0.569983	1	-1.10802	0.463929	0.427968	1	2.9933	7.96296	0.0989278	1	4.16008	17.8776	0.397881	0.638919	0.317843	1.24647	0.117588	1	-3.84224	0.069722	0.196693	0.467738	4.10554	17.2144	0.316265	0.39628	-2.73	0.150726	22.86	22.5587	23.1809	23.5085	22.9999	23.0564	17	22.7678	17	17	23.0696
Q61234	Alpha-1-syntrophin	Snta1	0.12384	1	3.00027	8.00149	0.701211	1	0.781799	1.71927	0.23818	1	-2.21847	0.214869	0.0123179	0.852211	-5.56723	0.021091	0.114714	1	3.63945	12.4619	0.111687	0.3352	3.65348	12.5837	0.995859	1	0.0140349	1.00978	0.495025	0.823763	-1.80455	0.286271	0.207524	0.212009	3.77671	13.7058	17	22.1611	22.5921	22.5788	17	17	17	17	22.4136	23.1909	21.9436
Q8BSI6;E9Q816	R3H and coiled-coil domain-containing protein 1;Cytochrome P450 2W1	R3hcc1;Cyp2w1	0.0112833	1	9.21451	594.079	0.0112833	0.4464	9.21451	594.079	NaN	1	0	1	NaN	1	0	1	0.116135	1	8.34965	326.208	0.116135	0.284188	8.34965	326.208	NaN	1	0	1	NaN	1	0	1	NaN	1	0	1	28.8091	29.6098	29.4391	17	17	17	17	17	17	17	17
Q8CCP0	Nuclear export mediator factor Nemf	Nemf	0.167667	1	3.86294	14.5499	0.163182	1	3.88878	14.8129	0.993589	1	0.0258461	1.01808	0.990832	1	0.0829535	1.05918	0.347901	1	3.1802	9.06436	0.349894	0.424902	3.16798	8.98787	0.997833	1	-0.0122255	0.991562	0.802242	0.939112	-1.40754	0.376954	0.787823	0.869664	-1.50272	0.352888	26.632	26.3192	25.9551	26.1851	17	26.1308	25.6663	26.2525	17	25.9649	17
Q6P2K6;Q922R5	Serine/threonine-protein phosphatase 4 regulatory subunit 3A;Serine/threonine-protein phosphatase 4 regulatory subunit 3B	Ppp4r3a	0.181222	1	2.367	5.15867	0.171443	1	2.40055	5.28004	0.986836	1	0.033551	1.02353	0.453905	1	2.69209	6.46247	0.128339	1	3.79411	13.872	0.333171	0.422804	2.0553	4.15631	0.556266	1	-1.73881	0.299618	0.251796	0.641729	3.62244	12.3158	0.818634	0.89585	-0.80845	0.570995	22.8558	23.1472	22.5192	22.6387	22.8979	22.2954	17	22.9227	17	17	22.8092
A6X919	Probable C-mannosyltransferase DPY19L1	Dpy19l1	0.192536	1	2.9022	7.47567	0.254175	1	2.60693	6.09205	0.910926	1	-0.295274	0.814918	0.42265	1	2.81443	7.0344	0.4619	1	2.10638	4.30608	0.156743	0.567489	-0.262031	0.833913	0.411945	1	-2.36841	0.193659	0.593013	0.855487	-2.35191	0.195887	2.54934e-06	0.116667	-7.53474	0.00539283	23.693	24.4959	24.0219	24.3003	17	22.6289	24.4871	25.0119	17	17	17
A6PWD2	Forkhead-associated domain-containing protein 1	Fhad1	0.185888	1	2.49688	5.64463	0.205886	1	2.42768	5.38027	0.975039	1	-0.0692009	0.953166	0.388295	0.959812	-3.37391	0.0964612	0.377011	1	2.0216	4.06033	0.0982748	0.276111	4.15553	17.8213	0.489031	1	2.13394	4.38913	0.79553	0.941589	-0.986784	0.504601	0.168023	0.164959	4.52106	22.9601	23.4092	23.0212	23.3209	22.9188	23.1572	17	23.0792	23.117	17	23.6561	23.2489
Q3TLH4	Protein PRRC2C	Prrc2c	0.178181	1	2.48815	5.61057	0.203843	1	2.39111	5.24559	0.964122	1	-0.0970413	0.934948	0.433141	1	2.9308	7.62534	0.118891	1	3.97302	15.7036	0.419804	0.551052	1.85742	3.62358	0.500997	1	-2.1156	0.230749	0.223674	0.572247	3.94265	15.3764	0.771422	0.862056	-1.10376	0.465303	23.3358	22.5719	22.961	23.3683	23.1255	22.7479	17	22.9821	17	17	23.0117
P23780	Beta-galactosidase	Glb1	0.042077	1	0.804429	1.74645	0.467411	1	0.35634	1.28017	0.383469	1	-0.448089	0.733013	0.0901696	0.575129	0.771123	1.7066	0.0635279	1	1.01351	2.01881	0.588376	0.731269	-0.247391	0.842419	0.0860496	1	-1.2609	0.417284	0.274489	0.80917	0.683432	1.60596	0.0865742	0.147567	-1.34859	0.392676	24.5893	24.1497	24.543	24.3035	24.1936	23.8104	23.3713	23.9508	22.6336	23.0723	23.3894
P70295	Ancient ubiquitous protein 1	Aup1	0.236272	1	2.36643	5.15664	0.648484	1	0.0970082	1.06955	0.197772	1	-2.26942	0.207413	0.732851	1	0.220101	1.16482	0.152558	1	4.05015	16.566	0.631035	0.810856	0.121047	1.08752	0.162538	1	-3.9291	0.065648	0.264719	0.649568	4.07026	16.7984	0.840341	0.946587	-0.0789499	0.946746	23.1192	23.3657	23.589	23.0702	22.9402	23.7833	17	23.8745	17	22.7708	23.5124
D3Z3N4	Heterogeneous nuclear ribonucleoprotein H3	Hnrnph3	0.246313	1	2.01958	4.05465	0.604547	1	-0.110484	0.926277	0.170127	1	-2.13006	0.228448	0.858055	1	0.0203648	1.01422	0.121164	1	3.53993	11.6312	0.903625	0.95015	-0.0237484	0.983674	0.120356	1	-3.56368	0.0845718	0.178053	0.448402	4.07827	16.8921	0.111624	0.382013	0.49423	1.40857	22.7859	22.3383	22.4643	22.2238	22.7843	22.9766	17	22.4065	17	22.8311	22.889
Q8K2C7	Protein OS-9	Os9	0.513579	1	0.203448	1.15145	0.0933526	1	0.829955	1.77763	0.152329	1	0.626507	1.54382	0.866601	1	-0.127367	0.915501	0.886666	1	-0.0626081	0.957532	0.0434012	0.2888	1.06648	2.09432	0.0591389	1	1.12909	2.18721	0.468701	0.853868	-0.357826	0.78034	0.237321	0.397474	0.898631	1.8643	25.2439	24.7701	25.1624	24.3242	24.507	24.407	25.0907	25.2034	24.1505	23.9172	25.2516
Q91XC9	Peroxisomal membrane protein PEX16	Pex16	0.105116	1	0.218787	1.16375	0.0293813	1	0.423316	1.34101	0.12893	1	0.20453	1.15231	0.608075	1	0.0912762	1.06531	0.0607569	1	0.261936	1.19909	0.0430719	0.381779	0.541968	1.45596	0.215885	1	0.280032	1.21422	0.262486	0.863804	-0.146295	0.903568	0.875504	0.965987	0.0424608	1.02987	25.3757	25.8227	25.6568	25.8677	25.3297	25.4186	25.3823	25.6532	25.526	25.1381	25.4277
Q91ZH7	Phospholipase ABHD3	Abhd3	0.137475	1	0.188932	1.13992	0.0368639	1	0.402988	1.32224	0.183978	1	0.214056	1.15994	0.0963037	1	0.239717	1.18076	0.0520556	1	0.313902	1.24307	0.0833654	0.393276	0.51085	1.42489	0.372068	1	0.196948	1.14627	0.0190576	0.806508	0.30172	1.23261	0.379482	0.674575	0.258952	1.19661	25.1139	25.1859	24.9189	25.2881	25.0513	25.1863	24.8073	24.8772	24.7668	24.9227	24.8355
Q9CWZ3;A0A0N4SUH6	RNA-binding protein 8A	Rbm8a;Rbm8a2	0.184907	1	0.125529	1.09091	0.0757719	1	0.407777	1.32664	0.143935	1	0.282247	1.21609	0.579488	1	0.100641	1.07225	0.405297	1	0.113618	1.08194	0.111645	0.394119	0.516936	1.43091	0.194436	1	0.403318	1.32255	0.693111	0.966197	0.0554174	1.03916	0.356833	0.592716	0.358094	1.28173	25.8652	25.8821	25.684	25.6204	25.7258	25.6156	25.5783	25.7924	25.475	25.4267	25.7133
O35857	Mitochondrial import inner membrane translocase subunit TIM44	Timm44	0.0653561	1	0.100578	1.0722	0.176754	1	0.039362	1.02766	0.189852	1	-0.0612156	0.958456	0.0445923	1	-0.14626	0.90359	0.339776	1	0.0515448	1.03637	0.292428	0.859503	0.0470257	1.03313	0.933352	1	-0.00451914	0.996872	0.106984	0.856239	-0.124688	0.917202	0.719808	0.977341	0.0170527	1.01189	27.734	27.7091	27.7861	27.7171	27.5807	27.5416	27.7673	27.6504	27.6398	27.6821	27.7327
P56213	FAD-linked sulfhydryl oxidase ALR	Gfer	0.13159	1	0.094676	1.06783	0.00201605	1	0.257	1.19499	0.0129304	1	0.162324	1.11909	0.0784688	1	0.209268	1.1561	0.309408	1	0.0908546	1.065	0.0505942	0.563218	0.221883	1.16625	0.185305	1	0.131028	1.09507	0.750555	0.982916	0.0298134	1.02088	0.577483	0.934432	-0.0484263	0.966991	27.9201	27.9499	27.7631	27.8582	27.8561	27.736	27.7086	27.8792	27.7109	27.5699	27.6036
Q8VDN2	Sodium/potassium-transporting ATPase subunit alpha-1	Atp1a1	0.153502	1	0.0747173	1.05315	0.0262143	1	0.157853	1.11563	0.10471	1	0.0831356	1.05932	0.361141	1	0.0494823	1.03489	0.251359	1	0.0901502	1.06448	0.0771513	0.586352	0.195721	1.1453	0.238665	1	0.105571	1.07592	0.897955	0.99142	-0.00835768	0.994224	0.610566	0.93683	0.0477311	1.03364	30.8576	31.0376	30.8722	30.8882	30.8689	30.7994	30.8492	30.9115	30.7669	30.7609	30.8085
Q9Z0V7	Mitochondrial import inner membrane translocase subunit Tim17-B	Timm17b	0.0929569	1	-0.255042	0.837962	0.166302	1	0.166537	1.12236	0.00719116	1	0.42158	1.33939	0.210773	0.891058	0.583109	1.49807	0.024239	1	-0.298587	0.813049	0.874384	0.95811	0.0153071	1.01067	0.000697223	1	0.313894	1.24306	0.869153	0.984422	0.0401093	1.02819	0.0941305	0.506259	-0.229106	0.853163	24.4948	24.4044	24.1115	24.2536	24.8954	24.295	24.5527	24.5569	24.5557	23.8988	24.1253
Q8R0Y6	Cytosolic 10-formyltetrahydrofolate dehydrogenase	Aldh1l1	0.0607885	1	-0.275995	0.82588	0.15487	1	-0.0979877	0.934335	0.176384	1	0.178008	1.13132	0.13253	0.88384	0.419279	1.33726	0.132016	1	-0.134087	0.911247	0.0457843	0.686419	-0.116927	0.92215	0.842555	1	0.0171598	1.01197	0.0350971	0.636043	0.39896	1.31856	0.981134	0.997337	-0.00315921	0.997813	34.8305	34.7686	34.7685	34.7424	35.373	35.2127	34.9968	34.9259	34.759	34.7236	35.0235
Q8K297	Procollagen galactosyltransferase 1	Colgalt1	0.0011447	1	-0.340833	0.789585	0.000710849	1	-0.458537	0.727724	0.198356	1	-0.117704	0.921653	0.735582	1	-0.082305	0.944547	0.00277257	1	-0.332605	0.794101	0.00191953	0.350296	-0.473909	0.720011	0.137223	1	-0.141304	0.906699	0.721098	0.973474	-0.0464373	0.968325	0.516608	0.85745	-0.105436	0.929524	24.329	24.4003	24.4301	24.4781	24.8605	24.5842	24.8531	24.6981	24.7552	24.9658	24.6435
P50518	V-type proton ATPase subunit E 1	Atp6v1e1	0.0372728	1	-0.553446	0.681391	0.144826	1	-0.379529	0.768688	0.125837	1	0.173917	1.12812	0.605447	1	0.169162	1.12441	0.00478319	1	-0.747845	0.595493	0.0120496	0.378724	-0.570758	0.673263	0.0937505	1	0.177087	1.1306	0.578372	0.953306	0.0686172	1.04871	0.733083	0.919528	0.0765419	1.05449	25.4321	24.3756	24.486	24.7727	25.4694	25.2531	25.3676	25.3328	25.1774	24.9354	25.4488
A2BDX3	Adenylyltransferase and sulfurtransferase MOCS3	Mocs3	0.0185523	1	-0.651113	0.636789	0.0668319	1	-0.32485	0.798381	0.116674	1	0.326263	1.25376	0.751922	1	0.0641546	1.04547	0.102955	1	-0.662743	0.631676	0.409629	0.716966	-0.161742	0.893945	0.160534	1	0.501001	1.4152	0.639926	0.918486	-0.18945	0.87694	0.21787	0.586098	0.247397	1.18706	24.2299	24.3202	24.7862	24.3529	25.064	24.8555	25.0772	25.6601	24.7103	24.7524	25.0388
Q9QZ06	Toll-interacting protein	Tollip	0.435512	1	0.177624	1.13102	0.140507	1	-0.26759	0.830706	0.0785656	1	-0.445214	0.734475	0.0103529	0.54703	-0.524974	0.694972	0.96771	1	-0.00662041	0.995422	0.000853543	0.384712	-0.398661	0.758562	0.0650032	1	-0.392041	0.762051	0.0457903	0.445126	-0.649043	0.637703	0.00261125	0.136211	-0.51611	0.699255	23.9362	24.2362	24.191	24.2857	23.6278	23.5627	24.5332	24.1774	24.0222	24.0773	24.1631
O54833	Casein kinase II subunit alpha	Csnk2a2	0.445429	1	0.172489	1.127	0.0447926	1	0.542348	1.45634	0.191654	1	0.369859	1.29223	0.819243	1	0.0485725	1.03424	0.607149	1	0.183406	1.13556	0.0487129	0.379399	0.767456	1.70227	0.234997	1	0.58405	1.49905	0.796347	0.962812	-0.117516	0.921773	0.340989	0.549627	0.417962	1.33604	22.8432	23.1637	23.1137	22.9474	22.7516	22.7964	23.2871	23.1352	22.2522	22.5399	22.911
Q9BCZ4	Selenoprotein S	Selenos	0.39492	1	0.138525	1.10078	0.0133935	1	0.603396	1.51929	0.00792955	1	0.46487	1.38019	0.131136	0.770222	0.584128	1.49913	0.623376	1	0.12952	1.09393	0.0961674	0.388512	0.514886	1.42888	0.0781839	1	0.385365	1.30619	0.765486	0.973434	-0.0519718	0.964617	0.344242	0.661514	-0.250735	0.840468	24.4208	24.1201	24.849	24.4346	24.3172	24.2557	24.2195	24.5824	24.2133	23.469	23.9356
Q8R409	Protein HEXIM1	Hexim1	0.453855	1	0.126887	1.09193	0.00291717	1	0.351081	1.27552	0.12516	1	0.224194	1.16812	0.0600928	0.775643	0.417494	1.33561	0.24325	1	0.243352	1.18374	0.0290897	0.394747	0.33868	1.2646	0.560115	1	0.0953274	1.06831	0.147731	0.806975	0.386689	1.30739	0.395292	0.891571	0.0645227	1.04574	23.8464	23.8845	23.6411	23.5552	23.9124	23.7614	23.156	23.6275	23.5672	23.3433	23.4956
O70404	Vesicle-associated membrane protein 8	Vamp8	0.26495	1	0.114468	1.08258	0.0442115	1	0.250107	1.18929	0.140585	1	0.135638	1.09858	0.379398	1	0.144279	1.10518	0.459477	1	0.104637	1.07522	0.135335	0.577894	0.234515	1.17651	0.337152	1	0.129878	1.0942	0.457715	0.926239	0.0960604	1.06885	0.605388	0.895306	0.0816587	1.05823	26.4616	26.4565	26.1957	26.1535	26.2878	26.2322	26.0665	26.3355	26.0899	25.9899	26.2416
Q8VCI5	Peroxisomal biogenesis factor 19	Pex19	0.20239	1	0.0874825	1.06251	0.0175026	1	0.222093	1.16642	0.0134878	1	0.13461	1.0978	0.273207	1	0.171262	1.12604	0.0183466	1	0.168271	1.12371	0.00279713	0.390952	0.278447	1.21289	0.0325381	1	0.110176	1.07936	0.279874	0.958598	0.0499274	1.03521	0.907437	0.989844	-0.0111583	0.992295	26.3533	26.5399	26.6623	26.5875	26.504	26.4525	26.3883	26.4213	26.4753	26.1955	26.4185
Q9D1N9	39S ribosomal protein L21, mitochondrial	Mrpl21	0.72724	1	0.0861915	1.06156	0.0812529	1	-0.273444	0.827342	0.162536	1	-0.359636	0.779361	0.052037	0.612786	-0.526083	0.694438	0.424122	1	-0.195763	0.873111	0.00609976	0.376895	-0.444434	0.734872	0.30556	1	-0.248671	0.841671	0.0818283	0.486641	-0.696419	0.617102	0.0266365	0.296732	-0.419008	0.747939	23.9047	23.7551	23.9138	24.0046	23.4326	23.3484	24.4977	23.9354	23.8277	23.799	24.0342
Q8R1T4	UDP-N-acetylglucosamine transporter	Slc35a3	0.586883	1	0.0854866	1.06105	7.74691e-05	1	0.315583	1.24451	0.12509	1	0.230096	1.17291	0.418969	1	0.262676	1.1997	0.710717	1	0.0743345	1.05288	0.00559498	0.394	0.282711	1.21648	0.341294	1	0.208377	1.15539	0.937549	0.986363	0.026282	1.01838	0.699986	0.962481	-0.0280177	0.980767	25.6989	25.6311	25.6125	25.5929	25.3041	25.8242	25.6895	25.7568	25.1673	25.3099	25.293
Q8CGF7	Transcription elongation regulator 1	Tcerg1	0.748837	1	0.0779992	1.05555	0.0827826	1	0.377163	1.29879	0.161244	1	0.299164	1.23043	0.466248	1	0.346395	1.27138	0.750744	1	0.0877616	1.06272	0.252289	0.565046	0.355438	1.27937	0.331769	1	0.267676	1.20387	0.557572	0.879037	0.236375	1.17803	0.541433	0.807988	0.157656	1.11547	23.2894	22.5742	23.2455	23.031	22.7111	23.4866	23.1917	22.6713	22.7245	22.7377	22.7672
P59242	Cingulin	Cgn	0.504545	1	0.075409	1.05366	0.0124416	1	0.26433	1.20108	0.111723	1	0.188921	1.13991	0.235576	1	0.249534	1.18882	0.172453	1	0.153937	1.1126	0.0266037	0.403646	0.302449	1.23324	0.221855	1	0.148512	1.10843	0.15127	0.815599	0.264342	1.20109	0.215022	0.700969	0.16332	1.11986	27.6616	27.6299	27.5798	27.4486	27.532	27.7943	27.2493	27.4566	27.4906	27.3433	27.4839
Q64735	Complement component receptor 1-like protein	Cr1l	0.659157	1	0.0732791	1.05211	0.091022	1	0.36983	1.2922	0.181015	1	0.296551	1.2282	0.595604	1	0.241616	1.18232	0.554037	1	0.153514	1.11228	0.0518244	0.385925	0.486689	1.40122	0.311705	1	0.333174	1.25978	0.901163	0.982237	0.0407031	1.02862	0.73835	0.89631	0.132261	1.09601	23.1915	23.3708	23.5442	23.427	23.3737	23.2953	23.0282	23.757	23.0961	23.4773	22.7085
Q62417	Sorbin and SH3 domain-containing protein 1	Sorbs1	0.249229	1	0.0720236	1.05119	0.0367026	1	0.243448	1.18382	0.0726834	1	0.171424	1.12617	0.785989	1	0.0713701	1.05071	0.5222	1	0.0450249	1.0317	0.0114742	0.394093	0.283152	1.21685	0.00462873	1	0.238127	1.17946	0.0498235	0.856143	-0.126614	0.915979	0.833757	0.960979	0.0401424	1.02822	26.1058	26.2152	26.0951	26.2908	26.015	26.0424	26.1191	26.1326	26.2143	26.1873	25.7274
P20060	Beta-hexosaminidase subunit beta	Hexb	0.799512	1	0.0679372	1.04822	0.165808	1	-0.302768	0.810695	0.141347	1	-0.370705	0.773404	0.811999	1	0.0924559	1.06618	0.18316	1	0.265254	1.20185	0.104932	0.410476	-0.414225	0.750422	0.0053937	0.985111	-0.67948	0.62439	0.00307863	0.331429	0.767318	1.7021	0.988207	0.996686	-0.00461737	0.996805	25.2479	24.4975	25.0268	24.9042	25.2181	25.405	24.4793	24.6185	24.535	24.8906	25.5476
P62342	Thioredoxin reductase-like selenoprotein T	Selenot	0.703851	1	0.059288	1.04195	0.076832	1	0.311865	1.24131	0.13818	1	0.252577	1.19133	0.842069	1	0.0281601	1.01971	0.866131	1	-0.0349394	0.976073	0.189099	0.548211	0.367249	1.28989	0.162027	1	0.402188	1.32151	0.232749	0.822332	-0.28779	0.819156	0.754422	0.918515	0.0862376	1.0616	24.7296	25.0835	24.6889	24.6671	24.4679	24.6528	24.7533	25.1231	24.668	24.4488	24.6155
O08966	Solute carrier family 22 member 1	Slc22a1	0.744711	1	0.0546231	1.03859	0.164733	1	-0.217831	0.859857	0.156995	1	-0.272454	0.82791	0.55864	1	-0.229292	0.853053	0.884448	1	0.0393365	1.02764	0.0892792	0.548831	-0.261892	0.833993	0.29103	1	-0.301229	0.811561	0.871442	0.981502	-0.054876	0.962677	0.654545	0.874129	-0.126813	0.915852	25.582	25.7583	25.4416	25.6263	25.4339	25.5951	25.8181	25.7941	25.0958	25.4242	26.0634
Q9QZX7	Serine racemase	Srr	0.631187	1	0.0540244	1.03816	0.128776	1	0.256365	1.19447	0.141395	1	0.202341	1.15056	0.426627	1	0.308989	1.23884	0.358117	1	0.1354	1.0984	0.150459	0.564571	0.266642	1.203	0.349939	1	0.131243	1.09524	0.659749	0.961772	0.0660454	1.04684	0.682767	0.886836	-0.1117	0.925497	26.0486	26.4674	26.0878	26.2501	26.3344	26.0638	26.0089	26.138	26.2523	25.6088	26.1715
Q80X90	Filamin-B	Flnb	0.312153	1	0.0536599	1.03789	0.0294513	1	0.124815	1.09037	0.0814026	1	0.0711555	1.05056	0.192477	1	0.105745	1.07605	0.241039	1	0.0847975	1.06054	0.0332756	0.660597	0.132893	1.09649	0.387415	1	0.0480957	1.0339	0.943129	0.994438	-0.00505129	0.996505	0.20518	0.884345	-0.0627009	0.95747	30.1314	30.3289	30.1934	30.2696	30.2035	30.1448	30.1903	30.2555	30.0918	30.0223	30.1145
Q8K0D5	Elongation factor G, mitochondrial	Gfm1	0.461349	1	0.0511918	1.03612	0.127297	1	-0.0938907	0.936992	0.0485959	1	-0.145082	0.904328	0.0797556	1	-0.134988	0.910678	0.643109	1	0.045098	1.03175	0.195227	0.73243	-0.106714	0.928701	0.223512	1	-0.151812	0.900119	0.599761	0.95838	0.0650438	1.04612	0.606986	0.935113	0.0482194	1.03399	27.1122	26.9252	27.0105	27.0154	26.9821	27.0253	27.0702	26.7789	26.9668	27.173	27.1043
P70398	Probable ubiquitin carboxyl-terminal hydrolase FAF-X	Usp9x	0.462494	1	0.048402	1.03412	0.0497267	1	0.1487	1.10857	0.100752	1	0.100298	1.07199	0.935443	1	-0.00852585	0.994108	0.250708	1	0.0696373	1.04945	0.00189469	0.410471	0.242484	1.18303	0.0420525	1	0.172847	1.12728	0.423159	0.939438	-0.0729208	0.950711	0.198283	0.781152	0.108452	1.07807	26.9985	27.2242	27.1988	27.1774	26.9971	27.118	27.0844	27.2306	27.0765	26.9952	27.137
P39054	Dynamin-2	Dnm2	0.507202	1	0.0463206	1.03263	0.193086	1	-0.0833699	0.94385	0.10413	1	-0.129691	0.914027	0.586374	1	-0.0647373	0.956119	0.772177	1	0.0276559	1.01935	0.0671521	0.651466	-0.145337	0.904168	0.124623	1	-0.172993	0.887001	0.725279	0.974137	-0.0478757	0.96736	0.0784338	0.653054	-0.156131	0.897428	27.1893	27.2366	27.2282	27.109	27.0215	27.21	27.2728	27.2084	27.0097	27.216	27.1449
Q9R0H0	Peroxisomal acyl-coenzyme A oxidase 1	Acox1	0.440444	1	0.0444567	1.03129	0.111616	1	0.295011	1.22689	0.110896	1	0.250554	1.18966	0.359748	1	0.394508	1.31449	0.447748	1	0.0567843	1.04014	0.119026	0.588468	0.211369	1.15779	0.196107	1	0.154584	1.1131	0.391154	0.956976	-0.0540905	0.963201	0.364095	0.644292	-0.294015	0.815629	33.5591	33.6146	33.6704	33.7999	33.6092	33.559	33.5854	33.7151	33.614	32.8558	33.5233
Q9R0A0	Peroxisomal membrane protein PEX14	Pex14	0.561339	1	0.0412382	1.029	0.124072	1	0.156888	1.11488	0.189269	1	0.11565	1.08346	0.254848	1	0.0719786	1.05116	0.971991	1	0.00296593	1.00206	0.266662	0.698911	0.14773	1.10782	0.348458	1	0.144764	1.10555	0.777955	0.98301	0.0311349	1.02182	0.533816	0.862695	0.10392	1.07469	26.2756	26.0828	26.1015	26.0339	26.1264	26.0753	25.9186	26.1689	26.1218	26.0666	25.9912
Q8K0L9	Zinc finger and BTB domain-containing protein 20	Zbtb20	0.756292	1	0.0412098	1.02898	0.00452718	1	0.320983	1.24918	0.035441	1	0.279773	1.214	0.246802	1	0.373571	1.29556	0.828933	1	0.0367317	1.02579	0.0688473	0.547926	0.253972	1.19249	0.193461	1	0.217241	1.16251	0.936241	0.988135	0.0205495	1.01435	0.174911	0.727803	-0.135781	0.910177	24.542	24.3529	24.4578	24.6629	24.6974	24.2526	24.6018	24.5678	24.1938	24.04	24.1628
Q8BIW1	Exopolyphosphatase PRUNE1	Prune1	0.844059	1	0.0386287	1.02714	0.117853	1	-0.585002	0.666648	0.0376089	1	-0.623631	0.649035	0.29503	1	-0.594091	0.662462	0.88347	1	0.0468044	1.03297	0.26787	0.522023	-0.596519	0.661348	0.168207	1	-0.643324	0.640236	0.67684	0.964015	-0.0614777	0.958282	0.858574	0.946963	-0.11071	0.926132	23.0948	22.6724	23.4134	23.5917	23.1354	23.0997	23.1313	23.0293	23.3765	24.1339	23.2894
Q8K2Q9	Shootin-1	Shtn1	0.825013	1	0.0350396	1.02458	0.0287055	1	0.326624	1.25408	0.0801102	1	0.291584	1.22398	0.632869	1	0.184677	1.13656	0.420651	1	-0.116924	0.922152	0.150046	0.575146	0.245932	1.18586	0.066796	1	0.362856	1.28597	0.383138	0.85375	-0.246283	0.843066	0.748468	0.934634	-0.0681041	0.953891	25.0946	24.9292	25.001	24.7122	24.4745	25.0283	24.8631	24.9432	25.1868	24.3857	24.7478
Q9D8S9	BolA-like protein 1	Bola1	0.516527	1	0.0345516	1.02424	0.0307567	1	0.134862	1.09799	0.116715	1	0.100311	1.072	0.73872	1	0.0426483	1.03	0.541876	1	0.0436255	1.0307	0.0202052	0.572675	0.182377	1.13475	0.109044	1	0.138752	1.10095	0.943611	0.991518	0.00734647	1.00511	0.251984	0.798299	0.10345	1.07434	26.0615	26.028	26.0897	26.1405	26.1321	25.9675	25.9606	26.1517	26.015	25.932	26.0823
Q99KG5	Lipolysis-stimulated lipoprotein receptor	Lsr	0.846498	1	0.0302461	1.02119	0.187852	1	0.224416	1.1683	0.147844	1	0.19417	1.14407	0.408898	1	0.202885	1.151	0.890719	1	-0.0214564	0.985238	0.208134	0.669276	0.166904	1.12265	0.292401	1	0.18836	1.13947	0.358527	0.856928	0.18049	1.13327	0.432895	0.772391	0.165966	1.12192	27.0253	26.6592	26.5094	26.4205	26.718	26.7452	26.4771	26.8022	26.3741	26.3335	26.724
P62814	V-type proton ATPase subunit B, brain isoform	Atp6v1b2	0.850092	1	0.0261062	1.01826	0.101926	1	-0.13138	0.912958	0.177879	1	-0.157486	0.896586	0.706333	1	-0.0186119	0.987182	0.636414	1	0.0706558	1.05019	0.0190552	0.574806	-0.179413	0.883062	0.153858	1	-0.250069	0.840856	0.207638	0.824706	0.286379	1.21958	0.376865	0.906815	0.0549218	1.0388	26.6951	26.4428	26.4339	26.3687	26.6733	26.5884	26.4947	26.4664	26.0722	26.6439	26.655
Q9DBS5	Kinesin light chain 4	Klc4	0.676355	1	0.0243875	1.01705	0.00320097	1	-0.324717	0.798455	0.000760867	1	-0.349104	0.785071	0.144279	1	-0.309752	0.806781	0.877635	1	-0.0116736	0.991941	0.00880652	0.377986	-0.387013	0.764711	0.0120129	1	-0.37534	0.770924	0.852917	0.984323	-0.016976	0.988302	0.548481	0.885809	-0.082564	0.944378	24.8273	24.6213	24.734	24.7753	24.6425	24.7673	24.7567	24.7934	24.6154	25.1314	24.8978
Q9CQW2;Q8VEH3	ADP-ribosylation factor-like protein 8B;ADP-ribosylation factor-like protein 8A	Arl8b;Arl8a	0.793207	1	0.0228006	1.01593	0.0873055	1	0.14488	1.10564	0.142754	1	0.12208	1.0883	0.278988	1	0.120825	1.08736	0.434723	1	-0.0813675	0.945161	0.562231	0.891514	0.041549	1.02922	0.210475	1	0.122917	1.08893	0.232302	0.855565	-0.157197	0.896766	0.0914795	0.663461	-0.155105	0.898067	26.792	26.7317	26.6099	26.539	26.6063	26.4958	26.5946	26.68	26.8501	26.3694	26.491
Q9EQQ2	Protein YIPF5	Yipf5	0.920774	1	0.011766	1.00819	0.0854383	1	0.286617	1.21978	0.108741	1	0.274851	1.20987	0.528181	1	0.253074	1.19174	0.522691	1	-0.10283	0.931204	0.137175	0.624053	0.186539	1.13803	0.171047	1	0.289369	1.22211	0.438496	0.876836	-0.174058	0.886346	0.647986	0.866403	-0.137763	0.908927	24.9712	24.8467	24.7597	24.7675	24.7987	24.6415	24.9461	25.1141	24.6223	24.142	24.792
P55096	ATP-binding cassette sub-family D member 3	Abcd3	0.90546	1	0.0107165	1.00746	0.153573	1	0.18758	1.13885	0.0720542	1	0.176863	1.13042	0.290021	1	0.243529	1.18389	0.18228	1	0.0828762	1.05913	0.109351	0.58418	0.215295	1.16094	0.266473	1	0.132419	1.09613	0.752483	0.984043	-0.028204	0.98064	0.459558	0.797996	-0.139314	0.907951	31.1478	31.5593	31.4542	31.4311	31.277	31.4639	31.3451	31.4588	31.392	30.9839	31.2699
Q3TIX6	Far upstream element (FUSE)-binding protein 3	Fubp3	0.967538	1	0.00690851	1.0048	0.0708733	1	0.211337	1.15776	0.193433	1	0.204429	1.15223	0.691219	1	0.0214891	1.01501	0.710077	1	-0.098224	0.934182	0.167231	0.591746	0.228165	1.17134	0.250267	1	0.326389	1.25387	0.6129	0.918604	-0.16432	0.892349	0.32502	0.768388	0.140579	1.10235	24.7491	24.7548	24.4112	24.6086	24.4848	24.566	25.1152	24.6038	24.3503	24.4807	24.5272
Q9CY27	Very-long-chain enoyl-CoA reductase	Tecr	0.970022	1	0.0035141	1.00244	0.0750945	1	0.166495	1.12233	0.140282	1	0.162981	1.1196	0.343116	1	0.109427	1.0788	0.869998	1	0.0218856	1.01529	0.0533919	0.565134	0.220569	1.16519	0.235538	1	0.198683	1.14765	0.561094	0.934498	0.108081	1.07779	0.152344	0.617675	0.197337	1.14658	29.4415	29.4033	29.2946	29.3283	29.3549	29.5016	29.3249	29.5278	29.1078	29.2688	29.3689
Q9WV55	Vesicle-associated membrane protein-associated protein A	Vapa	0.979486	1	0.00259066	1.0018	0.166462	1	0.145481	1.1061	0.136451	1	0.14289	1.10411	0.567547	1	0.0933971	1.06688	0.88671	1	-0.0215537	0.985171	0.186318	0.672017	0.154332	1.11291	0.218676	1	0.175886	1.12966	0.756984	0.973563	0.0492764	1.03475	0.341677	0.780305	0.131765	1.09563	29.4895	29.4871	29.2216	29.2336	29.3797	29.3902	29.2109	29.5603	29.2358	29.1539	29.4291
Q9JKL4	NADH dehydrogenase [ubiquinone] 1 alpha subcomplex assembly factor 3	Ndufaf3	0.997331	0.999466	0.000170708	1.00012	0.146833	1	0.141625	1.10315	0.0697334	1	0.141454	1.10302	0.0610437	1	0.192473	1.14272	0.894501	1	0.0105247	1.00732	0.402828	0.74928	0.117966	1.0852	0.385216	1	0.107442	1.07732	0.661398	0.982153	-0.0189352	0.986961	0.516787	0.858254	-0.103967	0.930471	23.7923	23.822	23.9975	23.7726	23.8268	23.8424	23.8303	23.913	23.8173	23.5929	23.6914
Q8BWF0	Succinate-semialdehyde dehydrogenase, mitochondrial	Aldh5a1	0.992223	1	-0.000656986	0.999545	0.158025	1	0.152711	1.11166	0.144392	1	0.153368	1.11216	0.388351	1	0.280257	1.21441	0.844446	1	0.00751432	1.00522	0.239095	0.796728	0.0762895	1.0543	0.314847	1	0.0687752	1.04883	0.381748	0.913762	0.103955	1.07472	0.590959	0.869143	-0.107527	0.928177	29.7743	29.6699	29.648	29.6041	29.863	29.6112	29.5779	29.6821	29.6395	29.2336	29.6801
Q8BU88	39S ribosomal protein L22, mitochondrial	Mrpl22	0.97371	1	-0.00378885	0.997377	0.146763	1	-0.190154	0.876512	0.178217	1	-0.186365	0.878817	0.499554	1	-0.159019	0.895634	0.747186	1	-0.0503254	0.965718	0.147169	0.568318	-0.254921	0.838033	0.290149	1	-0.204596	0.867782	0.471725	0.888942	-0.151236	0.900479	0.364857	0.720448	-0.196812	0.872476	24.8528	24.7626	25.0432	24.92	24.6767	24.9387	24.9446	24.7569	25.1752	25.1105	24.8229
P62077	Mitochondrial import inner membrane translocase subunit Tim8 B	Timm8b	0.888311	1	-0.00494061	0.996581	0.0574242	1	0.178078	1.13138	0.0343765	1	0.183018	1.13526	0.85526	1	0.0152349	1.01062	0.813741	1	-0.0129967	0.991032	0.00353161	0.38942	0.281877	1.21578	0.00644866	1	0.294874	1.22678	0.576879	0.973724	-0.0349722	0.976051	0.0426815	0.461674	0.244666	1.18482	26.5419	26.6105	26.5142	26.5721	26.5425	26.5447	26.5502	26.6638	26.5217	26.4547	26.602
Q7TMB8	Cytoplasmic FMR1-interacting protein 1	Cyfip1	0.909225	1	-0.0102524	0.992919	0.0889507	1	0.119713	1.08652	0.196835	1	0.129965	1.09427	0.46144	1	0.162889	1.11953	0.960688	1	0.00550524	1.00382	0.242305	0.732371	0.113521	1.08187	0.457195	1	0.108016	1.07774	0.858731	0.983522	0.0344381	1.02416	0.878995	0.979109	-0.0204357	0.985935	25.4139	25.4112	25.456	25.3982	25.6079	25.2935	25.6185	25.3533	25.277	25.1998	25.3759
P42208	Septin-2	Septin2	0.912204	1	-0.0139085	0.990406	0.0533025	1	-0.173401	0.88675	0.194013	1	-0.159493	0.89534	0.949155	1	-0.00640011	0.995574	0.899433	1	0.0217285	1.01518	0.0799684	0.563604	-0.239826	0.846847	0.21608	1	-0.261555	0.834188	0.443308	0.873953	0.184255	1.13623	0.585489	0.906272	-0.0708993	0.952044	27.5385	27.4387	27.2876	27.4325	27.4599	27.6377	27.6661	27.2653	27.1622	27.5558	27.5546
Q9CYI4	Putative RNA-binding protein Luc7-like 1	Luc7l	0.922279	1	-0.0154972	0.989316	0.0843992	1	0.318427	1.24697	0.110664	1	0.333924	1.26044	0.444556	1	0.266129	1.20258	0.605383	1	0.0841637	1.06007	0.0429951	0.386089	0.463285	1.37868	0.125789	1	0.379122	1.30055	0.32838	0.851181	0.294398	1.22637	0.148954	0.432107	0.407391	1.32629	23.2237	23.0363	23.1479	23.2697	23.6083	23.1148	23.2044	23.1985	22.7985	22.9594	23.2314
Q61599	Rho GDP-dissociation inhibitor 2	Arhgdib	0.916782	1	-0.0228103	0.984313	0.143411	1	-0.287308	0.81943	0.169573	1	-0.264498	0.832488	0.821618	1	-0.0359726	0.975374	0.943372	1	0.0127252	1.00886	0.0834154	0.393737	-0.404123	0.755696	0.145548	1	-0.416848	0.749059	0.125894	0.825706	0.454375	1.37019	0.771189	0.935944	0.0735	1.05227	26.1777	25.5447	25.5321	25.7018	25.9465	26.1226	25.8852	25.3484	25.5068	26.1797	25.9612
P49698	Hepatocyte nuclear factor 4-alpha	Hnf4a	0.830507	1	-0.0251251	0.982735	0.187187	1	0.306538	1.23674	0.116146	1	0.331663	1.25846	0.189279	1	0.189292	1.1402	0.670696	1	0.0458616	1.0323	0.102516	0.390636	0.472438	1.38745	0.100776	1	0.426577	1.34404	0.00538492	0.758404	0.296991	1.22858	0.138036	0.389269	0.534275	1.44821	24.185	24.1499	24.0229	23.8083	24.1925	24.2972	23.9449	23.9331	23.9655	23.9743	24.1368
Q8VCF0	Mitochondrial antiviral-signaling protein	Mavs	0.753931	1	-0.0282022	0.980642	0.0995014	1	-0.204171	0.868037	0.0734118	1	-0.175969	0.885173	0.566188	1	-0.125703	0.916557	0.581038	1	-0.0741119	0.949927	0.0885811	0.534703	-0.283591	0.821544	0.085357	1	-0.209479	0.864849	0.625134	0.964111	-0.0553865	0.962337	0.423405	0.788609	-0.139163	0.908046	27.2864	26.9781	27.2872	27.3088	27.1255	27.2947	27.3654	27.1513	27.2798	27.4999	27.1717
Q9WV68	Peroxisomal 2,4-dienoyl-CoA reductase	Decr2	0.807157	1	-0.030843	0.978848	0.173086	1	0.173294	1.12763	0.160275	1	0.204137	1.152	0.313036	1	0.329641	1.2567	0.384634	1	0.0630913	1.0447	0.040364	0.584106	0.183559	1.13568	0.173552	1	0.120468	1.08709	0.0200622	0.637394	0.369342	1.29176	0.460522	0.779308	0.160168	1.11742	30.1722	29.905	30.0271	29.939	30.2054	30.3212	29.8567	29.8257	29.9994	29.694	30.1733
Q91YH5	Atlastin-3	Atl3	0.689106	1	-0.0350389	0.976005	0.11285	1	0.102608	1.07371	0.123345	1	0.137647	1.10011	0.19748	1	0.147039	1.10729	0.98307	1	0.00284831	1.00198	0.177253	0.690108	0.134234	1.09751	0.379598	1	0.131386	1.09535	0.684095	0.962101	0.0701246	1.04981	0.594877	0.922428	0.054471	1.03848	28.0817	28.2184	28.089	28.0557	28.1282	28.2483	28.2147	28.2526	27.8872	27.9926	28.0899
Q80WQ2	Protein VAC14 homolog	Vac14	0.899178	1	-0.036164	0.975245	0.0989122	1	0.397504	1.31723	0.0959875	1	0.433668	1.35066	0.565316	1	0.218609	1.16361	0.954678	1	-0.0260188	0.982127	0.0927148	0.392933	0.551022	1.46512	0.181694	1	0.57704	1.49179	0.81245	0.963435	-0.119065	0.920784	0.394882	0.698514	0.239367	1.18047	23.4289	24.0244	23.7618	23.1938	23.4924	23.6415	24.357	23.157	23.5442	23.0369	23.6598
Q9CR70	EKC/KEOPS complex subunit Lage3	Lage3	0.772731	1	-0.0373625	0.974435	0.0161838	1	0.191454	1.14191	0.0969907	1	0.228816	1.17187	0.190175	1	0.240481	1.18139	0.788711	1	0.0485579	1.03423	0.00295632	0.391493	0.269597	1.20547	0.273288	1	0.221039	1.16557	0.458823	0.86879	0.196587	1.14598	0.0919077	0.617135	0.177145	1.13064	23.9125	23.9372	23.931	23.9567	24.1936	23.9858	23.5585	24.1053	24.0155	23.9154	23.783
Q9D7A8	Armadillo repeat-containing protein 1	Armc1	0.846445	1	-0.0375742	0.974292	0.160385	1	-0.427908	0.743339	0.199328	1	-0.390334	0.762953	0.938838	1	0.0149918	1.01045	0.743442	1	-0.0998891	0.933105	0.00905981	0.259059	-0.76044	0.590316	0.0859052	1	-0.66055	0.632637	0.586425	0.895195	-0.207682	0.865927	0.0223553	0.135917	-0.883224	0.542154	25.2494	25.1656	25.5263	25.3054	25.211	25.2382	25.9593	25.1253	25.2123	25.0372	25.3821
O55242	Sigma non-opioid intracellular receptor 1	Sigmar1	0.775715	1	-0.0399343	0.972699	0.058134	1	0.226582	1.17006	0.0690118	1	0.266516	1.2029	0.0261639	0.619469	0.441384	1.35791	0.905745	1	-0.0270659	0.981414	0.340199	0.734236	0.122871	1.0889	0.493796	1	0.149937	1.10952	0.855438	0.980485	0.0492252	1.03471	0.0690636	0.474088	-0.242222	0.845442	26.0781	26.2303	25.8926	26.0296	26.1654	26.0888	26.1333	26.3774	25.723	25.7477	25.6238
Q99JR5	Tubulointerstitial nephritis antigen-like	Tinagl1	0.743383	1	-0.041796	0.971445	0.133102	1	0.205938	1.15344	0.109718	1	0.247734	1.18734	0.0963777	1	0.24583	1.18577	0.584887	1	0.0682615	1.04845	0.0485501	0.42356	0.317265	1.24597	0.109076	1	0.249003	1.18839	0.0713974	0.818989	0.338494	1.26444	0.0576672	0.399213	0.341668	1.26722	26.5349	26.5568	26.4469	26.2969	26.6345	26.773	26.2198	26.3555	26.5206	26.5026	26.4133
P84078;P61205;Q8BSL7	ADP-ribosylation factor 1;ADP-ribosylation factor 3;ADP-ribosylation factor 2	Arf1;Arf3	0.758322	1	-0.0418073	0.971437	0.118553	1	0.160726	1.11785	0.150083	1	0.202533	1.15072	0.366892	1	0.114561	1.08265	0.851105	1	-0.0419223	0.97136	0.143545	0.589836	0.219259	1.16414	0.294965	1	0.261181	1.19846	0.963891	0.991938	-0.012448	0.991409	0.409924	0.791134	0.134172	1.09746	29.4152	29.5751	29.4123	29.3167	29.4331	29.4952	29.2489	29.8655	29.3155	29.2556	29.4437
Q8K1J6	CCA tRNA nucleotidyltransferase 1, mitochondrial	Trnt1	0.878569	1	-0.0427977	0.970771	0.109034	1	-0.432969	0.740736	0.141785	1	-0.390172	0.763039	0.436949	1	-0.346259	0.786621	0.794903	1	0.0898717	1.06428	0.171177	0.549082	-0.329575	0.795771	0.319862	1	-0.419447	0.747711	0.788999	0.961243	-0.127863	0.915186	0.584441	0.797588	-0.201051	0.869917	23.4478	24.2898	24.0828	24.1767	24.1677	23.763	24.5159	24.2932	23.4706	24.0146	24.6086
Q8BJZ4	28S ribosomal protein S35, mitochondrial	Mrps35	0.57015	1	-0.0500066	0.965932	0.0342762	1	-0.229579	0.852884	0.120173	1	-0.179573	0.882964	0.557661	1	0.03368	1.02362	0.696462	1	0.0388095	1.02727	0.0862648	0.534589	-0.282932	0.821919	0.0938764	1	-0.321741	0.800104	0.159777	0.837697	0.213184	1.15924	0.427912	0.78707	-0.142237	0.906113	25.0917	25.1606	25.0386	25.1183	25.3225	25.238	25.2345	24.9546	25.0121	25.2699	25.2232
Q78JE5	F-box only protein 22	Fbxo22	0.554135	1	-0.0507216	0.965453	0.0967327	1	0.224944	1.16873	0.0202051	1	0.275666	1.21055	0.00579512	0.536444	0.425131	1.34269	0.829106	1	0.023407	1.01636	0.232524	0.633578	0.199429	1.14824	0.291527	1	0.176022	1.12976	0.696042	0.97422	0.0416247	1.02927	0.29049	0.674262	-0.207484	0.866046	24.3653	24.6657	24.458	24.662	24.6095	24.6175	24.6885	24.5949	24.4321	24.2206	24.1561
Q9CQU0	Thioredoxin domain-containing protein 12	Txndc12	0.561896	1	-0.0534613	0.963622	0.0131949	1	0.167161	1.12285	0.0154082	1	0.220622	1.16524	0.587098	1	0.0311422	1.02182	0.112597	1	-0.170514	0.888526	0.0552213	0.600297	0.176428	1.13008	0.00400437	1	0.346942	1.27186	0.0437589	0.832546	-0.245705	0.843404	0.180761	0.866498	0.0700951	1.04979	26.505	26.5558	26.3789	26.3552	26.3751	26.3344	26.631	26.6775	26.4929	26.2795	26.3677
Q8BZW8	NHL repeat-containing protein 2	Nhlrc2	0.77901	1	-0.0542932	0.963066	0.183154	1	0.232994	1.17527	0.047184	1	0.287287	1.22034	0.513049	1	0.192676	1.14288	0.675523	1	-0.0933278	0.937358	0.260493	0.608572	0.257033	1.19502	0.011298	1	0.350361	1.27488	0.174325	0.817721	-0.310688	0.806257	0.269649	0.729214	-0.153003	0.899377	23.0893	23.0962	23.7678	23.4268	23.0143	23.4114	23.5657	23.3821	23.623	23.1627	22.8778
Q9CR59	Growth arrest and DNA damage-inducible proteins-interacting protein 1	Gadd45gip1	0.392432	1	-0.0580299	0.960575	0.0973828	1	-0.133325	0.911728	0.17193	1	-0.0752953	0.949148	0.814027	1	-0.0212765	0.98536	0.0263451	1	-0.130225	0.913689	0.00746449	0.441553	-0.241533	0.845846	0.115405	1	-0.111308	0.925749	0.67504	0.97729	-0.0324198	0.977779	0.13889	0.743126	-0.122451	0.918626	24.6817	24.4078	24.4633	24.4633	24.6171	24.4681	24.6411	24.5426	24.5413	24.5915	24.5362
Q9CWP6	Motile sperm domain-containing protein 2	Mospd2	0.517277	1	-0.0600857	0.959207	0.13491	1	0.127368	1.0923	0.0295907	1	0.187453	1.13875	0.0052269	0.716033	0.336685	1.26285	0.590444	1	0.0567824	1.04014	0.225654	0.687656	0.144748	1.10554	0.404007	1	0.0879656	1.06287	0.114437	0.850009	0.18523	1.137	0.532033	0.906457	-0.0634896	0.956947	23.8467	24.063	23.8743	24.1162	24.1239	24.1686	24.0855	23.8752	23.9223	23.8195	23.7997
P97742	Carnitine O-palmitoyltransferase 1, liver isoform	Cpt1a	0.711984	1	-0.0606348	0.958842	0.138886	1	0.156454	1.11454	0.135405	1	0.217089	1.16239	0.335729	1	0.272515	1.20791	0.673348	1	-0.0987803	0.933822	0.52263	0.824218	0.0813573	1.05801	0.420353	1	0.180138	1.13299	0.928834	0.984527	0.0277754	1.01944	0.586968	0.909656	-0.0646022	0.956209	29.6758	29.5626	29.5966	29.277	29.4146	29.796	29.5906	29.9043	29.2377	29.2295	29.4361
Q80SW1	S-adenosylhomocysteine hydrolase-like protein 1	Ahcyl1	0.569015	1	-0.0647884	0.956086	0.134435	1	-0.221392	0.857737	0.0772064	1	-0.156604	0.897134	0.816845	1	-0.0350142	0.976022	0.777107	1	0.0268459	1.01878	0.082399	0.575945	-0.210818	0.864047	0.0143538	1	-0.237664	0.848118	0.719587	0.982916	-0.0272156	0.981312	0.111057	0.517724	-0.229865	0.852714	28.012	28.2749	28.5517	28.4397	28.3019	28.4342	28.4201	28.4438	28.3218	28.2878	28.5183
Q6QD59	Vesicle transport protein SEC20	Bnip1	0.656034	1	-0.0673685	0.954377	0.182366	1	0.191047	1.14159	0.0760171	1	0.258416	1.19616	0.0554576	0.524667	0.642303	1.56082	0.47503	1	0.116435	1.08405	0.463587	0.758241	0.118926	1.08593	0.959552	1	0.002491	1.00173	0.00308198	0.450558	0.395126	1.31506	0.143131	0.519969	-0.244685	0.844	26.8941	26.726	27.0501	27.2153	27.2773	27.2744	26.8231	26.9431	26.8758	26.4756	26.7914
P62331	ADP-ribosylation factor 6	Arf6	0.591542	1	-0.0692159	0.953156	0.152326	1	0.192613	1.14283	0.0643674	1	0.261829	1.199	0.459738	1	0.164721	1.12095	0.710614	1	-0.0767657	0.948181	0.187225	0.585641	0.249801	1.18904	0.155706	1	0.326567	1.25403	0.902902	0.983981	-0.0274477	0.981155	0.517288	0.820345	0.134398	1.09763	26.9875	27.214	26.8154	26.9742	26.9727	27.1284	27.0404	27.3614	26.8322	26.722	27.0497
Q9R1Z7	6-pyruvoyl tetrahydrobiopterin synthase	Pts	0.735877	1	-0.0703047	0.952437	0.143878	1	0.517935	1.4319	0.0657139	1	0.58824	1.50341	0.162095	0.692628	1.00287	2.00399	0.72199	1	0.105443	1.07582	0.286971	0.565362	0.417261	1.33539	0.428116	1	0.311818	1.24127	0.534207	0.887472	0.188477	1.13956	0.392907	0.575614	-0.502579	0.705844	23.3202	23.5959	24.081	23.4879	23.8427	23.7666	23.2219	23.9245	23.7021	22.3414	23.2621
P84084	ADP-ribosylation factor 5	Arf5	0.66014	1	-0.0704549	0.952338	0.14707	1	0.187063	1.13844	0.146383	1	0.257518	1.19542	0.0277989	0.893788	0.27499	1.20999	0.99805	1	0.000570297	1.0004	0.182464	0.585659	0.24644	1.18628	0.38697	1	0.245869	1.18581	0.443361	0.854729	0.240226	1.18118	0.334618	0.692179	0.211105	1.15757	27.2137	27.2138	27.1212	27.0054	27.3308	27.3754	26.8969	27.5347	26.9071	27.037	27.1193
P97865	Peroxisomal targeting signal 2 receptor	Pex7	0.491721	1	-0.070969	0.951998	0.16914	1	0.164929	1.12111	0.0850923	1	0.235898	1.17764	0.17823	0.937947	0.447861	1.36402	0.305755	1	0.0740452	1.05266	0.219919	0.669228	0.168635	1.12399	0.492816	1	0.0945899	1.06776	0.0773859	0.83408	0.27388	1.20906	0.725209	0.915304	-0.0793905	0.946457	24.7092	24.8578	24.7973	24.8981	25.1506	24.9512	24.8586	24.8024	24.67	24.4074	24.7987
P28352	DNA-(apurinic or apyrimidinic site) lyase	Apex1	0.378	1	-0.0753135	0.949136	0.136084	1	0.180737	1.13346	0.00882186	1	0.25605	1.1942	0.340697	1	0.241932	1.18258	0.689563	1	-0.0523345	0.964375	0.153013	0.601168	0.213128	1.1592	0.0039079	1	0.265463	1.20202	0.146884	0.911878	0.0851784	1.06082	0.521052	0.854101	0.108709	1.07826	27.2882	27.4056	27.3102	27.0158	27.3666	27.3962	27.2595	27.3617	27.2674	26.9449	27.334
Q9R0P5	Destrin	Dstn	0.363151	1	-0.0791036	0.946646	0.158243	1	0.113354	1.08174	0.0255013	1	0.192458	1.14271	0.282037	1	0.18082	1.13353	0.348498	1	-0.0886752	0.940386	0.185581	0.726776	0.111541	1.08038	0.0735619	1	0.200216	1.14887	0.478036	0.932082	0.0951742	1.06819	0.241039	0.779344	0.11457	1.08265	29.8295	29.6529	29.7174	29.5465	29.7158	29.9297	29.7103	29.8515	29.621	29.5793	29.7046
Q9Z2Q5	39S ribosomal protein L40, mitochondrial	Mrpl40	0.582199	1	-0.0795013	0.946385	0.066268	1	-0.389332	0.763483	0.141914	1	-0.30983	0.806737	0.0682665	1	-0.0879335	0.940869	0.303029	1	-0.21877	0.859298	0.00172936	0.244111	-0.676532	0.625667	0.0872217	1	-0.457762	0.728115	0.422369	0.854111	-0.219577	0.858817	0.0139259	0.143163	-0.589406	0.664617	24.7568	24.5031	24.5592	24.5909	24.5579	24.5427	25.1172	24.4939	24.6985	24.6612	24.6152
Q03249	Galactose-1-phosphate uridylyltransferase	Galt	0.289822	1	-0.0829946	0.944096	0.121574	1	0.179465	1.13246	0.0398053	1	0.262459	1.19952	0.212296	1	0.221354	1.16583	0.741191	1	-0.0379753	0.974021	0.120408	0.565524	0.251888	1.19076	0.144609	1	0.289863	1.22252	0.509885	0.933346	0.0986582	1.07078	0.428957	0.770052	0.167168	1.12285	27.5325	27.6211	27.5279	27.5153	27.6736	27.7092	27.472	27.7954	27.5107	27.3489	27.5911
Q9Z1F9	SUMO-activating enzyme subunit 2	Uba2	0.442078	1	-0.0909658	0.938894	0.0535081	1	0.342872	1.26828	0.0108632	1	0.433838	1.35082	0.138368	1	0.312393	1.24177	0.419535	1	-0.0924822	0.937908	0.0233188	0.387446	0.422318	1.34008	0.0144844	1	0.5148	1.4288	0.249334	0.853188	0.183176	1.13538	0.0670535	0.389941	0.385583	1.30639	25.2454	25.0731	24.9211	24.8445	25.3292	25.1146	25.0602	25.1617	24.8943	24.836	24.9831
Q6URW6	Myosin-14	Myh14	0.462159	1	-0.0960412	0.935597	0.188837	1	0.428553	1.34588	0.0810066	1	0.524594	1.43853	0.674693	1	0.130008	1.0943	0.687089	1	-0.0781829	0.94725	0.0565329	0.379187	0.709469	1.6352	0.045649	1	0.787652	1.72626	0.487002	0.901316	0.139303	1.10137	0.118106	0.282148	0.796947	1.73742	25.0831	25.1585	24.8802	24.7563	25.1226	25.1757	24.7421	25.1818	25.1056	25.285	24.7532
Q91X51	Golgi reassembly-stacking protein 1	Gorasp1	0.571622	1	-0.125528	0.916669	0.12492	1	0.30289	1.23361	0.0238966	1	0.428418	1.34576	0.0919549	0.774933	0.47319	1.38818	0.858211	1	0.0570176	1.04031	0.111364	0.394081	0.455588	1.37134	0.161282	1	0.39857	1.3182	0.450562	0.855594	0.241526	1.18224	0.370388	0.74533	0.166906	1.12265	22.4033	22.3492	22.8468	23.0452	22.9302	22.933	22.371	23.1024	22.5967	22.304	22.6127
Q8VCH6	Delta(24)-sterol reductase	Dhcr24	0.273324	1	-0.146046	0.903724	0.103731	1	0.197329	1.14657	0.0292977	1	0.343375	1.26872	0.0417352	0.706187	0.409128	1.32788	0.582302	1	-0.0975647	0.934609	0.237344	0.632702	0.201975	1.15027	0.216476	1	0.29954	1.23075	0.353636	0.857498	0.217461	1.16269	0.600867	0.871883	0.107872	1.07764	27.6571	27.6073	27.4197	27.4822	27.8048	27.8314	27.5461	27.8899	27.366	27.3237	27.4943
Q58A65	C-Jun-amino-terminal kinase-interacting protein 4	Spag9	0.283664	1	-0.295175	0.814973	0.0683356	1	0.462929	1.37834	0.0186739	1	0.758105	1.69127	0.59433	1	0.287717	1.22071	0.265536	1	-0.383506	0.766573	0.0279448	0.377244	0.688191	1.61126	0.0231511	1	1.0717	2.1019	0.374428	0.835537	-0.422512	0.746124	0.338531	0.582803	0.361467	1.28473	23.6228	23.8203	23.7886	24.2276	24.211	23.602	24.6346	23.8104	24.5419	23.9614	23.2761
Q9DB60	Prostamide/prostaglandin F synthase	Prxl2b	0.190926	1	0.390784	1.31111	0.58734	1	-0.121834	0.919019	0.0468456	1	-0.512619	0.700949	0.114739	0.59763	-0.852524	0.553815	0.264251	1	0.382893	1.30395	0.648544	0.829471	0.0968774	1.06946	0.381493	1	-0.286015	0.820164	0.316975	0.82087	-0.430194	0.742162	0.637305	0.864603	0.136314	1.09909	23.7757	24.1552	24.5072	24.6348	23.7998	23.4389	23.6291	24.0008	24.5186	24.7321	24.2116
P17439	Lysosomal acid glucosylceramidase	Gba	0.0292497	1	0.318487	1.24702	0.852542	1	0.0367062	1.02577	0.165803	1	-0.281781	0.822575	0.710894	1	-0.0850525	0.94275	0.113996	1	0.28398	1.21755	0.366734	0.734658	-0.128953	0.914495	0.081006	1	-0.412933	0.751095	0.29918	0.858621	-0.21756	0.860019	0.0815578	0.312479	-0.545441	0.685182	26.1766	26.4756	26.32	26.3644	25.8501	25.9202	26.1693	26.2925	25.8463	25.7742	26.1662
Q05117	Tartrate-resistant acid phosphatase type 5	Acp5	0.00783894	1	0.306221	1.23646	0.851408	1	0.0363504	1.02552	0.147703	1	-0.269871	0.829394	0.746376	1	-0.140831	0.906997	0.0869569	1	0.2684	1.20447	0.648808	0.83615	-0.0874971	0.941154	0.13065	1	-0.355897	0.781384	0.884203	0.984049	-0.0212539	0.985376	0.545283	0.772966	-0.23632	0.848908	26.7903	26.7791	26.5332	26.7068	26.3062	26.4605	26.5858	26.357	26.2711	26.1523	26.8961
Q9CQA6	Coiled-coil-helix-coiled-coil-helix domain-containing protein 1	Chchd1	0.0556189	1	0.285918	1.21919	0.923773	1	-0.0166899	0.988498	0.0626507	1	-0.302608	0.810785	0.180618	0.933806	-0.453263	0.730389	0.370498	1	0.160732	1.11785	0.869489	0.928982	-0.0414397	0.971685	0.363581	1	-0.202171	0.869241	0.133637	0.829574	-0.216632	0.860572	0.911615	0.978023	0.0344601	1.02417	23.9706	24.1007	23.7302	23.6185	23.5266	23.3516	23.7814	23.6203	23.5656	23.6859	24.0988
Q3TW96	UDP-N-acetylhexosamine pyrophosphorylase-like protein 1	Uap1l1	0.0650379	1	0.262599	1.19964	0.491847	1	0.0606989	1.04297	0.126512	1	-0.2019	0.869405	0.132321	0.813626	-0.469849	0.72204	0.170427	1	0.114929	1.08292	0.475109	0.803178	0.0916602	1.0656	0.836883	1	-0.0232684	0.984001	0.120101	0.836528	-0.31654	0.802994	0.395236	0.79221	0.13004	1.09432	23.0894	23.0388	22.8896	23.0872	22.3861	22.7614	22.9558	22.8378	22.8772	23.0756	23.0116
Q99KI3	ER membrane protein complex subunit 3	Emc3	0.0840306	1	0.256112	1.19426	0.268676	1	0.0886775	1.06339	0.175238	1	-0.167434	0.890425	0.0601304	0.705541	-0.457925	0.728033	0.381263	1	0.125725	1.09106	0.17163	0.671715	0.151951	1.11107	0.813828	1	0.026226	1.01834	0.107439	0.807106	-0.333064	0.793849	0.106676	0.678629	0.151087	1.11041	24.0052	23.8776	24.1652	24.0068	23.6591	23.4565	24.0179	23.9546	23.7	24.0756	23.9558
Q8CCM6	Mitochondrial import inner membrane translocase subunit Tim21	Timm21	0.128994	1	0.243794	1.1841	0.467107	1	0.110209	1.07938	0.0548435	1	-0.133585	0.911563	0.0332664	1	-0.167997	0.890077	0.404529	1	0.15384	1.11253	0.803528	0.916492	0.043197	1.03039	0.299566	1	-0.110643	0.926175	0.612635	0.964704	0.0502561	1.03545	0.287968	0.797677	0.10761	1.07744	23.8762	23.7133	23.1977	23.397	23.3257	23.3392	23.3427	23.3593	23.1445	23.4697	23.5311
Q61207	Prosaposin	Psap	0.0328362	1	0.215825	1.16137	0.644334	1	0.0592996	1.04196	0.184616	1	-0.156526	0.897183	0.80171	1	-0.0612774	0.958415	0.0935104	1	0.219315	1.16418	0.995318	0.997068	-0.000709534	0.999508	0.0988562	1	-0.220025	0.858551	0.504707	0.939656	-0.0817572	0.944906	0.267583	0.628007	-0.240505	0.846449	30.2919	30.3087	30.4213	30.5799	30.0376	30.2335	30.2909	30.2666	30.0945	30.0064	30.3873
Q8VCM8	Nicalin	Ncln	0.199056	1	0.209899	1.15661	0.715705	1	-0.0427383	0.970811	0.0495687	1	-0.252637	0.839361	0.273456	1	-0.305964	0.808902	0.114825	1	0.250139	1.18932	0.561521	0.907317	0.0330524	1.02317	0.180524	1	-0.217087	0.860301	0.451951	0.874984	-0.177828	0.884033	0.452144	0.864762	-0.0889514	0.940206	26.2382	26.7031	26.663	26.6849	26.4303	26.0811	26.5173	26.5936	26.1896	26.6683	26.455
Q505D7	Optic atrophy 3 protein homolog	Opa3	0.10152	1	0.208897	1.1558	0.21083	1	-0.138989	0.908155	0.0100512	1	-0.347886	0.785735	0.238502	1	-0.346982	0.786227	0.178752	1	0.156951	1.11493	0.218019	0.636224	-0.191538	0.875672	0.0738279	1	-0.348488	0.785407	0.872306	0.982393	0.032307	1.02265	0.858141	0.972262	0.0308005	1.02158	25.5857	25.2657	25.2822	25.431	25.4062	24.9971	25.1339	25.0505	25.3235	25.5906	25.5066
Q920R0	Alsin	Als2	0.109564	1	0.202163	1.15042	0.774867	1	-0.0291987	0.979964	0.0776487	1	-0.231361	0.851831	0.790608	1	-0.07654	0.948329	0.112003	1	0.285154	1.21854	0.595619	0.87688	-0.0494219	0.966323	0.0497632	1	-0.334576	0.793017	0.373062	0.858426	0.182801	1.13509	0.688408	0.913157	-0.0752347	0.949188	29.8972	30.061	29.7891	29.96	29.7121	29.9566	29.5043	29.5704	29.8799	29.6897	30.1321
Q99N96	39S ribosomal protein L1, mitochondrial	Mrpl1	0.108815	1	0.19443	1.14427	0.827897	1	0.0185679	1.01295	0.173022	1	-0.175862	0.885239	0.0668733	1	-0.190408	0.876358	0.259664	1	0.218472	1.1635	0.702766	0.887958	0.0523071	1.03692	0.4703	1	-0.166164	0.891209	0.829219	0.97835	0.051034	1.03601	0.677582	0.912295	0.0752773	1.05356	24.9725	24.9868	24.9605	25.0139	24.8679	24.7713	24.4518	24.8423	25.0117	25.029	24.9911
Q8BFY9	Transportin-1	Tnpo1	0.0839159	1	0.165891	1.12186	0.717994	1	-0.0376898	0.974214	0.102025	1	-0.203581	0.868392	0.606218	1	0.0937433	1.06714	0.0132356	1	0.273361	1.20862	0.132358	0.688802	-0.128436	0.914822	0.00983408	1	-0.401797	0.756915	0.137684	0.835713	0.214625	1.1604	0.101853	0.466218	-0.280915	0.823069	25.6114	25.7389	25.702	25.6528	25.5397	25.7386	25.5383	25.3972	25.3381	25.6639	25.4269
Q8BFR4	N-acetylglucosamine-6-sulfatase	Gns	0.139881	1	0.152156	1.11123	0.354885	1	-0.0981271	0.934245	0.0104415	1	-0.250283	0.840731	0.0837285	0.926428	-0.325162	0.798209	0.144142	1	0.195358	1.14501	0.967659	0.988331	-0.00500552	0.996536	0.164771	1	-0.200364	0.870331	0.642443	0.9626	-0.0552931	0.962399	0.633524	0.909129	0.0695051	1.04936	24.392	24.8004	24.5572	24.6022	24.4543	24.3509	24.303	24.5464	24.5243	24.6416	24.814
Q3UKJ7	WD40 repeat-containing protein SMU1	Smu1	0.181113	1	0.102333	1.07351	0.815648	1	-0.021529	0.985188	0.124842	1	-0.123862	0.917728	0.974781	1	-0.00443172	0.996933	0.245222	1	0.118776	1.08581	0.515444	0.816241	-0.0847066	0.942976	0.0891852	1	-0.203482	0.868452	0.249515	0.906434	0.0963926	1.0691	0.497845	0.857256	-0.102658	0.931316	25.6266	25.6517	25.5839	25.3789	25.4412	25.5904	25.4612	25.4355	25.3615	25.4209	25.6195
Q9CY58	Plasminogen activator inhibitor 1 RNA-binding protein	Serbp1	0.168827	1	0.0900308	1.06439	0.881268	1	-0.00873327	0.993965	0.148902	1	-0.098764	0.933833	0.934298	1	-0.0100012	0.993092	0.162644	1	0.138863	1.10104	0.379109	0.934154	-0.019076	0.986865	0.119025	1	-0.157939	0.896304	0.691605	0.974136	0.044838	1.03157	0.291132	0.80854	-0.1031	0.93103	29.7048	29.809	29.8131	29.863	29.7282	29.7405	29.7323	29.8005	29.5357	29.6371	29.8515
Q9Z2I0	Mitochondrial proton/calcium exchanger protein	Letm1	0.0803304	1	0.0818211	1.05835	0.75437	1	-0.0180164	0.98759	0.0967286	1	-0.0998375	0.933138	0.67015	1	-0.0366125	0.974941	0.0881765	1	0.074077	1.05269	0.122722	0.8026	-0.0679105	0.954019	0.00933417	1	-0.141987	0.90627	0.338082	0.940601	-0.0649363	0.955988	0.0182114	0.567401	-0.170311	0.888651	28.9041	28.9891	28.9267	29.0154	28.7696	28.9065	28.9318	28.8648	28.9124	28.8462	28.9031
Q9WTI7	Unconventional myosin-Ic	Myo1c	0.122228	1	0.0606147	1.04291	0.389616	1	-0.0625192	0.957591	0.102122	1	-0.123134	0.918191	0.831541	1	-0.0444851	0.969636	0.0229931	1	0.0830777	1.05928	0.0790067	0.739507	-0.0924886	0.937903	0.0146551	1	-0.175566	0.88542	0.372575	0.946048	0.0625906	1.04434	0.647243	0.912608	-0.0684907	0.953635	26.6788	26.6501	26.6902	26.6653	26.5756	26.7205	26.6141	26.5952	26.547	26.8617	26.5233
P62880	Guanine nucleotide-binding protein G(I)/G(S)/G(T) subunit beta-2	Gnb2	0.106834	1	0.0514516	1.03631	0.260671	1	-0.0482684	0.967096	0.023039	1	-0.09972	0.933214	0.39273	1	-0.0568151	0.961384	0.138199	1	0.046854	1.03301	0.157181	0.769495	-0.0814692	0.945095	0.0714032	1	-0.128323	0.914894	0.333178	0.963991	0.0409196	1.02877	0.691381	0.959621	-0.0305885	0.979021	29.0447	28.958	28.972	28.9525	28.9761	28.9337	28.9182	28.8693	28.9544	28.9636	29.0598
Q9WUM3	Coronin-1B	Coro1b	0.121056	1	-0.103225	0.930949	0.848264	1	-0.0122621	0.991537	0.181624	1	0.0909634	1.06508	0.280975	1	0.157798	1.11558	0.224512	1	-0.0778713	0.947455	0.642854	0.915813	-0.0314643	0.978427	0.542133	1	0.0464071	1.03269	0.0906068	0.859312	0.140935	1.10262	0.799053	0.96547	0.0295445	1.02069	28.048	27.9626	27.8607	27.9484	28.1324	28.153	28.0675	27.9184	28.0194	27.8775	28.0922
O35593	26S proteasome non-ATPase regulatory subunit 14	Psmd14	0.166706	1	-0.103577	0.930722	0.218099	1	0.0943119	1.06756	0.0396015	1	0.197889	1.14702	0.297417	1	0.172276	1.12684	0.684563	1	-0.036143	0.975259	0.0332961	0.586208	0.178822	1.13196	0.0947183	1	0.214965	1.16068	0.420423	0.91485	0.107818	1.0776	0.251031	0.727477	0.150506	1.10996	27.7803	27.878	27.8971	27.8575	28.0849	27.9581	27.8845	28.0678	27.7887	27.7434	27.9551
P20108	Thioredoxin-dependent peroxide reductase, mitochondrial	Prdx3	0.0494518	1	-0.124488	0.917329	0.820277	1	0.0186321	1.013	0.0641158	1	0.143121	1.10429	0.597303	1	0.0581894	1.04116	0.260277	1	-0.0994689	0.933377	0.223158	0.743059	0.100272	1.07198	0.0124026	1	0.199741	1.14849	0.315531	0.941394	0.0685555	1.04867	0.0612923	0.509201	0.210107	1.15677	29.9833	29.9031	29.9143	30.1037	30.1775	30.106	30.1141	29.9951	30.1104	30.17	29.9971
Q922Y1	UBX domain-containing protein 1	Ubxn1	0.116903	1	-0.124559	0.917285	0.910561	1	0.00960007	1.00668	0.132118	1	0.134159	1.09745	0.564742	1	0.13535	1.09836	0.284587	1	-0.104445	0.930163	0.71143	0.926688	0.0289199	1.02025	0.206916	1	0.133364	1.09685	0.803329	0.984176	-0.0313094	0.978532	0.835377	0.965765	-0.0332953	0.977186	25.8949	26.0708	25.9296	26.0759	26.1949	26.0022	26.0218	26.2602	26.1076	25.7903	26.1361
P61161	Actin-related protein 2	Actr2	0.125788	1	-0.125116	0.91693	0.819107	1	0.0131216	1.00914	0.0815595	1	0.138237	1.10056	0.11186	1	0.248856	1.18826	0.546359	1	-0.0551618	0.962486	0.905352	0.972169	0.00933011	1.00649	0.549306	1	0.0644919	1.04572	0.414393	0.911977	0.111236	1.08015	0.446403	0.885497	-0.0731277	0.950575	28.332	28.4316	28.4986	28.3714	28.5112	28.6893	28.566	28.5627	28.3384	28.3323	28.3705
Q5BL07	Peroxisome biogenesis factor 1	Pex1	0.189608	1	-0.127028	0.915716	0.684327	1	0.0548491	1.03875	0.182241	1	0.181877	1.13436	0.6882	1	0.0793285	1.05653	0.26895	1	-0.109189	0.927109	0.425469	0.735176	0.141053	1.10271	0.179819	1	0.250242	1.18941	0.487812	0.922825	0.10987	1.07913	0.237649	0.570818	0.280784	1.21485	25.2816	25.2932	25.1752	25.0633	25.5587	25.2338	25.1842	25.3111	25.3639	25.3701	25.2637
Q3B7Z2	Oxysterol-binding protein 1	Osbp	0.107632	1	-0.127107	0.915666	0.697969	1	0.0260637	1.01823	0.0702943	1	0.15317	1.11201	0.225778	1	0.114908	1.08291	0.334431	1	-0.107762	0.928027	0.421964	0.828391	0.0709165	1.05038	0.168681	1	0.178679	1.13185	0.565886	0.945778	0.0768439	1.05471	0.19325	0.72838	0.140614	1.10237	26.342	26.2264	26.2745	26.3884	26.4207	26.5414	26.5722	26.2903	26.3501	26.394	26.3383
Q9CPS6	Histidine triad nucleotide-binding protein 3	Hint3	0.188708	1	-0.128616	0.914709	0.778526	1	0.0237121	1.01657	0.130437	1	0.152328	1.11136	0.328446	1	0.163064	1.11966	0.273157	1	-0.15354	0.899042	0.935268	0.977338	-0.00836945	0.994216	0.376127	1	0.14517	1.10586	0.794044	0.978136	0.0447928	1.03154	0.860657	0.973202	0.026899	1.01882	24.4576	24.2917	24.2199	24.3471	24.5522	24.4169	24.5935	24.2142	24.5115	24.2137	24.4292
Q9D9V3	Ethylmalonyl-CoA decarboxylase	Echdc1	0.182729	1	-0.130486	0.913524	0.319241	1	0.0689387	1.04894	0.0251491	1	0.199425	1.14824	0.0529728	0.88739	0.311332	1.24085	0.715778	1	-0.0410557	0.971943	0.42244	0.80751	0.0837644	1.05978	0.19841	1	0.12482	1.09037	0.0919881	0.823434	0.212137	1.1584	0.771871	0.968198	0.0256252	1.01792	28.264	28.4428	28.1783	28.2258	28.554	28.517	28.3651	28.4116	28.1935	28.1518	28.2965
Q91XL9	Oxysterol-binding protein-related protein 1	Osbpl1a	0.0907354	1	-0.139516	0.907824	0.418628	1	0.0677367	1.04807	0.0450642	1	0.207253	1.15449	0.625062	1	0.102839	1.07388	0.0878744	1	-0.205854	0.867025	0.389395	0.821347	0.071008	1.05045	0.0524068	1	0.276862	1.21156	0.272046	0.86778	-0.145128	0.904299	0.862246	0.972316	0.0288941	1.02023	26.8655	26.7489	26.8655	26.8826	26.9273	26.8589	27.173	27.0498	26.8918	26.6137	26.9668
Q9D358	Low molecular weight phosphotyrosine protein phosphatase	Acp1	0.0649865	1	-0.157399	0.89664	0.834474	1	-0.0229441	0.984222	0.180465	1	0.134455	1.09768	0.284033	1	0.0215635	1.01506	0.126133	1	-0.146982	0.903138	0.3774	0.83329	0.062734	1.04444	0.0200945	1	0.209716	1.15646	0.124538	0.857648	0.136318	1.0991	0.00261706	0.296277	0.324471	1.25221	27.148	27.0858	26.8994	26.9295	27.2605	27.2493	27.1328	27.1968	27.0261	27.2196	27.2471
P52792	Hexokinase-4	Gck	0.135478	1	-0.160808	0.894524	0.805398	1	0.0372481	1.02615	0.138953	1	0.198056	1.14715	0.33383	1	0.396247	1.31608	0.645706	1	-0.0507743	0.965418	0.875156	0.958443	0.0151545	1.01056	0.351141	1	0.0659288	1.04676	0.302213	0.886305	0.120344	1.08699	0.424286	0.728142	-0.209974	0.864553	28.4583	28.7713	28.5356	28.8106	28.9642	28.7898	28.6815	28.8652	28.7232	28.1794	28.782
O08709	Peroxiredoxin-6	Prdx6	0.147793	1	-0.161634	0.894012	0.946246	1	0.00747871	1.0052	0.163188	1	0.169113	1.12437	0.312514	1	0.323063	1.25098	0.871572	1	-0.0163956	0.9887	0.553863	0.873459	0.0500844	1.03533	0.515772	1	0.06648	1.04716	0.0873369	0.818169	0.247854	1.18744	0.966694	0.993616	-0.0087293	0.993968	32.5098	32.7371	32.5824	32.7631	32.9578	32.9591	32.863	32.6489	32.62	32.3941	32.8767
O35604	NPC intracellular cholesterol transporter 1	Npc1	0.197584	1	-0.169458	0.889177	0.552817	1	0.107688	1.0775	0.152627	1	0.277146	1.2118	0.839659	1	0.0678129	1.04813	0.39949	1	-0.144241	0.904855	0.0382484	0.463308	0.27246	1.20787	0.0517843	1	0.416701	1.33487	0.573154	0.92062	0.134491	1.09771	0.0979593	0.376684	0.483379	1.39801	23.2344	23.1882	22.9908	23.1812	23.5541	23.2435	23.2436	23.5144	23.0349	23.08	23.582
Q91WU5	Arsenite methyltransferase	As3mt	0.170709	1	-0.179097	0.883256	0.925847	1	-0.00732231	0.994937	0.168491	1	0.171775	1.12644	0.0880143	1	0.268435	1.2045	0.413688	1	-0.086511	0.941798	0.715292	0.938603	0.0208232	1.01454	0.37135	1	0.107334	1.07724	0.0700995	0.818631	0.337941	1.26395	0.143168	0.647443	0.17684	1.13041	28.6669	28.524	28.4935	28.4721	28.8962	28.9458	28.58	28.7469	28.4222	28.5708	28.7342
Q9CX56	26S proteasome non-ATPase regulatory subunit 8	Psmd8	0.0962455	1	-0.179644	0.882921	0.698728	1	-0.0280285	0.98076	0.115843	1	0.151616	1.11081	0.672214	1	0.0866375	1.06189	0.264629	1	-0.143473	0.905337	0.51964	0.867295	0.0514609	1.03631	0.145443	1	0.194934	1.14467	0.977597	0.998879	0.00519053	1.0036	0.288305	0.790676	0.113487	1.08184	26.6157	26.8067	26.8061	26.6433	26.7448	27.0566	27.0173	26.9641	26.7052	26.897	26.7312
Q8BK72	28S ribosomal protein S27, mitochondrial	Mrps27	0.061436	1	-0.180443	0.882432	0.85142	1	0.0131259	1.00914	0.0294745	1	0.193569	1.14359	0.272635	1	0.106463	1.07659	0.0104867	1	-0.299926	0.812294	0.618084	0.881846	-0.0482864	0.967084	0.0441563	1	0.25164	1.19056	0.0791358	0.821293	-0.200326	0.870354	0.611148	0.923415	-0.0551494	0.962495	25.532	25.4397	25.4058	25.2782	25.5428	25.4056	25.5874	25.7062	25.7299	25.3861	25.3493
Q8VDG5	Phosphopantothenate--cysteine ligase	Ppcs	0.183321	1	-0.192963	0.874807	0.850741	1	0.0239785	1.01676	0.0375199	1	0.216942	1.16227	0.106694	1	0.174768	1.12878	0.473301	1	-0.132153	0.912469	0.492611	0.774498	0.112904	1.0814	0.182175	1	0.245057	1.18514	0.691659	0.962505	-0.0675316	0.954269	0.984347	0.997301	0.00275739	1.00191	26.1196	26.702	26.3829	26.3276	26.5284	26.5425	26.7548	26.6873	26.3669	26.2989	26.4225
Q80W22	Threonine synthase-like 2	Thnsl2	0.0936768	1	-0.202273	0.86918	0.697106	1	-0.0439129	0.97002	0.0927669	1	0.15836	1.11602	0.110798	1	0.274935	1.20994	0.417895	1	-0.0813777	0.945155	0.994062	0.996863	-0.000733693	0.999492	0.553088	1	0.080644	1.05749	0.614466	0.956044	0.070151	1.04983	0.396117	0.797871	-0.12414	0.917551	27.2421	27.6615	27.5934	27.5853	27.6903	27.8397	27.668	27.8569	27.5595	27.4235	27.5565
Q922E4	Ethanolamine-phosphate cytidylyltransferase	Pcyt2	0.0877371	1	-0.204845	0.867632	0.361847	1	0.087357	1.06242	0.0399625	1	0.292202	1.22451	0.103596	0.938263	0.341506	1.26708	0.208201	1	-0.0747827	0.949485	0.129217	0.624885	0.184549	1.13646	0.0675421	1	0.259332	1.19692	0.0557911	0.82171	0.320143	1.24845	0.146653	0.538476	0.237969	1.17933	29.7582	29.7906	29.7216	29.7866	30.043	30.2794	29.8562	29.9096	29.7574	29.8364	29.8029
Q91V64	Isochorismatase domain-containing protein 1	Isoc1	0.0980951	1	-0.210681	0.864129	0.855159	1	-0.0213701	0.985297	0.0827338	1	0.189311	1.14022	0.430259	1	0.191652	1.14207	0.213445	1	-0.251911	0.839783	0.65468	0.86332	-0.0641607	0.956502	0.229418	1	0.18775	1.13899	0.933012	0.988811	-0.0141754	0.990222	0.918402	0.988713	-0.0180772	0.987548	27.669	27.766	27.3782	27.4361	27.7693	27.7596	28.0118	27.7131	27.611	27.3774	27.7682
Q8VDG7	Platelet-activating factor acetylhydrolase 2, cytoplasmic	Pafah2	0.0924417	1	-0.222368	0.857157	0.845213	1	0.02141	1.01495	0.0737413	1	0.243778	1.18409	0.143956	0.911951	0.379198	1.30062	0.438571	1	-0.0899626	0.939547	0.71461	0.874531	0.0635357	1.04502	0.399065	1	0.153498	1.11226	0.217027	0.838177	0.240375	1.1813	0.942357	0.990027	0.0146755	1.01022	25.7965	26.0127	26.0164	25.7957	26.1109	26.4329	25.9797	26.1795	25.9354	25.8757	25.9098
Q9CU62	Structural maintenance of chromosomes protein 1A	Smc1a	0.174678	1	-0.224187	0.856077	0.815511	1	0.0494305	1.03486	0.126387	1	0.273618	1.20884	0.344799	1	0.200693	1.14925	0.570974	1	-0.129111	0.914395	0.549178	0.735751	0.193123	1.14324	0.244134	1	0.322234	1.25026	0.34453	0.866733	0.160403	1.1176	0.410336	0.677163	0.281944	1.21583	25.7809	25.9244	25.5586	26.2306	26.3303	26.0578	25.8824	26.1447	26.0738	25.9027	26.084
Q8BVI4	Dihydropteridine reductase	Qdpr	0.11303	1	-0.227006	0.854406	0.687577	1	0.0359491	1.02523	0.078427	1	0.262955	1.19993	0.129379	0.854	0.442261	1.35873	0.552613	1	-0.0345434	0.976341	0.225913	0.734011	0.108875	1.07839	0.180408	1	0.143419	1.10452	0.0128415	0.481522	0.420924	1.33878	0.489738	0.825743	0.122082	1.0883	31.219	31.3542	31.2866	31.3054	31.833	31.7087	31.3279	31.4444	31.2776	31.1632	31.494
Q3UE37	Ubiquitin-conjugating enzyme E2 Z	Ube2z	0.0269754	1	-0.234338	0.850075	0.285782	1	-0.0989094	0.933739	0.100174	1	0.135429	1.09842	0.541323	1	0.0904293	1.06469	0.0715159	1	-0.270104	0.82926	0.261143	0.741914	-0.104676	0.930014	0.167886	1	0.165428	1.1215	0.759881	0.977812	0.0391369	1.0275	0.35568	0.801851	0.114136	1.08233	23.1834	22.8927	22.9301	23.1104	23.3226	23.2513	23.1391	23.1819	23.4225	23.0779	23.3152
P48722	Heat shock 70 kDa protein 4L	Hspa4l	0.073195	1	-0.239392	0.847102	0.978523	1	-0.00434904	0.99699	0.140134	1	0.235043	1.17694	0.265862	1	0.198422	1.14744	0.28826	1	-0.16585	0.891403	0.666909	0.835736	0.0936063	1.06703	0.228241	1	0.259457	1.19703	0.128953	0.822955	0.240421	1.18134	0.276177	0.577819	0.301455	1.23239	24.6699	24.4328	24.5025	24.8029	25.0729	24.8985	24.893	24.663	24.6798	24.8833	24.6912
Q80W21	Glutathione S-transferase Mu 7	Gstm7	0.0331756	1	-0.248762	0.841618	0.949301	1	-0.00403337	0.997208	0.0290673	1	0.244728	1.18487	0.0374923	0.777743	0.349106	1.27377	0.102269	1	-0.163696	0.892735	0.893878	0.96412	0.0114473	1.00797	0.159475	1	0.175144	1.12908	0.0765534	0.833688	0.27001	1.20582	0.397638	0.841163	0.096048	1.06884	27.7715	27.6333	27.7439	27.6619	28.1756	28.0512	27.8409	27.966	27.7233	27.7331	27.7955
P56873	Protein ZNRD2	Znrd2	0.0986985	1	-0.254811	0.838097	0.856515	1	-0.0263259	0.981918	0.180246	1	0.228485	1.1716	0.278967	1	0.423976	1.34162	0.169507	1	-0.221029	0.857953	0.422559	0.749813	-0.122871	0.918358	0.587591	1	0.0981579	1.07041	0.916691	0.983562	-0.028566	0.980394	0.12996	0.442917	-0.354384	0.782203	24.6708	24.9799	24.8111	24.7638	24.7715	25.3167	24.9898	25.2991	24.929	24.5268	24.7133
P35585	AP-1 complex subunit mu-1	Ap1m1	0.125668	1	-0.264514	0.832479	0.77637	1	0.0488508	1.03444	0.116266	1	0.313364	1.2426	0.438129	1	0.45472	1.37052	0.234768	1	-0.13098	0.913211	0.590907	0.828014	0.0881468	1.063	0.233378	1	0.219127	1.16403	0.576354	0.909473	0.165023	1.12118	0.833989	0.948202	-0.0705706	0.952261	29.593	29.7584	29.9662	29.8647	29.8275	30.4908	30.0124	29.8613	30.1086	29.3666	30.0422
P25911	Tyrosine-protein kinase Lyn	Lyn	0.0900256	1	-0.271671	0.828359	0.40977	1	0.0801372	1.05712	0.0351209	1	0.351809	1.27616	0.064009	0.658435	0.544933	1.45895	0.41781	1	-0.163279	0.892993	0.655508	0.869714	0.0597801	1.04231	0.334332	1	0.223059	1.16721	0.303345	0.847414	0.279329	1.21363	0.821236	0.960323	-0.042546	0.97094	23.7665	23.7967	23.6377	23.825	24.2545	24.137	24.1227	24.0501	23.5765	23.7833	23.5183
Q8R4U0	Stabilin-2	Stab2	0.0207837	1	-0.272679	0.827781	0.702892	1	-0.0606858	0.958808	0.106055	1	0.211993	1.15829	0.515457	1	0.225204	1.16894	0.00463482	1	-0.399287	0.758233	0.199888	0.637206	-0.196101	0.872907	0.135806	1	0.203186	1.15124	0.0716284	0.872706	-0.108169	0.927765	0.642741	0.867611	-0.130186	0.913713	25.1618	24.6959	24.9238	24.8656	25.0728	25.1664	25.2497	25.2329	25.2006	24.6107	25.178
P12382	ATP-dependent 6-phosphofructokinase, liver type	Pfkl	0.00364403	1	-0.27283	0.827694	0.761307	1	-0.0327114	0.977581	0.0322597	1	0.240119	1.18109	0.355529	1	0.139957	1.10187	0.0401272	1	-0.217693	0.85994	0.481027	0.808034	0.0892003	1.06378	0.0466384	1	0.306893	1.23704	0.473146	0.941792	0.0722214	1.05133	0.183353	0.577612	0.239157	1.1803	26.6867	26.7816	26.8978	26.6958	26.9897	27.1736	27.0845	27.0085	26.9353	26.8687	27.0147
Q9D7I5	Phospholysine phosphohistidine inorganic pyrophosphate phosphatase	Lhpp	0.145511	1	-0.286009	0.820168	0.897627	1	0.0198715	1.01387	0.0707992	1	0.305881	1.23617	0.0127625	0.541829	0.526803	1.44073	0.314136	1	-0.172487	0.887312	0.950451	0.972219	-0.013888	0.99042	0.366098	1	0.158599	1.1162	0.00500871	0.393333	0.470773	1.38585	0.637044	0.8856	0.102569	1.07368	27.9558	27.5173	27.9476	27.5051	28.243	28.3569	27.7854	27.9012	27.8009	27.7539	27.7923
Q9QXF8	Glycine N-methyltransferase	Gnmt	0.0174885	1	-0.289763	0.818036	0.261372	1	-0.108826	0.927342	0.125473	1	0.180937	1.13362	0.108601	0.812167	0.452433	1.36835	0.130005	1	-0.171177	0.888118	0.0452917	0.603327	-0.171237	0.888081	0.999497	1	-5.97636e-05	0.999959	0.143067	0.823677	0.236027	1.17774	0.160808	0.588353	-0.216466	0.860671	33.2245	33.4001	33.3115	33.2519	33.8121	33.6446	33.6279	33.4951	33.354	33.1365	33.4154
P15626	Glutathione S-transferase Mu 2	Gstm2	0.11222	1	-0.301389	0.811471	0.641776	1	-0.0494627	0.966296	0.138404	1	0.251926	1.1908	0.101068	0.820296	0.413612	1.33202	0.0955967	1	-0.146337	0.903542	0.981534	0.995342	-0.00220108	0.998475	0.0842547	1	0.144136	1.10507	0.016098	0.425101	0.522311	1.43625	0.0531626	0.461859	0.252834	1.19155	33.2188	32.8768	33.0379	33.0953	33.5323	33.8116	33.1189	33.174	33.1561	33.2868	33.2299
Q61586	Glycerol-3-phosphate acyltransferase 1, mitochondrial	Gpam	0.0535667	1	-0.302664	0.810754	0.651414	1	-0.0409565	0.97201	0.0442226	1	0.261707	1.1989	0.797316	1	0.0303135	1.02123	0.0517598	1	-0.404102	0.755707	0.932344	0.969584	0.0118682	1.00826	0.0328797	1	0.41597	1.3342	0.143122	0.825615	-0.302474	0.810861	0.47806	0.87633	0.0831827	1.05935	27.3546	27.5933	27.4701	27.2352	27.4329	27.636	28.0155	27.8378	27.6576	27.4839	27.5245
O35660	Glutathione S-transferase Mu 6	Gstm6	0.00229479	1	-0.302669	0.810751	0.988794	1	0.00221415	1.00154	0.0542488	1	0.304883	1.23532	0.0746135	0.773542	0.434535	1.35148	0.0380401	1	-0.258021	0.836234	0.8562	0.930084	-0.0395724	0.972943	0.369165	1	0.218449	1.16348	0.974303	0.997805	0.00348091	1.00242	0.498534	0.762504	-0.212605	0.862977	28.0889	28.1967	28.3156	28.2734	28.5226	28.5242	28.4409	28.6741	28.4447	27.963	28.2147
Q8BVG4	Dipeptidyl peptidase 9	Dpp9	0.080904	1	-0.31717	0.802643	0.886893	1	0.0230877	1.01613	0.0818223	1	0.340258	1.26598	0.963411	1	0.013381	1.00932	0.071933	1	-0.447488	0.733319	0.549188	0.797345	0.110687	1.07974	0.0555819	1	0.558175	1.47241	0.491641	0.877258	-0.202204	0.869222	0.196079	0.474766	0.34259	1.26803	23.3589	23.0301	23.1016	23.3518	23.6242	23.1887	23.7205	23.8053	23.3002	23.5322	23.2539
Q920E5	Farnesyl pyrophosphate synthase	Fdps	0.0657969	1	-0.321125	0.800445	0.623585	1	0.0860775	1.06148	0.0483105	1	0.407203	1.32611	0.0218561	0.590476	0.449282	1.36536	0.29979	1	-0.212568	0.863	0.527456	0.740249	0.166581	1.1224	0.211079	1	0.37915	1.30058	0.173596	0.825159	0.330898	1.2578	0.414367	0.694365	0.260766	1.19811	31.2433	31.2363	31.2821	30.926	31.6266	31.7566	31.4127	31.5716	31.0977	31.2239	31.2606
P53798	Squalene synthase	Fdft1	0.0843949	1	-0.327813	0.796743	0.71113	1	0.0919532	1.06581	0.105867	1	0.419766	1.33771	0.212792	1	0.285292	1.21866	0.210217	1	-0.357857	0.780323	0.694701	0.813584	0.151559	1.11077	0.265188	1	0.509416	1.42347	0.910731	0.983194	0.0348244	1.02443	0.594566	0.781532	0.258949	1.19661	26.3186	26.0127	26.3944	26.0209	26.3878	26.683	26.7153	26.6943	26.092	26.1936	26.3065
F2Z3U3	Ras association (RalGDS/AF-6) and pleckstrin homology domains 1	Raph1	0.0878899	1	-0.359802	0.779272	0.986797	1	0.00278673	1.00193	0.0324903	1	0.362589	1.28573	0.509806	1	0.0991402	1.07113	0.094902	1	-0.513566	0.700489	0.926365	0.956596	0.0246544	1.01724	0.0363259	1	0.538221	1.45218	0.0690984	0.807023	-0.385745	0.765383	0.806266	0.952181	0.0533352	1.03766	22.7327	22.7975	23.0632	22.3439	22.8784	22.847	23.3148	23.3918	23.0388	22.8872	22.6399
Q9JJK2	LanC-like protein 2	Lancl2	0.132098	1	-0.375753	0.770703	0.781475	1	0.0649299	1.04603	0.149667	1	0.440683	1.35725	0.904369	1	0.0732527	1.05209	0.256131	1	-0.331227	0.79486	0.00676155	0.390547	0.354409	1.27846	0.0561382	1	0.685636	1.60841	0.900029	0.984513	0.0620591	1.04395	0.077758	0.212179	0.674442	1.59598	23.0213	23.0671	23.0874	23.1459	23.9242	23.0625	22.9332	23.6747	23.6861	23.7443	23.096
Q8BJU2	Tetraspanin-9	Tspan9	0.00295004	1	-0.399238	0.758259	0.807737	1	-0.0417979	0.971444	0.0483368	1	0.35744	1.28115	0.113775	1	0.250605	1.18971	0.0623966	1	-0.329073	0.796048	0.673314	0.834195	0.0995909	1.07147	0.134712	1	0.428664	1.34599	0.384845	0.886032	0.134959	1.09806	0.334891	0.604752	0.313018	1.2423	22.3759	22.5557	22.4736	22.2927	22.9272	22.8822	22.7554	22.9534	22.6004	22.5642	22.744
Q99JF5	Diphosphomevalonate decarboxylase	Mvd	0.113069	1	-0.427509	0.743544	0.907799	1	0.0287758	1.02015	0.124541	1	0.456285	1.372	0.122676	0.907324	0.375238	1.29705	0.342111	1	-0.328039	0.796619	0.507345	0.730518	0.182278	1.13467	0.218275	1	0.510316	1.42436	0.301611	0.809471	0.443799	1.36018	0.146742	0.385301	0.578876	1.49369	26.2465	26.1569	25.9361	25.71	26.7268	26.6855	26.7365	26.2698	25.7807	26.1872	26.4746
Q60823	RAC-beta serine/threonine-protein kinase	Akt2	0.0293832	1	-0.4384	0.737953	0.340859	1	-0.195734	0.873129	0.147712	1	0.242666	1.18318	0.733989	1	0.0868454	1.06205	0.174913	1	-0.345394	0.787093	0.996525	0.997396	0.00115204	1.0008	0.109363	1	0.346546	1.27151	0.573875	0.927426	0.118549	1.08564	0.153214	0.443166	0.37825	1.29976	24.1062	24.4427	24.5247	23.8983	24.5337	24.9713	24.6438	24.7553	24.5028	24.7061	24.6252
P60334	Cysteine dioxygenase type 1	Cdo1	0.115237	1	-0.493705	0.710199	0.826136	1	0.0720632	1.05122	0.108297	1	0.565768	1.48018	0.296646	1	0.479608	1.39436	0.556989	1	-0.159958	0.895051	0.172252	0.444986	0.46325	1.37864	0.00917578	1	0.623208	1.5403	0.0265951	0.350324	0.746602	1.67784	0.0365248	0.139078	0.890203	1.85344	26.4384	26.1476	27.0064	26.5826	27.7247	27.2462	26.7641	26.7768	26.6756	26.7604	27.2512
Q6PDG5	SWI/SNF complex subunit SMARCC2	Smarcc2	0.0986485	1	-0.507165	0.703604	0.999679	1	0.000106144	1.00007	0.132941	1	0.507272	1.42136	0.117154	0.767795	0.557995	1.47222	0.262211	1	-0.423058	0.745842	0.890663	0.930503	0.0503979	1.03555	0.3694	1	0.473456	1.38843	0.370289	0.821012	0.465601	1.38089	0.450824	0.657588	0.381063	1.3023	23.5836	23.0867	23.1981	23.2404	24.2723	23.8551	23.3225	24.2384	23.2334	23.5289	23.4826
P13516;Q99PL7;P13011	Acyl-CoA desaturase 1;Acyl-CoA desaturase 3;Acyl-CoA desaturase 2	Scd1;Scd3	0.109672	1	-0.532986	0.691123	0.453997	1	-0.202607	0.868979	0.107255	1	0.330378	1.25734	0.435635	1	0.333608	1.26016	0.435549	1	-0.254499	0.838278	0.795727	0.889243	0.073726	1.05243	0.252961	1	0.328225	1.25547	0.674515	0.933746	0.163883	1.1203	0.495658	0.792852	0.1585	1.11613	26.1122	26.7024	27.4015	26.7878	27.7155	27.0491	26.9958	27.0526	27.6067	27.1383	26.959
Q8BJ71	Nuclear pore complex protein Nup93	Nup93	0.24168	1	0.416134	1.33435	0.996014	1	-0.000575542	0.999601	0.188289	1	-0.41671	0.749131	0.483999	1	-0.0677834	0.954103	0.201802	1	0.659332	1.57935	0.956021	0.978107	0.010004	1.00696	0.211122	1	-0.649328	0.637577	0.311658	0.830783	0.655746	1.57543	0.693926	0.913746	0.0742022	1.05278	24.0757	23.9138	23.862	24.2221	24.0495	23.9419	22.6232	24.0687	23.328	24.1221	24.0049
O89086	RNA-binding protein 3	Rbm3	0.335097	1	0.258872	1.19654	0.503737	1	-0.0801627	0.945951	0.140099	1	-0.339035	0.79057	0.457257	1	-0.242639	0.845198	0.377859	1	0.360881	1.28421	0.816826	0.920369	-0.0424188	0.971026	0.296123	1	-0.403299	0.756127	0.724831	0.943855	0.179476	1.13247	0.873027	0.980616	0.0188157	1.01313	25.3851	25.2436	25.7863	25.488	25.5771	25.072	24.5045	25.5933	25.3374	25.4853	25.6491
Q9CQ91	NADH dehydrogenase [ubiquinone] 1 alpha subcomplex subunit 3	Ndufa3	0.428098	1	0.22631	1.16984	0.240022	1	-0.355633	0.781527	0.0844785	1	-0.581943	0.668064	0.256371	0.883454	-0.754302	0.592833	0.742906	1	0.108681	1.07824	0.282424	0.573388	-0.358355	0.780053	0.269411	1	-0.467037	0.723449	0.203257	0.820993	-0.571867	0.672746	0.590794	0.776096	-0.284602	0.820968	25.6498	25.7916	26.2269	26.2642	25.3356	25.4918	25.6362	25.8052	26.5153	26.6411	25.6948
O35623	BET1 homolog	Bet1	0.301455	1	0.214852	1.16059	0.53115	1	-0.18513	0.87957	0.12746	1	-0.399982	0.757868	0.660621	1	-0.160106	0.894959	0.719553	1	0.106432	1.07656	0.162712	0.442328	-0.453468	0.730285	0.033835	1	-0.5599	0.678349	0.175009	0.817297	-0.311074	0.806041	0.0815857	0.202444	-0.710869	0.610952	23.2785	22.9951	23.2287	23.8039	22.913	22.9371	23.2734	23.4509	22.9841	22.7716	23.3987
O09044	Synaptosomal-associated protein 23	Snap23	0.251119	1	0.201904	1.15022	0.814536	1	-0.0302463	0.979253	0.0809477	1	-0.23215	0.851365	0.462149	1	-0.191061	0.875961	0.372457	1	0.229789	1.17266	0.882914	0.942782	-0.0297534	0.979588	0.203146	1	-0.259542	0.835353	0.997335	0.998778	-0.000892003	0.999382	0.5857	0.906646	-0.0693734	0.953052	25.5369	25.6451	25.3541	25.9503	25.218	25.6203	25.259	25.722	25.2792	25.6764	25.544
Q9D823	60S ribosomal protein L37	Rpl37	0.222033	1	0.198631	1.14761	0.363213	1	-0.267357	0.83084	0.113278	1	-0.465989	0.723975	0.813906	1	-0.0937433	0.937088	0.276187	1	0.175923	1.12969	0.00948139	0.377508	-0.538229	0.688616	0.0143029	1	-0.714152	0.609563	0.390211	0.858907	-0.237411	0.848266	0.0405354	0.138375	-0.85782	0.551786	29.0405	29.3886	29.2552	29.3449	28.699	29.1335	29.38	29.1647	28.9162	28.7356	29.2843
P51175	Protoporphyrinogen oxidase	Ppox	0.291475	1	0.187367	1.13868	0.211778	1	-0.235637	0.84931	0.0482651	1	-0.423003	0.74587	0.0657184	0.765263	-0.43524	0.739571	0.654402	1	-0.0616659	0.958157	0.0458934	0.387513	-0.476512	0.718713	0.0595543	1	-0.414846	0.7501	0.0381402	0.577291	-0.457547	0.728223	0.0959739	0.389772	-0.437153	0.738591	24.6023	24.2571	24.2266	24.5311	23.8468	24.0379	24.5434	24.4013	24.255	24.3093	24.4459
Q9CQV1	Mitochondrial import inner membrane translocase subunit TIM16	Pam16	0.289168	1	0.186564	1.13805	0.202927	1	-0.296376	0.814296	0.0681731	1	-0.48294	0.715518	0.388734	1	-0.256258	0.837257	0.578931	1	0.095897	1.06873	0.00353768	0.298982	-0.538164	0.688647	0.0236539	1	-0.634061	0.64436	0.289507	0.821666	-0.337151	0.791603	0.00957956	0.135548	-0.714953	0.609225	24.8497	24.9918	25.0152	25.0724	24.8173	24.3696	24.6881	24.8786	25.2251	24.9199	24.7795
Q62086	Serum paraoxonase/arylesterase 2	Pon2	0.454821	1	0.1626	1.1193	0.747231	1	-0.055942	0.961966	0.172801	1	-0.218542	0.859434	0.0905837	0.701143	-0.530973	0.692088	0.346301	1	0.177082	1.13059	0.182115	0.660107	0.166828	1.12259	0.955529	1	-0.0102539	0.992918	0.18978	0.82755	-0.363439	0.77731	0.345647	0.747848	0.157281	1.11518	25.4582	26.1875	25.9717	26.1337	25.4421	25.6722	25.6751	26.2011	25.8856	25.9607	26.2156
Q62093	Serine/arginine-rich splicing factor 2	Srsf2	0.290683	1	0.144808	1.10558	0.54137	1	-0.0347207	0.976221	0.173371	1	-0.179528	0.882992	0.681105	1	0.0452871	1.03189	0.0791745	1	0.29996	1.23111	0.67149	0.924572	-0.029445	0.979797	0.081853	1	-0.329405	0.795864	0.123732	0.806343	0.351163	1.27559	0.840586	0.975232	-0.02353	0.983823	28.4369	28.5118	28.474	28.5013	28.5271	28.5667	28.0725	28.4508	28.0639	28.4085	28.5947
Q6P9Q6	FK506-binding protein 15	Fkbp15	0.436575	1	0.131182	1.09519	0.267331	1	-0.22309	0.856728	0.0376483	1	-0.354272	0.782264	0.0144569	0.527243	-0.531988	0.691601	0.288592	1	-0.116199	0.922615	0.178086	0.547965	-0.351994	0.7835	0.362622	1	-0.235795	0.849217	0.127811	0.809019	-0.256192	0.837295	0.893283	0.972099	0.0400019	1.02812	25.4371	24.8558	24.9233	24.7933	24.7822	24.6528	24.927	25.1428	24.8513	25.2493	25.2497
Q9Z1J3	Cysteine desulfurase, mitochondrial	Nfs1	0.225613	1	0.120104	1.08681	0.960811	1	0.00340996	1.00237	0.0888149	1	-0.116694	0.922299	0.274638	1	-0.153338	0.899167	0.125959	1	0.182018	1.13447	0.0967552	0.743444	0.0897535	1.06419	0.362906	1	-0.0922642	0.938049	0.925154	0.989107	-0.0136868	0.990558	0.29109	0.913452	0.0473874	1.03339	26.9741	27.2299	27.19	27.3111	27.1453	26.9506	27.1078	27.1845	26.8926	27.168	27.2346
Q925I1	ATPase family AAA domain-containing protein 3	Atad3	0.389336	1	0.113514	1.08186	0.818268	1	-0.0236336	0.983752	0.16715	1	-0.137148	0.909315	0.816083	1	-0.0441093	0.969888	0.446196	1	0.142146	1.10355	0.699699	0.880764	-0.0570265	0.961243	0.159777	1	-0.199173	0.87105	0.425768	0.883267	0.1508	1.11018	0.969804	0.995664	-0.00426388	0.997049	28.8396	28.9708	28.5524	28.6153	28.8409	28.6021	28.4709	28.7841	28.4571	28.6493	28.882
Q9D8T7	SRA stem-loop-interacting RNA-binding protein, mitochondrial	Slirp	0.217717	1	0.112297	1.08095	0.975031	1	0.00253611	1.00176	0.0968661	1	-0.109761	0.926742	0.244891	1	-0.218428	0.859502	0.263254	1	0.128515	1.09317	0.407057	0.791296	0.0911986	1.06525	0.278	1	-0.0373166	0.974466	0.752016	0.97757	-0.0357889	0.975498	0.0138303	0.628147	0.145322	1.10598	27.4033	27.4857	27.382	27.7087	27.4946	27.2277	27.3798	27.44	27.371	27.5669	27.5923
Q9D020	Cytosolic 5-nucleotidase 3A	Nt5c3a	0.603658	1	0.108278	1.07794	0.623233	1	-0.110804	0.926072	0.159903	1	-0.219082	0.859112	0.672715	1	-0.156353	0.89729	0.951757	1	0.0193971	1.01354	0.438679	0.679771	-0.241504	0.845863	0.12958	1	-0.260901	0.834566	0.548818	0.920175	-0.12681	0.915854	0.386785	0.698261	-0.231358	0.851833	23.3471	22.6454	23.4892	23.4487	23.1823	22.9141	23.2894	22.9281	23.3076	23.4942	22.9149
Q91VJ4	Serine/threonine-protein kinase 38	Stk38	0.607225	1	0.107943	1.07769	0.376973	1	-0.222735	0.85694	0.105862	1	-0.330677	0.795163	0.959801	1	0.0178318	1.01244	0.395029	1	0.251005	1.19004	0.400778	0.635207	-0.312012	0.805517	0.0537115	1	-0.563017	0.676885	0.182549	0.809094	0.29441	1.22638	0.426876	0.683677	-0.286439	0.819924	22.8068	23.3884	22.8463	22.4893	23.1719	22.7309	22.5963	22.7172	22.6574	22.7109	23.1563
Q9WV54	Acid ceramidase	Asah1	0.419915	1	0.0955539	1.06848	0.591975	1	-0.071766	0.951473	0.129836	1	-0.16732	0.890495	0.886594	1	0.0315151	1.02208	0.462162	1	0.103145	1.07411	0.19957	0.636383	-0.196732	0.872525	0.0333664	1	-0.299877	0.812322	0.113216	0.847293	0.187492	1.13878	0.4588	0.794046	-0.143899	0.90507	27.4149	26.9337	27.2069	27.2953	27.2341	27.2252	26.9925	27.1718	26.9621	27.0029	27.3933
Q61699	Heat shock protein 105 kDa	Hsph1	0.46414	1	0.0759135	1.05403	0.54651	1	-0.0600965	0.9592	0.055175	1	-0.13601	0.910033	0.237978	1	-0.180326	0.882503	0.676156	1	0.0671819	1.04767	0.800245	0.920771	-0.0392838	0.973138	0.286597	1	-0.106466	0.928861	0.930872	0.991077	-0.0101096	0.993017	0.51572	0.907055	0.0637512	1.04518	28.7744	29.0236	28.623	28.6202	28.5908	28.7658	28.784	28.7195	28.5618	28.7947	28.9226
O70492	Sorting nexin-3	Snx3	0.433591	1	0.0626015	1.04435	0.365308	1	-0.0661354	0.955193	0.182016	1	-0.128737	0.914632	0.789694	1	-0.0368557	0.974777	0.510609	1	0.0839615	1.05992	0.235701	0.740189	-0.10603	0.929142	0.233604	1	-0.189991	0.876611	0.757099	0.973823	0.0512273	1.03615	0.478196	0.851381	-0.101908	0.9318	27.4948	27.5318	27.457	27.506	27.5098	27.4213	27.5418	27.515	27.1862	27.3896	27.6152
P60710	Actin, cytoplasmic 1	Actb	0.50467	1	0.0610165	1.0432	0.273801	1	-0.113916	0.924077	0.0775406	1	-0.174932	0.885809	0.677129	1	0.0293388	1.02054	0.363864	1	0.124466	1.0901	0.197701	0.634109	-0.186647	0.878646	0.0437012	1	-0.311113	0.80602	0.310302	0.880944	0.130384	1.09458	0.122048	0.577365	-0.210068	0.864497	33.5117	33.3856	33.572	33.713	33.5058	33.6198	33.5846	33.3544	33.3582	33.5123	33.5546
Q8C878	NEDD8-activating enzyme E1 catalytic subunit	Uba3	0.589072	1	0.0533626	1.03768	0.343343	1	-0.141144	0.9068	0.117456	1	-0.194506	0.873872	0.758154	1	-0.0317841	0.97821	0.894631	1	0.019647	1.01371	0.131783	0.557515	-0.283341	0.821686	0.0379422	1	-0.302988	0.810572	0.389477	0.922191	-0.0938349	0.937029	0.0455631	0.381997	-0.365039	0.776448	24.9525	25.1481	25.0314	24.7239	24.7796	24.929	25.056	24.8564	24.9321	24.8356	24.9366
Q9CQG1	Putative glutathione-specific gamma-glutamylcyclotransferase 2	Chac2	0.844049	1	0.0462958	1.03261	0.267884	1	0.26194	1.19909	0.137849	1	0.215644	1.16122	0.555654	1	0.166525	1.12235	0.297174	1	0.247232	1.18693	0.0121541	0.38391	0.495623	1.40993	0.269031	1	0.24839	1.18788	0.908648	0.984493	-0.0295127	0.979751	0.80528	0.952447	0.0523526	1.03695	23.169	24.187	24.015	23.8579	23.7523	23.7342	23.9431	23.9686	23.4065	23.3395	23.8139
Q7TNE1	Succinate--hydroxymethylglutarate CoA-transferase	Sugct	0.970575	1	0.00350971	1.00244	0.25934	1	0.158197	1.11589	0.172713	1	0.154687	1.11318	0.263119	1	0.275413	1.21034	0.704466	1	-0.0446053	0.969555	0.840803	0.93363	0.0295982	1.02073	0.625622	1	0.0742035	1.05278	0.683054	0.974436	0.0476888	1.03361	0.495984	0.797069	-0.15352	0.899054	26.7733	26.6534	26.4478	26.4124	26.6312	26.5625	26.4453	26.4965	26.7056	26.1461	26.4967
P09411	Phosphoglycerate kinase 1	Pgk1	0.971346	1	0.0024868	1.00173	0.584961	1	0.0402622	1.0283	0.165978	1	0.0377754	1.02653	0.779704	1	0.0160007	1.01115	0.0595133	1	0.0801417	1.05712	0.0283203	0.6584	0.132434	1.09614	0.106393	1	0.0522919	1.03691	0.572818	0.984317	0.0152232	1.01061	0.319085	0.908933	0.0515143	1.03635	32.5843	32.8253	32.8578	32.9287	32.8375	32.7739	32.7962	32.7843	32.791	32.751	32.8284
Q63829	COMM domain-containing protein 3	Commd3	0.956431	1	-0.0082983	0.994265	0.257893	1	-0.170905	0.888285	0.165373	1	-0.162607	0.893409	0.965912	1	-0.00292778	0.997973	0.324125	1	0.182744	1.13504	0.664863	0.842002	-0.0863158	0.941925	0.150844	1	-0.269059	0.82986	0.112614	0.819094	0.260422	1.19783	0.974323	0.995978	-0.00570933	0.99605	24.0577	24.5293	24.555	24.1313	24.4414	24.5244	24.184	24.3895	24.0939	24.4415	24.5301
Q9DCU9	4-hydroxy-2-oxoglutarate aldolase, mitochondrial	Hoga1	0.927609	1	-0.0104662	0.992772	0.376106	1	0.128389	1.09307	0.158817	1	0.138855	1.10103	0.430343	1	0.183168	1.13537	0.688961	1	-0.0602868	0.959073	0.770489	0.903917	0.0490259	1.03457	0.409475	1	0.109313	1.07871	0.506532	0.949214	0.0654243	1.04639	0.967049	0.994076	-0.00843143	0.994173	29.3171	29.2476	28.9589	28.8328	29.145	29.1326	29.0493	29.2001	28.9708	28.7689	29.1424
P40336	Vacuolar protein sorting-associated protein 26A	Vps26a	0.895005	1	-0.0150634	0.989613	0.248288	1	0.118817	1.08584	0.168192	1	0.133881	1.09724	0.333932	1	0.165211	1.12133	0.719521	1	0.0575377	1.04069	0.133149	0.635188	0.170532	1.12547	0.468933	1	0.112994	1.08147	0.939165	0.989223	0.0140085	1.00976	0.769957	0.957525	-0.0382083	0.973864	25.9255	26.241	26.2883	26.0511	26.1685	26.1314	26.2154	26.3114	25.8809	26.1142	25.8552
Q9D5V5	Cullin-5	Cul5	0.93112	1	-0.0171088	0.988211	0.333339	1	0.191897	1.14226	0.135742	1	0.209006	1.15589	0.638785	1	0.0585108	1.04139	0.765129	1	-0.0873413	0.941256	0.490696	0.70738	0.221995	1.16635	0.17471	1	0.309336	1.23914	0.201854	0.821978	-0.263164	0.833259	0.954087	0.991947	-0.0123383	0.991484	24.4098	24.0737	24.9207	24.6556	24.4787	24.2696	24.6806	24.4295	24.8018	24.3374	24.2939
Q9CXF0	Kynureninase	Kynu	0.679868	1	-0.0252827	0.982628	0.289267	1	0.105553	1.07591	0.164961	1	0.130835	1.09493	0.686097	1	0.110198	1.07938	0.775864	1	-0.0275211	0.981105	0.137532	0.712077	0.117072	1.08453	0.130251	1	0.144594	1.10542	0.850966	0.983155	-0.0198075	0.986364	0.939326	0.990043	0.014588	1.01016	29.6716	29.773	29.585	29.725	29.6582	29.7459	29.644	29.8627	29.6588	29.3603	29.8234
Q9DCB8	Iron-sulfur cluster assembly 2 homolog, mitochondrial	Isca2	0.787213	1	-0.0255889	0.98242	0.353327	1	0.0975518	1.06996	0.163217	1	0.123141	1.0891	0.327372	1	0.154743	1.11322	0.836566	1	0.0294971	1.02066	0.378891	0.734778	0.13157	1.09548	0.467624	1	0.102072	1.07331	0.739124	0.974321	0.0438334	1.03085	0.954848	0.991954	-0.00883738	0.993893	24.3441	24.3557	24.6852	24.442	24.5439	24.4734	24.2879	24.5184	24.5881	24.469	24.2388
Q8BWM0	Prostaglandin E synthase 2	Ptges2	0.757749	1	-0.0275675	0.981073	0.226432	1	-0.106245	0.929003	0.0633335	1	-0.0786777	0.946925	0.342545	1	-0.10217	0.931631	0.0130299	1	-0.135103	0.910605	0.00415477	0.54766	-0.198119	0.871686	0.196294	1	-0.0630163	0.957261	0.535773	0.964682	-0.0492392	0.966446	0.816162	0.988544	-0.0100854	0.993034	26.8038	26.4533	26.4788	26.4251	26.62	26.4565	26.6387	26.5802	26.5437	26.6536	26.6273
O35465	Peptidyl-prolyl cis-trans isomerase FKBP8	Fkbp8	0.759112	1	-0.0285769	0.980387	0.310606	1	0.089615	1.06409	0.19661	1	0.118192	1.08537	0.5233	1	0.0844374	1.06027	0.920539	1	-0.0142778	0.990152	0.260527	0.71777	0.126417	1.09158	0.301578	1	0.140695	1.10244	0.595273	0.943839	0.083854	1.05985	0.259235	0.745125	0.140112	1.10199	27.0404	27.028	26.8014	27.0609	27.0192	27.1039	27.0627	27.1051	26.7653	26.8755	27.0788
Q8C1E7	Transmembrane protein 120A	Tmem120a	0.749004	1	-0.0301035	0.97935	0.226488	1	0.160509	1.11768	0.0964599	1	0.190613	1.14125	0.572349	1	0.0847149	1.06048	0.472822	1	-0.0920417	0.938194	0.413102	0.7151	0.16917	1.12441	0.17855	1	0.261211	1.19848	0.478828	0.938114	-0.0879984	0.940827	0.687517	0.907257	0.0884981	1.06326	24.9224	24.9443	24.6067	24.8953	24.9384	24.7005	24.8779	25.0036	24.8409	24.6913	24.7782
P12815	Programmed cell death protein 6	Pdcd6	0.717255	1	-0.0367753	0.974831	0.398175	1	0.0936606	1.06707	0.116966	1	0.130436	1.09462	0.126971	1	0.222183	1.1665	0.533042	1	-0.0528177	0.964052	0.889549	0.95788	0.0164534	1.01147	0.535235	1	0.0692711	1.04919	0.0715888	0.850276	0.163212	1.11978	0.943862	0.991353	0.0102994	1.00716	26.8772	26.6756	26.4696	26.5106	26.7843	26.7516	26.6258	26.6705	26.518	26.4596	26.632
P62309	Small nuclear ribonucleoprotein G	Snrpg	0.843856	1	-0.0374183	0.974397	0.244628	1	0.230064	1.17289	0.135377	1	0.267482	1.20371	0.290868	1	0.239622	1.18068	0.887402	1	-0.0300465	0.979389	0.192389	0.583347	0.256009	1.19417	0.193795	1	0.286055	1.2193	0.235195	0.826331	0.30535	1.23572	0.132132	0.442263	0.351783	1.27614	26.5965	26.3789	26.0904	25.943	26.5543	26.3913	26.0005	26.4722	26.0297	26.0857	26.3806
Q8VBV7	COP9 signalosome complex subunit 8	Cops8	0.755218	1	-0.0380647	0.973961	0.219061	1	0.122946	1.08896	0.159885	1	0.161011	1.11807	0.0490379	0.983445	0.255589	1.19382	0.257749	1	0.139216	1.10131	0.0738101	0.56251	0.237175	1.17868	0.446911	1	0.0979589	1.07026	0.078443	0.813644	0.295861	1.22762	0.292472	0.761473	0.138232	1.10056	24.8625	25.0474	25.0285	25.219	25.2744	25.2355	25.1304	24.894	24.8529	24.9439	25.0548
Q8BH58	TIP41-like protein	Tiprl	0.78946	1	-0.0386086	0.973593	0.244745	1	0.193615	1.14363	0.17694	1	0.232224	1.17464	0.78208	1	0.0608149	1.04305	0.579892	1	0.0936565	1.06707	0.0125501	0.392571	0.440152	1.35675	0.0941602	1	0.346496	1.27147	0.535386	0.900899	0.158495	1.11612	0.0239347	0.224477	0.444176	1.36054	24.3592	24.5129	24.7519	24.6394	24.885	24.5141	24.411	24.3922	24.8199	24.5867	24.6908
Q9D6Y9	1,4-alpha-glucan-branching enzyme	Gbe1	0.775081	1	-0.0391018	0.973261	0.418855	1	0.119963	1.08671	0.0595833	1	0.159065	1.11656	0.199365	1	0.242843	1.18332	0.238508	1	0.143378	1.10449	0.124511	0.565079	0.246591	1.1864	0.291069	1	0.103213	1.07416	0.0397886	0.850356	0.154377	1.11294	0.922033	0.990271	0.0147476	1.01027	30.6333	31.2369	30.9195	31.1923	31.0977	31.1567	30.9149	31.0135	30.9901	30.7593	31.0095
Q9R1P4	Proteasome subunit alpha type-1	Psma1	0.551015	1	-0.0415344	0.971621	0.321719	1	0.0783043	1.05578	0.185862	1	0.119839	1.08661	0.557868	1	0.109404	1.07878	0.91708	1	0.0106455	1.00741	0.0633908	0.668038	0.137441	1.09995	0.284135	1	0.126795	1.09187	0.492423	0.936292	0.0924206	1.06616	0.463609	0.833995	0.109812	1.07909	30.0189	30.1214	30.0256	30.0922	30.1666	30.1564	29.9156	30.233	30.0588	29.8953	30.209
Q91YR1	Twinfilin-1	Twf1	0.662758	1	-0.0419056	0.971371	0.22308	1	0.0881981	1.06304	0.111065	1	0.130104	1.09437	0.0859365	1	0.160986	1.11805	0.729428	1	-0.0526091	0.964191	0.582206	0.863843	0.0569064	1.04023	0.440499	1	0.109516	1.07887	0.807179	0.977232	0.0404228	1.02842	0.89303	0.989585	-0.0110477	0.992372	27.3121	27.3488	27.0728	27.1922	27.2805	27.3148	27.302	27.4339	27.0357	27.0891	27.1841
Q9CQ60	6-phosphogluconolactonase	Pgls	0.570213	1	-0.0436213	0.970217	0.556626	1	0.0553014	1.03908	0.151402	1	0.0989227	1.07097	0.199849	1	0.182075	1.13451	0.827038	1	0.0163434	1.01139	0.408961	0.840622	0.0598316	1.04234	0.572634	1	0.0434882	1.0306	0.833483	0.984122	-0.0161486	0.988869	0.193399	0.708207	-0.154735	0.898297	28.5809	28.9336	28.7812	28.825	28.795	28.8332	28.9176	28.84	28.7331	28.5374	28.7266
P62192	26S proteasome regulatory subunit 4	Psmc1	0.497768	1	-0.0453094	0.969082	0.237433	1	0.0786987	1.05607	0.133545	1	0.124008	1.08976	0.393497	1	0.125951	1.09123	0.817006	1	0.0152308	1.01061	0.0184368	0.63295	0.137944	1.10034	0.107441	1	0.122713	1.08878	0.151864	0.854497	0.16227	1.11905	0.137449	0.675862	0.159033	1.11654	29.0036	29.0126	28.9302	29.0157	29.1958	29.0706	28.9391	29.0779	28.8958	28.9087	29.1058
P34022	Ran-specific GTPase-activating protein	Ranbp1	0.437907	1	-0.0459517	0.968651	0.465869	1	0.0402166	1.02827	0.0261145	1	0.0861683	1.06155	0.0947457	1	0.0829248	1.05916	0.454728	1	-0.0609296	0.958646	0.692774	0.928212	0.027401	1.01917	0.130195	1	0.0883306	1.06314	0.466548	0.963214	0.0452855	1.03189	0.216967	0.906642	0.0506913	1.03576	27.4823	27.4508	27.3588	27.2403	27.47	27.4424	27.3646	27.3745	27.4935	27.3494	27.3971
Q99J47	Dehydrogenase/reductase SDR family member 7B	Dhrs7b	0.686339	1	-0.0492543	0.966436	0.355494	1	0.127447	1.09236	0.174107	1	0.176702	1.1303	0.455633	1	0.259913	1.19741	0.829258	1	-0.0372028	0.974543	0.554744	0.828337	0.0840244	1.05997	0.362677	1	0.121227	1.08766	0.86732	0.98392	-0.0326878	0.977597	0.430006	0.76732	-0.171374	0.887997	24.7777	24.7604	24.7542	25.1199	24.729	25.0364	24.7478	25.1153	24.883	24.3849	24.8606
O88544	COP9 signalosome complex subunit 4	Cops4	0.317091	1	-0.049749	0.966104	0.416092	1	0.051178	1.03611	0.086746	1	0.100927	1.07246	0.0333791	1	0.0837078	1.05974	0.889484	1	0.00798798	1.00555	0.174804	0.714069	0.120394	1.08703	0.17835	1	0.112406	1.08103	0.15276	0.912193	0.0855881	1.06112	0.237834	0.779985	0.114287	1.08244	27.4484	27.4911	27.6253	27.5107	27.6319	27.608	27.4727	27.5904	27.5402	27.5261	27.5464
Q9CZD3	Glycine--tRNA ligase	Gars1	0.51443	1	-0.0522242	0.964448	0.289405	1	0.0707167	1.05024	0.11918	1	0.122941	1.08895	0.812229	1	-0.026371	0.981887	0.406363	1	-0.0837657	0.943592	0.144058	0.679437	0.138716	1.10093	0.0584901	1	0.222482	1.16674	0.341604	0.886877	-0.127001	0.915733	0.169182	0.753888	0.121852	1.08813	26.8668	26.8651	27.0581	26.9083	26.8078	26.9933	27.1654	26.9584	26.959	26.8968	26.9572
Q9CZ44	NSFL1 cofactor p47	Nsfl1c	0.473632	1	-0.0552508	0.962427	0.469119	1	0.0573716	1.04057	0.0609463	1	0.112622	1.08119	0.300564	1	0.0604696	1.04281	0.592192	1	0.0333023	1.02335	0.00860729	0.562349	0.180693	1.13343	0.0806061	1	0.147391	1.10756	0.562653	0.964058	0.0500326	1.03529	0.0485431	0.678735	0.136954	1.09958	27.9311	28.242	28.1895	28.1842	28.2653	28.1786	28.0728	28.2597	28.1833	28.1672	28.1557
Q64520	Guanylate kinase	Guk1	0.663215	1	-0.0555496	0.962228	0.602549	1	0.068396	1.04855	0.176624	1	0.123946	1.08971	0.436551	1	0.0777531	1.05537	0.892084	1	0.0228055	1.01593	0.336632	0.685988	0.177546	1.13096	0.335294	1	0.154741	1.11322	0.994353	0.999838	-0.00102202	0.999292	0.622019	0.906036	0.0759656	1.05407	24.9596	25.1018	25.5182	25.204	25.316	25.1857	25.2148	25.4335	25.1074	25.1256	25.2206
Q8C5W0	Calmin	Clmn	0.647727	1	-0.0571156	0.961184	0.413323	1	0.11875	1.08579	0.179755	1	0.175866	1.12964	0.408148	1	0.177697	1.13108	0.756871	1	-0.0574245	0.960978	0.610928	0.807144	0.11722	1.08464	0.419499	1	0.174644	1.12869	0.911516	0.984612	-0.0210094	0.985543	0.920225	0.982552	-0.0240622	0.98346	24.5323	24.679	24.292	24.7231	24.7451	24.4571	24.8232	24.58	24.4631	24.331	24.5158
Q8BWW4	La-related protein 4	Larp4	0.807907	1	-0.057276	0.961077	0.273627	1	0.191332	1.14182	0.159186	1	0.248608	1.18806	0.338053	1	0.177898	1.13123	0.920124	1	0.0266349	1.01863	0.0302662	0.392542	0.322383	1.25039	0.321474	1	0.295748	1.22752	0.578019	0.888915	-0.208086	0.865685	0.492823	0.869564	-0.0902357	0.939369	24.3065	24.8948	24.9981	25.0323	24.5995	24.8812	25.2822	25.0947	24.4684	24.5413	24.5835
Q99N92	39S ribosomal protein L27, mitochondrial	Mrpl27	0.641127	1	-0.057627	0.960843	0.373565	1	0.162567	1.11928	0.188515	1	0.220194	1.16489	0.376609	1	0.334745	1.26115	0.750011	1	-0.0629635	0.957296	0.712881	0.858986	0.0808627	1.05765	0.522999	1	0.143826	1.10483	0.955505	0.992087	0.0108658	1.00756	0.585388	0.811147	-0.180053	0.88267	23.678	23.7879	23.3811	23.7488	23.6343	23.7918	23.8995	23.7537	23.4535	23.0921	23.6646
P11862	Growth arrest-specific protein 2	Gas2	0.66809	1	-0.0604116	0.95899	0.33984	1	0.187003	1.1384	0.181056	1	0.247414	1.18708	0.130672	0.974304	0.344772	1.26995	0.433379	1	-0.124386	0.917394	0.769108	0.893633	0.0581226	1.04111	0.339259	1	0.182509	1.13486	0.104941	0.834385	-0.298621	0.813029	0.107456	0.390604	-0.460884	0.726541	24.4654	24.6395	24.5169	24.9056	24.6054	24.4209	24.9303	24.6463	24.8586	24.0649	24.2718
Q8VBZ3	Cleft lip and palate transmembrane protein 1 homolog	Clptm1	0.621325	1	-0.0614509	0.9583	0.476537	1	0.0834329	1.05954	0.154618	1	0.144884	1.10564	0.24786	1	0.125674	1.09102	0.967371	1	-0.00519753	0.996404	0.207391	0.679613	0.152493	1.11149	0.357212	1	0.15769	1.1155	0.544449	0.933385	-0.105309	0.929606	0.621318	0.907144	-0.0732927	0.950466	25.3444	25.7287	25.6948	25.7901	25.6881	25.5874	25.7536	25.9387	25.5369	25.4527	25.5715
P31786	Acyl-CoA-binding protein	Dbi	0.474601	1	-0.0642744	0.956426	0.522112	1	0.0721033	1.05125	0.0936783	1	0.136378	1.09914	0.379868	1	0.187941	1.13914	0.901863	1	-0.0150566	0.989618	0.493474	0.811397	0.0869459	1.06212	0.257611	1	0.102002	1.07326	0.928882	0.992022	-0.00696119	0.995186	0.562806	0.879071	-0.0928993	0.937637	33.276	33.6229	33.2869	33.5422	33.4676	33.5166	33.5099	33.5863	33.401	33.1379	33.4705
P97429	Annexin A4	Anxa4	0.620323	1	-0.0675684	0.954245	0.207576	1	0.13013	1.09439	0.142158	1	0.197699	1.14687	0.18031	1	0.290443	1.22302	0.688677	1	0.0276763	1.01937	0.0761219	0.631879	0.163545	1.12004	0.0889945	1	0.135869	1.09875	0.036867	0.748683	0.378139	1.29966	0.0698618	0.495517	0.223564	1.16761	29.1257	28.8664	28.8367	29.0018	29.3757	29.1285	28.8014	28.9364	28.8841	28.8887	29.0346
O35226	26S proteasome non-ATPase regulatory subunit 4	Psmd4	0.390141	1	-0.0690801	0.953246	0.504964	1	0.0494491	1.03487	0.178498	1	0.118529	1.08563	0.421263	1	0.147897	1.10795	0.987028	1	0.00172106	1.00119	0.202562	0.739991	0.100672	1.07227	0.372366	1	0.0989507	1.07099	0.357198	0.887026	0.128528	1.09318	0.552589	0.886524	0.0795819	1.05671	28.0869	28.072	28.1906	28.231	28.2426	28.34	28.3043	28.1806	28.0034	28.0043	28.2825
Q91XD6	Vacuolar protein-sorting-associated protein 36	Vps36	0.495427	1	-0.0695088	0.952962	0.466767	1	0.108716	1.07827	0.172554	1	0.178225	1.13149	0.948273	1	-0.00967216	0.993318	0.703132	1	-0.0526765	0.964146	0.15038	0.574	0.250813	1.18988	0.0314929	1	0.303489	1.23413	0.538342	0.937248	0.0823453	1.05874	0.0293024	0.31801	0.395507	1.3154	25.3432	25.3259	25.455	25.0553	25.2817	25.5458	25.2332	25.3528	25.4083	25.4261	25.4208
P35293	Ras-related protein Rab-18	Rab18	0.465846	1	-0.0697236	0.952821	0.31854	1	0.0645915	1.04579	0.162607	1	0.134315	1.09757	0.440531	1	0.128955	1.0935	0.754079	1	-0.0477384	0.967452	0.185976	0.752649	0.0901502	1.06448	0.366222	1	0.137889	1.10029	0.812128	0.977962	0.0451851	1.03182	0.631864	0.928591	0.0541188	1.03822	27.8282	27.9095	27.7446	27.8774	27.8975	27.976	27.9018	28.1167	27.6562	27.6786	27.9371
Q9D273	Corrinoid adenosyltransferase	Mmab	0.518825	1	-0.0739169	0.950055	0.484051	1	0.12071	1.08727	0.198431	1	0.194627	1.14443	0.0828852	1	0.0874882	1.06252	0.834309	1	-0.0269756	0.981476	0.236363	0.612058	0.239077	1.18024	0.116939	1	0.266052	1.20251	0.0171705	0.815008	0.238509	1.17977	0.0869457	0.390187	0.417073	1.33522	25.9083	25.6805	25.9278	25.5349	25.9712	25.9886	25.8107	25.6791	25.7343	25.867	25.9178
P47753	F-actin-capping protein subunit alpha-1	Capza1	0.463717	1	-0.0747448	0.94951	0.343172	1	0.137198	1.09977	0.0661112	1	0.211943	1.15825	0.479155	1	0.101879	1.07317	0.138203	1	-0.110123	0.926509	0.120235	0.632699	0.175196	1.12912	0.0145352	1	0.285319	1.21868	0.0715147	0.859189	0.133596	1.09702	0.0709847	0.431707	0.317036	1.24577	26.9739	26.7338	26.5523	26.5698	26.8018	26.9229	26.7521	26.7024	26.7317	26.6591	26.8618
Q7TNV0	Protein DEK	Dek	0.418756	1	-0.0748552	0.949437	0.372661	1	0.0782335	1.05572	0.0722511	1	0.153089	1.11195	0.0194314	1	0.144152	1.10508	0.382329	1	-0.0778389	0.947476	0.228497	0.779018	0.0812079	1.0579	0.140496	1	0.159047	1.11655	0.200945	0.855231	0.155014	1.11343	0.0692897	0.617304	0.169909	1.12499	26.4958	26.2905	26.1796	26.2374	26.4489	26.4885	26.1896	26.4411	26.3103	26.3197	26.3294
P99026	Proteasome subunit beta type-4	Psmb4	0.253103	1	-0.076311	0.94848	0.42864	1	0.0440602	1.03101	0.0377281	1	0.120371	1.08701	0.181123	1	0.157276	1.11518	0.896907	1	-0.0107829	0.992554	0.169729	0.761314	0.0849851	1.06068	0.230796	1	0.095768	1.06863	0.425394	0.941981	0.0757004	1.05387	0.842043	0.986407	0.0141923	1.00989	28.1717	28.3715	28.2238	28.3429	28.3997	28.3987	28.1967	28.3757	28.3982	28.164	28.3199
Q99JW4	LIM and senescent cell antigen-like-containing domain protein 1	Lims1	0.487628	1	-0.0766427	0.948262	0.490714	1	0.0798411	1.0569	0.149517	1	0.156484	1.11457	0.491808	1	0.124526	1.09015	0.454658	1	-0.0777957	0.947504	0.293025	0.753665	0.0999934	1.07177	0.121946	1	0.177789	1.13115	0.240143	0.858145	0.174312	1.12843	0.128138	0.543428	0.227575	1.17087	27.0376	26.8742	26.7119	26.6761	26.9051	27.1073	26.722	26.8072	26.9664	26.9914	26.7719
Q8K4Z5	Splicing factor 3A subunit 1	Sf3a1	0.380467	1	-0.0828396	0.944197	0.323259	1	0.133569	1.097	0.109662	1	0.216409	1.16184	0.209324	1	0.133852	1.09722	0.856775	1	-0.0129592	0.991058	0.0240771	0.460422	0.258487	1.19622	0.00196205	1	0.271446	1.20702	0.00144388	0.785817	0.259514	1.19708	0.0106326	0.213681	0.397109	1.31687	26.4922	26.4864	26.2963	26.2867	26.6326	26.6253	26.3364	26.3761	26.3959	26.4219	26.5683
Q7TQI3	Ubiquitin thioesterase OTUB1	Otub1	0.321727	1	-0.0858492	0.94223	0.766333	1	0.0287157	1.0201	0.192591	1	0.114565	1.08265	0.27143	1	0.204638	1.1524	0.838513	1	-0.0216548	0.985102	0.69084	0.917031	0.0328611	1.02304	0.64147	1	0.0545158	1.03851	0.903876	0.987699	0.0151262	1.01054	0.371574	0.779602	-0.134996	0.910672	27.3468	27.5189	27.6676	27.5517	27.6319	27.6004	27.7598	27.5905	27.4528	27.2764	27.5466
Q3TEA8	Heterochromatin protein 1-binding protein 3	Hp1bp3	0.486808	1	-0.0869485	0.941512	0.619899	1	0.0702285	1.04988	0.177452	1	0.157177	1.1151	0.371176	1	0.0951452	1.06817	0.142081	1	-0.102261	0.931572	0.0152235	0.7174	0.0962702	1.06901	0.0214567	1	0.198531	1.14753	0.0452132	0.82319	0.228255	1.17142	0.0134612	0.345537	0.331641	1.25844	26.3437	25.9472	25.9241	25.8803	26.2639	26.2315	26.1243	25.9619	25.9722	26.071	26.2342
Q9DCG9	Multifunctional methyltransferase subunit TRM112-like protein	Trmt112	0.470295	1	-0.0892343	0.940022	0.300567	1	0.129032	1.09356	0.139101	1	0.218267	1.16334	0.597547	1	0.179587	1.13256	0.55244	1	-0.116819	0.922219	0.183714	0.704935	0.127234	1.0922	0.233695	1	0.244053	1.18432	0.985028	0.998065	-0.00454489	0.996855	0.800413	0.947288	0.0599206	1.04241	25.2992	25.2429	25.278	25.0675	25.2393	25.3775	25.6112	25.0292	25.2983	24.8483	25.4093
Q91YP3	Deoxyribose-phosphate aldolase	Dera	0.501737	1	-0.089751	0.939685	0.235337	1	0.146715	1.10705	0.151449	1	0.236466	1.1781	0.133876	0.761591	0.561995	1.47631	0.672442	1	0.0579713	1.041	0.46413	0.818063	0.0774186	1.05513	0.908667	1	0.0194473	1.01357	0.148809	0.835122	0.338497	1.26444	0.386688	0.721513	-0.20405	0.86811	27.4973	27.5455	27.5408	27.5535	27.9087	27.7455	27.7039	27.4985	27.2635	27.0508	27.4795
Q9JHI5	Isovaleryl-CoA dehydrogenase, mitochondrial	Ivd	0.453927	1	-0.0919339	0.938264	0.85916	1	0.0187949	1.01311	0.195565	1	0.110729	1.07977	0.144856	1	0.136904	1.09954	0.445504	1	-0.0903797	0.939276	0.975085	0.992306	0.00289917	1.00201	0.254815	1	0.0932789	1.06679	0.111461	0.82332	0.210364	1.15698	0.0185474	0.576414	0.166739	1.12252	31.3684	30.9539	31.2061	30.9543	31.3919	31.2857	31.0651	31.0596	31.2607	31.2269	31.1769
Q9DB26	Phytanoyl-CoA dioxygenase domain-containing protein 1	Phyhd1	0.300264	1	-0.0930123	0.937563	0.676421	1	0.0397773	1.02796	0.169831	1	0.13279	1.09641	0.441692	1	0.208097	1.15516	0.35172	1	-0.0988204	0.933796	0.752351	0.949637	-0.0162354	0.98881	0.391267	1	0.082585	1.05891	0.423625	0.913797	0.110663	1.07972	0.930466	0.988441	-0.0148487	0.98976	27.6001	27.3843	27.3341	27.481	27.6798	27.5388	27.5833	27.5806	27.3319	27.1942	27.6082
O88543	COP9 signalosome complex subunit 3	Cops3	0.27779	1	-0.0991074	0.93361	0.728405	1	0.0379795	1.02667	0.16716	1	0.137087	1.09968	0.268715	1	0.140965	1.10264	0.577875	1	-0.0640965	0.956544	0.674653	0.859157	0.0704047	1.05001	0.433405	1	0.134501	1.09771	0.837452	0.982307	-0.0263208	0.981921	0.863681	0.97092	-0.0327851	0.977531	25.9807	26.0506	26.308	26.1299	26.1077	26.2935	26.3292	26.2678	26.0838	26.0621	26.0572
Q8CIM7	Cytochrome P450 2D26	Cyp2d26	0.347829	1	-0.0992896	0.933493	0.586549	1	0.0655004	1.04645	0.191665	1	0.16479	1.121	0.490977	1	0.233104	1.17536	0.4909	1	-0.0964578	0.935327	0.726498	0.933714	0.0227896	1.01592	0.385613	1	0.119247	1.08617	0.452239	0.899869	0.132705	1.09635	0.934411	0.988918	0.0188487	1.01315	32.0757	31.9629	31.8691	31.792	32.0667	32.141	32.0484	32.1244	31.7406	31.5945	32.147
Q9JMD3	START domain-containing protein 10	Stard10	0.351265	1	-0.100763	0.93254	0.539367	1	0.0773206	1.05506	0.173947	1	0.178083	1.13138	0.249874	1	0.305273	1.23565	0.775714	1	-0.0452722	0.969107	0.715142	0.895518	0.0480181	1.03384	0.610289	1	0.0932903	1.0668	0.876425	0.981752	0.0294161	1.0206	0.415206	0.746313	-0.182567	0.881134	30.6722	30.9561	30.8548	30.7304	30.8898	30.9538	30.8937	31.1228	30.6606	30.4289	30.8041
Q9CPQ3	Mitochondrial import receptor subunit TOM22 homolog	Tomm22	0.3488	1	-0.102129	0.931657	0.779292	1	-0.030289	0.979224	0.117412	1	0.0718399	1.05106	0.71386	1	0.0411053	1.0289	0.19705	1	-0.190544	0.876275	0.443891	0.78449	-0.0982145	0.934188	0.117336	1	0.0923297	1.06609	0.614937	0.977837	-0.0321442	0.977966	0.814352	0.97775	0.0190802	1.01331	25.9292	25.5494	25.8532	25.4782	25.7894	25.7812	25.8374	25.8826	25.7325	25.647	25.8415
Q99LI2	Chloride channel CLIC-like protein 1	Clcc1	0.232142	1	-0.107763	0.928026	0.583686	1	0.0625456	1.04431	0.151698	1	0.170308	1.1253	0.329592	1	0.100312	1.07201	0.384879	1	-0.067421	0.954343	0.152348	0.672125	0.149551	1.10922	0.0771551	1	0.216972	1.16229	0.108655	0.837348	0.199912	1.14863	0.0483885	0.408684	0.316572	1.24537	25.5466	25.4714	25.335	25.358	25.5845	25.7264	25.3565	25.5459	25.4643	25.5215	25.5888
O70152	Dolichol-phosphate mannosyltransferase subunit 1	Dpm1	0.571889	1	-0.108574	0.927504	0.556322	1	0.097555	1.06996	0.178215	1	0.206129	1.15359	0.286007	1	0.273678	1.20889	0.914936	1	-0.0299632	0.979445	0.502965	0.755191	0.131133	1.09515	0.505109	1	0.161097	1.11814	0.90867	0.98309	-0.0335379	0.977021	0.450464	0.788887	-0.146119	0.903678	24.5292	24.589	24.9634	25.1395	24.9264	24.8611	25.1255	25.1439	24.5124	24.4331	24.807
Q8R016	Bleomycin hydrolase	Blmh	0.213033	1	-0.116947	0.922137	0.592325	1	-0.0523304	0.964377	0.161134	1	0.0646164	1.04581	0.532341	1	0.086442	1.06175	0.674658	1	-0.0299244	0.979472	0.767918	0.942464	0.0201416	1.01406	0.222791	1	0.050066	1.03531	0.879306	0.99267	0.00698948	1.00486	0.758767	0.965811	-0.0293865	0.979837	27.3483	27.5852	27.6773	27.7932	27.6915	27.7528	27.7583	27.7233	27.6638	27.5243	27.7471
Q8R0F9	SEC14-like protein 4	Sec14l4	0.220179	1	-0.117972	0.921482	0.669308	1	0.0362363	1.02544	0.107957	1	0.154209	1.11281	0.286664	1	0.259143	1.19677	0.942925	1	0.00660578	1.00459	0.0868061	0.739707	0.0908585	1.065	0.356637	1	0.0842527	1.06014	0.17746	0.846706	0.184847	1.1367	0.94526	0.992074	0.00995636	1.00693	30.0074	30.161	30.189	30.2801	30.3524	30.4241	30.1903	30.3461	30.0738	29.9527	30.3055
O08997	Copper transport protein ATOX1	Atox1	0.2273	1	-0.122211	0.918779	0.556819	1	0.039188	1.02754	0.116844	1	0.161399	1.11837	0.280166	1	0.241327	1.18208	0.614776	1	-0.071298	0.951781	0.0983844	0.879922	0.036815	1.02585	0.455307	1	0.108113	1.07782	0.813495	0.978328	0.0463451	1.03265	0.47183	0.86933	-0.0868692	0.941564	29.2913	29.4097	29.4085	29.4443	29.4525	29.6245	29.5111	29.7078	29.2575	29.1568	29.4375
Q9JMH6	Thioredoxin reductase 1, cytoplasmic	Txnrd1	0.272409	1	-0.122243	0.918758	0.819556	1	0.0239706	1.01675	0.11337	1	0.146214	1.10666	0.287333	1	0.208013	1.1551	0.670791	1	0.0355104	1.02492	0.076988	0.667944	0.140525	1.10231	0.306828	1	0.105014	1.0755	0.153114	0.846965	0.178517	1.13172	0.595454	0.901348	0.0755183	1.05374	28.5066	28.8	28.8637	28.8922	28.9992	28.9908	28.7666	28.9595	28.7233	28.6422	28.9317
Q7TT50	Serine/threonine-protein kinase MRCK beta	Cdc42bpb	0.32417	1	-0.122397	0.91866	0.327685	1	0.299262	1.23052	0.150749	1	0.421659	1.33947	0.317916	0.977103	0.893733	1.85798	0.989404	1	-0.00145276	0.998994	0.460642	0.775658	0.105491	1.07586	0.476263	1	0.106944	1.07694	0.0533335	0.824972	0.336839	1.26299	0.453329	0.641713	-0.44995	0.732068	26.1709	26.2474	26.0622	26.0377	26.5059	26.4023	25.9609	26.2112	26.1796	24.8848	26.2359
Q9D1M4	Eukaryotic translation elongation factor 1 epsilon-1	Eef1e1	0.345862	1	-0.123937	0.91768	0.524469	1	0.0860009	1.06142	0.166596	1	0.209938	1.15664	0.455978	1	0.261287	1.19855	0.675574	1	-0.0765667	0.948312	0.400882	0.773769	0.0991383	1.07113	0.336155	1	0.175705	1.12952	0.374289	0.855262	0.19905	1.14794	0.652085	0.882551	0.113468	1.08183	26.2993	26.2421	26.2661	26.0028	26.4653	26.4266	25.9892	26.5006	26.2509	25.9004	26.469
P61924	Coatomer subunit zeta-1	Copz1	0.23692	1	-0.124771	0.91715	0.897281	1	0.00976152	1.00679	0.130587	1	0.134533	1.09774	0.398267	1	0.0960264	1.06883	0.241377	1	-0.186908	0.878486	0.803907	0.93197	-0.0267048	0.98166	0.2172	1	0.160203	1.11744	0.330891	0.866459	-0.156168	0.897406	0.329733	0.834037	-0.0919911	0.938227	27.0255	27.2079	26.9166	26.9559	27.1049	27.0102	27.3297	27.2987	27.0128	26.8848	27.0382
Q9JLJ2	4-trimethylaminobutyraldehyde dehydrogenase	Aldh9a1	0.381043	1	-0.127789	0.915233	0.457462	1	0.0995108	1.07141	0.189274	1	0.2273	1.17064	0.309584	1	0.317041	1.24577	0.739783	1	0.0233084	1.01629	0.0272186	0.567415	0.190781	1.14138	0.0769858	1	0.167472	1.12309	0.0104597	0.44942	0.455676	1.37143	0.189099	0.489991	0.306107	1.23637	31.8381	31.7609	31.6455	31.7339	32.1916	32.1	31.6217	31.7999	31.6488	31.5984	32.0591
Q8VE47	Ubiquitin-like modifier-activating enzyme 5	Uba5	0.294019	1	-0.128823	0.914578	0.433119	1	0.0806616	1.0575	0.117968	1	0.209484	1.15627	0.152362	1	0.288419	1.2213	0.711491	1	-0.066302	0.955083	0.476953	0.806509	0.090559	1.06478	0.477663	1	0.156861	1.11486	0.875559	0.982974	0.0368656	1.02588	0.61817	0.886191	-0.0946922	0.936472	25.3552	25.5523	25.5821	25.5045	25.6967	25.6022	25.8043	25.7502	25.2833	25.2424	25.4796
Q8JZR0	Long-chain-fatty-acid--CoA ligase 5	Acsl5	0.351441	1	-0.132395	0.912316	0.318028	1	0.121493	1.08786	0.107859	1	0.253887	1.19242	0.243923	1	0.323735	1.25157	0.780002	1	-0.0381648	0.973893	0.0732953	0.623013	0.169157	1.1244	0.183854	1	0.207322	1.15454	0.107242	0.802339	0.351604	1.27598	0.239285	0.615385	0.235191	1.17706	30.8662	30.7553	30.6944	30.592	31.0425	31.0982	30.6161	30.9551	30.585	30.5504	30.9428
Q6P6M5	Peroxisomal membrane protein 11C	Pex11g	0.442738	1	-0.133118	0.911858	0.596366	1	0.141755	1.10325	0.185798	1	0.274873	1.20989	0.635683	1	0.0588923	1.04167	0.942128	1	-0.0144272	0.99005	0.289041	0.563979	0.404433	1.32357	0.244772	1	0.41886	1.33687	0.828293	0.983178	-0.030495	0.979084	0.453656	0.678989	0.329473	1.25655	24.4525	24.7062	25.2537	24.9682	24.9421	24.9778	24.8126	25.1562	25.0026	25.006	24.7962
Q9Z1Q5	Chloride intracellular channel protein 1	Clic1	0.251547	1	-0.134416	0.911038	0.934148	1	0.0101972	1.00709	0.0711929	1	0.144613	1.10543	0.570756	1	0.0556641	1.03934	0.0519599	1	-0.22559	0.855245	0.804716	0.942594	-0.021677	0.985087	0.0705004	1	0.203913	1.15182	0.71637	0.977629	0.0343672	1.02411	0.133112	0.634031	0.182616	1.13494	27.0272	26.5591	26.7218	26.5415	26.9209	26.814	26.9497	26.7912	26.7584	26.7486	26.875
P61458	Pterin-4-alpha-carbinolamine dehydratase	Pcbd1	0.238635	1	-0.14294	0.905672	0.423034	1	0.101161	1.07264	0.117365	1	0.244101	1.18435	0.204889	1	0.256063	1.19422	0.861337	1	0.0176175	1.01229	0.0646668	0.549355	0.253743	1.1923	0.160455	1	0.236125	1.17783	0.0775062	0.807751	0.323277	1.25117	0.162163	0.478796	0.303338	1.234	29.7876	29.8963	29.9286	29.9129	30.1994	30.2371	29.891	30.0599	29.7339	29.8254	30.099
Q8BMP6	Golgi resident protein GCP60	Acbd3	0.369069	1	-0.150852	0.900718	0.604942	1	0.0851043	1.06076	0.0801175	1	0.235956	1.17769	0.12478	1	0.288785	1.22161	0.700202	1	-0.0902799	0.93934	0.660503	0.82784	0.110457	1.07957	0.276963	1	0.200737	1.14929	0.176386	0.82097	0.242436	1.18299	0.442444	0.780173	0.154388	1.11295	24.725	24.9244	24.5666	24.2472	24.8339	24.9903	24.7376	24.4791	24.7923	24.5419	24.7047
Q9DCD6	Gamma-aminobutyric acid receptor-associated protein	Gabarap	0.260837	1	-0.157498	0.896578	0.518063	1	0.100697	1.07229	0.162357	1	0.258195	1.19598	0.480627	1	0.352201	1.27651	0.789882	1	-0.0438811	0.970042	0.148129	0.669794	0.151643	1.11083	0.313604	1	0.195524	1.14514	0.433798	0.860483	0.206499	1.15388	0.877882	0.966665	0.0498219	1.03514	26.1761	26.3579	26.2461	26.2965	26.7131	26.388	26.2147	26.6443	26.1731	25.8222	26.5745
P21278	Guanine nucleotide-binding protein subunit alpha-11	Gna11	0.43817	1	-0.159528	0.895318	0.831565	1	0.0430836	1.03031	0.155804	1	0.202611	1.15078	0.962545	1	0.0125103	1.00871	0.385561	1	-0.260642	0.834716	0.793893	0.892381	0.0687027	1.04877	0.086947	1	0.329345	1.25644	0.871073	0.983541	-0.0374966	0.974344	0.151834	0.487729	0.279338	1.21364	25.4022	25.3533	25.2276	24.5922	25.1008	25.4609	25.4781	25.4105	25.0664	25.1157	25.421
O54909	Retinol dehydrogenase 16	Rdh16	0.463214	1	-0.161307	0.894215	0.429494	1	0.143917	1.1049	0.199758	1	0.305224	1.23561	0.10038	0.814031	0.437542	1.35429	0.696087	1	0.02996	1.02098	0.147585	0.5734	0.246972	1.18671	0.192973	1	0.217012	1.16232	0.00719877	0.313	0.674458	1.596	0.0909352	0.379933	0.453928	1.36976	28.1128	27.8217	27.8699	27.7046	28.3385	28.548	27.7788	27.8531	27.6745	27.8981	28.1133
Q8C0Z1	Protein FAM234A	Fam234a	0.319338	1	-0.16192	0.893834	0.57186	1	0.0893407	1.06388	0.156959	1	0.251261	1.19025	0.866968	1	-0.0355768	0.975642	0.144932	1	-0.32648	0.79748	0.607211	0.806921	0.116006	1.08373	0.114013	1	0.442486	1.35894	0.173839	0.826662	-0.333063	0.793849	0.608349	0.844762	0.145	1.10573	24.5976	24.6166	24.5618	24.2386	24.5505	24.3809	25.0705	24.6355	24.6904	24.3342	24.6684
Q9CQX2	Cytochrome b5 type B	Cyb5b	0.272482	1	-0.163257	0.893007	0.480971	1	0.105116	1.07558	0.0618663	1	0.268373	1.20445	0.448072	1	0.251721	1.19063	0.43448	1	-0.104804	0.929931	0.169263	0.640438	0.17467	1.12871	0.133464	1	0.279474	1.21375	0.560238	0.92631	-0.122238	0.918762	0.676255	0.898526	-0.0944853	0.936606	29.9183	30.3057	30.4293	30.3079	30.1744	30.4861	30.6285	30.4889	30.2399	30.2977	29.8593
O88455	7-dehydrocholesterol reductase	Dhcr7	0.540707	1	-0.166444	0.891036	0.446589	1	0.167115	1.12281	0.199111	1	0.333559	1.26012	0.156774	0.981646	0.375591	1.29737	0.70549	1	-0.134788	0.910804	0.491926	0.733111	0.17075	1.12564	0.441494	1	0.305538	1.23588	0.396984	0.846931	0.392254	1.31244	0.313602	0.584757	0.3222	1.25024	27.3271	26.9062	26.9979	26.5744	27.2888	27.4176	27.0766	27.4236	26.3826	26.821	27.1342
P21126	Ubiquitin-like protein 4A	Ubl4a	0.328589	1	-0.169266	0.889295	0.804578	1	0.0319388	1.02239	0.164878	1	0.201205	1.14966	0.501251	1	0.155884	1.1141	0.302246	1	-0.277139	0.825226	0.74651	0.904122	-0.0457198	0.968806	0.33172	1	0.231419	1.17399	0.761214	0.961444	-0.0870085	0.941473	0.94705	0.991784	-0.011473	0.992079	23.9265	23.764	23.7421	23.3966	23.7937	23.855	23.5114	24.0654	24.1574	23.4794	23.8576
Q8C1A5	Thimet oligopeptidase	Thop1	0.302434	1	-0.177624	0.884158	0.939812	1	-0.0129639	0.991054	0.0194867	1	0.16466	1.1209	0.359048	1	0.190142	1.14088	0.876814	1	-0.0313193	0.978525	0.570995	0.796379	0.116353	1.08399	0.00721311	1	0.147672	1.10778	0.284779	0.942346	0.0705179	1.05009	0.820738	0.969905	0.0280482	1.01963	24.2531	24.4868	25.0966	24.5931	24.7678	24.8869	24.8052	24.7307	24.7347	24.7868	24.4876
Q8BZ09	Mitochondrial 2-oxodicarboxylate carrier	Slc25a21	0.318438	1	-0.178185	0.883814	0.61877	1	0.112406	1.08103	0.193481	1	0.29059	1.22314	0.420589	1	0.329111	1.25624	0.277209	1	-0.224814	0.855705	0.889666	0.937736	0.0400956	1.02818	0.445254	1	0.26491	1.20156	0.607397	0.922537	0.148827	1.10867	0.843734	0.947464	0.0846259	1.06041	25.812	25.5078	25.3474	25.3068	25.5682	25.9538	25.8058	25.7531	25.2775	25.1673	25.6964
Q9QZN4	F-box only protein 6	Fbxo6	0.21619	1	-0.182965	0.880891	0.797252	1	0.0340627	1.02389	0.0883277	1	0.217028	1.16234	0.0263537	1	0.193507	1.14354	0.319848	1	-0.180923	0.882138	0.75119	0.897169	0.0517845	1.03655	0.237804	1	0.232708	1.17504	0.297378	0.852695	-0.20025	0.8704	0.358602	0.748216	-0.161049	0.894375	24.7558	24.9186	25.268	25.0664	25.055	25.075	25.3878	25.389	25.0189	24.902	24.8411
Q9CYV5	Transmembrane protein 135	Tmem135	0.247191	1	-0.18957	0.876867	0.662466	1	0.0838573	1.05985	0.147494	1	0.273428	1.20868	0.400863	1	0.477193	1.39203	0.543081	1	-0.0574341	0.960972	0.486278	0.8185	0.08015	1.05713	0.300384	1	0.137584	1.10006	0.792838	0.974163	0.0671619	1.04765	0.407786	0.680339	-0.272447	0.827914	24.8705	25.361	25.1942	25.3195	25.1268	25.7055	25.4303	25.4081	25.2085	24.5931	25.2848
Q9D8W5	26S proteasome non-ATPase regulatory subunit 12	Psmd12	0.206322	1	-0.190917	0.876049	0.684946	1	0.0314578	1.02204	0.112941	1	0.222374	1.16665	0.720655	1	0.109049	1.07852	0.148306	1	-0.241852	0.845659	0.472252	0.851993	0.0560722	1.03963	0.0923514	1	0.297925	1.22937	0.410249	0.858701	-0.224314	0.856002	0.786171	0.960947	-0.0354379	0.975736	27.4462	27.679	27.6172	27.5078	27.3908	27.847	27.9666	27.9711	27.5919	27.6448	27.3748
Q9Z210	Peroxisomal membrane protein 11B	Pex11b	0.225225	1	-0.191115	0.875928	0.409923	1	0.118141	1.08534	0.0857107	1	0.309256	1.23907	0.338469	1	0.450623	1.36663	0.0466582	1	-0.171865	0.887695	0.739242	0.90613	0.0431474	1.03036	0.152387	1	0.215012	1.16071	0.730406	0.955767	-0.100891	0.932457	0.128616	0.450944	-0.336501	0.79196	24.1424	24.4406	24.4005	24.3014	24.1022	24.8014	24.581	24.6108	24.4664	23.9104	24.092
Q8C3X8	Lipase maturation factor 2	Lmf2	0.2227	1	-0.209708	0.864712	0.234227	1	0.146035	1.10652	0.0126551	1	0.355744	1.27965	0.0245527	0.708	0.371914	1.29407	0.305182	1	-0.272925	0.82764	0.666094	0.856183	0.0720387	1.0512	0.159565	1	0.344964	1.27012	0.984017	0.999045	0.00533708	1.00371	0.828258	0.977354	-0.0216131	0.985131	28.0065	27.9942	27.7226	27.5184	28.0827	27.9639	27.6981	28.0101	28.3457	27.6507	27.6521
Q71KT5	Delta(14)-sterol reductase TM7SF2	Tm7sf2	0.304968	1	-0.210858	0.864023	0.320054	1	0.221446	1.1659	0.0826066	1	0.432304	1.34939	0.308236	1	0.670577	1.59171	0.561543	1	-0.102695	0.931292	0.303881	0.683375	0.17076	1.12565	0.183571	1	0.273455	1.2087	0.0973312	0.770439	0.481023	1.39573	0.839047	0.946813	0.0839011	1.05988	26.5707	26.4159	26.1943	26.0909	26.6699	26.9649	26.2819	26.5858	26.1415	25.6743	26.6193
P03958	Adenosine deaminase	Ada	0.649531	1	-0.2137	0.862323	0.675432	1	0.190201	1.14092	0.0385028	1	0.403901	1.32308	0.17742	0.912488	0.428197	1.34555	0.424923	1	-0.429038	0.742757	0.931982	0.951203	-0.0413342	0.971756	0.0817621	1	0.387704	1.30831	0.236625	0.811101	0.359436	1.28292	0.0606959	0.421189	0.318942	1.24742	25.4798	24.5395	24.4543	23.1363	24.6745	24.9891	24.8032	24.3003	24.3137	24.2656	24.5417
Q8K5C8	Cis-retinol/androgen dehydrogenase type 3	Rdh9	0.450098	1	-0.223989	0.856195	0.568777	1	0.113635	1.08195	0.183926	1	0.337624	1.26367	0.53268	1	0.17877	1.13192	0.38034	1	-0.376628	0.770236	0.694693	0.868908	0.066899	1.04746	0.311239	1	0.443527	1.35993	0.998549	0.998792	-0.000968933	0.999329	0.253971	0.590654	0.263788	1.20063	25.8954	25.2471	25.4953	25.1169	25.4821	25.8421	26.1299	25.9175	24.9417	25.3258	25.6407
Q9ERB0	Synaptosomal-associated protein 29	Snap29	0.289397	1	-0.238962	0.847355	0.666787	1	0.102384	1.07355	0.0945575	1	0.341346	1.26694	0.444939	1	0.171723	1.1264	0.958208	1	-0.0137583	0.990509	0.0842128	0.394235	0.440669	1.35723	0.0892265	1	0.454428	1.37024	0.459463	0.867394	0.203745	1.15168	0.0658888	0.320544	0.48645	1.40099	24.8243	25.6986	25.1163	25.3823	25.5353	25.6979	25.3269	25.7593	25.1523	25.2821	25.6076
Q9D125	28S ribosomal protein S25, mitochondrial	Mrps25	0.268179	1	-0.248269	0.841906	0.661586	1	0.0541553	1.03825	0.0940861	1	0.302425	1.23322	0.173558	0.979204	0.393054	1.31317	0.623445	1	-0.161301	0.894218	0.665364	0.846308	0.0807037	1.05753	0.412734	1	0.242005	1.18264	0.81844	0.972612	0.0900908	1.06444	0.532021	0.908426	-0.0609582	0.958627	25.9994	25.9425	26.1691	26.4979	26.6398	26.2694	26.4499	25.8822	26.7613	26.0221	26.1009
Q9QYF1	Retinol dehydrogenase 11	Rdh11	0.250575	1	-0.27354	0.827287	0.626745	1	0.0923723	1.06612	0.142072	1	0.365912	1.2887	0.112499	0.810777	0.458908	1.3745	0.608965	1	-0.101338	0.932168	0.294243	0.659727	0.202576	1.15075	0.211965	1	0.303914	1.23449	0.0663293	0.500634	0.612493	1.5289	0.102681	0.387033	0.457499	1.37316	28.2614	28.1569	27.9355	27.8183	28.5669	28.8012	28.1533	28.2871	27.7743	28.104	28.3463
Q9JIM1	Equilibrative nucleoside transporter 1	Slc29a1	0.254376	1	-0.301108	0.811629	0.809558	1	0.0520115	1.03671	0.0969831	1	0.35312	1.27732	0.0926213	0.883348	0.349723	1.27432	0.467902	1	-0.266249	0.831478	0.753272	0.863207	0.0891349	1.06373	0.25072	1	0.355384	1.27933	0.371469	0.850198	0.325636	1.25322	0.140618	0.460485	0.331297	1.25814	25.5343	25.2821	25.4793	24.6969	25.8337	25.6555	25.5053	25.776	24.9757	25.3229	25.4669
P21958	Antigen peptide transporter 1	Tap1	0.381821	1	-0.318674	0.801807	0.470955	1	0.380411	1.30171	0.167588	1	0.699085	1.62347	0.398798	1	0.487471	1.40198	0.381102	1	-0.219247	0.859014	0.342531	0.558311	0.620914	1.53785	0.195481	1	0.840161	1.79025	0.127122	0.617624	0.734797	1.66416	0.21513	0.372688	1.08749	2.12504	24.7154	24.0901	24.2037	23.5185	24.4364	25.3465	24.1094	24.2924	24.0682	24.4569	24.351
Q8QZR1	Tyrosine aminotransferase	Tat	0.364833	1	-0.325296	0.798134	0.983963	1	-0.00706148	0.995117	0.159893	1	0.318235	1.2468	0.414493	1	0.38169	1.30287	0.827988	1	-0.0490742	0.966556	0.441107	0.685392	0.226858	1.17028	0.388823	1	0.275932	1.21078	0.748343	0.954899	-0.115524	0.923047	0.54492	0.776889	-0.221283	0.857802	25.5147	26.8877	26.9756	26.5499	27.0703	26.4056	27.0971	26.93	26.5334	26.1854	26.5272
P48410	ATP-binding cassette sub-family D member 1	Abcd1	0.311625	1	-0.386986	0.764725	0.750321	1	0.0693804	1.04927	0.182452	1	0.456367	1.37208	0.0695862	0.553356	1.05846	2.08271	0.317636	1	0.184729	1.1366	0.423941	0.675671	0.239701	1.18075	0.833678	1	0.0549717	1.03884	0.0197506	0.309679	1.0846	2.12079	0.806539	0.93955	0.0811173	1.05784	22.3313	23.1258	22.8783	22.6443	24.0674	23.498	22.5382	22.7389	22.8172	22.6475	22.801
O88833;A2A8T1	Cytochrome P450 4A10;Cytochrome P450, family 4, subfamily a, polypeptide 32	Cyp4a10;Cyp4a32	0.297265	1	2.36792	5.16196	0.124596	1	0.892424	1.85629	0.457183	1	-1.47549	0.35961	0.701077	1	0.24549	1.1855	0.266431	1	3.71949	13.1728	0.10161	0.383322	1.09667	2.13861	0.419369	1	-2.62282	0.16235	0.369344	0.800084	3.91366	15.0705	0.255851	0.396354	1.04535	2.06387	27.2703	26.1378	26.3407	26.7656	26.5295	26.6882	17	24.8403	26.2453	25.8149	26.9118
Q99J56	Derlin-1	Derl1	0.374947	1	1.83947	3.57879	0.179158	1	0.22465	1.16849	0.372942	1	-1.61482	0.326505	0.303342	1	0.317409	1.24609	0.350839	1	2.98493	7.91689	0.687262	0.851095	0.0819556	1.05845	0.362009	1	-2.90298	0.133695	0.476014	0.819955	2.96308	7.79789	0.142414	0.505289	-0.257303	0.836651	25.786	25.979	25.5099	25.3918	25.7891	25.421	25.2782	25.6478	17	25.1479	25.4275
Q9QY36	N-alpha-acetyltransferase 10	Naa10	0.311588	1	1.78259	3.44043	0.168759	1	0.161279	1.11828	0.293365	1	-1.62131	0.32504	0.346738	1	-0.217676	0.859949	0.288629	1	2.88832	7.4041	0.00578446	0.391988	0.331258	1.25811	0.33998	1	-2.55707	0.169921	0.460931	0.812687	2.57398	5.95452	0.0587755	0.475054	0.234593	1.17657	24.2888	24.6776	24.5113	24.5911	24.4375	24.1205	23.6876	24.4274	17	24.4147	24.5786
Q8VDW0	ATP-dependent RNA helicase DDX39A	Ddx39a	0.332948	1	1.77586	3.42443	0.0260402	1	0.710057	1.63587	0.501692	1	-1.06581	0.477705	0.966564	1	0.0163136	1.01137	0.326954	1	2.82587	7.09044	0.00793406	0.259571	1.03865	2.05431	0.519603	1	-1.78722	0.28973	0.520555	0.837738	2.36978	5.16862	0.180321	0.401347	0.566244	1.48066	24.4735	24.7546	24.7511	25.14	24.3166	24.535	24.4651	24.703	17	24.0825	24.7366
Q6PAM1	Alpha-taxilin	Txlna	0.310033	1	1.70266	3.255	0.199909	1	0.346543	1.27151	0.355977	1	-1.35611	0.390633	0.708786	1	-0.247713	0.84223	0.303162	1	2.70021	6.49897	0.00564955	0.27373	0.605161	1.52115	0.411861	1	-2.09505	0.23406	0.503322	0.826415	2.24314	4.73428	0.408671	0.620323	0.395809	1.31568	23.8024	24.2565	24.2294	24.1249	23.9845	23.5086	17	24.446	23.0642	23.4704	24.5182
Q80XI3	Eukaryotic translation initiation factor 4 gamma 3	Eif4g3	0.330521	1	1.63441	3.10461	0.00600821	1	0.428123	1.34548	0.407351	1	-1.20629	0.433382	0.44044	1	-3.24306	0.105619	0.2053	1	0.266471	1.20286	0.0474993	0.391462	0.41803	1.3361	0.458845	1	0.151559	1.11077	0.260774	0.649766	-3.50766	0.0879201	0.550979	0.857033	-0.113039	0.924638	24.0282	24.351	24.0215	24.1335	17	23.7891	23.6498	23.8963	24.1605	23.5204	23.7548
Q8VDT9	39S ribosomal protein L50, mitochondrial	Mrpl50	0.386077	1	1.48153	2.79245	0.0286003	1	0.198	1.14711	0.390835	1	-1.28353	0.410789	0.817515	1	-0.0383568	0.973763	0.388126	1	2.32491	5.01035	0.110796	0.586471	0.211267	1.1577	0.429161	1	-2.11364	0.231063	0.547475	0.849786	2.09817	4.28165	0.885973	0.978273	0.0228799	1.01599	24.1097	24.1558	24.1352	24.0875	24.0157	23.7832	24.0109	17	24.393	24.0263	23.8493
Q9EPJ9	ADP-ribosylation factor GTPase-activating protein 1	Arfgap1	0.376737	1	1.40546	2.64903	0.198071	1	0.302036	1.23288	0.427119	1	-1.10343	0.46541	0.456969	1	-2.89683	0.134266	0.813482	1	0.115964	1.0837	0.310878	0.662323	0.208142	1.1552	0.841223	1	0.0921777	1.06598	0.258201	0.644815	-3.34885	0.098151	0.327644	0.576259	-0.359843	0.779249	23.4065	23.7604	23.7931	23.2666	17	23.2838	23.8462	23.9865	22.6395	22.6368	23.4406
Q9CPW3	39S ribosomal protein L54, mitochondrial	Mrpl54	0.403857	1	1.36506	2.57587	0.185409	1	0.336213	1.26244	0.469154	1	-1.02885	0.490102	0.583514	1	0.218233	1.16331	0.381752	1	2.16461	4.48344	0.0399345	0.420886	0.304373	1.23488	0.445903	1	-1.86023	0.275432	0.453193	0.809908	2.44492	5.44496	0.230701	0.4842	0.366456	1.28918	24.2504	23.5577	23.3581	23.6943	23.7262	23.9078	17	24.0221	23.0942	23.2744	23.9232
Q8CCF0	U4/U6 small nuclear ribonucleoprotein Prp31	Prpf31	0.41404	1	1.34472	2.53981	0.110101	1	0.443294	1.35971	0.527741	1	-0.901426	0.535357	0.262882	1	0.356024	1.27989	0.382041	1	2.16748	4.49239	0.0682402	0.38997	0.427757	1.34514	0.475512	1	-1.73973	0.299426	0.441506	0.814993	2.52054	5.73797	0.192988	0.447326	0.424789	1.34238	24.3155	23.6659	23.6682	23.3869	23.944	23.9095	23.3819	23.8366	17	23.3406	23.8008
Q921W4	Quinone oxidoreductase-like protein 1	Cryzl1	0.481221	1	1.08977	2.1284	0.068003	1	-0.273189	0.827488	0.323802	1	-1.36296	0.388783	0.419687	1	-3.18274	0.110128	0.0868049	1	-0.250529	0.840588	0.0201395	0.386761	-0.400304	0.757699	0.33096	1	-0.149775	0.901391	0.250303	0.632248	-3.34576	0.0983615	0.179849	0.483794	-0.312797	0.80508	23.2565	23.3122	23.288	23.1455	17	23.3066	23.6467	23.5368	23.3137	23.1578	23.5142
Q5SX39	Myosin-4	Myh4	0.30161	1	4.80151	27.8868	0.403413	1	3.72564	13.229	0.788764	1	-1.07588	0.474383	0.168106	0.551059	-10.2418	0.000825873	0.510616	1	4.01714	16.1912	0.0881478	0.249878	9.05187	530.744	0.3108	1	5.03474	32.7798	0.294488	0.762126	-6.7855	0.00906484	0.121733	0.135516	8.49103	359.794	21.1714	21.6175	34.2442	30.8104	19.1761	17	20.4125	21.1464	33.0618	33.0367	23.623
A0A571BF58	SH3 domain-containing protein	Neb	0.234861	1	3.99683	15.9648	0.473114	1	2.20136	4.59912	0.518093	1	-1.79547	0.288078	0.356859	0.877171	-5.53009	0.021641	0.521947	1	3.36991	10.3382	0.298123	0.393233	4.06419	16.728	0.851651	1	0.694281	1.61808	0.649899	0.860308	-2.25372	0.209682	0.336933	0.401469	3.97065	15.6778	27.9086	22.2983	32.6554	32.0668	24.231	22.5355	23.54	21.0113	32.3595	33.4913	24.3353
P07310	Creatine kinase M-type	Ckm	0.463784	1	3.87026	14.624	0.638322	1	2.47703	5.56748	0.766921	1	-1.39324	0.38071	0.147209	0.519034	-9.49798	0.001383	0.403993	1	6.26473	76.8901	0.0662994	0.250788	10.2747	1238.74	0.517317	1	4.00993	16.1105	0.895805	0.973811	-1.06458	0.478112	0.0173635	0.184052	12.4433	5569.5	18.6443	22.2051	34.3288	33.2426	25.7818	19.4106	17	19.4274	34.5549	34.6958	29.4926
P70335	Rho-associated protein kinase 1	Rock1	0.229176	1	3.80881	14.0142	0.454003	1	1.85011	3.60528	0.564956	1	-1.9587	0.25726	0.433015	1	-5.16518	0.0278693	0.431732	1	2.99273	7.9598	0.395174	0.524062	3.17168	9.01097	0.971852	1	0.178951	1.13206	0.814121	0.942607	-1.51981	0.348731	0.438493	0.469643	3.82432	14.1656	27.6501	26.8627	26.3613	27.2286	27.6099	17	26.923	17	27.5513	27.3562	27.5841
Q62234	Myomesin-1	Myom1	0.333927	1	3.72332	13.2079	0.687227	1	1.34414	2.53879	0.497093	1	-2.37918	0.192218	0.403823	0.975077	-5.03491	0.0305028	0.435827	1	4.7869	27.6058	0.315218	0.395313	4.17821	18.1036	0.910171	1	-0.608693	0.655791	0.997533	0.999886	0.0203412	1.0142	0.380802	0.438405	4.44656	21.8046	22.2038	20.4434	30.1104	28.723	22.9152	20.4028	17	17	30.9161	31.3209	22.067
P09542	Myosin light chain 3	Myl3	0.453776	1	3.61243	12.2307	0.741974	1	1.62692	3.08853	0.644588	1	-1.98551	0.252523	0.0436816	0.693926	-11.9816	0.000247273	0.573816	1	3.88087	14.7319	0.116487	0.279862	8.55942	377.26	0.373901	1	4.67855	25.6084	0.495025	0.823012	-4.67855	0.0390496	0.00842664	0.225172	11.9816	4044.11	17	17	30.2312	29.447	17	17	17	17	31.0356	31.5714	26.3918
P13541	Myosin-3	Myh3	0.40768	1	3.61201	12.2271	0.696333	1	1.75201	3.36827	0.619107	1	-1.86	0.275476	0.0265459	0.840381	-10.669	0.000614222	0.519232	1	4.01349	16.1503	0.117161	0.287527	8.02612	260.677	0.373901	1	4.01263	16.1407	0.495025	0.826057	-4.01263	0.0619552	0.00397561	0.254833	10.669	1628.08	17	17	29.6563	28.4221	17	17	17	17	29.0379	29.4427	25.8952
P23927	Alpha-crystallin B chain	Cryab	0.370167	1	3.53346	11.5792	0.571638	1	2.21078	4.62924	0.723849	1	-1.32268	0.399791	0.176318	0.524718	-8.70704	0.00239287	0.507565	1	3.6809	12.8251	0.101389	0.282333	7.28113	155.538	0.463916	1	3.60022	12.1276	0.565113	0.848617	-3.60917	0.0819468	0.0839667	0.137682	8.6981	415.325	20.3671	20.816	30.1494	29.2292	21.8829	17	17	21.278	30.8739	31.6133	24.6837
O09165	Calsequestrin-1	Casq1	0.43941	1	3.42254	10.7223	0.610229	1	2.23149	4.69617	0.749045	1	-1.19105	0.437983	0.120867	0.5325	-9.32378	0.0015605	0.55693	1	3.71723	13.1522	0.116384	0.285319	7.94799	246.936	0.373901	1	4.23076	18.7753	0.495025	0.823105	-4.23076	0.0532615	0.0394801	0.150019	9.32378	640.82	17	17	29.2311	28.6128	17	17	17	17	29.6923	29.8978	22.7498
Q9JKS4	LIM domain-binding protein 3	Ldb3	0.449937	1	3.40446	10.5888	0.754815	1	1.45347	2.73867	0.629714	1	-1.95099	0.258639	0.0370035	0.720615	-11.4107	0.000367322	0.569316	1	3.66819	12.7127	0.116375	0.283955	8.02365	260.232	0.373901	1	4.35546	20.4703	0.495025	0.8245	-4.35546	0.0488513	0.00655955	0.237407	11.4107	2722.41	17	17	29.3424	28.7286	17	17	17	17	30.0664	30.6688	26.1525
Q00898	Alpha-1-antitrypsin 1-5	Serpina1e	0.310453	1	3.4017	10.5685	0.511844	1	1.79218	3.46338	0.657204	1	-1.60952	0.327707	0.42265	1	-3.41348	0.093851	0.621148	1	-0.287114	0.81954	0.0710014	0.386702	-0.693996	0.618139	0.532219	1	-0.406883	0.754251	0.000535051	0.638571	-10.9271	0.000513603	0.0539701	0.134543	-7.92046	0.00412767	24.9119	27.7011	27.7436	27.4751	17	17	27.5943	27.2211	28.9657	23.827	17
P43023	Cytochrome c oxidase subunit 6A2, mitochondrial	Cox6a2	0.454335	1	3.17997	9.0629	0.753587	1	1.37021	2.58508	0.634627	1	-1.80977	0.285237	0.0333928	0.780667	-10.7152	0.000594824	0.574475	1	3.41452	10.6628	0.116314	0.288298	7.54174	186.333	0.373901	1	4.12722	17.475	0.495025	0.82449	-4.12722	0.0572245	0.00561837	0.243765	10.7152	1681.17	17	17	28.5645	28.0607	17	17	17	17	29.3817	29.724	25.7065
A2AAJ9	Obscurin	Obscn	0.380745	1	3.09445	8.54125	0.615608	1	1.72834	3.31347	0.683851	1	-1.36611	0.387937	0.304131	0.764424	-7.34249	0.00616155	0.545813	1	3.06195	8.351	0.104355	0.271549	5.6801	51.272	0.527624	1	2.61815	6.13963	0.550067	0.848835	-3.38899	0.0954577	0.181751	0.169303	6.57165	95.1181	19.8899	19.9182	28.8545	26.7743	17	20.4627	17	19.8631	29.4979	31.1447	21.003
Q1XH17	Tripartite motif-containing protein 72	Trim72	0.447225	1	3.02554	8.1429	0.665308	1	1.66807	3.17788	0.682418	1	-1.35748	0.390264	0.154417	0.526581	-8.22183	0.00334952	0.566128	1	3.26689	9.62572	0.146788	0.376515	6.48565	89.614	0.453969	1	3.21876	9.30985	0.495025	0.825267	-3.83582	0.0700333	0.075759	0.132821	7.60477	194.654	17	17	27.9842	27.3239	17	17	17	17	28.5074	28.8922	21.5515
P56655	Cytochrome P450 2C38	Cyp2c38	0.205437	1	2.90659	7.49845	0.366379	1	1.60858	3.04952	0.594884	1	-1.29801	0.406686	0.501858	1	-3.09771	0.116814	0.406673	1	2.30063	4.92672	0.433336	0.558717	2.20241	4.60249	0.979192	1	-0.0982151	0.934188	0.800728	0.939396	-1.17508	0.442859	0.617188	0.711994	1.82441	3.54163	24.7988	24.3105	23.9675	24.4873	17	24.5588	17	24.5803	24.2831	24.3805	23.3737
D3Z6P0	Protein disulfide-isomerase A2	Pdia2	0.292352	1	2.75342	6.74312	0.661384	1	1.32944	2.51305	0.346594	1	-1.42398	0.372683	NaN	1	0	1	0.373901	1	3.67122	12.7394	0.78132	0.807286	1.29792	2.45875	0.373901	1	-2.3733	0.193004	NaN	1	0	1	0.495025	0.559515	-2.3733	0.193004	17	17	28.0137	17	17	17	17	17	17	17	17
O88346	Troponin T, slow skeletal muscle	Tnnt1	0.471185	1	2.74761	6.71603	0.746285	1	1.27556	2.42092	0.672388	1	-1.47205	0.36047	0.0922125	0.571282	-9.32765	0.00155632	0.594135	1	2.91047	7.51865	0.116403	0.288871	6.67549	102.217	0.373901	1	3.76502	13.5951	0.495025	0.82577	-3.76502	0.0735559	0.0261405	0.173011	9.32765	642.543	17	17	27.2819	26.7446	17	17	17	17	28.295	29.3751	23.2802
Q9CQ52	Chymotrypsin-like elastase family member 3B	Cela3b	0.293247	1	2.74513	6.7045	0.58727	1	1.50656	2.84132	0.293246	1	-1.23857	0.423793	0.42265	1	0.960935	1.94657	0.302693	1	4.17267	18.0343	0.719963	0.748403	1.46777	2.76594	0.134339	1	-2.7049	0.153371	0.272228	0.820391	0.960935	1.94657	0.242694	0.32083	-2.7049	0.153371	17	18.3263	28.1917	17	17	18.9219	17	17	17	17	17
O88492	Perilipin-4	Plin4	0.433146	1	2.6543	6.2954	0.763774	1	1.06488	2.09199	0.600811	1	-1.58942	0.332305	0.42265	1	-5.06292	0.0299165	0.549516	1	2.89752	7.45146	0.410405	0.531764	3.62377	12.3272	0.866582	1	0.726246	1.65433	0.495025	0.823611	-3.2077	0.10824	0.638072	0.723947	2.58146	5.98546	17	17	25.6244	26.6913	17	17	17	17	26.6231	27.1258	17
P19123	Troponin C, slow skeletal and cardiac muscles	Tnnc1	0.456324	1	2.57181	5.94553	0.74777	1	1.15265	2.22322	0.650353	1	-1.41915	0.373932	0.0721905	0.628364	-8.58814	0.00259845	0.576806	1	2.75704	6.76008	0.1162	0.295738	6.11721	69.4166	0.373901	1	3.36017	10.2686	0.495025	0.823234	-3.36017	0.0973842	0.018024	0.17995	8.58814	384.846	17	17	26.3084	26.0432	17	17	17	17	27.0805	28.0299	23.1464
Q9R0Y5	Adenylate kinase isoenzyme 1	Ak1	0.574707	1	2.52452	5.7538	0.785427	1	1.24674	2.37305	0.75021	1	-1.27777	0.412432	0.123718	0.509077	-9.73193	0.00117597	0.639857	1	3.05735	8.32444	0.140672	0.366033	7.41568	170.743	0.394074	1	4.35833	20.5111	0.582018	0.852248	-3.6459	0.0798866	0.0322335	0.156735	10.4444	1393.36	17	17	28.2034	29.691	19.5231	17	17	17.7587	30.9636	31.5606	24.4264
P11404	Fatty acid-binding protein, heart	Fabp3	0.611088	1	2.48222	5.58755	0.798389	1	1.25798	2.3916	0.773487	1	-1.22424	0.428023	0.133283	0.500296	-9.26678	0.00162338	0.577199	1	3.97097	15.6813	0.143623	0.370339	8.10843	275.982	0.445848	1	4.13746	17.5994	0.805599	0.938978	-1.7891	0.289352	0.00857456	0.2202	11.6151	3136.93	17	17	30.3646	30.0882	23.115	17	17	17	31.5399	31.5317	27.1169
Q7TQH0	Ataxin-2-like protein	Atxn2l	0.221016	1	2.46776	5.53184	0.460317	1	1.16548	2.24309	0.549554	1	-1.30227	0.405486	0.392027	0.975723	-3.47077	0.0901972	0.432009	1	1.95541	3.87827	0.384817	0.522347	2.09881	4.28354	0.965345	1	0.143392	1.1045	0.764133	0.926777	-1.23107	0.426001	0.453552	0.491818	2.3831	5.21655	23.4711	23.6427	23.2676	23.264	23.4099	17	23.1538	17	24.1542	23.6892	23.6622
Q8CBW3	Abl interactor 1	Abi1	0.24064	1	2.26744	4.81468	0.394186	1	1.24762	2.3745	0.619142	1	-1.01982	0.493179	0.163286	0.927181	0.426528	1.344	0.127036	1	4.05501	16.6218	0.369381	0.486411	2.07096	4.20166	0.536778	1	-1.98405	0.25278	0.21619	0.51321	4.25981	19.1572	0.534683	0.616947	1.84924	3.6031	22.8296	23.0614	23.1455	23.2857	23.5664	23.1716	17	23.3276	17	22.945	22.94
Q8VCK7	Syncollin	Sycn	0.292352	1	2.10764	4.30985	0.644628	1	1.05984	2.0847	0.346594	1	-1.0478	0.483705	NaN	1	0	1	0.373901	1	2.81018	7.01374	0.763901	0.794503	1.06385	2.09051	0.373901	1	-1.74633	0.298059	NaN	1	0	1	0.495025	0.577257	-1.74633	0.298059	17	17	25.4306	17	17	17	17	17	17	17	17
Q9QZ47	Troponin T, fast skeletal muscle	Tnnt3	0.668681	1	2.10379	4.29836	0.843717	1	0.989038	1.98486	0.785054	1	-1.11475	0.461772	0.106041	0.55219	-9.22907	0.00166637	0.643962	1	3.34163	10.1375	0.187588	0.382017	7.63643	198.973	0.428065	1	4.2948	19.6275	0.687122	0.879492	-2.74866	0.148789	0.0278563	0.169124	10.7752	1752.52	17	17	31.9007	30.147	21.1462	19.3717	17	19.598	32.4248	32.6369	26.3391
Q8K0C5	Zymogen granule membrane protein 16	Zg16	0.292352	1	2.09683	4.27769	0.595443	1	1.17704	2.26112	0.346594	1	-0.919792	0.528585	NaN	1	0	1	0.373901	1	2.79577	6.94404	0.712288	0.742696	1.26279	2.39959	0.373901	1	-1.53299	0.345561	NaN	1	0	1	0.495025	0.57772	-1.53299	0.345561	17	17	25.3873	17	17	17	17	17	17	17	17
P35821	Tyrosine-protein phosphatase non-receptor type 1	Ptpn1	0.365271	1	1.89469	3.71843	0.624937	1	0.970399	1.95938	0.635125	1	-0.924295	0.526938	0.985772	1	-0.0809956	0.945405	0.531331	1	1.75048	3.36471	0.919061	0.928411	0.263988	1.20079	0.5791	1	-1.4865	0.356878	0.776262	0.935842	0.979421	1.97167	0.897212	0.952567	-0.426079	0.744282	22.7202	22.5493	22.1795	17	17	22.6104	17	22.4773	17	17	22.7724
Q14BI5	Myomesin 2	Myom2	0.446934	1	3.0437	8.24604	0.814482	1	0.797729	1.73836	0.486567	1	-2.24597	0.210812	0.273606	0.701898	-7.6641	0.00493032	0.64176	1	2.54527	5.83718	0.313731	0.394444	3.91139	15.0468	0.737491	1	1.36612	2.57776	0.365802	0.811619	-5.28358	0.0256734	0.390186	0.443631	3.74664	13.423	19.6411	19.3607	29.7042	29.2385	19.5446	17	23.5743	17	30.0933	30.9035	20.9692
P01867	Ig gamma-2B chain C region	Igh-3	0.33769	1	2.88841	7.40452	0.763172	1	-0.333117	0.79382	0.242458	1	-3.22152	0.107207	0.431721	1	-1.44042	0.36846	0.315544	1	4.36879	20.6602	0.965297	0.967057	-0.0401408	0.97256	0.3169	1	-4.40893	0.047074	0.3746	0.799037	5.09852	34.2617	0.2297	0.316729	2.13002	4.37722	27.3902	25.5799	25.6097	24.2726	26.3695	25.3981	17	17	28.3558	28.7167	25.9317
A0A571BEN1	Myosin-binding protein C, slow-type	Mybpc1	0.600531	1	2.68935	6.45024	0.930779	1	0.447416	1.3636	0.613805	1	-2.24194	0.211402	0.0362529	0.74944	-13.188	0.000107155	0.754574	1	2.14703	4.42915	0.234131	0.382315	7.20247	147.286	0.358536	1	5.05544	33.2537	0.293302	0.759695	-7.19388	0.00683007	0.0463044	0.140386	11.0496	2119.59	17	17	31.5171	30.5056	17	17	23.4501	17	32.1315	32.7698	27.6063
Q8VCL2	Protein SCO2 homolog, mitochondrial	Sco2	0.353155	1	2.43189	5.39599	0.879727	1	-0.343123	0.788333	0.239912	1	-2.77501	0.146096	0.43737	1	-3.39932	0.0947768	0.501644	1	2.37756	5.19656	0.995692	0.996192	0.0187556	1.01309	0.504284	1	-2.3588	0.194953	0.764859	0.926938	1.28148	2.43088	0.492662	0.555415	2.322	5.00025	23.891	23.989	17	23.8808	24.0544	17	23.7372	17	17	23.7447	24.1084
Q8K182	Complement component C8 alpha chain	C8a	0.33433	1	2.41852	5.34623	0.422981	1	0.734661	1.66401	0.458227	1	-1.68386	0.311249	0.210478	0.587385	-4.64382	0.040001	0.401736	1	-0.33441	0.793108	0.871201	0.929991	-0.0449638	0.969314	0.442685	1	0.289447	1.22217	0.0261496	0.416488	-7.67262	0.0049013	0.0168425	0.161684	-2.73935	0.149752	25.5278	27.1504	26.7645	26.4619	21.9081	17	27.0798	27.6613	26.6389	24.8	23.3957
Q5EBG6	Heat shock protein beta-6	Hspb6	0.556568	1	2.32997	5.02794	0.871611	1	0.643882	1.56253	0.631723	1	-1.68609	0.310769	0.10377	0.554537	-8.72939	0.00235608	0.619468	1	2.89927	7.4605	0.183906	0.381841	5.90873	60.0763	0.515684	1	3.00945	8.05259	0.615896	0.860587	-2.94263	0.130071	0.0458223	0.136786	8.79621	444.554	17	17	28.264	26.6923	18.0918	18.1952	17	17	29.2585	29.9276	23.8182
Q60675	Laminin subunit alpha-2	Lama2	0.456781	1	2.32527	5.01159	0.921493	1	0.345696	1.27076	0.522855	1	-1.97957	0.253565	0.42265	1	-5.01612	0.0309029	0.57733	1	2.49241	5.62719	0.567825	0.638577	2.53721	5.80464	0.992128	1	0.0447909	1.03153	0.495025	0.82134	-3.03971	0.121606	0.73207	0.812048	2.02119	4.05919	17	17	25.6224	24.9739	17	17	17	17	26.1191	27.0322	17
Q9CZU3	Exosome RNA helicase MTR4	Mtrex	0.434638	1	2.24093	4.72703	0.976326	1	0.00329208	1.00228	0.37561	1	-2.23764	0.212033	0.0708678	0.835122	0.371769	1.29394	0.376853	1	3.87984	14.7214	0.469317	0.795158	-0.0974108	0.934709	0.366374	1	-3.97725	0.0634934	0.457279	0.819393	4.29221	19.5923	0.74606	0.941465	-0.0568072	0.961389	29.0041	28.6338	28.7669	28.6758	29.1744	29.0347	28.6411	28.7958	17	28.8106	28.6549
P51667	Myosin regulatory light chain 2, ventricular/cardiac muscle isoform	Myl2	0.615307	1	2.16886	4.49667	0.883028	1	0.634544	1.55245	0.692403	1	-1.53431	0.345244	0.0806883	0.625882	-10.7824	0.000567787	0.766928	1	1.76359	3.39542	0.177764	0.381426	6.39464	84.1355	0.331749	1	4.63105	24.7791	0.362029	0.820702	-5.64109	0.0200383	0.0383474	0.152932	9.77232	874.504	17	17	29.4519	26.7622	17	17	20.371	17	30.5522	31.0461	24.5186
P01872	Immunoglobulin heavy constant mu	Ighm	0.427401	1	2.1531	4.44781	0.621662	1	-0.406771	0.75431	0.2984	1	-2.55987	0.169591	0.466993	1	-1.24261	0.422608	0.433576	1	3.21037	9.25588	0.560509	0.72971	-0.227669	0.854013	0.405243	1	-3.43804	0.0922671	0.487396	0.824004	3.76712	13.6149	0.234707	0.353472	1.57169	2.97252	29.0683	27.5612	27.3499	26.899	28.2696	27.3839	25.7479	17	29.4311	30.392	27.7468
P50608	Fibromodulin	Fmod	0.490613	1	2.08525	4.24349	0.797453	1	0.798918	1.7398	0.645798	1	-1.28633	0.409991	0.0451287	0.669143	-7.78012	0.00454936	0.616624	1	2.17177	4.50574	0.116134	0.311967	5.21462	37.1328	0.373901	1	3.04286	8.24121	0.495025	0.821246	-3.04286	0.121341	0.00885191	0.215619	7.78012	219.811	17	17	24.7707	24.8731	17	17	17	17	26.1286	26.4914	23.0689
P83917	Chromobox protein homolog 1	Cbx1	0.40328	1	2.06961	4.19773	0.865717	1	-0.353122	0.782888	0.278257	1	-2.42273	0.186503	0.624688	1	0.121434	1.08782	0.11639	1	4.13538	17.5741	0.995753	0.996104	0.0165386	1.01153	0.116322	1	-4.11884	0.0575579	1.69024e-05	0.532	6.70242	104.143	0.423253	0.470393	2.46214	5.51034	23.5962	23.3659	17	23.0403	23.8798	23.525	17	17	17	23.4648	23.6972
Q9WV35	C->U-editing enzyme APOBEC-2	Apobec2	0.445513	1	2.05765	4.16307	0.820033	1	0.710452	1.63632	0.620225	1	-1.3472	0.393055	0.42265	1	-5.39964	0.023689	0.564108	1	2.22514	4.67556	0.257741	0.390632	3.57957	11.9553	0.66181	1	1.35443	2.55697	0.495025	0.820777	-2.59195	0.165861	0.407361	0.457127	4.16212	17.9029	17	17	24.5599	23.8913	17	17	17	17	24.7759	27.7993	17
Q921I9	Exosome complex component RRP41	Exosc4	0.302105	1	2.04818	4.13583	0.94754	1	-0.11492	0.923434	0.216818	1	-2.1631	0.223277	0.975923	1	-0.122085	0.918859	0.494763	1	1.85259	3.61148	0.404929	0.547912	-1.67118	0.313997	0.107056	1	-3.52377	0.086944	0.804087	0.941312	0.775456	1.71173	0.268717	0.369038	-2.62623	0.161967	22.573	22.7643	17	21.8854	17	21.9455	17	22.0919	17	22.1897	17
Q9D1M7	Peptidyl-prolyl cis-trans isomerase FKBP11	Fkbp11	0.282279	1	2.02443	4.06832	0.640514	1	0.315034	1.24404	0.312645	1	-1.7094	0.305787	0.347644	0.882429	-3.42928	0.0928291	0.649344	1	0.500395	1.4146	0.920293	0.94011	-0.0624167	0.957659	0.629194	1	-0.562812	0.676981	0.160338	0.421326	-4.49877	0.044232	0.0988682	0.146473	-1.6323	0.322574	23.6862	24.7521	25.3812	24.2311	17	22.5779	25.2867	25.2165	22.3601	22.8201	23.6164
Q60997	Deleted in malignant brain tumors 1 protein	Dmbt1	0.292352	1	1.97	3.91767	0.738504	1	0.765728	1.70023	0.346594	1	-1.20427	0.43399	NaN	1	0	1	0.373901	1	2.62666	6.17595	0.860457	0.873868	0.619548	1.53639	0.373901	1	-2.00711	0.248771	NaN	1	0	1	0.495025	0.570548	-2.00711	0.248771	17	17	24.88	17	17	17	17	17	17	17	17
Q60991	Cytochrome P450 7B1	Cyp7b1	0.519918	1	1.92859	3.80684	0.830515	1	0.451362	1.36733	0.600791	1	-1.47723	0.359178	0.535078	1	-2.75416	0.148223	0.902343	1	0.0834401	1.05954	0.102642	0.392055	-0.542504	0.686578	0.402615	1	-0.625944	0.647996	0.0660332	0.322222	-7.96131	0.00401241	0.00361776	0.24864	-5.8331	0.0175413	23.2973	28.8808	28.5667	28.5167	17	24.22	29.3381	29.0501	27.3258	22.5147	24.2136
Q62188	Dihydropyrimidinase-related protein 3	Dpysl3	0.3669	1	1.90418	3.74296	0.870448	1	0.402679	1.32196	0.46373	1	-1.5015	0.353185	0.317605	0.815066	-3.75376	0.0741322	0.11686	1	4.00928	16.1032	0.11686	0.332892	4.00928	16.1032	NaN	1	0	1	0.272228	0.764439	2.75694	6.75962	0.00108797	0.292111	6.5107	91.1833	17	17	23.274	22.7539	17	22.5139	17	17	17	24.2061	22.8153
Q5F2F2	Protein ABHD15	Abhd15	0.396605	1	1.86455	3.64154	0.832561	1	-0.49722	0.70847	0.245582	1	-2.36177	0.194553	NaN	1	0	1	0.505946	1	2.08627	4.24649	0.416604	0.549203	-1.85001	0.277391	0.120351	1	-3.93628	0.0653224	0.495025	0.819838	-1.99895	0.250181	1.96834e-06	0.119273	-5.93523	0.0163424	17	17	23.0221	23.2336	17	17	17	22.9969	17	17	17
P04247	Myoglobin	Mb	0.738893	1	1.85308	3.6127	0.950936	1	-0.336948	0.791714	0.620426	1	-2.19003	0.219148	0.0906779	0.586316	-9.67167	0.00122613	0.616084	1	4.13218	17.5352	0.273934	0.392058	6.92992	121.931	0.63915	1	2.79774	6.95349	0.897147	0.973962	-1.00582	0.497987	0.0146263	0.195444	11.4636	2824.13	17	17.0242	33.4586	32.6944	24.6856	20.4898	18.4146	17.9554	34.4106	34.5814	29.9373
Q61554	Fibrillin-1	Fbn1	0.566197	1	1.82671	3.54728	0.849943	1	0.637046	1.55514	0.70637	1	-1.18967	0.438404	0.42265	1	-5.80382	0.017901	0.701919	1	1.75842	3.38327	0.292566	0.394035	3.64485	12.5086	0.637283	1	1.88643	3.6972	0.495025	0.822797	-3.38599	0.0956565	0.430729	0.467705	4.30426	19.7565	17	17	25.4807	23.9525	17	17	17	17	27.158	28.6076	17
O88967	ATP-dependent zinc metalloprotease YME1L1	Yme1l1	0.381107	1	1.79051	3.45937	0.238187	1	0.151271	1.11055	0.360931	1	-1.63924	0.321026	0.87832	1	0.0289431	1.02026	0.363264	1	2.90913	7.51166	0.371471	0.713517	0.157775	1.11557	0.387703	1	-2.75136	0.148511	0.51481	0.835302	2.6982	6.48992	0.731116	0.915017	-0.0820986	0.944682	25.4258	25.5873	25.4893	25.6729	25.2828	25.4618	25.5937	25.4285	17	25.4843	25.2024
Q9JJV2	Profilin-2	Pfn2	0.468947	1	1.76638	3.40198	0.888748	1	-0.341184	0.789393	0.340227	1	-2.10756	0.232039	0.022849	0.802182	-6.31066	0.012598	0.591531	1	1.87459	3.66696	0.401417	0.532105	2.56909	5.93436	0.825343	1	0.694507	1.61833	0.495025	0.821576	-2.40291	0.189083	0.14168	0.147121	4.60226	24.2894	17	17	23.5982	23.2343	17	17	17	17	24.2087	24.2813	22.34
A0A0A6YYE7;A0A0B4J1I4;A0A0B4J1I3;A0A0A6YYE5;A0A075B5M4;A0A075B5L8	Ig-like domain-containing protein	Igkv4-57;Igkv4-72	0.44836	1	1.72998	3.31724	0.732805	1	-0.675186	0.626251	0.261789	1	-2.40517	0.188787	0.341755	0.8586	-3.5236	0.0869542	0.702517	1	1.212	2.31659	0.875886	0.89206	-0.447551	0.733287	0.61916	1	-1.65955	0.316538	0.929387	0.983589	0.349844	1.27442	0.468803	0.512845	2.21389	4.63926	23.1896	22.7306	17	21.9433	22.3916	17	17	17	24.0378	24.1426	22.2962
Q9JIY5	Serine protease HTRA2, mitochondrial	Htra2	0.32582	1	1.72426	3.3041	0.420999	1	-0.10046	0.932736	0.241168	1	-1.82472	0.282296	0.190207	1	-0.326211	0.797629	0.32937	1	2.66347	6.33557	0.363522	0.707579	-0.160247	0.894872	0.305044	1	-2.82372	0.141246	0.496536	0.821603	2.38987	5.2411	0.640179	0.884232	-0.107641	0.928104	24.5281	24.364	24.3913	24.6282	24.1374	24.2377	24.2049	24.1882	17	24.6732	24.3543
P11103	Poly [ADP-ribose] polymerase 1	Parp1	0.470728	1	1.71708	3.28771	0.485973	1	0.15844	1.11608	0.456666	1	-1.55865	0.33947	0.191262	1	0.324937	1.25261	0.373458	1	3.20426	9.21674	0.0462613	0.389485	0.38989	1.31029	0.428737	1	-2.81437	0.142165	0.42434	0.827282	3.80926	14.0185	0.021903	0.139783	0.669952	1.59102	26.7447	26.4822	26.4791	26.8345	27.1867	27.2205	17	26.4155	26.7675	27.0449	26.7124
Q9EQI5	SCY domain-containing protein	Ppbp	0.4131	1	1.70374	3.25744	0.708949	1	-0.240887	0.846225	0.278462	1	-1.94462	0.259782	0.325378	1	-0.684602	0.622178	0.475078	1	2.17412	4.51312	0.13325	0.387387	-0.610516	0.654963	0.371329	1	-2.78464	0.145124	0.500155	0.821114	2.72931	6.6314	0.237994	0.432198	0.629276	1.54679	27.0346	24.4094	24.913	24.3255	25.5118	24.6972	17	24.0135	26.112	26.1277	25.4505
Q60722	Transcription factor 4	Tcf4	0.292352	1	1.70019	3.24943	0.95305	1	-0.157556	0.896543	0.346594	1	-1.85774	0.275908	0.42265	1	-4.64436	0.0399861	0.373901	1	2.26692	4.81293	0.373901	0.489889	2.26692	4.81293	NaN	1	0	1	NaN	1	0	1	0.272228	0.343	4.64436	25.0087	17	23.8007	17	17	17	17	17	17	17	26.2887	17
G5E861	Sodium channel and clathrin linker 1	Sclt1	0.351132	1	1.65739	3.15445	0.932402	1	-0.0252335	0.982662	0.285694	1	-1.68262	0.311516	0.489687	1	-3.3195	0.100168	0.369368	1	0.451554	1.36751	0.63046	0.796728	-0.139809	0.907639	0.178489	1	-0.591363	0.663715	0.37906	0.807155	-3.03693	0.121841	0.546008	0.741053	-0.308784	0.807322	24.3618	24.9045	24.0114	24.2768	17	24.8181	24.1696	24.4267	23.2417	23.6234	24.8337
Q9D1X0	Nucleolar protein 3	Nol3	0.292352	1	1.64067	3.1181	0.948094	1	0.149868	1.10947	0.346594	1	-1.4908	0.355815	0.42265	1	-3.727	0.0755199	0.373901	1	2.18756	4.55534	0.373901	0.496185	2.18756	4.55534	NaN	1	0	1	NaN	1	0	1	0.272228	0.349729	3.727	13.2416	17	17	23.5627	17	17	17	17	17	17	24.454	17
B9EJ86	Oxysterol-binding protein-related protein 8	Osbpl8	0.27011	1	1.63347	3.10258	0.569313	1	0.102646	1.07374	0.236649	1	-1.53082	0.346081	0.110926	0.9786	-0.320401	0.800847	0.278462	1	2.53682	5.80306	0.0391359	0.56699	0.199049	1.14794	0.312493	1	-2.33777	0.197816	0.536498	0.850757	1.8191	3.52861	0.110207	0.586264	-0.198264	0.871599	22.8784	23.6667	23.5789	23.4981	22.9378	22.7892	23.216	22.9172	17	23.094	23.2738
Q7TMR0	Lysosomal Pro-X carboxypeptidase	Prcp	0.39867	1	1.62278	3.07969	0.856311	1	-0.0698435	0.952741	0.32764	1	-1.69263	0.309363	0.429405	1	0.243314	1.18371	0.418088	1	2.45448	5.48116	0.244864	0.52039	-0.528772	0.693144	0.338768	1	-2.98325	0.126459	0.564824	0.849389	2.2673	4.81422	0.161811	0.311754	-0.959266	0.514318	25.1683	24.9172	24.7995	24.8855	24.5234	24.837	17	24.6311	25.6077	24.2453	24.6286
P21550	Beta-enolase	Eno3	0.420582	1	1.60875	3.04987	0.705378	1	0.740849	1.67116	0.643936	1	-0.867899	0.547944	0.220102	0.606545	-4.64986	0.0398338	0.646739	1	1.25603	2.38837	0.187286	0.383773	2.90943	7.51323	0.480232	1	1.65341	3.14576	0.366651	0.797513	-2.72434	0.151318	0.201103	0.202211	3.57893	11.9499	25.7585	25.548	30.9448	29.6267	24.0531	25.3992	25.5089	25.4898	31.3528	31.9275	26.8246
O09164	Extracellular superoxide dismutase [Cu-Zn]	Sod3	0.302468	1	1.57971	2.98909	0.676951	1	0.166945	1.12268	0.306941	1	-1.41276	0.375592	0.202354	0.825421	-0.684051	0.622415	0.278567	1	2.52341	5.74941	0.127086	0.390934	0.624845	1.54205	0.403878	1	-1.89857	0.268209	0.429931	0.824712	2.3746	5.18593	0.0688007	0.14371	1.16008	2.2347	23.5078	23.3159	23.4871	23.6469	23.6676	23.0014	22.3185	17	23.5612	24.1695	23.8676
P01645;P01644;A0A140T8M1;P01647;P01646;P04946;P01648	Ig kappa chain V-V region HP 93G7;Ig kappa chain V-V region HP R16.7	-	0.494038	1	1.57747	2.98446	0.798212	1	-0.545879	0.684974	0.431881	1	-2.12335	0.229514	0.301979	0.817358	-1.90147	0.26767	0.383113	1	2.73884	6.67532	0.863072	0.879303	0.467571	1.38278	0.580139	1	-2.27127	0.207148	0.313583	0.802921	4.37394	20.7342	0.326926	0.396326	4.00415	16.0461	24.8878	22.7159	22.3403	22.5487	24.5479	23.7922	17	17	25.3884	27.3981	24.745
Q3U3R4	Lipase maturation factor 1	Lmf1	0.363148	1	1.53132	2.89051	0.444719	1	0.0999173	1.07171	0.332913	1	-1.4314	0.37077	0.931579	1	0.0260687	1.01823	0.339168	1	2.49356	5.63165	0.61651	0.827699	0.0905037	1.06474	0.354729	1	-2.40305	0.189064	0.48251	0.824225	2.37218	5.17724	0.782477	0.946609	-0.0569385	0.961302	24.0259	24.2151	24.2052	23.8177	23.7568	24.1591	23.6816	24.0757	17	23.7536	24.1102
Q8K199	COX assembly mitochondrial protein 2 homolog	Cmc2	0.36576	1	1.50514	2.83853	0.972696	1	-0.00697899	0.995174	0.300819	1	-1.51212	0.350595	0.374523	1	-0.324424	0.798617	0.39089	1	2.21792	4.65222	0.735381	0.859338	-0.0859998	0.942131	0.373609	1	-2.30392	0.202512	0.527757	0.84158	2.11814	4.34133	0.506583	0.811954	0.13864	1.10087	24.3521	23.9006	23.4329	24.1092	23.4504	23.9785	17	23.7991	23.9898	24.1491	23.9286
A0A075B5V1;A0A075B5V6;A0A075B5V2;A0A075B5V7;A0A075B5U4;A0A075B5U6;A0A075B5U7;P01757;P01756	Ig-like domain-containing protein	Ighv1-31;Ighv1-42	0.516074	1	1.466	2.76255	0.407334	1	-0.700578	0.615325	0.297934	1	-2.16658	0.222738	0.634574	1	-0.760534	0.590278	0.453485	1	2.45533	5.48439	0.25837	0.466348	-0.648608	0.637896	0.358736	1	-3.10394	0.116311	0.409297	0.837518	3.65857	12.6281	0.34449	0.442404	1.31516	2.4883	27.0216	25.2921	24.8933	25.1902	26.0501	26.6068	24.0435	17	26.9661	28.4303	25.7477
Q6A4J8	Ubiquitin carboxyl-terminal hydrolase 7	Usp7	0.317218	1	1.46585	2.76225	0.679373	1	0.109225	1.07865	0.294222	1	-1.35662	0.390496	0.294907	1	0.184348	1.1363	0.307426	1	2.31271	4.96815	0.846835	0.907638	-0.0712242	0.95183	0.295742	1	-2.38393	0.191587	0.468104	0.820263	2.10375	4.29826	0.275151	0.47299	-0.464528	0.724708	23.2098	23.0536	23.6764	22.9638	23.1002	22.9445	23.1623	22.5934	17	22.7325	22.9435
Q6PGH2	Jupiter microtubule associated homolog 2	Jpt2	0.4367	1	1.43324	2.70053	0.308044	1	0.141822	1.1033	0.424273	1	-1.29142	0.408549	0.543112	1	0.108312	1.07797	0.436621	1	2.25767	4.78217	0.847407	0.929888	0.0330919	1.0232	0.443212	1	-2.22457	0.213962	0.558109	0.849404	2.21673	4.64839	0.613261	0.869333	-0.116153	0.922645	24.7272	24.6404	24.358	24.4359	24.4831	24.3913	25.0589	24.6024	17	24.187	24.4707
Q9JKS5	Intracellular hyaluronan-binding protein 4	Habp4	0.448461	1	1.43224	2.69865	0.862414	1	-0.0654357	0.955657	0.373212	1	-1.49767	0.354124	0.299769	1	0.345463	1.27056	0.431323	1	2.36411	5.14835	0.396401	0.62341	-0.362319	0.777913	0.369691	1	-2.72643	0.1511	0.57917	0.854808	2.15218	4.44499	0.0859603	0.170279	-0.91971	0.528615	24.4563	24.931	24.1694	25.1203	24.4456	24.6111	25.1408	24.9876	17	23.948	24.4178
Q6Y7W8	GRB10-interacting GYF protein 2	Gigyf2	0.337015	1	1.41664	2.66962	0.437092	1	0.151918	1.11105	0.329463	1	-1.26472	0.41618	0.828534	1	0.106801	1.07684	0.287957	1	2.40856	5.30946	0.119362	0.575373	0.229499	1.17243	0.330536	1	-2.17907	0.220819	0.442753	0.817419	2.24084	4.72673	0.901264	0.971783	-0.0450236	0.969274	22.9537	23.4149	23.3515	23.2418	23.0254	23.3113	17	23.0672	22.7154	22.6519	23.4712
Q9EQ32	Phosphoinositide 3-kinase adapter protein 1	Pik3ap1	0.417546	1	1.40695	2.65176	0.318417	1	0.132475	1.09617	0.403229	1	-1.27448	0.413375	0.455374	1	0.232376	1.17477	0.351252	1	2.46365	5.51612	0.143675	0.631461	0.184608	1.13651	0.384983	1	-2.27905	0.206034	0.437272	0.823633	2.69639	6.48179	0.471635	0.771706	0.18497	1.13679	24.2238	24.1802	24.0676	24.1615	24.3804	24.3579	17	24.076	23.9423	23.884	24.3896
Q8CJG0;Q8CJF9	Protein argonaute-2;Protein argonaute-3	Ago2;Ago3	0.443929	1	1.39414	2.62832	0.514241	1	0.221162	1.16567	0.465947	1	-1.17298	0.443505	0.582216	1	-0.0152111	0.989512	0.379012	1	2.43775	5.41796	0.2093	0.473437	0.492926	1.4073	0.475636	1	-1.94482	0.259747	0.443773	0.816646	2.79287	6.93007	0.0857445	0.172827	0.863257	1.81914	24.6498	24.6927	24.3637	24.0105	24.6995	24.7221	17	24.4169	24.3368	24.7465	24.7055
Q922D4	Serine/threonine-protein phosphatase 6 regulatory subunit 3	Ppp6r3	0.387748	1	1.38084	2.60421	0.446787	1	0.0824897	1.05884	0.355684	1	-1.29836	0.40659	0.872638	1	0.0264263	1.01849	0.335988	1	2.34239	5.07142	0.105961	0.634562	0.160847	1.11794	0.366502	1	-2.18154	0.22044	0.436538	0.819876	2.47842	5.57286	0.105425	0.468936	0.27045	1.20618	23.7451	23.6175	23.7149	23.545	23.8446	23.6791	23.5743	23.276	17	23.8551	23.6157
Q8VCH7	Retinol dehydrogenase 10	Rdh10	0.358526	1	1.37832	2.59965	0.548881	1	0.160258	1.11749	0.349675	1	-1.21806	0.429861	0.64948	1	0.152388	1.11141	0.31128	1	2.29358	4.9027	0.703327	0.813536	0.161889	1.11875	0.337335	1	-2.13169	0.228191	0.411848	0.828005	2.39955	5.27638	0.674721	0.885679	0.115472	1.08333	23.3339	23.6766	22.4847	23.3056	22.9999	23.5234	17	23.2504	22.3358	22.9893	23.2292
Q8C8R3	Ankyrin-2	Ank2	0.44106	1	1.37592	2.59534	0.438681	1	-0.102689	0.931296	0.349327	1	-1.47861	0.358834	0.413601	1	-0.213017	0.862731	0.395	1	2.35424	5.11325	0.789546	0.928567	0.031901	1.02236	0.400418	1	-2.32234	0.199943	0.49388	0.821587	2.48048	5.58083	0.000481441	0.166518	0.371155	1.29339	24.3441	24.4365	24.0714	24.3581	24.6221	24.2077	24.1837	24.6196	17	24.6469	24.609
Q9CY66	H/ACA ribonucleoprotein complex subunit 1	Gar1	0.424501	1	1.37124	2.58692	0.57236	1	-0.0661919	0.955156	0.342849	1	-1.43743	0.369225	0.853442	1	0.0453949	1.03197	0.378114	1	2.35519	5.11662	0.62651	0.850143	-0.0707874	0.952118	0.364933	1	-2.42598	0.186083	0.498115	0.818096	2.35821	5.12735	0.47013	0.831353	-0.11316	0.924561	23.9343	23.9278	24.026	24.3371	23.9529	24.2471	24.3613	23.864	17	23.8955	24.2136
O35166	Golgi SNAP receptor complex member 2	Gosr2	0.420758	1	1.34558	2.54132	0.533578	1	0.14231	1.10367	0.414941	1	-1.20327	0.434291	0.522724	1	0.247029	1.18676	0.394139	1	2.23559	4.70954	0.819418	0.902553	0.0654577	1.04642	0.409318	1	-2.17013	0.222191	0.528474	0.840662	2.14982	4.43771	0.563184	0.770499	-0.267343	0.830849	23.8006	23.9785	23.9934	23.7907	23.8597	23.8105	24.03	24.0259	17	23.2674	23.9088
Q6PEB6	MOB-like protein phocein	Mob4	0.431568	1	1.31095	2.48105	0.322841	1	0.298062	1.22949	0.488599	1	-1.01289	0.495552	0.528793	1	0.0717802	1.05101	0.391086	1	2.20336	4.60552	0.262095	0.548425	0.467359	1.38258	0.492389	1	-1.736	0.3002	0.478579	0.825534	2.379	5.20175	0.220983	0.432251	0.571213	1.48577	24.005	23.4077	24.1704	23.7265	23.9526	23.9351	23.786	23.9086	17	23.7775	23.9667
Q9DC63	F-box only protein 3	Fbxo3	0.418425	1	1.30095	2.46392	0.973354	1	0.00846195	1.00588	0.362195	1	-1.29249	0.408245	0.599987	1	0.22396	1.16793	0.39295	1	2.09514	4.27266	0.503729	0.717835	-0.208324	0.865542	0.353545	1	-2.30346	0.202577	0.469766	0.821212	2.33067	5.03039	0.633487	0.826306	-0.196749	0.872514	24.0114	23.6769	23.5564	23.1438	23.9095	23.4796	17	23.7209	23.3708	23.1783	23.7629
Q60902	Epidermal growth factor receptor substrate 15-like 1	Eps15l1	0.399189	1	1.3001	2.46245	0.278571	1	0.202586	1.15076	0.414062	1	-1.09751	0.467322	0.992283	1	-0.00431728	0.997012	0.364322	1	2.18083	4.53415	0.183444	0.549611	0.354526	1.27857	0.438141	1	-1.82631	0.281986	0.510269	0.839006	2.05069	4.14304	0.233433	0.619732	0.2287	1.17178	23.1808	23.3233	23.1143	23.8303	23.6454	22.9396	23.2397	23.4857	17	23.4756	23.118
E9Q6D8	Complement component 6	C6	0.655418	1	1.29926	2.46103	0.942283	1	0.188282	1.13941	0.665286	1	-1.11098	0.46298	0.42265	1	-2.40413	0.188923	0.657299	1	0.176097	1.12982	0.860176	0.91236	-0.0727851	0.950801	0.245405	1	-0.248882	0.841549	9.12221e-06	0.433333	-7.78126	0.00454577	0.0524646	0.131045	-5.62601	0.0202489	17	25.6521	24.7373	24.4826	17	17	24.5891	24.8572	24.8975	17	21.8083
Q91XL1	LRRCT domain-containing protein	Lrg1	0.459499	1	1.29741	2.45787	0.919425	1	-0.0333137	0.977173	0.392783	1	-1.33072	0.397569	0.379838	0.915379	-3.52421	0.0869176	0.144471	1	-0.602646	0.658545	0.0994891	0.392943	-0.471043	0.721443	0.739148	1	0.131603	1.09551	0.16596	0.440171	-4.30304	0.0506591	0.214752	0.412287	-0.647226	0.638507	24.5368	23.6481	23.7952	24.0209	23.242	17	23.9085	24.3691	24.9946	24.0878	23.2027
P70387	Hereditary hemochromatosis protein homolog	Hfe	0.368708	1	1.29667	2.45661	0.268062	1	0.33195	1.25871	0.439273	1	-0.964717	0.512379	0.578785	1	0.236862	1.17843	0.343561	1	2.12194	4.35279	0.41453	0.635487	0.356171	1.28002	0.417724	1	-1.76577	0.29407	0.480904	0.825662	2.01734	4.04837	0.970189	0.993022	0.0147101	1.01025	22.933	23.5241	22.3572	23.1377	22.8903	22.9131	22.5908	23.0623	17	22.3044	23.0253
Q64324	Syntaxin-binding protein 2	Stxbp2	0.350624	1	1.2804	2.42907	0.771597	1	0.104442	1.07508	0.3152	1	-1.17596	0.442589	0.589303	1	0.177155	1.13065	0.364549	1	1.78445	3.44487	0.165985	0.564525	-0.293588	0.81587	0.300078	1	-2.07804	0.236836	0.4079	0.828048	2.16175	4.47459	0.727315	0.909384	-0.0934401	0.937285	23.7103	22.0405	22.3714	22.3911	22.7924	22.4976	17	22.3085	22.1412	22.232	22.7037
Q99LT0	Protein dpy-30 homolog	Dpy30	0.382739	1	1.27371	2.41783	0.476144	1	0.293925	1.22597	0.451555	1	-0.979787	0.507054	0.689558	1	-0.144764	0.904527	0.399219	1	1.92678	3.80206	0.547346	0.685399	0.390312	1.31068	0.504922	1	-1.53647	0.344728	0.54603	0.851054	1.78392	3.4436	0.615798	0.771663	0.392211	1.3124	23.2259	23.2693	23.1893	22.4933	22.546	23.1361	23.1589	23.0126	17	22.8801	23.0916
Q9Z2N8	Actin-like protein 6A	Actl6a	0.421694	1	1.27277	2.41624	0.886386	1	-0.0207564	0.985716	0.355461	1	-1.29352	0.407954	0.223823	1	-0.147269	0.902958	0.37994	1	2.16622	4.48846	0.597526	0.811191	0.108529	1.07813	0.402854	1	-2.05769	0.2402	0.500568	0.824178	2.16488	4.48429	0.326567	0.647925	0.254457	1.19289	23.4368	23.6905	23.5677	23.3823	23.6208	23.4702	17	23.3203	23.8215	23.7314	23.6541
Q6PHZ2	Calcium/calmodulin-dependent protein kinase type II subunit delta	Camk2d	0.399529	1	1.26915	2.41019	0.659849	1	-0.142624	0.90587	0.288886	1	-1.41177	0.375851	0.181273	0.834109	-0.627565	0.647268	0.375224	1	2.11889	4.34359	0.646741	0.774724	0.184315	1.13628	0.410692	1	-1.93457	0.261599	0.559761	0.849057	1.77417	3.42042	0.238162	0.460889	0.467168	1.38239	22.7264	23.0577	23.9299	22.8725	22.8306	23.0534	17	22.7983	23.7051	23.8601	23.279
Q91YR9	Prostaglandin reductase 1	Ptgr1	0.377336	1	1.25991	2.3948	0.473545	1	0.16678	1.12255	0.3821	1	-1.09313	0.468745	0.13311	0.92451	0.370661	1.29294	0.299744	1	2.24329	4.73475	0.625372	0.771294	0.174304	1.12842	0.335092	1	-2.06898	0.238327	0.408325	0.828882	2.31845	4.98794	0.74909	0.907044	-0.121199	0.919423	22.7636	23.3251	22.5976	23.04	23.0608	23.0646	22.5357	22.6972	17	22.8428	22.5414
Q921M4	Golgin subfamily A member 2	Golga2	0.467543	1	1.24725	2.37389	0.809382	1	0.0352804	1.02476	0.423395	1	-1.21197	0.431679	0.808403	1	-0.0887909	0.94031	0.482731	1	1.92588	3.79968	0.818172	0.928003	-0.0348784	0.976114	0.475861	1	-1.96076	0.256894	0.622788	0.854726	1.75848	3.38342	0.706628	0.895497	-0.113484	0.924353	24.0076	24.0096	23.8613	23.8548	23.5957	23.8866	24.474	24.474	17	23.5431	24.1168
Q9EPA7	Nicotinamide/nicotinic acid mononucleotide adenylyltransferase 1	Nmnat1	0.601626	1	1.23588	2.35525	0.928411	1	0.186191	1.13776	0.602531	1	-1.04969	0.483073	0.9982	1	-0.0116186	0.991979	0.281351	1	2.55877	5.89205	0.10454	0.382561	0.817037	1.76178	0.439806	1	-1.74173	0.29901	0.833495	0.955325	-0.813478	0.569009	0.370212	0.439098	-2.54359	0.171515	17	23.9935	22.8877	23.8982	17	23.4418	22.7266	23.3765	17	17	23.465
Q9D773	39S ribosomal protein L2, mitochondrial	Mrpl2	0.49057	1	1.23249	2.34972	0.626888	1	0.0939952	1.06732	0.469138	1	-1.1385	0.454233	0.421018	1	0.256737	1.19477	0.457127	1	2.09405	4.26944	0.926233	0.955869	0.0253951	1.01776	0.462813	1	-2.06865	0.238382	0.553751	0.847443	2.18219	4.53843	0.682684	0.875628	-0.143195	0.905512	24.2168	24.2858	23.8663	24.3625	24.1519	24.3675	24.8417	24.3907	17	23.7711	24.2348
P98078	Disabled homolog 2	Dab2	0.438653	1	1.2165	2.32382	0.640769	1	0.117471	1.08483	0.428646	1	-1.09903	0.466832	0.796128	1	-0.0935726	0.937199	0.389651	1	2.08645	4.24702	0.235274	0.568785	0.317122	1.24584	0.459833	1	-1.76933	0.293345	0.480239	0.824162	2.24096	4.72712	0.178075	0.40036	0.565204	1.4796	23.5105	23.6553	23.4252	23.1338	23.5717	23.5469	23.4677	23.4873	17	23.3354	23.9704
Q571E4	N-acetylgalactosamine-6-sulfatase	Galns	0.404182	1	1.20834	2.31072	0.803978	1	-0.118238	0.921312	0.318215	1	-1.32658	0.398713	0.457377	1	-2.45119	0.18286	0.972455	1	-0.0151374	0.989562	0.100944	0.39509	-0.591973	0.663435	0.178075	1	-0.576836	0.670433	0.200193	0.486023	-3.336	0.0990294	0.00805212	0.153608	-1.46164	0.363079	22.5514	23.1528	22.5099	23.3226	17	22.3485	23.6512	22.8218	22.5577	21.9079	22.3429
Q9DCR2	AP-3 complex subunit sigma-1	Ap3s1	0.449068	1	1.19268	2.28576	0.837997	1	-0.0290273	0.980081	0.37921	1	-1.2217	0.428776	0.896449	1	0.0206118	1.01439	0.404615	1	2.05921	4.16758	0.965522	0.980685	0.00929451	1.00646	0.406868	1	-2.04991	0.241498	0.525362	0.842874	2.04384	4.12341	0.907501	0.977932	-0.0266898	0.98167	23.2794	23.2957	23.4037	23.7267	23.5669	23.3531	23.5651	23.6834	17	23.3489	23.5298
Q3TC93	HCLS1-binding protein 3	Hs1bp3	0.391631	1	1.1689	2.2484	0.93795	1	0.0187263	1.01306	0.343224	1	-1.15017	0.450572	0.535535	1	0.0791683	1.05641	0.395187	1	1.8265	3.54677	0.690088	0.813425	-0.143223	0.905494	0.366674	1	-1.96973	0.255301	0.546327	0.847112	1.6761	3.19564	0.405373	0.630111	-0.372793	0.772286	22.6992	22.9134	22.3988	22.6314	22.3909	22.6041	22.9157	22.5484	17	22.4243	22.4124
P97314	Cysteine and glycine-rich protein 2	Csrp2	0.478361	1	1.15416	2.22555	0.712364	1	0.0511205	1.03607	0.439454	1	-1.10304	0.465535	0.0674799	0.821124	0.359315	1.28282	0.38526	1	2.15361	4.44941	0.729415	0.868544	0.0756721	1.05385	0.399053	1	-2.07794	0.236852	0.441094	0.815211	2.51821	5.7287	0.484225	0.881233	0.0809498	1.05771	23.5847	23.3153	23.4034	23.9415	23.9484	23.8876	17	23.4082	23.7912	23.6523	23.4651
Q9JJ00	Phospholipid scramblase 1	Plscr1	0.507113	1	1.15379	2.22498	0.506769	1	0.211819	1.15815	0.539087	1	-0.941971	0.520521	0.0625992	0.524465	0.733258	1.66239	0.496149	1	1.84791	3.59979	0.516403	0.718784	-0.210878	0.864011	0.454057	1	-2.05879	0.240017	0.551866	0.850788	2.13003	4.37727	0.189241	0.393491	-0.662019	0.631993	24.418	23.6308	23.7822	23.9465	24.0924	24.0448	24.4595	24.3562	17	23.1442	23.5265
E9Q512	GRIP domain-containing protein	Trip11	0.728673	1	1.1453	2.21192	0.892255	1	-0.388356	0.764	0.60214	1	-1.53366	0.345401	0.421953	1	-4.44108	0.0460363	0.974561	1	-0.144799	0.904505	0.952803	0.949791	0.259828	1.19734	0.927596	1	0.404627	1.32375	0.766395	0.926258	-1.67305	0.31359	0.453092	0.487043	3.17266	9.01708	25.4392	25.9222	25.945	17	17	25.8549	25.7906	26.511	17	25.6461	26.091
Q91YD9	Neural Wiskott-Aldrich syndrome protein	Wasl	0.494855	1	1.08157	2.11634	0.801918	1	-0.076472	0.948374	0.41477	1	-1.15805	0.448119	0.50703	1	-0.0998793	0.933111	0.403083	1	2.00718	4.01997	0.689182	0.814159	0.143695	1.10473	0.439091	1	-1.86349	0.274811	0.438015	0.817751	2.47346	5.55372	0.191622	0.390541	0.709845	1.63563	23.5496	23.136	23.3209	23.4266	23.8446	23.6769	23.2278	23.6341	17	23.7684	23.9529
Q9CQ19	Myosin regulatory light polypeptide 9	Myl9	0.559232	1	1.07948	2.11328	0.898911	1	-0.119512	0.920499	0.505051	1	-1.199	0.435578	0.981004	1	-0.0467672	0.968103	0.419994	1	2.26039	4.79121	0.782839	0.828668	0.293242	1.22539	0.498417	1	-1.96715	0.255758	0.438036	0.822521	2.8729	7.32536	0.619391	0.727633	0.952518	1.93525	23.9293	23.2794	24.6459	24.2437	24.2862	25.0514	17	23.0678	25.3199	26.4136	23.0176
O55003	BCL2/adenovirus E1B 19 kDa protein-interacting protein 3	Bnip3	0.467786	1	1.06515	2.09239	0.777959	1	0.108741	1.07829	0.459015	1	-0.956409	0.515338	0.157166	0.980796	0.355854	1.27974	0.45778	1	1.63327	3.10216	0.67941	0.789329	-0.197978	0.871771	0.419232	1	-1.83125	0.281021	0.47268	0.824081	2.1026	4.29483	0.893111	0.960769	-0.0845044	0.943108	23.6952	22.7524	22.5548	22.5033	23.0537	23.092	17	22.7693	23.1414	22.8765	22.5575
Q9QUR7	Peptidyl-prolyl cis-trans isomerase NIMA-interacting 1	Pin1	0.497148	1	1.0574	2.08118	0.86651	1	-0.0265796	0.981745	0.429142	1	-1.08398	0.471726	0.435723	1	-3.14999	0.112657	0.364159	1	-0.218527	0.859442	0.747254	0.872529	0.0748348	1.05324	0.149389	1	0.293362	1.22549	0.277703	0.763367	-3.21759	0.1075	0.27295	0.645872	0.225765	1.1694	23.2122	22.8948	23.4297	23.4453	17	23.5151	23.2528	23.6261	23.5465	23.4997	23.3153
Q3UBZ5	MIF4G domain-containing protein	Mif4gd	0.457267	1	1.01782	2.02485	0.350114	1	-0.286598	0.819833	0.292516	1	-1.30442	0.404885	0.612623	1	-0.100542	0.932682	0.393746	1	1.78374	3.44317	0.509034	0.681118	-0.323261	0.799261	0.330013	1	-2.107	0.23213	0.455641	0.812196	2.05085	4.14349	0.938741	0.98025	0.04439	1.03125	22.715	22.1166	22.7123	22.6631	22.8533	22.6757	22.438	22.7029	17	22.721	23.009
Q64191	N(4)-(beta-N-acetylglucosaminyl)-L-asparaginase	Aga	0.553756	1	0.991159	1.98778	0.980559	1	-0.00421267	0.997084	0.499431	1	-0.995372	0.501607	0.291969	1	0.409407	1.32814	0.445343	1	1.94216	3.84281	0.955412	0.977335	0.0102723	1.00715	0.447184	1	-1.93189	0.262086	0.452465	0.810673	2.54931	5.85355	0.448316	0.739007	0.208016	1.1551	23.7837	23.2376	23.5804	23.7084	24.219	24.0128	17	24.1994	23.5005	23.4368	23.9762
Q80Y81	Zinc phosphodiesterase ELAC protein 2	Elac2	0.684602	1	0.957296	1.94167	0.885411	1	-0.300728	0.811843	0.54999	1	-1.25802	0.418116	0.988819	1	0.0710716	1.0505	0.369744	1	2.14256	4.41545	0.991219	0.996125	-0.00152842	0.998941	0.369541	1	-2.14409	0.226238	0.796442	0.941592	-1.0248	0.491477	0.261083	0.341668	-3.23996	0.105846	17	23.2147	23.5045	23.423	17	23.4268	23.474	23.2406	17	23.2846	17
Q99JR6	Nicotinamide/nicotinic acid mononucleotide adenylyltransferase 3	Nmnat3	0.504014	1	0.943261	1.92287	0.623062	1	-0.121364	0.919318	0.397595	1	-1.06462	0.478097	0.902778	1	-0.0372705	0.974497	0.397382	1	1.80713	3.49945	0.859114	0.920631	0.0575994	1.04073	0.412996	1	-1.74953	0.297399	0.4344	0.819113	2.21594	4.64584	0.213914	0.439461	0.503683	1.41783	22.6539	22.5554	22.874	22.2622	23.2417	22.7037	22.133	17	23.1372	23.0304	22.9895
Q9ER39	Torsin-1A	Tor1a	0.564533	1	0.869883	1.82751	0.910503	1	-0.0329608	0.977412	0.504318	1	-0.902844	0.534831	0.253973	0.862192	0.854836	1.80855	0.450485	1	1.7371	3.33365	0.121936	0.512705	-0.337526	0.791397	0.375942	1	-2.07463	0.237396	0.460153	0.813105	2.26992	4.82295	0.225822	0.41816	-0.659549	0.633076	23.056	23.0215	22.8249	22.8327	23.5963	23.2554	23.1624	23.3054	17	22.0591	23.0829
Q8K0Y2	Keratin, type I cuticular Ha3-I	Krt33a	0.532521	1	0.803825	1.74572	0.76896	1	-0.476162	0.718888	0.421603	1	-1.27999	0.411799	0.0522004	0.515378	-1.405	0.377617	0.221106	1	2.19884	4.59111	0.660577	0.718261	1.0022	2.00305	0.613709	1	-1.19664	0.436289	0.18607	0.484613	2.53114	5.7803	0.339882	0.417199	2.73951	6.67841	25.227	27.7764	27.7346	24.7608	26.9301	27.249	22.9552	23.9467	26.7733	28.2008	28.7883
Q9JIY7	N-acetyltransferase 8	Nat8	0.794691	1	0.785626	1.72384	0.811532	1	-0.715465	0.609009	0.588105	1	-1.50109	0.353286	NaN	1	0	1	0.995771	1	0.0205638	1.01436	0.390702	0.524468	-2.48126	0.179089	0.387289	1	-2.50182	0.176554	0.2207	0.51093	-5.13469	0.0284645	1.1663e-05	0.122333	-7.63651	0.00502553	17	17	24.634	24.8318	17	17	25.1267	24.2774	17	17	17
Q9DCJ9	N-acetylneuraminate lyase	Npl	0.741513	1	0.738527	1.66847	0.81248	1	-0.545376	0.685213	0.534123	1	-1.2839	0.410683	0.66945	1	-0.179364	0.883092	0.373901	1	1.89336	3.71499	0.96564	0.963506	-0.126904	0.915795	0.373901	1	-2.02026	0.246513	2.27137e-05	0.468	5.54515	46.6934	0.252215	0.318146	3.70425	13.0344	23.1463	22.6801	17	17	22.7071	22.3832	17	17	17	22.4006	23.0484
Q3UD01	Ataxin-7-like protein 3B	Atxn7l3b	0.728832	1	0.687944	1.61099	0.884823	1	-0.250255	0.840748	0.596247	1	-0.938199	0.521884	0.503544	1	0.222787	1.16699	0.516664	1	1.74497	3.35187	0.989965	0.991059	0.0327772	1.02298	0.521816	1	-1.71219	0.305197	0.185148	0.458811	3.83068	14.2282	0.458056	0.505433	1.8957	3.72103	22.3772	22.0043	22.4244	17	22.4906	22.6333	17	17	22.1938	22.0731	22.6052
Q8CF02	Protein FAM25C	Fam25c	0.744757	1	0.569744	1.48426	0.283518	1	-0.644325	0.639792	0.454172	1	-1.21407	0.431051	0.49199	1	-2.96355	0.128199	0.344131	1	-0.710062	0.611294	0.387755	0.564998	-0.757813	0.591392	0.963865	1	-0.0477511	0.967443	0.280025	0.759412	-3.63772	0.0803412	0.521602	0.652323	-0.721919	0.606291	22.7713	23.7299	23.1083	23.5791	17	24.0896	24.9038	24.7281	22.9157	23.2659	23.7508
Q8CG14;Q8CFG8	Complement C1s-A subcomponent;Complement C1s-B subcomponent	C1sa;C1sb	0.836621	1	0.501261	1.41545	0.85708	1	-0.414289	0.750389	0.674605	1	-0.915549	0.530142	NaN	1	0	1	0.503875	1	-2.16792	0.222531	0.146606	0.38532	-3.69384	0.0772759	0.515235	1	-1.52592	0.347259	0.223276	0.564042	-4.21419	0.0538769	0.00015729	0.2152	-5.74011	0.0187092	22.9803	23.1388	17	17	17	17	23.8858	17	22.7568	17	17
Q9ERD7	Tubulin beta-3 chain	Tubb3	0.841036	1	0.453378	1.36924	0.845935	1	-0.457935	0.728028	0.65568	1	-0.911312	0.531701	0.42265	1	3.33159	10.0672	0.373901	1	2.38135	5.21025	0.687658	0.729815	-1.35856	0.38997	0.141892	1	-3.73992	0.0748468	0.272228	0.745701	3.33159	10.0672	0.252171	0.318088	-3.73992	0.0748468	17	17	17	24.1441	23.6632	17	17	17	17	17	17
P13634	Carbonic anhydrase 1	Ca1	0.755841	1	0.388384	1.30893	0.556338	1	-0.433268	0.740582	0.481037	1	-0.821652	0.565794	0.572063	1	-1.3728	0.38614	0.964434	1	-0.0714423	0.951686	0.441479	0.61115	-0.52566	0.694641	0.790604	1	-0.454218	0.729906	0.991762	0.998214	-0.0262515	0.981968	0.460259	0.577508	0.892333	1.85618	28.1796	26.276	26.7834	26.0875	28.2173	24.6377	24.2318	25.8414	29.2881	28.8002	26.8005
P70460	Vasodilator-stimulated phosphoprotein	Vasp	0.267864	1	2.31055	4.96073	0.172799	1	2.66996	6.3641	0.879276	1	0.359402	1.28289	0.408001	0.984705	3.54402	11.6642	0.139767	1	4.17001	18.001	0.29942	0.395704	2.40633	5.30124	0.591309	1	-1.76368	0.294497	0.207166	0.481889	4.6874	25.7661	0.875228	0.939516	-0.620294	0.650538	23.4925	23.5498	23.6637	23.0779	24.1778	23.718	17	17	23.7815	17	23.8077
Q8K2I4	Beta-mannosidase	Manba	0.0442243	1	0.568984	1.48348	0.188371	1	0.512344	1.42637	0.866334	1	-0.0566402	0.961501	0.801437	1	0.125126	1.0906	0.0211583	1	0.45704	1.37272	0.262032	0.593406	0.279222	1.21354	0.394301	1	-0.177818	0.884039	0.00897929	0.322309	-0.63349	0.644615	0.0964004	0.176	-0.936433	0.522523	24.9419	25.3066	25.7049	25.5115	24.5314	24.3028	24.9611	25.0723	25.1185	23.8705	24.7135
Q9D8Y1	Transmembrane protein 126A	Tmem126a	0.109731	1	0.475671	1.39056	0.065609	1	0.66183	1.58209	0.557428	1	0.186159	1.13773	0.0339784	0.882595	-0.283326	0.821694	0.403206	1	0.361436	1.2847	0.0471773	0.379495	0.860585	1.81577	0.312229	1	0.499149	1.41338	0.990719	0.998395	-0.0056963	0.996059	0.100119	0.218407	0.776779	1.7133	25.2739	25.1588	24.6639	24.6553	24.4449	24.473	23.8507	25.0606	24.4825	24.6905	24.794
Q8CI59	Metalloreductase STEAP3	Steap3	0.0659777	1	0.392146	1.31234	0.149993	1	0.3036	1.23422	0.477481	1	-0.0885456	0.94047	0.974526	1	0.00927448	1.00645	0.0189869	1	0.555232	1.4694	0.00431199	0.383659	0.401473	1.32086	0.31244	1	-0.153759	0.898905	0.896184	0.984267	-0.0257438	0.982314	0.377641	0.728158	-0.188777	0.877349	23.9057	24.4837	24.6079	24.7061	23.9294	24.1072	24.2728	24.0398	23.8195	23.7675	24.2505
Q9Z1R2	Large proline-rich protein BAG6	Bag6	0.00748572	1	0.374656	1.29653	0.00552005	1	0.378599	1.30008	0.96017	1	0.00394287	1.00274	0.155773	1	-0.118827	0.920936	0.09732	1	0.322355	1.25037	0.0209639	0.388488	0.408144	1.32698	0.472349	1	0.0857894	1.06127	0.8884	0.983931	-0.0206114	0.985815	0.0412361	0.561629	0.184005	1.13603	24.1294	24.16	23.8028	23.8968	23.6026	23.6178	23.8372	23.4986	23.5567	23.6763	23.7819
Q8BX90	Fibronectin type-III domain-containing protein 3A	Fndc3a	0.112222	1	0.33642	1.26262	0.0687081	1	0.183174	1.13538	0.399694	1	-0.153247	0.899225	0.917712	1	-0.0134573	0.990715	0.276924	1	0.365875	1.28866	0.0937823	0.699956	0.119435	1.08631	0.440397	1	-0.24644	0.842974	0.985468	1	-0.00742054	0.99487	0.0396863	0.461701	-0.240403	0.846509	25.7812	25.8595	26.0074	25.8658	25.6194	25.4558	25.8274	25.8363	24.9713	25.4699	25.6322
Q9D0Q7	39S ribosomal protein L45, mitochondrial	Mrpl45	0.0695227	1	0.296837	1.22845	0.108896	1	0.211169	1.15763	0.536069	1	-0.0856682	0.942348	0.890799	1	0.0444517	1.03129	0.146105	1	0.317749	1.24638	0.270811	0.699862	0.145334	1.10599	0.341749	1	-0.172415	0.887356	0.545083	0.906996	0.157348	1.11524	0.770088	0.942913	-0.0595185	0.959584	24.4937	24.228	24.518	24.2307	24.3402	23.9901	23.7125	24.1403	24.1707	23.8944	24.3471
Q99M28	RNA-binding protein with serine-rich domain 1	Rnps1	0.084881	1	0.2956	1.2274	0.16293	1	0.228076	1.17127	0.590584	1	-0.067524	0.954274	0.765063	1	-0.0839863	0.943447	0.323323	1	0.237593	1.17902	0.415656	0.706091	0.181044	1.1337	0.751976	1	-0.0565491	0.961561	0.8505	0.982597	-0.0412868	0.971788	0.948885	0.99121	-0.0138496	0.990446	23.9219	23.8926	23.9535	23.4216	23.3225	23.6316	23.7403	23.5169	23.2978	23.37	23.7521
Q9D7P6	Iron-sulfur cluster assembly enzyme ISCU, mitochondrial	Iscu	0.00386202	1	0.286709	1.21985	0.00355104	1	0.353833	1.27795	0.432727	1	0.0671242	1.04763	0.776852	1	0.0549679	1.03884	0.0345835	1	0.287666	1.22066	0.0246281	0.390216	0.362895	1.286	0.533692	1	0.0752284	1.05353	0.823354	0.982728	-0.0281537	0.980674	0.961785	0.994025	-0.00789324	0.994544	25.7147	25.6511	25.793	25.8465	25.5437	25.3517	25.3419	25.5802	25.5055	25.2527	25.5328
Q91XD7	Protein disulfide isomerase Creld1	Creld1	0.118016	1	0.284837	1.21827	0.0740151	1	0.361176	1.28447	0.621362	1	0.076339	1.05434	0.953698	1	0.0174141	1.01214	0.367408	1	0.22522	1.16896	0.183201	0.549348	0.340842	1.2665	0.553461	1	0.115622	1.08344	0.240737	0.837162	-0.255852	0.837492	0.571131	0.819309	-0.157644	0.896488	24.5796	25.0524	24.442	24.7572	24.2389	24.3001	24.5082	24.7667	24.301	23.9882	24.5159
Q9D379	Epoxide hydrolase 1	Ephx1	0.184515	1	0.277306	1.21193	0.198048	1	0.303417	1.23406	0.887772	1	0.0261105	1.01826	0.614238	1	0.144301	1.1052	0.0239457	1	0.297405	1.22893	0.107918	0.565923	0.244722	1.18486	0.629477	1	-0.0526835	0.964141	0.160369	0.824943	-0.329111	0.796027	0.0309178	0.177748	-0.526096	0.694431	30.8211	31.4732	31.2838	31.5273	30.5741	31.0291	31.0509	31.174	31.1673	30.5691	30.7455
Q9R0U0	Serine/arginine-rich splicing factor 10	Srsf10	0.120078	1	0.249923	1.18914	0.160633	1	0.381772	1.30294	0.568251	1	0.13185	1.0957	0.704838	1	0.128399	1.09308	0.161133	1	0.276043	1.21087	0.309803	0.568667	0.410193	1.32886	0.717647	1	0.13415	1.09745	0.399642	0.858776	0.193557	1.14358	0.69162	0.858433	0.199308	1.14815	24.8886	24.8954	24.4642	24.6906	24.7991	24.4027	24.5826	24.4092	24.2303	24.2555	24.6895
Q8VDL4	ADP-dependent glucokinase	Adpgk	0.0808626	1	0.246669	1.18646	0.113674	1	0.145258	1.10593	0.358152	1	-0.101411	0.932121	0.702543	1	-0.0443516	0.969726	0.290448	1	0.212702	1.15886	0.463312	0.829081	0.0732517	1.05209	0.477798	1	-0.139451	0.907865	0.831256	0.978301	0.0502965	1.03548	0.706759	0.946621	-0.0448027	0.969422	24.8158	24.7048	24.5012	24.5923	24.3807	24.4933	24.296	24.706	24.1582	24.5648	24.3979
P62073	Mitochondrial import inner membrane translocase subunit Tim10	Timm10	0.11517	1	0.207042	1.15432	0.0342007	1	0.256201	1.19433	0.641245	1	0.0491596	1.03466	0.575329	1	0.095252	1.06825	0.159421	1	0.23172	1.17423	0.0429438	0.527911	0.250151	1.18933	0.898966	1	0.0184313	1.01286	0.600761	0.942693	-0.105842	0.929262	0.157163	0.645399	-0.182663	0.881075	26.9573	27.3406	27.1801	27.1553	27.0117	26.7638	26.8295	26.9215	27.2298	26.72	26.865
Q921H9	Cytochrome c oxidase assembly factor 7	Coa7	0.0233549	1	0.204823	1.15254	0.00317621	1	0.209403	1.15621	0.952599	1	0.00458031	1.00318	0.879969	1	0.0241909	1.01691	0.0786693	1	0.240501	1.1814	5.57214e-05	0.393369	0.232008	1.17447	0.937835	1	-0.00849342	0.99413	0.632706	0.954982	0.0742486	1.05281	0.690288	0.946263	0.0415643	1.02923	26.5361	26.5435	26.5769	26.5595	26.4578	26.3296	26.1391	26.492	26.3274	26.2434	26.4957
P59017	Bcl-2-like protein 13	Bcl2l13	0.14768	1	0.176799	1.13037	0.0667891	1	0.195817	1.14537	0.874917	1	0.0190178	1.01327	0.518332	1	-0.116878	0.922181	0.387742	1	0.169117	1.12437	0.00944445	0.393505	0.278732	1.21313	0.54894	1	0.109615	1.07894	0.989581	0.999269	-0.00303682	0.997897	0.150253	0.577747	0.223455	1.16753	26.7628	26.6506	26.8377	26.7225	26.5599	26.5696	26.236	26.7354	26.7321	26.832	26.5314
P70372	ELAV-like protein 1	Elavl1	0.112197	1	0.174711	1.12874	0.116723	1	0.120856	1.08738	0.574134	1	-0.0538551	0.963359	0.785597	1	0.0461617	1.03251	0.238023	1	0.198165	1.14724	0.256653	0.796395	0.0776323	1.05528	0.417167	1	-0.120533	0.919848	0.576457	0.93629	0.107732	1.07753	0.630221	0.919387	-0.0589628	0.959954	26.9207	26.9524	26.7943	26.7798	26.7148	26.7887	26.7309	26.8162	26.3849	26.5615	26.8496
P08226	Apolipoprotein E	Apoe	0.0538678	1	0.173724	1.12797	0.190644	1	0.167363	1.123	0.944781	1	-0.00636101	0.995601	0.671851	1	0.082056	1.05853	0.303486	1	0.133869	1.09723	0.626702	0.852292	0.0685635	1.04867	0.515141	1	-0.0653057	0.955743	0.471742	0.958107	-0.0543013	0.963061	0.292756	0.680845	-0.201663	0.869548	30.9568	30.9974	30.6773	30.9782	30.6579	30.7344	30.6592	30.7831	30.809	30.4515	30.7767
Q9WTU6	Mitogen-activated protein kinase 9	Mapk9	0.146257	1	0.159005	1.11652	0.171597	1	0.301279	1.23224	0.47579	1	0.142274	1.10364	0.0265799	0.9211	0.255027	1.19336	0.0859488	1	0.230913	1.17358	0.39666	0.635067	0.298018	1.22945	0.847305	1	0.067105	1.04761	0.140093	0.818747	0.249352	1.18867	0.888822	0.966059	0.0614297	1.0435	22.844	22.7578	22.6646	22.7755	22.727	22.7752	22.6761	22.3456	22.4835	22.4611	22.531
O08579	Emerin	Emd	0.167608	1	0.157726	1.11553	0.060095	1	0.23455	1.17654	0.487672	1	0.0768238	1.05469	0.624999	1	0.135543	1.09851	0.166815	1	0.229827	1.17269	0.0574122	0.522991	0.267505	1.20372	0.729611	1	0.0376778	1.02646	0.2747	0.859784	0.182875	1.13514	0.655031	0.903268	0.0850102	1.0607	24.5547	24.4504	24.7426	24.4584	24.5805	24.4266	24.1336	24.3729	24.4555	24.5921	24.1439
Q8JZN7	Mitochondrial Rho GTPase 2	Rhot2	0.123346	1	0.155595	1.11388	0.148439	1	0.274679	1.20972	0.444252	1	0.119083	1.08604	0.491949	1	0.28542	1.21877	0.333519	1	0.129498	1.09391	0.386359	0.730797	0.137689	1.10014	0.945229	1	0.00819143	1.00569	0.731275	0.973277	-0.0466916	0.968154	0.309988	0.58414	-0.323921	0.798896	24.4573	24.4887	24.2258	24.5684	24.3859	24.117	24.1856	24.3488	24.36	23.6514	24.2807
Q9EQS3	c-Myc-binding protein	Mycbp	0.128142	1	0.138635	1.10086	0.191513	1	0.203734	1.15168	0.584089	1	0.0650997	1.04616	0.316032	1	-0.171076	0.88818	0.409954	1	0.0685571	1.04867	0.00301061	0.392789	0.291107	1.22358	0.0352211	1	0.22255	1.16679	0.902525	0.988573	0.0112851	1.00785	0.028892	0.313314	0.404911	1.32401	25.6768	25.3345	25.4492	25.3517	25.3122	25.3302	25.2502	25.4407	25.2389	25.3636	25.621
O55022	Membrane-associated progesterone receptor component 1	Pgrmc1	0.165018	1	0.132956	1.09654	0.0224977	1	0.191346	1.14183	0.484972	1	0.05839	1.0413	0.412305	1	0.113607	1.08193	0.170383	1	0.202954	1.15105	0.0475556	0.558748	0.224532	1.1684	0.859168	1	0.0215785	1.01507	0.384843	0.886061	0.136372	1.09914	0.693473	0.946906	0.0443427	1.03121	30.6183	30.6926	30.5643	30.7835	30.6301	30.597	30.3072	30.6648	30.4595	30.3906	30.6093
Q91X77	Cytochrome P450 2C50	Cyp2c50	0.113492	1	0.127148	1.09213	0.191124	1	0.153779	1.11248	0.789214	1	0.0266315	1.01863	0.684234	1	0.118436	1.08556	0.127542	1	0.136596	1.09931	0.315549	0.753664	0.102025	1.07328	0.699659	1	-0.0345713	0.976322	0.290574	0.889625	0.113054	1.08152	0.852551	0.966522	-0.0399529	0.972687	31.6483	31.4148	31.4962	31.6045	31.3928	31.5705	31.3964	31.4293	31.28	31.1277	31.5986
P63037	DnaJ homolog subfamily A member 1	Dnaja1	0.0685797	1	0.125406	1.09081	0.180768	1	0.114276	1.08243	0.866435	1	-0.0111301	0.992315	0.957964	1	-0.00936031	0.993533	0.117619	1	0.15857	1.11618	0.155578	0.672414	0.14626	1.1067	0.830905	1	-0.01231	0.991504	0.28118	0.925573	0.080877	1.05766	0.567458	0.891362	0.0779273	1.0555	28.9964	29.0231	28.8644	29.1115	28.8632	28.9807	28.8751	28.8744	28.7738	28.7854	29.0773
O88952	Protein lin-7 homolog C	Lin7c	0.121504	1	0.12176	1.08806	0.149272	1	0.135171	1.09822	0.818303	1	0.0134109	1.00934	0.965956	1	0.0034647	1.0024	0.00648014	1	0.200947	1.14945	0.0608699	0.56572	0.220989	1.16553	0.83838	1	0.0200418	1.01399	0.734338	0.982458	0.0234324	1.01637	0.749324	0.953512	0.0400095	1.02812	26.4772	26.7429	26.7455	26.7811	26.5232	26.6348	26.6077	26.5739	26.4851	26.5301	26.6209
Q80WJ7	Protein LYRIC	Mtdh	0.116126	1	0.116276	1.08393	0.135189	1	0.080344	1.05727	0.60656	1	-0.0359318	0.975402	0.317814	1	0.126266	1.09147	0.0644513	1	0.16213	1.11894	0.318625	0.939258	0.0180658	1.0126	0.091405	1	-0.144064	0.904966	0.151038	0.858222	0.166003	1.12195	0.223888	0.794078	-0.104328	0.930238	27.8355	27.7674	27.7494	27.7429	27.7202	27.7941	27.6095	27.6909	27.473	27.5426	27.7191
Q91VU6	DDB1- and CUL4-associated factor 11	Dcaf11	0.181699	1	0.111452	1.08031	0.0646072	1	0.150895	1.11026	0.537421	1	0.0394428	1.02772	0.958874	1	0.00652409	1.00453	0.231591	1	0.149794	1.10941	0.0370455	0.564615	0.211183	1.15764	0.524186	1	0.0613887	1.04347	0.983003	0.998784	-0.00257142	0.998219	0.58956	0.924988	0.0522931	1.03691	26.9977	27.1762	27.0349	27.2544	27.0299	26.9756	26.9661	27.1677	26.8823	26.8875	27.105
Q60865	Caprin-1	Caprin1	0.0825006	1	0.0914996	1.06548	0.118264	1	0.072084	1.05123	0.705837	1	-0.0194157	0.986632	0.656361	1	0.0517292	1.03651	0.11535	1	0.109944	1.07919	0.269438	0.869848	0.0430984	1.03032	0.31332	1	-0.0668456	0.954723	0.393161	0.942757	0.0757405	1.0539	0.599646	0.941856	-0.0428343	0.970746	28.3233	28.2605	28.3149	28.2522	28.1909	28.2925	28.2124	28.2217	28.0637	28.1038	28.276
A2AN08	E3 ubiquitin-protein ligase UBR4	Ubr4	0.118278	1	0.0831889	1.05936	0.0533641	1	0.123046	1.08903	0.435221	1	0.0398575	1.02801	0.894646	1	0.015934	1.01111	0.153764	1	0.115232	1.08315	0.0134916	0.580681	0.171039	1.12587	0.390476	1	0.0558065	1.03944	0.823675	0.98456	0.0173257	1.01208	0.537994	0.913528	0.0571982	1.04044	26.6195	26.6647	26.7078	26.7873	26.6112	26.6328	26.5726	26.7116	26.5298	26.5003	26.7119
Q6P1B1	Xaa-Pro aminopeptidase 1	Xpnpep1	0.104073	1	-0.112048	0.925274	0.133115	1	-0.173858	0.886469	0.533128	1	-0.0618099	0.958061	0.907412	1	0.0127144	1.00885	0.115724	1	-0.106852	0.928612	0.152504	0.592961	-0.218345	0.859551	0.443964	1	-0.111493	0.92563	0.436882	0.942464	-0.0801862	0.945936	0.293924	0.67761	-0.204393	0.867904	25.8499	26.0238	26.0163	25.9567	26.1109	25.9403	26.1308	26.0113	26.1753	25.9673	26.0585
Q9DB27	Malignant T-cell-amplified sequence 1	Mcts1	0.199765	1	-0.131743	0.912728	0.0249105	1	-0.234241	0.850132	0.258905	1	-0.102497	0.931419	0.406293	1	-0.132304	0.912373	0.285898	1	-0.176853	0.884631	0.0750745	0.548128	-0.259479	0.83539	0.554728	1	-0.0826263	0.944337	0.584865	0.939057	-0.0888001	0.940304	0.771798	0.956799	-0.0391223	0.973247	26.1063	26.2061	26.0968	25.9008	26.1458	26.1662	26.2492	26.4375	26.0476	26.1619	26.4147
Q8BY87	Ubiquitin carboxyl-terminal hydrolase 47	Usp47	0.163016	1	-0.145546	0.904037	0.122572	1	-0.201262	0.869789	0.625905	1	-0.0557159	0.962117	0.702168	1	-0.0742483	0.949837	0.066632	1	-0.175517	0.88545	0.0929014	0.573267	-0.218878	0.859234	0.7233	1	-0.043361	0.970392	0.0737815	0.809414	-0.22588	0.855073	0.345172	0.714201	-0.194993	0.873577	24.7098	25.0106	24.9308	24.9125	24.9246	24.8773	25.0017	25.1724	25.2064	24.8086	25.1418
Q9JJU8	SH3 domain-binding glutamic acid-rich-like protein	Sh3bgrl	0.0546949	1	-0.155856	0.897599	0.00320698	1	-0.144095	0.904947	0.861523	1	0.0117611	1.00819	0.297957	1	0.0758476	1.05398	0.239296	1	-0.143337	0.905422	0.00406961	0.562494	-0.174301	0.886197	0.786292	1	-0.0309633	0.978767	0.934912	0.989996	0.0123377	1.00859	0.0794832	0.786716	-0.0944732	0.936614	27.4782	27.525	27.5118	27.4887	27.6106	27.7177	27.8061	27.6935	27.4559	27.5787	27.598
Q8BG73	SH3 domain-binding glutamic acid-rich-like protein 2	Sh3bgrl2	0.188664	1	-0.160654	0.89462	0.110817	1	-0.266181	0.831517	0.491756	1	-0.105528	0.929465	0.631384	1	0.0803719	1.05729	0.447154	1	-0.137252	0.90925	0.102663	0.437133	-0.366713	0.775548	0.337574	1	-0.229461	0.852953	0.970233	0.993959	-0.00809034	0.994408	0.233246	0.511551	-0.317923	0.802224	23.5921	23.7321	23.5487	23.815	23.7245	23.931	23.9974	23.5512	23.959	23.648	23.8468
Q8BFW7	Lipoma-preferred partner homolog	Lpp	0.0428433	1	-0.172006	0.887608	0.195228	1	-0.12814	0.915011	0.66123	1	0.043866	1.03087	0.728165	1	0.0374479	1.0263	0.0718297	1	-0.107196	0.928391	0.502698	0.851413	-0.0590509	0.959895	0.620189	1	0.0481447	1.03393	0.0299769	0.825067	0.218191	1.16327	0.160182	0.57701	0.228887	1.17193	27.9811	27.866	27.907	27.9008	28.1992	28.234	28.0625	28.0139	27.9188	28.2713	28.087
P68037	Ubiquitin-conjugating enzyme E2 L3	Ube2l3	0.0327468	1	-0.173615	0.886618	0.0173912	1	-0.22324	0.856639	0.415899	1	-0.0496254	0.966187	0.86875	1	0.0120745	1.0084	0.145119	1	-0.144065	0.904966	0.0476004	0.55028	-0.234823	0.849789	0.316293	1	-0.0907586	0.939029	0.774645	0.983457	-0.0263583	0.981896	0.18587	0.742964	-0.129191	0.914344	28.2034	28.4609	28.2569	28.3734	28.5458	28.4171	28.4196	28.4992	28.6046	28.4734	28.4653
Q91X44	Glucokinase regulatory protein	Gckr	0.129428	1	-0.174268	0.886217	0.0681051	1	-0.175213	0.885637	0.993473	1	-0.000944901	0.999345	0.526403	1	0.164619	1.12087	0.451244	1	-0.0859782	0.942146	0.0037605	0.548898	-0.197299	0.872182	0.355129	1	-0.111321	0.92574	0.136283	0.814508	0.272043	1.20752	0.982522	0.997251	-0.00389798	0.997302	28.9414	28.8851	28.8494	28.8434	29.1831	29.2516	29.0621	29.0323	28.7415	28.839	29.2665
Q6P4T2	U5 small nuclear ribonucleoprotein 200 kDa helicase	Snrnp200	0.0588422	1	-0.178917	0.883366	0.097638	1	-0.147079	0.903077	0.722263	1	0.0318378	1.02231	0.259531	1	0.154959	1.11339	0.136132	1	-0.195527	0.873254	0.041113	0.535907	-0.24577	0.843365	0.713288	1	-0.0502427	0.965774	0.761966	0.97404	0.0478503	1.03372	0.241773	0.719828	-0.157351	0.89667	26.6995	26.6136	26.5348	26.5211	26.8827	26.717	26.8946	26.5568	26.8046	26.5899	26.6999
Q6PIP5	NudC domain-containing protein 1	Nudcd1	0.104037	1	-0.198201	0.871637	0.0619422	1	-0.195157	0.873478	0.978844	1	0.00304451	1.00211	0.426185	1	-0.103079	0.931044	0.274197	1	-0.204482	0.86785	0.347088	0.73093	-0.130689	0.913395	0.707313	1	0.0737934	1.05248	0.868895	0.982186	-0.0366262	0.974932	0.396688	0.779615	0.140246	1.10209	24.6634	24.7587	24.759	24.5729	24.7746	24.9548	25.0968	24.9988	24.6085	24.9158	25.0198
Q14C51	Pentatricopeptide repeat domain-containing protein 3, mitochondrial	Ptcd3	0.0919662	1	-0.203132	0.868663	0.132543	1	-0.22569	0.855186	0.877919	1	-0.0225586	0.984485	0.72866	1	0.0358953	1.02519	0.10783	1	-0.257624	0.836465	0.116274	0.522804	-0.319152	0.801541	0.767794	1	-0.0615279	0.958249	0.303216	0.854973	-0.205665	0.867139	0.227629	0.518513	-0.303088	0.810516	25.0859	25.1957	25.129	25.2664	25.162	25.336	25.6909	25.3472	25.3259	25.1901	25.2362
P63024;P63044	Vesicle-associated membrane protein 3;Vesicle-associated membrane protein 2	Vamp3;Vamp2	0.149622	1	-0.21406	0.862108	0.145957	1	-0.305925	0.808923	0.574432	1	-0.0918652	0.938309	0.168273	1	-0.353689	0.78258	0.408226	1	-0.178176	0.88382	0.671446	0.836308	-0.0954914	0.935953	0.654428	1	0.0826842	1.05899	0.878363	0.982388	0.0289984	1.0203	0.0859278	0.371929	0.465372	1.38067	24.5017	24.6987	24.8133	24.2844	24.6637	24.9483	24.8888	24.563	24.8791	25.247	25.0724
O88545	COP9 signalosome complex subunit 6	Cops6	0.137667	1	-0.216352	0.860739	0.00107502	1	-0.231134	0.851965	0.896274	1	-0.014782	0.989806	0.987671	1	0.00175095	1.00121	0.2636	1	-0.254052	0.838538	0.00461355	0.395031	-0.279856	0.823673	0.898863	1	-0.0258039	0.982273	0.943947	0.98905	-0.0195179	0.986562	0.198079	0.911965	-0.0470727	0.967898	26.0921	25.9873	25.8861	26.0441	26.3039	26.1102	26.5932	26.1295	25.957	26.1788	26.2318
Q9CWG8	Protein arginine methyltransferase NDUFAF7, mitochondrial	Ndufaf7	0.104196	1	-0.218328	0.859561	0.102038	1	-0.277397	0.825078	0.563231	1	-0.0590691	0.959883	0.573217	1	0.0612402	1.04336	0.312806	1	-0.112889	0.924734	0.138635	0.566759	-0.252164	0.839636	0.374736	1	-0.139275	0.907975	0.854823	0.984524	-0.0190061	0.986912	0.281137	0.655995	-0.219522	0.85885	23.1216	23.696	23.5566	23.4687	23.6393	23.696	23.7022	23.803	23.5548	23.5192	23.6937
P61202	COP9 signalosome complex subunit 2	Cops2	0.0398018	1	-0.220536	0.858246	0.0852762	1	-0.165298	0.891744	0.582234	1	0.0552376	1.03903	0.186292	1	0.115056	1.08302	0.248034	1	-0.183126	0.880792	0.236003	0.672059	-0.167768	0.890219	0.932132	1	0.0153586	1.0107	0.857445	0.982783	0.0322965	1.02264	0.683353	0.917842	-0.0674009	0.954356	26.636	26.7169	26.8202	26.6649	26.9643	26.9345	27.0674	27.0206	26.6633	26.7782	26.8905
Q64737	Trifunctional purine biosynthetic protein adenosine-3	Gart	0.0168492	1	-0.226338	0.854802	0.0556462	1	-0.205943	0.866972	0.801884	1	0.0203945	1.01424	0.493119	1	-0.0747795	0.949487	0.106386	1	-0.15941	0.895391	0.401261	0.814583	-0.0755666	0.948969	0.464077	1	0.0838439	1.05984	0.802401	0.9838	0.0284357	1.01991	0.180545	0.648699	0.187059	1.13844	26.8276	27.0697	26.9936	27.0862	27.1724	27.303	27.3193	27.2325	27.0758	27.3743	27.2506
Q8QZR5	Alanine aminotransferase 1	Gpt	0.0627771	1	-0.228453	0.853549	0.0403366	1	-0.162798	0.893291	0.534491	1	0.0656555	1.04656	0.298176	1	0.246854	1.18662	0.197929	1	-0.0935631	0.937205	0.0437346	0.638065	-0.148706	0.902059	0.269173	1	-0.0551434	0.962499	0.0257361	0.784258	0.329005	1.25615	0.835149	0.971956	0.0270081	1.0189	30.8258	30.7476	30.9048	30.8644	31.3454	31.1776	31.0081	30.8849	30.9045	30.8586	31.1707
P16460	Argininosuccinate synthase	Ass1	0.175785	1	-0.232099	0.851395	0.00937226	1	-0.193028	0.874768	0.783926	1	0.0390709	1.02745	0.136192	1	0.304518	1.23501	0.505982	1	-0.0696564	0.952865	0.0313601	0.564357	-0.20755	0.866007	0.258947	1	-0.137894	0.908845	0.0415551	0.573932	0.483114	1.39776	0.665412	0.947335	0.0407022	1.02861	35.3974	35.2083	35.3017	35.3124	35.935	35.7189	35.4833	35.1768	35.3714	35.4583	35.5865
Q9CZ04	COP9 signalosome complex subunit 7a	Cops7a	0.077365	1	-0.232244	0.85131	0.0902683	1	-0.197049	0.872333	0.62153	1	0.0351955	1.0247	0.152419	1	0.0654354	1.0464	0.267916	1	-0.217742	0.85991	0.259292	0.641977	-0.202706	0.868919	0.899565	1	0.0150356	1.01048	0.44712	0.918518	0.106101	1.07632	0.540283	0.913938	0.0557009	1.03936	25.957	25.6217	25.8072	26.107	26.1456	26.1926	26.1419	26.1699	25.8773	26.0868	26.1206
Q9D967	Magnesium-dependent phosphatase 1	Mdp1	0.0375394	1	-0.236613	0.848735	0.066453	1	-0.306954	0.808347	0.623399	1	-0.0703407	0.952413	0.55922	1	-0.174299	0.886198	0.0150028	1	-0.344913	0.787355	0.131573	0.515446	-0.345949	0.786791	0.99594	1	-0.00103505	0.999283	0.303084	0.853376	-0.168728	0.889627	0.988015	0.997292	0.00453663	1.00315	24.041	23.9572	23.8742	23.8019	24.1881	23.9198	24.2565	24.0855	24.3261	24.0161	24.4404
P56380	Bis(5-nucleosyl)-tetraphosphatase [asymmetrical]	Nudt2	0.120842	1	-0.243147	0.844901	0.171756	1	-0.215447	0.861279	0.818173	1	0.0276993	1.01939	0.718497	1	0.0921822	1.06598	0.380392	1	-0.149847	0.901346	0.205103	0.669731	-0.165136	0.891844	0.927151	1	-0.0152893	0.989458	0.870947	0.982782	-0.0331167	0.977307	0.498123	0.808338	-0.140588	0.907149	25.4167	25.7861	25.9861	25.7565	25.863	26.0563	26.2557	25.906	25.8166	26.0676	25.6674
P53810	Phosphatidylinositol transfer protein alpha isoform	Pitpna	0.101398	1	-0.25751	0.836531	0.0963924	1	-0.168826	0.889566	0.497886	1	0.0886833	1.0634	0.132513	1	0.0760612	1.05414	0.190528	1	-0.304747	0.809584	0.114869	0.590095	-0.207649	0.865947	0.638221	1	0.097098	1.06962	0.438955	0.863661	-0.204844	0.867633	0.139805	0.635614	-0.183807	0.880377	25.7205	25.7111	25.9028	25.964	25.9414	25.9771	26.5137	25.9317	26.0467	25.858	25.9083
Q9CQK7	RWD domain-containing protein 1	Rwdd1	0.0403741	1	-0.270696	0.82892	0.0867142	1	-0.352958	0.782977	0.662107	1	-0.082262	0.944575	0.809508	1	0.108343	1.07799	0.015157	1	-0.346002	0.786761	0.00212973	0.262848	-0.555334	0.680499	0.143783	1	-0.209332	0.864938	0.563354	0.918414	-0.133696	0.911493	0.177562	0.432761	-0.451372	0.731347	23.1623	23.0878	23.0638	23.0733	23.0523	23.5223	23.5265	23.4828	23.2536	22.8617	23.4962
Q61151	Serine/threonine-protein phosphatase 2A 56 kDa regulatory subunit epsilon isoform	Ppp2r5e	0.119391	1	-0.276295	0.825709	0.0973324	1	-0.226606	0.854643	0.652943	1	0.0496891	1.03504	0.034595	1	-0.193204	0.874661	0.145659	1	-0.385904	0.765299	0.394714	0.705372	-0.174287	0.886206	0.188457	1	0.211618	1.15799	0.168159	0.808774	-0.289518	0.818175	0.198233	0.773952	0.115303	1.0832	23.1682	23.4532	23.2661	22.8596	23.3184	23.2604	23.3333	23.7076	23.6958	23.4598	23.5054
Q99JX4	Eukaryotic translation initiation factor 3 subunit M	Eif3m	0.12391	1	-0.281715	0.822613	0.146269	1	-0.160851	0.894498	0.44365	1	0.120864	1.08739	0.930834	1	0.0196142	1.01369	0.108883	1	-0.396019	0.759952	0.138623	0.601011	-0.207655	0.865944	0.363488	1	0.188364	1.13947	0.26677	0.824979	-0.334406	0.793111	0.306832	0.727922	-0.165656	0.891523	26.9578	27.214	26.9399	26.953	26.9512	27.2434	27.7133	27.4577	27.124	27.2143	26.941
Q8CHR6	Dihydropyrimidine dehydrogenase [NADP(+)]	Dpyd	0.0366294	1	-0.28555	0.820429	0.117817	1	-0.143896	0.905071	0.224665	1	0.141653	1.10317	0.184876	1	0.339968	1.26573	0.10197	1	-0.19335	0.874572	0.0556325	0.58944	-0.183907	0.880316	0.92223	1	0.00944328	1.00657	0.0505086	0.817194	0.321122	1.2493	0.950817	0.992747	-0.00940228	0.993504	30.4806	30.2375	30.3913	30.3779	30.8756	30.8245	30.6829	30.4459	30.458	30.3412	30.679
Q9D8T2	Gasdermin-D	Gsdmdc1	0.0272313	1	-0.304255	0.80986	0.0388639	1	-0.232271	0.851293	0.442166	1	0.0719833	1.05116	0.635397	1	0.0846272	1.06041	0.129581	1	-0.308643	0.807401	0.115155	0.563041	-0.245089	0.843764	0.658221	1	0.0635541	1.04504	0.760864	0.974458	0.0564451	1.0399	0.78353	0.960693	0.0353721	1.02482	26.438	26.4762	26.3955	26.1188	26.606	26.7846	26.7247	26.7912	26.4006	26.4866	26.7347
Q9QX60	Deoxyguanosine kinase, mitochondrial	Dguok	0.196955	1	-0.31029	0.806479	0.0608103	1	-0.45707	0.728464	0.456798	1	-0.14678	0.903264	0.653927	1	-0.178559	0.883585	0.323684	1	-0.354947	0.781898	0.104072	0.390704	-0.48054	0.716709	0.660566	1	-0.125593	0.916627	0.750979	0.95608	0.112878	1.08138	0.592219	0.823445	0.165845	1.12182	23.5032	23.3981	23.2895	22.7444	23.4958	23.7279	23.9793	23.2028	23.3148	24.1124	23.4684
Q8VDQ1	Prostaglandin reductase 2	Ptgr2	0.0859249	1	-0.316122	0.803226	0.0850197	1	-0.28015	0.823506	0.654316	1	0.0359726	1.02525	0.869351	1	-0.0241375	0.983408	0.201773	1	-0.184577	0.879907	0.092037	0.715858	-0.108531	0.927532	0.546414	1	0.076046	1.05413	0.783133	0.973739	-0.0500851	0.965879	0.479498	0.918942	0.0500984	1.03534	26.3699	26.8965	26.9877	27.0443	27.218	27.0034	27.3278	26.9453	27.2092	27.0623	27.2073
E9PYD1	Family with sequence similarity 98, member C	Fam98c	0.174993	1	-0.317472	0.802475	0.197807	1	-0.158576	0.895909	0.401185	1	0.158895	1.11643	0.641347	1	0.0979433	1.07025	0.384004	1	-0.285952	0.8202	0.54823	0.819939	-0.086422	0.941856	0.547416	1	0.19953	1.14832	0.752686	0.949181	-0.13459	0.910929	0.830916	0.965642	-0.0330029	0.977384	22.9442	23.1507	23.4022	23.304	23.2568	23.6172	24.1193	23.4243	23.1711	23.3442	23.3339
Q8VBT2	L-serine dehydratase/L-threonine deaminase	Sds	0.126898	1	-0.32122	0.800392	0.0875683	1	-0.322156	0.799874	0.995694	1	-0.000935745	0.999352	0.452546	1	0.240755	1.18161	0.0293016	1	-0.252923	0.839194	0.0599587	0.389425	-0.414986	0.750027	0.372023	1	-0.162063	0.893746	0.048741	0.595027	0.472133	1.38716	0.794701	0.941917	0.069315	1.04922	30.7649	30.2196	30.2448	30.3837	31.1787	30.8368	30.638	30.443	30.5259	30.5708	30.9632
O35969	Guanidinoacetate N-methyltransferase	Gamt	0.104868	1	-0.332184	0.794333	0.10461	1	-0.248551	0.841741	0.656444	1	0.0836323	1.05968	0.463357	1	0.194526	1.14435	0.437293	1	-0.168161	0.889976	0.288884	0.687205	-0.158458	0.895982	0.962179	1	0.00970332	1.00675	0.137675	0.815197	0.457367	1.37303	0.246263	0.582105	0.272544	1.20794	28.8869	28.6676	28.9896	28.7763	29.5119	29.3615	29.2427	29.0355	28.6598	29.0394	29.445
P46061	Ran GTPase-activating protein 1	Rangap1	0.0257961	1	-0.33372	0.793488	0.074925	1	-0.240017	0.846735	0.454447	1	0.0937031	1.06711	0.614136	1	-0.131043	0.913171	0.0784337	1	-0.383334	0.766664	0.274146	0.706936	-0.1398	0.907645	0.133436	1	0.243534	1.18389	0.420037	0.8759	-0.166712	0.89087	0.266314	0.663367	0.207865	1.15498	25.1301	25.4064	25.1172	25.0717	25.5189	25.3112	25.8217	25.4018	25.5218	25.7418	25.3504
Q6DFZ1	SEC7 domain-containing protein	Gbf1	0.0399025	1	-0.34196	0.788969	0.0941866	1	-0.382266	0.767232	0.838394	1	-0.0403057	0.972449	0.859723	1	-0.0459623	0.968643	0.0930057	1	-0.401203	0.757227	0.173529	0.462973	-0.437737	0.738292	0.904652	1	-0.0365346	0.974994	0.302464	0.849071	-0.241393	0.845928	0.56321	0.779918	-0.231965	0.851474	22.8468	23.185	22.9747	22.8286	23.1542	23.1575	23.577	23.5165	23.0982	23.4312	22.9724
Q8C5W3	Tubulin-specific chaperone cofactor E-like protein	Tbcel	0.0556684	1	-0.348375	0.785468	0.0591026	1	-0.308521	0.807469	0.817237	1	0.039854	1.02801	0.898911	1	0.0417976	1.0294	0.246778	1	-0.293753	0.815777	0.0591309	0.543428	-0.255195	0.837874	0.865054	1	0.0385583	1.02709	0.465284	0.862963	0.22133	1.16581	0.410013	0.721378	0.218091	1.16319	25.786	25.7572	25.6876	25.5062	26.1151	26.2157	25.8592	25.6419	26.3311	25.8371	26.4101
Q8BWG8	Beta-arrestin-1	Arrb1	0.0637584	1	-0.370177	0.773688	0.0448004	1	-0.273352	0.827395	0.417553	1	0.096825	1.06942	0.151084	1	0.331911	1.25868	0.113166	1	-0.291855	0.816851	0.0591648	0.403046	-0.351755	0.783631	0.347348	1	-0.059899	0.959331	0.0483602	0.748353	0.402881	1.32215	0.796792	0.988654	0.0110709	1.0077	24.4394	24.0279	24.3691	23.9271	24.6641	24.9415	24.4025	24.3047	24.4925	24.425	24.5168
Q8BVE3	V-type proton ATPase subunit H	Atp6v1h	0.110272	1	-0.380496	0.768173	0.0863349	1	-0.343861	0.78793	0.860089	1	0.0366352	1.02572	0.841237	1	-0.0246859	0.983035	0.305196	1	-0.339634	0.790242	0.318997	0.632579	-0.262118	0.833863	0.837515	1	0.0775159	1.0552	0.695429	0.942177	-0.15762	0.896503	0.859001	0.960076	-0.0554187	0.962315	25.0634	25.4263	25.3841	25.6266	25.5797	25.7423	26.3736	25.5956	25.4868	25.6138	25.7576
Q99L43	Phosphatidate cytidylyltransferase 2	Cds2	0.0270291	1	-0.402914	0.756329	0.0848595	1	-0.567885	0.674605	0.570443	1	-0.164971	0.891946	0.536262	1	0.0958939	1.06873	0.113231	1	-0.263098	0.833296	0.254782	0.484926	-0.60198	0.658849	0.511073	1	-0.338881	0.790654	0.119527	0.821495	0.400903	1.32033	0.957553	0.989602	-0.0338717	0.976795	23.7129	23.6292	23.6717	23.5913	24.1815	24.4079	23.8788	24.1227	23.68	24.2618	24.1359
Q8K3W0	BRISC and BRCA1-A complex member 2	Babam2	0.0715741	1	-0.501082	0.706577	0.053901	1	-0.483186	0.715396	0.94732	1	0.0178955	1.01248	0.363709	1	0.156952	1.11493	0.132394	1	-0.625161	0.648347	0.016207	0.307026	-0.69997	0.615585	0.837237	1	-0.0748088	0.949468	0.412315	0.850732	-0.388553	0.763895	0.0481329	0.175765	-0.620314	0.650529	24.533	24.8406	24.6733	24.4611	24.8069	24.983	25.9089	24.9842	24.9573	24.8397	24.6363
O35900	U6 snRNA-associated Sm-like protein LSm2	Lsm2	0.0720059	1	-0.551597	0.682265	0.0666065	1	-0.320892	0.800575	0.385237	1	0.230704	1.17341	0.542776	1	-0.159032	0.895626	0.0317615	1	-0.88317	0.542175	0.109017	0.419518	-0.392641	0.761734	0.205584	1	0.490529	1.40496	0.157998	0.769759	-0.666221	0.630155	0.955547	0.991467	-0.0166607	0.988518	23.9843	23.6819	23.8272	23.663	23.8276	24.0542	24.489	24.2137	25.1187	23.9129	24.2871
Q3ULW8	Protein mono-ADP-ribosyltransferase PARP3	Parp3	0.082815	1	-0.672452	0.627439	0.0400547	1	-0.592259	0.663304	0.813967	1	0.0801933	1.05716	0.529374	1	0.141049	1.10271	0.0865664	1	-1.00108	0.499626	0.00617377	0.250621	-0.961457	0.513538	0.936737	1	0.0396226	1.02784	0.433893	0.84195	-0.518799	0.697953	0.0768814	0.25535	-0.620226	0.650569	23.3441	22.7544	22.8385	22.9861	23.1928	23.4911	24.2976	22.9857	24.2989	23.0881	23.3137
Q6NT99	Dual specificity protein phosphatase 23	Dusp23	0.518923	1	1.05803	2.08208	0.0744651	1	0.363339	1.2864	0.628463	1	-0.694688	0.617843	0.175195	0.890496	0.484085	1.3987	0.429049	1	1.99516	3.9866	0.0502324	0.387048	0.514621	1.42862	0.550527	1	-1.48054	0.358355	0.47642	0.823656	2.37884	5.20119	0.187832	0.448519	0.414221	1.33258	23.5835	23.3617	23.6597	23.5561	23.7404	24.0787	17	23.5993	23.9927	23.5881	23.2628
P10648	Glutathione S-transferase A2	Gsta2	0.583818	1	0.340013	1.26577	0.116688	1	0.615205	1.53178	0.633106	1	0.275193	1.21016	0.402916	1	0.618003	1.53475	0.449135	1	0.695361	1.61929	0.230705	0.417104	0.742014	1.67251	0.96047	1	0.0466525	1.03287	0.523989	0.84655	0.773633	1.70957	0.751069	0.884554	0.202283	1.15052	25.7961	25.6595	25.6971	26.5823	26.5969	25.5189	24.0153	25.1541	26.6834	25.2072	25.6726
Q9JLM9	Growth factor receptor-bound protein 14	Grb14	0.276254	1	0.33411	1.2606	0.103827	1	0.380496	1.30179	0.83891	1	0.0463852	1.03267	0.323446	1	-0.349994	0.784588	0.343496	1	0.351188	1.27561	0.0229897	0.37383	0.661826	1.58208	0.369044	1	0.310638	1.24026	0.44839	0.85285	-0.363729	0.777153	0.143291	0.472478	0.296902	1.2285	23.218	23.6858	23.7471	24.1718	23.4057	22.9009	23.052	24.0476	23.4516	23.4092	23.5974
Q8VDP4	Cell cycle and apoptosis regulator protein 2	Ccar2	0.283762	1	0.264346	1.20109	0.172544	1	0.218684	1.16367	0.804144	1	-0.0456612	0.968846	0.528975	1	-0.260945	0.834541	0.863213	1	0.0416724	1.02931	0.331338	0.719727	0.139534	1.10155	0.689659	1	0.0978616	1.07019	0.57338	0.885261	-0.233398	0.850629	0.389612	0.797344	0.125408	1.09082	25.9533	25.2952	25.4146	25.5982	24.8206	25.5013	25.8092	25.2324	25.1414	25.4814	25.3624
P39039	Mannose-binding protein A	Mbl1	0.303188	1	0.249844	1.18908	0.0872526	1	0.393124	1.31323	0.360816	1	0.14328	1.10441	0.876537	1	-0.0470781	0.967895	0.970549	1	-0.0104644	0.992773	0.266958	0.609012	0.259722	1.19725	0.199776	1	0.270186	1.20596	0.293829	0.839004	-0.299157	0.812727	0.929919	0.988786	0.0181068	1.01263	26.8466	26.6348	25.9396	26.2777	25.9064	26.0843	25.9847	26.5911	26.3077	25.7901	26.2948
Q9D0W5	Peptidyl-prolyl cis-trans isomerase-like 1	Ppil1	0.240013	1	0.240933	1.18176	0.0312471	1	0.326351	1.25384	0.667519	1	0.0854179	1.061	0.358706	1	0.108649	1.07822	0.181886	1	0.407125	1.32604	0.0216244	0.387612	0.477056	1.3919	0.812819	1	0.0699304	1.04967	0.364872	0.846784	0.346889	1.27181	0.152538	0.470104	0.30817	1.23814	24.8448	25.0432	24.8903	24.9302	24.973	24.8156	24.1622	25.0109	24.4691	24.7382	24.8331
Q6TCG2	Membrane progesterone receptor epsilon	Paqr9	0.202433	1	0.236426	1.17807	0.15675	1	0.329244	1.25635	0.622818	1	0.0928173	1.06645	0.709827	1	-0.144415	0.904746	0.583943	1	0.137534	1.10002	0.0812062	0.398301	0.388506	1.30904	0.28915	1	0.250972	1.19001	0.96941	0.992069	-0.0101455	0.992992	0.251791	0.487404	0.385242	1.30608	27.6779	27.5205	27.0395	27.3359	27.2247	27.0771	26.9919	27.5285	26.9628	26.9668	27.6239
Q80U63	Mitofusin-2	Mfn2	0.300215	1	0.231274	1.17387	0.0342436	1	0.446579	1.3628	0.315319	1	0.215305	1.16095	0.0752471	0.760092	0.426153	1.34365	0.0522756	1	0.435516	1.35239	0.0833065	0.392784	0.510255	1.4243	0.702735	1	0.0747395	1.05317	0.00579715	0.322495	0.633883	1.55174	0.317959	0.619586	0.282469	1.21627	25.1065	24.6352	24.9687	25.1239	25.0829	25.1324	24.439	24.6048	24.3775	24.803	24.56
Q7TMY8	E3 ubiquitin-protein ligase HUWE1	Huwe1	0.248775	1	0.227652	1.17093	0.10013	1	0.226062	1.16964	0.992929	1	-0.0015892	0.998899	0.882931	1	0.042408	1.02983	0.277857	1	0.305234	1.23562	0.14132	0.564022	0.274313	1.20942	0.917461	1	-0.0309207	0.978795	0.945767	0.988398	0.0259755	1.01817	0.834402	0.959592	-0.0473531	0.96771	26.3508	26.6926	26.6088	26.5572	26.1172	26.5633	26.4048	26.6773	25.8608	26.1756	26.4202
P13745	Glutathione S-transferase A1	Gsta1	0.625934	1	0.221577	1.16601	0.172798	1	0.43085	1.34803	0.611562	1	0.209274	1.15611	0.156262	0.774177	0.695496	1.61944	0.473993	1	0.497986	1.41224	0.404512	0.622972	0.383112	1.30415	0.868379	1	-0.114875	0.923463	0.587137	0.860513	0.468376	1.38355	0.458518	0.678122	-0.341994	0.78895	27.9408	27.8808	28.2112	28.7991	28.5789	27.9559	27.1065	27.3594	28.9312	27.6013	27.5425
Q8VEK0	Cell cycle control protein 50A	Tmem30a	0.286534	1	0.216053	1.16155	0.154493	1	0.199397	1.14822	0.929057	1	-0.0166565	0.988521	0.603186	1	-0.139734	0.907686	0.750093	1	0.0704384	1.05004	0.311519	0.719662	0.135834	1.09873	0.758284	1	0.0653954	1.04637	0.176417	0.79955	-0.450992	0.73154	0.245076	0.603217	-0.245862	0.843312	27.095	27.4047	27.0882	27.2094	26.5873	26.838	27.2164	27.4539	26.8207	26.6613	27.0435
E9Q8B5	Predicted gene 4788	Gm4788	0.20231	1	0.214335	1.16017	0.184097	1	0.218084	1.16319	0.981622	1	0.00374908	1.0026	0.592537	1	-0.149875	0.901329	0.509877	1	0.172159	1.12674	0.178709	0.566801	0.278323	1.21278	0.673085	1	0.106165	1.07636	0.88726	0.982311	-0.0411946	0.97185	0.411261	0.723259	0.214845	1.16058	25.6509	25.7958	25.4564	25.392	25.4076	25.2618	24.9904	25.4604	25.677	25.7106	25.2585
Q9D1E6	Tubulin-folding cofactor B	Tbcb	0.21713	1	0.211398	1.15781	0.174729	1	0.123754	1.08957	0.546933	1	-0.0876442	0.941058	0.36545	1	-0.249558	0.841154	0.896056	1	0.0204627	1.01428	0.632422	0.8979	0.0407613	1.02866	0.889018	1	0.0202986	1.01417	0.172332	0.836893	-0.376833	0.770127	0.403363	0.825315	-0.106976	0.928533	25.6599	25.4397	25.4231	25.6343	24.9309	25.2726	25.7391	25.3623	25.3344	25.2209	25.4818
Q9QZS3	Protein numb homolog	Numb	0.206517	1	0.21112	1.15759	0.0866852	1	0.323615	1.25146	0.278688	1	0.112495	1.0811	0.755149	1	0.075449	1.05369	0.182974	1	0.284192	1.21773	0.0686165	0.393697	0.421385	1.33921	0.312628	1	0.137192	1.09976	0.483735	0.927795	-0.0989408	0.933718	0.850688	0.965914	-0.0371974	0.974546	24.7249	25.0932	24.9635	25.4697	24.8493	24.7354	24.9545	25.0063	24.713	24.5135	24.9203
Q2LKU9	NACHT, LRR and PYD domains-containing protein 1a	Nlrp1a	0.361788	1	0.202266	1.1505	0.0197322	1	0.268432	1.2045	0.714163	1	0.0661663	1.04693	0.0729324	0.928121	0.297013	1.2286	0.135944	1	0.452573	1.36848	0.0196192	0.392729	0.364841	1.28774	0.720267	1	-0.0877317	0.941001	0.201215	0.807427	0.47522	1.39013	0.328177	0.838798	0.0904748	1.06472	27.2593	27.566	27.3217	27.6127	27.5284	27.5172	27.2692	27.277	26.5965	27.3105	27.141
P62996	Transformer-2 protein homolog beta	Tra2b	0.229866	1	0.193465	1.14351	0.135996	1	0.254144	1.19263	0.74882	1	0.0606792	1.04296	0.847442	1	0.0248232	1.01736	0.0466587	1	0.348998	1.27368	0.000831161	0.367378	0.433582	1.35058	0.541656	1	0.0845833	1.06038	0.0634991	0.705344	0.446927	1.36313	0.0147715	0.163808	0.506687	1.42078	27.3064	27.2069	27.174	27.2596	27.3057	27.3172	26.7489	27.1047	26.7398	27.173	27.4002
Q31125	Zinc transporter SLC39A7	Slc39a7	0.235883	1	0.18567	1.13734	0.0645604	1	0.275307	1.21025	0.453949	1	0.089637	1.0641	0.845999	1	0.0484724	1.03417	0.290181	1	0.249821	1.18906	0.0469084	0.389725	0.366901	1.28958	0.511056	1	0.11708	1.08454	0.967381	0.992155	-0.00954215	0.993408	0.731894	0.936423	0.0590655	1.04179	25.8785	26.1112	26.3876	25.9522	25.9651	25.8168	25.8698	26.1933	25.6385	25.6355	26.0495
P62878	E3 ubiquitin-protein ligase RBX1	Rbx1	0.357192	1	0.176909	1.13046	0.193418	1	0.257017	1.19501	0.554618	1	0.0801075	1.0571	0.664156	1	-0.141174	0.906781	0.205609	1	0.264471	1.2012	0.0347855	0.382614	0.4921	1.40649	0.12966	1	0.227629	1.17091	0.635448	0.9424	-0.109694	0.926785	0.191916	0.552664	0.259109	1.19674	24.985	25.2255	25.6719	25.6349	24.9182	25.3549	25.1334	25.448	25.1573	25.453	25.1025
Q60648	Ganglioside GM2 activator	Gm2a	0.342653	1	0.172211	1.12678	0.110867	1	0.402375	1.32168	0.347737	1	0.230164	1.17297	0.150558	0.930732	0.409622	1.32834	0.0307313	1	0.405748	1.32478	0.18734	0.435192	0.516273	1.43026	0.744343	1	0.110524	1.07962	0.015382	0.417034	0.529438	1.44337	0.618769	0.801916	0.23034	1.17311	25.0692	25.2231	24.9551	25.2904	25.2057	25.3541	24.7214	24.8834	24.6465	24.7064	25.0342
Q61335	B-cell receptor-associated protein 31	Bcap31	0.202639	1	0.163843	1.12027	0.0952849	1	0.191048	1.14159	0.839633	1	0.0272057	1.01904	0.758367	1	0.0545444	1.03853	0.167292	1	0.264861	1.20152	0.0573365	0.516142	0.273841	1.20902	0.962147	1	0.0089798	1.00624	0.329253	0.858747	0.226668	1.17013	0.358234	0.727836	0.181104	1.13375	29.8236	29.9181	29.7784	29.8985	29.8182	29.8354	29.3705	29.8849	29.545	29.6176	29.9269
Q05915	GTP cyclohydrolase 1	Gch1	0.350556	1	0.160446	1.11763	0.157707	1	0.214351	1.16018	0.72491	1	0.0539051	1.03807	0.380285	1	0.276187	1.21099	0.142386	1	0.253907	1.19243	0.276648	0.686041	0.159624	1.117	0.503998	1	-0.0942828	0.936738	0.0502251	0.685786	0.421074	1.33892	0.824835	0.955235	0.0506039	1.0357	25.9409	25.6827	25.4554	25.7848	25.765	25.8514	25.5021	25.4704	25.1887	25.2885	25.7755
Q9D883;Q8BGJ9	Splicing factor U2AF 35 kDa subunit;Splicing factor U2AF 26 kDa subunit	U2af1;U2af1l4	0.341777	1	0.151971	1.11109	0.100439	1	0.287872	1.22084	0.402233	1	0.1359	1.09878	0.755847	1	0.124106	1.08983	0.326125	1	0.132058	1.09586	0.0395987	0.460168	0.275822	1.21068	0.382494	1	0.143763	1.10478	0.452945	0.869476	0.194167	1.14406	0.419141	0.725558	0.213824	1.15976	27.0722	26.7229	26.6636	26.6594	26.9702	26.5179	26.3774	26.7713	26.501	26.3547	26.8852
P47740	Aldehyde dehydrogenase family 3 member A2	Aldh3a2	0.532	1	0.151327	1.11059	0.175042	1	0.334696	1.26111	0.49562	1	0.18337	1.13553	0.302434	1	0.339641	1.26544	0.116005	1	0.44479	1.36112	0.127224	0.390654	0.523979	1.43792	0.796849	1	0.0791893	1.05642	0.0591273	0.460261	0.654716	1.57431	0.34319	0.57334	0.394265	1.31427	31.0941	31.1346	31.0268	31.5	31.4591	31.4017	30.4991	30.7425	31.0853	30.8457	31.3358
Q8BGD8	Cytochrome c oxidase assembly factor 6 homolog	Coa6	0.256153	1	0.151142	1.11045	0.0802476	1	0.194502	1.14433	0.726678	1	0.0433605	1.03051	0.647831	1	0.0458984	1.03233	0.301957	1	0.189498	1.14037	0.0996588	0.567188	0.231167	1.17378	0.821052	1	0.0416686	1.0293	0.388906	0.854881	0.19929	1.14813	0.202993	0.647874	0.19506	1.14477	25.444	25.2947	25.3762	25.165	25.361	25.2158	24.7973	25.1947	25.2753	25.196	25.2891
Q6XVG2	Cytochrome P450 2C54	Cyp2c54	0.239782	1	0.143758	1.10478	0.0548488	1	0.256361	1.19446	0.219105	1	0.112603	1.08118	0.632378	1	0.11698	1.08446	0.654538	1	0.054575	1.03855	0.0775608	0.632796	0.16426	1.12059	0.315877	1	0.109685	1.07899	0.989382	0.999274	0.00204595	1.00142	0.972412	0.995683	-0.00524839	0.996369	29.3771	29.1137	29.0443	28.8934	29.0668	28.8624	29.0385	29.0707	28.7785	28.665	29.0302
Q8R143	Pituitary tumor-transforming gene 1 protein-interacting protein	Pttg1ip	0.271402	1	0.142426	1.10376	0.125271	1	0.282303	1.21613	0.424292	1	0.139877	1.10181	0.39835	1	0.267923	1.20407	0.520581	1	0.120317	1.08697	0.316335	0.682997	0.174829	1.12883	0.806487	1	0.054512	1.03851	0.574086	0.922309	-0.132961	0.911958	0.260725	0.511917	-0.346373	0.786559	24.8344	24.8309	25.0622	24.9829	24.7861	24.6247	24.688	25.1523	24.6748	24.1993	24.6757
Q8K019	Bcl-2-associated transcription factor 1	Bclaf1	0.452331	1	0.134157	1.09745	0.174085	1	0.219083	1.16399	0.605405	1	0.0849262	1.06063	0.373584	1	0.139294	1.10137	0.235338	1	0.189786	1.14059	0.124466	0.571205	0.238468	1.17974	0.790652	1	0.0486813	1.03432	0.125172	0.814057	0.391341	1.31161	0.1419	0.47181	0.300728	1.23177	25.2583	24.8527	24.7764	24.9349	25.1686	24.9439	24.5601	24.9197	24.5148	24.8679	24.9659
Q9ET26	E3 ubiquitin-protein ligase RNF114	Rnf114	0.398966	1	0.134149	1.09744	0.104903	1	0.236591	1.17821	0.554921	1	0.102443	1.07359	0.55244	1	0.0687428	1.0488	0.3473	1	0.234201	1.17626	0.101312	0.440822	0.359111	1.28264	0.67396	1	0.12491	1.09044	0.637733	0.926152	0.150042	1.1096	0.421509	0.729137	0.206209	1.15365	25.7824	25.913	25.9248	25.9899	25.9295	25.7873	25.65	26.1132	25.362	25.7235	25.8559
Q9CQR2	40S ribosomal protein S21	Rps21	0.375099	1	0.133447	1.09691	0.0725439	1	0.182948	1.1352	0.657651	1	0.049501	1.03491	0.929342	1	-0.0113506	0.992163	0.339364	1	0.200874	1.14939	0.00231069	0.389281	0.290943	1.22344	0.647273	1	0.0900688	1.06442	0.860749	0.982315	-0.0460364	0.968594	0.466968	0.91091	0.055383	1.03913	29.076	29.4513	29.4629	29.344	29.0958	29.2492	29.1842	29.5485	28.9229	29.1004	29.2673
Q923D2	Flavin reductase (NADPH)	Blvrb	0.447883	1	0.129858	1.09419	0.163131	1	0.196566	1.14597	0.685314	1	0.066708	1.04732	0.26896	1	0.084651	1.06043	0.444993	1	0.203264	1.1513	0.224426	0.591406	0.25801	1.19583	0.858399	1	0.054746	1.03868	0.959448	0.9911	0.0167316	1.01166	0.955796	0.99213	-0.0131734	0.99091	30.6146	30.9011	30.7695	30.9736	30.7502	30.6396	30.268	30.6932	31.0733	30.602	30.6184
O88487	Cytoplasmic dynein 1 intermediate chain 2	Dync1i2	0.20257	1	0.129855	1.09418	0.055357	1	0.21364	1.15961	0.373236	1	0.0837845	1.05979	0.761222	1	0.0338526	1.02374	0.40776	1	0.104979	1.07548	0.0823316	0.566955	0.222052	1.16639	0.41553	1	0.117072	1.08453	0.612114	0.947294	0.0789064	1.05622	0.256458	0.719598	0.162126	1.11893	26.5963	26.2768	26.4587	26.3763	26.4137	26.2753	26.0702	26.4058	26.3208	26.2422	26.3791
O70325	Phospholipid hydroperoxide glutathione peroxidase	Gpx4	0.23033	1	0.126689	1.09178	0.0376273	1	0.191458	1.14192	0.382644	1	0.0647697	1.04592	0.435418	1	0.0675316	1.04792	0.124833	1	0.221967	1.16632	0.00354825	0.38945	0.284896	1.21832	0.616166	1	0.0629285	1.04458	0.704696	0.964855	0.0596565	1.04222	0.478742	0.912188	0.0550534	1.0389	28.0328	28.3272	28.2621	28.3659	28.1696	28.1426	27.8776	28.2328	28.1789	28.0201	28.1571
P61620	Protein transport protein Sec61 subunit alpha isoform 1	Sec61a1	0.595873	1	0.120499	1.08711	0.185694	1	0.175519	1.12937	0.776089	1	0.0550198	1.03887	0.965528	1	0.00888824	1.00618	0.983422	1	-0.00702477	0.995143	0.62076	0.840804	0.0787493	1.0561	0.777992	1	0.0857741	1.06126	0.505195	0.856693	-0.283554	0.821564	0.157424	0.599949	-0.206669	0.866536	28.9919	29.2119	28.8701	28.7246	28.5421	28.7758	28.8741	29.4634	28.4901	28.5103	28.7899
Q04750	DNA topoisomerase 1	Top1	0.47708	1	0.119108	1.08606	0.177805	1	0.258367	1.19612	0.428009	1	0.139259	1.10134	0.585273	1	0.17762	1.13102	0.265953	1	0.202648	1.15081	0.159776	0.549673	0.316333	1.24516	0.500298	1	0.113685	1.08199	0.100911	0.812258	0.361465	1.28473	0.303617	0.592204	0.29753	1.22904	26.7757	26.7807	26.4806	26.3332	26.8353	26.5453	26.2309	26.4987	26.257	26.2784	26.747
Q8BJ64	Choline dehydrogenase, mitochondrial	Chdh	0.23488	1	0.118427	1.08555	0.119267	1	0.183269	1.13545	0.579985	1	0.0648418	1.04597	0.449557	1	0.234251	1.1763	0.140877	1	0.191462	1.14192	0.201589	0.686241	0.143364	1.10448	0.693984	1	-0.0480976	0.967211	0.341909	0.864909	0.163581	1.12006	0.573308	0.856914	-0.118767	0.920974	30.8184	30.8866	30.7342	30.9256	30.9451	30.6968	30.5129	30.8125	30.6467	30.3683	30.8051
Q99J77	Sialic acid synthase	Nans	0.20038	1	0.117284	1.08469	0.19476	1	0.153997	1.11265	0.754489	1	0.0367123	1.02577	0.838363	1	-0.0506763	0.965484	0.477475	1	0.0976518	1.07003	0.167096	0.630084	0.192623	1.14284	0.573129	1	0.0949713	1.06804	0.870192	0.9822	-0.0283502	0.980541	0.603874	0.866452	0.117297	1.0847	26.2478	26.3087	26.1514	26.1837	26.1658	26.0114	26.0131	26.3469	25.9908	25.9346	26.344
O70305	Ataxin-2	Atxn2	0.246631	1	0.114135	1.08233	0.0238981	1	0.189542	1.1404	0.324823	1	0.0754066	1.05366	0.48433	1	0.155715	1.11397	0.0757052	1	0.203487	1.15148	0.0336276	0.549474	0.225355	1.16907	0.693884	1	0.0218678	1.01527	0.390033	0.889656	0.130301	1.09452	0.966761	0.996592	-0.00354576	0.997545	25.4399	25.7123	25.472	25.5822	25.3639	25.6674	25.3136	25.4807	25.3617	25.2577	25.4621
P51881	ADP/ATP translocase 2	Slc25a5	0.326853	1	0.113512	1.08186	0.154189	1	0.156153	1.11431	0.701714	1	0.0426403	1.03	0.465596	1	0.193425	1.14348	0.198184	1	0.152623	1.11159	0.0948868	0.737507	0.0947405	1.06787	0.598543	1	-0.0578829	0.960673	0.137472	0.821512	0.250699	1.18978	0.997308	0.998193	-0.000608762	0.999578	31.8264	31.6351	31.5529	31.5573	31.7044	31.6553	31.3455	31.6194	31.3225	31.2715	31.7013
Q7M6Z4	Kinesin-like protein KIF27	Kif27	0.54724	1	0.110619	1.07969	0.182977	1	0.312416	1.24179	0.303402	1	0.201797	1.15013	0.514184	1	0.30261	1.23337	0.761136	1	0.0813802	1.05803	0.418929	0.684942	0.215968	1.16148	0.610839	1	0.134588	1.09778	0.668804	0.938184	0.114487	1.08259	0.888366	0.9655	-0.0535355	0.963572	26.3448	26.3907	25.9009	25.8423	26.1716	25.9839	25.99	26.2602	25.6395	25.4017	26.1485
Q9JKP5	Muscleblind-like protein 1	Mbnl1	0.221795	1	0.104582	1.07518	0.0588552	1	0.132651	1.09631	0.749467	1	0.0280689	1.01965	0.890674	1	0.0119209	1.0083	0.147565	1	0.169589	1.12474	0.000928928	0.472318	0.208424	1.15542	0.700495	1	0.0388343	1.02728	0.279215	0.854581	0.168068	1.12355	0.0179027	0.487565	0.194982	1.14471	26.3294	26.3012	26.3025	26.3577	26.2601	26.3778	26.2847	26.1952	25.9727	26.258	26.3561
Q6P9R2	Serine/threonine-protein kinase OSR1	Oxsr1	0.214948	1	0.101733	1.07306	0.195756	1	0.0926334	1.06631	0.896674	1	-0.0090992	0.993713	0.0700098	1	-0.160962	0.894428	0.313568	1	0.0838242	1.05982	0.0624906	0.606827	0.175967	1.12972	0.359466	1	0.0921427	1.06595	0.173708	0.858775	-0.155701	0.897696	0.318848	0.823651	0.0974038	1.06985	24.902	25.0317	25.066	25.1408	24.8723	24.8076	24.8888	24.9842	25.114	25.0322	24.9697
P70122	Ribosome maturation protein SBDS	Sbds	0.220519	1	0.0993235	1.07127	0.0873656	1	0.138777	1.10097	0.394085	1	0.0394531	1.02772	0.433067	1	0.0785694	1.05597	0.306271	1	0.125906	1.09119	0.244004	0.70097	0.139282	1.10136	0.787352	1	0.0133756	1.00931	0.197437	0.899822	0.0967967	1.0694	0.642053	0.956646	0.0316029	1.02215	27.0145	27.1134	27.008	26.7764	26.9725	26.9012	26.7615	26.8967	26.8618	26.7858	26.9307
Q9Z2I8	Succinate--CoA ligase [GDP-forming] subunit beta, mitochondrial	Suclg2	0.306257	1	0.0953333	1.06831	0.139553	1	0.139508	1.10153	0.680138	1	0.0441746	1.03109	0.47157	1	0.209946	1.15664	0.0425889	1	0.179881	1.13279	0.0262529	0.685765	0.113541	1.08188	0.346957	1	-0.0663395	0.955058	0.0835941	0.822659	0.250831	1.18989	0.889589	0.977612	-0.0254542	0.982511	31.7008	31.6654	31.5944	31.6533	31.7954	31.6219	31.4433	31.5634	31.3668	31.2765	31.7209
Q9JMA1	Ubiquitin carboxyl-terminal hydrolase 14	Usp14	0.213027	1	0.0951035	1.06814	0.0736575	1	0.142132	1.10353	0.5604	1	0.047028	1.03313	0.78147	1	-0.029376	0.979844	0.189641	1	0.150121	1.10966	0.00101713	0.394843	0.248085	1.18763	0.374776	1	0.097964	1.07026	0.682099	0.964625	0.0573028	1.04052	0.07513	0.587301	0.184643	1.13654	27.5353	27.6796	27.6422	27.6693	27.5241	27.6177	27.3258	27.6251	27.59	27.5202	27.6804
P35564	Calnexin	Canx	0.548185	1	0.0939757	1.06731	0.124725	1	0.128968	1.09351	0.804724	1	0.0349926	1.02455	0.82399	1	0.0365429	1.02565	0.722209	1	0.0901413	1.06447	0.174498	0.707776	0.1241	1.08983	0.891436	1	0.0339591	1.02382	0.875349	0.98271	0.0504402	1.03558	0.723625	0.94644	0.0478563	1.03373	30.6468	30.6422	30.4408	30.5691	30.5238	30.4982	30.3683	30.8949	30.1185	30.3305	30.6184
Q9ERG0	LIM domain and actin-binding protein 1	Lima1	0.321389	1	0.0895397	1.06403	0.0601594	1	0.14851	1.10842	0.499466	1	0.0589703	1.04172	0.521761	1	0.127592	1.09247	0.399442	1	0.116523	1.08412	0.0996831	0.682099	0.129745	1.0941	0.911754	1	0.0132224	1.00921	0.646828	0.955335	0.0770206	1.05484	0.765909	0.957663	-0.0373491	0.974444	28.6333	28.6656	28.5051	28.6834	28.6509	28.5061	28.6072	28.6156	28.2818	28.3019	28.6
Q8BJW6	Eukaryotic translation initiation factor 2A	Eif2a	0.287375	1	0.088191	1.06304	0.185707	1	0.09699	1.06954	0.919266	1	0.00879898	1.00612	0.678997	1	0.0646677	1.04584	0.488033	1	0.0871881	1.0623	0.182245	0.830146	0.0587413	1.04156	0.814568	1	-0.0284468	0.980475	0.757144	0.973423	-0.0502952	0.965739	0.238782	0.73445	-0.14341	0.905377	27.5356	27.6651	27.5744	27.5968	27.4223	27.5269	27.6068	27.6626	27.3053	27.2856	27.5343
Q99020	Heterogeneous nuclear ribonucleoprotein A/B	Hnrnpab	0.237099	1	0.0877005	1.06268	0.178336	1	0.122182	1.08838	0.701775	1	0.034481	1.02419	0.956989	1	-0.00975609	0.99326	0.286504	1	0.123852	1.08964	0.0281913	0.574181	0.187824	1.13904	0.54147	1	0.0639725	1.04534	0.478885	0.933576	0.0938934	1.06725	0.277777	0.719349	0.167622	1.12321	28.5197	28.5567	28.4239	28.5617	28.4807	28.4875	28.4621	28.4975	28.2111	28.3337	28.6541
Q8CHP5	Partner of Y14 and mago	Pym1	0.3571	1	0.0875978	1.0626	0.0793912	1	0.142386	1.10373	0.467691	1	0.0547882	1.03871	0.188079	1	0.107493	1.07735	0.515506	1	0.0912851	1.06532	0.340454	0.749843	0.110936	1.07993	0.879483	1	0.0196514	1.01371	0.580633	0.941531	0.0842737	1.06015	0.970097	0.99615	-0.00356833	0.99753	26.2311	26.2278	25.9632	26.1421	26.0539	26.1541	25.8169	26.1334	26.1089	26.0184	25.9747
O55111	Desmoglein-2	Dsg2	0.596719	1	0.0872133	1.06232	0.111376	1	0.193984	1.14392	0.400301	1	0.106771	1.07682	0.0850306	0.84335	0.395061	1.315	0.310797	1	0.197599	1.14679	0.510332	0.778601	0.112177	1.08086	0.500433	1	-0.0854219	0.942509	0.0955043	0.818379	0.369507	1.29191	0.277406	0.793154	-0.110975	0.925962	25.7879	25.6313	25.8861	25.3972	25.9333	25.6869	25.3718	25.6293	25.3208	25.4171	25.413
Q5XG73	Acyl-CoA-binding domain-containing protein 5	Acbd5	0.254886	1	0.0864675	1.06177	0.0914008	1	0.173766	1.128	0.227379	1	0.087299	1.06238	0.0794132	1	0.144789	1.10557	0.130108	1	0.0932013	1.06673	0.0653672	0.658392	0.142174	1.10357	0.173751	1	0.0489724	1.03453	0.0059246	0.852431	-0.128414	0.914837	0.0171565	0.458481	-0.22423	0.856052	28.2079	28.4835	28.494	28.3435	28.1974	28.24	28.3351	28.3595	28.3468	28.0361	28.1118
Q8R4N0	Citramalyl-CoA lyase, mitochondrial	Clybl	0.253565	1	0.085275	1.06089	0.0684011	1	0.116678	1.08424	0.561957	1	0.0314026	1.02201	0.567116	1	0.0665283	1.04719	0.312784	1	0.0754064	1.05366	0.0641359	0.749972	0.0833918	1.05951	0.901978	1	0.00798543	1.00555	0.372623	0.92072	0.0950921	1.06813	0.56628	0.947312	0.0365493	1.02566	28.9749	28.8388	28.7679	28.7431	28.8704	28.7355	28.5905	28.7709	28.7621	28.6654	28.8075
Q99KK2	N-acylneuraminate cytidylyltransferase	Cmas	0.262578	1	0.0843183	1.06019	0.115883	1	0.183839	1.1359	0.360862	1	0.0995209	1.07142	0.694459	1	0.113318	1.08171	0.974599	1	-0.00146484	0.998985	0.106711	0.748929	0.0888577	1.06353	0.00115934	1	0.0903225	1.06461	0.116332	0.85052	-0.17688	0.884614	0.320355	0.698281	-0.199876	0.870625	26.9243	26.8629	26.7915	26.9382	26.5815	26.7961	26.8784	26.8697	26.8489	26.35	26.8009
P56528	ADP-ribosyl cyclase/cyclic ADP-ribose hydrolase 1	Cd38	0.588357	1	0.0830529	1.05926	0.129443	1	0.279838	1.21406	0.213034	1	0.196785	1.14614	0.286253	1	0.219593	1.16441	0.340728	1	0.152596	1.11157	0.128111	0.523781	0.334176	1.26066	0.241995	1	0.18158	1.13413	0.0187695	0.646225	0.354817	1.27882	0.194798	0.487148	0.316805	1.24557	25.6678	25.5638	25.1321	25.4389	25.582	25.579	25.1937	25.3402	25.1431	25.2085	25.5133
Q7TMK9	Heterogeneous nuclear ribonucleoprotein Q	Syncrip	0.295665	1	0.0802806	1.05722	0.116879	1	0.101858	1.07315	0.766875	1	0.0215771	1.01507	0.619846	1	0.0678577	1.04816	0.254993	1	0.128979	1.09352	0.103651	0.701529	0.119702	1.08651	0.921255	1	-0.00927671	0.993591	0.306101	0.877677	0.133245	1.09676	0.591937	0.918735	0.056111	1.03966	28.583	28.6597	28.5414	28.4927	28.5563	28.5814	28.4034	28.5937	28.3097	28.3849	28.6171
Q3KNM2	E3 ubiquitin-protein ligase MARCHF5	Marchf5	0.75429	1	0.0780698	1.0556	0.16808	1	0.157973	1.11572	0.712556	1	0.079903	1.05695	0.945092	1	0.0106077	1.00738	0.9988	1	0.000598907	1.00042	0.298473	0.72636	0.126699	1.09179	0.751462	1	0.1261	1.09134	0.954622	0.98891	-0.029164	0.979988	0.56302	0.885882	0.0863282	1.06166	24.4507	24.0859	24.3479	24.1287	24.1847	24.1308	24.41	24.6779	23.4728	24.2809	24.0134
Q05421	Cytochrome P450 2E1	Cyp2e1	0.640288	1	0.0776483	1.0553	0.0567604	1	0.29949	1.23071	0.226718	1	0.221842	1.16622	0.468056	1	0.229963	1.17281	0.950354	1	-0.0104167	0.992806	0.0883522	0.584172	0.206011	1.15349	0.25663	1	0.216427	1.16185	0.265055	0.826903	-0.334259	0.793192	0.101198	0.430816	-0.347795	0.785784	31.637	31.9167	31.7213	31.8206	31.2883	31.7031	31.9047	32.0384	31.5468	31.1109	31.4206
Q91YJ5	Translation initiation factor IF-2, mitochondrial	Mtif2	0.363828	1	0.077154	1.05493	0.0832154	1	0.202426	1.15063	0.288947	1	0.125272	1.09071	0.44929	1	0.135553	1.09851	0.528463	1	0.0735359	1.05229	0.260805	0.658786	0.191953	1.14231	0.544848	1	0.118417	1.08554	0.771525	0.973963	-0.0501191	0.965857	0.759842	0.936537	-0.0672553	0.954452	23.9786	24.0132	24.0811	24.0386	23.8119	24.0294	24.1803	23.8617	23.8702	23.8814	23.6888
Q02248	Catenin beta-1	Ctnnb1	0.508886	1	0.0756248	1.05382	0.140671	1	0.120185	1.08687	0.698537	1	0.0445606	1.03137	0.454639	1	0.151821	1.11097	0.389011	1	0.146106	1.10658	0.205773	0.719166	0.11916	1.0861	0.875422	1	-0.0269464	0.981496	0.443852	0.875143	0.172546	1.12705	0.967676	0.99565	-0.00622114	0.995697	28.2897	28.3591	28.2231	28.3046	28.2496	28.3944	28.3476	28.2364	27.8644	28.0219	28.3185
Q8BTI8	Serine/arginine repetitive matrix protein 2	Srrm2	0.508034	1	0.0747432	1.05317	0.0482875	1	0.126083	1.09133	0.628235	1	0.0513401	1.03623	0.4931	1	0.0898809	1.06428	0.476498	1	0.122323	1.08849	0.010985	0.616217	0.147969	1.10801	0.876619	1	0.0256462	1.01794	0.48419	0.88845	0.157942	1.11569	0.349198	0.834055	0.0937071	1.06711	25.6374	25.6167	25.5814	25.527	25.6128	25.6084	25.4277	25.7305	25.1999	25.4127	25.6288
Q9D7B6	Isobutyryl-CoA dehydrogenase, mitochondrial	Acad8	0.219518	1	0.0742009	1.05278	0.128156	1	0.0822419	1.05866	0.87811	1	0.008041	1.00559	0.60892	1	0.0495224	1.03492	0.138261	1	0.117006	1.08448	0.128326	0.737922	0.0973924	1.06984	0.677083	1	-0.0196133	0.986497	0.0863493	0.858653	0.133827	1.0972	0.388586	0.889421	0.0646915	1.04586	29.2258	29.2775	29.1529	29.1181	29.2093	29.19	29.0388	29.146	29.0127	29.0683	29.232
Q9DBK0	Acetyl-coenzyme A thioesterase	Acot12	0.417796	1	0.0732885	1.05211	0.129131	1	0.167074	1.12278	0.415431	1	0.0937855	1.06717	0.467081	1	0.218165	1.16325	0.0435679	1	0.170096	1.12513	0.0374667	0.586481	0.180962	1.13364	0.871981	1	0.0108655	1.00756	0.0197686	0.821011	0.272852	1.20819	0.753903	0.936243	0.0655521	1.04649	29.0943	28.9898	29.1179	29.0273	29.1712	29.1243	28.7867	28.9111	28.9269	28.6858	29.1734
O88696	ATP-dependent Clp protease proteolytic subunit, mitochondrial	Clpp	0.568865	1	0.0717573	1.051	0.0936	1	0.202524	1.15071	0.324467	1	0.130767	1.09488	0.64324	1	0.116369	1.084	0.629938	1	0.0963701	1.06908	0.0911271	0.565085	0.236736	1.17832	0.50131	1	0.140366	1.10218	0.929709	0.986081	-0.0215371	0.985182	0.990407	0.997136	0.00245921	1.00171	27.8488	28.0361	28.0641	27.8448	27.8135	27.914	27.5541	28.1294	27.9724	27.5379	27.9569
P97352	Protein S100-A13	S100a13	0.735556	1	0.0707644	1.05027	0.0160932	1	0.237392	1.17886	0.386801	1	0.166628	1.12243	0.0182791	0.654034	0.396478	1.31629	0.202965	1	0.26399	1.20079	0.00080163	0.390629	0.277384	1.212	0.941832	1	0.0133947	1.00933	0.0753352	0.571801	0.594848	1.51031	0.0154606	0.467849	0.211765	1.1581	25.7237	25.5888	25.5002	25.5457	25.8527	25.8988	24.9376	25.4474	25.4577	25.5285	25.43
P61255	60S ribosomal protein L26	Rpl26	0.506007	1	0.0691312	1.04908	0.18784	1	0.148003	1.10803	0.536989	1	0.0788719	1.05619	0.822447	1	0.0542145	1.03829	0.95218	1	-0.0086085	0.994051	0.381321	0.795988	0.0867017	1.06194	0.571767	1	0.0953102	1.0683	0.361075	0.85733	-0.18346	0.880588	0.507457	0.8095	-0.142365	0.906033	30.0091	30.0041	30.0387	29.9321	29.7891	29.8445	30.1032	30.1577	29.7397	29.5519	29.9732
Q9DC61	Mitochondrial-processing peptidase subunit alpha	Pmpca	0.403762	1	0.0687535	1.04881	0.132684	1	0.140874	1.10257	0.461355	1	0.0721203	1.05126	0.951888	1	0.0148458	1.01034	0.59293	1	0.0581576	1.04114	0.0983911	0.634575	0.168461	1.12386	0.374801	1	0.110303	1.07946	0.756569	0.972955	-0.0497138	0.966128	0.792447	0.953806	0.0457436	1.03222	27.5622	27.535	27.5778	27.6852	27.6115	27.3714	27.6743	27.5788	27.3704	27.2947	27.6585
Q8BL66	Early endosome antigen 1	Eea1	0.419455	1	0.0686492	1.04873	0.184672	1	0.14279	1.10404	0.304222	1	0.0741409	1.05273	0.664427	1	-0.0409365	0.972024	0.92257	1	-0.0101293	0.993003	0.289449	0.710628	0.14073	1.10246	0.183949	1	0.150859	1.11023	0.446206	0.950379	-0.0612793	0.958414	0.343065	0.779976	0.130516	1.09469	28.8788	28.7628	28.727	28.4954	28.6445	28.5766	28.6151	28.7728	28.6277	28.5777	28.7253
Q9QY76	Vesicle-associated membrane protein-associated protein B	Vapb	0.497372	1	0.0681051	1.04834	0.183389	1	0.127879	1.09269	0.584618	1	0.0597736	1.0423	0.904858	1	-0.0146885	0.98987	0.458526	1	0.115995	1.08372	0.0313107	0.547244	0.22541	1.16911	0.46771	1	0.109415	1.07879	0.54957	0.925374	0.115472	1.08333	0.076311	0.483434	0.239575	1.18064	28.8763	28.8167	28.8387	28.9938	28.8345	28.9307	28.5963	28.6825	29.0225	28.9947	28.7998
Q8VCT4	Carboxylesterase 1D	Ces1d	0.689226	1	0.0677021	1.04805	0.138051	1	0.243441	1.18381	0.344585	1	0.175739	1.12954	0.358249	1	0.29163	1.22402	0.0653505	1	0.296815	1.22843	0.0363821	0.39148	0.395293	1.31521	0.422962	1	0.0984777	1.07064	0.0198755	0.453588	0.502381	1.41655	0.227962	0.515433	0.309229	1.23905	33.0964	33.3959	33.0873	33.144	33.5	33.3292	32.8946	33.0411	32.801	32.8918	33.3542
Q9Z2Z6	Mitochondrial carnitine/acylcarnitine carrier protein	Slc25a20	0.434466	1	0.0657483	1.04663	0.131759	1	0.0921212	1.06594	0.7361	1	0.0263729	1.01845	0.684383	1	-0.0624676	0.957625	0.441593	1	0.0780373	1.05558	0.0504368	0.618253	0.163637	1.12011	0.452573	1	0.0855999	1.06113	0.788246	0.978185	-0.0440381	0.969936	0.236293	0.797	0.104029	1.07477	29.1108	29.2445	29.2649	29.1817	28.9768	29.2399	29.0208	29.3193	29.117	29.1526	29.189
Q5SUC9	Protein SCO1 homolog, mitochondrial	Sco1	0.805616	1	0.0640295	1.04538	0.0387259	1	0.340965	1.2666	0.258456	1	0.276936	1.21162	0.535211	1	0.332057	1.25881	0.680395	1	0.117249	1.08466	0.0562755	0.392242	0.357437	1.28115	0.428314	1	0.240188	1.18115	0.52729	0.857223	0.323397	1.25127	0.270126	0.641375	0.231528	1.17408	25.3152	25.1729	24.9057	24.9534	25.6421	24.7916	24.4957	25.3584	24.8262	24.7461	25.0235
Q9QZQ1	Afadin	Afdn	0.554581	1	0.0627935	1.04449	0.0999463	1	0.1596	1.11698	0.310245	1	0.0968067	1.0694	0.217084	1	0.110848	1.07986	0.911173	1	0.0182775	1.01275	0.448583	0.773443	0.105723	1.07603	0.585455	1	0.0874456	1.06249	0.652241	0.951888	-0.0815903	0.945015	0.403469	0.828307	-0.104993	0.929809	27.037	27.1114	27.0529	26.804	26.951	26.8281	27.007	27.1616	26.7448	26.7887	26.7688
Q8JZU2	Tricarboxylate transport protein, mitochondrial	Slc25a1	0.630004	1	0.0620472	1.04395	0.146932	1	0.151948	1.11107	0.478646	1	0.089901	1.0643	0.477935	1	0.158406	1.11605	0.682972	1	0.0779921	1.05555	0.292577	0.72936	0.122223	1.08841	0.818537	1	0.0442308	1.03113	0.876733	0.982735	-0.0392783	0.973142	0.344149	0.754217	-0.153454	0.899095	29.6774	29.9314	29.7783	29.7024	29.5576	29.8159	29.6616	30.0371	29.4795	29.3987	29.658
Q9WUR2	Enoyl-CoA delta isomerase 2, mitochondrial	Eci2	0.323879	1	0.0606219	1.04292	0.18492	1	0.14278	1.10403	0.278301	1	0.0821583	1.0586	0.729992	1	0.0823011	1.05871	0.339692	1	0.0923494	1.0661	0.143018	0.637847	0.174412	1.1285	0.141083	1	0.082063	1.05853	0.240365	0.977195	0.0259482	1.01815	0.885516	0.977594	0.0257101	1.01798	29.203	29.1197	29.3913	29.3542	29.2429	29.2011	29.2035	29.1829	29.2017	28.9332	29.3462
Q68FL6	Methionine--tRNA ligase, cytoplasmic	Mars1	0.474231	1	0.0590361	1.04177	0.0931309	1	0.148603	1.1085	0.309166	1	0.0895672	1.06405	0.273633	1	0.211758	1.1581	0.229308	1	0.138343	1.10064	0.0524163	0.637493	0.14645	1.10684	0.944027	1	0.00810687	1.00564	0.54221	0.942053	0.0888551	1.06353	0.403137	0.812303	-0.114796	0.923513	28.0642	28.2745	28.2177	28.2257	28.1388	28.2409	28.086	28.2742	27.9427	27.8459	28.1102
Q91V01	Lysophospholipid acyltransferase 5	Lpcat3	0.741668	1	0.0588278	1.04162	0.0832305	1	0.253691	1.19225	0.254521	1	0.194863	1.14462	0.116126	1	0.227307	1.17065	0.60328	1	0.138764	1.10096	0.154442	0.549486	0.311998	1.24143	0.521522	1	0.173234	1.12758	0.432843	0.856954	0.252626	1.19137	0.316522	0.698204	0.198552	1.14755	25.0431	25.1078	25.0584	24.7096	24.9963	25.1486	24.5709	25.2417	24.647	24.8073	24.8831
Q9JMG1	Endothelial differentiation-related factor 1	Edf1	0.655583	1	0.0576279	1.04075	0.0159673	1	0.157483	1.11534	0.405191	1	0.099855	1.07167	0.704358	1	-0.0884056	0.940562	0.608407	1	-0.0617129	0.958126	0.0835061	0.633809	0.163649	1.12012	0.141676	1	0.225362	1.16907	0.285666	0.84951	-0.261667	0.834123	0.583997	0.924836	0.0521005	1.03677	27.1574	27.1655	27.0692	27.0615	27.0979	26.6996	27.0751	27.3712	27.035	27.021	26.9533
P97379	Ras GTPase-activating protein-binding protein 2	G3bp2	0.45243	1	0.0559931	1.03957	0.149881	1	0.124944	1.09047	0.291193	1	0.0689507	1.04895	0.661971	1	0.0609455	1.04315	0.730919	1	0.0388254	1.02728	0.309153	0.739718	0.113113	1.08156	0.432901	1	0.0742874	1.05284	0.824938	0.982064	0.0215642	1.01506	0.77206	0.959837	0.0349061	1.02449	26.7217	26.6926	26.4559	26.707	26.6333	26.5693	26.5866	26.6917	26.4608	26.4247	26.6559
Q3TDQ1	Dolichyl-diphosphooligosaccharide--protein glycosyltransferase subunit STT3B	Stt3b	0.686101	1	0.0550057	1.03886	0.125382	1	0.125599	1.09096	0.599115	1	0.0705936	1.05015	0.943892	1	-0.0113573	0.992159	0.974132	1	0.00684547	1.00476	0.233013	0.70774	0.132073	1.09587	0.592966	1	0.125228	1.09068	0.755318	0.963286	-0.0897357	0.939695	0.761831	0.948958	0.0468493	1.03301	27.3393	27.347	27.2646	27.259	27.1005	27.2867	27.3083	27.6103	26.9315	27.0966	27.3134
Q80XL6	Acyl-CoA dehydrogenase family member 11	Acad11	0.683689	1	0.0534798	1.03776	0.187783	1	0.144794	1.10557	0.527978	1	0.0913139	1.06534	0.317441	1	0.219368	1.16422	0.00202768	1	0.249917	1.18914	0.0304182	0.485864	0.255862	1.19405	0.944459	1	0.00594457	1.00413	0.00311103	0.407195	0.437189	1.35396	0.240962	0.632749	0.223766	1.16778	30.1702	30.2976	30.2418	30.23	30.398	30.4895	29.9837	30.0624	29.9735	30.0647	30.384
P55258	Ras-related protein Rab-8A	Rab8a	0.716758	1	0.0534561	1.03775	0.157907	1	0.195854	1.1454	0.297934	1	0.142398	1.10374	0.59807	1	0.140037	1.10193	0.502433	1	0.136938	1.09957	0.113535	0.549918	0.28091	1.21496	0.33097	1	0.143972	1.10494	0.335435	0.85498	0.22504	1.16881	0.185366	0.586682	0.228975	1.172	26.5138	26.732	26.262	26.4689	26.7216	26.4299	26.4485	26.5046	26.0989	26.2636	26.6078
Q3THG9	Alanyl-tRNA editing protein Aarsd1	Aarsd1	0.580176	1	0.0518562	1.0366	0.191564	1	0.121579	1.08792	0.462105	1	0.0697224	1.04951	0.415596	1	0.203659	1.15162	0.134776	1	0.152315	1.11135	0.199637	0.699805	0.132746	1.09638	0.703225	1	-0.0195688	0.986528	0.0477889	0.827091	0.239748	1.18079	0.91554	0.98855	0.0165199	1.01152	26.345	26.5066	26.3398	26.2433	26.3629	26.5384	26.2368	26.2385	26.1573	26.0673	26.4267
Q9D0G0	28S ribosomal protein S30, mitochondrial	Mrps30	0.769334	1	0.0511007	1.03606	0.0194155	1	0.189113	1.14006	0.384152	1	0.138013	1.10039	0.906588	1	-0.0408058	0.972112	0.782571	1	-0.0488625	0.966698	0.0712721	0.573341	0.208363	1.15538	0.19454	1	0.257225	1.19518	0.410124	0.856068	-0.283117	0.821813	0.891582	0.988361	0.0149136	1.01039	25.6267	25.5882	25.6563	25.7949	25.7408	25.1504	26.0236	25.6578	25.5045	25.4001	25.5726
P62983	Ubiquitin-40S ribosomal protein S27a	Rps27a	0.689302	1	0.0482393	1.034	0.0361909	1	0.186407	1.13793	0.220991	1	0.138167	1.10051	0.429785	1	0.0653763	1.04636	0.567594	1	0.108232	1.07791	0.00943961	0.39306	0.294926	1.22682	0.322329	1	0.186694	1.13815	0.800695	0.973295	0.0595229	1.04212	0.0183029	0.517422	0.180841	1.13354	30.6317	30.8928	30.73	30.7067	30.6696	30.786	30.5359	30.994	30.4748	30.63	30.6948
P45878	Peptidyl-prolyl cis-trans isomerase FKBP2	Fkbp2	0.679669	1	0.047229	1.03328	0.0881256	1	0.192339	1.14261	0.226297	1	0.14511	1.10581	0.292599	1	0.282689	1.21646	0.747455	1	0.0523624	1.03696	0.237699	0.738576	0.105753	1.07606	0.738455	1	0.0533905	1.0377	0.545671	0.920404	0.12592	1.0912	0.558937	0.867164	-0.103378	0.930851	29.0325	28.9356	28.8774	28.7417	28.8736	28.9766	28.8581	29.0076	28.5318	28.4494	28.8354
Q9EP72	ER membrane protein complex subunit 7	Emc7	0.808956	1	0.0467732	1.03295	0.138061	1	0.144521	1.10536	0.558222	1	0.0977474	1.0701	0.777163	1	0.0491457	1.03465	0.966422	1	-0.0126375	0.991279	0.432967	0.752405	0.117511	1.08486	0.661314	1	0.130149	1.09441	0.813551	0.96902	-0.0917756	0.938367	0.928491	0.990902	-0.0107727	0.992561	25.0112	24.8793	24.7633	25.1186	24.6899	24.9927	25.3793	24.9478	24.472	24.806	24.7782
Q9JLT4	Thioredoxin reductase 2, mitochondrial	Txnrd2	0.680853	1	0.0432339	1.03042	0.161473	1	0.142694	1.10396	0.372213	1	0.0994602	1.07137	0.474741	1	0.175198	1.12912	0.0499159	1	0.100808	1.07237	0.110341	0.662259	0.149776	1.1094	0.539181	1	0.0489686	1.03453	0.0851381	0.826486	0.266557	1.20293	0.396231	0.779461	0.140328	1.10216	28.1534	27.9916	27.9063	27.9737	28.2571	27.9888	27.8808	27.8057	27.8827	27.7985	28.097
P11688	Integrin alpha-5	Itga5	0.665708	1	0.0419126	1.02948	0.128223	1	0.0797032	1.0568	0.67104	1	0.0377907	1.02654	0.886512	1	-0.0286942	0.980307	0.871566	1	-0.0175126	0.987935	0.301753	0.828109	0.0646013	1.0458	0.455988	1	0.0821139	1.05857	0.465054	0.896207	-0.139635	0.907749	0.736291	0.964662	-0.0288273	0.980217	24.1727	24.0984	24.2372	24.1398	24.1926	23.88	23.9933	24.2973	24.2372	23.9807	24.1493
Q9D0M5	Dynein light chain 2, cytoplasmic	Dynll2	0.707915	1	0.041519	1.0292	0.132742	1	0.153673	1.1124	0.301544	1	0.112154	1.08084	0.149257	1	0.184212	1.1362	0.255525	1	0.0941556	1.06744	0.102622	0.639808	0.158271	1.11595	0.558144	1	0.0641155	1.04544	0.048262	0.802787	0.287424	1.22046	0.231434	0.700543	0.167328	1.12298	28.5914	28.3517	28.309	28.3654	28.5338	28.5368	28.24	28.371	28.1326	28.2706	28.4315
Q9CX34	Protein SGT1 homolog	Sugt1	0.662691	1	0.03966	1.02787	0.0966458	1	0.124677	1.09026	0.376196	1	0.0850166	1.0607	0.903327	1	-0.0305567	0.979042	0.595072	1	0.0427475	1.03007	0.00913018	0.54879	0.204813	1.15254	0.113512	1	0.162066	1.11889	0.782596	0.97432	-0.0515922	0.964871	0.233357	0.737032	0.14103	1.10269	25.6477	25.7858	25.7222	25.7197	25.842	25.4544	25.6578	25.8381	25.6035	25.5696	25.788
Q9WVA2	Mitochondrial import inner membrane translocase subunit Tim8 A	Timm8a1	0.762736	1	0.035603	1.02499	0.139336	1	0.0482709	1.03402	0.904387	1	0.0126678	1.00882	0.34919	1	0.140652	1.1024	0.209283	1	0.14799	1.10802	0.00586317	0.752896	0.0753352	1.05361	0.501806	1	-0.0726547	0.950887	0.139373	0.826789	0.30698	1.23712	0.00228532	0.762313	0.0936734	1.06708	28.4026	28.3807	28.3632	28.3391	28.636	28.404	28.184	28.3959	28.0592	28.3824	28.3763
Q8R086	Sulfite oxidase, mitochondrial	Suox	0.752678	1	0.033556	1.02353	0.138734	1	0.136401	1.09916	0.314055	1	0.102845	1.07389	0.287471	1	0.238448	1.17972	0.313262	1	0.0909309	1.06506	0.31629	0.751525	0.103373	1.07428	0.897987	1	0.0124423	1.00866	0.104981	0.818151	0.254011	1.19252	0.843511	0.972262	0.0280053	1.0196	30.5754	30.3658	30.3237	30.5061	30.673	30.4502	30.3479	30.3787	30.1961	30.2	30.4463
Q9D6M3	Mitochondrial glutamate carrier 1	Slc25a22	0.832228	1	0.0332395	1.02331	0.127699	1	0.233331	1.17555	0.222867	1	0.200092	1.14877	0.307564	1	0.295156	1.22702	0.503263	1	0.100106	1.07185	0.0730706	0.563037	0.236821	1.17839	0.430442	1	0.136715	1.0994	0.114202	0.811258	0.369869	1.29224	0.361897	0.703476	0.211428	1.15783	28.7639	28.4651	28.3544	28.4992	28.7317	28.6871	28.3503	28.5574	28.1107	28.1979	28.6305
Q9DBR7	Protein phosphatase 1 regulatory subunit 12A	Ppp1r12a	0.89865	1	0.0326887	1.02292	0.126493	1	0.382649	1.30373	0.259348	1	0.34996	1.27453	0.548764	1	0.272985	1.2083	0.870001	1	-0.0651328	0.955857	0.294946	0.583974	0.336145	1.26238	0.430348	1	0.401278	1.32068	0.614627	0.888576	-0.270603	0.828973	0.769468	0.90692	-0.14231	0.906068	25.2081	25.1771	25.1993	25.373	24.9275	25.1611	25.2344	24.7212	25.9891	25.1348	24.4079
Q9DAW9	Calponin-3	Cnn3	0.834345	1	0.0299498	1.02098	0.131036	1	0.0950727	1.06812	0.627822	1	0.065123	1.04617	0.147826	1	0.279374	1.21367	0.168009	1	0.206244	1.15368	0.0838248	0.679679	0.128532	1.09318	0.585681	1	-0.0777111	0.94756	0.0853564	0.812628	0.406354	1.32533	0.672096	0.939702	0.0492684	1.03474	27.4857	27.5276	27.5836	27.5109	27.7928	27.6888	27.1084	27.5207	27.3743	27.3519	27.571
P60229	Eukaryotic translation initiation factor 3 subunit E	Eif3e	0.766329	1	0.0296331	1.02075	0.133811	1	0.111025	1.08	0.427646	1	0.0813919	1.05804	0.824908	1	-0.0444803	0.969639	0.64423	1	-0.0574296	0.960975	0.152463	0.726617	0.107877	1.07764	0.247484	1	0.165307	1.1214	0.368593	0.863367	-0.173318	0.886801	0.787389	0.960027	0.0364688	1.0256	27.7788	27.6494	27.7606	27.7135	27.4832	27.7007	27.7254	27.9736	27.5968	27.4969	27.7759
Q9D024	Coiled-coil domain-containing protein 47	Ccdc47	0.822006	1	0.0269536	1.01886	0.167824	1	0.154628	1.11313	0.212763	1	0.127675	1.09253	0.280791	1	0.247175	1.18688	0.936791	1	0.0127525	1.00888	0.539255	0.85222	0.0607605	1.04302	0.723253	1	0.048008	1.03384	0.507149	0.9187	0.122588	1.08869	0.585401	0.895892	-0.0765797	0.948303	27.9639	27.7345	27.8483	27.5502	27.7752	27.8665	27.7464	27.8843	27.4641	27.4111	27.7362
P35279;P61294	Ras-related protein Rab-6A;Ras-related protein Rab-6B	Rab6a;Rab6b	0.874621	1	0.0212584	1.01484	0.119491	1	0.117813	1.08509	0.408268	1	0.0965542	1.06922	0.233145	1	0.12501	1.09052	0.888804	1	0.0306931	1.0215	0.333271	0.749236	0.108276	1.07794	0.712316	1	0.0775833	1.05525	0.838853	0.978633	0.0542514	1.03832	0.940453	0.993266	0.00682418	1.00474	27.6705	27.7862	27.5571	27.5212	27.611	27.6791	27.5082	27.9508	27.3133	27.5857	27.4543
Q9DCV4	Regulator of microtubule dynamics protein 1	Rmdn1	0.815632	1	0.0195863	1.01367	0.0905216	1	0.099809	1.07163	0.362482	1	0.0802227	1.05718	0.023933	0.887161	0.270009	1.20582	0.0354881	1	0.125687	1.09103	0.370083	0.807442	0.0793858	1.05657	0.613699	1	-0.0463015	0.968416	0.015516	0.813473	0.272398	1.20781	0.689963	0.946094	-0.0439123	0.970021	27.1794	27.194	27.1338	27.1761	27.353	27.2764	27.0146	26.9984	27.1139	27.0632	27.0261
O89112	Glutathione S-transferase LANCL1	Lancl1	0.933711	1	0.0171475	1.01196	0.155099	1	-0.199367	0.870933	0.256198	1	-0.216514	0.860642	0.324459	1	-0.115426	0.92311	0.851576	1	0.0619621	1.04388	0.263191	0.636671	-0.221944	0.857409	0.410858	1	-0.283906	0.821364	0.988575	0.998167	-0.0057888	0.995996	0.353458	0.732238	-0.174269	0.886216	24.8749	25.0443	25.2836	24.8623	24.9246	25.0667	25.4204	25.1281	24.4558	25.1648	25.0574
Q9DBC7	cAMP-dependent protein kinase type I-alpha regulatory subunit	Prkar1a	0.903476	1	0.0147785	1.0103	0.138487	1	-0.161187	0.894289	0.220276	1	-0.175966	0.885175	0.446719	1	-0.139531	0.907814	0.875	1	0.0308119	1.02159	0.254493	0.671049	-0.169444	0.889185	0.419376	1	-0.200256	0.870396	0.753037	0.962235	0.0817146	1.05828	0.921799	0.986725	0.0209901	1.01466	25.5747	25.5356	25.5035	25.4853	25.5382	25.5799	25.8437	25.29	25.2983	25.8456	25.5515
P31809	Carcinoembryonic antigen-related cell adhesion molecule 1	Ceacam1	0.93344	1	0.0134727	1.00938	0.0869051	1	0.21322	1.15927	0.220248	1	0.199747	1.1485	0.303533	1	0.255105	1.19342	0.538011	1	0.148532	1.10844	0.0357836	0.410277	0.311374	1.24089	0.518281	1	0.162842	1.11949	0.515535	0.880164	0.203227	1.15127	0.573529	0.864531	0.110964	1.07995	26.5703	26.8893	26.7576	26.7091	26.8404	26.8397	26.4191	27.0651	26.4262	26.3991	26.7708
Q06138	Calcium-binding protein 39	Cab39	0.960651	1	0.012398	1.00863	0.14247	1	-0.18493	0.879692	0.419321	1	-0.197328	0.872165	0.206461	0.98029	-0.437053	0.738642	0.6007	1	-0.179091	0.883259	0.212347	0.623118	-0.216602	0.86059	0.917296	1	-0.0375112	0.974334	0.343383	0.822823	-0.470231	0.721849	0.767191	0.935861	-0.0706895	0.952183	23.5785	23.5436	23.6671	23.4842	23.1131	23.4345	24.1374	23.1302	23.9646	23.885	23.5367
Q9CR86	Calcium-regulated heat stable protein 1	Carhsp1	0.993093	1	-0.000993538	0.999312	0.107226	1	0.153279	1.11209	0.231606	1	0.154272	1.11286	0.0615626	0.99824	0.262299	1.19939	0.585261	1	0.0844803	1.06031	0.252079	0.672673	0.166735	1.12252	0.678155	1	0.082255	1.05867	0.278973	0.845647	0.237098	1.17862	0.750221	0.941982	0.0570545	1.04034	26.846	26.8165	26.8584	26.7507	26.9467	26.9756	26.4461	26.856	26.8701	26.6321	26.7656
Q6IRU5	Clathrin light chain B	Cltb	0.981402	1	-0.00192289	0.998668	0.198335	1	0.0748017	1.05322	0.32837	1	0.0767246	1.05462	0.436318	1	0.0808964	1.05767	0.850645	1	-0.02513	0.982732	0.514616	0.871237	0.0488135	1.03441	0.58139	1	0.0739435	1.05259	0.839969	0.983781	-0.0329555	0.977416	0.662894	0.946887	-0.0399084	0.972717	27.9672	28.0161	27.924	27.8412	27.8869	27.9516	27.9755	28.1379	27.7433	27.761	27.9157
Q80VJ2	Steroid receptor RNA activator 1	Sra1	0.970778	1	-0.00678806	0.995306	0.0817822	1	0.220343	1.16501	0.232025	1	0.227131	1.17051	0.837436	1	-0.0644436	0.956314	0.340534	1	-0.175616	0.885389	0.0824968	0.559104	0.245899	1.18583	0.0713519	1	0.421515	1.33933	0.118253	0.803707	-0.486998	0.713508	0.996271	0.998651	-0.00104014	0.999279	24.2505	24.2299	24.4306	24.4028	23.8909	24.1952	24.2797	24.7979	24.5125	23.8765	24.3384
Q9D1J3	SAP domain-containing ribonucleoprotein	Sarnp	0.952945	1	-0.0068182	0.995285	0.138998	1	0.125699	1.09104	0.256593	1	0.132517	1.0962	0.00209035	1	0.20128	1.14972	0.405533	1	0.0866038	1.06187	0.0401581	0.596225	0.173279	1.12762	0.424506	1	0.0866756	1.06192	0.0621364	0.821279	0.323565	1.25142	0.0389093	0.488517	0.208961	1.15586	26.7566	26.6334	26.661	26.5433	26.8513	26.8478	26.3583	26.6446	26.575	26.6573	26.6392
Q61316	Heat shock 70 kDa protein 4	Hspa4	0.818941	1	-0.012103	0.991646	0.0863855	1	-0.0774282	0.947746	0.214512	1	-0.0653252	0.95573	0.440416	1	-0.076766	0.948181	0.440163	1	0.0437705	1.0308	0.467915	0.951457	-0.0139275	0.990393	0.331183	1	-0.0576979	0.960796	0.430772	0.941922	0.0757291	1.05389	0.070248	0.783148	0.0947971	1.06792	30.0612	30.1784	30.1453	30.167	30.1251	30.266	30.0566	30.2189	30.0839	30.2335	30.3111
P62774	Myotrophin	Mtpn	0.765059	1	-0.0233027	0.983978	0.0856463	1	-0.104615	0.930053	0.24959	1	-0.0813122	0.945198	0.496319	1	-0.0681515	0.953859	0.983202	1	0.00250308	1.00174	0.181792	0.757851	-0.0875829	0.941098	0.452994	1	-0.090086	0.939467	0.936336	0.989957	-0.0116739	0.991941	0.675769	0.95529	-0.0336084	0.976974	27.6699	27.8433	27.7069	27.8253	27.8027	27.7526	27.9942	27.7089	27.6649	27.767	27.9246
Q9CZ42	ATP-dependent (S)-NAD(P)H-hydrate dehydratase	Naxd	0.621624	1	-0.0279209	0.980833	0.136971	1	-0.100363	0.932798	0.314374	1	-0.0724422	0.951027	0.738318	1	-0.0528765	0.964012	0.878257	1	-0.0108058	0.992538	0.260253	0.753444	-0.0962919	0.935434	0.398315	1	-0.0854861	0.942467	0.636161	0.964352	0.0532656	1.03761	0.872095	0.978043	0.0206559	1.01442	27.3335	27.3622	27.265	27.3229	27.4691	27.2925	27.409	27.3628	27.2108	27.3277	27.5396
Q9CSU0	Regulation of nuclear pre-mRNA domain-containing protein 1B	Rprd1b	0.88567	1	-0.0299637	0.979445	0.112909	1	-0.224976	0.855609	0.371914	1	-0.195012	0.873565	0.755643	1	-0.0328789	0.977468	0.925075	1	-0.0319557	0.978093	0.0814292	0.441578	-0.335057	0.792753	0.431562	1	-0.303101	0.810508	0.942556	0.986256	-0.0324205	0.977778	0.197398	0.500228	-0.302643	0.810766	23.499	23.5003	23.5156	23.6128	23.4586	23.6262	24.1223	23.5789	23.0233	23.5367	23.6139
Q80WW9	DDRGK domain-containing protein 1	Ddrgk1	0.851991	1	-0.0404816	0.97233	0.196374	1	-0.27976	0.823728	0.293532	1	-0.239279	0.847169	0.751965	1	-0.0241394	0.983407	0.973858	1	0.00964546	1.00671	0.0269349	0.390377	-0.37306	0.772143	0.26087	1	-0.382705	0.766998	0.651208	0.922028	-0.178178	0.883818	0.0285622	0.172115	-0.536744	0.689325	25.6643	26.115	26.2262	26.1085	25.9073	26.0168	26.5616	26.233	25.6261	26.0242	25.9482
Q8BK64	Activator of 90 kDa heat shock protein ATPase homolog 1	Ahsa1	0.634054	1	-0.0420691	0.971261	0.125228	1	-0.138328	0.908571	0.370595	1	-0.0962589	0.935456	0.400924	1	0.0663786	1.04709	0.669647	1	0.040116	1.0282	0.251213	0.675948	-0.164568	0.892196	0.243119	1	-0.204684	0.867729	0.145616	0.82361	0.22606	1.16964	0.798759	0.955186	-0.0450023	0.969288	27.7813	27.724	27.7643	27.7568	27.8932	27.9754	27.8498	27.7233	27.5516	27.9154	27.8205
Q3UIR3	E3 ubiquitin-protein ligase DTX3L	Dtx3l	0.876953	1	-0.0448067	0.96942	0.125246	1	-0.138136	0.908693	0.723826	1	-0.0933289	0.937357	0.993145	1	0.00242996	1.00169	0.868464	1	-0.0763448	0.948458	0.00260468	0.424093	-0.233513	0.850561	0.735514	1	-0.157168	0.896784	0.960251	0.988894	-0.0313094	0.978532	0.203156	0.653737	-0.190907	0.876054	25.9699	25.8909	25.8976	25.8931	25.7351	26.1427	26.7519	25.9002	25.2586	26.0823	25.7906
Q8R035	Peptidyl-tRNA hydrolase ICT1, mitochondrial	Mrpl58	0.81273	1	-0.0449497	0.969324	0.0984843	1	-0.258286	0.836081	0.254702	1	-0.213336	0.86254	0.499337	1	-0.204339	0.867936	0.531098	1	-0.158871	0.895726	0.0669152	0.395053	-0.378206	0.769394	0.351652	1	-0.219334	0.858962	0.392055	0.85169	-0.294876	0.815142	0.113481	0.458682	-0.309872	0.806714	23.5581	23.7575	23.6404	23.3248	23.6525	23.224	23.9592	23.8904	23.3498	23.5141	23.771
Q9CWJ9	Bifunctional purine biosynthesis protein PURH	Atic	0.471228	1	-0.0482289	0.967123	0.108754	1	-0.0751771	0.949226	0.676098	1	-0.0269482	0.981494	0.53083	1	0.0395632	1.0278	0.467531	1	0.0214895	1.01501	0.169013	0.846549	-0.0497996	0.966071	0.0574446	1	-0.0712891	0.951787	0.00305468	0.813604	0.213538	1.15953	0.114688	0.780096	0.102686	1.07377	28.6903	28.6693	28.6087	28.6047	28.8052	28.8339	28.5922	28.5865	28.6394	28.7294	28.8307
Q8K2C9	Very-long-chain (3R)-3-hydroxyacyl-CoA dehydratase 3	Hacd3	0.774707	1	-0.049774	0.966088	0.155696	1	0.167936	1.12345	0.217094	1	0.21771	1.16289	0.302554	1	0.339773	1.26556	0.917204	1	-0.0286357	0.980347	0.322105	0.749067	0.107698	1.07751	0.617213	1	0.136334	1.09911	0.799987	0.965405	0.0905056	1.06474	0.576534	0.86389	-0.112933	0.924706	27.7591	27.7712	27.5406	27.7847	27.9208	27.7151	28.0265	27.9169	27.2389	27.2538	27.7026
Q61233	Plastin-2	Lcp1	0.466314	1	-0.0509155	0.965324	0.151271	1	-0.0750034	0.94934	0.68947	1	-0.0240879	0.983442	0.350248	1	0.121218	1.08765	0.96219	1	-0.00291951	0.997978	0.0695497	0.683273	-0.123878	0.917718	0.0304072	1	-0.120958	0.919577	0.112308	0.852003	0.162578	1.11929	0.210941	0.844081	-0.0795981	0.946321	29.3237	29.2511	29.1755	29.3401	29.3415	29.5006	29.3179	29.2534	29.204	29.2388	29.3609
P50516	V-type proton ATPase catalytic subunit A	Atp6v1a	0.596304	1	-0.0547308	0.962774	0.155774	1	-0.112013	0.925296	0.583324	1	-0.0572826	0.961073	0.545165	1	0.131265	1.09525	0.717165	1	0.0299218	1.02096	0.0265986	0.621739	-0.153059	0.899342	0.0844434	1	-0.182981	0.880881	0.0811603	0.836754	0.281395	1.21537	0.818567	0.966273	-0.0328503	0.977487	28.0589	27.9606	27.8948	27.9866	28.2746	28.123	28.0273	27.9429	27.7821	27.9024	28.2327
Q9CQ40	39S ribosomal protein L49, mitochondrial	Mrpl49	0.843026	1	-0.0574113	0.960987	0.0975672	1	-0.164743	0.892088	0.683837	1	-0.107331	0.928304	0.0864205	0.861809	-0.362157	0.778001	0.443949	1	-0.309008	0.807196	0.0691642	0.549089	-0.246456	0.842965	0.874214	1	0.0625521	1.04431	0.299511	0.827639	-0.584344	0.666952	0.322653	0.737653	-0.159635	0.895251	23.9017	23.8204	23.9225	23.7479	23.5064	23.6034	24.8472	23.9049	23.6657	24.0202	23.8139
A8DUK4;P02088	GLOBIN domain-containing protein;Hemoglobin subunit beta-1	Hbb-bs;Hbb-b1	0.941014	1	-0.0596987	0.959464	0.181361	1	-0.769453	0.58664	0.323209	1	-0.709754	0.611424	0.510518	1	-0.924358	0.526915	0.687078	1	-0.424487	0.745104	0.0361095	0.281535	-0.991172	0.503069	0.603094	1	-0.566685	0.675167	0.929431	0.982355	0.135524	1.09849	0.51682	0.678918	0.493198	1.40756	35.994	34.0742	34.6166	34.2633	35.7558	34.0003	33.561	34.0084	36.6581	36.5675	35.0373
Q9DB15	39S ribosomal protein L12, mitochondrial	Mrpl12	0.420074	1	-0.0616614	0.95816	0.172729	1	-0.106845	0.928616	0.588209	1	-0.0451839	0.969166	0.555307	1	-0.0593147	0.95972	0.50958	1	-0.0820243	0.944731	0.310132	0.735209	-0.117788	0.9216	0.804419	1	-0.0357634	0.975515	0.71372	0.972772	-0.0531804	0.963809	0.835013	0.969967	-0.0296291	0.979672	27.1514	27.1844	27.222	27.0587	27.1883	27.1795	27.431	27.1954	27.0848	27.3276	27.1588
Q99K23	Ufm1-specific protease 2	Ufsp2	0.651048	1	-0.064576	0.956226	0.196745	1	-0.154816	0.898247	0.560886	1	-0.0902405	0.939366	0.352028	1	0.0776339	1.05529	0.893554	1	-0.0307751	0.978894	0.186866	0.595868	-0.232932	0.850904	0.465327	1	-0.202157	0.86925	0.800045	0.9725	0.0754964	1.05372	0.340204	0.7006	-0.204294	0.867963	23.8499	23.8245	23.8029	23.9653	23.9258	24.0153	23.9587	24.2224	23.504	23.9394	23.8464
O54962	Barrier-to-autointegration factor	Banf1	0.304393	1	-0.0669249	0.954671	0.141279	1	-0.22554	0.855275	0.220095	1	-0.158615	0.895885	0.619905	1	-0.142349	0.906043	0.65617	1	-0.0375455	0.974311	0.279955	0.649202	-0.207004	0.866335	0.362404	1	-0.169458	0.889176	0.982146	0.998965	-0.00208823	0.998554	0.919836	0.979497	-0.0291974	0.979965	26.3409	26.3488	26.5145	26.5219	26.4298	26.5646	26.6058	26.4616	26.4304	26.875	26.4041
P08030	Adenine phosphoribosyltransferase	Aprt	0.538212	1	-0.0679606	0.953986	0.179517	1	-0.165847	0.891405	0.389211	1	-0.0978859	0.934401	0.956174	1	0.0109901	1.00765	0.594991	1	-0.0587947	0.960066	0.100647	0.566738	-0.229265	0.85307	0.294391	1	-0.17047	0.888553	0.21032	0.849394	0.200144	1.14881	0.926628	0.989029	0.0186838	1.01303	26.7995	26.5787	26.4934	26.4756	26.754	26.7956	26.724	26.6068	26.3932	26.5879	26.9398
P62334	26S proteasome regulatory subunit 10B	Psmc6	0.330405	1	-0.0722216	0.951172	0.115813	1	-0.0691938	0.95317	0.963866	1	0.00302773	1.0021	0.14886	1	0.153983	1.11264	0.660255	1	0.0271975	1.01903	0.13115	0.798814	-0.0704117	0.952366	0.189137	1	-0.0976092	0.93458	0.0661566	0.825003	0.202286	1.15052	0.479874	0.919913	-0.0493066	0.966401	28.5399	28.6489	28.577	28.6157	28.8136	28.7644	28.6126	28.6636	28.4838	28.5725	28.6975
Q9JM14	5(3)-deoxyribonucleotidase, cytosolic type	Nt5c	0.553691	1	-0.0724555	0.951018	0.147651	1	-0.149815	0.901366	0.554435	1	-0.0773594	0.947791	0.892323	1	0.0408421	1.02871	0.467132	1	0.0706164	1.05017	0.260403	0.774157	-0.085544	0.942429	0.197587	1	-0.15616	0.89741	0.174839	0.810126	0.289528	1.22224	0.629208	0.886753	0.0925258	1.06624	25.4045	25.5077	25.5677	25.4652	25.5663	25.8985	25.5491	25.4999	25.2798	25.483	25.9002
Q9CQ10	Charged multivesicular body protein 3	Chmp3	0.767252	1	-0.0774504	0.947731	0.165584	1	-0.27994	0.823625	0.374963	1	-0.20249	0.869049	0.765835	1	0.110189	1.07937	0.688946	1	0.145631	1.10621	0.302944	0.621218	-0.265312	0.832019	0.210907	1	-0.410943	0.752132	0.278361	0.823002	0.464003	1.37936	0.832946	0.954129	-0.0571292	0.961175	23.2229	23.3998	23.7231	22.9955	23.8006	23.5818	22.7409	23.6517	23.2888	23.8854	23.2765
Q3TCH7	Cullin-4A	Cul4a	0.620555	1	-0.0786845	0.946921	0.150176	1	-0.195492	0.873275	0.443433	1	-0.116807	0.922226	0.895614	1	-0.0443668	0.969715	0.853848	1	-0.0331472	0.977286	0.142501	0.61225	-0.198248	0.871608	0.412225	1	-0.165101	0.891866	0.831773	0.975439	-0.0635134	0.956931	0.356586	0.725848	-0.184247	0.880108	25.4788	25.8256	25.6383	25.8237	25.4841	25.9803	26.0688	25.5253	25.7931	25.9432	25.6099
P46460	Vesicle-fusing ATPase	Nsf	0.396131	1	-0.0813685	0.945161	0.116072	1	-0.140541	0.907179	0.527753	1	-0.0591721	0.959815	0.90948	1	-0.0141659	0.990229	0.286572	1	-0.142	0.906262	0.0691935	0.564763	-0.231176	0.85194	0.559037	1	-0.0891762	0.940059	0.809812	0.977454	-0.0423234	0.97109	0.38691	0.804033	-0.117334	0.92189	25.9192	25.6736	25.7762	25.7834	25.742	25.9462	26.0876	25.863	25.7086	25.8168	25.8997
O35658	Complement component 1 Q subcomponent-binding protein, mitochondrial	C1qbp	0.714835	1	-0.0899292	0.939569	0.164121	1	-0.359076	0.779664	0.370614	1	-0.269146	0.82981	0.471391	1	-0.105162	0.929701	0.458992	1	-0.255672	0.837597	0.0137998	0.345949	-0.634142	0.644324	0.313162	1	-0.378469	0.769253	0.315744	0.811003	-0.472392	0.720768	0.0261291	0.141637	-0.7457	0.596378	26.6095	26.546	26.7539	26.8071	26.5534	26.4179	27.5538	26.5738	26.7465	26.4925	26.6891
Q9DBM2	Peroxisomal bifunctional enzyme	Ehhadh	0.650763	1	-0.0963642	0.935387	0.199218	1	0.160312	1.11753	0.236052	1	0.256676	1.19472	0.146975	0.823077	0.516112	1.4301	0.347565	1	0.127839	1.09266	0.0292138	0.559097	0.211558	1.15794	0.569512	1	0.0837193	1.05975	0.0268691	0.381161	0.663968	1.58443	0.283038	0.646098	0.231575	1.17412	32.1927	32.0077	32.0328	32.0409	32.6339	32.4926	31.8181	31.7447	32.1351	31.8353	32.259
Q61206	Platelet-activating factor acetylhydrolase IB subunit beta	Pafah1b2	0.420298	1	-0.0998926	0.933102	0.0956805	1	-0.180902	0.882152	0.496042	1	-0.0810089	0.945396	0.276958	1	-0.191413	0.875748	0.0196842	1	-0.281462	0.822757	0.0498622	0.456439	-0.288868	0.818544	0.943532	1	-0.00740623	0.99488	0.0315477	0.782301	-0.338991	0.790594	0.326053	0.745316	-0.154985	0.898142	24.9453	24.7593	24.6619	24.8629	24.6172	24.7905	25.112	24.9529	25.0636	24.7993	24.9912
Q9D3B1	Very-long-chain (3R)-3-hydroxyacyl-CoA dehydratase 2	Hacd2	0.548956	1	-0.105446	0.929518	0.162604	1	-0.205187	0.867426	0.509354	1	-0.099741	0.933201	0.630254	1	-0.0924158	0.937951	0.575241	1	-0.160644	0.894626	0.219756	0.585515	-0.265268	0.832044	0.688527	1	-0.104624	0.930047	0.84981	0.978406	-0.0583537	0.960359	0.723738	0.923776	-0.0705624	0.952267	27.6263	27.7839	27.2857	27.427	27.5625	27.6399	28.0365	27.6608	27.2813	27.534	27.8532
Q5EBG8	Uncharacterized protein C1orf50 homolog	MGI:2140466	0.493151	1	-0.106157	0.92906	0.130356	1	-0.213086	0.86269	0.459017	1	-0.106929	0.928562	0.492278	1	0.168697	1.12404	0.802825	1	-0.0365009	0.975017	0.0517986	0.417258	-0.327181	0.797092	0.119231	1	-0.290681	0.817516	0.0987495	0.812895	0.358176	1.2818	0.630318	0.886222	-0.101202	0.932256	26.9729	26.7714	26.7345	26.5294	27.0278	27.1184	26.8137	26.844	26.4871	26.7071	27.1017
P58059	28S ribosomal protein S21, mitochondrial	Mrps21	0.423545	1	-0.106192	0.929037	0.121548	1	-0.264911	0.83225	0.348214	1	-0.158719	0.89582	0.535348	1	0.154375	1.11294	0.753242	1	-0.0647055	0.95614	0.0188661	0.381637	-0.432154	0.741154	0.122872	1	-0.367449	0.775152	0.616801	0.936032	0.124606	1.09021	0.116676	0.418506	-0.397217	0.759321	23.968	23.9091	23.8026	24.0919	24.0931	24.1546	24.2469	24.0837	23.6672	23.7638	24.1752
Q9CQB5	CDGSH iron-sulfur domain-containing protein 2	Cisd2	0.327457	1	-0.107822	0.927988	0.145003	1	-0.131793	0.912697	0.805658	1	-0.0239704	0.983522	0.306603	1	0.15173	1.1109	0.49766	1	-0.0966606	0.935195	0.0235793	0.52223	-0.237764	0.848058	0.338496	1	-0.141104	0.906825	0.411613	0.879888	0.152367	1.11139	0.242935	0.739276	-0.140467	0.907226	24.6357	24.428	24.5219	24.3598	24.7335	24.6377	24.7715	24.45	24.3782	24.6346	24.4332
Q9WVT6	Carbonic anhydrase 14	Ca14	0.780193	1	-0.110772	0.926092	0.188014	1	-0.536598	0.689394	0.376001	1	-0.425826	0.744412	0.024558	0.529975	-0.551731	0.682201	0.263888	1	-0.44729	0.733419	0.129646	0.386508	-0.789179	0.578673	0.560025	1	-0.34189	0.789007	0.0908178	0.434444	-1.09346	0.468636	0.199485	0.376417	-0.883619	0.542006	23.7882	24.176	24.2207	24.1782	23.5587	23.5322	25.2026	24.015	24.6991	24.1843	24.0101
P97493	Thioredoxin, mitochondrial	Txn2	0.572049	1	-0.112131	0.92522	0.126908	1	-0.19623	0.872829	0.623037	1	-0.0840988	0.943374	0.521296	1	-0.0678329	0.95407	0.955208	1	-0.0170994	0.988218	0.508724	0.779019	-0.112042	0.925277	0.762102	1	-0.0949427	0.936309	0.834378	0.973492	0.0798165	1.05688	0.75925	0.946446	0.0527067	1.03721	26.1722	26.2302	26.4824	26.5612	26.4498	26.5932	26.9401	26.3638	26.0212	26.5384	26.6403
Q9CZR8	Elongation factor Ts, mitochondrial	Tsfm	0.502439	1	-0.113777	0.924165	0.0725692	1	-0.380429	0.768209	0.236318	1	-0.266651	0.831247	0.896583	1	-0.0399694	0.972676	0.481655	1	-0.179427	0.883054	0.0175746	0.376954	-0.597199	0.661036	0.19815	1	-0.417772	0.74858	0.787253	0.964645	-0.0948321	0.936381	0.149639	0.408736	-0.472635	0.720647	26.6346	26.525	26.4497	26.5966	26.7833	26.4334	27.1442	26.3849	26.5805	26.4403	26.8564
Q6P5F9	Exportin-1	Xpo1	0.296149	1	-0.114858	0.923473	0.125651	1	-0.161221	0.894268	0.693941	1	-0.0463631	0.968374	0.919594	1	0.00678158	1.00471	0.646132	1	-0.0726884	0.950864	0.346558	0.7091	-0.154481	0.898455	0.693569	1	-0.0817928	0.944883	0.49155	0.90164	0.141834	1.10331	0.782458	0.947211	0.0532598	1.03761	26.2367	26.2794	26.1127	26.1433	26.4445	26.3415	26.4483	26.3185	25.9868	26.4159	26.3566
Q9D7N3	28S ribosomal protein S9, mitochondrial	Mrps9	0.381539	1	-0.122941	0.918314	0.176771	1	-0.192163	0.875293	0.660295	1	-0.0692223	0.953152	0.993169	1	-0.00223637	0.998451	0.30557	1	-0.205203	0.867417	0.0228026	0.389224	-0.319082	0.80158	0.532349	1	-0.11388	0.9241	0.404854	0.853863	-0.216953	0.860381	0.133474	0.458574	-0.328596	0.796311	24.7638	24.7313	24.6889	24.9253	24.8918	24.6484	25.3046	24.8414	24.8151	24.5754	24.9693
P13439	Uridine 5-monophosphate synthase	Umps	0.440639	1	-0.125798	0.916497	0.166212	1	-0.235675	0.849288	0.513201	1	-0.109877	0.926667	0.894756	1	-0.0383215	0.973787	0.59335	1	-0.0869827	0.94149	0.103261	0.565868	-0.244563	0.844072	0.441717	1	-0.15758	0.896528	0.187523	0.821159	0.326905	1.25432	0.44613	0.738733	0.207647	1.1548	26.4705	26.1502	26.0443	26.1137	26.4744	26.5588	26.3674	26.3035	25.8983	26.3024	26.8075
P14685	26S proteasome non-ATPase regulatory subunit 3	Psmd3	0.225372	1	-0.127863	0.915186	0.101499	1	-0.137557	0.909057	0.900381	1	-0.00969429	0.993303	0.589526	1	0.0884113	1.0632	0.728434	1	-0.0361722	0.975239	0.20607	0.729384	-0.11127	0.925773	0.48742	1	-0.075098	0.949278	0.616503	0.944576	0.0823046	1.05871	0.332719	0.861746	-0.0812047	0.945268	28.2641	28.4436	28.6011	28.4526	28.4803	28.7549	28.6803	28.5314	28.3942	28.5085	28.5499
P16331	Phenylalanine-4-hydroxylase	Pah	0.303878	1	-0.138436	0.908504	0.124477	1	-0.20082	0.870056	0.666514	1	-0.062384	0.95768	0.240184	1	0.233034	1.1753	0.746841	1	-0.0634778	0.956954	0.0210494	0.3957	-0.322807	0.799513	0.218741	1	-0.259329	0.835476	0.499276	0.886691	0.170298	1.12529	0.0749624	0.431886	-0.322065	0.799924	32.3313	32.2197	32.4328	32.4236	32.6412	32.5437	32.7571	32.3035	32.2059	32.2271	32.4917
A2ADY9	Protein DDI1 homolog 2	Ddi2	0.414037	1	-0.138626	0.908384	0.187566	1	-0.130167	0.913725	0.959101	1	0.00845833	1.00588	0.323453	1	0.171632	1.12633	0.770962	1	-0.0770601	0.947987	0.17508	0.639009	-0.177384	0.884305	0.727297	1	-0.100324	0.932823	0.728002	0.944542	0.123062	1.08904	0.421411	0.779916	-0.148894	0.901942	28.0423	28.1336	28.0665	28.0748	28.2232	28.3604	28.5669	28.2213	27.718	28.0073	28.233
Q61510	E3 ubiquitin/ISG15 ligase TRIM25	Trim25	0.273038	1	-0.142813	0.905751	0.198281	1	-0.16223	0.893643	0.813004	1	-0.0194168	0.986631	0.638617	1	-0.0911646	0.938765	0.0628864	1	-0.211576	0.863593	0.0660481	0.596511	-0.183161	0.880771	0.60569	1	0.028415	1.01989	0.597607	0.945025	0.0797879	1.05686	0.0114358	0.473194	0.199368	1.14819	25.8318	25.352	25.3679	25.5673	25.5563	25.8846	25.567	25.6318	25.7232	25.7846	25.8386
A2A5R2	Brefeldin A-inhibited guanine nucleotide-exchange protein 2	Arfgef2	0.610122	1	-0.144578	0.904644	0.116921	1	-0.248807	0.841592	0.662035	1	-0.104229	0.930302	0.601	1	-0.120889	0.919621	0.669997	1	-0.190139	0.876521	0.228617	0.581755	-0.283261	0.821732	0.828259	1	-0.0931218	0.937492	0.943022	0.984303	0.0397857	1.02796	0.714705	0.924625	0.0675526	1.04794	23.7992	23.6366	23.2487	23.7745	23.6022	23.9642	24.4648	23.6063	23.1592	23.9804	23.8277
A3KMP2	Tetratricopeptide repeat protein 38	Ttc38	0.281838	1	-0.149346	0.901659	0.0670207	1	-0.0977657	0.934479	0.658351	1	0.0515804	1.0364	0.0575429	0.883851	0.308673	1.23857	0.820756	1	0.0268129	1.01876	0.0947743	0.739998	-0.0930017	0.93757	0.310066	1	-0.119815	0.920306	0.0650799	0.806985	0.380578	1.30186	0.462005	0.922189	-0.0479091	0.967337	29.3009	29.3785	29.476	29.3353	29.7709	29.7298	29.4469	29.4962	29.1663	29.3671	29.5164
[truncated: 2,366 more rows]
[truncated: 77 more columns]
